# Supplementary material for: Widespread Repression of Gene Expression in Cancer by a Wnt/β-Catenin/MAPK Pathway
Source: Oxford University Press journal article supplement (doi:10.1158/0008-5472.can-20-2129), 2020-11-17
Supplement: 00085472can202129-sup-245850_3_supp_6707322_qjh5sx.xlsx [file 00085472can202129-sup-245850_3_supp_6707322_qjh5sx.xlsx]

## Sheet: README
	GO Biological Process Enrichments for timeseries clusters C6, C2, C4 and C8

## Sheet: C6
GOBPID	Pvalue	OddsRatio	ExpCount	Count	Size	Term	adjustedPvalue	ensembl_gene_id	hgnc_symbol
GO:0043087	2.10726e-11	3.31608	16.9278	49	685	regulation of GTPase activity	9.75242e-08	ENSG00000008086,ENSG00000100485,ENSG00000100852,ENSG00000105738,ENSG00000106069,ENSG00000107185,ENSG00000107263,ENSG00000107862,ENSG00000108239,ENSG00000111348,ENSG00000113916,ENSG00000114331,ENSG00000115839,ENSG00000126217,ENSG00000130396,ENSG00000131089,ENSG00000134909,ENSG00000136158,ENSG00000136237,ENSG00000137486,ENSG00000138193,ENSG00000139132,ENSG00000139436,ENSG00000140463,ENSG00000141736…	CDKL5,SOS2,ARHGAP5,SIPA1L3,CHN2,RGP1,RAPGEF1,GBF1,TBC1D12,ARHGDIB,BCL6,ACAP2,RAB3GAP1,MCF2L,MLLT4,ARHGEF9,ARHGAP32,SPRY2,RAPGEF5,ARRB1,PLCE1,FGD4,GIT2,BBS4,ERBB2,RASA1,ARHGAP26,DOCK1,ASAP2,PTPRN2,NCK1,ABR,JAK1,SPRY1,TSC1,ARHGAP42,TBC1D2B,AKAP13,SPTBN2,DENND4A,SNX18,BCR,ARHGEF12,ITSN2,RUNDC1,RASGEF1A,TBC1D8,CCPG1,ARHGAP23
GO:0044700	6.47255e-10	1.84799	149.854	210	6064	single organism signaling	1.11908e-06	ENSG00000004799,ENSG00000005882,ENSG00000008952,ENSG00000011021,ENSG00000019186,ENSG00000025796,ENSG00000026950,ENSG00000046604,ENSG00000051382,ENSG00000052795,ENSG00000058091,ENSG00000064201,ENSG00000071242,ENSG00000072062,ENSG00000073969,ENSG00000075223,ENSG00000075711,ENSG00000077157,ENSG00000077232,ENSG00000078687,ENSG00000080561,ENSG00000082196,ENSG00000084234,ENSG00000085117,ENSG00000085832…	PDK4,PDK2,SEC62,CLCN6,CYP24A1,SEC63,BTN3A1,DSG2,PIK3CB,FNIP2,CDK14,TSPAN32,RPS6KA2,PRKACA,NSF,SEMA3C,DLG1,PPP1R12B,DNAJC10,TNRC6C,MID2,C1QTNF3,APLP2,CD82,EPS15,MAVS,SIRT4,GABRP,SOS2,DAAM1,ARHGAP5,NDFIP2,DNAJC3,BFAR,SPG11,SIPA1L3,ITGB8,TAX1BP1,CHN2,WASL,CORO2A,RAPGEF1,UNC5B,LZTS2,GBF1,MTMR4,RAB5C,PRKAR1A,INPP4B,DTX4,IL10RA,BIRC2,TRPV4,ARHGDIB,VDR,GCNT2,ERBB2IP,IK,COL4A3BP,LNPEP,BCL6,KAT2B,STAM2,SN…
GO:0023052	7.25421e-10	1.84454	150.027	210	6071	signaling	1.11908e-06	ENSG00000004799,ENSG00000005882,ENSG00000008952,ENSG00000011021,ENSG00000019186,ENSG00000025796,ENSG00000026950,ENSG00000046604,ENSG00000051382,ENSG00000052795,ENSG00000058091,ENSG00000064201,ENSG00000071242,ENSG00000072062,ENSG00000073969,ENSG00000075223,ENSG00000075711,ENSG00000077157,ENSG00000077232,ENSG00000078687,ENSG00000080561,ENSG00000082196,ENSG00000084234,ENSG00000085117,ENSG00000085832…	PDK4,PDK2,SEC62,CLCN6,CYP24A1,SEC63,BTN3A1,DSG2,PIK3CB,FNIP2,CDK14,TSPAN32,RPS6KA2,PRKACA,NSF,SEMA3C,DLG1,PPP1R12B,DNAJC10,TNRC6C,MID2,C1QTNF3,APLP2,CD82,EPS15,MAVS,SIRT4,GABRP,SOS2,DAAM1,ARHGAP5,NDFIP2,DNAJC3,BFAR,SPG11,SIPA1L3,ITGB8,TAX1BP1,CHN2,WASL,CORO2A,RAPGEF1,UNC5B,LZTS2,GBF1,MTMR4,RAB5C,PRKAR1A,INPP4B,DTX4,IL10RA,BIRC2,TRPV4,ARHGDIB,VDR,GCNT2,ERBB2IP,IK,COL4A3BP,LNPEP,BCL6,KAT2B,STAM2,SN…
GO:0007154	9.70894e-10	1.83571	150.472	210	6089	cell communication	1.12332e-06	ENSG00000004799,ENSG00000005882,ENSG00000008952,ENSG00000011021,ENSG00000019186,ENSG00000025796,ENSG00000026950,ENSG00000046604,ENSG00000051382,ENSG00000052795,ENSG00000058091,ENSG00000064201,ENSG00000071242,ENSG00000072062,ENSG00000075223,ENSG00000075711,ENSG00000077157,ENSG00000077232,ENSG00000078687,ENSG00000080561,ENSG00000082196,ENSG00000084234,ENSG00000085117,ENSG00000085832,ENSG00000088888…	PDK4,PDK2,SEC62,CLCN6,CYP24A1,SEC63,BTN3A1,DSG2,PIK3CB,FNIP2,CDK14,TSPAN32,RPS6KA2,PRKACA,SEMA3C,DLG1,PPP1R12B,DNAJC10,TNRC6C,MID2,C1QTNF3,APLP2,CD82,EPS15,MAVS,SIRT4,GABRP,MTMR3,SOS2,DAAM1,ARHGAP5,NDFIP2,DNAJC3,BFAR,SPG11,SIPA1L3,ITGB8,TAX1BP1,CHN2,WASL,CORO2A,RAPGEF1,UNC5B,LZTS2,GBF1,MTMR4,RAB5C,PRKAR1A,INPP4B,DTX4,IL10RA,BIRC2,TRPV4,ARHGDIB,VDR,GCNT2,ERBB2IP,IK,COL4A3BP,LNPEP,BCL6,KAT2B,STAM2,…
GO:0043547	1.66769e-09	3.1114	15.5686	43	630	positive regulation of GTPase activity	1.54361e-06	ENSG00000008086,ENSG00000100485,ENSG00000100852,ENSG00000105738,ENSG00000106069,ENSG00000107185,ENSG00000107263,ENSG00000107862,ENSG00000108239,ENSG00000111348,ENSG00000114331,ENSG00000115839,ENSG00000126217,ENSG00000130396,ENSG00000131089,ENSG00000134909,ENSG00000136237,ENSG00000137486,ENSG00000138193,ENSG00000139132,ENSG00000139436,ENSG00000141736,ENSG00000145715,ENSG00000145819,ENSG00000150760…	CDKL5,SOS2,ARHGAP5,SIPA1L3,CHN2,RGP1,RAPGEF1,GBF1,TBC1D12,ARHGDIB,ACAP2,RAB3GAP1,MCF2L,MLLT4,ARHGEF9,ARHGAP32,RAPGEF5,ARRB1,PLCE1,FGD4,GIT2,ERBB2,RASA1,ARHGAP26,DOCK1,ASAP2,NCK1,ABR,JAK1,TSC1,ARHGAP42,TBC1D2B,AKAP13,SPTBN2,DENND4A,SNX18,BCR,ARHGEF12,ITSN2,RUNDC1,RASGEF1A,TBC1D8,ARHGAP23
GO:0051056	2.13217e-09	4.38421	6.99352	27	283	regulation of small GTPase mediated signal transduction	1.64461e-06	ENSG00000100485,ENSG00000100852,ENSG00000105738,ENSG00000106069,ENSG00000107263,ENSG00000107862,ENSG00000111348,ENSG00000113916,ENSG00000116574,ENSG00000126217,ENSG00000131089,ENSG00000134909,ENSG00000136158,ENSG00000137486,ENSG00000138193,ENSG00000139132,ENSG00000145715,ENSG00000145819,ENSG00000159842,ENSG00000164056,ENSG00000165895,ENSG00000170776,ENSG00000186716,ENSG00000196914,ENSG00000198399…	SOS2,ARHGAP5,SIPA1L3,CHN2,RAPGEF1,GBF1,ARHGDIB,BCL6,RHOU,MCF2L,ARHGEF9,ARHGAP32,SPRY2,ARRB1,PLCE1,FGD4,RASA1,ARHGAP26,ABR,SPRY1,ARHGAP42,AKAP13,BCR,ARHGEF12,ITSN2,RASGEF1A,ARHGAP23
GO:0051234	6.34306e-09	1.81772	114.541	168	4635	establishment of localization	4.19367e-06	ENSG00000006747,ENSG00000008283,ENSG00000008952,ENSG00000011021,ENSG00000021762,ENSG00000025796,ENSG00000026950,ENSG00000047457,ENSG00000051382,ENSG00000062725,ENSG00000068912,ENSG00000072062,ENSG00000073734,ENSG00000073969,ENSG00000075711,ENSG00000077380,ENSG00000082196,ENSG00000084234,ENSG00000085832,ENSG00000088888,ENSG00000089163,ENSG00000094755,ENSG00000100242,ENSG00000100280,ENSG00000100665…	SCIN,CYB561,SEC62,CLCN6,OSBPL5,SEC63,BTN3A1,CP,PIK3CB,APPBP2,ERLEC1,PRKACA,ABCB11,NSF,DLG1,DYNC1I2,C1QTNF3,APLP2,EPS15,MAVS,SIRT4,GABRP,SUN2,AP1B1,SERPINA4,MAGT1,NDFIP2,PARP4,LONP2,SPG11,TUSC3,WASL,RGP1,LZTS2,GBF1,TBC1D12,RAB5C,TRPV4,VDR,ERBB2IP,COL4A3BP,CLINT1,SEC24A,BCL6,STAM2,SNX17,CHMP3,RAB3GAP1,SLC25A12,RHOU,LEPR,KDM5B,PIK3R3,ESYT2,MFSD1,TJP2,RAB14,VPS4B,AFTPH,SLC10A7,PLS1,TRIM6,PIK3CA,VAMP7…
GO:0006810	8.73573e-09	1.81341	111.427	164	4509	transport	5.05362e-06	ENSG00000006747,ENSG00000008283,ENSG00000008952,ENSG00000011021,ENSG00000021762,ENSG00000025796,ENSG00000026950,ENSG00000047457,ENSG00000051382,ENSG00000062725,ENSG00000068912,ENSG00000072062,ENSG00000073734,ENSG00000073969,ENSG00000075711,ENSG00000077380,ENSG00000082196,ENSG00000084234,ENSG00000085832,ENSG00000088888,ENSG00000089163,ENSG00000094755,ENSG00000100242,ENSG00000100280,ENSG00000100665…	SCIN,CYB561,SEC62,CLCN6,OSBPL5,SEC63,BTN3A1,CP,PIK3CB,APPBP2,ERLEC1,PRKACA,ABCB11,NSF,DLG1,DYNC1I2,C1QTNF3,APLP2,EPS15,MAVS,SIRT4,GABRP,SUN2,AP1B1,SERPINA4,MAGT1,NDFIP2,PARP4,LONP2,SPG11,TUSC3,WASL,RGP1,LZTS2,GBF1,TBC1D12,RAB5C,TRPV4,VDR,ERBB2IP,COL4A3BP,CLINT1,SEC24A,BCL6,STAM2,SNX17,CHMP3,RAB3GAP1,SLC25A12,RHOU,LEPR,KDM5B,PIK3R3,ESYT2,MFSD1,TJP2,RAB14,VPS4B,AFTPH,SLC10A7,PLS1,TRIM6,PIK3CA,VAMP7…
GO:0030036	1.24945e-08	3.11257	13.6411	38	552	actin cytoskeleton organization	6.17615e-06	ENSG00000006747,ENSG00000075711,ENSG00000100592,ENSG00000106078,ENSG00000106299,ENSG00000106789,ENSG00000108946,ENSG00000111199,ENSG00000111348,ENSG00000113916,ENSG00000116574,ENSG00000120756,ENSG00000137486,ENSG00000138594,ENSG00000139132,ENSG00000140463,ENSG00000141298,ENSG00000141503,ENSG00000145715,ENSG00000145819,ENSG00000151422,ENSG00000151491,ENSG00000154639,ENSG00000158092,ENSG00000158195…	SCIN,DLG1,DAAM1,COBL,WASL,CORO2A,PRKAR1A,TRPV4,ARHGDIB,BCL6,RHOU,PLS1,ARRB1,TMOD3,FGD4,BBS4,SSH2,MINK1,RASA1,ARHGAP26,FER,EPS8,CXADR,NCK1,WASF2,EPB41,ABR,ALOX15,ARFIP1,TSC1,AKAP13,PRKCE,SPTBN2,BCR,CD2AP,CDC42BPB,FMN1,CYFIP1
GO:0051179	1.33452e-08	1.76335	140.464	195	5684	localization	6.17615e-06	ENSG00000006747,ENSG00000008086,ENSG00000008283,ENSG00000008952,ENSG00000011021,ENSG00000021762,ENSG00000025796,ENSG00000026950,ENSG00000046604,ENSG00000047457,ENSG00000048052,ENSG00000051382,ENSG00000062725,ENSG00000068912,ENSG00000072062,ENSG00000073734,ENSG00000073969,ENSG00000075223,ENSG00000075711,ENSG00000077380,ENSG00000080561,ENSG00000082196,ENSG00000084234,ENSG00000085832,ENSG00000088888…	SCIN,CDKL5,CYB561,SEC62,CLCN6,OSBPL5,SEC63,BTN3A1,DSG2,CP,HDAC9,PIK3CB,APPBP2,ERLEC1,PRKACA,ABCB11,NSF,SEMA3C,DLG1,DYNC1I2,MID2,C1QTNF3,APLP2,EPS15,MAVS,SIRT4,TINF2,GABRP,SUN2,AP1B1,ABHD4,SERPINA4,MAGT1,NDFIP2,PARP4,LONP2,SPG11,TUSC3,WASL,RGP1,LZTS2,GBF1,TBC1D12,RAB5C,TRPV4,ARHGDIB,VDR,GCNT2,ERBB2IP,COL4A3BP,CLINT1,SEC24A,BCL6,USP4,ACAP2,STAM2,SNX17,CHMP3,IL1R1,RAB3GAP1,SLC25A12,DHCR24,RHOU,LEPR,…
GO:0016192	1.47409e-08	2.26605	35.017	70	1417	vesicle-mediated transport	6.20191e-06	ENSG00000006747,ENSG00000021762,ENSG00000051382,ENSG00000073969,ENSG00000077380,ENSG00000084234,ENSG00000085832,ENSG00000100280,ENSG00000100665,ENSG00000104133,ENSG00000106299,ENSG00000107185,ENSG00000107862,ENSG00000108239,ENSG00000108774,ENSG00000113282,ENSG00000113615,ENSG00000115234,ENSG00000115561,ENSG00000115839,ENSG00000116678,ENSG00000117868,ENSG00000119396,ENSG00000119541,ENSG00000121879…	SCIN,OSBPL5,PIK3CB,NSF,DYNC1I2,APLP2,EPS15,AP1B1,SERPINA4,SPG11,WASL,RGP1,GBF1,TBC1D12,RAB5C,CLINT1,SEC24A,SNX17,CHMP3,RAB3GAP1,LEPR,ESYT2,RAB14,VPS4B,PIK3CA,VAMP7,LDLR,PRKAA1,TMED7,STXBP1,ARRB1,LOXL4,VPS53,PI4KB,GOLPH3L,EXOC6B,GULP1,HYOU1,DOCK1,FER,VPS26B,RAB11FIP1,NCK1,WASF2,SYNJ1,ABR,ITGB2,VPS11,ALOX15,PIGR,AP1G1,TBC1D2B,MYO5B,TMED10,CD14,PRKCE,RAB43,SPTBN2,PACS1,SNX18,CREB3L2,BCR,CD2AP,ITSN2,…
GO:0023051	2.07981e-08	1.89888	73.7409	119	2984	regulation of signaling	8.02115e-06	ENSG00000051382,ENSG00000058091,ENSG00000072062,ENSG00000073969,ENSG00000075711,ENSG00000080561,ENSG00000082196,ENSG00000085832,ENSG00000088888,ENSG00000089163,ENSG00000100485,ENSG00000100852,ENSG00000102471,ENSG00000103429,ENSG00000105738,ENSG00000106052,ENSG00000106069,ENSG00000107263,ENSG00000107731,ENSG00000107816,ENSG00000107862,ENSG00000108389,ENSG00000110330,ENSG00000111199,ENSG00000111348…	PIK3CB,CDK14,PRKACA,NSF,DLG1,MID2,C1QTNF3,EPS15,MAVS,SIRT4,SOS2,ARHGAP5,NDFIP2,BFAR,SIPA1L3,TAX1BP1,CHN2,RAPGEF1,UNC5B,LZTS2,GBF1,MTMR4,BIRC2,TRPV4,ARHGDIB,GCNT2,ERBB2IP,BCL6,STAM2,IL1R1,RAB3GAP1,RHOU,APAF1,TRIM6,PIK3CA,NCOA3,VAMP7,MCF2L,DYRK2,MACF1,APOL3,SLC44A2,SEC14L1,ARHGEF9,TRAF7,PER2,PRKAA1,NUMB,KIDINS220,ARHGAP32,TAOK3,FAIM2,SPRY2,STXBP1,ARRB1,IFT172,PPM1B,PLCE1,BMPR1B,FGD4,GIT2,PELI2,MINK…
GO:0048583	2.34778e-08	1.84436	86.5665	134	3503	regulation of response to stimulus	8.35811e-06	ENSG00000001561,ENSG00000026950,ENSG00000051382,ENSG00000058091,ENSG00000064201,ENSG00000068912,ENSG00000072062,ENSG00000075223,ENSG00000075711,ENSG00000080561,ENSG00000082196,ENSG00000085832,ENSG00000088888,ENSG00000100280,ENSG00000100485,ENSG00000100852,ENSG00000102471,ENSG00000102580,ENSG00000103429,ENSG00000105738,ENSG00000106052,ENSG00000106069,ENSG00000106299,ENSG00000107263,ENSG00000107731…	ENPP4,BTN3A1,PIK3CB,CDK14,TSPAN32,ERLEC1,PRKACA,SEMA3C,DLG1,MID2,C1QTNF3,EPS15,MAVS,AP1B1,SOS2,ARHGAP5,NDFIP2,DNAJC3,BFAR,SIPA1L3,TAX1BP1,CHN2,WASL,RAPGEF1,UNC5B,LZTS2,GBF1,MTMR4,BIRC2,TRPV4,ARHGDIB,GCNT2,ERBB2IP,BCL6,STAM2,IL1R1,RHOU,PIK3R3,APAF1,TRIM6,PIK3CA,NCOA3,VAMP7,BBS2,MCF2L,DYRK2,MACF1,APOL3,SLC44A2,SEC14L1,LDLR,ARHGEF9,TRAF7,PRKAA1,NUMB,KIDINS220,ARHGAP32,TAOK3,FAIM2,SPRY2,ARRB1,IFT172,…
GO:0007165	2.95944e-08	1.74015	138.956	192	5623	signal transduction	9.78305e-06	ENSG00000004799,ENSG00000005882,ENSG00000008952,ENSG00000011021,ENSG00000019186,ENSG00000025796,ENSG00000026950,ENSG00000051382,ENSG00000052795,ENSG00000058091,ENSG00000064201,ENSG00000071242,ENSG00000072062,ENSG00000075223,ENSG00000075711,ENSG00000077157,ENSG00000077232,ENSG00000078687,ENSG00000080561,ENSG00000082196,ENSG00000084234,ENSG00000085117,ENSG00000085832,ENSG00000088888,ENSG00000094755…	PDK4,PDK2,SEC62,CLCN6,CYP24A1,SEC63,BTN3A1,PIK3CB,FNIP2,CDK14,TSPAN32,RPS6KA2,PRKACA,SEMA3C,DLG1,PPP1R12B,DNAJC10,TNRC6C,MID2,C1QTNF3,APLP2,CD82,EPS15,MAVS,GABRP,SOS2,DAAM1,ARHGAP5,NDFIP2,DNAJC3,BFAR,SIPA1L3,ITGB8,TAX1BP1,CHN2,WASL,CORO2A,RAPGEF1,UNC5B,LZTS2,GBF1,MTMR4,RAB5C,PRKAR1A,INPP4B,DTX4,IL10RA,BIRC2,TRPV4,ARHGDIB,VDR,GCNT2,ERBB2IP,COL4A3BP,LNPEP,BCL6,KAT2B,STAM2,SNX17,GALNT3,EFEMP1,IL1R1,…
GO:0007010	3.23948e-08	2.3953	27.1586	58	1099	cytoskeleton organization	9.99489e-06	ENSG00000006747,ENSG00000064201,ENSG00000075711,ENSG00000100242,ENSG00000100271,ENSG00000100592,ENSG00000105738,ENSG00000106078,ENSG00000106299,ENSG00000106789,ENSG00000107816,ENSG00000108946,ENSG00000111199,ENSG00000111348,ENSG00000112851,ENSG00000113916,ENSG00000115561,ENSG00000116574,ENSG00000119541,ENSG00000120756,ENSG00000125124,ENSG00000130779,ENSG00000136158,ENSG00000137486,ENSG00000138002…	SCIN,TSPAN32,DLG1,SUN2,TTLL1,DAAM1,SIPA1L3,COBL,WASL,CORO2A,LZTS2,PRKAR1A,TRPV4,ARHGDIB,ERBB2IP,BCL6,CHMP3,RHOU,VPS4B,PLS1,BBS2,CLIP1,SPRY2,ARRB1,IFT172,PLCE1,TMOD3,FGD4,BBS4,SSH2,MINK1,LIMD1,RASA1,ARHGAP26,DOCK1,FER,EPS8,CXADR,NCK1,WASF2,EPB41,ABR,ALOX15,SPRY1,ARFIP1,BRWD3,TSC1,KRT4,AKAP13,MTM1,PRKCE,SPTBN2,BCR,AFAP1,CD2AP,CDC42BPB,FMN1,CYFIP1
GO:0046578	4.44199e-08	4.88703	4.64587	20	188	regulation of Ras protein signal transduction	1.28485e-05	ENSG00000100485,ENSG00000107263,ENSG00000107862,ENSG00000111348,ENSG00000113916,ENSG00000126217,ENSG00000131089,ENSG00000136158,ENSG00000137486,ENSG00000138193,ENSG00000139132,ENSG00000145715,ENSG00000159842,ENSG00000164056,ENSG00000165895,ENSG00000170776,ENSG00000186716,ENSG00000196914,ENSG00000198399,ENSG00000198915	SOS2,RAPGEF1,GBF1,ARHGDIB,BCL6,MCF2L,ARHGEF9,SPRY2,ARRB1,PLCE1,FGD4,RASA1,ABR,SPRY1,ARHGAP42,AKAP13,BCR,ARHGEF12,ITSN2,RASGEF1A
GO:0007265	4.97893e-08	3.83027	7.58661	26	307	Ras protein signal transduction	1.35544e-05	ENSG00000100485,ENSG00000100852,ENSG00000107263,ENSG00000107862,ENSG00000111348,ENSG00000113916,ENSG00000116133,ENSG00000116574,ENSG00000126217,ENSG00000131089,ENSG00000136158,ENSG00000137486,ENSG00000138193,ENSG00000139132,ENSG00000145715,ENSG00000151491,ENSG00000158195,ENSG00000159842,ENSG00000164056,ENSG00000165895,ENSG00000170776,ENSG00000186716,ENSG00000196914,ENSG00000198399,ENSG00000198915…	SOS2,ARHGAP5,RAPGEF1,GBF1,ARHGDIB,BCL6,DHCR24,RHOU,MCF2L,ARHGEF9,SPRY2,ARRB1,PLCE1,FGD4,RASA1,EPS8,WASF2,ABR,SPRY1,ARHGAP42,AKAP13,BCR,ARHGEF12,ITSN2,RASGEF1A,CYFIP1
GO:0010646	5.45666e-08	1.87015	72.4806	116	2933	regulation of cell communication	1.40297e-05	ENSG00000051382,ENSG00000058091,ENSG00000072062,ENSG00000075711,ENSG00000080561,ENSG00000082196,ENSG00000085832,ENSG00000088888,ENSG00000089163,ENSG00000100485,ENSG00000100852,ENSG00000102471,ENSG00000103429,ENSG00000105738,ENSG00000106052,ENSG00000106069,ENSG00000107263,ENSG00000107731,ENSG00000107816,ENSG00000107862,ENSG00000108389,ENSG00000110330,ENSG00000111199,ENSG00000111348,ENSG00000111846…	PIK3CB,CDK14,PRKACA,DLG1,MID2,C1QTNF3,EPS15,MAVS,SIRT4,SOS2,ARHGAP5,NDFIP2,BFAR,SIPA1L3,TAX1BP1,CHN2,RAPGEF1,UNC5B,LZTS2,GBF1,MTMR4,BIRC2,TRPV4,ARHGDIB,GCNT2,ERBB2IP,BCL6,STAM2,IL1R1,RAB3GAP1,RHOU,APAF1,TRIM6,PIK3CA,NCOA3,VAMP7,MCF2L,DYRK2,MACF1,APOL3,SLC44A2,SEC14L1,ARHGEF9,TRAF7,PER2,PRKAA1,NUMB,KIDINS220,ARHGAP32,TAOK3,FAIM2,SPRY2,STXBP1,ARRB1,IFT172,PPM1B,PLCE1,BMPR1B,FGD4,GIT2,PELI2,MINK1,ER…
GO:0030029	6.38236e-08	2.82109	15.7416	40	637	actin filament-based process	1.50601e-05	ENSG00000006747,ENSG00000046604,ENSG00000075711,ENSG00000100242,ENSG00000100592,ENSG00000106078,ENSG00000106299,ENSG00000106789,ENSG00000108946,ENSG00000111199,ENSG00000111348,ENSG00000113916,ENSG00000116574,ENSG00000120756,ENSG00000137486,ENSG00000138594,ENSG00000139132,ENSG00000140463,ENSG00000141298,ENSG00000141503,ENSG00000145715,ENSG00000145819,ENSG00000151422,ENSG00000151491,ENSG00000154639…	SCIN,DSG2,DLG1,SUN2,DAAM1,COBL,WASL,CORO2A,PRKAR1A,TRPV4,ARHGDIB,BCL6,RHOU,PLS1,ARRB1,TMOD3,FGD4,BBS4,SSH2,MINK1,RASA1,ARHGAP26,FER,EPS8,CXADR,NCK1,WASF2,EPB41,ABR,ALOX15,ARFIP1,TSC1,AKAP13,PRKCE,SPTBN2,BCR,CD2AP,CDC42BPB,FMN1,CYFIP1
GO:0007264	6.50823e-08	2.95137	13.9129	37	563	small GTPase mediated signal transduction	1.50601e-05	ENSG00000100485,ENSG00000100852,ENSG00000105738,ENSG00000106069,ENSG00000107263,ENSG00000107862,ENSG00000108774,ENSG00000111348,ENSG00000113916,ENSG00000116133,ENSG00000116574,ENSG00000119396,ENSG00000126217,ENSG00000131089,ENSG00000134909,ENSG00000136158,ENSG00000136237,ENSG00000137486,ENSG00000138193,ENSG00000139132,ENSG00000144840,ENSG00000145715,ENSG00000145819,ENSG00000150760,ENSG00000151491…	SOS2,ARHGAP5,SIPA1L3,CHN2,RAPGEF1,GBF1,RAB5C,ARHGDIB,BCL6,DHCR24,RHOU,RAB14,MCF2L,ARHGEF9,ARHGAP32,SPRY2,RAPGEF5,ARRB1,PLCE1,FGD4,RABL3,RASA1,ARHGAP26,DOCK1,EPS8,WASF2,ABR,SPRY1,ARHGAP42,AKAP13,RAB43,BCR,ARHGEF12,ITSN2,RASGEF1A,CYFIP1,ARHGAP23
GO:0033036	7.62104e-08	1.87999	67.9335	110	2749	macromolecule localization	1.61043e-05	ENSG00000006747,ENSG00000008952,ENSG00000021762,ENSG00000025796,ENSG00000026950,ENSG00000062725,ENSG00000068912,ENSG00000072062,ENSG00000073734,ENSG00000073969,ENSG00000075711,ENSG00000080561,ENSG00000082196,ENSG00000085832,ENSG00000088888,ENSG00000089163,ENSG00000092330,ENSG00000100242,ENSG00000100280,ENSG00000100439,ENSG00000102471,ENSG00000102910,ENSG00000106299,ENSG00000107816,ENSG00000107862…	SCIN,SEC62,OSBPL5,SEC63,BTN3A1,APPBP2,ERLEC1,PRKACA,ABCB11,NSF,DLG1,MID2,C1QTNF3,EPS15,MAVS,SIRT4,TINF2,SUN2,AP1B1,ABHD4,NDFIP2,LONP2,WASL,LZTS2,GBF1,TBC1D12,RAB5C,TRPV4,ERBB2IP,COL4A3BP,SEC24A,BCL6,USP4,ACAP2,STAM2,SNX17,CHMP3,RAB3GAP1,DHCR24,RHOU,KDM5B,ESYT2,ANKRD13C,RAB14,VPS4B,AFTPH,PLS1,TRIM6,VAMP7,BBS2,DYRK2,MACF1,APOL3,LDLR,CLIP1,PER2,FLOT2,NUMB,TMED7,PNPLA8,IGF2BP3,STXBP1,ARRB1,PPM1B,FBLN…
GO:0051345	7.65545e-08	2.49169	22.3397	50	904	positive regulation of hydrolase activity	1.61043e-05	ENSG00000008086,ENSG00000077232,ENSG00000100485,ENSG00000100852,ENSG00000105738,ENSG00000106069,ENSG00000107185,ENSG00000107263,ENSG00000107862,ENSG00000108239,ENSG00000111348,ENSG00000114331,ENSG00000115839,ENSG00000120868,ENSG00000126217,ENSG00000130396,ENSG00000131089,ENSG00000134909,ENSG00000136237,ENSG00000137486,ENSG00000138193,ENSG00000139132,ENSG00000139436,ENSG00000141736,ENSG00000145715…	CDKL5,DNAJC10,SOS2,ARHGAP5,SIPA1L3,CHN2,RGP1,RAPGEF1,GBF1,TBC1D12,ARHGDIB,ACAP2,RAB3GAP1,APAF1,MCF2L,MLLT4,ARHGEF9,ARHGAP32,RAPGEF5,ARRB1,PLCE1,FGD4,GIT2,ERBB2,RASA1,ARHGAP26,DOCK1,ASAP2,NCK1,ABR,JAK1,TSC1,ARHGAP42,TBC1D2B,AKAP13,PRKCE,EIF2AK3,SPTBN2,DENND4A,SNX18,BCR,DAPK1,ARHGEF12,MAP3K5,ASPH,ITSN2,RUNDC1,RASGEF1A,TBC1D8,ARHGAP23
GO:0035556	1.61892e-07	1.87264	63.9549	104	2588	intracellular signal transduction	3.25756e-05	ENSG00000005882,ENSG00000051382,ENSG00000052795,ENSG00000071242,ENSG00000072062,ENSG00000075711,ENSG00000077232,ENSG00000078687,ENSG00000080561,ENSG00000082196,ENSG00000088888,ENSG00000100485,ENSG00000100852,ENSG00000102471,ENSG00000105738,ENSG00000106069,ENSG00000106789,ENSG00000107263,ENSG00000107731,ENSG00000107862,ENSG00000108774,ENSG00000108946,ENSG00000110330,ENSG00000111199,ENSG00000111348…	PDK2,PIK3CB,FNIP2,RPS6KA2,PRKACA,DLG1,DNAJC10,TNRC6C,MID2,C1QTNF3,MAVS,SOS2,ARHGAP5,NDFIP2,SIPA1L3,CHN2,CORO2A,RAPGEF1,UNC5B,GBF1,RAB5C,PRKAR1A,BIRC2,TRPV4,ARHGDIB,GCNT2,ERBB2IP,BCL6,DHCR24,RHOU,TJP2,RAB14,APAF1,PIK3CA,MCF2L,DYRK2,APOL3,SLC44A2,SEC14L1,ARHGEF9,TRAF7,PRKAA1,PIK3C2B,KIDINS220,ARHGAP32,TAOK3,SPRY2,RAPGEF5,ARRB1,PPM1B,PLCE1,FGD4,PELI2,MINK1,ERBB2,PI4KB,LIMD1,RABL3,RASA1,ARHGAP26,IGFB…
GO:0008104	2.50189e-07	1.88621	58.7901	97	2379	protein localization	4.80524e-05	ENSG00000006747,ENSG00000008952,ENSG00000025796,ENSG00000026950,ENSG00000062725,ENSG00000068912,ENSG00000072062,ENSG00000073969,ENSG00000075711,ENSG00000080561,ENSG00000082196,ENSG00000085832,ENSG00000088888,ENSG00000089163,ENSG00000092330,ENSG00000100242,ENSG00000100280,ENSG00000102471,ENSG00000102910,ENSG00000106299,ENSG00000107816,ENSG00000107862,ENSG00000108239,ENSG00000108774,ENSG00000111199…	SCIN,SEC62,SEC63,BTN3A1,APPBP2,ERLEC1,PRKACA,NSF,DLG1,MID2,C1QTNF3,EPS15,MAVS,SIRT4,TINF2,SUN2,AP1B1,NDFIP2,LONP2,WASL,LZTS2,GBF1,TBC1D12,RAB5C,TRPV4,ERBB2IP,SEC24A,BCL6,USP4,ACAP2,STAM2,SNX17,CHMP3,RAB3GAP1,DHCR24,RHOU,ANKRD13C,RAB14,VPS4B,AFTPH,PLS1,TRIM6,VAMP7,BBS2,DYRK2,MACF1,CLIP1,PER2,FLOT2,NUMB,TMED7,STXBP1,ARRB1,PPM1B,FBLN5,BBS4,VPS53,ERBB2,GOLPH3L,EXOC6B,VPS26B,PTPRN2,RAB11FIP1,MORC3,ITG…
GO:0009966	2.59574e-07	1.84658	65.3882	105	2646	regulation of signal transduction	4.80524e-05	ENSG00000051382,ENSG00000058091,ENSG00000072062,ENSG00000075711,ENSG00000080561,ENSG00000082196,ENSG00000085832,ENSG00000088888,ENSG00000100485,ENSG00000100852,ENSG00000102471,ENSG00000103429,ENSG00000105738,ENSG00000106052,ENSG00000106069,ENSG00000107263,ENSG00000107731,ENSG00000107816,ENSG00000107862,ENSG00000108389,ENSG00000110330,ENSG00000111199,ENSG00000111348,ENSG00000111846,ENSG00000112851…	PIK3CB,CDK14,PRKACA,DLG1,MID2,C1QTNF3,EPS15,MAVS,SOS2,ARHGAP5,NDFIP2,BFAR,SIPA1L3,TAX1BP1,CHN2,RAPGEF1,UNC5B,LZTS2,GBF1,MTMR4,BIRC2,TRPV4,ARHGDIB,GCNT2,ERBB2IP,BCL6,STAM2,IL1R1,RHOU,APAF1,TRIM6,PIK3CA,NCOA3,MCF2L,DYRK2,MACF1,APOL3,SLC44A2,SEC14L1,ARHGEF9,TRAF7,PRKAA1,NUMB,KIDINS220,ARHGAP32,TAOK3,FAIM2,SPRY2,ARRB1,IFT172,PPM1B,PLCE1,BMPR1B,FGD4,GIT2,PELI2,MINK1,ERBB2,PRKACB,LIMD1,RASA1,ARHGAP26,I…
GO:0051336	4.34641e-07	2.12884	32.9659	63	1334	regulation of hydrolase activity	7.73661e-05	ENSG00000008086,ENSG00000077232,ENSG00000084234,ENSG00000100485,ENSG00000100665,ENSG00000100852,ENSG00000105738,ENSG00000106069,ENSG00000107185,ENSG00000107263,ENSG00000107862,ENSG00000108239,ENSG00000110330,ENSG00000111348,ENSG00000113916,ENSG00000114331,ENSG00000115839,ENSG00000116133,ENSG00000116678,ENSG00000120868,ENSG00000126217,ENSG00000130396,ENSG00000131089,ENSG00000134909,ENSG00000136158…	CDKL5,DNAJC10,APLP2,SOS2,SERPINA4,ARHGAP5,SIPA1L3,CHN2,RGP1,RAPGEF1,GBF1,TBC1D12,BIRC2,ARHGDIB,BCL6,ACAP2,RAB3GAP1,DHCR24,LEPR,APAF1,MCF2L,MLLT4,ARHGEF9,ARHGAP32,SPRY2,RAPGEF5,ARRB1,PLCE1,FGD4,GIT2,BBS4,ERBB2,RASA1,ARHGAP26,DOCK1,CRIM1,ASAP2,PTPRN2,NCK1,ABR,JAK1,SPRY1,TSC1,ARHGAP42,TBC1D2B,AKAP13,PRKCE,EIF2AK3,SPTBN2,DENND4A,RPS6KA3,SNX18,BCR,DAPK1,ARHGEF12,MAP3K5,ASPH,ITSN2,RUNDC1,RASGEF1A,TBC1D…
GO:0051716	5.17213e-07	1.6379	166.955	216	6756	cellular response to stimulus	8.86541e-05	ENSG00000004799,ENSG00000005882,ENSG00000008952,ENSG00000011021,ENSG00000019186,ENSG00000025796,ENSG00000026950,ENSG00000048052,ENSG00000051382,ENSG00000052795,ENSG00000058091,ENSG00000064201,ENSG00000068912,ENSG00000071242,ENSG00000072062,ENSG00000075223,ENSG00000075711,ENSG00000077157,ENSG00000077232,ENSG00000078687,ENSG00000080561,ENSG00000082196,ENSG00000084234,ENSG00000085117,ENSG00000085832…	PDK4,PDK2,SEC62,CLCN6,CYP24A1,SEC63,BTN3A1,HDAC9,PIK3CB,FNIP2,CDK14,TSPAN32,ERLEC1,RPS6KA2,PRKACA,SEMA3C,DLG1,PPP1R12B,DNAJC10,TNRC6C,MID2,C1QTNF3,APLP2,CD82,EPS15,MAVS,SIRT4,GABRP,MTMR3,SOS2,DAAM1,ARHGAP5,NDFIP2,DNAJC3,PARP4,BFAR,SIPA1L3,ITGB8,TAX1BP1,CHN2,WASL,CORO2A,RAPGEF1,UNC5B,LZTS2,GBF1,MTMR4,RAB5C,PRKAR1A,INPP4B,DTX4,IL10RA,BIRC2,TRPV4,ARHGDIB,VDR,GCNT2,ERBB2IP,COL4A3BP,LNPEP,BCL6,KAT2B,A…
GO:0051128	6.01028e-07	1.88054	54.2183	90	2194	regulation of cellular component organization	9.93414e-05	ENSG00000006747,ENSG00000008086,ENSG00000051382,ENSG00000052795,ENSG00000071242,ENSG00000072062,ENSG00000075223,ENSG00000075711,ENSG00000088888,ENSG00000089163,ENSG00000092330,ENSG00000100330,ENSG00000106078,ENSG00000106299,ENSG00000107263,ENSG00000108239,ENSG00000108774,ENSG00000108946,ENSG00000110324,ENSG00000110330,ENSG00000111199,ENSG00000111348,ENSG00000113916,ENSG00000115234,ENSG00000115561…	SCIN,CDKL5,PIK3CB,FNIP2,RPS6KA2,PRKACA,SEMA3C,DLG1,MAVS,SIRT4,TINF2,MTMR3,COBL,WASL,RAPGEF1,TBC1D12,RAB5C,PRKAR1A,IL10RA,BIRC2,TRPV4,ARHGDIB,BCL6,SNX17,CHMP3,RAB3GAP1,RHOU,VPS4B,PLS1,APAF1,VAMP7,MACF1,CLIP1,NUMB,KIDINS220,SPRY2,STXBP1,ARRB1,PLCE1,TMOD3,FGD4,FBLN5,BBS4,SSH2,ERBB2,LIMD1,RASA1,FBXO38,IGFBP3,DOCK1,PIP4K2A,CRIM1,FER,EPS8,NCK1,WASF2,CUL4B,SYNJ1,ABR,ITGB2,VPS11,ALOX15,PDLIM5,ARFIP1,BRWD…
GO:0050794	7.31677e-07	1.68803	250.333	297	10130	regulation of cellular process	0.000116766	ENSG00000004799,ENSG00000005882,ENSG00000006468,ENSG00000006747,ENSG00000007237,ENSG00000008086,ENSG00000008952,ENSG00000011021,ENSG00000019186,ENSG00000025796,ENSG00000026950,ENSG00000046604,ENSG00000048052,ENSG00000051382,ENSG00000052795,ENSG00000055609,ENSG00000058091,ENSG00000064201,ENSG00000068912,ENSG00000071242,ENSG00000072062,ENSG00000073969,ENSG00000075223,ENSG00000075711,ENSG00000076108…	PDK4,PDK2,ETV1,SCIN,GAS7,CDKL5,SEC62,CLCN6,CYP24A1,SEC63,BTN3A1,DSG2,HDAC9,PIK3CB,FNIP2,KMT2C,CDK14,TSPAN32,ERLEC1,RPS6KA2,PRKACA,NSF,SEMA3C,DLG1,BAZ2A,PPP1R12B,DNAJC10,TNRC6C,MID2,C1QTNF3,APLP2,CD82,EPS15,MAVS,SIRT4,TINF2,GABRP,SUN2,AP1B1,MTMR3,SOS2,DAAM1,SERPINA4,ARHGAP5,NDFIP2,DNAJC3,LONP2,BFAR,SIPA1L3,ITGB8,TAX1BP1,CHN2,COBL,WASL,CORO2A,KDM4C,RGP1,RAPGEF1,UNC5B,LZTS2,GBF1,ZMIZ1,TBC1D12,MTMR4,…
GO:0043085	1.22348e-06	2.00382	37.7601	68	1528	positive regulation of catalytic activity	0.000188743	ENSG00000008086,ENSG00000051382,ENSG00000072062,ENSG00000075711,ENSG00000077157,ENSG00000077232,ENSG00000100485,ENSG00000100852,ENSG00000105738,ENSG00000106069,ENSG00000107185,ENSG00000107263,ENSG00000107862,ENSG00000108239,ENSG00000108946,ENSG00000111348,ENSG00000111424,ENSG00000114331,ENSG00000115839,ENSG00000120868,ENSG00000121879,ENSG00000126217,ENSG00000130396,ENSG00000131089,ENSG00000131653…	CDKL5,PIK3CB,PRKACA,DLG1,PPP1R12B,DNAJC10,SOS2,ARHGAP5,SIPA1L3,CHN2,RGP1,RAPGEF1,GBF1,TBC1D12,PRKAR1A,ARHGDIB,VDR,ACAP2,RAB3GAP1,APAF1,PIK3CA,MCF2L,MLLT4,ARHGEF9,TRAF7,PRKAA1,KIDINS220,ARHGAP32,TAOK3,SPRY2,RAPGEF5,ARRB1,PLCE1,FGD4,GIT2,GNAL,ERBB2,PRKACB,RASA1,ARHGAP26,IGFBP3,DOCK1,ASAP2,TAB3,NCK1,ABR,JAK1,TSC1,ARHGAP42,TBC1D2B,PARM1,AKAP13,PRKCE,EIF2AK3,SPTBN2,DENND4A,SNX18,BCR,DAPK1,ARHGEF12,MAP…
GO:0051258	1.54341e-06	3.82558	5.78263	20	234	protein polymerization	0.000230416	ENSG00000006747,ENSG00000075711,ENSG00000106078,ENSG00000106299,ENSG00000111199,ENSG00000115561,ENSG00000121236,ENSG00000130779,ENSG00000138594,ENSG00000140463,ENSG00000145715,ENSG00000151422,ENSG00000151491,ENSG00000158092,ENSG00000161905,ENSG00000164144,ENSG00000171132,ENSG00000173898,ENSG00000248905,ENSG00000273749	SCIN,DLG1,COBL,WASL,TRPV4,CHMP3,TRIM6,CLIP1,TMOD3,BBS4,RASA1,FER,EPS8,NCK1,ALOX15,ARFIP1,PRKCE,SPTBN2,FMN1,CYFIP1
GO:0071702	1.79096e-06	1.77753	63.856	100	2584	organic substance transport	0.000259017	ENSG00000008952,ENSG00000021762,ENSG00000025796,ENSG00000026950,ENSG00000062725,ENSG00000068912,ENSG00000072062,ENSG00000073734,ENSG00000073969,ENSG00000082196,ENSG00000085832,ENSG00000088888,ENSG00000089163,ENSG00000100280,ENSG00000102471,ENSG00000102910,ENSG00000107862,ENSG00000108239,ENSG00000108774,ENSG00000111199,ENSG00000112851,ENSG00000113163,ENSG00000113615,ENSG00000113916,ENSG00000115145…	SEC62,OSBPL5,SEC63,BTN3A1,APPBP2,ERLEC1,PRKACA,ABCB11,NSF,C1QTNF3,EPS15,MAVS,SIRT4,AP1B1,NDFIP2,LONP2,GBF1,TBC1D12,RAB5C,TRPV4,ERBB2IP,COL4A3BP,SEC24A,BCL6,STAM2,SNX17,CHMP3,RAB3GAP1,SLC25A12,RHOU,KDM5B,PIK3R3,ESYT2,RAB14,VPS4B,AFTPH,PLS1,TRIM6,VAMP7,BBS2,DYRK2,MACF1,APOL3,LDLR,CLIP1,PER2,PRKAA1,TMED7,PNPLA8,IGF2BP3,STXBP1,SLC22A23,ARRB1,PPM1B,BBS4,VPS53,ERBB2,GOLPH3L,EXOC6B,GULP1,VPS26B,DISP1,PT…
GO:0051641	2.02344e-06	1.79347	59.8774	95	2423	cellular localization	0.000281464	ENSG00000006747,ENSG00000008952,ENSG00000025796,ENSG00000062725,ENSG00000068912,ENSG00000072062,ENSG00000073969,ENSG00000075711,ENSG00000077380,ENSG00000080561,ENSG00000082196,ENSG00000085832,ENSG00000088888,ENSG00000089163,ENSG00000092330,ENSG00000100242,ENSG00000100280,ENSG00000102910,ENSG00000104133,ENSG00000106299,ENSG00000107185,ENSG00000107816,ENSG00000107862,ENSG00000108239,ENSG00000112851…	SCIN,SEC62,SEC63,APPBP2,ERLEC1,PRKACA,NSF,DLG1,DYNC1I2,MID2,C1QTNF3,EPS15,MAVS,SIRT4,TINF2,SUN2,AP1B1,LONP2,SPG11,WASL,RGP1,LZTS2,GBF1,TBC1D12,ERBB2IP,COL4A3BP,SEC24A,BCL6,USP4,ACAP2,STAM2,SNX17,CHMP3,RAB3GAP1,RHOU,ANKRD13C,RAB14,VPS4B,AFTPH,PLS1,VAMP7,BBS2,DYRK2,MACF1,CLIP1,PER2,FLOT2,NUMB,TMED7,SPRY2,STXBP1,ARRB1,PPM1B,FBLN5,BBS4,VPS53,ERBB2,HYOU1,FER,VPS26B,PTPRN2,SYNJ1,MORC3,ITGB2,MCM3AP,VPS1…
GO:0065009	2.0678e-06	1.74748	69.095	106	2796	regulation of molecular function	0.000281464	ENSG00000008086,ENSG00000051382,ENSG00000072062,ENSG00000075711,ENSG00000077157,ENSG00000077232,ENSG00000080561,ENSG00000084234,ENSG00000088888,ENSG00000089163,ENSG00000092330,ENSG00000100485,ENSG00000100665,ENSG00000100852,ENSG00000102471,ENSG00000102580,ENSG00000105738,ENSG00000106052,ENSG00000106069,ENSG00000106299,ENSG00000107185,ENSG00000107263,ENSG00000107862,ENSG00000108239,ENSG00000108946…	CDKL5,PIK3CB,PRKACA,DLG1,PPP1R12B,DNAJC10,MID2,APLP2,MAVS,SIRT4,TINF2,SOS2,SERPINA4,ARHGAP5,NDFIP2,DNAJC3,SIPA1L3,TAX1BP1,CHN2,WASL,RGP1,RAPGEF1,GBF1,TBC1D12,PRKAR1A,BIRC2,ARHGDIB,VDR,ERBB2IP,BCL6,KAT2B,ACAP2,RAB3GAP1,DHCR24,LEPR,PIK3R3,APAF1,TRIM6,PIK3CA,NCOA3,MCF2L,MLLT4,ARHGEF9,TRAF7,PER2,PRKAA1,KIDINS220,ARHGAP32,TAOK3,SPRY2,RAPGEF5,ARRB1,PLCE1,FGD4,GIT2,BBS4,GNAL,MINK1,ERBB2,PRKACB,CTTNBP2NL…
GO:0030041	2.28149e-06	4.52189	3.95393	16	160	actin filament polymerization	0.000301678	ENSG00000006747,ENSG00000075711,ENSG00000106078,ENSG00000106299,ENSG00000138594,ENSG00000140463,ENSG00000145715,ENSG00000151422,ENSG00000151491,ENSG00000158092,ENSG00000161905,ENSG00000164144,ENSG00000171132,ENSG00000173898,ENSG00000248905,ENSG00000273749	SCIN,DLG1,COBL,WASL,TMOD3,BBS4,RASA1,FER,EPS8,NCK1,ALOX15,ARFIP1,PRKCE,SPTBN2,FMN1,CYFIP1
GO:0008064	2.91337e-06	4.42878	4.02807	16	163	regulation of actin polymerization or depolymerization	0.000371079	ENSG00000006747,ENSG00000075711,ENSG00000106299,ENSG00000138594,ENSG00000140463,ENSG00000141298,ENSG00000145715,ENSG00000151422,ENSG00000151491,ENSG00000158092,ENSG00000161905,ENSG00000164144,ENSG00000171132,ENSG00000173898,ENSG00000248905,ENSG00000273749	SCIN,DLG1,WASL,TMOD3,BBS4,SSH2,RASA1,FER,EPS8,NCK1,ALOX15,ARFIP1,PRKCE,SPTBN2,FMN1,CYFIP1
GO:1902531	2.9996e-06	1.9197	41.0715	71	1662	regulation of intracellular signal transduction	0.000371079	ENSG00000051382,ENSG00000072062,ENSG00000075711,ENSG00000080561,ENSG00000082196,ENSG00000088888,ENSG00000100485,ENSG00000100852,ENSG00000102471,ENSG00000105738,ENSG00000106069,ENSG00000107263,ENSG00000107731,ENSG00000107862,ENSG00000110330,ENSG00000111199,ENSG00000111348,ENSG00000111846,ENSG00000112851,ENSG00000113916,ENSG00000116574,ENSG00000121879,ENSG00000126217,ENSG00000127334,ENSG00000128284…	PIK3CB,PRKACA,DLG1,MID2,C1QTNF3,MAVS,SOS2,ARHGAP5,NDFIP2,SIPA1L3,CHN2,RAPGEF1,UNC5B,GBF1,BIRC2,TRPV4,ARHGDIB,GCNT2,ERBB2IP,BCL6,RHOU,PIK3CA,MCF2L,DYRK2,APOL3,SLC44A2,SEC14L1,ARHGEF9,TRAF7,PRKAA1,KIDINS220,ARHGAP32,TAOK3,SPRY2,ARRB1,PPM1B,PLCE1,FGD4,PELI2,MINK1,ERBB2,LIMD1,RASA1,ARHGAP26,IGFBP3,HYOU1,PIP4K2A,FOXO1,CNKSR3,DEPTOR,TAB3,NCK1,ABR,ALOX15,SPRY1,TSC1,ARHGAP42,AKAP13,MTM1,PRKCE,EIF2AK3,BCR…
GO:0030833	3.09556e-06	4.68804	3.58325	15	145	regulation of actin filament polymerization	0.000371079	ENSG00000006747,ENSG00000075711,ENSG00000106299,ENSG00000138594,ENSG00000140463,ENSG00000145715,ENSG00000151422,ENSG00000151491,ENSG00000158092,ENSG00000161905,ENSG00000164144,ENSG00000171132,ENSG00000173898,ENSG00000248905,ENSG00000273749	SCIN,DLG1,WASL,TMOD3,BBS4,RASA1,FER,EPS8,NCK1,ALOX15,ARFIP1,PRKCE,SPTBN2,FMN1,CYFIP1
GO:0030832	3.15651e-06	4.39858	4.05278	16	164	regulation of actin filament length	0.000371079	ENSG00000006747,ENSG00000075711,ENSG00000106299,ENSG00000138594,ENSG00000140463,ENSG00000141298,ENSG00000145715,ENSG00000151422,ENSG00000151491,ENSG00000158092,ENSG00000161905,ENSG00000164144,ENSG00000171132,ENSG00000173898,ENSG00000248905,ENSG00000273749	SCIN,DLG1,WASL,TMOD3,BBS4,SSH2,RASA1,FER,EPS8,NCK1,ALOX15,ARFIP1,PRKCE,SPTBN2,FMN1,CYFIP1
GO:0035023	3.20725e-06	5.42901	2.71833	13	110	regulation of Rho protein signal transduction	0.000371079	ENSG00000100485,ENSG00000111348,ENSG00000113916,ENSG00000126217,ENSG00000131089,ENSG00000137486,ENSG00000139132,ENSG00000159842,ENSG00000165895,ENSG00000170776,ENSG00000186716,ENSG00000196914,ENSG00000198399	SOS2,ARHGDIB,BCL6,MCF2L,ARHGEF9,ARRB1,FGD4,ABR,ARHGAP42,AKAP13,BCR,ARHGEF12,ITSN2
GO:0044093	3.98159e-06	1.8716	44.5559	75	1803	positive regulation of molecular function	0.000449434	ENSG00000008086,ENSG00000051382,ENSG00000072062,ENSG00000075711,ENSG00000077157,ENSG00000077232,ENSG00000080561,ENSG00000088888,ENSG00000100485,ENSG00000100852,ENSG00000105738,ENSG00000106069,ENSG00000107185,ENSG00000107263,ENSG00000107862,ENSG00000108239,ENSG00000108946,ENSG00000111348,ENSG00000111424,ENSG00000114331,ENSG00000115839,ENSG00000120868,ENSG00000121236,ENSG00000121879,ENSG00000124151…	CDKL5,PIK3CB,PRKACA,DLG1,PPP1R12B,DNAJC10,MID2,MAVS,SOS2,ARHGAP5,SIPA1L3,CHN2,RGP1,RAPGEF1,GBF1,TBC1D12,PRKAR1A,ARHGDIB,VDR,ACAP2,RAB3GAP1,APAF1,TRIM6,PIK3CA,NCOA3,MCF2L,MLLT4,ARHGEF9,TRAF7,PRKAA1,KIDINS220,ARHGAP32,TAOK3,SPRY2,RAPGEF5,ARRB1,PLCE1,FGD4,GIT2,GNAL,ERBB2,PRKACB,RASA1,ARHGAP26,IGFBP3,DOCK1,FER,ASAP2,TAB3,NCK1,EPB41,ABR,ITGB2,JAK1,TSC1,ARHGAP42,TBC1D2B,PARM1,AKAP13,PRKCE,EIF2AK3,SPTBN…
GO:0008154	4.10598e-06	4.07342	4.62116	17	187	actin polymerization or depolymerization	0.00045244	ENSG00000006747,ENSG00000075711,ENSG00000106078,ENSG00000106299,ENSG00000138594,ENSG00000140463,ENSG00000141298,ENSG00000145715,ENSG00000151422,ENSG00000151491,ENSG00000158092,ENSG00000161905,ENSG00000164144,ENSG00000171132,ENSG00000173898,ENSG00000248905,ENSG00000273749	SCIN,DLG1,COBL,WASL,TMOD3,BBS4,SSH2,RASA1,FER,EPS8,NCK1,ALOX15,ARFIP1,PRKCE,SPTBN2,FMN1,CYFIP1
GO:0032535	4.27239e-06	3.12097	8.40211	24	340	regulation of cellular component size	0.000459828	ENSG00000006747,ENSG00000008086,ENSG00000011021,ENSG00000075223,ENSG00000075711,ENSG00000106299,ENSG00000111199,ENSG00000120756,ENSG00000127603,ENSG00000138594,ENSG00000140463,ENSG00000141298,ENSG00000145715,ENSG00000151422,ENSG00000151491,ENSG00000155792,ENSG00000158092,ENSG00000161905,ENSG00000164144,ENSG00000165699,ENSG00000171132,ENSG00000173898,ENSG00000248905,ENSG00000273749	SCIN,CDKL5,CLCN6,SEMA3C,DLG1,WASL,TRPV4,PLS1,MACF1,TMOD3,BBS4,SSH2,RASA1,FER,EPS8,DEPTOR,NCK1,ALOX15,ARFIP1,TSC1,PRKCE,SPTBN2,FMN1,CYFIP1
GO:1902578	4.95119e-06	1.70046	72.1099	108	2918	single-organism localization	0.000512993	ENSG00000006747,ENSG00000008952,ENSG00000021762,ENSG00000025796,ENSG00000026950,ENSG00000051382,ENSG00000072062,ENSG00000073734,ENSG00000073969,ENSG00000075711,ENSG00000082196,ENSG00000084234,ENSG00000088888,ENSG00000089163,ENSG00000100242,ENSG00000100665,ENSG00000102910,ENSG00000104133,ENSG00000106299,ENSG00000111199,ENSG00000111424,ENSG00000113163,ENSG00000113615,ENSG00000113916,ENSG00000115561…	SCIN,SEC62,OSBPL5,SEC63,BTN3A1,PIK3CB,PRKACA,ABCB11,NSF,DLG1,C1QTNF3,APLP2,MAVS,SIRT4,SUN2,SERPINA4,LONP2,SPG11,WASL,TRPV4,VDR,COL4A3BP,SEC24A,BCL6,CHMP3,RAB3GAP1,SLC25A12,LEPR,KDM5B,PIK3R3,ESYT2,ANKRD13C,RAB14,VPS4B,PLS1,TRIM6,PIK3CA,VAMP7,BBS2,DYRK2,MACF1,APOL3,LDLR,CLIP1,PER2,PRKAA1,FLOT2,NUMB,PNPLA8,SPRY2,STXBP1,ARRB1,PPM1B,FBLN5,SLC12A6,BBS4,ERBB2,GOLPH3L,EXOC6B,GULP1,TMCO3,DOCK1,FER,CXADR,P…
GO:0044087	4.98804e-06	2.33435	18.6823	40	756	regulation of cellular component biogenesis	0.000512993	ENSG00000006747,ENSG00000052795,ENSG00000072062,ENSG00000075711,ENSG00000100330,ENSG00000106078,ENSG00000106299,ENSG00000107263,ENSG00000108239,ENSG00000110330,ENSG00000115839,ENSG00000119541,ENSG00000127603,ENSG00000130779,ENSG00000132356,ENSG00000136854,ENSG00000138594,ENSG00000140463,ENSG00000141298,ENSG00000145715,ENSG00000150867,ENSG00000151422,ENSG00000151491,ENSG00000158092,ENSG00000158195…	SCIN,FNIP2,PRKACA,DLG1,MTMR3,COBL,WASL,RAPGEF1,TBC1D12,BIRC2,RAB3GAP1,VPS4B,MACF1,CLIP1,PRKAA1,STXBP1,TMOD3,BBS4,SSH2,RASA1,PIP4K2A,FER,EPS8,NCK1,WASF2,CUL4B,VPS11,ALOX15,PDLIM5,ARFIP1,TSC1,MECP2,AKAP13,MTM1,PRKCE,SPTBN2,SEPT9,UNC13B,FMN1,CYFIP1
GO:0050790	5.13352e-06	1.76951	57.0355	90	2308	regulation of catalytic activity	0.000516477	ENSG00000008086,ENSG00000051382,ENSG00000072062,ENSG00000075711,ENSG00000077157,ENSG00000077232,ENSG00000084234,ENSG00000089163,ENSG00000092330,ENSG00000100485,ENSG00000100665,ENSG00000100852,ENSG00000102580,ENSG00000105738,ENSG00000106069,ENSG00000106299,ENSG00000107185,ENSG00000107263,ENSG00000107862,ENSG00000108239,ENSG00000108946,ENSG00000110330,ENSG00000111348,ENSG00000111424,ENSG00000113916…	CDKL5,PIK3CB,PRKACA,DLG1,PPP1R12B,DNAJC10,APLP2,SIRT4,TINF2,SOS2,SERPINA4,ARHGAP5,DNAJC3,SIPA1L3,CHN2,WASL,RGP1,RAPGEF1,GBF1,TBC1D12,PRKAR1A,BIRC2,ARHGDIB,VDR,BCL6,KAT2B,ACAP2,RAB3GAP1,DHCR24,LEPR,PIK3R3,APAF1,PIK3CA,MCF2L,MLLT4,ARHGEF9,TRAF7,PRKAA1,KIDINS220,ARHGAP32,TAOK3,SPRY2,RAPGEF5,ARRB1,PLCE1,FGD4,GIT2,BBS4,GNAL,ERBB2,PRKACB,RASA1,ARHGAP26,IGFBP3,DOCK1,CRIM1,ASAP2,PTPRN2,DEPTOR,TAB3,NCK1,A…
GO:0090066	5.289e-06	2.74162	11.5158	29	466	regulation of anatomical structure size	0.000520798	ENSG00000006747,ENSG00000008086,ENSG00000011021,ENSG00000075223,ENSG00000075711,ENSG00000106299,ENSG00000111199,ENSG00000120756,ENSG00000125124,ENSG00000127603,ENSG00000132326,ENSG00000138594,ENSG00000140463,ENSG00000141298,ENSG00000145715,ENSG00000151422,ENSG00000151491,ENSG00000155792,ENSG00000158092,ENSG00000161905,ENSG00000164144,ENSG00000165699,ENSG00000165895,ENSG00000171132,ENSG00000173482…	SCIN,CDKL5,CLCN6,SEMA3C,DLG1,WASL,TRPV4,PLS1,BBS2,MACF1,PER2,TMOD3,BBS4,SSH2,RASA1,FER,EPS8,DEPTOR,NCK1,ALOX15,ARFIP1,TSC1,ARHGAP42,PRKCE,PTPRM,SPTBN2,FMN1,CYFIP1,ADRA2B
GO:0006464	5.682e-06	1.63536	92.3738	131	3738	cellular protein modification process	0.000531623	ENSG00000004799,ENSG00000005882,ENSG00000008086,ENSG00000048052,ENSG00000051382,ENSG00000052795,ENSG00000055609,ENSG00000058091,ENSG00000071242,ENSG00000072062,ENSG00000075711,ENSG00000076108,ENSG00000077232,ENSG00000080561,ENSG00000088888,ENSG00000089163,ENSG00000092330,ENSG00000100271,ENSG00000100330,ENSG00000100897,ENSG00000101846,ENSG00000102158,ENSG00000102471,ENSG00000102580,ENSG00000102699…	PDK4,PDK2,CDKL5,HDAC9,PIK3CB,FNIP2,KMT2C,CDK14,RPS6KA2,PRKACA,DLG1,BAZ2A,DNAJC10,MID2,MAVS,SIRT4,TINF2,TTLL1,MTMR3,DCAF11,STS,MAGT1,NDFIP2,DNAJC3,PARP4,BFAR,TUSC3,KDM4C,RAPGEF1,MTMR4,PRKAR1A,DTX4,BIRC2,TRPV4,SUDS3,GCNT2,COL4A3BP,LNPEP,BCL6,KAT2B,USP4,GALNT3,EFEMP1,RAB3GAP1,EDEM3,KDM5B,MUC5B,TRIM6,PIK3CA,NCOA3,DYRK2,MGAT3,TRAF7,PER2,PRKAA1,MKRN1,KIDINS220,TAOK3,USP30,SPRY2,SETDB2,GALNT5,ARRB1,PPM1…
GO:0036211	5.682e-06	1.63536	92.3738	131	3738	protein modification process	0.000531623	ENSG00000004799,ENSG00000005882,ENSG00000008086,ENSG00000048052,ENSG00000051382,ENSG00000052795,ENSG00000055609,ENSG00000058091,ENSG00000071242,ENSG00000072062,ENSG00000075711,ENSG00000076108,ENSG00000077232,ENSG00000080561,ENSG00000088888,ENSG00000089163,ENSG00000092330,ENSG00000100271,ENSG00000100330,ENSG00000100897,ENSG00000101846,ENSG00000102158,ENSG00000102471,ENSG00000102580,ENSG00000102699…	PDK4,PDK2,CDKL5,HDAC9,PIK3CB,FNIP2,KMT2C,CDK14,RPS6KA2,PRKACA,DLG1,BAZ2A,DNAJC10,MID2,MAVS,SIRT4,TINF2,TTLL1,MTMR3,DCAF11,STS,MAGT1,NDFIP2,DNAJC3,PARP4,BFAR,TUSC3,KDM4C,RAPGEF1,MTMR4,PRKAR1A,DTX4,BIRC2,TRPV4,SUDS3,GCNT2,COL4A3BP,LNPEP,BCL6,KAT2B,USP4,GALNT3,EFEMP1,RAB3GAP1,EDEM3,KDM5B,MUC5B,TRIM6,PIK3CA,NCOA3,DYRK2,MGAT3,TRAF7,PER2,PRKAA1,MKRN1,KIDINS220,TAOK3,USP30,SPRY2,SETDB2,GALNT5,ARRB1,PPM1…
GO:0045184	5.8519e-06	1.82228	48.238	79	1952	establishment of protein localization	0.000531623	ENSG00000008952,ENSG00000025796,ENSG00000026950,ENSG00000062725,ENSG00000068912,ENSG00000072062,ENSG00000073969,ENSG00000075711,ENSG00000082196,ENSG00000085832,ENSG00000088888,ENSG00000089163,ENSG00000100280,ENSG00000102471,ENSG00000102910,ENSG00000107862,ENSG00000108239,ENSG00000108774,ENSG00000111199,ENSG00000112851,ENSG00000113615,ENSG00000113916,ENSG00000115145,ENSG00000115234,ENSG00000115561…	SEC62,SEC63,BTN3A1,APPBP2,ERLEC1,PRKACA,NSF,DLG1,C1QTNF3,EPS15,MAVS,SIRT4,AP1B1,NDFIP2,LONP2,GBF1,TBC1D12,RAB5C,TRPV4,ERBB2IP,SEC24A,BCL6,STAM2,SNX17,CHMP3,RAB3GAP1,RHOU,RAB14,VPS4B,AFTPH,PLS1,TRIM6,VAMP7,BBS2,DYRK2,MACF1,CLIP1,PER2,FLOT2,TMED7,STXBP1,ARRB1,PPM1B,BBS4,VPS53,ERBB2,GOLPH3L,EXOC6B,VPS26B,PTPRN2,RAB11FIP1,MCM3AP,VPS11,ARFIP1,STXBP4,AP1G1,TBC1D2B,MYO5B,AHCYL1,TMED10,CD14,KCNS3,MTM1,PR…
GO:0032271	5.85842e-06	4.17094	4.25048	16	172	regulation of protein polymerization	0.000531623	ENSG00000006747,ENSG00000075711,ENSG00000106299,ENSG00000130779,ENSG00000138594,ENSG00000140463,ENSG00000145715,ENSG00000151422,ENSG00000151491,ENSG00000158092,ENSG00000161905,ENSG00000164144,ENSG00000171132,ENSG00000173898,ENSG00000248905,ENSG00000273749	SCIN,DLG1,WASL,CLIP1,TMOD3,BBS4,RASA1,FER,EPS8,NCK1,ALOX15,ARFIP1,PRKCE,SPTBN2,FMN1,CYFIP1
GO:0032956	7.95901e-06	3.27949	6.99352	21	283	regulation of actin cytoskeleton organization	0.000708352	ENSG00000006747,ENSG00000075711,ENSG00000106299,ENSG00000111348,ENSG00000138594,ENSG00000140463,ENSG00000141298,ENSG00000145715,ENSG00000151422,ENSG00000151491,ENSG00000158092,ENSG00000158195,ENSG00000161905,ENSG00000164144,ENSG00000165699,ENSG00000170776,ENSG00000171132,ENSG00000173898,ENSG00000198087,ENSG00000248905,ENSG00000273749	SCIN,DLG1,WASL,ARHGDIB,TMOD3,BBS4,SSH2,RASA1,FER,EPS8,NCK1,WASF2,ALOX15,ARFIP1,TSC1,AKAP13,PRKCE,SPTBN2,CD2AP,FMN1,CYFIP1
GO:0051493	9.06758e-06	2.83008	9.98369	26	404	regulation of cytoskeleton organization	0.000791788	ENSG00000006747,ENSG00000075711,ENSG00000106299,ENSG00000111199,ENSG00000111348,ENSG00000115561,ENSG00000119541,ENSG00000130779,ENSG00000138594,ENSG00000140463,ENSG00000141298,ENSG00000145715,ENSG00000151422,ENSG00000151491,ENSG00000158092,ENSG00000158195,ENSG00000161905,ENSG00000164144,ENSG00000165699,ENSG00000170776,ENSG00000171132,ENSG00000173898,ENSG00000196526,ENSG00000198087,ENSG00000248905…	SCIN,DLG1,WASL,TRPV4,ARHGDIB,CHMP3,VPS4B,CLIP1,TMOD3,BBS4,SSH2,RASA1,FER,EPS8,NCK1,WASF2,ALOX15,ARFIP1,TSC1,AKAP13,PRKCE,SPTBN2,AFAP1,CD2AP,FMN1,CYFIP1
GO:0034613	9.58802e-06	1.88669	38.5262	66	1559	cellular protein localization	0.000821728	ENSG00000006747,ENSG00000008952,ENSG00000025796,ENSG00000062725,ENSG00000068912,ENSG00000072062,ENSG00000073969,ENSG00000075711,ENSG00000080561,ENSG00000082196,ENSG00000088888,ENSG00000089163,ENSG00000092330,ENSG00000100242,ENSG00000100280,ENSG00000102910,ENSG00000106299,ENSG00000107816,ENSG00000107862,ENSG00000108239,ENSG00000112851,ENSG00000113615,ENSG00000113916,ENSG00000114316,ENSG00000114331…	SCIN,SEC62,SEC63,APPBP2,ERLEC1,PRKACA,NSF,DLG1,MID2,C1QTNF3,MAVS,SIRT4,TINF2,SUN2,AP1B1,LONP2,WASL,LZTS2,GBF1,TBC1D12,ERBB2IP,SEC24A,BCL6,USP4,ACAP2,STAM2,SNX17,RAB3GAP1,RHOU,ANKRD13C,PLS1,VAMP7,BBS2,DYRK2,MACF1,CLIP1,FLOT2,NUMB,STXBP1,PPM1B,FBLN5,BBS4,ERBB2,VPS26B,MORC3,ITGB2,MCM3AP,VPS11,PIGR,ARFIP1,STXBP4,AP1G1,TBC1D2B,AHCYL1,TMED10,EIF2AK3,PACS1,SNX18,SRPR,CD2AP,RUNDC1,SREBF2,BAG6,TBC1D8,OTUD…
GO:0070727	1.20362e-05	1.87149	38.798	66	1570	cellular macromolecule localization	0.00100145	ENSG00000006747,ENSG00000008952,ENSG00000025796,ENSG00000062725,ENSG00000068912,ENSG00000072062,ENSG00000073969,ENSG00000075711,ENSG00000080561,ENSG00000082196,ENSG00000088888,ENSG00000089163,ENSG00000092330,ENSG00000100242,ENSG00000100280,ENSG00000102910,ENSG00000106299,ENSG00000107816,ENSG00000107862,ENSG00000108239,ENSG00000112851,ENSG00000113615,ENSG00000113916,ENSG00000114316,ENSG00000114331…	SCIN,SEC62,SEC63,APPBP2,ERLEC1,PRKACA,NSF,DLG1,MID2,C1QTNF3,MAVS,SIRT4,TINF2,SUN2,AP1B1,LONP2,WASL,LZTS2,GBF1,TBC1D12,ERBB2IP,SEC24A,BCL6,USP4,ACAP2,STAM2,SNX17,RAB3GAP1,RHOU,ANKRD13C,PLS1,VAMP7,BBS2,DYRK2,MACF1,CLIP1,FLOT2,NUMB,STXBP1,PPM1B,FBLN5,BBS4,ERBB2,VPS26B,MORC3,ITGB2,MCM3AP,VPS11,PIGR,ARFIP1,STXBP4,AP1G1,TBC1D2B,AHCYL1,TMED10,EIF2AK3,PACS1,SNX18,SRPR,CD2AP,RUNDC1,SREBF2,BAG6,TBC1D8,OTUD…
GO:0015031	1.21178e-05	1.818	44.3582	73	1795	protein transport	0.00100145	ENSG00000008952,ENSG00000025796,ENSG00000026950,ENSG00000062725,ENSG00000068912,ENSG00000072062,ENSG00000073969,ENSG00000082196,ENSG00000085832,ENSG00000088888,ENSG00000089163,ENSG00000100280,ENSG00000102471,ENSG00000102910,ENSG00000107862,ENSG00000108239,ENSG00000108774,ENSG00000111199,ENSG00000112851,ENSG00000113615,ENSG00000113916,ENSG00000115145,ENSG00000115234,ENSG00000115561,ENSG00000116574…	SEC62,SEC63,BTN3A1,APPBP2,ERLEC1,PRKACA,NSF,C1QTNF3,EPS15,MAVS,SIRT4,AP1B1,NDFIP2,LONP2,GBF1,TBC1D12,RAB5C,TRPV4,ERBB2IP,SEC24A,BCL6,STAM2,SNX17,CHMP3,RHOU,RAB14,VPS4B,AFTPH,TRIM6,VAMP7,BBS2,DYRK2,MACF1,CLIP1,PER2,TMED7,STXBP1,ARRB1,PPM1B,BBS4,VPS53,ERBB2,GOLPH3L,EXOC6B,VPS26B,PTPRN2,RAB11FIP1,MCM3AP,VPS11,ARFIP1,STXBP4,AP1G1,TBC1D2B,MYO5B,AHCYL1,TMED10,CD14,KCNS3,MTM1,PRKCE,EIF2AK3,ZMAT3,PACS1,S…
GO:0044765	1.23939e-05	1.68393	66.7226	100	2700	single-organism transport	0.0010063	ENSG00000006747,ENSG00000008952,ENSG00000021762,ENSG00000025796,ENSG00000026950,ENSG00000051382,ENSG00000072062,ENSG00000073734,ENSG00000073969,ENSG00000082196,ENSG00000084234,ENSG00000088888,ENSG00000089163,ENSG00000100242,ENSG00000100665,ENSG00000102910,ENSG00000104133,ENSG00000106299,ENSG00000111199,ENSG00000111424,ENSG00000113163,ENSG00000113615,ENSG00000113916,ENSG00000115561,ENSG00000115839…	SCIN,SEC62,OSBPL5,SEC63,BTN3A1,PIK3CB,PRKACA,ABCB11,NSF,C1QTNF3,APLP2,MAVS,SIRT4,SUN2,SERPINA4,LONP2,SPG11,WASL,TRPV4,VDR,COL4A3BP,SEC24A,BCL6,CHMP3,RAB3GAP1,SLC25A12,LEPR,KDM5B,PIK3R3,ESYT2,RAB14,VPS4B,PLS1,TRIM6,PIK3CA,VAMP7,BBS2,DYRK2,MACF1,APOL3,LDLR,CLIP1,PER2,PRKAA1,PNPLA8,STXBP1,ARRB1,PPM1B,FBLN5,SLC12A6,BBS4,ERBB2,GOLPH3L,EXOC6B,GULP1,TMCO3,DOCK1,FER,CXADR,PTPRN2,SLC7A7,RAB11FIP1,NCK1,WAS…
GO:0032970	1.39978e-05	3.05285	7.83373	22	317	regulation of actin filament-based process	0.00111693	ENSG00000006747,ENSG00000046604,ENSG00000075711,ENSG00000106299,ENSG00000111348,ENSG00000138594,ENSG00000140463,ENSG00000141298,ENSG00000145715,ENSG00000151422,ENSG00000151491,ENSG00000158092,ENSG00000158195,ENSG00000161905,ENSG00000164144,ENSG00000165699,ENSG00000170776,ENSG00000171132,ENSG00000173898,ENSG00000198087,ENSG00000248905,ENSG00000273749	SCIN,DSG2,DLG1,WASL,ARHGDIB,TMOD3,BBS4,SSH2,RASA1,FER,EPS8,NCK1,WASF2,ALOX15,ARFIP1,TSC1,AKAP13,PRKCE,SPTBN2,CD2AP,FMN1,CYFIP1
GO:0050789	1.53776e-05	1.58774	263.233	303	10652	regulation of biological process	0.00120623	ENSG00000001561,ENSG00000004799,ENSG00000005882,ENSG00000006468,ENSG00000006747,ENSG00000007237,ENSG00000008086,ENSG00000008952,ENSG00000011021,ENSG00000019186,ENSG00000025796,ENSG00000026950,ENSG00000046604,ENSG00000048052,ENSG00000051382,ENSG00000052795,ENSG00000055609,ENSG00000058091,ENSG00000064201,ENSG00000068912,ENSG00000071242,ENSG00000072062,ENSG00000073969,ENSG00000075223,ENSG00000075711…	ENPP4,PDK4,PDK2,ETV1,SCIN,GAS7,CDKL5,SEC62,CLCN6,CYP24A1,SEC63,BTN3A1,DSG2,HDAC9,PIK3CB,FNIP2,KMT2C,CDK14,TSPAN32,ERLEC1,RPS6KA2,PRKACA,NSF,SEMA3C,DLG1,BAZ2A,PPP1R12B,DNAJC10,TNRC6C,MID2,C1QTNF3,APLP2,CD82,EPS15,MAVS,SIRT4,TINF2,GABRP,SUN2,AP1B1,MTMR3,SOS2,DAAM1,SERPINA4,ARHGAP5,NDFIP2,DNAJC3,LONP2,BFAR,SIPA1L3,ITGB8,TAX1BP1,CHN2,COBL,WASL,CORO2A,KDM4C,RGP1,RAPGEF1,UNC5B,LZTS2,GBF1,ZMIZ1,TBC1D12,…
GO:0007169	1.62298e-05	2.34192	16.1864	35	655	transmembrane receptor protein tyrosine kinase signaling pathway	0.00125186	ENSG00000004799,ENSG00000005882,ENSG00000051382,ENSG00000085832,ENSG00000106299,ENSG00000107263,ENSG00000112851,ENSG00000115145,ENSG00000115339,ENSG00000115380,ENSG00000117461,ENSG00000119396,ENSG00000121879,ENSG00000136158,ENSG00000138193,ENSG00000141736,ENSG00000145715,ENSG00000146674,ENSG00000150760,ENSG00000150907,ENSG00000150938,ENSG00000151422,ENSG00000151491,ENSG00000158092,ENSG00000158195…	PDK4,PDK2,PIK3CB,EPS15,WASL,RAPGEF1,ERBB2IP,STAM2,GALNT3,EFEMP1,PIK3R3,RAB14,PIK3CA,SPRY2,PLCE1,ERBB2,RASA1,IGFBP3,DOCK1,FOXO1,CRIM1,FER,EPS8,NCK1,WASF2,JAK1,PIGR,SPRY1,TSC1,STXBP4,EIF2AK3,BCR,MBD5,CYFIP1,ADRA2B
GO:0007015	1.87227e-05	2.99087	7.98201	22	323	actin filament organization	0.00142047	ENSG00000006747,ENSG00000075711,ENSG00000106078,ENSG00000106299,ENSG00000111199,ENSG00000120756,ENSG00000137486,ENSG00000138594,ENSG00000140463,ENSG00000141298,ENSG00000145715,ENSG00000151422,ENSG00000151491,ENSG00000158092,ENSG00000158195,ENSG00000161905,ENSG00000164144,ENSG00000165699,ENSG00000171132,ENSG00000173898,ENSG00000248905,ENSG00000273749	SCIN,DLG1,COBL,WASL,TRPV4,PLS1,ARRB1,TMOD3,BBS4,SSH2,RASA1,FER,EPS8,NCK1,WASF2,ALOX15,ARFIP1,TSC1,PRKCE,SPTBN2,FMN1,CYFIP1
GO:0007266	2.31849e-05	4.13971	3.73153	14	151	Rho protein signal transduction	0.00173064	ENSG00000100485,ENSG00000100852,ENSG00000111348,ENSG00000113916,ENSG00000126217,ENSG00000131089,ENSG00000137486,ENSG00000139132,ENSG00000159842,ENSG00000165895,ENSG00000170776,ENSG00000186716,ENSG00000196914,ENSG00000198399	SOS2,ARHGAP5,ARHGDIB,BCL6,MCF2L,ARHGEF9,ARRB1,FGD4,ABR,ARHGAP42,AKAP13,BCR,ARHGEF12,ITSN2
GO:0034976	2.65363e-05	3.21351	6.42514	19	260	response to endoplasmic reticulum stress	0.00194936	ENSG00000008952,ENSG00000025796,ENSG00000068912,ENSG00000077232,ENSG00000102580,ENSG00000103429,ENSG00000113163,ENSG00000116406,ENSG00000120868,ENSG00000149428,ENSG00000155313,ENSG00000158092,ENSG00000161905,ENSG00000172071,ENSG00000182158,ENSG00000182934,ENSG00000197442,ENSG00000198380,ENSG00000204463	SEC62,SEC63,ERLEC1,DNAJC10,DNAJC3,BFAR,COL4A3BP,EDEM3,APAF1,HYOU1,USP25,NCK1,ALOX15,EIF2AK3,CREB3L2,SRPR,MAP3K5,GFPT1,BAG6
GO:0006909	2.73748e-05	3.33087	5.88148	18	238	phagocytosis	0.00196631	ENSG00000051382,ENSG00000106299,ENSG00000116678,ENSG00000119396,ENSG00000121879,ENSG00000124333,ENSG00000144366,ENSG00000150760,ENSG00000158092,ENSG00000158195,ENSG00000159842,ENSG00000160255,ENSG00000161905,ENSG00000170458,ENSG00000171132,ENSG00000186716,ENSG00000198959,ENSG00000273749	PIK3CB,WASL,LEPR,RAB14,PIK3CA,VAMP7,GULP1,DOCK1,NCK1,WASF2,ABR,ITGB2,ALOX15,CD14,PRKCE,BCR,TGM2,CYFIP1
GO:0051649	2.76167e-05	1.74903	47.892	76	1938	establishment of localization in cell	0.00196631	ENSG00000008952,ENSG00000025796,ENSG00000062725,ENSG00000068912,ENSG00000072062,ENSG00000073969,ENSG00000075711,ENSG00000077380,ENSG00000082196,ENSG00000085832,ENSG00000088888,ENSG00000089163,ENSG00000100242,ENSG00000100280,ENSG00000102910,ENSG00000104133,ENSG00000106299,ENSG00000107185,ENSG00000107816,ENSG00000107862,ENSG00000108239,ENSG00000112851,ENSG00000113163,ENSG00000113615,ENSG00000113916…	SEC62,SEC63,APPBP2,ERLEC1,PRKACA,NSF,DLG1,DYNC1I2,C1QTNF3,EPS15,MAVS,SIRT4,SUN2,AP1B1,LONP2,SPG11,WASL,RGP1,LZTS2,GBF1,TBC1D12,ERBB2IP,COL4A3BP,SEC24A,BCL6,STAM2,SNX17,CHMP3,RAB3GAP1,RHOU,RAB14,VPS4B,AFTPH,VAMP7,BBS2,DYRK2,CLIP1,PER2,TMED7,SPRY2,STXBP1,ARRB1,PPM1B,BBS4,VPS53,ERBB2,HYOU1,FER,VPS26B,PTPRN2,SYNJ1,MCM3AP,VPS11,SPRY1,ARFIP1,NEMF,TSC1,STXBP4,AP1G1,TBC1D2B,AHCYL1,TMED10,AKAP13,MTM1,PRKC…
GO:0048518	3.34303e-05	1.51976	125.883	164	5094	positive regulation of biological process	0.00234417	ENSG00000001561,ENSG00000006468,ENSG00000006747,ENSG00000008086,ENSG00000026950,ENSG00000048052,ENSG00000051382,ENSG00000052795,ENSG00000071242,ENSG00000072062,ENSG00000073969,ENSG00000075223,ENSG00000075711,ENSG00000078687,ENSG00000080561,ENSG00000082196,ENSG00000085832,ENSG00000088888,ENSG00000089163,ENSG00000092330,ENSG00000100242,ENSG00000100485,ENSG00000102471,ENSG00000102580,ENSG00000105855…	ENPP4,ETV1,SCIN,CDKL5,BTN3A1,HDAC9,PIK3CB,FNIP2,RPS6KA2,PRKACA,NSF,SEMA3C,DLG1,TNRC6C,MID2,C1QTNF3,EPS15,MAVS,SIRT4,TINF2,SUN2,SOS2,NDFIP2,DNAJC3,ITGB8,CHN2,COBL,WASL,KDM4C,RAPGEF1,UNC5B,ZMIZ1,RAI1,PRKAR1A,BIRC2,TRPV4,VDR,SUDS3,GCNT2,ERBB2IP,SEC24A,BCL6,KAT2B,CHMP3,IL1R1,RAB3GAP1,RHOU,KDM5B,PIK3R3,VPS4B,IRF2BPL,HOXB5,PLS1,APAF1,TRIM6,PIK3CA,NCOA3,VAMP7,BBS2,MCF2L,HIVEP3,DYRK2,MACF1,APOL3,SLC44A2,…
GO:0006897	3.61067e-05	2.30445	15.4451	33	625	endocytosis	0.00246481	ENSG00000051382,ENSG00000085832,ENSG00000106299,ENSG00000108774,ENSG00000113282,ENSG00000115234,ENSG00000116678,ENSG00000117868,ENSG00000119396,ENSG00000121879,ENSG00000124333,ENSG00000130164,ENSG00000137486,ENSG00000138131,ENSG00000143393,ENSG00000144366,ENSG00000149428,ENSG00000150760,ENSG00000158092,ENSG00000158195,ENSG00000159082,ENSG00000159842,ENSG00000160255,ENSG00000161905,ENSG00000170458…	PIK3CB,EPS15,WASL,RAB5C,CLINT1,SNX17,LEPR,ESYT2,RAB14,PIK3CA,VAMP7,LDLR,ARRB1,LOXL4,PI4KB,GULP1,HYOU1,DOCK1,NCK1,WASF2,SYNJ1,ABR,ITGB2,ALOX15,CD14,PRKCE,SNX18,BCR,CD2AP,ITSN2,TGM2,CYFIP1,SYNRG
GO:0043412	3.62159e-05	1.55319	98.4777	134	3985	macromolecule modification	0.00246481	ENSG00000004799,ENSG00000005882,ENSG00000008086,ENSG00000048052,ENSG00000051382,ENSG00000052795,ENSG00000055609,ENSG00000058091,ENSG00000071242,ENSG00000072062,ENSG00000075711,ENSG00000076108,ENSG00000077232,ENSG00000080561,ENSG00000088888,ENSG00000089163,ENSG00000092330,ENSG00000100271,ENSG00000100330,ENSG00000100897,ENSG00000101846,ENSG00000102158,ENSG00000102471,ENSG00000102580,ENSG00000102699…	PDK4,PDK2,CDKL5,HDAC9,PIK3CB,FNIP2,KMT2C,CDK14,RPS6KA2,PRKACA,DLG1,BAZ2A,DNAJC10,MID2,MAVS,SIRT4,TINF2,TTLL1,MTMR3,DCAF11,STS,MAGT1,NDFIP2,DNAJC3,PARP4,BFAR,TUSC3,KDM4C,RAPGEF1,MTMR4,PRKAR1A,DTX4,BIRC2,TRPV4,SUDS3,GCNT2,COL4A3BP,LNPEP,BCL6,KAT2B,USP4,GALNT3,EFEMP1,RAB3GAP1,EDEM3,KDM5B,MUC5B,TRIM6,PIK3CA,NCOA3,DYRK2,MGAT3,TRAF7,PER2,PRKAA1,MKRN1,KIDINS220,TAOK3,USP30,SPRY2,SETDB2,GALNT5,ARRB1,PPM1…
GO:0060627	3.75126e-05	2.64259	10.2061	25	413	regulation of vesicle-mediated transport	0.00251606	ENSG00000051382,ENSG00000073969,ENSG00000106299,ENSG00000108239,ENSG00000108774,ENSG00000115234,ENSG00000115561,ENSG00000115839,ENSG00000119541,ENSG00000124333,ENSG00000132356,ENSG00000136854,ENSG00000137486,ENSG00000151422,ENSG00000159842,ENSG00000160695,ENSG00000161905,ENSG00000166747,ENSG00000167202,ENSG00000170458,ENSG00000186716,ENSG00000198087,ENSG00000198722,ENSG00000198863,ENSG00000204634	PIK3CB,NSF,WASL,TBC1D12,RAB5C,SNX17,CHMP3,RAB3GAP1,VPS4B,VAMP7,PRKAA1,STXBP1,ARRB1,FER,ABR,VPS11,ALOX15,AP1G1,TBC1D2B,CD14,BCR,CD2AP,UNC13B,RUNDC1,TBC1D8
GO:0048522	3.82292e-05	1.52887	113.181	150	4580	positive regulation of cellular process	0.0025275	ENSG00000006468,ENSG00000006747,ENSG00000008086,ENSG00000048052,ENSG00000051382,ENSG00000052795,ENSG00000071242,ENSG00000072062,ENSG00000073969,ENSG00000075223,ENSG00000075711,ENSG00000078687,ENSG00000080561,ENSG00000082196,ENSG00000085832,ENSG00000088888,ENSG00000092330,ENSG00000100242,ENSG00000100485,ENSG00000102471,ENSG00000102580,ENSG00000106069,ENSG00000106078,ENSG00000106299,ENSG00000107077…	ETV1,SCIN,CDKL5,HDAC9,PIK3CB,FNIP2,RPS6KA2,PRKACA,NSF,SEMA3C,DLG1,TNRC6C,MID2,C1QTNF3,EPS15,MAVS,TINF2,SUN2,SOS2,NDFIP2,DNAJC3,CHN2,COBL,WASL,KDM4C,RAPGEF1,UNC5B,ZMIZ1,RAI1,PRKAR1A,BIRC2,TRPV4,VDR,SUDS3,GCNT2,SEC24A,BCL6,KAT2B,CHMP3,IL1R1,RAB3GAP1,RHOU,KDM5B,PIK3R3,VPS4B,IRF2BPL,HOXB5,PLS1,APAF1,TRIM6,PIK3CA,NCOA3,VAMP7,MCF2L,HIVEP3,DYRK2,MACF1,APOL3,SLC44A2,LDLR,CLIP1,ARHGEF9,TRAF7,PRKAA1,FLOT2,…
GO:0033043	4.20331e-05	2.01658	24.1437	45	977	regulation of organelle organization	0.00273985	ENSG00000006747,ENSG00000071242,ENSG00000075711,ENSG00000088888,ENSG00000089163,ENSG00000092330,ENSG00000100330,ENSG00000106299,ENSG00000108239,ENSG00000108946,ENSG00000111199,ENSG00000111348,ENSG00000115561,ENSG00000115839,ENSG00000116574,ENSG00000119541,ENSG00000130779,ENSG00000136854,ENSG00000138594,ENSG00000140463,ENSG00000141298,ENSG00000145715,ENSG00000150867,ENSG00000151422,ENSG00000151491…	SCIN,RPS6KA2,DLG1,MAVS,SIRT4,TINF2,MTMR3,WASL,TBC1D12,PRKAR1A,TRPV4,ARHGDIB,CHMP3,RAB3GAP1,RHOU,VPS4B,CLIP1,STXBP1,TMOD3,BBS4,SSH2,RASA1,PIP4K2A,FER,EPS8,NCK1,WASF2,SYNJ1,VPS11,ALOX15,ARFIP1,TSC1,TBC1D2B,AKAP13,MTM1,PRKCE,SPTBN2,SEPT9,AFAP1,CD2AP,RUNDC1,SREBF2,TBC1D8,FMN1,CYFIP1
GO:0071310	4.53321e-05	1.69344	52.7356	81	2134	cellular response to organic substance	0.00285412	ENSG00000004799,ENSG00000005882,ENSG00000008952,ENSG00000019186,ENSG00000025796,ENSG00000048052,ENSG00000071242,ENSG00000072062,ENSG00000088888,ENSG00000102580,ENSG00000103429,ENSG00000106052,ENSG00000107263,ENSG00000108389,ENSG00000108946,ENSG00000110324,ENSG00000110330,ENSG00000111424,ENSG00000111846,ENSG00000112851,ENSG00000114166,ENSG00000114331,ENSG00000114698,ENSG00000115339,ENSG00000115594…	PDK4,PDK2,SEC62,CYP24A1,SEC63,HDAC9,RPS6KA2,PRKACA,MAVS,DNAJC3,BFAR,TAX1BP1,RAPGEF1,MTMR4,PRKAR1A,IL10RA,BIRC2,VDR,GCNT2,ERBB2IP,KAT2B,ACAP2,PLSCR4,GALNT3,IL1R1,EDEM3,LEPR,ETV3,KDM5B,PIK3R3,RAB14,CSF3R,APAF1,TRIM6,PIK3CA,NCOA3,BBS2,LDLR,PRKAA1,KIDINS220,SPRY2,ARRB1,BMPR1B,BBS4,ERBB2,PRKACB,HYOU1,FOXO1,THRB,FER,PTPRN2,NCK1,ITGB2,ALOX15,JAK1,SPRY1,CITED2,TSC1,STXBP4,IRF2,AHCYL1,SLC33A1,CD14,AKAP13,…
GO:0065007	4.5613e-05	1.56862	278.728	315	11279	biological regulation	0.00285412	ENSG00000001561,ENSG00000004799,ENSG00000005882,ENSG00000006468,ENSG00000006747,ENSG00000007237,ENSG00000008086,ENSG00000008952,ENSG00000011021,ENSG00000019186,ENSG00000025796,ENSG00000026950,ENSG00000046604,ENSG00000047457,ENSG00000048052,ENSG00000051382,ENSG00000052795,ENSG00000055609,ENSG00000058091,ENSG00000064201,ENSG00000068912,ENSG00000071242,ENSG00000072062,ENSG00000073969,ENSG00000075223…	ENPP4,PDK4,PDK2,ETV1,SCIN,GAS7,CDKL5,SEC62,CLCN6,CYP24A1,SEC63,BTN3A1,DSG2,CP,HDAC9,PIK3CB,FNIP2,KMT2C,CDK14,TSPAN32,ERLEC1,RPS6KA2,PRKACA,NSF,SEMA3C,DLG1,BAZ2A,PPP1R12B,DNAJC10,TNRC6C,MID2,C1QTNF3,APLP2,CD82,EPS15,MAVS,SIRT4,TINF2,GABRP,SUN2,AP1B1,MTMR3,ABHD4,SOS2,DAAM1,SERPINA4,ARHGAP5,NDFIP2,DNAJC3,LONP2,BFAR,SIPA1L3,ITGB8,TAX1BP1,CHN2,COBL,WASL,CORO2A,KDM4C,RGP1,RAPGEF1,UNC5B,LIPA,LZTS2,GBF1,…
GO:0008203	4.56364e-05	4.44523	2.99016	12	121	cholesterol metabolic process	0.00285412	ENSG00000001630,ENSG00000021762,ENSG00000067064,ENSG00000104549,ENSG00000115234,ENSG00000116133,ENSG00000116678,ENSG00000130164,ENSG00000132196,ENSG00000132356,ENSG00000160285,ENSG00000198911	CYP51A1,OSBPL5,IDI1,SQLE,SNX17,DHCR24,LEPR,LDLR,HSD17B7,PRKAA1,LSS,SREBF2
GO:0007173	6.28665e-05	4.28681	3.08901	12	125	epidermal growth factor receptor signaling pathway	0.00387928	ENSG00000085832,ENSG00000112851,ENSG00000115145,ENSG00000115380,ENSG00000121879,ENSG00000136158,ENSG00000138193,ENSG00000151422,ENSG00000151491,ENSG00000162896,ENSG00000164056,ENSG00000274286	EPS15,ERBB2IP,STAM2,EFEMP1,PIK3CA,SPRY2,PLCE1,FER,EPS8,PIGR,SPRY1,ADRA2B
GO:0046907	6.39112e-05	1.78151	38.5262	63	1559	intracellular transport	0.00389185	ENSG00000008952,ENSG00000025796,ENSG00000062725,ENSG00000068912,ENSG00000072062,ENSG00000073969,ENSG00000077380,ENSG00000082196,ENSG00000085832,ENSG00000088888,ENSG00000089163,ENSG00000100242,ENSG00000100280,ENSG00000102910,ENSG00000104133,ENSG00000106299,ENSG00000107185,ENSG00000107816,ENSG00000107862,ENSG00000108239,ENSG00000112851,ENSG00000113163,ENSG00000113615,ENSG00000113916,ENSG00000115145…	SEC62,SEC63,APPBP2,ERLEC1,PRKACA,NSF,DYNC1I2,C1QTNF3,EPS15,MAVS,SIRT4,SUN2,AP1B1,LONP2,SPG11,WASL,RGP1,LZTS2,GBF1,TBC1D12,ERBB2IP,COL4A3BP,SEC24A,BCL6,STAM2,SNX17,CHMP3,RHOU,RAB14,VPS4B,AFTPH,VAMP7,DYRK2,CLIP1,TMED7,PPM1B,BBS4,VPS53,ERBB2,HYOU1,FER,VPS26B,MCM3AP,VPS11,ARFIP1,NEMF,TSC1,STXBP4,AP1G1,TBC1D2B,AHCYL1,TMED10,AKAP13,MTM1,SPTBN2,PACS1,SNX18,CREB3L2,SRPR,RUNDC1,SREBF2,TBC1D8,SYNRG
GO:1902589	6.52296e-05	1.76513	40.1571	65	1625	single-organism organelle organization	0.00392055	ENSG00000006747,ENSG00000075711,ENSG00000100242,ENSG00000100271,ENSG00000100592,ENSG00000102910,ENSG00000106078,ENSG00000106299,ENSG00000106789,ENSG00000107816,ENSG00000107862,ENSG00000108239,ENSG00000108946,ENSG00000111199,ENSG00000111348,ENSG00000112851,ENSG00000113163,ENSG00000113916,ENSG00000115561,ENSG00000116574,ENSG00000119541,ENSG00000120756,ENSG00000124333,ENSG00000125124,ENSG00000130779…	SCIN,DLG1,SUN2,TTLL1,DAAM1,LONP2,COBL,WASL,CORO2A,LZTS2,GBF1,TBC1D12,PRKAR1A,TRPV4,ARHGDIB,ERBB2IP,COL4A3BP,BCL6,CHMP3,RHOU,VPS4B,PLS1,VAMP7,BBS2,CLIP1,USP30,SPRY2,STXBP1,ARRB1,IFT172,TMOD3,FGD4,BBS4,SSH2,MINK1,RASA1,ARHGAP26,FER,EPS8,CXADR,NCK1,WASF2,EPB41,ABR,VPS11,ALOX15,SPRY1,ARFIP1,TSC1,TBC1D2B,AKAP13,MTM1,MFN1,PRKCE,SPTBN2,VCPIP1,SEPT9,BCR,CD2AP,CDC42BPB,RUNDC1,SREBF2,TBC1D8,FMN1,CYFIP1
GO:0032273	6.78153e-05	4.61877	2.64419	11	107	positive regulation of protein polymerization	0.00398139	ENSG00000006747,ENSG00000075711,ENSG00000106299,ENSG00000130779,ENSG00000151422,ENSG00000158092,ENSG00000161905,ENSG00000164144,ENSG00000171132,ENSG00000248905,ENSG00000273749	SCIN,DLG1,WASL,CLIP1,FER,NCK1,ALOX15,ARFIP1,PRKCE,FMN1,CYFIP1
GO:1902652	6.79624e-05	4.24895	3.11372	12	126	secondary alcohol metabolic process	0.00398139	ENSG00000001630,ENSG00000021762,ENSG00000067064,ENSG00000104549,ENSG00000115234,ENSG00000116133,ENSG00000116678,ENSG00000130164,ENSG00000132196,ENSG00000132356,ENSG00000160285,ENSG00000198911	CYP51A1,OSBPL5,IDI1,SQLE,SNX17,DHCR24,LEPR,LDLR,HSD17B7,PRKAA1,LSS,SREBF2
GO:0038127	6.88238e-05	3.95068	3.60797	13	146	ERBB signaling pathway	0.00398146	ENSG00000085832,ENSG00000112851,ENSG00000115145,ENSG00000115380,ENSG00000121879,ENSG00000136158,ENSG00000138193,ENSG00000141736,ENSG00000151422,ENSG00000151491,ENSG00000162896,ENSG00000164056,ENSG00000274286	EPS15,ERBB2IP,STAM2,EFEMP1,PIK3CA,SPRY2,PLCE1,ERBB2,FER,EPS8,PIGR,SPRY1,ADRA2B
GO:0032870	7.04584e-05	2.28112	14.6048	31	591	cellular response to hormone stimulus	0.0040257	ENSG00000004799,ENSG00000005882,ENSG00000048052,ENSG00000072062,ENSG00000108946,ENSG00000111424,ENSG00000114166,ENSG00000116678,ENSG00000117461,ENSG00000121879,ENSG00000124151,ENSG00000125124,ENSG00000132356,ENSG00000140463,ENSG00000142875,ENSG00000150907,ENSG00000151090,ENSG00000151422,ENSG00000165699,ENSG00000166263,ENSG00000168710,ENSG00000170776,ENSG00000171132,ENSG00000175745,ENSG00000184634…	PDK4,PDK2,HDAC9,PRKACA,PRKAR1A,VDR,KAT2B,LEPR,PIK3R3,PIK3CA,NCOA3,BBS2,PRKAA1,BBS4,PRKACB,FOXO1,THRB,FER,TSC1,STXBP4,AHCYL1,AKAP13,PRKCE,NR2F1,MED12,SMYD3,SP1,PPARA,STRN3,KANK2,MBD5
GO:0051239	7.38994e-05	1.6176	63.6583	93	2576	regulation of multicellular organismal process	0.00417081	ENSG00000001561,ENSG00000004799,ENSG00000006747,ENSG00000008086,ENSG00000046604,ENSG00000048052,ENSG00000072062,ENSG00000075223,ENSG00000075711,ENSG00000077157,ENSG00000082196,ENSG00000088888,ENSG00000100592,ENSG00000106052,ENSG00000106078,ENSG00000107263,ENSG00000108389,ENSG00000108557,ENSG00000110042,ENSG00000110330,ENSG00000111199,ENSG00000111348,ENSG00000111424,ENSG00000111846,ENSG00000112851…	ENPP4,PDK4,SCIN,CDKL5,DSG2,HDAC9,PRKACA,SEMA3C,DLG1,PPP1R12B,C1QTNF3,MAVS,DAAM1,TAX1BP1,COBL,RAPGEF1,MTMR4,RAI1,DTX4,BIRC2,TRPV4,ARHGDIB,VDR,GCNT2,ERBB2IP,BCL6,EFEMP1,LEPR,KDM5B,CSF3R,PLS1,TRIM6,PIK3CA,NCOA3,VAMP7,BBS2,MACF1,SEC14L1,CLIP1,PER2,PRKAA1,NUMB,KIDINS220,IGF2BP3,ARRB1,PPM1B,PLCE1,BMPR1B,BBS4,SSH2,ERBB2,PRKACB,LIMD1,FBXO38,DOCK1,FOXO1,THRB,CXADR,RAB11FIP1,NCK1,ABR,ITGB2,JAK1,PDLIM5,PRIC…
GO:0010256	8.27801e-05	2.32892	13.3692	29	541	endomembrane system organization	0.00461574	ENSG00000073969,ENSG00000075711,ENSG00000100242,ENSG00000106299,ENSG00000107862,ENSG00000113163,ENSG00000114698,ENSG00000115145,ENSG00000115561,ENSG00000115839,ENSG00000119541,ENSG00000120756,ENSG00000124333,ENSG00000125124,ENSG00000127603,ENSG00000130779,ENSG00000132589,ENSG00000133961,ENSG00000136854,ENSG00000143457,ENSG00000159082,ENSG00000160695,ENSG00000170348,ENSG00000172071,ENSG00000172780…	NSF,DLG1,SUN2,WASL,GBF1,COL4A3BP,PLSCR4,STAM2,CHMP3,RAB3GAP1,VPS4B,PLS1,VAMP7,BBS2,MACF1,CLIP1,FLOT2,NUMB,STXBP1,GOLPH3L,SYNJ1,VPS11,TMED10,EIF2AK3,RAB43,VCPIP1,PACS1,ATL1,BAG6
GO:0030838	9.02624e-05	4.90778	2.27351	10	92	positive regulation of actin filament polymerization	0.00497303	ENSG00000006747,ENSG00000075711,ENSG00000106299,ENSG00000151422,ENSG00000158092,ENSG00000161905,ENSG00000164144,ENSG00000171132,ENSG00000248905,ENSG00000273749	SCIN,DLG1,WASL,FER,NCK1,ALOX15,ARFIP1,PRKCE,FMN1,CYFIP1
GO:0043254	9.90355e-05	2.64929	8.92107	22	361	regulation of protein complex assembly	0.00539219	ENSG00000006747,ENSG00000052795,ENSG00000075711,ENSG00000106299,ENSG00000110330,ENSG00000130779,ENSG00000136854,ENSG00000138594,ENSG00000140463,ENSG00000145715,ENSG00000151422,ENSG00000151491,ENSG00000158092,ENSG00000158290,ENSG00000160695,ENSG00000161905,ENSG00000164144,ENSG00000171132,ENSG00000173898,ENSG00000198722,ENSG00000248905,ENSG00000273749	SCIN,FNIP2,DLG1,WASL,BIRC2,CLIP1,STXBP1,TMOD3,BBS4,RASA1,FER,EPS8,NCK1,CUL4B,VPS11,ALOX15,ARFIP1,PRKCE,SPTBN2,UNC13B,FMN1,CYFIP1
GO:0010033	0.000106087	1.5858	67.7358	97	2741	response to organic substance	0.00570895	ENSG00000004799,ENSG00000005882,ENSG00000008952,ENSG00000019186,ENSG00000025796,ENSG00000046604,ENSG00000048052,ENSG00000068912,ENSG00000071242,ENSG00000072062,ENSG00000077232,ENSG00000088888,ENSG00000102580,ENSG00000102910,ENSG00000103429,ENSG00000104549,ENSG00000106052,ENSG00000107263,ENSG00000108389,ENSG00000108946,ENSG00000110324,ENSG00000110330,ENSG00000111199,ENSG00000111424,ENSG00000111846…	PDK4,PDK2,SEC62,CYP24A1,SEC63,DSG2,HDAC9,ERLEC1,RPS6KA2,PRKACA,DNAJC10,MAVS,DNAJC3,LONP2,BFAR,SQLE,TAX1BP1,RAPGEF1,MTMR4,PRKAR1A,IL10RA,BIRC2,TRPV4,VDR,GCNT2,ERBB2IP,KAT2B,ACAP2,PLSCR4,GALNT3,IL1R1,DHCR24,EDEM3,LEPR,ETV3,KDM5B,PIK3R3,RAB14,CSF3R,VPS4B,APAF1,TRIM6,PIK3CA,NCOA3,BBS2,LDLR,PRKAA1,KIDINS220,SPRY2,ARRB1,BMPR1B,BBS4,ERBB2,PRKACB,HYOU1,FOXO1,THRB,FER,EPS8,PTPRN2,USP25,NCK1,ABR,ITGB2,ALOX…
GO:0050896	0.000118296	1.45304	199.698	237	8081	response to stimulus	0.00629279	ENSG00000001561,ENSG00000004799,ENSG00000005882,ENSG00000006468,ENSG00000008952,ENSG00000011021,ENSG00000019186,ENSG00000025796,ENSG00000026950,ENSG00000046604,ENSG00000048052,ENSG00000051382,ENSG00000052795,ENSG00000058091,ENSG00000064201,ENSG00000068912,ENSG00000071242,ENSG00000072062,ENSG00000075223,ENSG00000075711,ENSG00000077157,ENSG00000077232,ENSG00000078687,ENSG00000080561,ENSG00000082196…	ENPP4,PDK4,PDK2,ETV1,SEC62,CLCN6,CYP24A1,SEC63,BTN3A1,DSG2,HDAC9,PIK3CB,FNIP2,CDK14,TSPAN32,ERLEC1,RPS6KA2,PRKACA,SEMA3C,DLG1,PPP1R12B,DNAJC10,TNRC6C,MID2,C1QTNF3,APLP2,CD82,EPS15,MAVS,SIRT4,CMTM6,GABRP,AP1B1,MTMR3,SOS2,DAAM1,ARHGAP5,NDFIP2,DNAJC3,PARP4,LONP2,BFAR,SQLE,SIPA1L3,ITGB8,TAX1BP1,CHN2,WASL,CORO2A,RAPGEF1,UNC5B,LIPA,LZTS2,GBF1,MTMR4,RAB5C,PRKAR1A,INPP4B,DTX4,IL10RA,BIRC2,TRPV4,ARHGDIB,V…
GO:0032989	0.000125302	1.85112	29.1356	50	1179	cellular component morphogenesis	0.00658972	ENSG00000006468,ENSG00000008086,ENSG00000075223,ENSG00000075711,ENSG00000100271,ENSG00000104133,ENSG00000105738,ENSG00000106078,ENSG00000107731,ENSG00000107798,ENSG00000108946,ENSG00000111424,ENSG00000113163,ENSG00000113916,ENSG00000116574,ENSG00000124333,ENSG00000125124,ENSG00000127603,ENSG00000133961,ENSG00000134313,ENSG00000136854,ENSG00000138002,ENSG00000138594,ENSG00000138696,ENSG00000139132…	ETV1,CDKL5,SEMA3C,DLG1,TTLL1,SPG11,SIPA1L3,COBL,UNC5B,LIPA,PRKAR1A,VDR,COL4A3BP,BCL6,RHOU,VAMP7,BBS2,MACF1,NUMB,KIDINS220,STXBP1,IFT172,TMOD3,BMPR1B,FGD4,BBS4,SSH2,MINK1,ERBB2,LIMD1,RASA1,ST14,DOCK1,FER,EPS8,WASF2,ITGB2,PDLIM5,BRWD3,AKAP13,MTM1,PTPRM,SPTBN2,NCMAP,SEPT9,BCL9L,ITSN2,ATL1,FMN1,CYFIP1
GO:0016043	0.000130871	1.45595	145.06	181	5870	cellular component organization	0.00680172	ENSG00000006468,ENSG00000006747,ENSG00000008086,ENSG00000008952,ENSG00000011021,ENSG00000025796,ENSG00000046604,ENSG00000048052,ENSG00000051382,ENSG00000052795,ENSG00000055609,ENSG00000064201,ENSG00000071242,ENSG00000072062,ENSG00000073969,ENSG00000075223,ENSG00000075711,ENSG00000076108,ENSG00000082196,ENSG00000085832,ENSG00000088888,ENSG00000089163,ENSG00000092330,ENSG00000100242,ENSG00000100271…	ETV1,SCIN,CDKL5,SEC62,CLCN6,SEC63,DSG2,HDAC9,PIK3CB,FNIP2,KMT2C,TSPAN32,RPS6KA2,PRKACA,NSF,SEMA3C,DLG1,BAZ2A,C1QTNF3,EPS15,MAVS,SIRT4,TINF2,SUN2,TTLL1,MTMR3,DAAM1,LONP2,SPG11,SIPA1L3,ITGB8,COBL,WASL,CORO2A,KDM4C,RAPGEF1,UNC5B,LIPA,LZTS2,GBF1,ZMIZ1,TBC1D12,RAB5C,PRKAR1A,IL10RA,BIRC2,TRPV4,ARHGDIB,VDR,SUDS3,ERBB2IP,COL4A3BP,CLINT1,LNPEP,SEC24A,BCL6,KAT2B,USP4,PLSCR4,STAM2,SNX17,CHMP3,RAB3GAP1,DHCR2…
GO:0016125	0.000132272	3.93585	3.33613	12	135	sterol metabolic process	0.00680172	ENSG00000001630,ENSG00000021762,ENSG00000067064,ENSG00000104549,ENSG00000115234,ENSG00000116133,ENSG00000116678,ENSG00000130164,ENSG00000132196,ENSG00000132356,ENSG00000160285,ENSG00000198911	CYP51A1,OSBPL5,IDI1,SQLE,SNX17,DHCR24,LEPR,LDLR,HSD17B7,PRKAA1,LSS,SREBF2
GO:0010906	0.000153759	4.57146	2.42179	10	98	regulation of glucose metabolic process	0.00781975	ENSG00000004799,ENSG00000005882,ENSG00000082196,ENSG00000114166,ENSG00000116678,ENSG00000127334,ENSG00000146674,ENSG00000150907,ENSG00000173281,ENSG00000186951	PDK4,PDK2,C1QTNF3,KAT2B,LEPR,DYRK2,IGFBP3,FOXO1,PPP1R3B,PPARA
GO:0007166	0.000158515	1.58016	64.1279	92	2595	cell surface receptor signaling pathway	0.00797399	ENSG00000004799,ENSG00000005882,ENSG00000026950,ENSG00000051382,ENSG00000058091,ENSG00000064201,ENSG00000072062,ENSG00000075223,ENSG00000078687,ENSG00000085117,ENSG00000085832,ENSG00000088888,ENSG00000100592,ENSG00000105855,ENSG00000106052,ENSG00000106299,ENSG00000107263,ENSG00000107731,ENSG00000107816,ENSG00000108389,ENSG00000110042,ENSG00000110324,ENSG00000110330,ENSG00000111846,ENSG00000112851…	PDK4,PDK2,BTN3A1,PIK3CB,CDK14,TSPAN32,PRKACA,SEMA3C,TNRC6C,CD82,EPS15,MAVS,DAAM1,ITGB8,TAX1BP1,WASL,RAPGEF1,UNC5B,LZTS2,MTMR4,DTX4,IL10RA,BIRC2,GCNT2,ERBB2IP,LNPEP,BCL6,KAT2B,STAM2,GALNT3,EFEMP1,IL1R1,RAB3GAP1,LEPR,PIK3R3,RAB14,CSF3R,TRIM6,PIK3CA,BBS2,DYRK2,MACF1,PRKAA1,NUMB,KIDINS220,SPRY2,IFT172,PLCE1,BMPR1B,PELI2,BBS4,MINK1,ERBB2,PRKACB,LIMD1,RASA1,IGFBP3,DOCK1,FOXO1,CRIM1,MAGI1,FER,EPS8,DISP1…
GO:0008202	0.000160423	2.86742	6.7464	18	273	steroid metabolic process	0.00798319	ENSG00000001630,ENSG00000019186,ENSG00000021762,ENSG00000067064,ENSG00000073734,ENSG00000101846,ENSG00000104549,ENSG00000111424,ENSG00000115234,ENSG00000116133,ENSG00000116678,ENSG00000130164,ENSG00000132196,ENSG00000132356,ENSG00000160285,ENSG00000169057,ENSG00000182827,ENSG00000198911	CYP51A1,CYP24A1,OSBPL5,IDI1,ABCB11,STS,SQLE,VDR,SNX17,DHCR24,LEPR,LDLR,HSD17B7,PRKAA1,LSS,MECP2,ACBD3,SREBF2
GO:0007167	0.000171503	1.92822	23.3776	42	946	enzyme linked receptor protein signaling pathway	0.00844377	ENSG00000004799,ENSG00000005882,ENSG00000051382,ENSG00000085832,ENSG00000106299,ENSG00000107263,ENSG00000108389,ENSG00000111846,ENSG00000112851,ENSG00000113441,ENSG00000115145,ENSG00000115339,ENSG00000115380,ENSG00000117461,ENSG00000119396,ENSG00000121879,ENSG00000136158,ENSG00000138193,ENSG00000138696,ENSG00000141736,ENSG00000145715,ENSG00000146674,ENSG00000150760,ENSG00000150907,ENSG00000150938…	PDK4,PDK2,PIK3CB,EPS15,WASL,RAPGEF1,MTMR4,GCNT2,ERBB2IP,LNPEP,STAM2,GALNT3,EFEMP1,PIK3R3,RAB14,PIK3CA,SPRY2,PLCE1,BMPR1B,ERBB2,RASA1,IGFBP3,DOCK1,FOXO1,CRIM1,FER,EPS8,NCK1,WASF2,JAK1,PIGR,SPRY1,CITED2,TSC1,STXBP4,SLC33A1,EIF2AK3,BCL9L,BCR,MBD5,CYFIP1,ADRA2B
GO:0006914	0.000173524	2.42768	10.5768	24	428	autophagy	0.00845336	ENSG00000051382,ENSG00000080561,ENSG00000100330,ENSG00000108239,ENSG00000115145,ENSG00000115561,ENSG00000115839,ENSG00000116678,ENSG00000119541,ENSG00000132356,ENSG00000133056,ENSG00000135093,ENSG00000150867,ENSG00000150907,ENSG00000151502,ENSG00000157625,ENSG00000160695,ENSG00000165699,ENSG00000171100,ENSG00000171109,ENSG00000188554,ENSG00000196730,ENSG00000196821,ENSG00000198911	PIK3CB,MID2,MTMR3,TBC1D12,STAM2,CHMP3,RAB3GAP1,LEPR,VPS4B,PRKAA1,PIK3C2B,USP30,PIP4K2A,FOXO1,VPS26B,TAB3,VPS11,TSC1,MTM1,MFN1,NBR1,DAPK1,C6orf106,SREBF2
GO:0050688	0.000187497	4.952	2.02639	9	82	regulation of defense response to virus	0.00903893	ENSG00000064201,ENSG00000088888,ENSG00000100280,ENSG00000110330,ENSG00000121236,ENSG00000129657,ENSG00000138032,ENSG00000166747,ENSG00000175115	TSPAN32,MAVS,AP1B1,BIRC2,TRIM6,SEC14L1,PPM1B,AP1G1,PACS1
GO:0006695	0.000213509	6.51846	1.2356	7	50	cholesterol biosynthetic process	0.0101868	ENSG00000001630,ENSG00000067064,ENSG00000104549,ENSG00000116133,ENSG00000132196,ENSG00000132356,ENSG00000160285	CYP51A1,IDI1,SQLE,DHCR24,HSD17B7,PRKAA1,LSS
GO:0032105	0.000220143	17.7026	0.321257	4	13	negative regulation of response to extracellular stimulus	0.0102911	ENSG00000125124,ENSG00000140463,ENSG00000186951,ENSG00000197256	BBS2,BBS4,PPARA,KANK2
GO:0032108	0.000220143	17.7026	0.321257	4	13	negative regulation of response to nutrient levels	0.0102911	ENSG00000125124,ENSG00000140463,ENSG00000186951,ENSG00000197256	BBS2,BBS4,PPARA,KANK2
GO:0010675	0.000237208	3.95502	3.03959	11	123	regulation of cellular carbohydrate metabolic process	0.0109684	ENSG00000004799,ENSG00000005882,ENSG00000082196,ENSG00000114166,ENSG00000116678,ENSG00000127334,ENSG00000146674,ENSG00000150907,ENSG00000171132,ENSG00000173281,ENSG00000186951	PDK4,PDK2,C1QTNF3,KAT2B,LEPR,DYRK2,IGFBP3,FOXO1,PRKCE,PPP1R3B,PPARA
GO:0006066	0.000239371	2.76811	6.96881	18	282	alcohol metabolic process	0.0109684	ENSG00000001630,ENSG00000021762,ENSG00000067064,ENSG00000104549,ENSG00000109452,ENSG00000111424,ENSG00000115234,ENSG00000115425,ENSG00000116133,ENSG00000116678,ENSG00000130164,ENSG00000132196,ENSG00000132356,ENSG00000138193,ENSG00000159082,ENSG00000160285,ENSG00000169057,ENSG00000198911	CYP51A1,OSBPL5,IDI1,SQLE,INPP4B,VDR,SNX17,PECR,DHCR24,LEPR,LDLR,HSD17B7,PRKAA1,PLCE1,SYNJ1,LSS,MECP2,SREBF2
GO:1902653	0.000242287	6.36992	1.26032	7	51	secondary alcohol biosynthetic process	0.0109847	ENSG00000001630,ENSG00000067064,ENSG00000104549,ENSG00000116133,ENSG00000132196,ENSG00000132356,ENSG00000160285	CYP51A1,IDI1,SQLE,DHCR24,HSD17B7,PRKAA1,LSS
GO:0046903	0.000245283	1.85138	26.0713	45	1055	secretion	0.0109847	ENSG00000006747,ENSG00000026950,ENSG00000073734,ENSG00000073969,ENSG00000082196,ENSG00000084234,ENSG00000089163,ENSG00000100665,ENSG00000111199,ENSG00000111424,ENSG00000113615,ENSG00000115839,ENSG00000117139,ENSG00000119541,ENSG00000121236,ENSG00000124333,ENSG00000132326,ENSG00000135241,ENSG00000136854,ENSG00000137486,ENSG00000140092,ENSG00000143457,ENSG00000144036,ENSG00000151422,ENSG00000155093…	SCIN,BTN3A1,ABCB11,NSF,C1QTNF3,APLP2,SIRT4,SERPINA4,TRPV4,VDR,SEC24A,RAB3GAP1,KDM5B,VPS4B,TRIM6,VAMP7,PER2,PNPLA8,STXBP1,ARRB1,FBLN5,GOLPH3L,EXOC6B,FER,PTPRN2,RAB11FIP1,SYNJ1,ABR,VPS11,ARFIP1,STXBP4,AP1G1,MECP2,TMED10,CD14,KCNS3,PRKCE,EIF2AK3,HCAR2,SYN3,BTN3A2,BCR,UNC13B,LGR4,ADRA2B
GO:0001843	0.000246846	4.75565	2.10053	9	85	neural tube closure	0.0109847	ENSG00000072062,ENSG00000106078,ENSG00000120868,ENSG00000138002,ENSG00000140463,ENSG00000142875,ENSG00000149418,ENSG00000165699,ENSG00000184634	PRKACA,COBL,APAF1,IFT172,BBS4,PRKACB,ST14,TSC1,MED12
GO:0071495	0.000264786	1.80856	28.493	48	1153	cellular response to endogenous stimulus	0.0116015	ENSG00000004799,ENSG00000005882,ENSG00000048052,ENSG00000072062,ENSG00000107263,ENSG00000108389,ENSG00000108946,ENSG00000111424,ENSG00000111846,ENSG00000114166,ENSG00000114331,ENSG00000115339,ENSG00000116678,ENSG00000117139,ENSG00000117461,ENSG00000119396,ENSG00000120868,ENSG00000121879,ENSG00000124151,ENSG00000125124,ENSG00000132356,ENSG00000134313,ENSG00000136158,ENSG00000138696,ENSG00000140463…	PDK4,PDK2,HDAC9,PRKACA,RAPGEF1,MTMR4,PRKAR1A,VDR,GCNT2,KAT2B,ACAP2,GALNT3,LEPR,KDM5B,PIK3R3,RAB14,APAF1,PIK3CA,NCOA3,BBS2,PRKAA1,KIDINS220,SPRY2,BMPR1B,BBS4,ERBB2,PRKACB,FOXO1,THRB,FER,ITGB2,SPRY1,CITED2,TSC1,STXBP4,AHCYL1,SLC33A1,AKAP13,PRKCE,NR2F1,MED12,SMYD3,SP1,BCL9L,PPARA,STRN3,KANK2,MBD5
GO:0006111	0.000266697	7.73669	0.914347	6	37	regulation of gluconeogenesis	0.0116015	ENSG00000005882,ENSG00000082196,ENSG00000114166,ENSG00000116678,ENSG00000150907,ENSG00000186951	PDK2,C1QTNF3,KAT2B,LEPR,FOXO1,PPARA
GO:0060606	0.00026979	4.6936	2.12524	9	86	tube closure	0.0116015	ENSG00000072062,ENSG00000106078,ENSG00000120868,ENSG00000138002,ENSG00000140463,ENSG00000142875,ENSG00000149418,ENSG00000165699,ENSG00000184634	PRKACA,COBL,APAF1,IFT172,BBS4,PRKACB,ST14,TSC1,MED12
GO:0030968	0.000273148	3.88516	3.08901	11	125	endoplasmic reticulum unfolded protein response	0.0116015	ENSG00000008952,ENSG00000025796,ENSG00000102580,ENSG00000103429,ENSG00000116406,ENSG00000149428,ENSG00000158092,ENSG00000172071,ENSG00000182158,ENSG00000182934,ENSG00000198380	SEC62,SEC63,DNAJC3,BFAR,EDEM3,HYOU1,NCK1,EIF2AK3,CREB3L2,SRPR,GFPT1
GO:0061024	0.000273243	1.85417	25.4287	44	1029	membrane organization	0.0116015	ENSG00000008952,ENSG00000025796,ENSG00000073969,ENSG00000075711,ENSG00000100242,ENSG00000106299,ENSG00000107862,ENSG00000108239,ENSG00000113441,ENSG00000113615,ENSG00000114698,ENSG00000115561,ENSG00000115839,ENSG00000116133,ENSG00000119396,ENSG00000119541,ENSG00000120756,ENSG00000124333,ENSG00000125124,ENSG00000127603,ENSG00000130779,ENSG00000132589,ENSG00000133961,ENSG00000135093,ENSG00000136854…	SEC62,SEC63,NSF,DLG1,SUN2,WASL,GBF1,TBC1D12,LNPEP,SEC24A,PLSCR4,CHMP3,RAB3GAP1,DHCR24,RAB14,VPS4B,PLS1,VAMP7,BBS2,MACF1,CLIP1,FLOT2,NUMB,USP30,STXBP1,ERBB2,GULP1,DOCK1,ITGB2,VPS11,ALOX15,PIGR,SLC25A46,TBC1D2B,TMED10,MFN1,VCPIP1,PACS1,SNX18,SRPR,MBP,RUNDC1,BAG6,TBC1D8
GO:0006109	0.000276109	3.6103	3.60797	12	146	regulation of carbohydrate metabolic process	0.0116167	ENSG00000004799,ENSG00000005882,ENSG00000082196,ENSG00000114166,ENSG00000116678,ENSG00000127334,ENSG00000132356,ENSG00000146674,ENSG00000150907,ENSG00000171132,ENSG00000173281,ENSG00000186951	PDK4,PDK2,C1QTNF3,KAT2B,LEPR,DYRK2,PRKAA1,IGFBP3,FOXO1,PRKCE,PPP1R3B,PPARA
GO:0070162	0.000283464	39.7482	0.148273	3	6	adiponectin secretion	0.0117131	ENSG00000082196,ENSG00000156675,ENSG00000182782	C1QTNF3,RAB11FIP1,HCAR2
GO:0070163	0.000283464	39.7482	0.148273	3	6	regulation of adiponectin secretion	0.0117131	ENSG00000082196,ENSG00000156675,ENSG00000182782	C1QTNF3,RAB11FIP1,HCAR2
GO:1903573	0.000310176	7.49446	0.93906	6	38	negative regulation of response to endoplasmic reticulum stress	0.0127035	ENSG00000068912,ENSG00000102580,ENSG00000103429,ENSG00000149428,ENSG00000155313,ENSG00000158092	ERLEC1,DNAJC3,BFAR,HYOU1,USP25,NCK1
GO:0006661	0.000313576	3.8177	3.13844	11	127	phosphatidylinositol biosynthetic process	0.0127301	ENSG00000051382,ENSG00000100330,ENSG00000108389,ENSG00000109452,ENSG00000117461,ENSG00000121879,ENSG00000133056,ENSG00000143393,ENSG00000150867,ENSG00000159082,ENSG00000171100	PIK3CB,MTMR3,MTMR4,INPP4B,PIK3R3,PIK3CA,PIK3C2B,PI4KB,PIP4K2A,SYNJ1,MTM1
GO:0034620	0.000335609	3.78483	3.16315	11	128	cellular response to unfolded protein	0.0135061	ENSG00000008952,ENSG00000025796,ENSG00000102580,ENSG00000103429,ENSG00000116406,ENSG00000149428,ENSG00000158092,ENSG00000172071,ENSG00000182158,ENSG00000182934,ENSG00000198380	SEC62,SEC63,DNAJC3,BFAR,EDEM3,HYOU1,NCK1,EIF2AK3,CREB3L2,SRPR,GFPT1
GO:0048585	0.000370271	1.73069	32.8918	53	1331	negative regulation of response to stimulus	0.0147354	ENSG00000068912,ENSG00000072062,ENSG00000075223,ENSG00000075711,ENSG00000082196,ENSG00000085832,ENSG00000102580,ENSG00000103429,ENSG00000107263,ENSG00000107731,ENSG00000107816,ENSG00000108389,ENSG00000112851,ENSG00000113916,ENSG00000115145,ENSG00000125124,ENSG00000129657,ENSG00000132356,ENSG00000133961,ENSG00000135090,ENSG00000135472,ENSG00000136158,ENSG00000137486,ENSG00000138032,ENSG00000140463…	ERLEC1,PRKACA,SEMA3C,DLG1,C1QTNF3,EPS15,DNAJC3,BFAR,RAPGEF1,UNC5B,LZTS2,MTMR4,ERBB2IP,BCL6,STAM2,BBS2,SEC14L1,PRKAA1,NUMB,TAOK3,FAIM2,SPRY2,ARRB1,PPM1B,BBS4,PRKACB,LIMD1,RASA1,IGFBP3,HYOU1,FOXO1,FER,CNKSR3,USP25,DEPTOR,NCK1,ABR,ALOX15,SPRY1,TSC1,ARHGAP42,HIF1AN,CD14,MTM1,MED12,BCL9L,BCR,PPARA,DAPK1,STRN3,KANK2,LGR4,OTUD7B
GO:0044763	0.000372524	1.48603	288.242	319	11664	single-organism cellular process	0.0147354	ENSG00000001561,ENSG00000004799,ENSG00000005108,ENSG00000005882,ENSG00000006468,ENSG00000006747,ENSG00000007237,ENSG00000008086,ENSG00000008283,ENSG00000008952,ENSG00000011021,ENSG00000019186,ENSG00000025796,ENSG00000026950,ENSG00000046604,ENSG00000047457,ENSG00000048052,ENSG00000051382,ENSG00000052795,ENSG00000058091,ENSG00000064201,ENSG00000067064,ENSG00000068912,ENSG00000071242,ENSG00000072062…	ENPP4,PDK4,THSD7A,PDK2,ETV1,SCIN,GAS7,CDKL5,CYB561,SEC62,CLCN6,CYP24A1,SEC63,BTN3A1,DSG2,CP,HDAC9,PIK3CB,FNIP2,CDK14,TSPAN32,IDI1,ERLEC1,RPS6KA2,PRKACA,ABCB11,NSF,SEMA3C,DLG1,BAZ2A,PPP1R12B,DNAJC10,DYNC1I2,TNRC6C,MID2,C1QTNF3,APLP2,CD82,EPS15,MAVS,SIRT4,TINF2,GABRP,SUN2,TTLL1,MTMR3,ABHD4,SOS2,DAAM1,SERPINA4,ARHGAP5,STS,MAGT1,NDFIP2,DNAJC3,PARP4,LONP2,BFAR,SPG11,TUSC3,SIPA1L3,ITGB8,TAX1BP1,CHN2,CO…
GO:0016197	0.000389594	2.84104	6.02975	16	244	endosomal transport	0.0151708	ENSG00000085832,ENSG00000107185,ENSG00000107862,ENSG00000108774,ENSG00000115145,ENSG00000115234,ENSG00000115561,ENSG00000119396,ENSG00000119541,ENSG00000124333,ENSG00000141252,ENSG00000151502,ENSG00000160695,ENSG00000166747,ENSG00000171100,ENSG00000178996	EPS15,RGP1,GBF1,RAB5C,STAM2,SNX17,CHMP3,RAB14,VPS4B,VAMP7,VPS53,VPS26B,VPS11,AP1G1,MTM1,SNX18
GO:0071840	0.000390087	1.41264	148.767	182	6020	cellular component organization or biogenesis	0.0151708	ENSG00000006468,ENSG00000006747,ENSG00000008086,ENSG00000008952,ENSG00000011021,ENSG00000025796,ENSG00000046604,ENSG00000048052,ENSG00000051382,ENSG00000052795,ENSG00000055609,ENSG00000064201,ENSG00000071242,ENSG00000072062,ENSG00000073969,ENSG00000075223,ENSG00000075711,ENSG00000076108,ENSG00000082196,ENSG00000085832,ENSG00000088888,ENSG00000089163,ENSG00000092330,ENSG00000100242,ENSG00000100271…	ETV1,SCIN,CDKL5,SEC62,CLCN6,SEC63,DSG2,HDAC9,PIK3CB,FNIP2,KMT2C,TSPAN32,RPS6KA2,PRKACA,NSF,SEMA3C,DLG1,BAZ2A,C1QTNF3,EPS15,MAVS,SIRT4,TINF2,SUN2,TTLL1,MTMR3,DAAM1,LONP2,SPG11,SIPA1L3,ITGB8,COBL,WASL,CORO2A,KDM4C,RAPGEF1,UNC5B,LIPA,LZTS2,GBF1,ZMIZ1,TBC1D12,RAB5C,PRKAR1A,IL10RA,BIRC2,TRPV4,ARHGDIB,VDR,SUDS3,ERBB2IP,COL4A3BP,CLINT1,LNPEP,SEC24A,BCL6,KAT2B,USP4,PLSCR4,STAM2,SNX17,CHMP3,RAB3GAP1,DHCR2…
GO:0006006	0.000399344	3.09029	4.86828	14	197	glucose metabolic process	0.0154014	ENSG00000004799,ENSG00000005882,ENSG00000082196,ENSG00000114166,ENSG00000115840,ENSG00000116678,ENSG00000121879,ENSG00000127334,ENSG00000132326,ENSG00000132356,ENSG00000146674,ENSG00000150907,ENSG00000173281,ENSG00000186951	PDK4,PDK2,C1QTNF3,KAT2B,SLC25A12,LEPR,PIK3CA,DYRK2,PER2,PRKAA1,IGFBP3,FOXO1,PPP1R3B,PPARA
GO:0032879	0.000402781	1.5544	58.9136	84	2384	regulation of localization	0.0154056	ENSG00000006747,ENSG00000011021,ENSG00000046604,ENSG00000048052,ENSG00000051382,ENSG00000068912,ENSG00000072062,ENSG00000073969,ENSG00000075223,ENSG00000075711,ENSG00000082196,ENSG00000088888,ENSG00000089163,ENSG00000100242,ENSG00000102471,ENSG00000106299,ENSG00000107816,ENSG00000107862,ENSG00000108239,ENSG00000108774,ENSG00000111199,ENSG00000111348,ENSG00000111846,ENSG00000113615,ENSG00000113916…	SCIN,CLCN6,DSG2,HDAC9,PIK3CB,ERLEC1,PRKACA,NSF,SEMA3C,DLG1,C1QTNF3,MAVS,SIRT4,SUN2,NDFIP2,WASL,LZTS2,GBF1,TBC1D12,RAB5C,TRPV4,ARHGDIB,GCNT2,SEC24A,BCL6,SNX17,CHMP3,IL1R1,RAB3GAP1,RHOU,KDM5B,PIK3R3,RAB14,VPS4B,PLS1,TRIM6,VAMP7,BBS2,DYRK2,MACF1,PER2,PRKAA1,NUMB,STXBP1,ARRB1,PPM1B,BBS4,MINK1,ERBB2,CTTNBP2NL,GOLPH3L,IGFBP3,DOCK1,FER,CNKSR3,RAB11FIP1,NCK1,ABR,VPS11,ALOX15,ARFIP1,CITED2,KCNK5,STXBP4,AP…
GO:0014020	0.000412654	4.40604	2.2488	9	91	primary neural tube formation	0.0156538	ENSG00000072062,ENSG00000106078,ENSG00000120868,ENSG00000138002,ENSG00000140463,ENSG00000142875,ENSG00000149418,ENSG00000165699,ENSG00000184634	PRKACA,COBL,APAF1,IFT172,BBS4,PRKACB,ST14,TSC1,MED12
GO:0044089	0.000431103	2.31467	10.5768	23	428	positive regulation of cellular component biogenesis	0.0160362	ENSG00000006747,ENSG00000052795,ENSG00000075711,ENSG00000106078,ENSG00000106299,ENSG00000115839,ENSG00000119541,ENSG00000130779,ENSG00000140463,ENSG00000150867,ENSG00000151422,ENSG00000158092,ENSG00000158195,ENSG00000158290,ENSG00000161905,ENSG00000164144,ENSG00000165699,ENSG00000169057,ENSG00000171132,ENSG00000184640,ENSG00000198722,ENSG00000248905,ENSG00000273749	SCIN,FNIP2,DLG1,COBL,WASL,RAB3GAP1,VPS4B,CLIP1,BBS4,PIP4K2A,FER,NCK1,WASF2,CUL4B,ALOX15,ARFIP1,TSC1,MECP2,PRKCE,SEPT9,UNC13B,FMN1,CYFIP1
GO:0032940	0.000436433	1.8636	22.9081	40	927	secretion by cell	0.0160362	ENSG00000006747,ENSG00000026950,ENSG00000073969,ENSG00000082196,ENSG00000084234,ENSG00000089163,ENSG00000100665,ENSG00000111199,ENSG00000113615,ENSG00000115839,ENSG00000119541,ENSG00000121236,ENSG00000124333,ENSG00000132326,ENSG00000136854,ENSG00000137486,ENSG00000143457,ENSG00000144036,ENSG00000151422,ENSG00000155093,ENSG00000156675,ENSG00000159082,ENSG00000159842,ENSG00000160695,ENSG00000164144…	SCIN,BTN3A1,NSF,C1QTNF3,APLP2,SIRT4,SERPINA4,TRPV4,SEC24A,RAB3GAP1,VPS4B,TRIM6,VAMP7,PER2,STXBP1,ARRB1,GOLPH3L,EXOC6B,FER,PTPRN2,RAB11FIP1,SYNJ1,ABR,VPS11,ARFIP1,STXBP4,AP1G1,MECP2,TMED10,CD14,KCNS3,PRKCE,EIF2AK3,HCAR2,SYN3,BTN3A2,BCR,UNC13B,LGR4,ADRA2B
GO:0016126	0.000436595	5.71817	1.38388	7	56	sterol biosynthetic process	0.0160362	ENSG00000001630,ENSG00000067064,ENSG00000104549,ENSG00000116133,ENSG00000132196,ENSG00000132356,ENSG00000160285	CYP51A1,IDI1,SQLE,DHCR24,HSD17B7,PRKAA1,LSS
GO:0070059	0.000436595	5.71817	1.38388	7	56	intrinsic apoptotic signaling pathway in response to endoplasmic reticulum stress	0.0160362	ENSG00000077232,ENSG00000120868,ENSG00000149428,ENSG00000158092,ENSG00000172071,ENSG00000197442,ENSG00000204463	DNAJC10,APAF1,HYOU1,NCK1,EIF2AK3,MAP3K5,BAG6
GO:0051125	0.000463441	9.06746	0.667226	5	27	regulation of actin nucleation	0.01688	ENSG00000006747,ENSG00000106299,ENSG00000164144,ENSG00000248905,ENSG00000273749	SCIN,WASL,ARFIP1,FMN1,CYFIP1
GO:0051130	0.000470431	1.77889	27.6528	46	1119	positive regulation of cellular component organization	0.01688	ENSG00000006747,ENSG00000008086,ENSG00000052795,ENSG00000075711,ENSG00000092330,ENSG00000106078,ENSG00000106299,ENSG00000107263,ENSG00000111199,ENSG00000113916,ENSG00000115839,ENSG00000116574,ENSG00000119541,ENSG00000120756,ENSG00000124333,ENSG00000127603,ENSG00000130779,ENSG00000134313,ENSG00000137486,ENSG00000140463,ENSG00000141736,ENSG00000145868,ENSG00000150760,ENSG00000150867,ENSG00000151422…	SCIN,CDKL5,FNIP2,DLG1,TINF2,COBL,WASL,RAPGEF1,TRPV4,BCL6,RAB3GAP1,RHOU,VPS4B,PLS1,VAMP7,MACF1,CLIP1,KIDINS220,ARRB1,BBS4,ERBB2,FBXO38,DOCK1,PIP4K2A,FER,NCK1,WASF2,CUL4B,SYNJ1,ABR,VPS11,ALOX15,ARFIP1,TSC1,MECP2,CD14,PRKCE,TADA2B,NDNF,SEPT9,BCR,ITSN2,UNC13B,SREBF2,FMN1,CYFIP1
GO:0046580	0.000474624	6.85081	1.0132	6	41	negative regulation of Ras protein signal transduction	0.01688	ENSG00000107263,ENSG00000113916,ENSG00000136158,ENSG00000145715,ENSG00000164056,ENSG00000165895	RAPGEF1,BCL6,SPRY2,RASA1,SPRY1,ARHGAP42
GO:0036491	0.000486966	29.8093	0.172985	3	7	regulation of translation initiation in response to endoplasmic reticulum stress	0.01688	ENSG00000102580,ENSG00000158092,ENSG00000172071	DNAJC3,NCK1,EIF2AK3
GO:0036492	0.000486966	29.8093	0.172985	3	7	eiF2alpha phosphorylation in response to endoplasmic reticulum stress	0.01688	ENSG00000102580,ENSG00000158092,ENSG00000172071	DNAJC3,NCK1,EIF2AK3
GO:0070417	0.000486966	29.8093	0.172985	3	7	cellular response to cold	0.01688	ENSG00000102580,ENSG00000150907,ENSG00000172071	DNAJC3,FOXO1,EIF2AK3
GO:0016050	0.00048855	2.52063	8.03143	19	325	vesicle organization	0.01688	ENSG00000073969,ENSG00000085832,ENSG00000106299,ENSG00000107862,ENSG00000108239,ENSG00000113615,ENSG00000115561,ENSG00000119396,ENSG00000119541,ENSG00000124333,ENSG00000136854,ENSG00000160695,ENSG00000166747,ENSG00000167202,ENSG00000170348,ENSG00000178996,ENSG00000198087,ENSG00000198863,ENSG00000204634	NSF,EPS15,WASL,GBF1,TBC1D12,SEC24A,CHMP3,RAB14,VPS4B,VAMP7,STXBP1,VPS11,AP1G1,TBC1D2B,TMED10,SNX18,CD2AP,RUNDC1,TBC1D8
GO:0043623	0.00049118	2.1355	13.4434	27	544	cellular protein complex assembly	0.01688	ENSG00000006747,ENSG00000075711,ENSG00000085832,ENSG00000106078,ENSG00000106299,ENSG00000111199,ENSG00000113282,ENSG00000115561,ENSG00000121236,ENSG00000124333,ENSG00000130779,ENSG00000136854,ENSG00000138594,ENSG00000140463,ENSG00000145715,ENSG00000151422,ENSG00000151491,ENSG00000158092,ENSG00000159082,ENSG00000160695,ENSG00000161905,ENSG00000164144,ENSG00000171132,ENSG00000173898,ENSG00000198722…	SCIN,DLG1,EPS15,COBL,WASL,TRPV4,CLINT1,CHMP3,TRIM6,VAMP7,CLIP1,STXBP1,TMOD3,BBS4,RASA1,FER,EPS8,NCK1,SYNJ1,VPS11,ALOX15,ARFIP1,PRKCE,SPTBN2,UNC13B,FMN1,CYFIP1
GO:0051495	0.000492395	3.17817	4.39875	13	178	positive regulation of cytoskeleton organization	0.01688	ENSG00000006747,ENSG00000075711,ENSG00000106299,ENSG00000111199,ENSG00000119541,ENSG00000130779,ENSG00000151422,ENSG00000158092,ENSG00000161905,ENSG00000164144,ENSG00000171132,ENSG00000248905,ENSG00000273749	SCIN,DLG1,WASL,TRPV4,VPS4B,CLIP1,FER,NCK1,ALOX15,ARFIP1,PRKCE,FMN1,CYFIP1
GO:0044267	0.000504623	1.42308	118.099	149	4779	cellular protein metabolic process	0.017172	ENSG00000004799,ENSG00000005882,ENSG00000008086,ENSG00000048052,ENSG00000051382,ENSG00000052795,ENSG00000055609,ENSG00000058091,ENSG00000071242,ENSG00000072062,ENSG00000075711,ENSG00000076108,ENSG00000077232,ENSG00000078687,ENSG00000080561,ENSG00000084234,ENSG00000088888,ENSG00000089163,ENSG00000092330,ENSG00000100271,ENSG00000100330,ENSG00000100665,ENSG00000100897,ENSG00000101846,ENSG00000102158…	PDK4,PDK2,CDKL5,HDAC9,PIK3CB,FNIP2,KMT2C,CDK14,RPS6KA2,PRKACA,DLG1,BAZ2A,DNAJC10,TNRC6C,MID2,APLP2,MAVS,SIRT4,TINF2,TTLL1,MTMR3,SERPINA4,DCAF11,STS,MAGT1,NDFIP2,DNAJC3,PARP4,LONP2,BFAR,TUSC3,KDM4C,RGP1,RAPGEF1,MTMR4,PRKAR1A,DTX4,BIRC2,TRPV4,SUDS3,GCNT2,COL4A3BP,LNPEP,BCL6,KAT2B,USP4,GALNT3,EFEMP1,RAB3GAP1,SLC25A12,DHCR24,EDEM3,KDM5B,MUC5B,VPS4B,APAF1,TRIM6,PIK3CA,NCOA3,DYRK2,MGAT3,SPCS3,TRAF7,PER…
GO:0009653	0.000509052	1.53093	61.9532	87	2507	anatomical structure morphogenesis	0.0171963	ENSG00000005108,ENSG00000006468,ENSG00000008086,ENSG00000048052,ENSG00000051382,ENSG00000072062,ENSG00000075223,ENSG00000075711,ENSG00000100271,ENSG00000100592,ENSG00000104133,ENSG00000105738,ENSG00000106078,ENSG00000107731,ENSG00000107798,ENSG00000108175,ENSG00000108946,ENSG00000111424,ENSG00000113163,ENSG00000113916,ENSG00000115380,ENSG00000115839,ENSG00000116574,ENSG00000116678,ENSG00000117139…	THSD7A,ETV1,CDKL5,HDAC9,PIK3CB,PRKACA,SEMA3C,DLG1,TTLL1,DAAM1,SPG11,SIPA1L3,COBL,UNC5B,LIPA,ZMIZ1,PRKAR1A,VDR,COL4A3BP,BCL6,EFEMP1,RAB3GAP1,RHOU,LEPR,KDM5B,CSF3R,HOXB5,APAF1,PIK3CA,VAMP7,BBS2,MACF1,NUMB,KIDINS220,FAIM2,SPRY2,SETDB2,IGF2BP3,STXBP1,IFT172,TMOD3,BMPR1B,FGD4,SLC12A6,BBS4,SSH2,MINK1,ERBB2,PRKACB,LIMD1,RASA1,ST14,DOCK1,FOXO1,THRB,FER,EPS8,WASF2,ABR,ITGB2,JAK1,PDLIM5,PRICKLE2,SPRY1,CITE…
GO:0000902	0.000525938	1.7798	27.0103	45	1093	cell morphogenesis	0.017591	ENSG00000006468,ENSG00000008086,ENSG00000075223,ENSG00000075711,ENSG00000100271,ENSG00000104133,ENSG00000105738,ENSG00000106078,ENSG00000107731,ENSG00000107798,ENSG00000111424,ENSG00000113163,ENSG00000113916,ENSG00000116574,ENSG00000124333,ENSG00000125124,ENSG00000127603,ENSG00000133961,ENSG00000134313,ENSG00000136854,ENSG00000138002,ENSG00000138696,ENSG00000139132,ENSG00000140463,ENSG00000141298…	ETV1,CDKL5,SEMA3C,DLG1,TTLL1,SPG11,SIPA1L3,COBL,UNC5B,LIPA,VDR,COL4A3BP,BCL6,RHOU,VAMP7,BBS2,MACF1,NUMB,KIDINS220,STXBP1,IFT172,BMPR1B,FGD4,BBS4,SSH2,MINK1,ERBB2,LIMD1,RASA1,ST14,DOCK1,FER,EPS8,WASF2,ITGB2,PDLIM5,BRWD3,PTPRM,SPTBN2,SEPT9,BCL9L,ITSN2,ATL1,FMN1,CYFIP1
GO:0051127	0.000528337	13.2745	0.395393	4	16	positive regulation of actin nucleation	0.017591	ENSG00000006747,ENSG00000106299,ENSG00000248905,ENSG00000273749	SCIN,WASL,FMN1,CYFIP1
GO:0051058	0.000542338	6.6601	1.03791	6	42	negative regulation of small GTPase mediated signal transduction	0.0179282	ENSG00000107263,ENSG00000113916,ENSG00000136158,ENSG00000145715,ENSG00000164056,ENSG00000165895	RAPGEF1,BCL6,SPRY2,RASA1,SPRY1,ARHGAP42
GO:0045017	0.00056663	2.97514	5.04127	14	204	glycerolipid biosynthetic process	0.0183469	ENSG00000051382,ENSG00000100330,ENSG00000108389,ENSG00000109452,ENSG00000117461,ENSG00000121879,ENSG00000130164,ENSG00000133056,ENSG00000138193,ENSG00000143393,ENSG00000150867,ENSG00000159082,ENSG00000161905,ENSG00000171100	PIK3CB,MTMR3,MTMR4,INPP4B,PIK3R3,PIK3CA,LDLR,PIK3C2B,PLCE1,PI4KB,PIP4K2A,SYNJ1,ALOX15,MTM1
GO:0070887	0.000566652	1.51874	63.9055	89	2586	cellular response to chemical stimulus	0.0183469	ENSG00000004799,ENSG00000005882,ENSG00000008952,ENSG00000019186,ENSG00000025796,ENSG00000048052,ENSG00000071242,ENSG00000072062,ENSG00000088888,ENSG00000089163,ENSG00000102580,ENSG00000103429,ENSG00000106052,ENSG00000107263,ENSG00000107862,ENSG00000108389,ENSG00000108946,ENSG00000110324,ENSG00000110330,ENSG00000111199,ENSG00000111424,ENSG00000111846,ENSG00000112851,ENSG00000114166,ENSG00000114331…	PDK4,PDK2,SEC62,CYP24A1,SEC63,HDAC9,RPS6KA2,PRKACA,MAVS,SIRT4,DNAJC3,BFAR,TAX1BP1,RAPGEF1,GBF1,MTMR4,PRKAR1A,IL10RA,BIRC2,TRPV4,VDR,GCNT2,ERBB2IP,KAT2B,ACAP2,PLSCR4,GALNT3,IL1R1,EDEM3,LEPR,ETV3,KDM5B,PIK3R3,RAB14,CSF3R,APAF1,TRIM6,PIK3CA,NCOA3,BBS2,LDLR,PRKAA1,KIDINS220,SPRY2,ARRB1,BMPR1B,FBLN5,BBS4,CPNE2,ERBB2,PRKACB,HYOU1,FOXO1,THRB,FER,CXADR,PTPRN2,NCK1,ITGB2,ALOX15,JAK1,SPRY1,CITED2,TSC1,HIF1…
GO:0031669	0.000566898	3.3111	3.90451	12	158	cellular response to nutrient levels	0.0183469	ENSG00000004799,ENSG00000005882,ENSG00000019186,ENSG00000100330,ENSG00000111424,ENSG00000132356,ENSG00000133056,ENSG00000150907,ENSG00000165699,ENSG00000172071,ENSG00000197256,ENSG00000198911	PDK4,PDK2,CYP24A1,MTMR3,VDR,PRKAA1,PIK3C2B,FOXO1,TSC1,EIF2AK3,KANK2,SREBF2
GO:0008610	0.000597793	2.047	15.0497	29	609	lipid biosynthetic process	0.0190512	ENSG00000001630,ENSG00000004799,ENSG00000051382,ENSG00000067064,ENSG00000073734,ENSG00000089163,ENSG00000100330,ENSG00000104549,ENSG00000108389,ENSG00000109452,ENSG00000111424,ENSG00000113163,ENSG00000115425,ENSG00000116133,ENSG00000117461,ENSG00000121879,ENSG00000130164,ENSG00000132196,ENSG00000132356,ENSG00000133056,ENSG00000135241,ENSG00000138193,ENSG00000143393,ENSG00000150867,ENSG00000159082…	CYP51A1,PDK4,PIK3CB,IDI1,ABCB11,SIRT4,MTMR3,SQLE,MTMR4,INPP4B,VDR,COL4A3BP,PECR,DHCR24,PIK3R3,PIK3CA,LDLR,HSD17B7,PRKAA1,PIK3C2B,PNPLA8,PLCE1,PI4KB,PIP4K2A,SYNJ1,LSS,ALOX15,MTM1,ACBD3
GO:0042539	0.000609242	Inf	0.0494242	2	2	hypotonic salinity response	0.0190512	ENSG00000111199,ENSG00000140199	TRPV4,SLC12A6
GO:0043314	0.000609242	Inf	0.0494242	2	2	negative regulation of neutrophil degranulation	0.0190512	ENSG00000159842,ENSG00000186716	ABR,BCR
GO:0070165	0.000609242	Inf	0.0494242	2	2	positive regulation of adiponectin secretion	0.0190512	ENSG00000082196,ENSG00000182782	C1QTNF3,HCAR2
GO:0071477	0.000609242	Inf	0.0494242	2	2	cellular hypotonic salinity response	0.0190512	ENSG00000111199,ENSG00000140199	TRPV4,SLC12A6
GO:0044707	0.000644902	1.3953	143.38	175	5802	single-multicellular organism process	0.019935	ENSG00000001561,ENSG00000004799,ENSG00000005108,ENSG00000006468,ENSG00000006747,ENSG00000007237,ENSG00000008086,ENSG00000019186,ENSG00000025796,ENSG00000026950,ENSG00000046604,ENSG00000048052,ENSG00000051382,ENSG00000064201,ENSG00000071242,ENSG00000072062,ENSG00000075223,ENSG00000075711,ENSG00000082196,ENSG00000088888,ENSG00000100280,ENSG00000100592,ENSG00000100852,ENSG00000104133,ENSG00000105738…	ENPP4,PDK4,THSD7A,ETV1,SCIN,GAS7,CDKL5,CYP24A1,SEC63,BTN3A1,DSG2,HDAC9,PIK3CB,TSPAN32,RPS6KA2,PRKACA,SEMA3C,DLG1,C1QTNF3,MAVS,AP1B1,DAAM1,ARHGAP5,SPG11,SIPA1L3,ITGB8,TAX1BP1,COBL,RAPGEF1,UNC5B,LIPA,LZTS2,ZMIZ1,RAI1,PRKAR1A,DTX4,BIRC2,TRPV4,ARHGDIB,VDR,SUDS3,GCNT2,ERBB2IP,COL4A3BP,BCL6,SNX17,EFEMP1,RAB3GAP1,DHCR24,LEPR,KDM5B,TJP2,RAB14,CSF3R,HOXB5,KIAA1217,PLS1,APAF1,TRIM6,PIK3CA,NCOA3,VAMP7,BBS2,…
GO:0097009	0.000654615	8.31081	0.716651	5	29	energy homeostasis	0.019935	ENSG00000111199,ENSG00000116678,ENSG00000121879,ENSG00000132356,ENSG00000150907	TRPV4,LEPR,PIK3CA,PRKAA1,FOXO1
GO:0033500	0.000654736	2.92835	5.1154	14	207	carbohydrate homeostasis	0.019935	ENSG00000004799,ENSG00000005882,ENSG00000072062,ENSG00000111199,ENSG00000116678,ENSG00000121879,ENSG00000132356,ENSG00000137486,ENSG00000150907,ENSG00000155093,ENSG00000166263,ENSG00000171132,ENSG00000198722,ENSG00000204406	PDK4,PDK2,PRKACA,TRPV4,LEPR,PIK3CA,PRKAA1,ARRB1,FOXO1,PTPRN2,STXBP4,PRKCE,UNC13B,MBD5
GO:0042593	0.000654736	2.92835	5.1154	14	207	glucose homeostasis	0.019935	ENSG00000004799,ENSG00000005882,ENSG00000072062,ENSG00000111199,ENSG00000116678,ENSG00000121879,ENSG00000132356,ENSG00000137486,ENSG00000150907,ENSG00000155093,ENSG00000166263,ENSG00000171132,ENSG00000198722,ENSG00000204406	PDK4,PDK2,PRKACA,TRPV4,LEPR,PIK3CA,PRKAA1,ARRB1,FOXO1,PTPRN2,STXBP4,PRKCE,UNC13B,MBD5
GO:2000505	0.000677503	12.2526	0.420106	4	17	regulation of energy homeostasis	0.0204934	ENSG00000111199,ENSG00000116678,ENSG00000132356,ENSG00000150907	TRPV4,LEPR,PRKAA1,FOXO1
GO:0044088	0.000700109	6.30879	1.08733	6	44	regulation of vacuole organization	0.0210396	ENSG00000100330,ENSG00000108239,ENSG00000115839,ENSG00000150867,ENSG00000159082,ENSG00000171100	MTMR3,TBC1D12,RAB3GAP1,PIP4K2A,SYNJ1,MTM1
GO:0006094	0.000732614	4.51513	1.95226	8	79	gluconeogenesis	0.0218744	ENSG00000005882,ENSG00000082196,ENSG00000114166,ENSG00000115840,ENSG00000116678,ENSG00000132326,ENSG00000150907,ENSG00000186951	PDK2,C1QTNF3,KAT2B,SLC25A12,LEPR,PER2,FOXO1,PPARA
GO:0035967	0.000762621	3.40361	3.4844	11	141	cellular response to topologically incorrect protein	0.0225468	ENSG00000008952,ENSG00000025796,ENSG00000102580,ENSG00000103429,ENSG00000116406,ENSG00000149428,ENSG00000158092,ENSG00000172071,ENSG00000182158,ENSG00000182934,ENSG00000198380	SEC62,SEC63,DNAJC3,BFAR,EDEM3,HYOU1,NCK1,EIF2AK3,CREB3L2,SRPR,GFPT1
GO:0036490	0.000764877	23.846	0.197697	3	8	regulation of translation in response to endoplasmic reticulum stress	0.0225468	ENSG00000102580,ENSG00000158092,ENSG00000172071	DNAJC3,NCK1,EIF2AK3
GO:0018209	0.00077698	2.65209	6.42514	16	260	peptidyl-serine modification	0.0226155	ENSG00000052795,ENSG00000071242,ENSG00000072062,ENSG00000115339,ENSG00000121236,ENSG00000121879,ENSG00000132356,ENSG00000136158,ENSG00000137486,ENSG00000153721,ENSG00000158092,ENSG00000159256,ENSG00000171132,ENSG00000172071,ENSG00000173376,ENSG00000185420	FNIP2,RPS6KA2,PRKACA,GALNT3,TRIM6,PIK3CA,PRKAA1,SPRY2,ARRB1,CNKSR3,NCK1,MORC3,PRKCE,EIF2AK3,NDNF,SMYD3
GO:0030522	0.00077698	2.65209	6.42514	16	260	intracellular receptor signaling pathway	0.0226155	ENSG00000019186,ENSG00000088888,ENSG00000110330,ENSG00000111424,ENSG00000112851,ENSG00000124151,ENSG00000129657,ENSG00000151090,ENSG00000157625,ENSG00000161905,ENSG00000164442,ENSG00000175745,ENSG00000184634,ENSG00000186951,ENSG00000196792,ENSG00000197256	CYP24A1,MAVS,BIRC2,VDR,ERBB2IP,NCOA3,SEC14L1,THRB,TAB3,ALOX15,CITED2,NR2F1,MED12,PPARA,STRN3,KANK2
GO:0048519	0.000803099	1.411	110.858	140	4486	negative regulation of biological process	0.0232296	ENSG00000004799,ENSG00000006747,ENSG00000007237,ENSG00000048052,ENSG00000052795,ENSG00000064201,ENSG00000068912,ENSG00000071242,ENSG00000072062,ENSG00000075223,ENSG00000075711,ENSG00000076108,ENSG00000077232,ENSG00000078687,ENSG00000080561,ENSG00000082196,ENSG00000084234,ENSG00000085832,ENSG00000088888,ENSG00000089163,ENSG00000092330,ENSG00000100665,ENSG00000102471,ENSG00000102580,ENSG00000103429…	PDK4,SCIN,GAS7,HDAC9,FNIP2,TSPAN32,ERLEC1,RPS6KA2,PRKACA,SEMA3C,DLG1,BAZ2A,DNAJC10,TNRC6C,MID2,C1QTNF3,APLP2,EPS15,MAVS,SIRT4,TINF2,SERPINA4,NDFIP2,DNAJC3,BFAR,ITGB8,TAX1BP1,WASL,RGP1,RAPGEF1,UNC5B,LZTS2,MTMR4,RAI1,PRKAR1A,BIRC2,TRPV4,ARHGDIB,VDR,SUDS3,HCFC2,GCNT2,ERBB2IP,BCL6,KAT2B,USP4,STAM2,EFEMP1,CHMP3,DHCR24,LEPR,ETV3,KDM5B,RCOR3,VPS4B,IRF2BPL,TRIM6,PIK3CA,BBS2,DYRK2,SEC14L1,LDLR,PER2,PRKAA1…
GO:0050793	0.000808389	1.53345	55.0338	78	2227	regulation of developmental process	0.0232374	ENSG00000006747,ENSG00000008086,ENSG00000048052,ENSG00000072062,ENSG00000075223,ENSG00000075711,ENSG00000100592,ENSG00000106078,ENSG00000107263,ENSG00000108557,ENSG00000110330,ENSG00000111199,ENSG00000111348,ENSG00000111424,ENSG00000111846,ENSG00000113916,ENSG00000115380,ENSG00000116574,ENSG00000117139,ENSG00000119535,ENSG00000120756,ENSG00000121236,ENSG00000121879,ENSG00000124151,ENSG00000124333…	SCIN,CDKL5,HDAC9,PRKACA,SEMA3C,DLG1,DAAM1,COBL,RAPGEF1,RAI1,BIRC2,TRPV4,ARHGDIB,VDR,GCNT2,BCL6,EFEMP1,RHOU,KDM5B,CSF3R,PLS1,TRIM6,PIK3CA,NCOA3,VAMP7,BBS2,MACF1,CLIP1,PER2,PRKAA1,FLOT2,NUMB,KIDINS220,SPRY2,BMPR1B,FGD4,BBS4,SSH2,ERBB2,PRKACB,LIMD1,RASA1,FBXO38,IGFBP3,DOCK1,FOXO1,EPS8,NCK1,ABR,ITGB2,JAK1,PDLIM5,PRICKLE2,SPRY1,CITED2,BRWD3,HIF1AN,MECP2,AKAP13,MTM1,EIF2AK3,NDNF,PTPRM,NR2F1,RPS6KA3,NCM…
GO:0001841	0.000824524	3.96807	2.47121	9	100	neural tube formation	0.0234208	ENSG00000072062,ENSG00000106078,ENSG00000120868,ENSG00000138002,ENSG00000140463,ENSG00000142875,ENSG00000149418,ENSG00000165699,ENSG00000184634	PRKACA,COBL,APAF1,IFT172,BBS4,PRKACB,ST14,TSC1,MED12
GO:0071375	0.000824889	2.5488	7.09237	17	287	cellular response to peptide hormone stimulus	0.0234208	ENSG00000004799,ENSG00000005882,ENSG00000048052,ENSG00000072062,ENSG00000108946,ENSG00000114166,ENSG00000117461,ENSG00000121879,ENSG00000132356,ENSG00000142875,ENSG00000150907,ENSG00000151422,ENSG00000165699,ENSG00000166263,ENSG00000168710,ENSG00000185591,ENSG00000204406	PDK4,PDK2,HDAC9,PRKACA,PRKAR1A,KAT2B,PIK3R3,PIK3CA,PRKAA1,PRKACB,FOXO1,FER,TSC1,STXBP4,AHCYL1,SP1,MBD5
GO:0019538	0.000878034	1.39007	130.851	161	5295	protein metabolic process	0.0246923	ENSG00000004799,ENSG00000005882,ENSG00000008086,ENSG00000042980,ENSG00000048052,ENSG00000051382,ENSG00000052795,ENSG00000055609,ENSG00000058091,ENSG00000068912,ENSG00000071242,ENSG00000072062,ENSG00000073969,ENSG00000075711,ENSG00000076108,ENSG00000077232,ENSG00000078687,ENSG00000080561,ENSG00000084234,ENSG00000088888,ENSG00000089163,ENSG00000092330,ENSG00000100271,ENSG00000100330,ENSG00000100665…	PDK4,PDK2,CDKL5,ADAM28,HDAC9,PIK3CB,FNIP2,KMT2C,CDK14,ERLEC1,RPS6KA2,PRKACA,NSF,DLG1,BAZ2A,DNAJC10,TNRC6C,MID2,APLP2,MAVS,SIRT4,TINF2,TTLL1,MTMR3,SERPINA4,DCAF11,STS,MAGT1,NDFIP2,DNAJC3,PARP4,LONP2,BFAR,TUSC3,KDM4C,RGP1,RAPGEF1,MTMR4,PRKAR1A,DTX4,BIRC2,TRPV4,SUDS3,GCNT2,COL4A3BP,LNPEP,SEC24A,BCL6,KAT2B,USP4,GALNT3,EFEMP1,RAB3GAP1,SLC25A12,DHCR24,EDEM3,KDM5B,MUC5B,VPS4B,APAF1,TRIM6,PIK3CA,NCOA3,DY…
GO:0044699	0.000880342	1.51212	319.132	345	12914	single-organism process	0.0246923	ENSG00000001561,ENSG00000001630,ENSG00000004799,ENSG00000005108,ENSG00000005882,ENSG00000006468,ENSG00000006747,ENSG00000007237,ENSG00000008086,ENSG00000008283,ENSG00000008952,ENSG00000011021,ENSG00000019186,ENSG00000021762,ENSG00000025796,ENSG00000026950,ENSG00000042980,ENSG00000046604,ENSG00000047457,ENSG00000048052,ENSG00000051382,ENSG00000052795,ENSG00000058091,ENSG00000064201,ENSG00000067064…	ENPP4,CYP51A1,PDK4,THSD7A,PDK2,ETV1,SCIN,GAS7,CDKL5,CYB561,SEC62,CLCN6,CYP24A1,OSBPL5,SEC63,BTN3A1,ADAM28,DSG2,CP,HDAC9,PIK3CB,FNIP2,CDK14,TSPAN32,IDI1,ERLEC1,RPS6KA2,PRKACA,ABCB11,NSF,SEMA3C,DLG1,BAZ2A,PPP1R12B,DNAJC10,DYNC1I2,TNRC6C,MID2,C1QTNF3,APLP2,CD82,EPS15,MAVS,SIRT4,TINF2,GABRP,SUN2,TTLL1,AP1B1,MTMR3,ABHD4,SOS2,DAAM1,SERPINA4,ARHGAP5,STS,MAGT1,NDFIP2,DNAJC3,PARP4,LONP2,BFAR,SPG11,SQLE,TU…
GO:0002931	0.000899397	7.67057	0.766075	5	31	response to ischemia	0.0250747	ENSG00000132326,ENSG00000135472,ENSG00000149428,ENSG00000173376,ENSG00000197442	PER2,FAIM2,HYOU1,NDNF,MAP3K5
GO:0019319	0.000938715	4.33128	2.02639	8	82	hexose biosynthetic process	0.0258594	ENSG00000005882,ENSG00000082196,ENSG00000114166,ENSG00000115840,ENSG00000116678,ENSG00000132326,ENSG00000150907,ENSG00000186951	PDK2,C1QTNF3,KAT2B,SLC25A12,LEPR,PER2,FOXO1,PPARA
GO:0043255	0.000938715	4.33128	2.02639	8	82	regulation of carbohydrate biosynthetic process	0.0258594	ENSG00000005882,ENSG00000082196,ENSG00000114166,ENSG00000116678,ENSG00000127334,ENSG00000150907,ENSG00000173281,ENSG00000186951	PDK2,C1QTNF3,KAT2B,LEPR,DYRK2,FOXO1,PPP1R3B,PPARA
GO:0031334	0.00094829	2.8104	5.3131	14	215	positive regulation of protein complex assembly	0.0259685	ENSG00000006747,ENSG00000052795,ENSG00000075711,ENSG00000106299,ENSG00000130779,ENSG00000151422,ENSG00000158092,ENSG00000158290,ENSG00000161905,ENSG00000164144,ENSG00000171132,ENSG00000198722,ENSG00000248905,ENSG00000273749	SCIN,FNIP2,DLG1,WASL,CLIP1,FER,NCK1,CUL4B,ALOX15,ARFIP1,PRKCE,UNC13B,FMN1,CYFIP1
GO:0010648	0.0010392	1.70551	28.7155	46	1162	negative regulation of cell communication	0.0282908	ENSG00000072062,ENSG00000075711,ENSG00000082196,ENSG00000085832,ENSG00000089163,ENSG00000103429,ENSG00000107263,ENSG00000107731,ENSG00000107816,ENSG00000108389,ENSG00000112851,ENSG00000113916,ENSG00000115145,ENSG00000129657,ENSG00000132356,ENSG00000133961,ENSG00000135090,ENSG00000135472,ENSG00000136158,ENSG00000136854,ENSG00000137486,ENSG00000138032,ENSG00000142875,ENSG00000144791,ENSG00000145715…	PRKACA,DLG1,C1QTNF3,EPS15,SIRT4,BFAR,RAPGEF1,UNC5B,LZTS2,MTMR4,ERBB2IP,BCL6,STAM2,SEC14L1,PRKAA1,NUMB,TAOK3,FAIM2,SPRY2,STXBP1,ARRB1,PPM1B,PRKACB,LIMD1,RASA1,IGFBP3,HYOU1,FOXO1,CNKSR3,DEPTOR,RAB11FIP1,NCK1,SPRY1,TSC1,ARHGAP42,HIF1AN,CD14,MTM1,MED12,BCL9L,DAPK1,STRN3,KANK2,LGR4,OTUD7B,ADRA2B
GO:0023057	0.00111487	1.69897	28.8143	46	1166	negative regulation of signaling	0.030131	ENSG00000072062,ENSG00000075711,ENSG00000082196,ENSG00000085832,ENSG00000089163,ENSG00000103429,ENSG00000107263,ENSG00000107731,ENSG00000107816,ENSG00000108389,ENSG00000112851,ENSG00000113916,ENSG00000115145,ENSG00000129657,ENSG00000132356,ENSG00000133961,ENSG00000135090,ENSG00000135472,ENSG00000136158,ENSG00000136854,ENSG00000137486,ENSG00000138032,ENSG00000142875,ENSG00000144791,ENSG00000145715…	PRKACA,DLG1,C1QTNF3,EPS15,SIRT4,BFAR,RAPGEF1,UNC5B,LZTS2,MTMR4,ERBB2IP,BCL6,STAM2,SEC14L1,PRKAA1,NUMB,TAOK3,FAIM2,SPRY2,STXBP1,ARRB1,PPM1B,PRKACB,LIMD1,RASA1,IGFBP3,HYOU1,FOXO1,CNKSR3,DEPTOR,RAB11FIP1,NCK1,SPRY1,TSC1,ARHGAP42,HIF1AN,CD14,MTM1,MED12,BCL9L,DAPK1,STRN3,KANK2,LGR4,OTUD7B,ADRA2B
GO:0033210	0.00112633	19.8704	0.222409	3	9	leptin-mediated signaling pathway	0.030131	ENSG00000116678,ENSG00000125124,ENSG00000140463	LEPR,BBS2,BBS4
GO:0070561	0.00112633	19.8704	0.222409	3	9	vitamin D receptor signaling pathway	0.030131	ENSG00000019186,ENSG00000111424,ENSG00000197256	CYP24A1,VDR,KANK2
GO:0072359	0.00118081	1.78649	22.5621	38	913	circulatory system development	0.0313937	ENSG00000005108,ENSG00000046604,ENSG00000048052,ENSG00000051382,ENSG00000071242,ENSG00000075223,ENSG00000100280,ENSG00000105855,ENSG00000107263,ENSG00000107731,ENSG00000108175,ENSG00000108946,ENSG00000113163,ENSG00000115234,ENSG00000116678,ENSG00000121879,ENSG00000136169,ENSG00000138002,ENSG00000138193,ENSG00000140199,ENSG00000140463,ENSG00000141736,ENSG00000145715,ENSG00000150907,ENSG00000154639…	THSD7A,DSG2,HDAC9,PIK3CB,RPS6KA2,SEMA3C,AP1B1,ITGB8,RAPGEF1,UNC5B,ZMIZ1,PRKAR1A,COL4A3BP,SNX17,LEPR,PIK3CA,SETDB2,IFT172,PLCE1,SLC12A6,BBS4,ERBB2,RASA1,FOXO1,CXADR,WASF2,ITGB2,JAK1,PDLIM5,CITED2,TSC1,HIF1AN,AKAP13,EIF2AK3,NDNF,PTPRM,MED12,PPARA
GO:0036498	0.0011871	4.74606	1.631	7	66	IRE1-mediated unfolded protein response	0.0313937	ENSG00000008952,ENSG00000025796,ENSG00000102580,ENSG00000103429,ENSG00000149428,ENSG00000182934,ENSG00000198380	SEC62,SEC63,DNAJC3,BFAR,HYOU1,SRPR,GFPT1
GO:0007034	0.00124988	2.52588	6.72169	16	272	vacuolar transport	0.0326807	ENSG00000085832,ENSG00000107185,ENSG00000107862,ENSG00000108774,ENSG00000115145,ENSG00000115234,ENSG00000115561,ENSG00000119396,ENSG00000119541,ENSG00000124333,ENSG00000141252,ENSG00000151502,ENSG00000160695,ENSG00000166747,ENSG00000171100,ENSG00000178996	EPS15,RGP1,GBF1,RAB5C,STAM2,SNX17,CHMP3,RAB14,VPS4B,VAMP7,VPS53,VPS26B,VPS11,AP1G1,MTM1,SNX18
GO:0036092	0.00125032	5.57349	1.21089	6	49	phosphatidylinositol-3-phosphate biosynthetic process	0.0326807	ENSG00000051382,ENSG00000109452,ENSG00000117461,ENSG00000121879,ENSG00000133056,ENSG00000159082	PIK3CB,INPP4B,PIK3R3,PIK3CA,PIK3C2B,SYNJ1
GO:0046474	0.00125695	2.99981	4.27519	12	173	glycerophospholipid biosynthetic process	0.0326807	ENSG00000051382,ENSG00000100330,ENSG00000108389,ENSG00000109452,ENSG00000117461,ENSG00000121879,ENSG00000133056,ENSG00000143393,ENSG00000150867,ENSG00000159082,ENSG00000161905,ENSG00000171100	PIK3CB,MTMR3,MTMR4,INPP4B,PIK3R3,PIK3CA,PIK3C2B,PI4KB,PIP4K2A,SYNJ1,ALOX15,MTM1
GO:0031532	0.00128312	4.10815	2.12524	8	86	actin cytoskeleton reorganization	0.0329904	ENSG00000111199,ENSG00000111348,ENSG00000141503,ENSG00000151422,ENSG00000151491,ENSG00000154639,ENSG00000198087,ENSG00000198752	TRPV4,ARHGDIB,MINK1,FER,EPS8,CXADR,CD2AP,CDC42BPB
GO:0046364	0.00128312	4.10815	2.12524	8	86	monosaccharide biosynthetic process	0.0329904	ENSG00000005882,ENSG00000082196,ENSG00000114166,ENSG00000115840,ENSG00000116678,ENSG00000132326,ENSG00000150907,ENSG00000186951	PDK2,C1QTNF3,KAT2B,SLC25A12,LEPR,PER2,FOXO1,PPARA
GO:0010810	0.00132071	2.98111	4.2999	12	174	regulation of cell-substrate adhesion	0.0337015	ENSG00000051382,ENSG00000111846,ENSG00000113916,ENSG00000127603,ENSG00000141503,ENSG00000145715,ENSG00000150760,ENSG00000161905,ENSG00000165699,ENSG00000171132,ENSG00000173376,ENSG00000248905	PIK3CB,GCNT2,BCL6,MACF1,MINK1,RASA1,DOCK1,ALOX15,TSC1,PRKCE,NDNF,FMN1
GO:0043065	0.00132534	2.01483	13.6411	26	552	positive regulation of apoptotic process	0.0337015	ENSG00000006747,ENSG00000071242,ENSG00000100485,ENSG00000111424,ENSG00000111707,ENSG00000113916,ENSG00000120868,ENSG00000126217,ENSG00000131089,ENSG00000131653,ENSG00000137486,ENSG00000138696,ENSG00000139132,ENSG00000146674,ENSG00000150907,ENSG00000158092,ENSG00000159842,ENSG00000170776,ENSG00000172071,ENSG00000172667,ENSG00000182782,ENSG00000196730,ENSG00000196914,ENSG00000197442,ENSG00000198722…	SCIN,RPS6KA2,SOS2,VDR,SUDS3,BCL6,APAF1,MCF2L,ARHGEF9,TRAF7,ARRB1,BMPR1B,FGD4,IGFBP3,FOXO1,NCK1,ABR,AKAP13,EIF2AK3,ZMAT3,HCAR2,DAPK1,ARHGEF12,MAP3K5,UNC13B,TGM2
GO:0044262	0.00138876	2.58768	6.15331	15	249	cellular carbohydrate metabolic process	0.0351212	ENSG00000004799,ENSG00000005882,ENSG00000082196,ENSG00000114166,ENSG00000116678,ENSG00000127334,ENSG00000132326,ENSG00000146674,ENSG00000150907,ENSG00000159082,ENSG00000169057,ENSG00000171132,ENSG00000173281,ENSG00000186951,ENSG00000257335	PDK4,PDK2,C1QTNF3,KAT2B,LEPR,DYRK2,PER2,IGFBP3,FOXO1,SYNJ1,MECP2,PRKCE,PPP1R3B,PPARA,MGAM
GO:0048731	0.00139725	1.39577	102.975	130	4167	system development	0.0351439	ENSG00000005108,ENSG00000006468,ENSG00000006747,ENSG00000007237,ENSG00000008086,ENSG00000025796,ENSG00000046604,ENSG00000048052,ENSG00000051382,ENSG00000071242,ENSG00000072062,ENSG00000075223,ENSG00000075711,ENSG00000100280,ENSG00000100592,ENSG00000100852,ENSG00000104133,ENSG00000105738,ENSG00000105855,ENSG00000106078,ENSG00000107263,ENSG00000107731,ENSG00000107798,ENSG00000107816,ENSG00000108175…	THSD7A,ETV1,SCIN,GAS7,CDKL5,SEC63,DSG2,HDAC9,PIK3CB,RPS6KA2,PRKACA,SEMA3C,DLG1,AP1B1,DAAM1,ARHGAP5,SPG11,SIPA1L3,ITGB8,COBL,RAPGEF1,UNC5B,LIPA,LZTS2,ZMIZ1,RAI1,PRKAR1A,BIRC2,TRPV4,VDR,SUDS3,GCNT2,COL4A3BP,BCL6,SNX17,EFEMP1,RAB3GAP1,DHCR24,LEPR,KDM5B,CSF3R,HOXB5,KIAA1217,APAF1,PIK3CA,NCOA3,VAMP7,BBS2,HIVEP3,MACF1,CLIP1,PER2,PRKAA1,NUMB,KIDINS220,FAIM2,SPRY2,SETDB2,RAPGEF5,STXBP1,ARRB1,IFT172,PLCE1…
GO:0065008	0.00143182	1.4218	84.6636	110	3426	regulation of biological quality	0.0358188	ENSG00000001561,ENSG00000004799,ENSG00000005882,ENSG00000006747,ENSG00000008086,ENSG00000011021,ENSG00000046604,ENSG00000047457,ENSG00000051382,ENSG00000064201,ENSG00000071242,ENSG00000072062,ENSG00000075223,ENSG00000075711,ENSG00000077232,ENSG00000082196,ENSG00000089163,ENSG00000092330,ENSG00000100242,ENSG00000100439,ENSG00000106299,ENSG00000107798,ENSG00000108946,ENSG00000110324,ENSG00000111199…	ENPP4,PDK4,PDK2,SCIN,CDKL5,CLCN6,DSG2,CP,PIK3CB,TSPAN32,RPS6KA2,PRKACA,SEMA3C,DLG1,DNAJC10,C1QTNF3,SIRT4,TINF2,SUN2,ABHD4,WASL,LIPA,PRKAR1A,IL10RA,TRPV4,VDR,GCNT2,COL4A3BP,LNPEP,SEC24A,TXNDC15,BCL6,USP4,PLSCR4,RAB3GAP1,RHOU,LEPR,ANKRD13C,TJP2,PLS1,TRIM6,PIK3CA,VAMP7,BBS2,MACF1,LDLR,HSD17B7,PER2,PRKAA1,FLOT2,STXBP1,ARRB1,PLCE1,TMOD3,FGD4,BBS4,SSH2,PRKACB,LIMD1,RASA1,DOCK1,FOXO1,THRB,FER,EPS8,CXADR…
GO:0032880	0.00149167	1.76095	22.8587	38	925	regulation of protein localization	0.0371154	ENSG00000068912,ENSG00000072062,ENSG00000075711,ENSG00000082196,ENSG00000088888,ENSG00000089163,ENSG00000102471,ENSG00000106299,ENSG00000107816,ENSG00000107862,ENSG00000111199,ENSG00000113615,ENSG00000116574,ENSG00000119396,ENSG00000120756,ENSG00000121236,ENSG00000124333,ENSG00000127334,ENSG00000132326,ENSG00000133961,ENSG00000137486,ENSG00000138032,ENSG00000141736,ENSG00000143457,ENSG00000156675…	ERLEC1,PRKACA,DLG1,C1QTNF3,MAVS,SIRT4,NDFIP2,WASL,LZTS2,GBF1,TRPV4,SEC24A,RHOU,RAB14,PLS1,TRIM6,VAMP7,DYRK2,PER2,NUMB,ARRB1,PPM1B,ERBB2,GOLPH3L,RAB11FIP1,VPS11,ARFIP1,STXBP4,CD14,KCNS3,PRKCE,EIF2AK3,HCAR2,CD2AP,UNC13B,SREBF2,LGR4,OTUD7B
GO:0043068	0.00150448	1.99523	13.7646	26	557	positive regulation of programmed cell death	0.037198	ENSG00000006747,ENSG00000071242,ENSG00000100485,ENSG00000111424,ENSG00000111707,ENSG00000113916,ENSG00000120868,ENSG00000126217,ENSG00000131089,ENSG00000131653,ENSG00000137486,ENSG00000138696,ENSG00000139132,ENSG00000146674,ENSG00000150907,ENSG00000158092,ENSG00000159842,ENSG00000170776,ENSG00000172071,ENSG00000172667,ENSG00000182782,ENSG00000196730,ENSG00000196914,ENSG00000197442,ENSG00000198722…	SCIN,RPS6KA2,SOS2,VDR,SUDS3,BCL6,APAF1,MCF2L,ARHGEF9,TRAF7,ARRB1,BMPR1B,FGD4,IGFBP3,FOXO1,NCK1,ABR,AKAP13,EIF2AK3,ZMAT3,HCAR2,DAPK1,ARHGEF12,MAP3K5,UNC13B,TGM2
GO:0008219	0.00151107	1.53607	46.7553	67	1892	cell death	0.037198	ENSG00000004799,ENSG00000005882,ENSG00000006747,ENSG00000052795,ENSG00000071242,ENSG00000077232,ENSG00000089163,ENSG00000100485,ENSG00000102580,ENSG00000102699,ENSG00000103429,ENSG00000106052,ENSG00000107731,ENSG00000110330,ENSG00000111424,ENSG00000111707,ENSG00000113916,ENSG00000115561,ENSG00000116133,ENSG00000118454,ENSG00000119541,ENSG00000120868,ENSG00000121879,ENSG00000126217,ENSG00000127334…	PDK4,PDK2,SCIN,FNIP2,RPS6KA2,DNAJC10,SIRT4,SOS2,DNAJC3,PARP4,BFAR,TAX1BP1,UNC5B,BIRC2,VDR,SUDS3,BCL6,CHMP3,DHCR24,ANKRD13C,VPS4B,APAF1,PIK3CA,MCF2L,DYRK2,ARHGEF9,TRAF7,PRKAA1,PNPLA8,FAIM2,SPRY2,STXBP1,ARRB1,SHF,BMPR1B,FGD4,GULP1,RASA1,IGFBP3,HYOU1,DOCK1,FOXO1,MAGI1,DEPTOR,BRE,NCK1,ABR,ITGB2,CITED2,TSC1,MECP2,CD14,AKAP13,PRKCE,EIF2AK3,ZMAT3,NDNF,RPS6KA3,HCAR2,PPARA,DAPK1,ARHGEF12,KANK2,MAP3K5,UNC1…
GO:0031347	0.00152121	1.91647	15.9887	29	647	regulation of defense response	0.0372494	ENSG00000064201,ENSG00000072062,ENSG00000082196,ENSG00000088888,ENSG00000100280,ENSG00000110330,ENSG00000111199,ENSG00000112851,ENSG00000113916,ENSG00000115594,ENSG00000121236,ENSG00000124333,ENSG00000129657,ENSG00000130164,ENSG00000138032,ENSG00000142875,ENSG00000157625,ENSG00000159842,ENSG00000160255,ENSG00000162434,ENSG00000166747,ENSG00000170458,ENSG00000171132,ENSG00000175115,ENSG00000177189…	TSPAN32,PRKACA,C1QTNF3,MAVS,AP1B1,BIRC2,TRPV4,ERBB2IP,BCL6,IL1R1,TRIM6,VAMP7,SEC14L1,LDLR,PPM1B,PRKACB,TAB3,ABR,ITGB2,JAK1,AP1G1,CD14,PRKCE,PACS1,RPS6KA3,BCR,PPARA,TGM2,LGR4
GO:1901653	0.00154222	2.39528	7.51248	17	304	cellular response to peptide	0.0375652	ENSG00000004799,ENSG00000005882,ENSG00000048052,ENSG00000072062,ENSG00000108946,ENSG00000114166,ENSG00000117461,ENSG00000121879,ENSG00000132356,ENSG00000142875,ENSG00000150907,ENSG00000151422,ENSG00000165699,ENSG00000166263,ENSG00000168710,ENSG00000185591,ENSG00000204406	PDK4,PDK2,HDAC9,PRKACA,PRKAR1A,KAT2B,PIK3R3,PIK3CA,PRKAA1,PRKACB,FOXO1,FER,TSC1,STXBP4,AHCYL1,SP1,MBD5
GO:0043555	0.00157561	9.36736	0.518954	4	21	regulation of translation in response to stress	0.037613	ENSG00000102580,ENSG00000158092,ENSG00000172071,ENSG00000177189	DNAJC3,NCK1,EIF2AK3,RPS6KA3
GO:0035871	0.00157965	17.0307	0.247121	3	10	protein K11-linked deubiquitination	0.037613	ENSG00000135093,ENSG00000175073,ENSG00000264522	USP30,VCPIP1,OTUD7B
GO:0043312	0.00157965	17.0307	0.247121	3	10	neutrophil degranulation	0.037613	ENSG00000124333,ENSG00000159842,ENSG00000186716	VAMP7,ABR,BCR
GO:0097201	0.00157965	17.0307	0.247121	3	10	negative regulation of transcription from RNA polymerase II promoter in response to stress	0.037613	ENSG00000158092,ENSG00000164442,ENSG00000166135	NCK1,CITED2,HIF1AN
GO:2000785	0.00158482	6.64619	0.864923	5	35	regulation of autophagosome assembly	0.037613	ENSG00000100330,ENSG00000108239,ENSG00000115839,ENSG00000150867,ENSG00000171100	MTMR3,TBC1D12,RAB3GAP1,PIP4K2A,MTM1
GO:0051046	0.00166788	1.90366	16.0876	29	651	regulation of secretion	0.0393823	ENSG00000006747,ENSG00000073969,ENSG00000082196,ENSG00000089163,ENSG00000111199,ENSG00000113615,ENSG00000115839,ENSG00000117139,ENSG00000119541,ENSG00000121236,ENSG00000124333,ENSG00000132326,ENSG00000136854,ENSG00000137486,ENSG00000143457,ENSG00000151422,ENSG00000156675,ENSG00000159842,ENSG00000164144,ENSG00000166263,ENSG00000166747,ENSG00000170458,ENSG00000170745,ENSG00000171132,ENSG00000182782…	SCIN,NSF,C1QTNF3,SIRT4,TRPV4,SEC24A,RAB3GAP1,KDM5B,VPS4B,TRIM6,VAMP7,PER2,STXBP1,ARRB1,GOLPH3L,FER,RAB11FIP1,ABR,ARFIP1,STXBP4,AP1G1,CD14,KCNS3,PRKCE,HCAR2,BCR,UNC13B,LGR4,ADRA2B
GO:0060562	0.00171205	2.37006	7.58661	17	307	epithelial tube morphogenesis	0.0402201	ENSG00000072062,ENSG00000075711,ENSG00000106078,ENSG00000111424,ENSG00000117139,ENSG00000120868,ENSG00000136158,ENSG00000136169,ENSG00000138002,ENSG00000140463,ENSG00000142875,ENSG00000149418,ENSG00000164056,ENSG00000165699,ENSG00000184634,ENSG00000205213,ENSG00000248905	PRKACA,DLG1,COBL,VDR,KDM5B,APAF1,SPRY2,SETDB2,IFT172,BBS4,PRKACB,ST14,SPRY1,TSC1,MED12,LGR4,FMN1
GO:1902115	0.00172864	3.26356	3.28671	10	133	regulation of organelle assembly	0.0404048	ENSG00000100330,ENSG00000108239,ENSG00000115839,ENSG00000119541,ENSG00000140463,ENSG00000150867,ENSG00000160695,ENSG00000170776,ENSG00000171100,ENSG00000184640	MTMR3,TBC1D12,RAB3GAP1,VPS4B,BBS4,PIP4K2A,VPS11,AKAP13,MTM1,SEPT9
GO:1902532	0.00177734	2.10178	11.0463	22	447	negative regulation of intracellular signal transduction	0.0411882	ENSG00000075711,ENSG00000082196,ENSG00000107263,ENSG00000112851,ENSG00000113916,ENSG00000129657,ENSG00000132356,ENSG00000135090,ENSG00000136158,ENSG00000137486,ENSG00000138032,ENSG00000144791,ENSG00000145715,ENSG00000149428,ENSG00000150907,ENSG00000153721,ENSG00000155792,ENSG00000164056,ENSG00000165699,ENSG00000165895,ENSG00000171100,ENSG00000264522	DLG1,C1QTNF3,RAPGEF1,ERBB2IP,BCL6,SEC14L1,PRKAA1,TAOK3,SPRY2,ARRB1,PPM1B,LIMD1,RASA1,HYOU1,FOXO1,CNKSR3,DEPTOR,SPRY1,TSC1,ARHGAP42,MTM1,OTUD7B
GO:0036493	0.00179776	79.3122	0.0741363	2	3	positive regulation of translation in response to endoplasmic reticulum stress	0.0411882	ENSG00000102580,ENSG00000158092	DNAJC3,NCK1
GO:0060313	0.00179776	79.3122	0.0741363	2	3	negative regulation of blood vessel remodeling	0.0411882	ENSG00000159842,ENSG00000186716	ABR,BCR
GO:1902564	0.00179776	79.3122	0.0741363	2	3	negative regulation of neutrophil activation	0.0411882	ENSG00000159842,ENSG00000186716	ABR,BCR
GO:0006471	0.00188856	8.84641	0.543666	4	22	protein ADP-ribosylation	0.0428444	ENSG00000089163,ENSG00000092330,ENSG00000102699,ENSG00000114166	SIRT4,TINF2,PARP4,KAT2B
GO:0097186	0.00188856	8.84641	0.543666	4	22	amelogenesis	0.0428444	ENSG00000119535,ENSG00000150907,ENSG00000166415,ENSG00000186951	CSF3R,FOXO1,WDR72,PPARA
GO:0009968	0.00191205	1.6872	26.3678	42	1067	negative regulation of signal transduction	0.0431657	ENSG00000072062,ENSG00000075711,ENSG00000082196,ENSG00000085832,ENSG00000103429,ENSG00000107263,ENSG00000107731,ENSG00000107816,ENSG00000108389,ENSG00000112851,ENSG00000113916,ENSG00000115145,ENSG00000129657,ENSG00000132356,ENSG00000133961,ENSG00000135090,ENSG00000135472,ENSG00000136158,ENSG00000137486,ENSG00000138032,ENSG00000142875,ENSG00000144791,ENSG00000145715,ENSG00000146674,ENSG00000149428…	PRKACA,DLG1,C1QTNF3,EPS15,BFAR,RAPGEF1,UNC5B,LZTS2,MTMR4,ERBB2IP,BCL6,STAM2,SEC14L1,PRKAA1,NUMB,TAOK3,FAIM2,SPRY2,ARRB1,PPM1B,PRKACB,LIMD1,RASA1,IGFBP3,HYOU1,FOXO1,CNKSR3,DEPTOR,NCK1,SPRY1,TSC1,ARHGAP42,HIF1AN,CD14,MTM1,MED12,BCL9L,DAPK1,STRN3,KANK2,LGR4,OTUD7B
GO:0007249	0.00196673	2.49044	6.37572	15	258	I-kappaB kinase/NF-kappaB signaling	0.0438081	ENSG00000080561,ENSG00000082196,ENSG00000088888,ENSG00000102471,ENSG00000110330,ENSG00000128284,ENSG00000129353,ENSG00000138032,ENSG00000139946,ENSG00000157625,ENSG00000170458,ENSG00000170776,ENSG00000171132,ENSG00000198959,ENSG00000264522	MID2,C1QTNF3,MAVS,NDFIP2,BIRC2,APOL3,SLC44A2,PPM1B,PELI2,TAB3,CD14,AKAP13,PRKCE,TGM2,OTUD7B
GO:0010605	0.00197428	1.47984	55.9235	77	2263	negative regulation of macromolecule metabolic process	0.0438081	ENSG00000048052,ENSG00000052795,ENSG00000068912,ENSG00000075711,ENSG00000076108,ENSG00000077232,ENSG00000078687,ENSG00000080561,ENSG00000084234,ENSG00000089163,ENSG00000092330,ENSG00000100665,ENSG00000102471,ENSG00000102580,ENSG00000105855,ENSG00000107185,ENSG00000107263,ENSG00000108946,ENSG00000110330,ENSG00000111199,ENSG00000111424,ENSG00000111707,ENSG00000111727,ENSG00000113916,ENSG00000114166…	HDAC9,FNIP2,ERLEC1,DLG1,BAZ2A,DNAJC10,TNRC6C,MID2,APLP2,SIRT4,TINF2,SERPINA4,NDFIP2,DNAJC3,ITGB8,RGP1,RAPGEF1,PRKAR1A,BIRC2,TRPV4,VDR,SUDS3,HCFC2,BCL6,KAT2B,USP4,DHCR24,ETV3,KDM5B,RCOR3,IRF2BPL,TRIM6,BBS2,LDLR,PER2,FLOT2,TAOK3,SPRY2,SETDB2,IGF2BP3,ARRB1,BBS4,LIMD1,IGFBP3,FOXO1,CRIM1,THRB,CNKSR3,JAZF1,USP25,DEPTOR,NCK1,SPRY1,CITED2,ZHX1,TSC1,HIF1AN,IRF2,MECP2,MTM1,PRKCE,ZNF217,EIF2AK3,PHF8,NR2F1,R…
GO:0002433	0.00198072	3.8133	2.27351	8	92	immune response-regulating cell surface receptor signaling pathway involved in phagocytosis	0.0438081	ENSG00000051382,ENSG00000106299,ENSG00000121879,ENSG00000150760,ENSG00000158092,ENSG00000158195,ENSG00000171132,ENSG00000273749	PIK3CB,WASL,PIK3CA,DOCK1,NCK1,WASF2,PRKCE,CYFIP1
GO:0038096	0.00198072	3.8133	2.27351	8	92	Fc-gamma receptor signaling pathway involved in phagocytosis	0.0438081	ENSG00000051382,ENSG00000106299,ENSG00000121879,ENSG00000150760,ENSG00000158092,ENSG00000158195,ENSG00000171132,ENSG00000273749	PIK3CB,WASL,PIK3CA,DOCK1,NCK1,WASF2,PRKCE,CYFIP1
GO:0009719	0.00198784	1.57833	37.0929	55	1501	response to endogenous stimulus	0.0438081	ENSG00000004799,ENSG00000005882,ENSG00000046604,ENSG00000048052,ENSG00000072062,ENSG00000107263,ENSG00000108389,ENSG00000108946,ENSG00000110330,ENSG00000111199,ENSG00000111424,ENSG00000111846,ENSG00000112851,ENSG00000114166,ENSG00000114331,ENSG00000115339,ENSG00000116133,ENSG00000116678,ENSG00000117139,ENSG00000117461,ENSG00000119396,ENSG00000120868,ENSG00000121879,ENSG00000124151,ENSG00000125124…	PDK4,PDK2,DSG2,HDAC9,PRKACA,RAPGEF1,MTMR4,PRKAR1A,BIRC2,TRPV4,VDR,GCNT2,ERBB2IP,KAT2B,ACAP2,GALNT3,DHCR24,LEPR,KDM5B,PIK3R3,RAB14,APAF1,PIK3CA,NCOA3,BBS2,PRKAA1,KIDINS220,SPRY2,BMPR1B,BBS4,ERBB2,PRKACB,FOXO1,THRB,FER,ITGB2,SPRY1,CITED2,TSC1,STXBP4,AHCYL1,SLC33A1,TMED10,AKAP13,PRKCE,NR2F1,MED12,SMYD3,SP1,BCL9L,PPARA,STRN3,KANK2,SREBF2,MBD5
GO:0032869	0.00202432	2.82263	4.52231	12	183	cellular response to insulin stimulus	0.0443957	ENSG00000004799,ENSG00000005882,ENSG00000048052,ENSG00000114166,ENSG00000117461,ENSG00000121879,ENSG00000132356,ENSG00000150907,ENSG00000151422,ENSG00000165699,ENSG00000166263,ENSG00000185591	PDK4,PDK2,HDAC9,KAT2B,PIK3R3,PIK3CA,PRKAA1,FOXO1,FER,TSC1,STXBP4,SP1
GO:0035148	0.00204046	3.18526	3.36084	10	136	tube formation	0.0443957	ENSG00000072062,ENSG00000106078,ENSG00000120868,ENSG00000138002,ENSG00000140463,ENSG00000142875,ENSG00000149418,ENSG00000165699,ENSG00000184634,ENSG00000198959	PRKACA,COBL,APAF1,IFT172,BBS4,PRKACB,ST14,TSC1,MED12,TGM2
GO:0022607	0.00204328	1.45684	62.1509	84	2515	cellular component assembly	0.0443957	ENSG00000006747,ENSG00000052795,ENSG00000072062,ENSG00000073969,ENSG00000075711,ENSG00000082196,ENSG00000085832,ENSG00000092330,ENSG00000100271,ENSG00000100330,ENSG00000106078,ENSG00000106299,ENSG00000107263,ENSG00000107816,ENSG00000108239,ENSG00000108946,ENSG00000110330,ENSG00000111199,ENSG00000113282,ENSG00000113615,ENSG00000114316,ENSG00000115145,ENSG00000115561,ENSG00000115839,ENSG00000119396…	SCIN,FNIP2,PRKACA,NSF,DLG1,C1QTNF3,EPS15,TINF2,TTLL1,MTMR3,COBL,WASL,RAPGEF1,LZTS2,TBC1D12,PRKAR1A,BIRC2,TRPV4,CLINT1,SEC24A,USP4,STAM2,CHMP3,RAB3GAP1,RAB14,VPS4B,PLS1,APAF1,TRIM6,VAMP7,BBS2,MACF1,CLIP1,PRKAA1,FLOT2,KCTD3,STXBP1,ARRB1,IFT172,TMOD3,FGD4,LNX2,FBLN5,BBS4,SSH2,LIMD1,RASA1,PIP4K2A,MAGI1,FER,EPS8,MARVELD2,SLC7A7,NCK1,WASF2,CUL4B,SYNJ1,VPS11,ALOX15,PDLIM5,ARFIP1,TSC1,MECP2,TMED10,KCNS3,…
GO:1903530	0.00207173	1.91994	14.8273	27	600	regulation of secretion by cell	0.0448035	ENSG00000073969,ENSG00000082196,ENSG00000089163,ENSG00000111199,ENSG00000113615,ENSG00000115839,ENSG00000119541,ENSG00000121236,ENSG00000124333,ENSG00000132326,ENSG00000136854,ENSG00000137486,ENSG00000143457,ENSG00000151422,ENSG00000156675,ENSG00000159842,ENSG00000164144,ENSG00000166263,ENSG00000166747,ENSG00000170458,ENSG00000170745,ENSG00000171132,ENSG00000182782,ENSG00000186716,ENSG00000198722…	NSF,C1QTNF3,SIRT4,TRPV4,SEC24A,RAB3GAP1,VPS4B,TRIM6,VAMP7,PER2,STXBP1,ARRB1,GOLPH3L,FER,RAB11FIP1,ABR,ARFIP1,STXBP4,AP1G1,CD14,KCNS3,PRKCE,HCAR2,BCR,UNC13B,LGR4,ADRA2B
GO:0010998	0.00213239	14.901	0.271833	3	11	regulation of translational initiation by eIF2 alpha phosphorylation	0.0454778	ENSG00000102580,ENSG00000158092,ENSG00000172071	DNAJC3,NCK1,EIF2AK3
GO:0032096	0.00213239	14.901	0.271833	3	11	negative regulation of response to food	0.0454778	ENSG00000125124,ENSG00000140463,ENSG00000186951	BBS2,BBS4,PPARA
GO:0032099	0.00213239	14.901	0.271833	3	11	negative regulation of appetite	0.0454778	ENSG00000125124,ENSG00000140463,ENSG00000186951	BBS2,BBS4,PPARA
GO:0006996	0.00215485	1.41366	78.3868	102	3172	organelle organization	0.045746	ENSG00000006747,ENSG00000064201,ENSG00000071242,ENSG00000073969,ENSG00000075711,ENSG00000085832,ENSG00000088888,ENSG00000089163,ENSG00000092330,ENSG00000100242,ENSG00000100271,ENSG00000100330,ENSG00000100592,ENSG00000102910,ENSG00000105738,ENSG00000106078,ENSG00000106299,ENSG00000106789,ENSG00000107816,ENSG00000107862,ENSG00000108239,ENSG00000108946,ENSG00000111199,ENSG00000111348,ENSG00000112851…	SCIN,TSPAN32,RPS6KA2,NSF,DLG1,EPS15,MAVS,SIRT4,TINF2,SUN2,TTLL1,MTMR3,DAAM1,LONP2,SIPA1L3,COBL,WASL,CORO2A,LZTS2,GBF1,TBC1D12,PRKAR1A,TRPV4,ARHGDIB,ERBB2IP,COL4A3BP,SEC24A,BCL6,STAM2,CHMP3,RAB3GAP1,RHOU,RAB14,VPS4B,PLS1,VAMP7,BBS2,CLIP1,PIK3C2B,USP30,SPRY2,SETDB2,STXBP1,ARRB1,IFT172,PLCE1,TMOD3,FGD4,BBS4,SSH2,MINK1,GOLPH3L,LIMD1,RASA1,ARHGAP26,DOCK1,PIP4K2A,FER,EPS8,CXADR,BRE,NCK1,WASF2,CUL4B,EPB…
GO:0019318	0.00219613	2.55288	5.80734	14	235	hexose metabolic process	0.0462611	ENSG00000004799,ENSG00000005882,ENSG00000082196,ENSG00000114166,ENSG00000115840,ENSG00000116678,ENSG00000121879,ENSG00000127334,ENSG00000132326,ENSG00000132356,ENSG00000146674,ENSG00000150907,ENSG00000173281,ENSG00000186951	PDK4,PDK2,C1QTNF3,KAT2B,SLC25A12,LEPR,PIK3CA,DYRK2,PER2,PRKAA1,IGFBP3,FOXO1,PPP1R3B,PPARA
GO:0010506	0.0021991	2.45961	6.44986	15	261	regulation of autophagy	0.0462611	ENSG00000051382,ENSG00000080561,ENSG00000100330,ENSG00000108239,ENSG00000115839,ENSG00000116678,ENSG00000132356,ENSG00000150867,ENSG00000150907,ENSG00000151502,ENSG00000157625,ENSG00000165699,ENSG00000171100,ENSG00000196730,ENSG00000198911	PIK3CB,MID2,MTMR3,TBC1D12,RAB3GAP1,LEPR,PRKAA1,PIP4K2A,FOXO1,VPS26B,TAB3,TSC1,MTM1,DAPK1,SREBF2
GO:0080134	0.00225044	1.6248	30.6677	47	1241	regulation of response to stress	0.047127	ENSG00000001561,ENSG00000064201,ENSG00000068912,ENSG00000072062,ENSG00000075711,ENSG00000082196,ENSG00000088888,ENSG00000100280,ENSG00000102580,ENSG00000103429,ENSG00000110330,ENSG00000111199,ENSG00000112851,ENSG00000113916,ENSG00000115594,ENSG00000121236,ENSG00000124333,ENSG00000129657,ENSG00000130164,ENSG00000135090,ENSG00000138032,ENSG00000140092,ENSG00000141503,ENSG00000142875,ENSG00000149428…	ENPP4,TSPAN32,ERLEC1,PRKACA,DLG1,C1QTNF3,MAVS,AP1B1,DNAJC3,BFAR,BIRC2,TRPV4,ERBB2IP,BCL6,IL1R1,TRIM6,VAMP7,SEC14L1,LDLR,TAOK3,PPM1B,FBLN5,MINK1,PRKACB,HYOU1,FOXO1,USP25,TAB3,BRE,NCK1,ABR,ITGB2,JAK1,TC2N,AP1G1,CD14,PRKCE,EIF2AK3,PACS1,RPS6KA3,BCR,PPARA,NBR1,MAP3K5,TGM2,BAG6,LGR4
GO:0032868	0.00228355	2.54122	5.83205	14	236	response to insulin	0.0475162	ENSG00000004799,ENSG00000005882,ENSG00000048052,ENSG00000111199,ENSG00000114166,ENSG00000117461,ENSG00000121879,ENSG00000132356,ENSG00000150907,ENSG00000151422,ENSG00000165699,ENSG00000166263,ENSG00000185591,ENSG00000186951	PDK4,PDK2,HDAC9,TRPV4,KAT2B,PIK3R3,PIK3CA,PRKAA1,FOXO1,FER,TSC1,STXBP4,SP1,PPARA
GO:0070373	0.00228956	4.88921	1.35917	6	55	negative regulation of ERK1 and ERK2 cascade	0.0475162	ENSG00000075711,ENSG00000107263,ENSG00000136158,ENSG00000137486,ENSG00000153721,ENSG00000164056	DLG1,RAPGEF1,SPRY2,ARRB1,CNKSR3,SPRY1
GO:0009725	0.00230621	1.76843	20.2886	34	821	response to hormone	0.047648	ENSG00000004799,ENSG00000005882,ENSG00000046604,ENSG00000048052,ENSG00000072062,ENSG00000108946,ENSG00000111199,ENSG00000111424,ENSG00000114166,ENSG00000116133,ENSG00000116678,ENSG00000117461,ENSG00000121879,ENSG00000124151,ENSG00000125124,ENSG00000132356,ENSG00000140463,ENSG00000142875,ENSG00000150907,ENSG00000151090,ENSG00000151422,ENSG00000165699,ENSG00000166263,ENSG00000168710,ENSG00000170776…	PDK4,PDK2,DSG2,HDAC9,PRKACA,PRKAR1A,TRPV4,VDR,KAT2B,DHCR24,LEPR,PIK3R3,PIK3CA,NCOA3,BBS2,PRKAA1,BBS4,PRKACB,FOXO1,THRB,FER,TSC1,STXBP4,AHCYL1,AKAP13,PRKCE,NR2F1,MED12,SMYD3,SP1,PPARA,STRN3,KANK2,MBD5
GO:0031668	0.00231783	2.77345	4.59645	12	186	cellular response to extracellular stimulus	0.0476752	ENSG00000004799,ENSG00000005882,ENSG00000019186,ENSG00000100330,ENSG00000111424,ENSG00000132356,ENSG00000133056,ENSG00000150907,ENSG00000165699,ENSG00000172071,ENSG00000197256,ENSG00000198911	PDK4,PDK2,CYP24A1,MTMR3,VDR,PRKAA1,PIK3C2B,FOXO1,TSC1,EIF2AK3,KANK2,SREBF2
GO:0044801	0.00242306	2.75743	4.62116	12	187	single-organism membrane fusion	0.0496191	ENSG00000073969,ENSG00000108239,ENSG00000115561,ENSG00000124333,ENSG00000135093,ENSG00000136854,ENSG00000160695,ENSG00000167202,ENSG00000171109,ENSG00000175073,ENSG00000198863,ENSG00000204634	NSF,TBC1D12,CHMP3,VAMP7,USP30,STXBP1,VPS11,TBC1D2B,MFN1,VCPIP1,RUNDC1,TBC1D8
GO:0035239	0.00243589	2.226	8.52567	18	345	tube morphogenesis	0.049662	ENSG00000072062,ENSG00000075711,ENSG00000106078,ENSG00000111424,ENSG00000117139,ENSG00000120868,ENSG00000136158,ENSG00000136169,ENSG00000138002,ENSG00000140463,ENSG00000142875,ENSG00000149418,ENSG00000164056,ENSG00000165699,ENSG00000184634,ENSG00000198959,ENSG00000205213,ENSG00000248905	PRKACA,DLG1,COBL,VDR,KDM5B,APAF1,SPRY2,SETDB2,IFT172,BBS4,PRKACB,ST14,SPRY1,TSC1,MED12,TGM2,LGR4,FMN1
GO:0003013	0.002452	2.00838	12.0595	23	488	circulatory system process	0.0497713	ENSG00000046604,ENSG00000071242,ENSG00000072062,ENSG00000111199,ENSG00000113441,ENSG00000121879,ENSG00000125124,ENSG00000132326,ENSG00000140463,ENSG00000151090,ENSG00000159023,ENSG00000159842,ENSG00000164308,ENSG00000165895,ENSG00000168710,ENSG00000169057,ENSG00000170776,ENSG00000173482,ENSG00000186716,ENSG00000186951,ENSG00000198363,ENSG00000204634,ENSG00000274286	DSG2,RPS6KA2,PRKACA,TRPV4,LNPEP,PIK3CA,BBS2,PER2,BBS4,THRB,EPB41,ABR,ERAP2,ARHGAP42,AHCYL1,MECP2,AKAP13,PTPRM,BCR,PPARA,ASPH,TBC1D8,ADRA2B
GO:0006629	0.00252198	1.59872	32.4964	49	1315	lipid metabolic process	0.0509683	ENSG00000001630,ENSG00000004799,ENSG00000005882,ENSG00000019186,ENSG00000021762,ENSG00000051382,ENSG00000067064,ENSG00000073734,ENSG00000089163,ENSG00000100330,ENSG00000100439,ENSG00000101846,ENSG00000102910,ENSG00000104549,ENSG00000105855,ENSG00000107798,ENSG00000108389,ENSG00000109452,ENSG00000111424,ENSG00000113163,ENSG00000115234,ENSG00000115425,ENSG00000116133,ENSG00000116678,ENSG00000117461…	CYP51A1,PDK4,PDK2,CYP24A1,OSBPL5,PIK3CB,IDI1,ABCB11,SIRT4,MTMR3,ABHD4,STS,LONP2,SQLE,ITGB8,LIPA,MTMR4,INPP4B,VDR,COL4A3BP,SNX17,PECR,DHCR24,LEPR,PIK3R3,PIK3CA,LDLR,HSD17B7,PER2,PRKAA1,PIK3C2B,PNPLA8,PLCE1,BBS4,ERBB2,PI4KB,PIP4K2A,JAZF1,SYNJ1,LSS,ALOX15,MECP2,MTM1,PRKCE,ARSJ,HCAR2,ACBD3,PPARA,SREBF2
GO:0032147	0.00257072	2.33992	7.21593	16	292	activation of protein kinase activity	0.0515006	ENSG00000051382,ENSG00000072062,ENSG00000075711,ENSG00000107263,ENSG00000108946,ENSG00000121879,ENSG00000131653,ENSG00000132356,ENSG00000134313,ENSG00000137486,ENSG00000138193,ENSG00000142875,ENSG00000157625,ENSG00000170776,ENSG00000197442,ENSG00000274286	PIK3CB,PRKACA,DLG1,RAPGEF1,PRKAR1A,PIK3CA,TRAF7,PRKAA1,KIDINS220,ARRB1,PLCE1,PRKACB,TAB3,AKAP13,MAP3K5,ADRA2B
GO:0051049	0.00258512	1.52442	42.6284	61	1725	regulation of transport	0.0515006	ENSG00000006747,ENSG00000011021,ENSG00000051382,ENSG00000068912,ENSG00000072062,ENSG00000073969,ENSG00000075711,ENSG00000082196,ENSG00000088888,ENSG00000089163,ENSG00000102471,ENSG00000106299,ENSG00000108239,ENSG00000108774,ENSG00000111199,ENSG00000113615,ENSG00000115234,ENSG00000115561,ENSG00000115839,ENSG00000116574,ENSG00000117139,ENSG00000117461,ENSG00000119541,ENSG00000121236,ENSG00000124333…	SCIN,CLCN6,PIK3CB,ERLEC1,PRKACA,NSF,DLG1,C1QTNF3,MAVS,SIRT4,NDFIP2,WASL,TBC1D12,RAB5C,TRPV4,SEC24A,SNX17,CHMP3,RAB3GAP1,RHOU,KDM5B,PIK3R3,VPS4B,TRIM6,VAMP7,DYRK2,PER2,PRKAA1,STXBP1,ARRB1,PPM1B,MINK1,ERBB2,CTTNBP2NL,GOLPH3L,FER,CNKSR3,RAB11FIP1,ABR,VPS11,ALOX15,ARFIP1,KCNK5,STXBP4,AP1G1,TBC1D2B,AHCYL1,CD14,KCNS3,PRKCE,HCAR2,BCR,PPARA,DAPK1,CD2AP,UNC13B,RUNDC1,SREBF2,TBC1D8,LGR4,ADRA2B
GO:0038094	0.00259149	3.63906	2.37236	8	96	Fc-gamma receptor signaling pathway	0.0515006	ENSG00000051382,ENSG00000106299,ENSG00000121879,ENSG00000150760,ENSG00000158092,ENSG00000158195,ENSG00000171132,ENSG00000273749	PIK3CB,WASL,PIK3CA,DOCK1,NCK1,WASF2,PRKCE,CYFIP1
GO:0043300	0.00259283	5.86284	0.963772	5	39	regulation of leukocyte degranulation	0.0515006	ENSG00000124333,ENSG00000151422,ENSG00000159842,ENSG00000166747,ENSG00000186716	VAMP7,FER,ABR,AP1G1,BCR
GO:0051248	0.00261085	1.67654	25.2063	40	1020	negative regulation of protein metabolic process	0.0515247	ENSG00000068912,ENSG00000075711,ENSG00000077232,ENSG00000078687,ENSG00000084234,ENSG00000089163,ENSG00000092330,ENSG00000100665,ENSG00000102580,ENSG00000107185,ENSG00000107263,ENSG00000108946,ENSG00000110330,ENSG00000114166,ENSG00000114316,ENSG00000116133,ENSG00000132326,ENSG00000132589,ENSG00000135090,ENSG00000136158,ENSG00000136231,ENSG00000137486,ENSG00000144791,ENSG00000146674,ENSG00000150907…	ERLEC1,DLG1,DNAJC10,TNRC6C,APLP2,SIRT4,TINF2,SERPINA4,DNAJC3,RGP1,RAPGEF1,PRKAR1A,BIRC2,KAT2B,USP4,DHCR24,PER2,FLOT2,TAOK3,SPRY2,IGF2BP3,ARRB1,LIMD1,IGFBP3,FOXO1,CRIM1,CNKSR3,USP25,DEPTOR,NCK1,SPRY1,TSC1,MECP2,MTM1,PRKCE,EIF2AK3,RPS6KA3,SMYD3,DAPK1,BAG6
GO:0033135	0.00263034	3.3091	2.91603	9	118	regulation of peptidyl-serine phosphorylation	0.0515247	ENSG00000052795,ENSG00000121236,ENSG00000121879,ENSG00000132356,ENSG00000136158,ENSG00000137486,ENSG00000153721,ENSG00000158092,ENSG00000185420	FNIP2,TRIM6,PIK3CA,PRKAA1,SPRY2,ARRB1,CNKSR3,NCK1,SMYD3
GO:0032104	0.00263858	7.96078	0.59309	4	24	regulation of response to extracellular stimulus	0.0515247	ENSG00000125124,ENSG00000140463,ENSG00000186951,ENSG00000197256	BBS2,BBS4,PPARA,KANK2
GO:0032107	0.00263858	7.96078	0.59309	4	24	regulation of response to nutrient levels	0.0515247	ENSG00000125124,ENSG00000140463,ENSG00000186951,ENSG00000197256	BBS2,BBS4,PPARA,KANK2
GO:0048589	0.00275296	1.92855	13.6411	25	552	developmental growth	0.0535324	ENSG00000008086,ENSG00000075223,ENSG00000104133,ENSG00000106078,ENSG00000108175,ENSG00000108557,ENSG00000108946,ENSG00000116678,ENSG00000117139,ENSG00000120756,ENSG00000121879,ENSG00000125124,ENSG00000127603,ENSG00000136158,ENSG00000138696,ENSG00000140463,ENSG00000163110,ENSG00000164056,ENSG00000171100,ENSG00000173898,ENSG00000184634,ENSG00000198399,ENSG00000204406,ENSG00000248905,ENSG00000273749	CDKL5,SEMA3C,SPG11,COBL,ZMIZ1,RAI1,PRKAR1A,LEPR,KDM5B,PLS1,PIK3CA,BBS2,MACF1,SPRY2,BMPR1B,BBS4,PDLIM5,SPRY1,MTM1,SPTBN2,MED12,ITSN2,MBD5,FMN1,CYFIP1
GO:0016082	0.00279137	13.2445	0.296545	3	12	synaptic vesicle priming	0.0536036	ENSG00000136854,ENSG00000159082,ENSG00000198722	STXBP1,SYNJ1,UNC13B
GO:0045722	0.00279137	13.2445	0.296545	3	12	positive regulation of gluconeogenesis	0.0536036	ENSG00000114166,ENSG00000150907,ENSG00000186951	KAT2B,FOXO1,PPARA
GO:2000188	0.00279137	13.2445	0.296545	3	12	regulation of cholesterol homeostasis	0.0536036	ENSG00000113615,ENSG00000130164,ENSG00000198911	SEC24A,LDLR,SREBF2
GO:0006986	0.00282925	2.85021	4.10221	11	166	response to unfolded protein	0.0541066	ENSG00000008952,ENSG00000025796,ENSG00000102580,ENSG00000103429,ENSG00000116406,ENSG00000149428,ENSG00000158092,ENSG00000172071,ENSG00000182158,ENSG00000182934,ENSG00000198380	SEC62,SEC63,DNAJC3,BFAR,EDEM3,HYOU1,NCK1,EIF2AK3,CREB3L2,SRPR,GFPT1
GO:0048523	0.00285885	1.36282	103.025	128	4169	negative regulation of cellular process	0.0544475	ENSG00000004799,ENSG00000006747,ENSG00000007237,ENSG00000048052,ENSG00000052795,ENSG00000064201,ENSG00000068912,ENSG00000071242,ENSG00000072062,ENSG00000075223,ENSG00000075711,ENSG00000076108,ENSG00000077232,ENSG00000078687,ENSG00000080561,ENSG00000082196,ENSG00000084234,ENSG00000085832,ENSG00000088888,ENSG00000089163,ENSG00000092330,ENSG00000100665,ENSG00000102580,ENSG00000103429,ENSG00000106052…	PDK4,SCIN,GAS7,HDAC9,FNIP2,TSPAN32,ERLEC1,RPS6KA2,PRKACA,SEMA3C,DLG1,BAZ2A,DNAJC10,TNRC6C,MID2,C1QTNF3,APLP2,EPS15,MAVS,SIRT4,TINF2,SERPINA4,DNAJC3,BFAR,TAX1BP1,WASL,RGP1,RAPGEF1,UNC5B,LZTS2,MTMR4,PRKAR1A,BIRC2,TRPV4,ARHGDIB,VDR,SUDS3,HCFC2,GCNT2,ERBB2IP,BCL6,KAT2B,USP4,STAM2,EFEMP1,CHMP3,DHCR24,LEPR,ETV3,KDM5B,RCOR3,VPS4B,IRF2BPL,TRIM6,PIK3CA,SEC14L1,PER2,PRKAA1,NUMB,TAOK3,FAIM2,SPRY2,SETDB2,IGF…
GO:0007041	0.00290882	3.99753	1.90283	7	77	lysosomal transport	0.0551722	ENSG00000115561,ENSG00000119541,ENSG00000124333,ENSG00000141252,ENSG00000160695,ENSG00000166747,ENSG00000171100	CHMP3,VPS4B,VAMP7,VPS53,VPS11,AP1G1,MTM1
GO:0001838	0.00294697	3.24908	2.96545	9	120	embryonic epithelial tube formation	0.0554513	ENSG00000072062,ENSG00000106078,ENSG00000120868,ENSG00000138002,ENSG00000140463,ENSG00000142875,ENSG00000149418,ENSG00000165699,ENSG00000184634	PRKACA,COBL,APAF1,IFT172,BBS4,PRKACB,ST14,TSC1,MED12
GO:0002431	0.0029475	3.55776	2.42179	8	98	Fc receptor mediated stimulatory signaling pathway	0.0554513	ENSG00000051382,ENSG00000106299,ENSG00000121879,ENSG00000150760,ENSG00000158092,ENSG00000158195,ENSG00000171132,ENSG00000273749	PIK3CB,WASL,PIK3CA,DOCK1,NCK1,WASF2,PRKCE,CYFIP1
GO:0008654	0.00296954	2.56435	5.36252	13	217	phospholipid biosynthetic process	0.0556398	ENSG00000051382,ENSG00000067064,ENSG00000100330,ENSG00000108389,ENSG00000109452,ENSG00000117461,ENSG00000121879,ENSG00000133056,ENSG00000143393,ENSG00000150867,ENSG00000159082,ENSG00000161905,ENSG00000171100	PIK3CB,IDI1,MTMR3,MTMR4,INPP4B,PIK3R3,PIK3CA,PIK3C2B,PI4KB,PIP4K2A,SYNJ1,ALOX15,MTM1
GO:1901615	0.00304044	2.08161	10.1072	20	409	organic hydroxy compound metabolic process	0.0567385	ENSG00000001630,ENSG00000019186,ENSG00000021762,ENSG00000067064,ENSG00000104549,ENSG00000109452,ENSG00000111424,ENSG00000115234,ENSG00000115425,ENSG00000116133,ENSG00000116678,ENSG00000130164,ENSG00000132196,ENSG00000132356,ENSG00000138193,ENSG00000159082,ENSG00000160285,ENSG00000161905,ENSG00000169057,ENSG00000198911	CYP51A1,CYP24A1,OSBPL5,IDI1,SQLE,INPP4B,VDR,SNX17,PECR,DHCR24,LEPR,LDLR,HSD17B7,PRKAA1,PLCE1,SYNJ1,LSS,ALOX15,MECP2,SREBF2
GO:0010942	0.00307972	1.88493	14.506	26	587	positive regulation of cell death	0.0572407	ENSG00000006747,ENSG00000071242,ENSG00000100485,ENSG00000111424,ENSG00000111707,ENSG00000113916,ENSG00000120868,ENSG00000126217,ENSG00000131089,ENSG00000131653,ENSG00000137486,ENSG00000138696,ENSG00000139132,ENSG00000146674,ENSG00000150907,ENSG00000158092,ENSG00000159842,ENSG00000170776,ENSG00000172071,ENSG00000172667,ENSG00000182782,ENSG00000196730,ENSG00000196914,ENSG00000197442,ENSG00000198722…	SCIN,RPS6KA2,SOS2,VDR,SUDS3,BCL6,APAF1,MCF2L,ARHGEF9,TRAF7,ARRB1,BMPR1B,FGD4,IGFBP3,FOXO1,NCK1,ABR,AKAP13,EIF2AK3,ZMAT3,HCAR2,DAPK1,ARHGEF12,MAP3K5,UNC13B,TGM2
GO:0072175	0.00311619	3.21987	2.99016	9	121	epithelial tube formation	0.0576868	ENSG00000072062,ENSG00000106078,ENSG00000120868,ENSG00000138002,ENSG00000140463,ENSG00000142875,ENSG00000149418,ENSG00000165699,ENSG00000184634	PRKACA,COBL,APAF1,IFT172,BBS4,PRKACB,ST14,TSC1,MED12
GO:0009888	0.00329959	1.51032	42.233	60	1709	tissue development	0.0605321	ENSG00000006747,ENSG00000046604,ENSG00000048052,ENSG00000072062,ENSG00000075223,ENSG00000075711,ENSG00000100592,ENSG00000101846,ENSG00000105738,ENSG00000105855,ENSG00000106078,ENSG00000107263,ENSG00000108946,ENSG00000111424,ENSG00000111846,ENSG00000115380,ENSG00000116133,ENSG00000117139,ENSG00000119139,ENSG00000120075,ENSG00000120868,ENSG00000121879,ENSG00000124151,ENSG00000125124,ENSG00000127124…	SCIN,DSG2,HDAC9,PRKACA,SEMA3C,DLG1,DAAM1,STS,SIPA1L3,ITGB8,COBL,RAPGEF1,PRKAR1A,VDR,GCNT2,EFEMP1,DHCR24,KDM5B,TJP2,HOXB5,APAF1,PIK3CA,NCOA3,BBS2,HIVEP3,MLLT4,PRKAA1,FLOT2,NUMB,SPRY2,SETDB2,IFT172,BMPR1B,BBS4,PRKACB,ST14,FOXO1,THRB,MARVELD2,CXADR,ITGB2,ALOX15,PDLIM5,PRICKLE2,SPRY1,CITED2,TSC1,WDR72,KRT4,AKAP13,MTM1,EIF2AK3,CREB3L2,MED12,BCL9L,PPARA,NBR1,TGM2,LGR4,FMN1
GO:0009892	0.00339925	1.43279	60.6188	81	2453	negative regulation of metabolic process	0.0605321	ENSG00000048052,ENSG00000052795,ENSG00000068912,ENSG00000075711,ENSG00000076108,ENSG00000077232,ENSG00000078687,ENSG00000080561,ENSG00000082196,ENSG00000084234,ENSG00000089163,ENSG00000092330,ENSG00000100665,ENSG00000102471,ENSG00000102580,ENSG00000105855,ENSG00000107185,ENSG00000107263,ENSG00000108946,ENSG00000110330,ENSG00000111199,ENSG00000111424,ENSG00000111707,ENSG00000111727,ENSG00000113916…	HDAC9,FNIP2,ERLEC1,DLG1,BAZ2A,DNAJC10,TNRC6C,MID2,C1QTNF3,APLP2,SIRT4,TINF2,SERPINA4,NDFIP2,DNAJC3,ITGB8,RGP1,RAPGEF1,PRKAR1A,BIRC2,TRPV4,VDR,SUDS3,HCFC2,BCL6,KAT2B,USP4,DHCR24,LEPR,ETV3,KDM5B,RCOR3,IRF2BPL,TRIM6,BBS2,LDLR,PER2,PRKAA1,FLOT2,TAOK3,SPRY2,SETDB2,IGF2BP3,ARRB1,BBS4,LIMD1,IGFBP3,FOXO1,CRIM1,THRB,CNKSR3,JAZF1,USP25,DEPTOR,NCK1,SPRY1,CITED2,ZHX1,TSC1,HIF1AN,IRF2,MECP2,MTM1,PRKCE,ZNF217,…
GO:0005996	0.00344967	2.41959	6.10389	14	247	monosaccharide metabolic process	0.0605321	ENSG00000004799,ENSG00000005882,ENSG00000082196,ENSG00000114166,ENSG00000115840,ENSG00000116678,ENSG00000121879,ENSG00000127334,ENSG00000132326,ENSG00000132356,ENSG00000146674,ENSG00000150907,ENSG00000173281,ENSG00000186951	PDK4,PDK2,C1QTNF3,KAT2B,SLC25A12,LEPR,PIK3CA,DYRK2,PER2,PRKAA1,IGFBP3,FOXO1,PPP1R3B,PPARA
GO:0018105	0.00344967	2.41959	6.10389	14	247	peptidyl-serine phosphorylation	0.0605321	ENSG00000052795,ENSG00000071242,ENSG00000072062,ENSG00000121236,ENSG00000121879,ENSG00000132356,ENSG00000136158,ENSG00000137486,ENSG00000153721,ENSG00000158092,ENSG00000159256,ENSG00000171132,ENSG00000172071,ENSG00000185420	FNIP2,RPS6KA2,PRKACA,TRIM6,PIK3CA,PRKAA1,SPRY2,ARRB1,CNKSR3,NCK1,MORC3,PRKCE,EIF2AK3,SMYD3
GO:0032510	0.00353668	39.6537	0.0988484	2	4	endosome to lysosome transport via multivesicular body sorting pathway	0.0605321	ENSG00000115561,ENSG00000119541	CHMP3,VPS4B
GO:0035964	0.00353668	39.6537	0.0988484	2	4	COPI-coated vesicle budding	0.0605321	ENSG00000107862,ENSG00000170348	GBF1,TMED10
GO:0038028	0.00353668	39.6537	0.0988484	2	4	insulin receptor signaling pathway via phosphatidylinositol 3-kinase	0.0605321	ENSG00000121879,ENSG00000151422	PIK3CA,FER
GO:0038108	0.00353668	39.6537	0.0988484	2	4	negative regulation of appetite by leptin-mediated signaling pathway	0.0605321	ENSG00000125124,ENSG00000140463	BBS2,BBS4
GO:0043622	0.00353668	39.6537	0.0988484	2	4	cortical microtubule organization	0.0605321	ENSG00000075711,ENSG00000111199	DLG1,TRPV4
GO:0044860	0.00353668	39.6537	0.0988484	2	4	protein localization to plasma membrane raft	0.0605321	ENSG00000130779,ENSG00000132589	CLIP1,FLOT2
GO:0048200	0.00353668	39.6537	0.0988484	2	4	Golgi transport vesicle coating	0.0605321	ENSG00000107862,ENSG00000170348	GBF1,TMED10
GO:0048205	0.00353668	39.6537	0.0988484	2	4	COPI coating of Golgi vesicle	0.0605321	ENSG00000107862,ENSG00000170348	GBF1,TMED10
GO:0051387	0.00353668	39.6537	0.0988484	2	4	negative regulation of neurotrophin TRK receptor signaling pathway	0.0605321	ENSG00000136158,ENSG00000164056	SPRY2,SPRY1
GO:0061428	0.00353668	39.6537	0.0988484	2	4	negative regulation of transcription from RNA polymerase II promoter in response to hypoxia	0.0605321	ENSG00000164442,ENSG00000166135	CITED2,HIF1AN
GO:0071883	0.00353668	39.6537	0.0988484	2	4	activation of MAPK activity by adrenergic receptor signaling pathway	0.0605321	ENSG00000170776,ENSG00000274286	AKAP13,ADRA2B
GO:0072367	0.00353668	39.6537	0.0988484	2	4	regulation of lipid transport by regulation of transcription from RNA polymerase II promoter	0.0605321	ENSG00000186951,ENSG00000198911	PPARA,SREBF2
GO:0002283	0.00356274	11.9193	0.321257	3	13	neutrophil activation involved in immune response	0.0605321	ENSG00000124333,ENSG00000159842,ENSG00000186716	VAMP7,ABR,BCR
GO:0070986	0.00356274	11.9193	0.321257	3	13	left/right axis specification	0.0605321	ENSG00000136169,ENSG00000138002,ENSG00000164442	SETDB2,IFT172,CITED2
GO:0071605	0.00356274	11.9193	0.321257	3	13	monocyte chemotactic protein-1 production	0.0605321	ENSG00000082196,ENSG00000111199,ENSG00000112851	C1QTNF3,TRPV4,ERBB2IP
GO:0071637	0.00356274	11.9193	0.321257	3	13	regulation of monocyte chemotactic protein-1 production	0.0605321	ENSG00000082196,ENSG00000111199,ENSG00000112851	C1QTNF3,TRPV4,ERBB2IP
GO:0006892	0.0035666	4.43514	1.48273	6	60	post-Golgi vesicle-mediated transport	0.0605321	ENSG00000021762,ENSG00000085832,ENSG00000107862,ENSG00000119396,ENSG00000124333,ENSG00000166747	OSBPL5,EPS15,GBF1,RAB14,VAMP7,AP1G1
GO:0031338	0.0035666	4.43514	1.48273	6	60	regulation of vesicle fusion	0.0605321	ENSG00000108239,ENSG00000136854,ENSG00000160695,ENSG00000167202,ENSG00000198863,ENSG00000204634	TBC1D12,STXBP1,VPS11,TBC1D2B,RUNDC1,TBC1D8
GO:0071108	0.00357071	7.23619	0.642514	4	26	protein K48-linked deubiquitination	0.0605321	ENSG00000143409,ENSG00000155313,ENSG00000175073,ENSG00000264522	FAM63A,USP25,VCPIP1,OTUD7B
GO:0008333	0.00360634	5.38648	1.03791	5	42	endosome to lysosome transport	0.0606913	ENSG00000115561,ENSG00000119541,ENSG00000124333,ENSG00000160695,ENSG00000171100	CHMP3,VPS4B,VAMP7,VPS11,MTM1
GO:0034260	0.00360634	5.38648	1.03791	5	42	negative regulation of GTPase activity	0.0606913	ENSG00000136158,ENSG00000137486,ENSG00000140463,ENSG00000155093,ENSG00000164056	SPRY2,ARRB1,BBS4,PTPRN2,SPRY1
GO:0048584	0.00372819	1.47499	47.6449	66	1928	positive regulation of response to stimulus	0.0623155	ENSG00000001561,ENSG00000026950,ENSG00000051382,ENSG00000072062,ENSG00000080561,ENSG00000088888,ENSG00000100485,ENSG00000102471,ENSG00000106069,ENSG00000106299,ENSG00000107263,ENSG00000107731,ENSG00000110330,ENSG00000111199,ENSG00000111846,ENSG00000112851,ENSG00000115594,ENSG00000117461,ENSG00000120868,ENSG00000121236,ENSG00000121879,ENSG00000124333,ENSG00000127603,ENSG00000128284,ENSG00000129353…	ENPP4,BTN3A1,PIK3CB,PRKACA,MID2,MAVS,SOS2,NDFIP2,CHN2,WASL,RAPGEF1,UNC5B,BIRC2,TRPV4,GCNT2,ERBB2IP,IL1R1,PIK3R3,APAF1,TRIM6,PIK3CA,VAMP7,MACF1,APOL3,SLC44A2,SEC14L1,LDLR,TRAF7,PRKAA1,KIDINS220,TAOK3,SPRY2,ARRB1,IFT172,PLCE1,BMPR1B,PELI2,MINK1,ERBB2,PRKACB,IGFBP3,DOCK1,EPS8,DISP1,TAB3,BRE,NCK1,WASF2,ITGB2,ALOX15,CITED2,AP1G1,CD14,AKAP13,PRKCE,RPS6KA3,MAP3K5,ITSN2,UNC13B,RASGEF1A,TGM2,MBD5,BAG6,LGR…
GO:0006650	0.00372977	2.31608	6.82054	15	276	glycerophospholipid metabolic process	0.0623155	ENSG00000051382,ENSG00000100330,ENSG00000108389,ENSG00000109452,ENSG00000117461,ENSG00000121879,ENSG00000133056,ENSG00000135241,ENSG00000141736,ENSG00000143393,ENSG00000150867,ENSG00000159082,ENSG00000161905,ENSG00000169057,ENSG00000171100	PIK3CB,MTMR3,MTMR4,INPP4B,PIK3R3,PIK3CA,PIK3C2B,PNPLA8,ERBB2,PI4KB,PIP4K2A,SYNJ1,ALOX15,MECP2,MTM1
GO:0046165	0.00377299	3.40552	2.52063	8	102	alcohol biosynthetic process	0.0628108	ENSG00000001630,ENSG00000067064,ENSG00000104549,ENSG00000111424,ENSG00000116133,ENSG00000132196,ENSG00000132356,ENSG00000160285	CYP51A1,IDI1,SQLE,VDR,DHCR24,HSD17B7,PRKAA1,LSS
GO:0006886	0.00389478	1.64452	24.9839	39	1011	intracellular protein transport	0.0646058	ENSG00000008952,ENSG00000025796,ENSG00000062725,ENSG00000068912,ENSG00000072062,ENSG00000073969,ENSG00000082196,ENSG00000088888,ENSG00000089163,ENSG00000100280,ENSG00000102910,ENSG00000108239,ENSG00000112851,ENSG00000113615,ENSG00000113916,ENSG00000115145,ENSG00000115234,ENSG00000116574,ENSG00000124333,ENSG00000127334,ENSG00000130779,ENSG00000138032,ENSG00000141736,ENSG00000151502,ENSG00000160294…	SEC62,SEC63,APPBP2,ERLEC1,PRKACA,NSF,C1QTNF3,MAVS,SIRT4,AP1B1,LONP2,TBC1D12,ERBB2IP,SEC24A,BCL6,STAM2,SNX17,RHOU,VAMP7,DYRK2,CLIP1,PPM1B,ERBB2,VPS26B,MCM3AP,VPS11,ARFIP1,STXBP4,AP1G1,TBC1D2B,AHCYL1,TMED10,PACS1,SNX18,SRPR,RUNDC1,SREBF2,TBC1D8,SYNRG
GO:0043434	0.00397763	2.07054	9.63772	19	390	response to peptide hormone	0.0657445	ENSG00000004799,ENSG00000005882,ENSG00000048052,ENSG00000072062,ENSG00000108946,ENSG00000111199,ENSG00000114166,ENSG00000117461,ENSG00000121879,ENSG00000132356,ENSG00000142875,ENSG00000150907,ENSG00000151422,ENSG00000165699,ENSG00000166263,ENSG00000168710,ENSG00000185591,ENSG00000186951,ENSG00000204406	PDK4,PDK2,HDAC9,PRKACA,PRKAR1A,TRPV4,KAT2B,PIK3R3,PIK3CA,PRKAA1,PRKACB,FOXO1,FER,TSC1,STXBP4,AHCYL1,SP1,PPARA,MBD5
GO:1903305	0.00400485	3.36946	2.54535	8	103	regulation of regulated secretory pathway	0.0659405	ENSG00000115839,ENSG00000124333,ENSG00000136854,ENSG00000151422,ENSG00000159842,ENSG00000166747,ENSG00000186716,ENSG00000198722	RAB3GAP1,VAMP7,STXBP1,FER,ABR,AP1G1,BCR,UNC13B
GO:0046488	0.00401798	2.57856	4.91771	12	199	phosphatidylinositol metabolic process	0.0659405	ENSG00000051382,ENSG00000100330,ENSG00000108389,ENSG00000109452,ENSG00000117461,ENSG00000121879,ENSG00000133056,ENSG00000141736,ENSG00000143393,ENSG00000150867,ENSG00000159082,ENSG00000171100	PIK3CB,MTMR3,MTMR4,INPP4B,PIK3R3,PIK3CA,PIK3C2B,ERBB2,PI4KB,PIP4K2A,SYNJ1,MTM1
GO:0048193	0.00419153	2.21722	7.58661	16	307	Golgi vesicle transport	0.068518	ENSG00000021762,ENSG00000073969,ENSG00000077380,ENSG00000085832,ENSG00000107862,ENSG00000113615,ENSG00000119396,ENSG00000124333,ENSG00000134970,ENSG00000143457,ENSG00000149428,ENSG00000166747,ENSG00000170348,ENSG00000173898,ENSG00000175115,ENSG00000182158	OSBPL5,NSF,DYNC1I2,EPS15,GBF1,SEC24A,RAB14,VAMP7,TMED7,GOLPH3L,HYOU1,AP1G1,TMED10,SPTBN2,PACS1,CREB3L2
GO:0044283	0.00420465	1.94628	11.8618	22	480	small molecule biosynthetic process	0.068518	ENSG00000001630,ENSG00000004799,ENSG00000005882,ENSG00000067064,ENSG00000073734,ENSG00000082196,ENSG00000104549,ENSG00000111424,ENSG00000114166,ENSG00000115425,ENSG00000115840,ENSG00000116133,ENSG00000116678,ENSG00000132196,ENSG00000132326,ENSG00000132356,ENSG00000135241,ENSG00000150907,ENSG00000160285,ENSG00000161905,ENSG00000186951,ENSG00000188641	CYP51A1,PDK4,PDK2,IDI1,ABCB11,C1QTNF3,SQLE,VDR,KAT2B,PECR,SLC25A12,DHCR24,LEPR,HSD17B7,PER2,PRKAA1,PNPLA8,FOXO1,LSS,ALOX15,PPARA,DPYD
GO:0006915	0.00432249	1.48455	43.6168	61	1765	apoptotic process	0.0701912	ENSG00000004799,ENSG00000005882,ENSG00000006747,ENSG00000052795,ENSG00000071242,ENSG00000077232,ENSG00000089163,ENSG00000100485,ENSG00000102580,ENSG00000103429,ENSG00000106052,ENSG00000107731,ENSG00000110330,ENSG00000111424,ENSG00000111707,ENSG00000113916,ENSG00000115561,ENSG00000116133,ENSG00000118454,ENSG00000120868,ENSG00000121879,ENSG00000126217,ENSG00000127334,ENSG00000131089,ENSG00000131653…	PDK4,PDK2,SCIN,FNIP2,RPS6KA2,DNAJC10,SIRT4,SOS2,DNAJC3,BFAR,TAX1BP1,UNC5B,BIRC2,VDR,SUDS3,BCL6,CHMP3,DHCR24,ANKRD13C,APAF1,PIK3CA,MCF2L,DYRK2,ARHGEF9,TRAF7,PRKAA1,FAIM2,SPRY2,STXBP1,ARRB1,SHF,BMPR1B,FGD4,GULP1,RASA1,IGFBP3,HYOU1,DOCK1,FOXO1,DEPTOR,BRE,NCK1,ABR,ITGB2,CITED2,MECP2,CD14,AKAP13,PRKCE,EIF2AK3,ZMAT3,NDNF,RPS6KA3,HCAR2,DAPK1,ARHGEF12,KANK2,MAP3K5,UNC13B,TGM2,BAG6
GO:0006694	0.00434616	2.84376	3.73153	10	151	steroid biosynthetic process	0.0703288	ENSG00000001630,ENSG00000067064,ENSG00000073734,ENSG00000104549,ENSG00000111424,ENSG00000116133,ENSG00000132196,ENSG00000132356,ENSG00000160285,ENSG00000182827	CYP51A1,IDI1,ABCB11,SQLE,VDR,DHCR24,HSD17B7,PRKAA1,LSS,ACBD3
GO:0006461	0.00440251	1.54165	34.2757	50	1387	protein complex assembly	0.0705793	ENSG00000006747,ENSG00000052795,ENSG00000073969,ENSG00000075711,ENSG00000082196,ENSG00000085832,ENSG00000106078,ENSG00000106299,ENSG00000110330,ENSG00000111199,ENSG00000113282,ENSG00000113615,ENSG00000115561,ENSG00000120868,ENSG00000121236,ENSG00000124333,ENSG00000130779,ENSG00000132356,ENSG00000136636,ENSG00000136854,ENSG00000138594,ENSG00000139517,ENSG00000140463,ENSG00000145715,ENSG00000151276…	SCIN,FNIP2,NSF,DLG1,C1QTNF3,EPS15,COBL,WASL,BIRC2,TRPV4,CLINT1,SEC24A,CHMP3,APAF1,TRIM6,VAMP7,CLIP1,PRKAA1,KCTD3,STXBP1,TMOD3,LNX2,BBS4,RASA1,MAGI1,FER,EPS8,SLC7A7,NCK1,CUL4B,SYNJ1,VPS11,ALOX15,ARFIP1,TSC1,TMED10,KCNS3,PRKCE,EIF2AK3,SPTBN2,SEPT9,SMYD3,BCL9L,NBR1,CD2AP,ATL1,UNC13B,TGM2,FMN1,CYFIP1
GO:0070271	0.00440251	1.54165	34.2757	50	1387	protein complex biogenesis	0.0705793	ENSG00000006747,ENSG00000052795,ENSG00000073969,ENSG00000075711,ENSG00000082196,ENSG00000085832,ENSG00000106078,ENSG00000106299,ENSG00000110330,ENSG00000111199,ENSG00000113282,ENSG00000113615,ENSG00000115561,ENSG00000120868,ENSG00000121236,ENSG00000124333,ENSG00000130779,ENSG00000132356,ENSG00000136636,ENSG00000136854,ENSG00000138594,ENSG00000139517,ENSG00000140463,ENSG00000145715,ENSG00000151276…	SCIN,FNIP2,NSF,DLG1,C1QTNF3,EPS15,COBL,WASL,BIRC2,TRPV4,CLINT1,SEC24A,CHMP3,APAF1,TRIM6,VAMP7,CLIP1,PRKAA1,KCTD3,STXBP1,TMOD3,LNX2,BBS4,RASA1,MAGI1,FER,EPS8,SLC7A7,NCK1,CUL4B,SYNJ1,VPS11,ALOX15,ARFIP1,TSC1,TMED10,KCNS3,PRKCE,EIF2AK3,SPTBN2,SEPT9,SMYD3,BCL9L,NBR1,CD2AP,ATL1,UNC13B,TGM2,FMN1,CYFIP1
GO:0007029	0.00442264	5.10962	1.08733	5	44	endoplasmic reticulum organization	0.0705793	ENSG00000113163,ENSG00000115839,ENSG00000172071,ENSG00000198513,ENSG00000204463	COL4A3BP,RAB3GAP1,EIF2AK3,ATL1,BAG6
GO:0045123	0.00442264	5.10962	1.08733	5	44	cellular extravasation	0.0705793	ENSG00000115594,ENSG00000151422,ENSG00000159842,ENSG00000160255,ENSG00000186716	IL1R1,FER,ABR,ITGB2,BCR
GO:0044090	0.00445198	10.8351	0.345969	3	14	positive regulation of vacuole organization	0.0708033	ENSG00000115839,ENSG00000150867,ENSG00000159082	RAB3GAP1,PIP4K2A,SYNJ1
GO:0008015	0.00463186	1.92894	11.9607	22	484	blood circulation	0.0732265	ENSG00000046604,ENSG00000071242,ENSG00000072062,ENSG00000111199,ENSG00000113441,ENSG00000121879,ENSG00000125124,ENSG00000132326,ENSG00000140463,ENSG00000151090,ENSG00000159023,ENSG00000159842,ENSG00000164308,ENSG00000165895,ENSG00000168710,ENSG00000169057,ENSG00000173482,ENSG00000186716,ENSG00000186951,ENSG00000198363,ENSG00000204634,ENSG00000274286	DSG2,RPS6KA2,PRKACA,TRPV4,LNPEP,PIK3CA,BBS2,PER2,BBS4,THRB,EPB41,ABR,ERAP2,ARHGAP42,AHCYL1,MECP2,PTPRM,BCR,PPARA,ASPH,TBC1D8,ADRA2B
GO:1901652	0.00465937	1.99735	10.5026	20	425	response to peptide	0.0732265	ENSG00000004799,ENSG00000005882,ENSG00000048052,ENSG00000072062,ENSG00000108946,ENSG00000111199,ENSG00000112851,ENSG00000114166,ENSG00000117461,ENSG00000121879,ENSG00000132356,ENSG00000142875,ENSG00000150907,ENSG00000151422,ENSG00000165699,ENSG00000166263,ENSG00000168710,ENSG00000185591,ENSG00000186951,ENSG00000204406	PDK4,PDK2,HDAC9,PRKACA,PRKAR1A,TRPV4,ERBB2IP,KAT2B,PIK3R3,PIK3CA,PRKAA1,PRKACB,FOXO1,FER,TSC1,STXBP4,AHCYL1,SP1,PPARA,MBD5
GO:0031175	0.0046989	1.71037	19.6461	32	795	neuron projection development	0.0732265	ENSG00000006468,ENSG00000008086,ENSG00000075223,ENSG00000104133,ENSG00000106078,ENSG00000107263,ENSG00000107731,ENSG00000111199,ENSG00000124333,ENSG00000127603,ENSG00000130779,ENSG00000133961,ENSG00000134313,ENSG00000136854,ENSG00000138696,ENSG00000140463,ENSG00000141298,ENSG00000141503,ENSG00000141736,ENSG00000145868,ENSG00000158092,ENSG00000158290,ENSG00000163110,ENSG00000169057,ENSG00000173376…	ETV1,CDKL5,SEMA3C,SPG11,COBL,RAPGEF1,UNC5B,TRPV4,VAMP7,MACF1,CLIP1,NUMB,KIDINS220,STXBP1,BMPR1B,BBS4,SSH2,MINK1,ERBB2,FBXO38,NCK1,CUL4B,PDLIM5,MECP2,NDNF,PTPRM,SPTBN2,NR2F1,ITSN2,ATL1,FMN1,CYFIP1
GO:0006896	0.00470415	6.63235	0.691939	4	28	Golgi to vacuole transport	0.0732265	ENSG00000085832,ENSG00000107862,ENSG00000119396,ENSG00000166747	EPS15,GBF1,RAB14,AP1G1
GO:0010659	0.00470415	6.63235	0.691939	4	28	cardiac muscle cell apoptotic process	0.0732265	ENSG00000071242,ENSG00000089163,ENSG00000120868,ENSG00000197442	RPS6KA2,SIRT4,APAF1,MAP3K5
GO:0046320	0.00470415	6.63235	0.691939	4	28	regulation of fatty acid oxidation	0.0732265	ENSG00000004799,ENSG00000089163,ENSG00000102910,ENSG00000186951	PDK4,SIRT4,LONP2,PPARA
GO:0022603	0.0047151	1.64516	23.6495	37	957	regulation of anatomical structure morphogenesis	0.0732265	ENSG00000008086,ENSG00000048052,ENSG00000075223,ENSG00000075711,ENSG00000100592,ENSG00000111424,ENSG00000113916,ENSG00000116574,ENSG00000124333,ENSG00000127603,ENSG00000133961,ENSG00000139132,ENSG00000140463,ENSG00000141298,ENSG00000141736,ENSG00000144791,ENSG00000145715,ENSG00000150760,ENSG00000151491,ENSG00000159842,ENSG00000160255,ENSG00000162434,ENSG00000163110,ENSG00000163637,ENSG00000164056…	CDKL5,HDAC9,SEMA3C,DLG1,DAAM1,VDR,BCL6,RHOU,VAMP7,MACF1,NUMB,FGD4,BBS4,SSH2,ERBB2,LIMD1,RASA1,DOCK1,EPS8,ABR,ITGB2,JAK1,PDLIM5,PRICKLE2,SPRY1,CITED2,BRWD3,HIF1AN,AKAP13,PTPRM,MED12,SEPT9,BCL9L,BCR,ITSN2,LGR4,CYFIP1
GO:0016579	0.00476209	3.00372	3.18786	9	129	protein deubiquitination	0.0737089	ENSG00000114316,ENSG00000135093,ENSG00000140153,ENSG00000143409,ENSG00000155313,ENSG00000158019,ENSG00000170185,ENSG00000175073,ENSG00000264522	USP4,USP30,WDR20,FAM63A,USP25,BRE,USP38,VCPIP1,OTUD7B
GO:0010941	0.00482221	1.52128	36.1291	52	1462	regulation of cell death	0.0743906	ENSG00000004799,ENSG00000006747,ENSG00000071242,ENSG00000089163,ENSG00000100485,ENSG00000102580,ENSG00000103429,ENSG00000106052,ENSG00000107731,ENSG00000110330,ENSG00000111424,ENSG00000111707,ENSG00000113916,ENSG00000116133,ENSG00000118454,ENSG00000119541,ENSG00000120868,ENSG00000121879,ENSG00000126217,ENSG00000131089,ENSG00000131653,ENSG00000132356,ENSG00000135472,ENSG00000136158,ENSG00000136854…	PDK4,SCIN,RPS6KA2,SIRT4,SOS2,DNAJC3,BFAR,TAX1BP1,UNC5B,BIRC2,VDR,SUDS3,BCL6,DHCR24,ANKRD13C,VPS4B,APAF1,PIK3CA,MCF2L,ARHGEF9,TRAF7,PRKAA1,FAIM2,SPRY2,STXBP1,ARRB1,BMPR1B,FGD4,RASA1,IGFBP3,HYOU1,FOXO1,DEPTOR,NCK1,ABR,CITED2,TSC1,MECP2,AKAP13,EIF2AK3,ZMAT3,NDNF,RPS6KA3,HCAR2,PPARA,DAPK1,ARHGEF12,KANK2,MAP3K5,UNC13B,TGM2,BAG6
GO:0002831	0.00500796	2.97871	3.21257	9	130	regulation of response to biotic stimulus	0.0768789	ENSG00000064201,ENSG00000088888,ENSG00000100280,ENSG00000110330,ENSG00000121236,ENSG00000129657,ENSG00000138032,ENSG00000166747,ENSG00000175115	TSPAN32,MAVS,AP1B1,BIRC2,TRIM6,SEC14L1,PPM1B,AP1G1,PACS1
GO:0043122	0.00503334	2.39758	5.70849	13	231	regulation of I-kappaB kinase/NF-kappaB signaling	0.0768789	ENSG00000080561,ENSG00000082196,ENSG00000088888,ENSG00000102471,ENSG00000110330,ENSG00000128284,ENSG00000129353,ENSG00000138032,ENSG00000139946,ENSG00000170776,ENSG00000171132,ENSG00000198959,ENSG00000264522	MID2,C1QTNF3,MAVS,NDFIP2,BIRC2,APOL3,SLC44A2,PPM1B,PELI2,AKAP13,PRKCE,TGM2,OTUD7B
GO:0051650	0.00503334	2.39758	5.70849	13	231	establishment of vesicle localization	0.0768789	ENSG00000073969,ENSG00000104133,ENSG00000106299,ENSG00000107862,ENSG00000113615,ENSG00000115839,ENSG00000124333,ENSG00000125124,ENSG00000136854,ENSG00000140463,ENSG00000159082,ENSG00000170348,ENSG00000198722	NSF,SPG11,WASL,GBF1,SEC24A,RAB3GAP1,VAMP7,BBS2,STXBP1,BBS4,SYNJ1,TMED10,UNC13B
GO:0060560	0.00508439	2.49746	5.06598	12	205	developmental growth involved in morphogenesis	0.0774032	ENSG00000008086,ENSG00000075223,ENSG00000104133,ENSG00000106078,ENSG00000117139,ENSG00000127603,ENSG00000136158,ENSG00000164056,ENSG00000184634,ENSG00000198399,ENSG00000248905,ENSG00000273749	CDKL5,SEMA3C,SPG11,COBL,KDM5B,MACF1,SPRY2,SPRY1,MED12,ITSN2,FMN1,CYFIP1
GO:0023056	0.00512896	1.51017	37.0929	53	1501	positive regulation of signaling	0.0778257	ENSG00000051382,ENSG00000073969,ENSG00000080561,ENSG00000082196,ENSG00000085832,ENSG00000088888,ENSG00000100485,ENSG00000102471,ENSG00000106069,ENSG00000107263,ENSG00000107731,ENSG00000110330,ENSG00000111199,ENSG00000111846,ENSG00000115594,ENSG00000115839,ENSG00000120868,ENSG00000121236,ENSG00000124333,ENSG00000127603,ENSG00000128284,ENSG00000129353,ENSG00000131653,ENSG00000132356,ENSG00000134313…	PIK3CB,NSF,MID2,C1QTNF3,EPS15,MAVS,SOS2,NDFIP2,CHN2,RAPGEF1,UNC5B,BIRC2,TRPV4,GCNT2,IL1R1,RAB3GAP1,APAF1,TRIM6,VAMP7,MACF1,APOL3,SLC44A2,TRAF7,PRKAA1,KIDINS220,TAOK3,SPRY2,ARRB1,IFT172,PLCE1,BMPR1B,PELI2,MINK1,ERBB2,IGFBP3,EPS8,DISP1,TAB3,NCK1,ALOX15,CITED2,MECP2,AKAP13,PRKCE,HCAR2,MAP3K5,ITSN2,UNC13B,RASGEF1A,TGM2,MBD5,LGR4,ADRA2B
GO:0002221	0.00521969	2.76463	3.83037	10	155	pattern recognition receptor signaling pathway	0.0784309	ENSG00000088888,ENSG00000110330,ENSG00000112851,ENSG00000129657,ENSG00000157625,ENSG00000160255,ENSG00000170458,ENSG00000171132,ENSG00000177189,ENSG00000205213	MAVS,BIRC2,ERBB2IP,SEC14L1,TAB3,ITGB2,CD14,PRKCE,RPS6KA3,LGR4
GO:0017157	0.00521969	2.76463	3.83037	10	155	regulation of exocytosis	0.0784309	ENSG00000073969,ENSG00000115839,ENSG00000119541,ENSG00000124333,ENSG00000136854,ENSG00000151422,ENSG00000159842,ENSG00000166747,ENSG00000186716,ENSG00000198722	NSF,RAB3GAP1,VPS4B,VAMP7,STXBP1,FER,ABR,AP1G1,BCR,UNC13B
GO:0021915	0.00521969	2.76463	3.83037	10	155	neural tube development	0.0784309	ENSG00000072062,ENSG00000075223,ENSG00000106078,ENSG00000120868,ENSG00000138002,ENSG00000140463,ENSG00000142875,ENSG00000149418,ENSG00000165699,ENSG00000184634	PRKACA,SEMA3C,COBL,APAF1,IFT172,BBS4,PRKACB,ST14,TSC1,MED12
GO:0016482	0.00526356	2.95411	3.23728	9	131	cytosolic transport	0.0788342	ENSG00000085832,ENSG00000107185,ENSG00000107862,ENSG00000115561,ENSG00000119396,ENSG00000141252,ENSG00000151502,ENSG00000160695,ENSG00000166747	EPS15,RGP1,GBF1,CHMP3,RAB14,VPS53,VPS26B,VPS11,AP1G1
GO:0032269	0.00529409	1.63199	23.8225	37	964	negative regulation of cellular protein metabolic process	0.0789565	ENSG00000075711,ENSG00000077232,ENSG00000078687,ENSG00000084234,ENSG00000089163,ENSG00000092330,ENSG00000100665,ENSG00000102580,ENSG00000107185,ENSG00000107263,ENSG00000108946,ENSG00000110330,ENSG00000114166,ENSG00000114316,ENSG00000116133,ENSG00000132326,ENSG00000135090,ENSG00000136158,ENSG00000136231,ENSG00000137486,ENSG00000144791,ENSG00000146674,ENSG00000150907,ENSG00000150938,ENSG00000153721…	DLG1,DNAJC10,TNRC6C,APLP2,SIRT4,TINF2,SERPINA4,DNAJC3,RGP1,RAPGEF1,PRKAR1A,BIRC2,KAT2B,USP4,DHCR24,PER2,TAOK3,SPRY2,IGF2BP3,ARRB1,LIMD1,IGFBP3,FOXO1,CRIM1,CNKSR3,DEPTOR,NCK1,SPRY1,TSC1,MECP2,MTM1,PRKCE,EIF2AK3,RPS6KA3,SMYD3,DAPK1,BAG6
GO:0040014	0.00530935	4.05803	1.60629	6	65	regulation of multicellular organism growth	0.0789565	ENSG00000108557,ENSG00000120756,ENSG00000121879,ENSG00000125124,ENSG00000140463,ENSG00000204406	RAI1,PLS1,PIK3CA,BBS2,BBS4,MBD5
GO:0009306	0.00533507	1.93558	11.3676	21	460	protein secretion	0.0789565	ENSG00000026950,ENSG00000082196,ENSG00000089163,ENSG00000111199,ENSG00000113615,ENSG00000121236,ENSG00000132326,ENSG00000137486,ENSG00000143457,ENSG00000155093,ENSG00000156675,ENSG00000164144,ENSG00000166263,ENSG00000170458,ENSG00000170745,ENSG00000171132,ENSG00000172071,ENSG00000182782,ENSG00000186470,ENSG00000198722,ENSG00000205213	BTN3A1,C1QTNF3,SIRT4,TRPV4,SEC24A,TRIM6,PER2,ARRB1,GOLPH3L,PTPRN2,RAB11FIP1,ARFIP1,STXBP4,CD14,KCNS3,PRKCE,EIF2AK3,HCAR2,BTN3A2,UNC13B,LGR4
GO:0002764	0.00533997	1.90348	12.1089	22	490	immune response-regulating signaling pathway	0.0789565	ENSG00000026950,ENSG00000051382,ENSG00000072062,ENSG00000088888,ENSG00000106299,ENSG00000110330,ENSG00000112851,ENSG00000121879,ENSG00000129657,ENSG00000142875,ENSG00000150760,ENSG00000151422,ENSG00000157625,ENSG00000158092,ENSG00000158195,ENSG00000160255,ENSG00000162896,ENSG00000170458,ENSG00000171132,ENSG00000177189,ENSG00000205213,ENSG00000273749	BTN3A1,PIK3CB,PRKACA,MAVS,WASL,BIRC2,ERBB2IP,PIK3CA,SEC14L1,PRKACB,DOCK1,FER,TAB3,NCK1,WASF2,ITGB2,PIGR,CD14,PRKCE,RPS6KA3,LGR4,CYFIP1
GO:0035966	0.00544103	2.5963	4.47289	11	181	response to topologically incorrect protein	0.0790224	ENSG00000008952,ENSG00000025796,ENSG00000102580,ENSG00000103429,ENSG00000116406,ENSG00000149428,ENSG00000158092,ENSG00000172071,ENSG00000182158,ENSG00000182934,ENSG00000198380	SEC62,SEC63,DNAJC3,BFAR,EDEM3,HYOU1,NCK1,EIF2AK3,CREB3L2,SRPR,GFPT1
GO:0034315	0.00546395	9.93154	0.370681	3	15	regulation of Arp2/3 complex-mediated actin nucleation	0.0790224	ENSG00000106299,ENSG00000164144,ENSG00000273749	WASL,ARFIP1,CYFIP1
GO:0035493	0.00546395	9.93154	0.370681	3	15	SNARE complex assembly	0.0790224	ENSG00000124333,ENSG00000136854,ENSG00000160695	VAMP7,STXBP1,VPS11
GO:0039529	0.00546395	9.93154	0.370681	3	15	RIG-I signaling pathway	0.0790224	ENSG00000088888,ENSG00000110330,ENSG00000129657	MAVS,BIRC2,SEC14L1
GO:0045943	0.00546395	9.93154	0.370681	3	15	positive regulation of transcription from RNA polymerase I promoter	0.0790224	ENSG00000141736,ENSG00000172071,ENSG00000172943	ERBB2,EIF2AK3,PHF8
GO:0051457	0.00546395	9.93154	0.370681	3	15	maintenance of protein location in nucleus	0.0790224	ENSG00000100242,ENSG00000140463,ENSG00000159256	SUN2,BBS4,MORC3
GO:0070166	0.00546395	9.93154	0.370681	3	15	enamel mineralization	0.0790224	ENSG00000150907,ENSG00000166415,ENSG00000186951	FOXO1,WDR72,PPARA
GO:0012501	0.00551954	1.46531	44.1111	61	1785	programmed cell death	0.0795777	ENSG00000004799,ENSG00000005882,ENSG00000006747,ENSG00000052795,ENSG00000071242,ENSG00000077232,ENSG00000089163,ENSG00000100485,ENSG00000102580,ENSG00000103429,ENSG00000106052,ENSG00000107731,ENSG00000110330,ENSG00000111424,ENSG00000111707,ENSG00000113916,ENSG00000115561,ENSG00000116133,ENSG00000118454,ENSG00000120868,ENSG00000121879,ENSG00000126217,ENSG00000127334,ENSG00000131089,ENSG00000131653…	PDK4,PDK2,SCIN,FNIP2,RPS6KA2,DNAJC10,SIRT4,SOS2,DNAJC3,BFAR,TAX1BP1,UNC5B,BIRC2,VDR,SUDS3,BCL6,CHMP3,DHCR24,ANKRD13C,APAF1,PIK3CA,MCF2L,DYRK2,ARHGEF9,TRAF7,PRKAA1,FAIM2,SPRY2,STXBP1,ARRB1,SHF,BMPR1B,FGD4,GULP1,RASA1,IGFBP3,HYOU1,DOCK1,FOXO1,DEPTOR,BRE,NCK1,ABR,ITGB2,CITED2,MECP2,CD14,AKAP13,PRKCE,EIF2AK3,ZMAT3,NDNF,RPS6KA3,HCAR2,DAPK1,ARHGEF12,KANK2,MAP3K5,UNC13B,TGM2,BAG6
GO:0043067	0.00557486	1.52654	33.8556	49	1370	regulation of programmed cell death	0.0801256	ENSG00000004799,ENSG00000006747,ENSG00000071242,ENSG00000089163,ENSG00000100485,ENSG00000102580,ENSG00000103429,ENSG00000106052,ENSG00000107731,ENSG00000110330,ENSG00000111424,ENSG00000111707,ENSG00000113916,ENSG00000116133,ENSG00000118454,ENSG00000120868,ENSG00000121879,ENSG00000126217,ENSG00000131089,ENSG00000131653,ENSG00000132356,ENSG00000135472,ENSG00000136158,ENSG00000136854,ENSG00000137486…	PDK4,SCIN,RPS6KA2,SIRT4,SOS2,DNAJC3,BFAR,TAX1BP1,UNC5B,BIRC2,VDR,SUDS3,BCL6,DHCR24,ANKRD13C,APAF1,PIK3CA,MCF2L,ARHGEF9,TRAF7,PRKAA1,FAIM2,SPRY2,STXBP1,ARRB1,BMPR1B,FGD4,RASA1,IGFBP3,HYOU1,FOXO1,DEPTOR,NCK1,ABR,CITED2,MECP2,AKAP13,EIF2AK3,ZMAT3,NDNF,RPS6KA3,HCAR2,DAPK1,ARHGEF12,KANK2,MAP3K5,UNC13B,TGM2,BAG6
GO:0016236	0.00559838	2.36459	5.78263	13	234	macroautophagy	0.0802146	ENSG00000100330,ENSG00000108239,ENSG00000115561,ENSG00000115839,ENSG00000132356,ENSG00000133056,ENSG00000150867,ENSG00000151502,ENSG00000165699,ENSG00000171100,ENSG00000171109,ENSG00000188554,ENSG00000196821	MTMR3,TBC1D12,CHMP3,RAB3GAP1,PRKAA1,PIK3C2B,PIP4K2A,VPS26B,TSC1,MTM1,MFN1,NBR1,C6orf106
GO:0045913	0.00572158	3.99015	1.631	6	66	positive regulation of carbohydrate metabolic process	0.0803417	ENSG00000114166,ENSG00000127334,ENSG00000132356,ENSG00000150907,ENSG00000171132,ENSG00000186951	KAT2B,DYRK2,PRKAA1,FOXO1,PRKCE,PPARA
GO:0010629	0.00576231	1.51133	35.6101	51	1441	negative regulation of gene expression	0.0803417	ENSG00000048052,ENSG00000052795,ENSG00000075711,ENSG00000076108,ENSG00000078687,ENSG00000080561,ENSG00000089163,ENSG00000102471,ENSG00000105855,ENSG00000110330,ENSG00000111199,ENSG00000111424,ENSG00000111707,ENSG00000111727,ENSG00000113916,ENSG00000117036,ENSG00000117139,ENSG00000117625,ENSG00000119669,ENSG00000121236,ENSG00000125124,ENSG00000130164,ENSG00000132326,ENSG00000132589,ENSG00000136169…	HDAC9,FNIP2,DLG1,BAZ2A,TNRC6C,MID2,SIRT4,NDFIP2,ITGB8,BIRC2,TRPV4,VDR,SUDS3,HCFC2,BCL6,ETV3,KDM5B,RCOR3,IRF2BPL,TRIM6,BBS2,LDLR,PER2,FLOT2,SETDB2,IGF2BP3,BBS4,LIMD1,FOXO1,THRB,JAZF1,NCK1,CITED2,ZHX1,TSC1,HIF1AN,IRF2,MECP2,ZNF217,EIF2AK3,PHF8,NR2F1,ZFP90,PPARA,MPHOSPH8,DAPK1,STRN3,KANK2,SREBF2,LGR4,OTUD7B
GO:0030258	0.00578174	2.27111	6.47457	14	262	lipid modification	0.0803417	ENSG00000004799,ENSG00000051382,ENSG00000089163,ENSG00000100330,ENSG00000102910,ENSG00000121879,ENSG00000132356,ENSG00000133056,ENSG00000141736,ENSG00000143393,ENSG00000150867,ENSG00000159082,ENSG00000171100,ENSG00000186951	PDK4,PIK3CB,SIRT4,MTMR3,LONP2,PIK3CA,PRKAA1,PIK3C2B,ERBB2,PI4KB,PIP4K2A,SYNJ1,MTM1,PPARA
GO:0000820	0.00579821	26.4341	0.12356	2	5	regulation of glutamine family amino acid metabolic process	0.0803417	ENSG00000089163,ENSG00000155465	SIRT4,SLC7A7
GO:0006620	0.00579821	26.4341	0.12356	2	5	posttranslational protein targeting to membrane	0.0803417	ENSG00000008952,ENSG00000025796	SEC62,SEC63
GO:0010807	0.00579821	26.4341	0.12356	2	5	regulation of synaptic vesicle priming	0.0803417	ENSG00000136854,ENSG00000198722	STXBP1,UNC13B
GO:0010835	0.00579821	26.4341	0.12356	2	5	regulation of protein ADP-ribosylation	0.0803417	ENSG00000092330,ENSG00000114166	TINF2,KAT2B
GO:0035624	0.00579821	26.4341	0.12356	2	5	receptor transactivation	0.0803417	ENSG00000124151,ENSG00000274286	NCOA3,ADRA2B
GO:0043313	0.00579821	26.4341	0.12356	2	5	regulation of neutrophil degranulation	0.0803417	ENSG00000159842,ENSG00000186716	ABR,BCR
GO:0071651	0.00579821	26.4341	0.12356	2	5	positive regulation of chemokine (C-C motif) ligand 5 production	0.0803417	ENSG00000088888,ENSG00000111199	MAVS,TRPV4
GO:1903912	0.00579821	26.4341	0.12356	2	5	negative regulation of endoplasmic reticulum stress-induced eIF2 alpha phosphorylation	0.0803417	ENSG00000102580,ENSG00000158092	DNAJC3,NCK1
GO:0045010	0.00588186	4.74377	1.16147	5	47	actin nucleation	0.0812574	ENSG00000006747,ENSG00000106299,ENSG00000164144,ENSG00000248905,ENSG00000273749	SCIN,WASL,ARFIP1,FMN1,CYFIP1
GO:0007033	0.00591278	2.44614	5.16483	12	209	vacuole organization	0.0814415	ENSG00000100330,ENSG00000108239,ENSG00000115145,ENSG00000115561,ENSG00000115839,ENSG00000119396,ENSG00000119541,ENSG00000133056,ENSG00000150867,ENSG00000159082,ENSG00000160695,ENSG00000171100	MTMR3,TBC1D12,STAM2,CHMP3,RAB3GAP1,RAB14,VPS4B,PIK3C2B,PIP4K2A,SYNJ1,VPS11,MTM1
GO:0010658	0.00605705	6.12142	0.741363	4	30	striated muscle cell apoptotic process	0.0824471	ENSG00000071242,ENSG00000089163,ENSG00000120868,ENSG00000197442	RPS6KA2,SIRT4,APAF1,MAP3K5
GO:0016601	0.00605705	6.12142	0.741363	4	30	Rac protein signal transduction	0.0824471	ENSG00000116574,ENSG00000151491,ENSG00000158195,ENSG00000273749	RHOU,EPS8,WASF2,CYFIP1
GO:0038179	0.00605705	6.12142	0.741363	4	30	neurotrophin signaling pathway	0.0824471	ENSG00000107263,ENSG00000134313,ENSG00000136158,ENSG00000164056	RAPGEF1,KIDINS220,SPRY2,SPRY1
GO:0072595	0.00605705	6.12142	0.741363	4	30	maintenance of protein localization in organelle	0.0824471	ENSG00000100242,ENSG00000118454,ENSG00000140463,ENSG00000159256	SUN2,ANKRD13C,BBS4,MORC3
GO:0023061	0.00607855	1.98294	10.0331	19	406	signal release	0.0824972	ENSG00000082196,ENSG00000089163,ENSG00000111199,ENSG00000115839,ENSG00000124333,ENSG00000132326,ENSG00000136854,ENSG00000137486,ENSG00000155093,ENSG00000156675,ENSG00000159082,ENSG00000166263,ENSG00000170745,ENSG00000171132,ENSG00000172071,ENSG00000182782,ENSG00000185666,ENSG00000198722,ENSG00000274286	C1QTNF3,SIRT4,TRPV4,RAB3GAP1,VAMP7,PER2,STXBP1,ARRB1,PTPRN2,RAB11FIP1,SYNJ1,STXBP4,KCNS3,PRKCE,EIF2AK3,HCAR2,SYN3,UNC13B,ADRA2B
GO:0051656	0.00623537	1.9777	10.0578	19	407	establishment of organelle localization	0.0843781	ENSG00000073969,ENSG00000075711,ENSG00000100242,ENSG00000104133,ENSG00000106299,ENSG00000107862,ENSG00000113615,ENSG00000115839,ENSG00000119541,ENSG00000124333,ENSG00000125124,ENSG00000136158,ENSG00000136854,ENSG00000140463,ENSG00000151422,ENSG00000159082,ENSG00000164056,ENSG00000170348,ENSG00000198722	NSF,DLG1,SUN2,SPG11,WASL,GBF1,SEC24A,RAB3GAP1,VPS4B,VAMP7,BBS2,SPRY2,STXBP1,BBS4,FER,SYNJ1,SPRY1,TMED10,UNC13B
GO:0031344	0.00635272	1.84461	13.048	23	528	regulation of cell projection organization	0.0857154	ENSG00000008086,ENSG00000075223,ENSG00000106078,ENSG00000106299,ENSG00000107263,ENSG00000111199,ENSG00000120756,ENSG00000124333,ENSG00000127603,ENSG00000130779,ENSG00000134313,ENSG00000136158,ENSG00000140463,ENSG00000141298,ENSG00000145868,ENSG00000151422,ENSG00000158092,ENSG00000158195,ENSG00000163110,ENSG00000173376,ENSG00000175745,ENSG00000184640,ENSG00000198399	CDKL5,SEMA3C,COBL,WASL,RAPGEF1,TRPV4,PLS1,VAMP7,MACF1,CLIP1,KIDINS220,SPRY2,BBS4,SSH2,FBXO38,FER,NCK1,WASF2,PDLIM5,NDNF,NR2F1,SEPT9,ITSN2
GO:0090002	0.00638846	2.85962	3.33613	9	135	establishment of protein localization to plasma membrane	0.085947	ENSG00000073969,ENSG00000075711,ENSG00000120756,ENSG00000124333,ENSG00000125124,ENSG00000127603,ENSG00000130779,ENSG00000132589,ENSG00000175115	NSF,DLG1,PLS1,VAMP7,BBS2,MACF1,CLIP1,FLOT2,PACS1
GO:0044320	0.00660294	9.16701	0.395393	3	16	cellular response to leptin stimulus	0.0885751	ENSG00000116678,ENSG00000125124,ENSG00000140463	LEPR,BBS2,BBS4
GO:0043001	0.00682115	5.89434	0.766075	4	31	Golgi to plasma membrane protein transport	0.0912378	ENSG00000073969,ENSG00000124333,ENSG00000125124,ENSG00000127603	NSF,VAMP7,BBS2,MACF1
GO:0051261	0.00688553	3.3687	2.22409	7	90	protein depolymerization	0.091812	ENSG00000006747,ENSG00000111199,ENSG00000119541,ENSG00000138594,ENSG00000151491,ENSG00000159082,ENSG00000173898	SCIN,TRPV4,VPS4B,TMOD3,EPS8,SYNJ1,SPTBN2
GO:0043410	0.00692359	1.88696	11.6394	21	471	positive regulation of MAPK cascade	0.091812	ENSG00000051382,ENSG00000107263,ENSG00000111199,ENSG00000111846,ENSG00000131653,ENSG00000132356,ENSG00000134313,ENSG00000135090,ENSG00000136158,ENSG00000137486,ENSG00000138193,ENSG00000139946,ENSG00000141503,ENSG00000141736,ENSG00000146674,ENSG00000157625,ENSG00000161905,ENSG00000170776,ENSG00000171132,ENSG00000197442,ENSG00000274286	PIK3CB,RAPGEF1,TRPV4,GCNT2,TRAF7,PRKAA1,KIDINS220,TAOK3,SPRY2,ARRB1,PLCE1,PELI2,MINK1,ERBB2,IGFBP3,TAB3,ALOX15,AKAP13,PRKCE,MAP3K5,ADRA2B
GO:0051640	0.00692359	1.88696	11.6394	21	471	organelle localization	0.091812	ENSG00000073969,ENSG00000075711,ENSG00000100242,ENSG00000104133,ENSG00000106299,ENSG00000107862,ENSG00000113615,ENSG00000115839,ENSG00000119541,ENSG00000124333,ENSG00000125124,ENSG00000136158,ENSG00000136854,ENSG00000140463,ENSG00000151422,ENSG00000159082,ENSG00000164056,ENSG00000167306,ENSG00000170348,ENSG00000171100,ENSG00000198722	NSF,DLG1,SUN2,SPG11,WASL,GBF1,SEC24A,RAB3GAP1,VPS4B,VAMP7,BBS2,SPRY2,STXBP1,BBS4,FER,SYNJ1,SPRY1,MYO5B,TMED10,MTM1,UNC13B
GO:0031346	0.00702825	2.14854	7.31478	15	296	positive regulation of cell projection organization	0.0929336	ENSG00000008086,ENSG00000106078,ENSG00000106299,ENSG00000107263,ENSG00000124333,ENSG00000127603,ENSG00000130779,ENSG00000134313,ENSG00000140463,ENSG00000145868,ENSG00000158092,ENSG00000158195,ENSG00000173376,ENSG00000184640,ENSG00000198399	CDKL5,COBL,WASL,RAPGEF1,VAMP7,MACF1,CLIP1,KIDINS220,BBS4,FBXO38,NCK1,WASF2,NDNF,SEPT9,ITSN2
GO:0010638	0.00718462	1.85051	12.4302	22	503	positive regulation of organelle organization	0.0947305	ENSG00000006747,ENSG00000075711,ENSG00000092330,ENSG00000106299,ENSG00000111199,ENSG00000115839,ENSG00000116574,ENSG00000119541,ENSG00000130779,ENSG00000140463,ENSG00000150867,ENSG00000151422,ENSG00000158092,ENSG00000159082,ENSG00000160695,ENSG00000161905,ENSG00000164144,ENSG00000171132,ENSG00000184640,ENSG00000198911,ENSG00000248905,ENSG00000273749	SCIN,DLG1,TINF2,WASL,TRPV4,RAB3GAP1,RHOU,VPS4B,CLIP1,BBS4,PIP4K2A,FER,NCK1,SYNJ1,VPS11,ALOX15,ARFIP1,PRKCE,SEPT9,SREBF2,FMN1,CYFIP1
GO:0001952	0.00730538	3.3284	2.2488	7	91	regulation of cell-matrix adhesion	0.0960491	ENSG00000051382,ENSG00000113916,ENSG00000127603,ENSG00000141503,ENSG00000145715,ENSG00000165699,ENSG00000248905	PIK3CB,BCL6,MACF1,MINK1,RASA1,TSC1,FMN1
GO:0048871	0.00735934	2.07885	8.05614	16	326	multicellular organismal homeostasis	0.0964845	ENSG00000004799,ENSG00000072062,ENSG00000107798,ENSG00000108946,ENSG00000111199,ENSG00000111846,ENSG00000116678,ENSG00000121879,ENSG00000125124,ENSG00000132356,ENSG00000140463,ENSG00000142875,ENSG00000150907,ENSG00000154639,ENSG00000162896,ENSG00000167306	PDK4,PRKACA,LIPA,PRKAR1A,TRPV4,GCNT2,LEPR,PIK3CA,BBS2,PRKAA1,BBS4,PRKACB,FOXO1,CXADR,PIGR,MYO5B
GO:0042981	0.00751808	1.50491	33.559	48	1358	regulation of apoptotic process	0.0981568	ENSG00000004799,ENSG00000006747,ENSG00000071242,ENSG00000089163,ENSG00000100485,ENSG00000102580,ENSG00000103429,ENSG00000106052,ENSG00000107731,ENSG00000110330,ENSG00000111424,ENSG00000111707,ENSG00000113916,ENSG00000116133,ENSG00000118454,ENSG00000120868,ENSG00000121879,ENSG00000126217,ENSG00000131089,ENSG00000131653,ENSG00000132356,ENSG00000135472,ENSG00000136158,ENSG00000136854,ENSG00000137486…	PDK4,SCIN,RPS6KA2,SIRT4,SOS2,DNAJC3,BFAR,TAX1BP1,UNC5B,BIRC2,VDR,SUDS3,BCL6,DHCR24,ANKRD13C,APAF1,PIK3CA,MCF2L,ARHGEF9,TRAF7,PRKAA1,FAIM2,SPRY2,STXBP1,ARRB1,BMPR1B,FGD4,RASA1,IGFBP3,HYOU1,FOXO1,DEPTOR,NCK1,ABR,CITED2,MECP2,AKAP13,EIF2AK3,ZMAT3,NDNF,RPS6KA3,HCAR2,DAPK1,ARHGEF12,MAP3K5,UNC13B,TGM2,BAG6
GO:0002376	0.00752931	1.39258	58.024	76	2348	immune system process	0.0981568	ENSG00000006747,ENSG00000026950,ENSG00000048052,ENSG00000051382,ENSG00000064201,ENSG00000072062,ENSG00000075223,ENSG00000075711,ENSG00000077380,ENSG00000080561,ENSG00000088888,ENSG00000100280,ENSG00000102580,ENSG00000105738,ENSG00000106299,ENSG00000107862,ENSG00000108946,ENSG00000110330,ENSG00000111199,ENSG00000112851,ENSG00000113141,ENSG00000113163,ENSG00000113441,ENSG00000113615,ENSG00000113916…	SCIN,BTN3A1,HDAC9,PIK3CB,TSPAN32,PRKACA,SEMA3C,DLG1,DYNC1I2,MID2,MAVS,AP1B1,DNAJC3,SIPA1L3,WASL,GBF1,PRKAR1A,BIRC2,TRPV4,ERBB2IP,IK,COL4A3BP,LNPEP,SEC24A,BCL6,IL1R1,LEPR,MUC5B,CSF3R,TRIM6,PIK3CA,VAMP7,SEC14L1,FLOT2,PPM1B,TMOD3,ERBB2,PRKACB,DOCK1,PIP4K2A,FER,EPS8,CXADR,SLC7A7,TAB3,NCK1,WASF2,ABR,ITGB2,MCM3AP,ALOX15,JAK1,PIGR,RBM47,ERAP2,PAPD4,CITED2,TSC1,AP1G1,IRF2,CD14,PRKCE,CHD2,SPTBN2,PACS1,RPS…
GO:0051648	0.00760332	2.27079	6.00504	13	243	vesicle localization	0.0988432	ENSG00000073969,ENSG00000104133,ENSG00000106299,ENSG00000107862,ENSG00000113615,ENSG00000115839,ENSG00000124333,ENSG00000125124,ENSG00000136854,ENSG00000140463,ENSG00000159082,ENSG00000170348,ENSG00000198722	NSF,SPG11,WASL,GBF1,SEC24A,RAB3GAP1,VAMP7,BBS2,STXBP1,BBS4,SYNJ1,TMED10,UNC13B
GO:0050892	0.00764637	5.68347	0.790787	4	32	intestinal absorption	0.0990612	ENSG00000111424,ENSG00000119139,ENSG00000120756,ENSG00000130164	VDR,TJP2,PLS1,LDLR
GO:0006486	0.00770113	2.19035	6.69698	14	271	protein glycosylation	0.0990612	ENSG00000089163,ENSG00000092330,ENSG00000102158,ENSG00000102699,ENSG00000104723,ENSG00000111846,ENSG00000114166,ENSG00000115339,ENSG00000116406,ENSG00000117983,ENSG00000128268,ENSG00000136542,ENSG00000158470,ENSG00000257594	SIRT4,TINF2,MAGT1,PARP4,TUSC3,GCNT2,KAT2B,GALNT3,EDEM3,MUC5B,MGAT3,GALNT5,B4GALT5,GALNT4
GO:0043413	0.00770113	2.19035	6.69698	14	271	macromolecule glycosylation	0.0990612	ENSG00000089163,ENSG00000092330,ENSG00000102158,ENSG00000102699,ENSG00000104723,ENSG00000111846,ENSG00000114166,ENSG00000115339,ENSG00000116406,ENSG00000117983,ENSG00000128268,ENSG00000136542,ENSG00000158470,ENSG00000257594	SIRT4,TINF2,MAGT1,PARP4,TUSC3,GCNT2,KAT2B,GALNT3,EDEM3,MUC5B,MGAT3,GALNT5,B4GALT5,GALNT4
GO:0008286	0.00772838	2.98936	2.84189	8	115	insulin receptor signaling pathway	0.0990612	ENSG00000004799,ENSG00000005882,ENSG00000117461,ENSG00000121879,ENSG00000150907,ENSG00000151422,ENSG00000165699,ENSG00000166263	PDK4,PDK2,PIK3R3,PIK3CA,FOXO1,FER,TSC1,STXBP4
GO:0006644	0.00773186	1.97291	9.53887	18	386	phospholipid metabolic process	0.0990612	ENSG00000051382,ENSG00000067064,ENSG00000100330,ENSG00000100439,ENSG00000108389,ENSG00000109452,ENSG00000117461,ENSG00000121879,ENSG00000133056,ENSG00000135241,ENSG00000138193,ENSG00000141736,ENSG00000143393,ENSG00000150867,ENSG00000159082,ENSG00000161905,ENSG00000169057,ENSG00000171100	PIK3CB,IDI1,MTMR3,ABHD4,MTMR4,INPP4B,PIK3R3,PIK3CA,PIK3C2B,PNPLA8,PLCE1,ERBB2,PI4KB,PIP4K2A,SYNJ1,ALOX15,MECP2,MTM1
GO:0048284	0.00774852	2.46438	4.6953	11	190	organelle fusion	0.0990612	ENSG00000108239,ENSG00000115561,ENSG00000124333,ENSG00000135093,ENSG00000136854,ENSG00000160695,ENSG00000167202,ENSG00000171109,ENSG00000175073,ENSG00000198863,ENSG00000204634	TBC1D12,CHMP3,VAMP7,USP30,STXBP1,VPS11,TBC1D2B,MFN1,VCPIP1,RUNDC1,TBC1D8
GO:0034199	0.00787267	8.5117	0.420106	3	17	activation of protein kinase A activity	0.0998212	ENSG00000072062,ENSG00000108946,ENSG00000142875	PRKACA,PRKAR1A,PRKACB
GO:0043558	0.00787267	8.5117	0.420106	3	17	regulation of translational initiation in response to stress	0.0998212	ENSG00000102580,ENSG00000158092,ENSG00000172071	DNAJC3,NCK1,EIF2AK3
GO:0071305	0.00787267	8.5117	0.420106	3	17	cellular response to vitamin D	0.0998212	ENSG00000019186,ENSG00000111424,ENSG00000197256	CYP24A1,VDR,KANK2
GO:0007163	0.00800875	2.58466	4.0775	10	165	establishment or maintenance of cell polarity	0.101168	ENSG00000075711,ENSG00000105738,ENSG00000107862,ENSG00000112851,ENSG00000114541,ENSG00000132589,ENSG00000136158,ENSG00000151474,ENSG00000164056,ENSG00000198752	DLG1,SIPA1L3,GBF1,ERBB2IP,FRMD4B,FLOT2,SPRY2,FRMD4A,SPRY1,CDC42BPB
GO:0035295	0.00804338	1.78022	14.0859	24	570	tube development	0.101168	ENSG00000072062,ENSG00000075223,ENSG00000075711,ENSG00000106078,ENSG00000107798,ENSG00000111424,ENSG00000117139,ENSG00000120868,ENSG00000133961,ENSG00000136158,ENSG00000136169,ENSG00000138002,ENSG00000140463,ENSG00000142875,ENSG00000149418,ENSG00000151090,ENSG00000164056,ENSG00000164442,ENSG00000165699,ENSG00000184634,ENSG00000198959,ENSG00000204463,ENSG00000205213,ENSG00000248905	PRKACA,SEMA3C,DLG1,COBL,LIPA,VDR,KDM5B,APAF1,NUMB,SPRY2,SETDB2,IFT172,BBS4,PRKACB,ST14,THRB,SPRY1,CITED2,TSC1,MED12,TGM2,BAG6,LGR4,FMN1
GO:0008360	0.0080445	2.74963	3.45969	9	140	regulation of cell shape	0.101168	ENSG00000075711,ENSG00000116574,ENSG00000139132,ENSG00000144791,ENSG00000145715,ENSG00000151491,ENSG00000160255,ENSG00000165288,ENSG00000273749	DLG1,RHOU,FGD4,LIMD1,RASA1,EPS8,ITGB2,BRWD3,CYFIP1
GO:0031589	0.00814083	2.11032	7.43834	15	301	cell-substrate adhesion	0.102102	ENSG00000051382,ENSG00000111846,ENSG00000113916,ENSG00000127603,ENSG00000140092,ENSG00000141503,ENSG00000145715,ENSG00000150760,ENSG00000151422,ENSG00000160255,ENSG00000161905,ENSG00000165699,ENSG00000171132,ENSG00000173376,ENSG00000248905	PIK3CB,GCNT2,BCL6,MACF1,FBLN5,MINK1,RASA1,DOCK1,FER,ITGB2,ALOX15,TSC1,PRKCE,NDNF,FMN1
GO:0040007	0.00829996	1.60138	22.8834	35	926	growth	0.102356	ENSG00000008086,ENSG00000075223,ENSG00000104133,ENSG00000106078,ENSG00000108175,ENSG00000108557,ENSG00000108946,ENSG00000112851,ENSG00000113916,ENSG00000116678,ENSG00000117139,ENSG00000120756,ENSG00000121879,ENSG00000125124,ENSG00000127603,ENSG00000136158,ENSG00000138193,ENSG00000138696,ENSG00000140092,ENSG00000140463,ENSG00000141736,ENSG00000146674,ENSG00000150938,ENSG00000163110,ENSG00000164056…	CDKL5,SEMA3C,SPG11,COBL,ZMIZ1,RAI1,PRKAR1A,ERBB2IP,BCL6,LEPR,KDM5B,PLS1,PIK3CA,BBS2,MACF1,SPRY2,PLCE1,BMPR1B,FBLN5,BBS4,ERBB2,IGFBP3,CRIM1,PDLIM5,SPRY1,MTM1,ZMAT3,NDNF,SPTBN2,RPS6KA3,MED12,ITSN2,MBD5,FMN1,CYFIP1
GO:0010657	0.00831434	4.3302	1.26032	5	51	muscle cell apoptotic process	0.102356	ENSG00000071242,ENSG00000089163,ENSG00000120868,ENSG00000137486,ENSG00000197442	RPS6KA2,SIRT4,APAF1,ARRB1,MAP3K5
GO:0006887	0.00834004	1.95659	9.613	18	389	exocytosis	0.102356	ENSG00000006747,ENSG00000073969,ENSG00000084234,ENSG00000100665,ENSG00000115839,ENSG00000119541,ENSG00000124333,ENSG00000136854,ENSG00000144036,ENSG00000151422,ENSG00000156675,ENSG00000159082,ENSG00000159842,ENSG00000160695,ENSG00000166747,ENSG00000170348,ENSG00000186716,ENSG00000198722	SCIN,NSF,APLP2,SERPINA4,RAB3GAP1,VPS4B,VAMP7,STXBP1,EXOC6B,FER,RAB11FIP1,SYNJ1,ABR,VPS11,AP1G1,TMED10,BCR,UNC13B
GO:0030030	0.00836193	1.52105	30.3712	44	1229	cell projection organization	0.102356	ENSG00000006468,ENSG00000008086,ENSG00000075223,ENSG00000100271,ENSG00000104133,ENSG00000106078,ENSG00000106299,ENSG00000107263,ENSG00000107731,ENSG00000111199,ENSG00000120756,ENSG00000124333,ENSG00000125124,ENSG00000127603,ENSG00000130779,ENSG00000133961,ENSG00000134313,ENSG00000136158,ENSG00000136854,ENSG00000138002,ENSG00000138696,ENSG00000139132,ENSG00000140463,ENSG00000141298,ENSG00000141503…	ETV1,CDKL5,SEMA3C,TTLL1,SPG11,COBL,WASL,RAPGEF1,UNC5B,TRPV4,PLS1,VAMP7,BBS2,MACF1,CLIP1,NUMB,KIDINS220,SPRY2,STXBP1,IFT172,BMPR1B,FGD4,BBS4,SSH2,MINK1,ERBB2,FBXO38,FER,NCK1,WASF2,CUL4B,PDLIM5,TSC1,MECP2,NDNF,PTPRM,SPTBN2,NR2F1,SEPT9,CD2AP,ITSN2,ATL1,FMN1,CYFIP1
GO:0045055	0.0084429	2.16467	6.77111	14	274	regulated exocytosis	0.102356	ENSG00000006747,ENSG00000084234,ENSG00000100665,ENSG00000115839,ENSG00000124333,ENSG00000136854,ENSG00000151422,ENSG00000156675,ENSG00000159082,ENSG00000159842,ENSG00000166747,ENSG00000170348,ENSG00000186716,ENSG00000198722	SCIN,APLP2,SERPINA4,RAB3GAP1,VAMP7,STXBP1,FER,RAB11FIP1,SYNJ1,ABR,AP1G1,TMED10,BCR,UNC13B
GO:0006468	0.00849357	1.43087	45.0254	61	1822	protein phosphorylation	0.102356	ENSG00000004799,ENSG00000005882,ENSG00000008086,ENSG00000051382,ENSG00000052795,ENSG00000058091,ENSG00000071242,ENSG00000072062,ENSG00000075711,ENSG00000077232,ENSG00000088888,ENSG00000102580,ENSG00000107263,ENSG00000108946,ENSG00000111199,ENSG00000111846,ENSG00000113163,ENSG00000114166,ENSG00000115380,ENSG00000121236,ENSG00000121879,ENSG00000127334,ENSG00000131653,ENSG00000132356,ENSG00000134313…	PDK4,PDK2,CDKL5,PIK3CB,FNIP2,CDK14,RPS6KA2,PRKACA,DLG1,DNAJC10,MAVS,DNAJC3,RAPGEF1,PRKAR1A,TRPV4,GCNT2,COL4A3BP,KAT2B,EFEMP1,TRIM6,PIK3CA,DYRK2,TRAF7,PRKAA1,KIDINS220,TAOK3,SPRY2,ARRB1,PLCE1,BMPR1B,PELI2,MINK1,ERBB2,PRKACB,RASA1,IGFBP3,FOXO1,FER,CNKSR3,DEPTOR,TAB3,NCK1,MORC3,ITGB2,ALOX15,JAK1,SPRY1,TSC1,AKAP13,PRKCE,EIF2AK3,SPTBN2,RPS6KA3,SMYD3,BCR,NBR1,DAPK1,MAP3K5,CDC42BPB,RASGEF1A,ADRA2B
GO:0030865	0.00853463	5.48715	0.815499	4	33	cortical cytoskeleton organization	0.102356	ENSG00000075711,ENSG00000111199,ENSG00000120756,ENSG00000159023	DLG1,TRPV4,PLS1,EPB41
GO:0042982	0.00853463	5.48715	0.815499	4	33	amyloid precursor protein metabolic process	0.102356	ENSG00000075711,ENSG00000116133,ENSG00000132589,ENSG00000170348	DLG1,DHCR24,FLOT2,TMED10
GO:0032056	0.00855558	19.8244	0.148273	2	6	positive regulation of translation in response to stress	0.102356	ENSG00000102580,ENSG00000158092	DNAJC3,NCK1
GO:0051182	0.00855558	19.8244	0.148273	2	6	coenzyme transport	0.102356	ENSG00000169359,ENSG00000181035	SLC33A1,SLC25A42
GO:0060295	0.00855558	19.8244	0.148273	2	6	regulation of cilium movement involved in cell motility	0.102356	ENSG00000125124,ENSG00000140463	BBS2,BBS4
GO:0060296	0.00855558	19.8244	0.148273	2	6	regulation of cilium beat frequency involved in ciliary motility	0.102356	ENSG00000125124,ENSG00000140463	BBS2,BBS4
GO:0071638	0.00855558	19.8244	0.148273	2	6	negative regulation of monocyte chemotactic protein-1 production	0.102356	ENSG00000082196,ENSG00000112851	C1QTNF3,ERBB2IP
GO:0090557	0.00855558	19.8244	0.148273	2	6	establishment of endothelial intestinal barrier	0.102356	ENSG00000119139,ENSG00000130396	TJP2,MLLT4
GO:1901621	0.00855558	19.8244	0.148273	2	6	negative regulation of smoothened signaling pathway involved in dorsal/ventral neural tube patterning	0.102356	ENSG00000072062,ENSG00000142875	PRKACA,PRKACB
GO:1902019	0.00855558	19.8244	0.148273	2	6	regulation of cilium-dependent cell motility	0.102356	ENSG00000125124,ENSG00000140463	BBS2,BBS4
GO:1902563	0.00855558	19.8244	0.148273	2	6	regulation of neutrophil activation	0.102356	ENSG00000159842,ENSG00000186716	ABR,BCR
GO:0002009	0.00855919	1.81932	12.6279	22	511	morphogenesis of an epithelium	0.102356	ENSG00000072062,ENSG00000075223,ENSG00000075711,ENSG00000100592,ENSG00000106078,ENSG00000111424,ENSG00000117139,ENSG00000120868,ENSG00000133961,ENSG00000136158,ENSG00000136169,ENSG00000138002,ENSG00000140463,ENSG00000142875,ENSG00000149418,ENSG00000163637,ENSG00000164056,ENSG00000165699,ENSG00000184634,ENSG00000198959,ENSG00000205213,ENSG00000248905	PRKACA,SEMA3C,DLG1,DAAM1,COBL,VDR,KDM5B,APAF1,NUMB,SPRY2,SETDB2,IFT172,BBS4,PRKACB,ST14,PRICKLE2,SPRY1,TSC1,MED12,TGM2,LGR4,FMN1
GO:0048771	0.00879138	2.70794	3.50912	9	142	tissue remodeling	0.104862	ENSG00000004799,ENSG00000075223,ENSG00000107798,ENSG00000111424,ENSG00000116678,ENSG00000159842,ENSG00000186716,ENSG00000198959,ENSG00000205213	PDK4,SEMA3C,LIPA,VDR,LEPR,ABR,BCR,TGM2,LGR4
GO:0048856	0.00894558	1.28658	131.147	154	5307	anatomical structure development	0.106183	ENSG00000005108,ENSG00000006468,ENSG00000006747,ENSG00000007237,ENSG00000008086,ENSG00000025796,ENSG00000046604,ENSG00000048052,ENSG00000051382,ENSG00000071242,ENSG00000072062,ENSG00000075223,ENSG00000075711,ENSG00000100271,ENSG00000100280,ENSG00000100592,ENSG00000100852,ENSG00000101846,ENSG00000104133,ENSG00000105738,ENSG00000105855,ENSG00000106078,ENSG00000107263,ENSG00000107731,ENSG00000107798…	THSD7A,ETV1,SCIN,GAS7,CDKL5,SEC63,DSG2,HDAC9,PIK3CB,RPS6KA2,PRKACA,SEMA3C,DLG1,TTLL1,AP1B1,DAAM1,ARHGAP5,STS,SPG11,SIPA1L3,ITGB8,COBL,RAPGEF1,UNC5B,LIPA,LZTS2,ZMIZ1,RAI1,PRKAR1A,BIRC2,TRPV4,ARHGDIB,VDR,SUDS3,GCNT2,COL4A3BP,BCL6,SNX17,EFEMP1,RAB3GAP1,DHCR24,RHOU,LEPR,KDM5B,TJP2,RAB14,CSF3R,HOXB5,KIAA1217,APAF1,PIK3CA,NCOA3,VAMP7,BBS2,HIVEP3,MACF1,MLLT4,CLIP1,PER2,PRKAA1,FLOT2,NUMB,KIDINS220,FAIM2,…
GO:0010676	0.00901685	4.23781	1.28503	5	52	positive regulation of cellular carbohydrate metabolic process	0.106183	ENSG00000114166,ENSG00000127334,ENSG00000150907,ENSG00000171132,ENSG00000186951	KAT2B,DYRK2,FOXO1,PRKCE,PPARA
GO:0030837	0.00901685	4.23781	1.28503	5	52	negative regulation of actin filament polymerization	0.106183	ENSG00000006747,ENSG00000138594,ENSG00000140463,ENSG00000151491,ENSG00000173898	SCIN,TMOD3,BBS4,EPS8,SPTBN2
GO:0050994	0.00901685	4.23781	1.28503	5	52	regulation of lipid catabolic process	0.106183	ENSG00000102910,ENSG00000132356,ENSG00000171132,ENSG00000182782,ENSG00000186951	LONP2,PRKAA1,PRKCE,HCAR2,PPARA
GO:1902117	0.00901685	4.23781	1.28503	5	52	positive regulation of organelle assembly	0.106183	ENSG00000115839,ENSG00000119541,ENSG00000140463,ENSG00000150867,ENSG00000184640	RAB3GAP1,VPS4B,BBS4,PIP4K2A,SEPT9
GO:0032095	0.00927637	7.94377	0.444818	3	18	regulation of response to food	0.108686	ENSG00000125124,ENSG00000140463,ENSG00000186951	BBS2,BBS4,PPARA
GO:0051447	0.00927637	7.94377	0.444818	3	18	negative regulation of meiotic cell cycle	0.108686	ENSG00000071242,ENSG00000108946,ENSG00000142875	RPS6KA2,PRKAR1A,PRKACB
GO:0061025	0.00936538	2.29286	5.48608	12	222	membrane fusion	0.109452	ENSG00000073969,ENSG00000108239,ENSG00000115561,ENSG00000124333,ENSG00000135093,ENSG00000136854,ENSG00000160695,ENSG00000167202,ENSG00000171109,ENSG00000175073,ENSG00000198863,ENSG00000204634	NSF,TBC1D12,CHMP3,VAMP7,USP30,STXBP1,VPS11,TBC1D2B,MFN1,VCPIP1,RUNDC1,TBC1D8
GO:0071322	0.00941753	2.88092	2.94074	8	119	cellular response to carbohydrate stimulus	0.109784	ENSG00000071242,ENSG00000072062,ENSG00000121879,ENSG00000137486,ENSG00000155093,ENSG00000166263,ENSG00000171132,ENSG00000198722	RPS6KA2,PRKACA,PIK3CA,ARRB1,PTPRN2,STXBP4,PRKCE,UNC13B
GO:0003091	0.00948776	5.30392	0.840211	4	34	renal water homeostasis	0.110049	ENSG00000072062,ENSG00000108946,ENSG00000142875,ENSG00000167306	PRKACA,PRKAR1A,PRKACB,MYO5B
GO:0010907	0.00948776	5.30392	0.840211	4	34	positive regulation of glucose metabolic process	0.110049	ENSG00000114166,ENSG00000127334,ENSG00000150907,ENSG00000186951	KAT2B,DYRK2,FOXO1,PPARA
GO:0002753	0.00975927	4.14926	1.30974	5	53	cytoplasmic pattern recognition receptor signaling pathway	0.112915	ENSG00000088888,ENSG00000110330,ENSG00000112851,ENSG00000129657,ENSG00000157625	MAVS,BIRC2,ERBB2IP,SEC14L1,TAB3
GO:0031349	0.00990965	1.91951	9.78599	18	396	positive regulation of defense response	0.114369	ENSG00000072062,ENSG00000088888,ENSG00000110330,ENSG00000111199,ENSG00000112851,ENSG00000121236,ENSG00000124333,ENSG00000129657,ENSG00000130164,ENSG00000142875,ENSG00000157625,ENSG00000160255,ENSG00000166747,ENSG00000170458,ENSG00000171132,ENSG00000177189,ENSG00000198959,ENSG00000205213	PRKACA,MAVS,BIRC2,TRPV4,ERBB2IP,TRIM6,VAMP7,SEC14L1,LDLR,PRKACB,TAB3,ITGB2,AP1G1,CD14,PRKCE,RPS6KA3,TGM2,LGR4
GO:0016331	0.0100088	2.64772	3.58325	9	145	morphogenesis of embryonic epithelium	0.115226	ENSG00000072062,ENSG00000106078,ENSG00000120868,ENSG00000138002,ENSG00000140463,ENSG00000142875,ENSG00000149418,ENSG00000165699,ENSG00000184634	PRKACA,COBL,APAF1,IFT172,BBS4,PRKACB,ST14,TSC1,MED12
GO:0002757	0.0100462	1.84736	11.2934	20	457	immune response-activating signal transduction	0.115369	ENSG00000026950,ENSG00000051382,ENSG00000072062,ENSG00000088888,ENSG00000106299,ENSG00000110330,ENSG00000112851,ENSG00000121879,ENSG00000129657,ENSG00000142875,ENSG00000150760,ENSG00000157625,ENSG00000158092,ENSG00000158195,ENSG00000160255,ENSG00000170458,ENSG00000171132,ENSG00000177189,ENSG00000205213,ENSG00000273749	BTN3A1,PIK3CB,PRKACA,MAVS,WASL,BIRC2,ERBB2IP,PIK3CA,SEC14L1,PRKACB,DOCK1,TAB3,NCK1,WASF2,ITGB2,CD14,PRKCE,RPS6KA3,LGR4,CYFIP1
GO:0070085	0.0100956	2.11505	6.91939	14	280	glycosylation	0.115498	ENSG00000089163,ENSG00000092330,ENSG00000102158,ENSG00000102699,ENSG00000104723,ENSG00000111846,ENSG00000114166,ENSG00000115339,ENSG00000116406,ENSG00000117983,ENSG00000128268,ENSG00000136542,ENSG00000158470,ENSG00000257594	SIRT4,TINF2,MAGT1,PARP4,TUSC3,GCNT2,KAT2B,GALNT3,EDEM3,MUC5B,MGAT3,GALNT5,B4GALT5,GALNT4
GO:0005975	0.0101073	1.76514	13.5917	23	550	carbohydrate metabolic process	0.115498	ENSG00000004799,ENSG00000005882,ENSG00000082196,ENSG00000114166,ENSG00000115339,ENSG00000115840,ENSG00000116406,ENSG00000116678,ENSG00000121879,ENSG00000127334,ENSG00000132326,ENSG00000132356,ENSG00000143512,ENSG00000146674,ENSG00000150907,ENSG00000159082,ENSG00000169057,ENSG00000171132,ENSG00000173281,ENSG00000186951,ENSG00000198380,ENSG00000257335,ENSG00000257594	PDK4,PDK2,C1QTNF3,KAT2B,GALNT3,SLC25A12,EDEM3,LEPR,PIK3CA,DYRK2,PER2,PRKAA1,HHIPL2,IGFBP3,FOXO1,SYNJ1,MECP2,PRKCE,PPP1R3B,PPARA,GFPT1,MGAM,GALNT4
GO:0050792	0.0101376	2.18405	6.22745	13	252	regulation of viral process	0.115559	ENSG00000064201,ENSG00000080561,ENSG00000088888,ENSG00000100280,ENSG00000110330,ENSG00000115561,ENSG00000119541,ENSG00000121236,ENSG00000129657,ENSG00000138032,ENSG00000166747,ENSG00000175115,ENSG00000185591	TSPAN32,MID2,MAVS,AP1B1,BIRC2,CHMP3,VPS4B,TRIM6,SEC14L1,PPM1B,AP1G1,PACS1,SP1
GO:0048869	0.0103728	1.30645	95.5864	116	3868	cellular developmental process	0.117771	ENSG00000005108,ENSG00000006468,ENSG00000006747,ENSG00000007237,ENSG00000008086,ENSG00000019186,ENSG00000048052,ENSG00000071242,ENSG00000072062,ENSG00000075223,ENSG00000075711,ENSG00000082196,ENSG00000100271,ENSG00000104133,ENSG00000105738,ENSG00000106078,ENSG00000107263,ENSG00000107731,ENSG00000107798,ENSG00000108175,ENSG00000108946,ENSG00000110330,ENSG00000111199,ENSG00000111424,ENSG00000111846…	THSD7A,ETV1,SCIN,GAS7,CDKL5,CYP24A1,HDAC9,RPS6KA2,PRKACA,SEMA3C,DLG1,C1QTNF3,TTLL1,SPG11,SIPA1L3,COBL,RAPGEF1,UNC5B,LIPA,ZMIZ1,PRKAR1A,BIRC2,TRPV4,VDR,GCNT2,COL4A3BP,BCL6,EFEMP1,RHOU,LEPR,ETV3,KDM5B,TJP2,CSF3R,HOXB5,APAF1,TRIM6,NCOA3,VAMP7,BBS2,HIVEP3,MACF1,MLLT4,CLIP1,PER2,FLOT2,NUMB,KIDINS220,FAIM2,SPRY2,STXBP1,IFT172,TMOD3,BMPR1B,FGD4,BBS4,SSH2,MINK1,ERBB2,LIMD1,RASA1,FBXO38,IGFBP3,ST14,DOCK1,…
GO:0072659	0.0103826	2.35778	4.89299	11	198	protein localization to plasma membrane	0.117771	ENSG00000073969,ENSG00000075711,ENSG00000120756,ENSG00000124333,ENSG00000125124,ENSG00000127603,ENSG00000130779,ENSG00000132589,ENSG00000133961,ENSG00000136854,ENSG00000175115	NSF,DLG1,PLS1,VAMP7,BBS2,MACF1,CLIP1,FLOT2,NUMB,STXBP1,PACS1
GO:0070646	0.0104416	2.62823	3.60797	9	146	protein modification by small protein removal	0.118151	ENSG00000114316,ENSG00000135093,ENSG00000140153,ENSG00000143409,ENSG00000155313,ENSG00000158019,ENSG00000170185,ENSG00000175073,ENSG00000264522	USP4,USP30,WDR20,FAM63A,USP25,BRE,USP38,VCPIP1,OTUD7B
GO:0098586	0.0105075	5.13251	0.864923	4	35	cellular response to virus	0.118607	ENSG00000088888,ENSG00000110330,ENSG00000121236,ENSG00000129657	MAVS,BIRC2,TRIM6,SEC14L1
GO:0048646	0.0105886	1.51862	28.2706	41	1144	anatomical structure formation involved in morphogenesis	0.119231	ENSG00000005108,ENSG00000048052,ENSG00000051382,ENSG00000072062,ENSG00000075223,ENSG00000100271,ENSG00000106078,ENSG00000107731,ENSG00000108946,ENSG00000113916,ENSG00000116678,ENSG00000119535,ENSG00000120868,ENSG00000121879,ENSG00000125124,ENSG00000135472,ENSG00000138002,ENSG00000138594,ENSG00000140199,ENSG00000140463,ENSG00000141736,ENSG00000142875,ENSG00000149418,ENSG00000150907,ENSG00000158195…	THSD7A,HDAC9,PIK3CB,PRKACA,SEMA3C,TTLL1,COBL,UNC5B,PRKAR1A,BCL6,LEPR,CSF3R,APAF1,PIK3CA,BBS2,FAIM2,IFT172,TMOD3,SLC12A6,BBS4,ERBB2,PRKACB,ST14,FOXO1,WASF2,ITGB2,JAK1,SPRY1,CITED2,TSC1,WDR72,AKAP13,EIF2AK3,NDNF,PTPRM,NCMAP,MED12,SEPT9,PPARA,TGM2,FMN1
GO:0051240	0.0106373	1.47185	34.2262	48	1385	positive regulation of multicellular organismal process	0.119489	ENSG00000001561,ENSG00000006747,ENSG00000008086,ENSG00000048052,ENSG00000082196,ENSG00000088888,ENSG00000106078,ENSG00000107263,ENSG00000110330,ENSG00000111199,ENSG00000111424,ENSG00000111846,ENSG00000113916,ENSG00000117139,ENSG00000120756,ENSG00000121236,ENSG00000124151,ENSG00000124333,ENSG00000125124,ENSG00000127603,ENSG00000129657,ENSG00000130779,ENSG00000132356,ENSG00000133961,ENSG00000134313…	ENPP4,SCIN,CDKL5,HDAC9,C1QTNF3,MAVS,COBL,RAPGEF1,BIRC2,TRPV4,VDR,GCNT2,BCL6,KDM5B,PLS1,TRIM6,NCOA3,VAMP7,BBS2,MACF1,SEC14L1,CLIP1,PRKAA1,NUMB,KIDINS220,BMPR1B,BBS4,FBXO38,DOCK1,NCK1,ITGB2,JAK1,SPRY1,CITED2,HIF1AN,MECP2,CD14,MTM1,PRKCE,EIF2AK3,NDNF,PTPRM,HCAR2,NCMAP,BCL9L,ITSN2,LGR4,ADRA2B
GO:0070997	0.0106996	2.099	6.96881	14	282	neuron death	0.119898	ENSG00000107731,ENSG00000116133,ENSG00000120868,ENSG00000121879,ENSG00000135472,ENSG00000136854,ENSG00000145715,ENSG00000149428,ENSG00000151276,ENSG00000165699,ENSG00000169057,ENSG00000173376,ENSG00000186951,ENSG00000197442	UNC5B,DHCR24,APAF1,PIK3CA,FAIM2,STXBP1,RASA1,HYOU1,MAGI1,TSC1,MECP2,NDNF,PPARA,MAP3K5
GO:0022604	0.0107386	1.83442	11.3676	20	460	regulation of cell morphogenesis	0.120044	ENSG00000008086,ENSG00000075223,ENSG00000075711,ENSG00000116574,ENSG00000124333,ENSG00000127603,ENSG00000139132,ENSG00000140463,ENSG00000141298,ENSG00000144791,ENSG00000145715,ENSG00000150760,ENSG00000151491,ENSG00000160255,ENSG00000163110,ENSG00000165288,ENSG00000184640,ENSG00000186174,ENSG00000198399,ENSG00000273749	CDKL5,SEMA3C,DLG1,RHOU,VAMP7,MACF1,FGD4,BBS4,SSH2,LIMD1,RASA1,DOCK1,EPS8,ITGB2,PDLIM5,BRWD3,SEPT9,BCL9L,ITSN2,CYFIP1
GO:0006895	0.0108167	7.44682	0.46953	3	19	Golgi to endosome transport	0.120336	ENSG00000085832,ENSG00000107862,ENSG00000119396	EPS15,GBF1,RAB14
GO:0045663	0.0108167	7.44682	0.46953	3	19	positive regulation of myoblast differentiation	0.120336	ENSG00000146674,ENSG00000166135,ENSG00000197442	IGFBP3,HIF1AN,MAP3K5
GO:0051246	0.0108722	1.36195	60.7423	78	2458	regulation of protein metabolic process	0.120553	ENSG00000051382,ENSG00000052795,ENSG00000068912,ENSG00000071242,ENSG00000072062,ENSG00000073969,ENSG00000075711,ENSG00000077232,ENSG00000078687,ENSG00000084234,ENSG00000088888,ENSG00000089163,ENSG00000092330,ENSG00000100665,ENSG00000102471,ENSG00000102580,ENSG00000107185,ENSG00000107263,ENSG00000108946,ENSG00000110330,ENSG00000111199,ENSG00000111846,ENSG00000113615,ENSG00000113916,ENSG00000114166…	PIK3CB,FNIP2,ERLEC1,RPS6KA2,PRKACA,NSF,DLG1,DNAJC10,TNRC6C,APLP2,MAVS,SIRT4,TINF2,SERPINA4,NDFIP2,DNAJC3,RGP1,RAPGEF1,PRKAR1A,BIRC2,TRPV4,GCNT2,SEC24A,BCL6,KAT2B,USP4,RAB3GAP1,DHCR24,APAF1,TRIM6,PIK3CA,TRAF7,PER2,PRKAA1,FLOT2,KIDINS220,TAOK3,SPRY2,IGF2BP3,ARRB1,PLCE1,SECISBP2L,PELI2,MINK1,ERBB2,PRKACB,LIMD1,IGFBP3,FOXO1,CRIM1,FER,CNKSR3,USP25,DEPTOR,TAB3,NCK1,CUL4B,ITGB2,ZER1,VPS11,ALOX15,SPRY1,T…
GO:0090174	0.0108883	2.60902	3.63268	9	147	organelle membrane fusion	0.120553	ENSG00000108239,ENSG00000115561,ENSG00000124333,ENSG00000136854,ENSG00000160695,ENSG00000167202,ENSG00000175073,ENSG00000198863,ENSG00000204634	TBC1D12,CHMP3,VAMP7,STXBP1,VPS11,TBC1D2B,VCPIP1,RUNDC1,TBC1D8
GO:0006888	0.0109702	2.45658	4.27519	10	173	ER to Golgi vesicle-mediated transport	0.121169	ENSG00000073969,ENSG00000077380,ENSG00000107862,ENSG00000113615,ENSG00000124333,ENSG00000134970,ENSG00000149428,ENSG00000170348,ENSG00000173898,ENSG00000182158	NSF,DYNC1I2,GBF1,SEC24A,VAMP7,TMED7,HYOU1,TMED10,SPTBN2,CREB3L2
GO:0002252	0.0110993	1.6708	16.8536	27	682	immune effector process	0.122303	ENSG00000051382,ENSG00000064201,ENSG00000075711,ENSG00000088888,ENSG00000100280,ENSG00000102580,ENSG00000106299,ENSG00000107862,ENSG00000110330,ENSG00000113916,ENSG00000121236,ENSG00000121879,ENSG00000124333,ENSG00000129657,ENSG00000138032,ENSG00000150760,ENSG00000151422,ENSG00000158092,ENSG00000158195,ENSG00000159842,ENSG00000165699,ENSG00000166747,ENSG00000171132,ENSG00000175115,ENSG00000186470…	PIK3CB,TSPAN32,DLG1,MAVS,AP1B1,DNAJC3,WASL,GBF1,BIRC2,BCL6,TRIM6,PIK3CA,VAMP7,SEC14L1,PPM1B,DOCK1,FER,NCK1,WASF2,ABR,TSC1,AP1G1,PRKCE,PACS1,BTN3A2,BCR,CYFIP1
GO:0010647	0.0112362	1.45063	36.9199	51	1494	positive regulation of cell communication	0.123097	ENSG00000051382,ENSG00000080561,ENSG00000082196,ENSG00000088888,ENSG00000100485,ENSG00000102471,ENSG00000106069,ENSG00000107263,ENSG00000107731,ENSG00000110330,ENSG00000111199,ENSG00000111846,ENSG00000115594,ENSG00000115839,ENSG00000120868,ENSG00000121236,ENSG00000124333,ENSG00000127603,ENSG00000128284,ENSG00000129353,ENSG00000131653,ENSG00000132356,ENSG00000134313,ENSG00000135090,ENSG00000136158…	PIK3CB,MID2,C1QTNF3,MAVS,SOS2,NDFIP2,CHN2,RAPGEF1,UNC5B,BIRC2,TRPV4,GCNT2,IL1R1,RAB3GAP1,APAF1,TRIM6,VAMP7,MACF1,APOL3,SLC44A2,TRAF7,PRKAA1,KIDINS220,TAOK3,SPRY2,ARRB1,IFT172,PLCE1,BMPR1B,PELI2,MINK1,ERBB2,IGFBP3,EPS8,DISP1,TAB3,NCK1,ALOX15,CITED2,MECP2,AKAP13,PRKCE,HCAR2,MAP3K5,ITSN2,UNC13B,RASGEF1A,TGM2,MBD5,LGR4,ADRA2B
GO:0007507	0.0112631	1.7965	12.1831	21	493	heart development	0.123097	ENSG00000046604,ENSG00000048052,ENSG00000071242,ENSG00000075223,ENSG00000100280,ENSG00000108175,ENSG00000108946,ENSG00000113163,ENSG00000115234,ENSG00000136169,ENSG00000138002,ENSG00000138193,ENSG00000140463,ENSG00000141736,ENSG00000154639,ENSG00000163110,ENSG00000164442,ENSG00000165699,ENSG00000170776,ENSG00000184634,ENSG00000186951	DSG2,HDAC9,RPS6KA2,SEMA3C,AP1B1,ZMIZ1,PRKAR1A,COL4A3BP,SNX17,SETDB2,IFT172,PLCE1,BBS4,ERBB2,CXADR,PDLIM5,CITED2,TSC1,AKAP13,MED12,PPARA
GO:0048667	0.0112631	1.7965	12.1831	21	493	cell morphogenesis involved in neuron differentiation	0.123097	ENSG00000006468,ENSG00000008086,ENSG00000075223,ENSG00000104133,ENSG00000106078,ENSG00000107731,ENSG00000124333,ENSG00000127603,ENSG00000133961,ENSG00000134313,ENSG00000136854,ENSG00000138696,ENSG00000141298,ENSG00000141503,ENSG00000141736,ENSG00000163110,ENSG00000173482,ENSG00000173898,ENSG00000198513,ENSG00000248905,ENSG00000273749	ETV1,CDKL5,SEMA3C,SPG11,COBL,UNC5B,VAMP7,MACF1,NUMB,KIDINS220,STXBP1,BMPR1B,SSH2,MINK1,ERBB2,PDLIM5,PTPRM,SPTBN2,ATL1,FMN1,CYFIP1
GO:0000904	0.0113231	1.70373	15.2968	25	619	cell morphogenesis involved in differentiation	0.123097	ENSG00000006468,ENSG00000008086,ENSG00000075223,ENSG00000104133,ENSG00000105738,ENSG00000106078,ENSG00000107731,ENSG00000124333,ENSG00000127603,ENSG00000133961,ENSG00000134313,ENSG00000136854,ENSG00000138696,ENSG00000141298,ENSG00000141503,ENSG00000141736,ENSG00000149418,ENSG00000150760,ENSG00000151422,ENSG00000163110,ENSG00000173482,ENSG00000173898,ENSG00000198513,ENSG00000248905,ENSG00000273749	ETV1,CDKL5,SEMA3C,SPG11,SIPA1L3,COBL,UNC5B,VAMP7,MACF1,NUMB,KIDINS220,STXBP1,BMPR1B,SSH2,MINK1,ERBB2,ST14,DOCK1,FER,PDLIM5,PTPRM,SPTBN2,ATL1,FMN1,CYFIP1
GO:0071453	0.0113492	2.59009	3.65739	9	148	cellular response to oxygen levels	0.123097	ENSG00000089163,ENSG00000132356,ENSG00000149428,ENSG00000150907,ENSG00000164442,ENSG00000165699,ENSG00000166135,ENSG00000171132,ENSG00000173376	SIRT4,PRKAA1,HYOU1,FOXO1,CITED2,TSC1,HIF1AN,PRKCE,NDNF
GO:0001678	0.0113675	2.78003	3.03959	8	123	cellular glucose homeostasis	0.123097	ENSG00000072062,ENSG00000121879,ENSG00000137486,ENSG00000150907,ENSG00000155093,ENSG00000166263,ENSG00000171132,ENSG00000198722	PRKACA,PIK3CA,ARRB1,FOXO1,PTPRN2,STXBP4,PRKCE,UNC13B
GO:0030032	0.0113679	3.9828	1.35917	5	55	lamellipodium assembly	0.123097	ENSG00000141298,ENSG00000151422,ENSG00000158092,ENSG00000158195,ENSG00000273749	SSH2,FER,NCK1,WASF2,CYFIP1
GO:0006904	0.0115955	4.97181	0.889635	4	36	vesicle docking involved in exocytosis	0.123097	ENSG00000136854,ENSG00000144036,ENSG00000160695,ENSG00000198722	STXBP1,EXOC6B,VPS11,UNC13B
GO:0031670	0.0115955	4.97181	0.889635	4	36	cellular response to nutrient	0.123097	ENSG00000005882,ENSG00000019186,ENSG00000111424,ENSG00000197256	PDK2,CYP24A1,VDR,KANK2
GO:0032007	0.0115955	4.97181	0.889635	4	36	negative regulation of TOR signaling	0.123097	ENSG00000132356,ENSG00000155792,ENSG00000165699,ENSG00000171100	PRKAA1,DEPTOR,TSC1,MTM1
GO:0051693	0.0115955	4.97181	0.889635	4	36	actin filament capping	0.123097	ENSG00000006747,ENSG00000138594,ENSG00000151491,ENSG00000173898	SCIN,TMOD3,EPS8,SPTBN2
GO:0061028	0.0115955	4.97181	0.889635	4	36	establishment of endothelial barrier	0.123097	ENSG00000107263,ENSG00000119139,ENSG00000130396,ENSG00000152939	RAPGEF1,TJP2,MLLT4,MARVELD2
GO:0034638	0.011783	15.8585	0.172985	2	7	phosphatidylcholine catabolic process	0.123097	ENSG00000130164,ENSG00000135241	LDLR,PNPLA8
GO:0034983	0.011783	15.8585	0.172985	2	7	peptidyl-lysine deacetylation	0.123097	ENSG00000048052,ENSG00000089163	HDAC9,SIRT4
GO:0035947	0.011783	15.8585	0.172985	2	7	regulation of gluconeogenesis by regulation of transcription from RNA polymerase II promoter	0.123097	ENSG00000114166,ENSG00000150907	KAT2B,FOXO1
GO:0043320	0.011783	15.8585	0.172985	2	7	natural killer cell degranulation	0.123097	ENSG00000124333,ENSG00000166747	VAMP7,AP1G1
GO:0051386	0.011783	15.8585	0.172985	2	7	regulation of neurotrophin TRK receptor signaling pathway	0.123097	ENSG00000136158,ENSG00000164056	SPRY2,SPRY1
GO:0060449	0.011783	15.8585	0.172985	2	7	bud elongation involved in lung branching	0.123097	ENSG00000136158,ENSG00000164056	SPRY2,SPRY1
GO:0071472	0.011783	15.8585	0.172985	2	7	cellular response to salt stress	0.123097	ENSG00000111199,ENSG00000140199	TRPV4,SLC12A6
GO:0071476	0.011783	15.8585	0.172985	2	7	cellular hypotonic response	0.123097	ENSG00000111199,ENSG00000140199	TRPV4,SLC12A6
GO:0071649	0.011783	15.8585	0.172985	2	7	regulation of chemokine (C-C motif) ligand 5 production	0.123097	ENSG00000088888,ENSG00000111199	MAVS,TRPV4
GO:1901620	0.011783	15.8585	0.172985	2	7	regulation of smoothened signaling pathway involved in dorsal/ventral neural tube patterning	0.123097	ENSG00000072062,ENSG00000142875	PRKACA,PRKACB
GO:2000601	0.011783	15.8585	0.172985	2	7	positive regulation of Arp2/3 complex-mediated actin nucleation	0.123097	ENSG00000106299,ENSG00000273749	WASL,CYFIP1
GO:0016310	0.0118576	1.3756	53.7735	70	2176	phosphorylation	0.123597	ENSG00000004799,ENSG00000005882,ENSG00000008086,ENSG00000051382,ENSG00000052795,ENSG00000058091,ENSG00000071242,ENSG00000072062,ENSG00000075711,ENSG00000077232,ENSG00000088888,ENSG00000102580,ENSG00000107263,ENSG00000108946,ENSG00000111199,ENSG00000111846,ENSG00000113163,ENSG00000114166,ENSG00000115380,ENSG00000117461,ENSG00000121236,ENSG00000121879,ENSG00000127334,ENSG00000131653,ENSG00000132356…	PDK4,PDK2,CDKL5,PIK3CB,FNIP2,CDK14,RPS6KA2,PRKACA,DLG1,DNAJC10,MAVS,DNAJC3,RAPGEF1,PRKAR1A,TRPV4,GCNT2,COL4A3BP,KAT2B,EFEMP1,PIK3R3,TRIM6,PIK3CA,DYRK2,TRAF7,PRKAA1,PIK3C2B,KIDINS220,TAOK3,SPRY2,ARRB1,PLCE1,BMPR1B,PAPSS1,PELI2,MINK1,ERBB2,PRKACB,PI4KB,LIMD1,RASA1,IGFBP3,PIP4K2A,FOXO1,FER,CNKSR3,DEPTOR,TAB3,NCK1,MORC3,ITGB2,ALOX15,CMPK1,JAK1,SPRY1,TSC1,MECP2,AKAP13,PRKCE,EIF2AK3,SPTBN2,RPS6KA3,SMYD…
GO:0043408	0.0123998	1.67111	16.2111	26	656	regulation of MAPK cascade	0.128515	ENSG00000051382,ENSG00000075711,ENSG00000107263,ENSG00000111199,ENSG00000111846,ENSG00000131653,ENSG00000132356,ENSG00000134313,ENSG00000135090,ENSG00000136158,ENSG00000137486,ENSG00000138193,ENSG00000139946,ENSG00000141503,ENSG00000141736,ENSG00000146674,ENSG00000150907,ENSG00000153721,ENSG00000157625,ENSG00000161905,ENSG00000164056,ENSG00000170776,ENSG00000171132,ENSG00000188554,ENSG00000197442…	PIK3CB,DLG1,RAPGEF1,TRPV4,GCNT2,TRAF7,PRKAA1,KIDINS220,TAOK3,SPRY2,ARRB1,PLCE1,PELI2,MINK1,ERBB2,IGFBP3,FOXO1,CNKSR3,TAB3,ALOX15,SPRY1,AKAP13,PRKCE,NBR1,MAP3K5,ADRA2B
GO:0051223	0.0124536	1.63794	17.8174	28	721	regulation of protein transport	0.128515	ENSG00000068912,ENSG00000072062,ENSG00000082196,ENSG00000088888,ENSG00000089163,ENSG00000102471,ENSG00000111199,ENSG00000113615,ENSG00000116574,ENSG00000121236,ENSG00000124333,ENSG00000127334,ENSG00000132326,ENSG00000137486,ENSG00000138032,ENSG00000141736,ENSG00000143457,ENSG00000156675,ENSG00000160695,ENSG00000164144,ENSG00000166263,ENSG00000170458,ENSG00000170745,ENSG00000171132,ENSG00000182782…	ERLEC1,PRKACA,C1QTNF3,MAVS,SIRT4,NDFIP2,TRPV4,SEC24A,RHOU,TRIM6,VAMP7,DYRK2,PER2,ARRB1,PPM1B,ERBB2,GOLPH3L,RAB11FIP1,VPS11,ARFIP1,STXBP4,CD14,KCNS3,PRKCE,HCAR2,UNC13B,SREBF2,LGR4
GO:0010869	0.0124961	7.00834	0.494242	3	20	regulation of receptor biosynthetic process	0.128515	ENSG00000113615,ENSG00000118454,ENSG00000186951	SEC24A,ANKRD13C,PPARA
GO:0039528	0.0124961	7.00834	0.494242	3	20	cytoplasmic pattern recognition receptor signaling pathway in response to virus	0.128515	ENSG00000088888,ENSG00000110330,ENSG00000129657	MAVS,BIRC2,SEC14L1
GO:0042762	0.0124961	7.00834	0.494242	3	20	regulation of sulfur metabolic process	0.128515	ENSG00000004799,ENSG00000005882,ENSG00000185591	PDK4,PDK2,SP1
GO:0044321	0.0124961	7.00834	0.494242	3	20	response to leptin	0.128515	ENSG00000116678,ENSG00000125124,ENSG00000140463	LEPR,BBS2,BBS4
GO:0051047	0.01253	1.95041	8.55038	16	346	positive regulation of secretion	0.128578	ENSG00000006747,ENSG00000082196,ENSG00000111199,ENSG00000113615,ENSG00000115839,ENSG00000119541,ENSG00000121236,ENSG00000124333,ENSG00000136854,ENSG00000137486,ENSG00000143457,ENSG00000166747,ENSG00000170458,ENSG00000171132,ENSG00000182782,ENSG00000198722	SCIN,C1QTNF3,TRPV4,SEC24A,RAB3GAP1,VPS4B,TRIM6,VAMP7,STXBP1,ARRB1,GOLPH3L,AP1G1,CD14,PRKCE,HCAR2,UNC13B
GO:0045089	0.0126826	2.05227	7.11708	14	288	positive regulation of innate immune response	0.12957	ENSG00000072062,ENSG00000088888,ENSG00000110330,ENSG00000112851,ENSG00000121236,ENSG00000129657,ENSG00000142875,ENSG00000157625,ENSG00000160255,ENSG00000166747,ENSG00000170458,ENSG00000171132,ENSG00000177189,ENSG00000205213	PRKACA,MAVS,BIRC2,ERBB2IP,TRIM6,SEC14L1,PRKACB,TAB3,ITGB2,AP1G1,CD14,PRKCE,RPS6KA3,LGR4
GO:0046879	0.0126826	2.05227	7.11708	14	288	hormone secretion	0.12957	ENSG00000082196,ENSG00000089163,ENSG00000111199,ENSG00000124333,ENSG00000132326,ENSG00000137486,ENSG00000155093,ENSG00000156675,ENSG00000166263,ENSG00000170745,ENSG00000171132,ENSG00000172071,ENSG00000182782,ENSG00000274286	C1QTNF3,SIRT4,TRPV4,VAMP7,PER2,ARRB1,PTPRN2,RAB11FIP1,STXBP4,KCNS3,PRKCE,EIF2AK3,HCAR2,ADRA2B
GO:0043123	0.0127311	2.39715	4.37404	10	177	positive regulation of I-kappaB kinase/NF-kappaB signaling	0.129779	ENSG00000080561,ENSG00000088888,ENSG00000102471,ENSG00000110330,ENSG00000128284,ENSG00000129353,ENSG00000139946,ENSG00000170776,ENSG00000171132,ENSG00000198959	MID2,MAVS,NDFIP2,BIRC2,APOL3,SLC44A2,PELI2,AKAP13,PRKCE,TGM2
GO:0008285	0.0128854	1.68313	15.4698	25	626	negative regulation of cell proliferation	0.130625	ENSG00000006747,ENSG00000064201,ENSG00000071242,ENSG00000075711,ENSG00000092330,ENSG00000107263,ENSG00000107816,ENSG00000108946,ENSG00000111424,ENSG00000113916,ENSG00000114166,ENSG00000116133,ENSG00000117036,ENSG00000132326,ENSG00000136158,ENSG00000138002,ENSG00000138696,ENSG00000141736,ENSG00000146674,ENSG00000159256,ENSG00000164056,ENSG00000165699,ENSG00000170477,ENSG00000173482,ENSG00000197256	SCIN,TSPAN32,RPS6KA2,DLG1,TINF2,RAPGEF1,LZTS2,PRKAR1A,VDR,BCL6,KAT2B,DHCR24,ETV3,PER2,SPRY2,IFT172,BMPR1B,ERBB2,IGFBP3,MORC3,SPRY1,TSC1,KRT4,PTPRM,KANK2
GO:0046486	0.0128988	1.90084	9.31646	17	377	glycerolipid metabolic process	0.130625	ENSG00000051382,ENSG00000100330,ENSG00000108389,ENSG00000109452,ENSG00000117461,ENSG00000121879,ENSG00000130164,ENSG00000133056,ENSG00000135241,ENSG00000138193,ENSG00000141736,ENSG00000143393,ENSG00000150867,ENSG00000159082,ENSG00000161905,ENSG00000169057,ENSG00000171100	PIK3CB,MTMR3,MTMR4,INPP4B,PIK3R3,PIK3CA,LDLR,PIK3C2B,PNPLA8,PLCE1,ERBB2,PI4KB,PIP4K2A,SYNJ1,ALOX15,MECP2,MTM1
GO:0050708	0.0128988	1.90084	9.31646	17	377	regulation of protein secretion	0.130625	ENSG00000082196,ENSG00000089163,ENSG00000111199,ENSG00000113615,ENSG00000121236,ENSG00000132326,ENSG00000137486,ENSG00000143457,ENSG00000156675,ENSG00000164144,ENSG00000166263,ENSG00000170458,ENSG00000170745,ENSG00000171132,ENSG00000182782,ENSG00000198722,ENSG00000205213	C1QTNF3,SIRT4,TRPV4,SEC24A,TRIM6,PER2,ARRB1,GOLPH3L,RAB11FIP1,ARFIP1,STXBP4,CD14,KCNS3,PRKCE,HCAR2,UNC13B,LGR4
GO:0043405	0.0130077	1.9898	7.85845	15	318	regulation of MAP kinase activity	0.13144	ENSG00000051382,ENSG00000107263,ENSG00000131653,ENSG00000132356,ENSG00000134313,ENSG00000135090,ENSG00000136158,ENSG00000137486,ENSG00000138193,ENSG00000141736,ENSG00000157625,ENSG00000164056,ENSG00000170776,ENSG00000197442,ENSG00000274286	PIK3CB,RAPGEF1,TRAF7,PRKAA1,KIDINS220,TAOK3,SPRY2,ARRB1,PLCE1,ERBB2,TAB3,SPRY1,AKAP13,MAP3K5,ADRA2B
GO:0032922	0.0131483	3.82914	1.40859	5	57	circadian regulation of gene expression	0.131996	ENSG00000108557,ENSG00000132326,ENSG00000186951,ENSG00000198380,ENSG00000205213	RAI1,PER2,PPARA,GFPT1,LGR4
GO:0048278	0.0131483	3.82914	1.40859	5	57	vesicle docking	0.131996	ENSG00000073969,ENSG00000136854,ENSG00000144036,ENSG00000160695,ENSG00000198722	NSF,STXBP1,EXOC6B,VPS11,UNC13B
GO:0099024	0.0131483	3.82914	1.40859	5	57	plasma membrane invagination	0.131996	ENSG00000124333,ENSG00000144366,ENSG00000150760,ENSG00000161905,ENSG00000178996	VAMP7,GULP1,DOCK1,ALOX15,SNX18
GO:0007009	0.0132877	2.10361	6.44986	13	261	plasma membrane organization	0.133107	ENSG00000073969,ENSG00000075711,ENSG00000106299,ENSG00000114698,ENSG00000120756,ENSG00000124333,ENSG00000125124,ENSG00000127603,ENSG00000130779,ENSG00000132589,ENSG00000133961,ENSG00000136854,ENSG00000175115	NSF,DLG1,WASL,PLSCR4,PLS1,VAMP7,BBS2,MACF1,CLIP1,FLOT2,NUMB,STXBP1,PACS1
GO:1903532	0.0133524	1.98313	7.88316	15	319	positive regulation of secretion by cell	0.133466	ENSG00000082196,ENSG00000111199,ENSG00000113615,ENSG00000115839,ENSG00000119541,ENSG00000121236,ENSG00000124333,ENSG00000136854,ENSG00000137486,ENSG00000143457,ENSG00000166747,ENSG00000170458,ENSG00000171132,ENSG00000182782,ENSG00000198722	C1QTNF3,TRPV4,SEC24A,RAB3GAP1,VPS4B,TRIM6,VAMP7,STXBP1,ARRB1,GOLPH3L,AP1G1,CD14,PRKCE,HCAR2,UNC13B
GO:0044710	0.0137051	1.2876	99.2932	119	4018	single-organism metabolic process	0.136696	ENSG00000001561,ENSG00000001630,ENSG00000004799,ENSG00000005882,ENSG00000008283,ENSG00000019186,ENSG00000021762,ENSG00000047457,ENSG00000051382,ENSG00000067064,ENSG00000068912,ENSG00000073734,ENSG00000075711,ENSG00000077232,ENSG00000082196,ENSG00000089163,ENSG00000092330,ENSG00000100330,ENSG00000100439,ENSG00000101846,ENSG00000102158,ENSG00000102699,ENSG00000102910,ENSG00000104549,ENSG00000104723…	ENPP4,CYP51A1,PDK4,PDK2,CYB561,CYP24A1,OSBPL5,CP,PIK3CB,IDI1,ERLEC1,ABCB11,DLG1,DNAJC10,C1QTNF3,SIRT4,TINF2,MTMR3,ABHD4,STS,MAGT1,PARP4,LONP2,SQLE,TUSC3,ITGB8,KDM4C,RAPGEF1,LIPA,MTMR4,INPP4B,TRPV4,VDR,GCNT2,COL4A3BP,BCL6,KAT2B,SNX17,GALNT3,PECR,SLC25A12,DHCR24,EDEM3,LEPR,KDM5B,PIK3R3,MUC5B,TJP2,PIK3CA,DYRK2,MGAT3,LDLR,TRAF7,HSD17B7,PER2,PRKAA1,PIK3C2B,KIDINS220,TAOK3,PNPLA8,SPRY2,GALNT5,ARRB1,LOX…
GO:0002682	0.0138336	1.46349	32.1751	45	1302	regulation of immune system process	0.137487	ENSG00000006747,ENSG00000026950,ENSG00000051382,ENSG00000064201,ENSG00000072062,ENSG00000075711,ENSG00000088888,ENSG00000100280,ENSG00000106299,ENSG00000108946,ENSG00000110330,ENSG00000111199,ENSG00000112851,ENSG00000113916,ENSG00000115594,ENSG00000117983,ENSG00000119535,ENSG00000121236,ENSG00000121879,ENSG00000124333,ENSG00000129657,ENSG00000132589,ENSG00000138032,ENSG00000141736,ENSG00000142875…	SCIN,BTN3A1,PIK3CB,TSPAN32,PRKACA,DLG1,MAVS,AP1B1,WASL,PRKAR1A,BIRC2,TRPV4,ERBB2IP,BCL6,IL1R1,MUC5B,CSF3R,TRIM6,PIK3CA,VAMP7,SEC14L1,FLOT2,PPM1B,ERBB2,PRKACB,DOCK1,FER,CXADR,TAB3,NCK1,WASF2,ABR,ITGB2,ALOX15,JAK1,PIGR,AP1G1,CD14,PRKCE,PACS1,RPS6KA3,HCAR2,BCR,LGR4,CYFIP1
GO:0070201	0.0138437	1.59507	19.5967	30	793	regulation of establishment of protein localization	0.137487	ENSG00000068912,ENSG00000072062,ENSG00000075711,ENSG00000082196,ENSG00000088888,ENSG00000089163,ENSG00000102471,ENSG00000111199,ENSG00000113615,ENSG00000116574,ENSG00000120756,ENSG00000121236,ENSG00000124333,ENSG00000127334,ENSG00000132326,ENSG00000137486,ENSG00000138032,ENSG00000141736,ENSG00000143457,ENSG00000156675,ENSG00000160695,ENSG00000164144,ENSG00000166263,ENSG00000170458,ENSG00000170745…	ERLEC1,PRKACA,DLG1,C1QTNF3,MAVS,SIRT4,NDFIP2,TRPV4,SEC24A,RHOU,PLS1,TRIM6,VAMP7,DYRK2,PER2,ARRB1,PPM1B,ERBB2,GOLPH3L,RAB11FIP1,VPS11,ARFIP1,STXBP4,CD14,KCNS3,PRKCE,HCAR2,UNC13B,SREBF2,LGR4
GO:0006900	0.013934	2.91019	2.54535	7	103	membrane budding	0.138087	ENSG00000073969,ENSG00000106299,ENSG00000107862,ENSG00000113615,ENSG00000115561,ENSG00000119541,ENSG00000170348	NSF,WASL,GBF1,SEC24A,CHMP3,VPS4B,TMED10
GO:0002886	0.0139823	4.67878	0.93906	4	38	regulation of myeloid leukocyte mediated immunity	0.138269	ENSG00000124333,ENSG00000151422,ENSG00000159842,ENSG00000186716	VAMP7,FER,ABR,BCR
GO:0050891	0.0141052	3.75666	1.4333	5	58	multicellular organismal water homeostasis	0.138609	ENSG00000072062,ENSG00000108946,ENSG00000111199,ENSG00000142875,ENSG00000167306	PRKACA,PRKAR1A,TRPV4,PRKACB,MYO5B
GO:0038093	0.0141144	2.24826	5.1154	11	207	Fc receptor signaling pathway	0.138609	ENSG00000051382,ENSG00000106299,ENSG00000121879,ENSG00000150760,ENSG00000151422,ENSG00000157625,ENSG00000158092,ENSG00000158195,ENSG00000162896,ENSG00000171132,ENSG00000273749	PIK3CB,WASL,PIK3CA,DOCK1,FER,TAB3,NCK1,WASF2,PIGR,PRKCE,CYFIP1
GO:1901701	0.0141189	1.55727	22.0926	33	894	cellular response to oxygen-containing compound	0.138609	ENSG00000004799,ENSG00000005882,ENSG00000019186,ENSG00000048052,ENSG00000071242,ENSG00000072062,ENSG00000107263,ENSG00000108946,ENSG00000111424,ENSG00000114166,ENSG00000114698,ENSG00000117461,ENSG00000121879,ENSG00000124151,ENSG00000130164,ENSG00000132356,ENSG00000137486,ENSG00000140092,ENSG00000142875,ENSG00000150907,ENSG00000151422,ENSG00000155093,ENSG00000165699,ENSG00000166263,ENSG00000168710…	PDK4,PDK2,CYP24A1,HDAC9,RPS6KA2,PRKACA,RAPGEF1,PRKAR1A,VDR,KAT2B,PLSCR4,PIK3R3,PIK3CA,NCOA3,LDLR,PRKAA1,ARRB1,FBLN5,PRKACB,FOXO1,FER,PTPRN2,TSC1,STXBP4,AHCYL1,CD14,PRKCE,SMYD3,SP1,KANK2,MAP3K5,UNC13B,MBD5
GO:0048812	0.0142872	1.72809	13.2457	22	536	neuron projection morphogenesis	0.138609	ENSG00000006468,ENSG00000008086,ENSG00000075223,ENSG00000104133,ENSG00000106078,ENSG00000107731,ENSG00000124333,ENSG00000127603,ENSG00000133961,ENSG00000134313,ENSG00000136854,ENSG00000138696,ENSG00000141298,ENSG00000141503,ENSG00000141736,ENSG00000163110,ENSG00000173482,ENSG00000173898,ENSG00000198399,ENSG00000198513,ENSG00000248905,ENSG00000273749	ETV1,CDKL5,SEMA3C,SPG11,COBL,UNC5B,VAMP7,MACF1,NUMB,KIDINS220,STXBP1,BMPR1B,SSH2,MINK1,ERBB2,PDLIM5,PTPRM,SPTBN2,ITSN2,ATL1,FMN1,CYFIP1
GO:0002691	0.0143161	6.61858	0.518954	3	21	regulation of cellular extravasation	0.138609	ENSG00000115594,ENSG00000159842,ENSG00000186716	IL1R1,ABR,BCR
GO:0006706	0.0143161	6.61858	0.518954	3	21	steroid catabolic process	0.138609	ENSG00000019186,ENSG00000101846,ENSG00000115234	CYP24A1,STS,SNX17
GO:0034505	0.0143161	6.61858	0.518954	3	21	tooth mineralization	0.138609	ENSG00000150907,ENSG00000166415,ENSG00000186951	FOXO1,WDR72,PPARA
GO:0042987	0.0143161	6.61858	0.518954	3	21	amyloid precursor protein catabolic process	0.138609	ENSG00000116133,ENSG00000132589,ENSG00000170348	DHCR24,FLOT2,TMED10
GO:0060972	0.0143161	6.61858	0.518954	3	21	left/right pattern formation	0.138609	ENSG00000136169,ENSG00000138002,ENSG00000164442	SETDB2,IFT172,CITED2
GO:0090162	0.0143161	6.61858	0.518954	3	21	establishment of epithelial cell polarity	0.138609	ENSG00000105738,ENSG00000114541,ENSG00000151474	SIPA1L3,FRMD4B,FRMD4A
GO:0000122	0.0149683	1.61121	18.0893	28	732	negative regulation of transcription from RNA polymerase II promoter	0.144402	ENSG00000048052,ENSG00000052795,ENSG00000075711,ENSG00000111199,ENSG00000111424,ENSG00000111707,ENSG00000111727,ENSG00000113916,ENSG00000117036,ENSG00000117625,ENSG00000119669,ENSG00000132326,ENSG00000150907,ENSG00000151090,ENSG00000153814,ENSG00000158092,ENSG00000164442,ENSG00000165156,ENSG00000166135,ENSG00000168310,ENSG00000169057,ENSG00000171940,ENSG00000175745,ENSG00000184939,ENSG00000186951…	HDAC9,FNIP2,DLG1,TRPV4,VDR,SUDS3,HCFC2,BCL6,ETV3,RCOR3,IRF2BPL,PER2,FOXO1,THRB,JAZF1,NCK1,CITED2,ZHX1,HIF1AN,IRF2,MECP2,ZNF217,NR2F1,ZFP90,PPARA,KANK2,SREBF2,OTUD7B
GO:0031032	0.0149949	2.46484	3.83037	9	155	actomyosin structure organization	0.144402	ENSG00000108946,ENSG00000137486,ENSG00000138594,ENSG00000140463,ENSG00000158195,ENSG00000159023,ENSG00000165699,ENSG00000170776,ENSG00000198752	PRKAR1A,ARRB1,TMOD3,BBS4,WASF2,EPB41,TSC1,AKAP13,CDC42BPB
GO:0010508	0.0150392	3.18916	2.00168	6	81	positive regulation of autophagy	0.144402	ENSG00000051382,ENSG00000080561,ENSG00000115839,ENSG00000132356,ENSG00000150867,ENSG00000150907	PIK3CB,MID2,RAB3GAP1,PRKAA1,PIP4K2A,FOXO1
GO:1905037	0.0150392	3.18916	2.00168	6	81	autophagosome organization	0.144402	ENSG00000100330,ENSG00000108239,ENSG00000115839,ENSG00000133056,ENSG00000150867,ENSG00000171100	MTMR3,TBC1D12,RAB3GAP1,PIK3C2B,PIP4K2A,MTM1
GO:0016266	0.0151079	3.68687	1.45801	5	59	O-glycan processing	0.14476	ENSG00000115339,ENSG00000117983,ENSG00000136542,ENSG00000158470,ENSG00000257594	GALNT3,MUC5B,GALNT5,B4GALT5,GALNT4
GO:0030835	0.015284	4.54482	0.963772	4	39	negative regulation of actin filament depolymerization	0.146145	ENSG00000006747,ENSG00000138594,ENSG00000151491,ENSG00000173898	SCIN,TMOD3,EPS8,SPTBN2
GO:0044802	0.0153188	1.55759	21.4007	32	866	single-organism membrane organization	0.146149	ENSG00000008952,ENSG00000025796,ENSG00000073969,ENSG00000075711,ENSG00000100242,ENSG00000106299,ENSG00000108239,ENSG00000114698,ENSG00000115561,ENSG00000115839,ENSG00000120756,ENSG00000124333,ENSG00000125124,ENSG00000127603,ENSG00000130779,ENSG00000132589,ENSG00000133961,ENSG00000135093,ENSG00000136854,ENSG00000141736,ENSG00000160255,ENSG00000160695,ENSG00000162896,ENSG00000164209,ENSG00000167202…	SEC62,SEC63,NSF,DLG1,SUN2,WASL,TBC1D12,PLSCR4,CHMP3,RAB3GAP1,PLS1,VAMP7,BBS2,MACF1,CLIP1,FLOT2,NUMB,USP30,STXBP1,ERBB2,ITGB2,VPS11,PIGR,SLC25A46,TBC1D2B,MFN1,VCPIP1,PACS1,SRPR,RUNDC1,BAG6,TBC1D8
GO:0002692	0.0154557	13.2146	0.197697	2	8	negative regulation of cellular extravasation	0.146149	ENSG00000159842,ENSG00000186716	ABR,BCR
GO:0006971	0.0154557	13.2146	0.197697	2	8	hypotonic response	0.146149	ENSG00000111199,ENSG00000140199	TRPV4,SLC12A6
GO:0038180	0.0154557	13.2146	0.197697	2	8	nerve growth factor signaling pathway	0.146149	ENSG00000107263,ENSG00000134313	RAPGEF1,KIDINS220
GO:0071609	0.0154557	13.2146	0.197697	2	8	chemokine (C-C motif) ligand 5 production	0.146149	ENSG00000088888,ENSG00000111199	MAVS,TRPV4
GO:0031214	0.0154739	2.61938	3.21257	8	130	biomineral tissue development	0.146149	ENSG00000138696,ENSG00000150907,ENSG00000161905,ENSG00000166415,ENSG00000172071,ENSG00000186951,ENSG00000188554,ENSG00000205213	BMPR1B,FOXO1,ALOX15,WDR72,EIF2AK3,PPARA,NBR1,LGR4
GO:0042058	0.0158996	3.14701	2.02639	6	82	regulation of epidermal growth factor receptor signaling pathway	0.149864	ENSG00000085832,ENSG00000115145,ENSG00000136158,ENSG00000151422,ENSG00000164056,ENSG00000274286	EPS15,STAM2,SPRY2,FER,SPRY1,ADRA2B
GO:0002758	0.0160378	2.1189	5.90619	12	239	innate immune response-activating signal transduction	0.150814	ENSG00000072062,ENSG00000088888,ENSG00000110330,ENSG00000112851,ENSG00000129657,ENSG00000142875,ENSG00000157625,ENSG00000160255,ENSG00000170458,ENSG00000171132,ENSG00000177189,ENSG00000205213	PRKACA,MAVS,BIRC2,ERBB2IP,SEC14L1,PRKACB,TAB3,ITGB2,CD14,PRKCE,RPS6KA3,LGR4
GO:1990778	0.0160655	2.20274	5.21425	11	211	protein localization to cell periphery	0.150814	ENSG00000073969,ENSG00000075711,ENSG00000120756,ENSG00000124333,ENSG00000125124,ENSG00000127603,ENSG00000130779,ENSG00000132589,ENSG00000133961,ENSG00000136854,ENSG00000175115	NSF,DLG1,PLS1,VAMP7,BBS2,MACF1,CLIP1,FLOT2,NUMB,STXBP1,PACS1
GO:0030010	0.0161055	2.82147	2.61948	7	106	establishment of cell polarity	0.150883	ENSG00000105738,ENSG00000107862,ENSG00000114541,ENSG00000132589,ENSG00000136158,ENSG00000151474,ENSG00000164056	SIPA1L3,GBF1,FRMD4B,FLOT2,SPRY2,FRMD4A,SPRY1
GO:0031324	0.0161693	1.34699	56.3683	72	2281	negative regulation of cellular metabolic process	0.151174	ENSG00000048052,ENSG00000052795,ENSG00000075711,ENSG00000076108,ENSG00000077232,ENSG00000078687,ENSG00000080561,ENSG00000082196,ENSG00000084234,ENSG00000089163,ENSG00000092330,ENSG00000100665,ENSG00000102580,ENSG00000107185,ENSG00000107263,ENSG00000108946,ENSG00000110330,ENSG00000111199,ENSG00000111424,ENSG00000111707,ENSG00000111727,ENSG00000113916,ENSG00000114166,ENSG00000114316,ENSG00000116133…	HDAC9,FNIP2,DLG1,BAZ2A,DNAJC10,TNRC6C,MID2,C1QTNF3,APLP2,SIRT4,TINF2,SERPINA4,DNAJC3,RGP1,RAPGEF1,PRKAR1A,BIRC2,TRPV4,VDR,SUDS3,HCFC2,BCL6,KAT2B,USP4,DHCR24,LEPR,ETV3,KDM5B,RCOR3,IRF2BPL,TRIM6,PER2,PRKAA1,TAOK3,SPRY2,SETDB2,IGF2BP3,ARRB1,LIMD1,IGFBP3,FOXO1,CRIM1,THRB,CNKSR3,JAZF1,DEPTOR,NCK1,SPRY1,CITED2,ZHX1,TSC1,HIF1AN,IRF2,MECP2,MTM1,PRKCE,ZNF217,EIF2AK3,PHF8,NR2F1,RPS6KA3,ZFP90,SMYD3,PPARA,MP…
GO:0042119	0.0162784	6.26985	0.543666	3	22	neutrophil activation	0.151888	ENSG00000124333,ENSG00000159842,ENSG00000186716	VAMP7,ABR,BCR
GO:0032502	0.0165988	1.25149	141.081	162	5709	developmental process	0.154346	ENSG00000005108,ENSG00000006468,ENSG00000006747,ENSG00000007237,ENSG00000008086,ENSG00000019186,ENSG00000025796,ENSG00000046604,ENSG00000048052,ENSG00000051382,ENSG00000071242,ENSG00000072062,ENSG00000075223,ENSG00000075711,ENSG00000082196,ENSG00000100271,ENSG00000100280,ENSG00000100592,ENSG00000100852,ENSG00000101846,ENSG00000104133,ENSG00000105738,ENSG00000105855,ENSG00000106078,ENSG00000107263…	THSD7A,ETV1,SCIN,GAS7,CDKL5,CYP24A1,SEC63,DSG2,HDAC9,PIK3CB,RPS6KA2,PRKACA,SEMA3C,DLG1,C1QTNF3,TTLL1,AP1B1,DAAM1,ARHGAP5,STS,SPG11,SIPA1L3,ITGB8,COBL,RAPGEF1,UNC5B,LIPA,LZTS2,ZMIZ1,RAI1,PRKAR1A,BIRC2,TRPV4,ARHGDIB,VDR,SUDS3,GCNT2,COL4A3BP,BCL6,SNX17,EFEMP1,RAB3GAP1,DHCR24,RHOU,LEPR,ETV3,KDM5B,TJP2,RAB14,CSF3R,IRF2BPL,HOXB5,KIAA1217,PLS1,APAF1,TRIM6,PIK3CA,NCOA3,VAMP7,BBS2,HIVEP3,MACF1,MLLT4,CLIP1…
GO:0009914	0.0166086	1.97877	7.3642	14	298	hormone transport	0.154346	ENSG00000082196,ENSG00000089163,ENSG00000111199,ENSG00000124333,ENSG00000132326,ENSG00000137486,ENSG00000155093,ENSG00000156675,ENSG00000166263,ENSG00000170745,ENSG00000171132,ENSG00000172071,ENSG00000182782,ENSG00000274286	C1QTNF3,SIRT4,TRPV4,VAMP7,PER2,ARRB1,PTPRN2,RAB11FIP1,STXBP4,KCNS3,PRKCE,EIF2AK3,HCAR2,ADRA2B
GO:0051057	0.0166595	4.4183	0.988484	4	40	positive regulation of small GTPase mediated signal transduction	0.154509	ENSG00000100485,ENSG00000137486,ENSG00000170776,ENSG00000198915	SOS2,ARRB1,AKAP13,RASGEF1A
GO:1902533	0.0167492	1.54586	21.5489	32	872	positive regulation of intracellular signal transduction	0.15503	ENSG00000051382,ENSG00000080561,ENSG00000088888,ENSG00000100485,ENSG00000102471,ENSG00000107263,ENSG00000107731,ENSG00000110330,ENSG00000111199,ENSG00000111846,ENSG00000128284,ENSG00000129353,ENSG00000131653,ENSG00000132356,ENSG00000134313,ENSG00000135090,ENSG00000136158,ENSG00000137486,ENSG00000138193,ENSG00000139946,ENSG00000141503,ENSG00000141736,ENSG00000146674,ENSG00000157625,ENSG00000158092…	PIK3CB,MID2,MAVS,SOS2,NDFIP2,RAPGEF1,UNC5B,BIRC2,TRPV4,GCNT2,APOL3,SLC44A2,TRAF7,PRKAA1,KIDINS220,TAOK3,SPRY2,ARRB1,PLCE1,PELI2,MINK1,ERBB2,IGFBP3,TAB3,NCK1,ALOX15,AKAP13,PRKCE,MAP3K5,RASGEF1A,TGM2,ADRA2B
GO:0009605	0.017111	1.36389	49.3253	64	1996	response to external stimulus	0.158063	ENSG00000001561,ENSG00000004799,ENSG00000005882,ENSG00000006468,ENSG00000011021,ENSG00000019186,ENSG00000051382,ENSG00000064201,ENSG00000075223,ENSG00000082196,ENSG00000088888,ENSG00000091317,ENSG00000100280,ENSG00000100330,ENSG00000102580,ENSG00000106299,ENSG00000107731,ENSG00000107862,ENSG00000110324,ENSG00000110330,ENSG00000111199,ENSG00000111424,ENSG00000112851,ENSG00000113916,ENSG00000114698…	ENPP4,PDK4,PDK2,ETV1,CLCN6,CYP24A1,PIK3CB,TSPAN32,SEMA3C,C1QTNF3,MAVS,CMTM6,AP1B1,MTMR3,DNAJC3,WASL,UNC5B,GBF1,IL10RA,BIRC2,TRPV4,VDR,ERBB2IP,BCL6,PLSCR4,IL1R1,MUC5B,RAB14,CSF3R,APAF1,TRIM6,VAMP7,BBS2,SEC14L1,LDLR,PRKAA1,PIK3C2B,ARRB1,PPM1B,BMPR1B,BBS4,ERBB2,FOXO1,FER,CXADR,NCK1,ABR,ITGB2,TSC1,TC2N,AP1G1,MECP2,CD14,PRKCE,EIF2AK3,PTPRM,SPTBN2,PACS1,RPS6KA3,BCR,PPARA,KANK2,SREBF2,TGM2
GO:0032990	0.0172254	1.56492	19.9427	30	807	cell part morphogenesis	0.158803	ENSG00000006468,ENSG00000008086,ENSG00000075223,ENSG00000100271,ENSG00000104133,ENSG00000106078,ENSG00000107731,ENSG00000113163,ENSG00000124333,ENSG00000125124,ENSG00000127603,ENSG00000133961,ENSG00000134313,ENSG00000136854,ENSG00000138002,ENSG00000138696,ENSG00000140463,ENSG00000141298,ENSG00000141503,ENSG00000141736,ENSG00000158195,ENSG00000163110,ENSG00000171100,ENSG00000173482,ENSG00000173898…	ETV1,CDKL5,SEMA3C,TTLL1,SPG11,COBL,UNC5B,COL4A3BP,VAMP7,BBS2,MACF1,NUMB,KIDINS220,STXBP1,IFT172,BMPR1B,BBS4,SSH2,MINK1,ERBB2,WASF2,PDLIM5,MTM1,PTPRM,SPTBN2,SEPT9,ITSN2,ATL1,FMN1,CYFIP1
GO:0001501	0.0174072	1.74075	11.9359	20	483	skeletal system development	0.160038	ENSG00000006747,ENSG00000075711,ENSG00000105855,ENSG00000108557,ENSG00000111424,ENSG00000115380,ENSG00000120075,ENSG00000120549,ENSG00000125124,ENSG00000138002,ENSG00000138696,ENSG00000138801,ENSG00000150867,ENSG00000158195,ENSG00000170776,ENSG00000172071,ENSG00000177189,ENSG00000182158,ENSG00000184634,ENSG00000248905	SCIN,DLG1,ITGB8,RAI1,VDR,EFEMP1,HOXB5,KIAA1217,BBS2,IFT172,BMPR1B,PAPSS1,PIP4K2A,WASF2,AKAP13,EIF2AK3,RPS6KA3,CREB3L2,MED12,FMN1
GO:0031667	0.0174285	1.83309	9.63772	17	390	response to nutrient levels	0.160038	ENSG00000004799,ENSG00000005882,ENSG00000019186,ENSG00000100330,ENSG00000111199,ENSG00000111424,ENSG00000120868,ENSG00000125124,ENSG00000132356,ENSG00000133056,ENSG00000140463,ENSG00000150907,ENSG00000165699,ENSG00000172071,ENSG00000186951,ENSG00000197256,ENSG00000198911	PDK4,PDK2,CYP24A1,MTMR3,TRPV4,VDR,APAF1,BBS2,PRKAA1,PIK3C2B,BBS4,FOXO1,TSC1,EIF2AK3,PPARA,KANK2,SREBF2
GO:1903828	0.0175275	2.55604	3.28671	8	133	negative regulation of cellular protein localization	0.160628	ENSG00000068912,ENSG00000082196,ENSG00000089163,ENSG00000107816,ENSG00000127334,ENSG00000133961,ENSG00000138032,ENSG00000264522	ERLEC1,C1QTNF3,SIRT4,LZTS2,DYRK2,NUMB,PPM1B,OTUD7B
GO:0071333	0.01768	2.76526	2.66891	7	108	cellular response to glucose stimulus	0.161706	ENSG00000072062,ENSG00000121879,ENSG00000137486,ENSG00000155093,ENSG00000166263,ENSG00000171132,ENSG00000198722	PRKACA,PIK3CA,ARRB1,PTPRN2,STXBP4,PRKCE,UNC13B
GO:2000113	0.0178331	1.44324	31.8292	44	1288	negative regulation of cellular macromolecule biosynthetic process	0.162784	ENSG00000048052,ENSG00000052795,ENSG00000075711,ENSG00000076108,ENSG00000078687,ENSG00000089163,ENSG00000092330,ENSG00000111199,ENSG00000111424,ENSG00000111707,ENSG00000111727,ENSG00000113916,ENSG00000117036,ENSG00000117139,ENSG00000117625,ENSG00000119669,ENSG00000121236,ENSG00000132326,ENSG00000136169,ENSG00000136231,ENSG00000144791,ENSG00000150907,ENSG00000151090,ENSG00000153814,ENSG00000158092…	HDAC9,FNIP2,DLG1,BAZ2A,TNRC6C,SIRT4,TINF2,TRPV4,VDR,SUDS3,HCFC2,BCL6,ETV3,KDM5B,RCOR3,IRF2BPL,TRIM6,PER2,SETDB2,IGF2BP3,LIMD1,FOXO1,THRB,JAZF1,NCK1,CITED2,ZHX1,TSC1,HIF1AN,IRF2,MECP2,ZNF217,EIF2AK3,PHF8,NR2F1,ZFP90,PPARA,MPHOSPH8,DAPK1,STRN3,KANK2,SREBF2,LGR4,OTUD7B
GO:0070482	0.0179508	1.95772	7.43834	14	301	response to oxygen levels	0.163536	ENSG00000089163,ENSG00000110330,ENSG00000120868,ENSG00000132356,ENSG00000144791,ENSG00000149428,ENSG00000150907,ENSG00000164442,ENSG00000165699,ENSG00000166135,ENSG00000169057,ENSG00000171132,ENSG00000173376,ENSG00000186951	SIRT4,BIRC2,APAF1,PRKAA1,LIMD1,HYOU1,FOXO1,CITED2,TSC1,HIF1AN,MECP2,PRKCE,NDNF,PPARA
GO:0001974	0.0181101	4.29862	1.0132	4	41	blood vessel remodeling	0.16434	ENSG00000075223,ENSG00000159842,ENSG00000186716,ENSG00000198959	SEMA3C,ABR,BCR,TGM2
GO:0009409	0.0181101	4.29862	1.0132	4	41	response to cold	0.16434	ENSG00000102580,ENSG00000132356,ENSG00000150907,ENSG00000172071	DNAJC3,PRKAA1,FOXO1,EIF2AK3
GO:0002695	0.0182536	2.5356	3.31142	8	134	negative regulation of leukocyte activation	0.164689	ENSG00000064201,ENSG00000075711,ENSG00000108946,ENSG00000113916,ENSG00000141736,ENSG00000151422,ENSG00000159842,ENSG00000186716	TSPAN32,DLG1,PRKAR1A,BCL6,ERBB2,FER,ABR,BCR
GO:0043524	0.0182536	2.5356	3.31142	8	134	negative regulation of neuron apoptotic process	0.164689	ENSG00000107731,ENSG00000121879,ENSG00000135472,ENSG00000136854,ENSG00000145715,ENSG00000149428,ENSG00000169057,ENSG00000173376	UNC5B,PIK3CA,FAIM2,STXBP1,RASA1,HYOU1,MECP2,NDNF
GO:0044767	0.0182553	1.24757	138.536	159	5606	single-organism developmental process	0.164689	ENSG00000005108,ENSG00000006468,ENSG00000006747,ENSG00000007237,ENSG00000008086,ENSG00000019186,ENSG00000025796,ENSG00000046604,ENSG00000048052,ENSG00000051382,ENSG00000071242,ENSG00000072062,ENSG00000075223,ENSG00000075711,ENSG00000082196,ENSG00000100271,ENSG00000100280,ENSG00000100592,ENSG00000100852,ENSG00000104133,ENSG00000105738,ENSG00000105855,ENSG00000106078,ENSG00000107263,ENSG00000107731…	THSD7A,ETV1,SCIN,GAS7,CDKL5,CYP24A1,SEC63,DSG2,HDAC9,PIK3CB,RPS6KA2,PRKACA,SEMA3C,DLG1,C1QTNF3,TTLL1,AP1B1,DAAM1,ARHGAP5,SPG11,SIPA1L3,ITGB8,COBL,RAPGEF1,UNC5B,LIPA,LZTS2,ZMIZ1,RAI1,PRKAR1A,BIRC2,TRPV4,ARHGDIB,VDR,SUDS3,GCNT2,COL4A3BP,BCL6,SNX17,EFEMP1,RAB3GAP1,DHCR24,RHOU,LEPR,ETV3,KDM5B,TJP2,RAB14,CSF3R,HOXB5,KIAA1217,PLS1,APAF1,TRIM6,PIK3CA,NCOA3,VAMP7,BBS2,HIVEP3,MACF1,MLLT4,CLIP1,PER2,PRKAA1…
GO:2000209	0.0183838	5.95599	0.568378	3	23	regulation of anoikis	0.165336	ENSG00000004799,ENSG00000118454,ENSG00000121879	PDK4,ANKRD13C,PIK3CA
GO:0032272	0.0183985	3.49218	1.53215	5	62	negative regulation of protein polymerization	0.165336	ENSG00000006747,ENSG00000138594,ENSG00000140463,ENSG00000151491,ENSG00000173898	SCIN,TMOD3,BBS4,EPS8,SPTBN2
GO:0051094	0.018493	1.46476	28.4683	40	1152	positive regulation of developmental process	0.165864	ENSG00000006747,ENSG00000008086,ENSG00000048052,ENSG00000106078,ENSG00000107263,ENSG00000111424,ENSG00000111846,ENSG00000113916,ENSG00000117139,ENSG00000120756,ENSG00000124151,ENSG00000124333,ENSG00000125124,ENSG00000127603,ENSG00000130779,ENSG00000132356,ENSG00000133961,ENSG00000134313,ENSG00000138696,ENSG00000140463,ENSG00000145868,ENSG00000146674,ENSG00000150760,ENSG00000158092,ENSG00000160255…	SCIN,CDKL5,HDAC9,COBL,RAPGEF1,VDR,GCNT2,BCL6,KDM5B,PLS1,NCOA3,VAMP7,BBS2,MACF1,CLIP1,PRKAA1,NUMB,KIDINS220,BMPR1B,BBS4,FBXO38,IGFBP3,DOCK1,NCK1,ITGB2,JAK1,SPRY1,CITED2,HIF1AN,MECP2,MTM1,NDNF,RPS6KA3,NCMAP,SEPT9,BCL9L,MAP3K5,ITSN2,LGR4,ADRA2B
GO:0043467	0.0186837	3.02694	2.10053	6	85	regulation of generation of precursor metabolites and energy	0.166927	ENSG00000111199,ENSG00000121879,ENSG00000127334,ENSG00000132356,ENSG00000173281,ENSG00000186951	TRPV4,PIK3CA,DYRK2,PRKAA1,PPP1R3B,PPARA
GO:1901184	0.0186837	3.02694	2.10053	6	85	regulation of ERBB signaling pathway	0.166927	ENSG00000085832,ENSG00000115145,ENSG00000136158,ENSG00000151422,ENSG00000164056,ENSG00000274286	EPS15,STAM2,SPRY2,FER,SPRY1,ADRA2B
GO:0032886	0.019001	2.51548	3.33613	8	135	regulation of microtubule-based process	0.168486	ENSG00000111199,ENSG00000115561,ENSG00000119541,ENSG00000125124,ENSG00000127603,ENSG00000130779,ENSG00000140463,ENSG00000141736	TRPV4,CHMP3,VPS4B,BBS2,MACF1,CLIP1,BBS4,ERBB2
GO:0043903	0.0191056	1.99721	6.77111	13	274	regulation of symbiosis, encompassing mutualism through parasitism	0.168486	ENSG00000064201,ENSG00000080561,ENSG00000088888,ENSG00000100280,ENSG00000110330,ENSG00000115561,ENSG00000119541,ENSG00000121236,ENSG00000129657,ENSG00000138032,ENSG00000166747,ENSG00000175115,ENSG00000185591	TSPAN32,MID2,MAVS,AP1B1,BIRC2,CHMP3,VPS4B,TRIM6,SEC14L1,PPM1B,AP1G1,PACS1,SP1
GO:0016051	0.0192962	2.23478	4.67059	10	189	carbohydrate biosynthetic process	0.168486	ENSG00000005882,ENSG00000082196,ENSG00000114166,ENSG00000115840,ENSG00000116678,ENSG00000127334,ENSG00000132326,ENSG00000150907,ENSG00000173281,ENSG00000186951	PDK2,C1QTNF3,KAT2B,SLC25A12,LEPR,DYRK2,PER2,FOXO1,PPP1R3B,PPARA
GO:0016358	0.0192962	2.23478	4.67059	10	189	dendrite development	0.168486	ENSG00000008086,ENSG00000106078,ENSG00000124333,ENSG00000130779,ENSG00000134313,ENSG00000140463,ENSG00000141503,ENSG00000163110,ENSG00000169057,ENSG00000248905	CDKL5,COBL,VAMP7,CLIP1,KIDINS220,BBS4,MINK1,PDLIM5,MECP2,FMN1
GO:0044085	0.0193508	1.30779	68.7243	85	2781	cellular component biogenesis	0.168486	ENSG00000006747,ENSG00000052795,ENSG00000072062,ENSG00000073969,ENSG00000075711,ENSG00000082196,ENSG00000085832,ENSG00000092330,ENSG00000100271,ENSG00000100330,ENSG00000106078,ENSG00000106299,ENSG00000107263,ENSG00000107816,ENSG00000108239,ENSG00000108946,ENSG00000110330,ENSG00000111199,ENSG00000113282,ENSG00000113615,ENSG00000114316,ENSG00000115145,ENSG00000115561,ENSG00000115839,ENSG00000119396…	SCIN,FNIP2,PRKACA,NSF,DLG1,C1QTNF3,EPS15,TINF2,TTLL1,MTMR3,COBL,WASL,RAPGEF1,LZTS2,TBC1D12,PRKAR1A,BIRC2,TRPV4,CLINT1,SEC24A,USP4,STAM2,CHMP3,RAB3GAP1,RAB14,VPS4B,PLS1,APAF1,TRIM6,VAMP7,BBS2,MACF1,CLIP1,PRKAA1,FLOT2,KCTD3,STXBP1,ARRB1,IFT172,TMOD3,FGD4,LNX2,FBLN5,BBS4,SSH2,LIMD1,RASA1,PIP4K2A,MAGI1,FER,EPS8,MARVELD2,SLC7A7,NCK1,WASF2,CUL4B,SYNJ1,VPS11,ALOX15,PDLIM5,ARFIP1,TSC1,MECP2,TMED10,KCNS3,…
GO:0006930	0.0195499	11.3261	0.222409	2	9	substrate-dependent cell migration, cell extension	0.168486	ENSG00000158092,ENSG00000198087	NCK1,CD2AP
GO:0015871	0.0195499	11.3261	0.222409	2	9	choline transport	0.168486	ENSG00000129353,ENSG00000129657	SLC44A2,SEC14L1
GO:0035542	0.0195499	11.3261	0.222409	2	9	regulation of SNARE complex assembly	0.168486	ENSG00000136854,ENSG00000160695	STXBP1,VPS11
GO:0043379	0.0195499	11.3261	0.222409	2	9	memory T cell differentiation	0.168486	ENSG00000113916,ENSG00000165699	BCL6,TSC1
GO:0045792	0.0195499	11.3261	0.222409	2	9	negative regulation of cell size	0.168486	ENSG00000155792,ENSG00000165699	DEPTOR,TSC1
GO:0048194	0.0195499	11.3261	0.222409	2	9	Golgi vesicle budding	0.168486	ENSG00000107862,ENSG00000170348	GBF1,TMED10
GO:0060312	0.0195499	11.3261	0.222409	2	9	regulation of blood vessel remodeling	0.168486	ENSG00000159842,ENSG00000186716	ABR,BCR
GO:0060340	0.0195499	11.3261	0.222409	2	9	positive regulation of type I interferon-mediated signaling pathway	0.168486	ENSG00000088888,ENSG00000121236	MAVS,TRIM6
GO:0070424	0.0195499	11.3261	0.222409	2	9	regulation of nucleotide-binding oligomerization domain containing signaling pathway	0.168486	ENSG00000110330,ENSG00000112851	BIRC2,ERBB2IP
GO:0099515	0.0195499	11.3261	0.222409	2	9	actin filament-based transport	0.168486	ENSG00000100242,ENSG00000106299	SUN2,WASL
GO:1900102	0.0195499	11.3261	0.222409	2	9	negative regulation of endoplasmic reticulum unfolded protein response	0.168486	ENSG00000103429,ENSG00000158092	BFAR,NCK1
GO:1902855	0.0195499	11.3261	0.222409	2	9	regulation of nonmotile primary cilium assembly	0.168486	ENSG00000140463,ENSG00000184640	BBS4,SEPT9
GO:1903044	0.0195499	11.3261	0.222409	2	9	protein localization to membrane raft	0.168486	ENSG00000130779,ENSG00000132589	CLIP1,FLOT2
GO:2000786	0.0195499	11.3261	0.222409	2	9	positive regulation of autophagosome assembly	0.168486	ENSG00000115839,ENSG00000150867	RAB3GAP1,PIP4K2A
GO:0002218	0.0196446	2.05462	6.07917	12	246	activation of innate immune response	0.168674	ENSG00000072062,ENSG00000088888,ENSG00000110330,ENSG00000112851,ENSG00000129657,ENSG00000142875,ENSG00000157625,ENSG00000160255,ENSG00000170458,ENSG00000171132,ENSG00000177189,ENSG00000205213	PRKACA,MAVS,BIRC2,ERBB2IP,SEC14L1,PRKACB,TAB3,ITGB2,CD14,PRKCE,RPS6KA3,LGR4
GO:0034330	0.0196446	2.05462	6.07917	12	246	cell junction organization	0.168674	ENSG00000046604,ENSG00000072062,ENSG00000075711,ENSG00000107263,ENSG00000111199,ENSG00000127603,ENSG00000130396,ENSG00000133961,ENSG00000152939,ENSG00000154639,ENSG00000165699,ENSG00000248905	DSG2,PRKACA,DLG1,RAPGEF1,TRPV4,MACF1,MLLT4,NUMB,MARVELD2,CXADR,TSC1,FMN1
GO:0045860	0.0197945	1.74233	11.3181	19	458	positive regulation of protein kinase activity	0.169647	ENSG00000051382,ENSG00000072062,ENSG00000075711,ENSG00000107263,ENSG00000108946,ENSG00000121879,ENSG00000131653,ENSG00000132356,ENSG00000134313,ENSG00000135090,ENSG00000136158,ENSG00000137486,ENSG00000138193,ENSG00000141736,ENSG00000142875,ENSG00000157625,ENSG00000170776,ENSG00000197442,ENSG00000274286	PIK3CB,PRKACA,DLG1,RAPGEF1,PRKAR1A,PIK3CA,TRAF7,PRKAA1,KIDINS220,TAOK3,SPRY2,ARRB1,PLCE1,ERBB2,PRKACB,TAB3,AKAP13,MAP3K5,ADRA2B
GO:0001932	0.0198399	1.43786	31.1867	43	1262	regulation of protein phosphorylation	0.169721	ENSG00000051382,ENSG00000052795,ENSG00000072062,ENSG00000075711,ENSG00000077232,ENSG00000088888,ENSG00000102580,ENSG00000107263,ENSG00000108946,ENSG00000111199,ENSG00000111846,ENSG00000114166,ENSG00000121236,ENSG00000121879,ENSG00000131653,ENSG00000132356,ENSG00000134313,ENSG00000135090,ENSG00000136158,ENSG00000137486,ENSG00000138193,ENSG00000139946,ENSG00000141503,ENSG00000141736,ENSG00000142875…	PIK3CB,FNIP2,PRKACA,DLG1,DNAJC10,MAVS,DNAJC3,RAPGEF1,PRKAR1A,TRPV4,GCNT2,KAT2B,TRIM6,PIK3CA,TRAF7,PRKAA1,KIDINS220,TAOK3,SPRY2,ARRB1,PLCE1,PELI2,MINK1,ERBB2,PRKACB,IGFBP3,FOXO1,FER,CNKSR3,DEPTOR,TAB3,NCK1,ITGB2,ALOX15,SPRY1,TSC1,AKAP13,PRKCE,EIF2AK3,SMYD3,NBR1,MAP3K5,ADRA2B
GO:0030100	0.0199377	2.22222	4.6953	10	190	regulation of endocytosis	0.170096	ENSG00000051382,ENSG00000106299,ENSG00000108774,ENSG00000115234,ENSG00000137486,ENSG00000159842,ENSG00000161905,ENSG00000170458,ENSG00000186716,ENSG00000198087	PIK3CB,WASL,RAB5C,SNX17,ARRB1,ABR,ALOX15,CD14,BCR,CD2AP
GO:0045216	0.0199573	2.12733	5.38724	11	218	cell-cell junction organization	0.170096	ENSG00000046604,ENSG00000072062,ENSG00000075711,ENSG00000111199,ENSG00000127603,ENSG00000130396,ENSG00000133961,ENSG00000152939,ENSG00000154639,ENSG00000165699,ENSG00000248905	DSG2,PRKACA,DLG1,TRPV4,MACF1,MLLT4,NUMB,MARVELD2,CXADR,TSC1,FMN1
GO:0030154	0.0200813	1.27839	87.4067	105	3537	cell differentiation	0.170839	ENSG00000005108,ENSG00000006468,ENSG00000006747,ENSG00000007237,ENSG00000008086,ENSG00000019186,ENSG00000048052,ENSG00000071242,ENSG00000072062,ENSG00000075223,ENSG00000082196,ENSG00000104133,ENSG00000105738,ENSG00000106078,ENSG00000107263,ENSG00000107731,ENSG00000108175,ENSG00000108946,ENSG00000110330,ENSG00000111199,ENSG00000111424,ENSG00000111846,ENSG00000113916,ENSG00000115380,ENSG00000116678…	THSD7A,ETV1,SCIN,GAS7,CDKL5,CYP24A1,HDAC9,RPS6KA2,PRKACA,SEMA3C,C1QTNF3,SPG11,SIPA1L3,COBL,RAPGEF1,UNC5B,ZMIZ1,PRKAR1A,BIRC2,TRPV4,VDR,GCNT2,BCL6,EFEMP1,LEPR,ETV3,KDM5B,TJP2,CSF3R,HOXB5,APAF1,TRIM6,NCOA3,VAMP7,BBS2,HIVEP3,MACF1,MLLT4,CLIP1,PER2,FLOT2,NUMB,KIDINS220,FAIM2,SPRY2,STXBP1,IFT172,TMOD3,BMPR1B,BBS4,SSH2,MINK1,ERBB2,LIMD1,RASA1,FBXO38,IGFBP3,ST14,DOCK1,PIP4K2A,FOXO1,THRB,FER,IGSF10,MARVE…
GO:1901617	0.0201433	2.33563	4.02807	9	163	organic hydroxy compound biosynthetic process	0.171051	ENSG00000001630,ENSG00000067064,ENSG00000104549,ENSG00000111424,ENSG00000116133,ENSG00000132196,ENSG00000132356,ENSG00000160285,ENSG00000161905	CYP51A1,IDI1,SQLE,VDR,DHCR24,HSD17B7,PRKAA1,LSS,ALOX15
GO:0071326	0.0202405	2.685	2.74304	7	111	cellular response to monosaccharide stimulus	0.171249	ENSG00000072062,ENSG00000121879,ENSG00000137486,ENSG00000155093,ENSG00000166263,ENSG00000171132,ENSG00000198722	PRKACA,PIK3CA,ARRB1,PTPRN2,STXBP4,PRKCE,UNC13B
GO:0071331	0.0202405	2.685	2.74304	7	111	cellular response to hexose stimulus	0.171249	ENSG00000072062,ENSG00000121879,ENSG00000137486,ENSG00000155093,ENSG00000166263,ENSG00000171132,ENSG00000198722	PRKACA,PIK3CA,ARRB1,PTPRN2,STXBP4,PRKCE,UNC13B
GO:0009967	0.0204936	1.41783	33.8556	46	1370	positive regulation of signal transduction	0.172054	ENSG00000051382,ENSG00000080561,ENSG00000088888,ENSG00000100485,ENSG00000102471,ENSG00000106069,ENSG00000107263,ENSG00000107731,ENSG00000110330,ENSG00000111199,ENSG00000111846,ENSG00000115594,ENSG00000120868,ENSG00000121236,ENSG00000127603,ENSG00000128284,ENSG00000129353,ENSG00000131653,ENSG00000132356,ENSG00000134313,ENSG00000135090,ENSG00000136158,ENSG00000137486,ENSG00000138002,ENSG00000138193…	PIK3CB,MID2,MAVS,SOS2,NDFIP2,CHN2,RAPGEF1,UNC5B,BIRC2,TRPV4,GCNT2,IL1R1,APAF1,TRIM6,MACF1,APOL3,SLC44A2,TRAF7,PRKAA1,KIDINS220,TAOK3,SPRY2,ARRB1,IFT172,PLCE1,BMPR1B,PELI2,MINK1,ERBB2,IGFBP3,EPS8,DISP1,TAB3,NCK1,ALOX15,CITED2,AKAP13,PRKCE,MAP3K5,ITSN2,UNC13B,RASGEF1A,TGM2,MBD5,LGR4,ADRA2B
GO:0031327	0.0205903	1.40738	35.6101	48	1441	negative regulation of cellular biosynthetic process	0.172054	ENSG00000048052,ENSG00000052795,ENSG00000075711,ENSG00000076108,ENSG00000078687,ENSG00000080561,ENSG00000082196,ENSG00000089163,ENSG00000092330,ENSG00000111199,ENSG00000111424,ENSG00000111707,ENSG00000111727,ENSG00000113916,ENSG00000116678,ENSG00000117036,ENSG00000117139,ENSG00000117625,ENSG00000119669,ENSG00000121236,ENSG00000132326,ENSG00000132356,ENSG00000136169,ENSG00000136231,ENSG00000144791…	HDAC9,FNIP2,DLG1,BAZ2A,TNRC6C,MID2,C1QTNF3,SIRT4,TINF2,TRPV4,VDR,SUDS3,HCFC2,BCL6,LEPR,ETV3,KDM5B,RCOR3,IRF2BPL,TRIM6,PER2,PRKAA1,SETDB2,IGF2BP3,LIMD1,FOXO1,THRB,JAZF1,NCK1,CITED2,ZHX1,TSC1,HIF1AN,IRF2,MECP2,ZNF217,EIF2AK3,PHF8,NR2F1,ZFP90,PPARA,MPHOSPH8,DAPK1,STRN3,KANK2,SREBF2,LGR4,OTUD7B
GO:0006356	0.0206332	5.67202	0.59309	3	24	regulation of transcription from RNA polymerase I promoter	0.172054	ENSG00000141736,ENSG00000172071,ENSG00000172943	ERBB2,EIF2AK3,PHF8
GO:0006541	0.0206332	5.67202	0.59309	3	24	glutamine metabolic process	0.172054	ENSG00000089163,ENSG00000169057,ENSG00000198380	SIRT4,MECP2,GFPT1
GO:0032098	0.0206332	5.67202	0.59309	3	24	regulation of appetite	0.172054	ENSG00000125124,ENSG00000140463,ENSG00000186951	BBS2,BBS4,PPARA
GO:0032800	0.0206332	5.67202	0.59309	3	24	receptor biosynthetic process	0.172054	ENSG00000113615,ENSG00000118454,ENSG00000186951	SEC24A,ANKRD13C,PPARA
GO:0046856	0.0206332	5.67202	0.59309	3	24	phosphatidylinositol dephosphorylation	0.172054	ENSG00000100330,ENSG00000159082,ENSG00000171100	MTMR3,SYNJ1,MTM1
GO:2000300	0.0206332	5.67202	0.59309	3	24	regulation of synaptic vesicle exocytosis	0.172054	ENSG00000115839,ENSG00000136854,ENSG00000198722	RAB3GAP1,STXBP1,UNC13B
GO:0016570	0.0207465	1.76172	10.6015	18	429	histone modification	0.172507	ENSG00000048052,ENSG00000055609,ENSG00000076108,ENSG00000107077,ENSG00000111707,ENSG00000113916,ENSG00000114166,ENSG00000117139,ENSG00000124151,ENSG00000132326,ENSG00000132356,ENSG00000136169,ENSG00000137486,ENSG00000158290,ENSG00000169057,ENSG00000172943,ENSG00000173011,ENSG00000185420	HDAC9,KMT2C,BAZ2A,KDM4C,SUDS3,BCL6,KAT2B,KDM5B,NCOA3,PER2,PRKAA1,SETDB2,ARRB1,CUL4B,MECP2,PHF8,TADA2B,SMYD3
GO:0044057	0.020762	1.70659	12.1583	20	492	regulation of system process	0.172507	ENSG00000046604,ENSG00000072062,ENSG00000077157,ENSG00000082196,ENSG00000108389,ENSG00000132326,ENSG00000138193,ENSG00000151090,ENSG00000154639,ENSG00000156675,ENSG00000165895,ENSG00000168710,ENSG00000169057,ENSG00000170776,ENSG00000172071,ENSG00000173482,ENSG00000182782,ENSG00000184454,ENSG00000198363,ENSG00000274286	DSG2,PRKACA,PPP1R12B,C1QTNF3,MTMR4,PER2,PLCE1,THRB,CXADR,RAB11FIP1,ARHGAP42,AHCYL1,MECP2,AKAP13,EIF2AK3,PTPRM,HCAR2,NCMAP,ASPH,ADRA2B
GO:0043299	0.0208357	3.37338	1.58157	5	64	leukocyte degranulation	0.172809	ENSG00000124333,ENSG00000151422,ENSG00000159842,ENSG00000166747,ENSG00000186716	VAMP7,FER,ABR,AP1G1,BCR
GO:1903307	0.0212406	4.07768	1.06262	4	43	positive regulation of regulated secretory pathway	0.175852	ENSG00000124333,ENSG00000136854,ENSG00000166747,ENSG00000198722	VAMP7,STXBP1,AP1G1,UNC13B
GO:0007275	0.0216579	1.24902	117.036	136	4736	multicellular organism development	0.176221	ENSG00000005108,ENSG00000006468,ENSG00000006747,ENSG00000007237,ENSG00000008086,ENSG00000025796,ENSG00000046604,ENSG00000048052,ENSG00000051382,ENSG00000071242,ENSG00000072062,ENSG00000075223,ENSG00000075711,ENSG00000100280,ENSG00000100592,ENSG00000100852,ENSG00000104133,ENSG00000105738,ENSG00000105855,ENSG00000106078,ENSG00000107263,ENSG00000107731,ENSG00000107798,ENSG00000107816,ENSG00000108175…	THSD7A,ETV1,SCIN,GAS7,CDKL5,SEC63,DSG2,HDAC9,PIK3CB,RPS6KA2,PRKACA,SEMA3C,DLG1,AP1B1,DAAM1,ARHGAP5,SPG11,SIPA1L3,ITGB8,COBL,RAPGEF1,UNC5B,LIPA,LZTS2,ZMIZ1,RAI1,PRKAR1A,BIRC2,TRPV4,ARHGDIB,VDR,SUDS3,GCNT2,COL4A3BP,BCL6,SNX17,EFEMP1,RAB3GAP1,DHCR24,LEPR,KDM5B,RAB14,CSF3R,HOXB5,KIAA1217,APAF1,PIK3CA,NCOA3,VAMP7,BBS2,HIVEP3,MACF1,CLIP1,PER2,PRKAA1,NUMB,KIDINS220,FAIM2,SPRY2,SETDB2,RAPGEF5,STXBP1,ARRB…
GO:0033138	0.0217838	2.91566	2.17466	6	88	positive regulation of peptidyl-serine phosphorylation	0.176221	ENSG00000052795,ENSG00000121236,ENSG00000121879,ENSG00000136158,ENSG00000137486,ENSG00000185420	FNIP2,TRIM6,PIK3CA,SPRY2,ARRB1,SMYD3
GO:0010976	0.0218229	2.09654	5.46137	11	221	positive regulation of neuron projection development	0.176221	ENSG00000008086,ENSG00000106078,ENSG00000107263,ENSG00000124333,ENSG00000127603,ENSG00000130779,ENSG00000134313,ENSG00000145868,ENSG00000158092,ENSG00000173376,ENSG00000198399	CDKL5,COBL,RAPGEF1,VAMP7,MACF1,CLIP1,KIDINS220,FBXO38,NCK1,NDNF,ITSN2
GO:1901214	0.0219601	2.01958	6.17802	12	250	regulation of neuron death	0.176221	ENSG00000107731,ENSG00000116133,ENSG00000121879,ENSG00000135472,ENSG00000136854,ENSG00000145715,ENSG00000149428,ENSG00000165699,ENSG00000169057,ENSG00000173376,ENSG00000186951,ENSG00000197442	UNC5B,DHCR24,PIK3CA,FAIM2,STXBP1,RASA1,HYOU1,TSC1,MECP2,NDNF,PPARA,MAP3K5
GO:0009267	0.0220846	2.63401	2.79247	7	113	cellular response to starvation	0.176221	ENSG00000004799,ENSG00000100330,ENSG00000132356,ENSG00000133056,ENSG00000150907,ENSG00000172071,ENSG00000198911	PDK4,MTMR3,PRKAA1,PIK3C2B,FOXO1,EIF2AK3,SREBF2
GO:0010324	0.0221296	3.31695	1.60629	5	65	membrane invagination	0.176221	ENSG00000124333,ENSG00000144366,ENSG00000150760,ENSG00000161905,ENSG00000178996	VAMP7,GULP1,DOCK1,ALOX15,SNX18
GO:0034103	0.0221296	3.31695	1.60629	5	65	regulation of tissue remodeling	0.176221	ENSG00000004799,ENSG00000111424,ENSG00000116678,ENSG00000159842,ENSG00000186716	PDK4,VDR,LEPR,ABR,BCR
GO:0036294	0.0222099	2.43806	3.43498	8	139	cellular response to decreased oxygen levels	0.176221	ENSG00000089163,ENSG00000132356,ENSG00000149428,ENSG00000164442,ENSG00000165699,ENSG00000166135,ENSG00000171132,ENSG00000173376	SIRT4,PRKAA1,HYOU1,CITED2,TSC1,HIF1AN,PRKCE,NDNF
GO:0045892	0.0223833	1.45697	27.1339	38	1098	negative regulation of transcription, DNA-templated	0.176221	ENSG00000048052,ENSG00000052795,ENSG00000075711,ENSG00000076108,ENSG00000089163,ENSG00000111199,ENSG00000111424,ENSG00000111707,ENSG00000111727,ENSG00000113916,ENSG00000117036,ENSG00000117139,ENSG00000117625,ENSG00000119669,ENSG00000121236,ENSG00000132326,ENSG00000136169,ENSG00000144791,ENSG00000150907,ENSG00000151090,ENSG00000153814,ENSG00000158092,ENSG00000164442,ENSG00000165156,ENSG00000166135…	HDAC9,FNIP2,DLG1,BAZ2A,SIRT4,TRPV4,VDR,SUDS3,HCFC2,BCL6,ETV3,KDM5B,RCOR3,IRF2BPL,TRIM6,PER2,SETDB2,LIMD1,FOXO1,THRB,JAZF1,NCK1,CITED2,ZHX1,HIF1AN,IRF2,MECP2,ZNF217,PHF8,NR2F1,ZFP90,PPARA,MPHOSPH8,STRN3,KANK2,SREBF2,LGR4,OTUD7B
GO:0031399	0.0224441	1.37746	40.2066	53	1627	regulation of protein modification process	0.176221	ENSG00000051382,ENSG00000052795,ENSG00000072062,ENSG00000075711,ENSG00000077232,ENSG00000088888,ENSG00000092330,ENSG00000102471,ENSG00000102580,ENSG00000107263,ENSG00000108946,ENSG00000110330,ENSG00000111199,ENSG00000111846,ENSG00000113916,ENSG00000114166,ENSG00000114316,ENSG00000115839,ENSG00000121236,ENSG00000121879,ENSG00000131653,ENSG00000132326,ENSG00000132356,ENSG00000134313,ENSG00000135090…	PIK3CB,FNIP2,PRKACA,DLG1,DNAJC10,MAVS,TINF2,NDFIP2,DNAJC3,RAPGEF1,PRKAR1A,BIRC2,TRPV4,GCNT2,BCL6,KAT2B,USP4,RAB3GAP1,TRIM6,PIK3CA,TRAF7,PER2,PRKAA1,KIDINS220,TAOK3,SPRY2,ARRB1,PLCE1,PELI2,MINK1,ERBB2,PRKACB,IGFBP3,FOXO1,FER,CNKSR3,DEPTOR,TAB3,NCK1,ITGB2,ZER1,ALOX15,SPRY1,TSC1,MECP2,AKAP13,PRKCE,EIF2AK3,TADA2B,SMYD3,NBR1,MAP3K5,ADRA2B
GO:0002697	0.0224751	1.89712	7.66075	14	310	regulation of immune effector process	0.176221	ENSG00000064201,ENSG00000088888,ENSG00000100280,ENSG00000110330,ENSG00000113916,ENSG00000121236,ENSG00000124333,ENSG00000129657,ENSG00000138032,ENSG00000151422,ENSG00000159842,ENSG00000166747,ENSG00000175115,ENSG00000186716	TSPAN32,MAVS,AP1B1,BIRC2,BCL6,TRIM6,VAMP7,SEC14L1,PPM1B,FER,ABR,AP1G1,PACS1,BCR
GO:0050776	0.0229086	1.51452	21.2524	31	860	regulation of immune response	0.176221	ENSG00000026950,ENSG00000051382,ENSG00000072062,ENSG00000088888,ENSG00000106299,ENSG00000110330,ENSG00000112851,ENSG00000113916,ENSG00000121236,ENSG00000121879,ENSG00000124333,ENSG00000129657,ENSG00000142875,ENSG00000150760,ENSG00000151422,ENSG00000154639,ENSG00000157625,ENSG00000158092,ENSG00000158195,ENSG00000159842,ENSG00000160255,ENSG00000161905,ENSG00000162434,ENSG00000162896,ENSG00000166747…	BTN3A1,PIK3CB,PRKACA,MAVS,WASL,BIRC2,ERBB2IP,BCL6,TRIM6,PIK3CA,VAMP7,SEC14L1,PRKACB,DOCK1,FER,CXADR,TAB3,NCK1,WASF2,ABR,ITGB2,ALOX15,JAK1,PIGR,AP1G1,CD14,PRKCE,RPS6KA3,BCR,LGR4,CYFIP1
GO:0002446	0.0230267	5.41387	0.617802	3	25	neutrophil mediated immunity	0.176221	ENSG00000124333,ENSG00000159842,ENSG00000186716	VAMP7,ABR,BCR
GO:0051181	0.0230267	5.41387	0.617802	3	25	cofactor transport	0.176221	ENSG00000169359,ENSG00000181035,ENSG00000211584	SLC33A1,SLC25A42,SLC48A1
GO:0070076	0.0230267	5.41387	0.617802	3	25	histone lysine demethylation	0.176221	ENSG00000107077,ENSG00000117139,ENSG00000172943	KDM4C,KDM5B,PHF8
GO:0071295	0.0230267	5.41387	0.617802	3	25	cellular response to vitamin	0.176221	ENSG00000019186,ENSG00000111424,ENSG00000197256	CYP24A1,VDR,KANK2
GO:0080090	0.0230604	1.23466	140.414	160	5682	regulation of primary metabolic process	0.176221	ENSG00000004799,ENSG00000005882,ENSG00000006468,ENSG00000007237,ENSG00000048052,ENSG00000051382,ENSG00000052795,ENSG00000055609,ENSG00000068912,ENSG00000071242,ENSG00000072062,ENSG00000073969,ENSG00000075711,ENSG00000076108,ENSG00000077232,ENSG00000078687,ENSG00000080561,ENSG00000082196,ENSG00000084234,ENSG00000088888,ENSG00000089163,ENSG00000092330,ENSG00000100665,ENSG00000102471,ENSG00000102580…	PDK4,PDK2,ETV1,GAS7,HDAC9,PIK3CB,FNIP2,KMT2C,ERLEC1,RPS6KA2,PRKACA,NSF,DLG1,BAZ2A,DNAJC10,TNRC6C,MID2,C1QTNF3,APLP2,MAVS,SIRT4,TINF2,SERPINA4,NDFIP2,DNAJC3,LONP2,TAX1BP1,WASL,KDM4C,RGP1,RAPGEF1,ZMIZ1,RAI1,PRKAR1A,BIRC2,TRPV4,VDR,SUDS3,HCFC2,GCNT2,ERBB2IP,SEC24A,BCL6,KAT2B,USP4,EFEMP1,RAB3GAP1,DHCR24,LEPR,ETV3,KDM5B,PIK3R3,RCOR3,IRF2BPL,HOXB5,APAF1,TRIM6,PIK3CA,NCOA3,HIVEP3,DYRK2,LDLR,TRAF7,PER2,P…
GO:0009895	0.0230684	2.41944	3.45969	8	140	negative regulation of catabolic process	0.176221	ENSG00000068912,ENSG00000107185,ENSG00000132356,ENSG00000155313,ENSG00000171100,ENSG00000182782,ENSG00000186951,ENSG00000204463	ERLEC1,RGP1,PRKAA1,USP25,MTM1,HCAR2,PPARA,BAG6
GO:0007032	0.0234745	3.26238	1.631	5	66	endosome organization	0.176221	ENSG00000115145,ENSG00000115561,ENSG00000119541,ENSG00000159082,ENSG00000160695	STAM2,CHMP3,VPS4B,SYNJ1,VPS11
GO:0001956	0.0240424	9.90976	0.247121	2	10	positive regulation of neurotransmitter secretion	0.176221	ENSG00000115839,ENSG00000198722	RAB3GAP1,UNC13B
GO:0002887	0.0240424	9.90976	0.247121	2	10	negative regulation of myeloid leukocyte mediated immunity	0.176221	ENSG00000159842,ENSG00000186716	ABR,BCR
GO:0032509	0.0240424	9.90976	0.247121	2	10	endosome transport via multivesicular body sorting pathway	0.176221	ENSG00000115561,ENSG00000119541	CHMP3,VPS4B
GO:0040015	0.0240424	9.90976	0.247121	2	10	negative regulation of multicellular organism growth	0.176221	ENSG00000108557,ENSG00000125124	RAI1,BBS2
GO:0051639	0.0240424	9.90976	0.247121	2	10	actin filament network formation	0.176221	ENSG00000106078,ENSG00000120756	COBL,PLS1
GO:0071496	0.0244718	1.9857	6.27687	12	254	cellular response to external stimulus	0.176221	ENSG00000004799,ENSG00000005882,ENSG00000019186,ENSG00000100330,ENSG00000111424,ENSG00000132356,ENSG00000133056,ENSG00000150907,ENSG00000165699,ENSG00000172071,ENSG00000197256,ENSG00000198911	PDK4,PDK2,CYP24A1,MTMR3,VDR,PRKAA1,PIK3C2B,FOXO1,TSC1,EIF2AK3,KANK2,SREBF2
GO:0042059	0.024683	3.87829	1.11204	4	45	negative regulation of epidermal growth factor receptor signaling pathway	0.176221	ENSG00000085832,ENSG00000115145,ENSG00000136158,ENSG00000164056	EPS15,STAM2,SPRY2,SPRY1
GO:0002191	0.0247121	Inf	0.0247121	1	1	cap-dependent translational initiation	0.176221	ENSG00000158092	NCK1
GO:0005982	0.0247121	Inf	0.0247121	1	1	starch metabolic process	0.176221	ENSG00000257335	MGAM
GO:0005983	0.0247121	Inf	0.0247121	1	1	starch catabolic process	0.176221	ENSG00000257335	MGAM
GO:0006214	0.0247121	Inf	0.0247121	1	1	thymidine catabolic process	0.176221	ENSG00000188641	DPYD
GO:0007225	0.0247121	Inf	0.0247121	1	1	patched ligand maturation	0.176221	ENSG00000154309	DISP1
GO:0009646	0.0247121	Inf	0.0247121	1	1	response to absence of light	0.176221	ENSG00000164329	PAPD4
GO:0010808	0.0247121	Inf	0.0247121	1	1	positive regulation of synaptic vesicle priming	0.176221	ENSG00000198722	UNC13B
GO:0010836	0.0247121	Inf	0.0247121	1	1	negative regulation of protein ADP-ribosylation	0.176221	ENSG00000092330	TINF2
GO:0016191	0.0247121	Inf	0.0247121	1	1	synaptic vesicle uncoating	0.176221	ENSG00000159082	SYNJ1
GO:0033488	0.0247121	Inf	0.0247121	1	1	cholesterol biosynthetic process via 24,25-dihydrolanosterol	0.176221	ENSG00000001630	CYP51A1
GO:0034721	0.0247121	Inf	0.0247121	1	1	histone H3-K4 demethylation, trimethyl-H3-K4-specific	0.176221	ENSG00000117139	KDM5B
GO:0035638	0.0247121	Inf	0.0247121	1	1	signal maturation	0.176221	ENSG00000154309	DISP1
GO:0035938	0.0247121	Inf	0.0247121	1	1	estradiol secretion	0.176221	ENSG00000117139	KDM5B
GO:0036138	0.0247121	Inf	0.0247121	1	1	peptidyl-histidine hydroxylation	0.176221	ENSG00000166135	HIF1AN
GO:0036335	0.0247121	Inf	0.0247121	1	1	intestinal stem cell homeostasis	0.176221	ENSG00000205213	LGR4
GO:0036494	0.0247121	Inf	0.0247121	1	1	positive regulation of translation initiation in response to endoplasmic reticulum stress	0.176221	ENSG00000102580	DNAJC3
GO:0042264	0.0247121	Inf	0.0247121	1	1	peptidyl-aspartic acid hydroxylation	0.176221	ENSG00000166135	HIF1AN
GO:0042265	0.0247121	Inf	0.0247121	1	1	peptidyl-asparagine hydroxylation	0.176221	ENSG00000166135	HIF1AN
GO:0044028	0.0247121	Inf	0.0247121	1	1	DNA hypomethylation	0.176221	ENSG00000121879	PIK3CA
GO:0044029	0.0247121	Inf	0.0247121	1	1	hypomethylation of CpG island	0.176221	ENSG00000121879	PIK3CA
GO:0044395	0.0247121	Inf	0.0247121	1	1	protein targeting to vacuolar membrane	0.176221	ENSG00000124333	VAMP7
GO:0045175	0.0247121	Inf	0.0247121	1	1	basal protein localization	0.176221	ENSG00000112851	ERBB2IP
GO:0046127	0.0247121	Inf	0.0247121	1	1	pyrimidine deoxyribonucleoside catabolic process	0.176221	ENSG00000188641	DPYD
GO:0046317	0.0247121	Inf	0.0247121	1	1	regulation of glucosylceramide biosynthetic process	0.176221	ENSG00000132356	PRKAA1
GO:0046318	0.0247121	Inf	0.0247121	1	1	negative regulation of glucosylceramide biosynthetic process	0.176221	ENSG00000132356	PRKAA1
GO:0060232	0.0247121	Inf	0.0247121	1	1	delamination	0.176221	ENSG00000111199	TRPV4
GO:0061646	0.0247121	Inf	0.0247121	1	1	positive regulation of glutamate neurotransmitter secretion in response to membrane depolarization	0.176221	ENSG00000115839	RAB3GAP1
GO:0071484	0.0247121	Inf	0.0247121	1	1	cellular response to light intensity	0.176221	ENSG00000164329	PAPD4
GO:0071485	0.0247121	Inf	0.0247121	1	1	cellular response to absence of light	0.176221	ENSG00000164329	PAPD4
GO:0071612	0.0247121	Inf	0.0247121	1	1	IP-10 production	0.176221	ENSG00000088888	MAVS
GO:0071642	0.0247121	Inf	0.0247121	1	1	positive regulation of macrophage inflammatory protein 1 alpha production	0.176221	ENSG00000111199	TRPV4
GO:0071658	0.0247121	Inf	0.0247121	1	1	regulation of IP-10 production	0.176221	ENSG00000088888	MAVS
GO:0071660	0.0247121	Inf	0.0247121	1	1	positive regulation of IP-10 production	0.176221	ENSG00000088888	MAVS
GO:0072363	0.0247121	Inf	0.0247121	1	1	regulation of glycolytic process by positive regulation of transcription from RNA polymerase II promoter	0.176221	ENSG00000186951	PPARA
GO:0072366	0.0247121	Inf	0.0247121	1	1	regulation of cellular ketone metabolic process by positive regulation of transcription from RNA polymerase II promoter	0.176221	ENSG00000186951	PPARA
GO:0072414	0.0247121	Inf	0.0247121	1	1	response to mitotic cell cycle checkpoint signaling	0.176221	ENSG00000120868	APAF1
GO:0072432	0.0247121	Inf	0.0247121	1	1	response to G1 DNA damage checkpoint signaling	0.176221	ENSG00000120868	APAF1
GO:0090386	0.0247121	Inf	0.0247121	1	1	phagosome maturation involved in apoptotic cell clearance	0.176221	ENSG00000119396	RAB14
GO:0090387	0.0247121	Inf	0.0247121	1	1	phagolysosome assembly involved in apoptotic cell clearance	0.176221	ENSG00000119396	RAB14
GO:0097497	0.0247121	Inf	0.0247121	1	1	blood vessel endothelial cell delamination	0.176221	ENSG00000111199	TRPV4
GO:0100057	0.0247121	Inf	0.0247121	1	1	regulation of phenotypic switching by transcription from RNA polymerase II promoter	0.176221	ENSG00000185591	SP1
GO:1900483	0.0247121	Inf	0.0247121	1	1	regulation of protein targeting to vacuolar membrane	0.176221	ENSG00000124333	VAMP7
GO:1902442	0.0247121	Inf	0.0247121	1	1	regulation of ripoptosome assembly involved in necroptotic process	0.176221	ENSG00000110330	BIRC2
GO:1902443	0.0247121	Inf	0.0247121	1	1	negative regulation of ripoptosome assembly involved in necroptotic process	0.176221	ENSG00000110330	BIRC2
GO:1903294	0.0247121	Inf	0.0247121	1	1	regulation of glutamate secretion, neurotransmission	0.176221	ENSG00000115839	RAB3GAP1
GO:1903296	0.0247121	Inf	0.0247121	1	1	positive regulation of glutamate secretion, neurotransmission	0.176221	ENSG00000115839	RAB3GAP1
GO:1903420	0.0247121	Inf	0.0247121	1	1	protein localization to endoplasmic reticulum tubular network	0.176221	ENSG00000107862	GBF1
GO:1903444	0.0247121	Inf	0.0247121	1	1	negative regulation of brown fat cell differentiation	0.176221	ENSG00000111199	TRPV4
GO:1903542	0.0247121	Inf	0.0247121	1	1	negative regulation of exosomal secretion	0.176221	ENSG00000119541	VPS4B
GO:1903674	0.0247121	Inf	0.0247121	1	1	regulation of cap-dependent translational initiation	0.176221	ENSG00000158092	NCK1
GO:1903676	0.0247121	Inf	0.0247121	1	1	positive regulation of cap-dependent translational initiation	0.176221	ENSG00000158092	NCK1
GO:1903724	0.0247121	Inf	0.0247121	1	1	positive regulation of centriole elongation	0.176221	ENSG00000119541	VPS4B
GO:1903759	0.0247121	Inf	0.0247121	1	1	signal transduction involved in regulation of aerobic respiration	0.176221	ENSG00000111199	TRPV4
GO:1903905	0.0247121	Inf	0.0247121	1	1	positive regulation of establishment of T cell polarity	0.176221	ENSG00000132589	FLOT2
GO:1904182	0.0247121	Inf	0.0247121	1	1	regulation of pyruvate dehydrogenase activity	0.176221	ENSG00000089163	SIRT4
GO:1904826	0.0247121	Inf	0.0247121	1	1	regulation of hydrogen sulfide biosynthetic process	0.176221	ENSG00000185591	SP1
GO:1904828	0.0247121	Inf	0.0247121	1	1	positive regulation of hydrogen sulfide biosynthetic process	0.176221	ENSG00000185591	SP1
GO:1904978	0.0247121	Inf	0.0247121	1	1	regulation of endosome organization	0.176221	ENSG00000159082	SYNJ1
GO:1904980	0.0247121	Inf	0.0247121	1	1	positive regulation of endosome organization	0.176221	ENSG00000159082	SYNJ1
GO:1990603	0.0247121	Inf	0.0247121	1	1	dark adaptation	0.176221	ENSG00000164329	PAPD4
GO:2000661	0.0247121	Inf	0.0247121	1	1	positive regulation of interleukin-1-mediated signaling pathway	0.176221	ENSG00000115594	IL1R1
GO:2000864	0.0247121	Inf	0.0247121	1	1	regulation of estradiol secretion	0.176221	ENSG00000117139	KDM5B
GO:2001029	0.0247121	Inf	0.0247121	1	1	regulation of cellular glucuronidation	0.176221	ENSG00000171132	PRKCE
GO:2001031	0.0247121	Inf	0.0247121	1	1	positive regulation of cellular glucuronidation	0.176221	ENSG00000171132	PRKCE
GO:0042325	0.0248908	1.40281	33.4107	45	1352	regulation of phosphorylation	0.177222	ENSG00000051382,ENSG00000052795,ENSG00000072062,ENSG00000075711,ENSG00000077232,ENSG00000088888,ENSG00000102580,ENSG00000107263,ENSG00000108946,ENSG00000111199,ENSG00000111846,ENSG00000114166,ENSG00000117461,ENSG00000121236,ENSG00000121879,ENSG00000131653,ENSG00000132356,ENSG00000134313,ENSG00000135090,ENSG00000136158,ENSG00000137486,ENSG00000138193,ENSG00000139946,ENSG00000141503,ENSG00000141736…	PIK3CB,FNIP2,PRKACA,DLG1,DNAJC10,MAVS,DNAJC3,RAPGEF1,PRKAR1A,TRPV4,GCNT2,KAT2B,PIK3R3,TRIM6,PIK3CA,TRAF7,PRKAA1,KIDINS220,TAOK3,SPRY2,ARRB1,PLCE1,PELI2,MINK1,ERBB2,PRKACB,IGFBP3,FOXO1,FER,CNKSR3,DEPTOR,TAB3,NCK1,ITGB2,ALOX15,SPRY1,TSC1,AKAP13,PRKCE,EIF2AK3,SMYD3,PPARA,NBR1,MAP3K5,ADRA2B
GO:0002224	0.0250639	2.56104	2.8666	7	116	toll-like receptor signaling pathway	0.177934	ENSG00000110330,ENSG00000157625,ENSG00000160255,ENSG00000170458,ENSG00000171132,ENSG00000177189,ENSG00000205213	BIRC2,TAB3,ITGB2,CD14,PRKCE,RPS6KA3,LGR4
GO:0009101	0.0250677	1.82391	8.52567	15	345	glycoprotein biosynthetic process	0.177934	ENSG00000089163,ENSG00000092330,ENSG00000102158,ENSG00000102699,ENSG00000104723,ENSG00000111846,ENSG00000114166,ENSG00000115339,ENSG00000116406,ENSG00000117983,ENSG00000128268,ENSG00000136542,ENSG00000138696,ENSG00000158470,ENSG00000257594	SIRT4,TINF2,MAGT1,PARP4,TUSC3,GCNT2,KAT2B,GALNT3,EDEM3,MUC5B,MGAT3,GALNT5,BMPR1B,B4GALT5,GALNT4
GO:0048010	0.0252137	2.81223	2.2488	6	91	vascular endothelial growth factor receptor signaling pathway	0.178697	ENSG00000051382,ENSG00000121879,ENSG00000150760,ENSG00000158092,ENSG00000158195,ENSG00000273749	PIK3CB,PIK3CA,DOCK1,NCK1,WASF2,CYFIP1
GO:0036293	0.0253764	1.91512	7.04295	13	285	response to decreased oxygen levels	0.179359	ENSG00000089163,ENSG00000110330,ENSG00000120868,ENSG00000132356,ENSG00000144791,ENSG00000149428,ENSG00000164442,ENSG00000165699,ENSG00000166135,ENSG00000169057,ENSG00000171132,ENSG00000173376,ENSG00000186951	SIRT4,BIRC2,APAF1,PRKAA1,LIMD1,HYOU1,CITED2,TSC1,HIF1AN,MECP2,PRKCE,NDNF,PPARA
GO:0044723	0.0253846	1.71879	10.8486	18	439	single-organism carbohydrate metabolic process	0.179359	ENSG00000004799,ENSG00000005882,ENSG00000082196,ENSG00000114166,ENSG00000115840,ENSG00000116406,ENSG00000116678,ENSG00000121879,ENSG00000127334,ENSG00000132326,ENSG00000132356,ENSG00000146674,ENSG00000150907,ENSG00000159082,ENSG00000169057,ENSG00000173281,ENSG00000186951,ENSG00000257335	PDK4,PDK2,C1QTNF3,KAT2B,SLC25A12,EDEM3,LEPR,PIK3CA,DYRK2,PER2,PRKAA1,IGFBP3,FOXO1,SYNJ1,MECP2,PPP1R3B,PPARA,MGAM
GO:0021591	0.0255644	5.17817	0.642514	3	26	ventricular system development	0.180079	ENSG00000133961,ENSG00000140463,ENSG00000169057	NUMB,BBS4,MECP2
GO:0070536	0.0255644	5.17817	0.642514	3	26	protein K63-linked deubiquitination	0.180079	ENSG00000155313,ENSG00000158019,ENSG00000264522	USP25,BRE,OTUD7B
GO:1901215	0.0256034	2.23311	4.20106	9	170	negative regulation of neuron death	0.18008	ENSG00000107731,ENSG00000121879,ENSG00000135472,ENSG00000136854,ENSG00000145715,ENSG00000149428,ENSG00000169057,ENSG00000173376,ENSG00000186951	UNC5B,PIK3CA,FAIM2,STXBP1,RASA1,HYOU1,MECP2,NDNF,PPARA
GO:0000187	0.0257836	2.36524	3.53383	8	143	activation of MAPK activity	0.181072	ENSG00000051382,ENSG00000132356,ENSG00000137486,ENSG00000138193,ENSG00000157625,ENSG00000170776,ENSG00000197442,ENSG00000274286	PIK3CB,PRKAA1,ARRB1,PLCE1,TAB3,AKAP13,MAP3K5,ADRA2B
GO:0060341	0.0258932	1.51907	19.7944	29	801	regulation of cellular localization	0.181567	ENSG00000068912,ENSG00000072062,ENSG00000075711,ENSG00000082196,ENSG00000088888,ENSG00000089163,ENSG00000107816,ENSG00000107862,ENSG00000115561,ENSG00000115839,ENSG00000116574,ENSG00000120756,ENSG00000124333,ENSG00000127334,ENSG00000132326,ENSG00000133961,ENSG00000136854,ENSG00000137486,ENSG00000138032,ENSG00000141736,ENSG00000151422,ENSG00000160695,ENSG00000166263,ENSG00000171132,ENSG00000172071…	ERLEC1,PRKACA,DLG1,C1QTNF3,MAVS,SIRT4,LZTS2,GBF1,CHMP3,RAB3GAP1,RHOU,PLS1,VAMP7,DYRK2,PER2,NUMB,STXBP1,ARRB1,PPM1B,ERBB2,FER,VPS11,STXBP4,PRKCE,EIF2AK3,CD2AP,UNC13B,SREBF2,OTUD7B
GO:0006898	0.0260138	1.90798	7.06766	13	286	receptor-mediated endocytosis	0.182136	ENSG00000051382,ENSG00000085832,ENSG00000106299,ENSG00000115234,ENSG00000130164,ENSG00000137486,ENSG00000138131,ENSG00000143393,ENSG00000149428,ENSG00000159082,ENSG00000160255,ENSG00000170458,ENSG00000198087	PIK3CB,EPS15,WASL,SNX17,LDLR,ARRB1,LOXL4,PI4KB,HYOU1,SYNJ1,ITGB2,CD14,CD2AP
GO:0009890	0.02642	1.38238	36.1785	48	1464	negative regulation of biosynthetic process	0.184584	ENSG00000048052,ENSG00000052795,ENSG00000075711,ENSG00000076108,ENSG00000078687,ENSG00000080561,ENSG00000082196,ENSG00000089163,ENSG00000092330,ENSG00000111199,ENSG00000111424,ENSG00000111707,ENSG00000111727,ENSG00000113916,ENSG00000116678,ENSG00000117036,ENSG00000117139,ENSG00000117625,ENSG00000119669,ENSG00000121236,ENSG00000132326,ENSG00000132356,ENSG00000136169,ENSG00000136231,ENSG00000144791…	HDAC9,FNIP2,DLG1,BAZ2A,TNRC6C,MID2,C1QTNF3,SIRT4,TINF2,TRPV4,VDR,SUDS3,HCFC2,BCL6,LEPR,ETV3,KDM5B,RCOR3,IRF2BPL,TRIM6,PER2,PRKAA1,SETDB2,IGF2BP3,LIMD1,FOXO1,THRB,JAZF1,NCK1,CITED2,ZHX1,TSC1,HIF1AN,IRF2,MECP2,ZNF217,EIF2AK3,PHF8,NR2F1,ZFP90,PPARA,MPHOSPH8,DAPK1,STRN3,KANK2,SREBF2,LGR4,OTUD7B
GO:0034113	0.026523	3.78571	1.13676	4	46	heterotypic cell-cell adhesion	0.184584	ENSG00000046604,ENSG00000111846,ENSG00000160255,ENSG00000161905	DSG2,GCNT2,ITGB2,ALOX15
GO:0045661	0.026523	3.78571	1.13676	4	46	regulation of myoblast differentiation	0.184584	ENSG00000132589,ENSG00000146674,ENSG00000166135,ENSG00000197442	FLOT2,IGFBP3,HIF1AN,MAP3K5
GO:1901185	0.026523	3.78571	1.13676	4	46	negative regulation of ERBB signaling pathway	0.184584	ENSG00000085832,ENSG00000115145,ENSG00000136158,ENSG00000164056	EPS15,STAM2,SPRY2,SPRY1
GO:0098609	0.0266289	1.42984	28.3448	39	1147	cell-cell adhesion	0.185043	ENSG00000026950,ENSG00000046604,ENSG00000051382,ENSG00000064201,ENSG00000075711,ENSG00000085832,ENSG00000107263,ENSG00000108946,ENSG00000111199,ENSG00000111846,ENSG00000113282,ENSG00000113916,ENSG00000116678,ENSG00000117868,ENSG00000119139,ENSG00000121879,ENSG00000127603,ENSG00000130396,ENSG00000132589,ENSG00000133961,ENSG00000136854,ENSG00000138594,ENSG00000141503,ENSG00000141736,ENSG00000151422…	BTN3A1,DSG2,PIK3CB,TSPAN32,DLG1,EPS15,RAPGEF1,PRKAR1A,TRPV4,GCNT2,CLINT1,BCL6,LEPR,ESYT2,TJP2,PIK3CA,MACF1,MLLT4,FLOT2,NUMB,STXBP1,TMOD3,MINK1,ERBB2,FER,CXADR,NCK1,WASF2,ITGB2,ALOX15,PDLIM5,ARFIP1,CITED2,TSC1,PTPRM,SPTBN2,SEPT9,PPARA,CD2AP
GO:0016569	0.0267936	1.63546	13.2951	21	538	chromatin modification	0.185898	ENSG00000048052,ENSG00000055609,ENSG00000076108,ENSG00000107077,ENSG00000111707,ENSG00000113916,ENSG00000114166,ENSG00000117139,ENSG00000124151,ENSG00000132326,ENSG00000132356,ENSG00000136169,ENSG00000137486,ENSG00000158019,ENSG00000158290,ENSG00000169057,ENSG00000172943,ENSG00000173011,ENSG00000173575,ENSG00000185420,ENSG00000204463	HDAC9,KMT2C,BAZ2A,KDM4C,SUDS3,BCL6,KAT2B,KDM5B,NCOA3,PER2,PRKAA1,SETDB2,ARRB1,BRE,CUL4B,MECP2,PHF8,TADA2B,CHD2,SMYD3,BAG6
GO:0001933	0.0268322	1.76943	9.36588	16	379	negative regulation of protein phosphorylation	0.185898	ENSG00000075711,ENSG00000077232,ENSG00000102580,ENSG00000107263,ENSG00000108946,ENSG00000114166,ENSG00000135090,ENSG00000136158,ENSG00000137486,ENSG00000146674,ENSG00000150907,ENSG00000153721,ENSG00000155792,ENSG00000158092,ENSG00000164056,ENSG00000185420	DLG1,DNAJC10,DNAJC3,RAPGEF1,PRKAR1A,KAT2B,TAOK3,SPRY2,ARRB1,IGFBP3,FOXO1,CNKSR3,DEPTOR,NCK1,SPRY1,SMYD3
GO:0001568	0.0274653	1.61128	14.1353	22	572	blood vessel development	0.189768	ENSG00000005108,ENSG00000048052,ENSG00000051382,ENSG00000075223,ENSG00000105855,ENSG00000107263,ENSG00000107731,ENSG00000108175,ENSG00000115234,ENSG00000116678,ENSG00000121879,ENSG00000140199,ENSG00000141736,ENSG00000145715,ENSG00000150907,ENSG00000158195,ENSG00000160255,ENSG00000162434,ENSG00000166135,ENSG00000172071,ENSG00000173376,ENSG00000173482	THSD7A,HDAC9,PIK3CB,SEMA3C,ITGB8,RAPGEF1,UNC5B,ZMIZ1,SNX17,LEPR,PIK3CA,SLC12A6,ERBB2,RASA1,FOXO1,WASF2,ITGB2,JAK1,HIF1AN,EIF2AK3,NDNF,PTPRM
GO:0007155	0.0274728	1.35476	41.5905	54	1683	cell adhesion	0.189768	ENSG00000026950,ENSG00000046604,ENSG00000051382,ENSG00000064201,ENSG00000075711,ENSG00000085832,ENSG00000100852,ENSG00000105855,ENSG00000106714,ENSG00000107263,ENSG00000108946,ENSG00000111199,ENSG00000111348,ENSG00000111846,ENSG00000112851,ENSG00000113282,ENSG00000113916,ENSG00000116678,ENSG00000117868,ENSG00000119139,ENSG00000119535,ENSG00000121879,ENSG00000127603,ENSG00000130396,ENSG00000132589…	BTN3A1,DSG2,PIK3CB,TSPAN32,DLG1,EPS15,ARHGAP5,ITGB8,CNTNAP3,RAPGEF1,PRKAR1A,TRPV4,ARHGDIB,GCNT2,ERBB2IP,CLINT1,BCL6,LEPR,ESYT2,TJP2,CSF3R,PIK3CA,MACF1,MLLT4,FLOT2,NUMB,STXBP1,TMOD3,FBLN5,MINK1,ERBB2,LPP,RASA1,DOCK1,MAGI1,FER,CNTNAP3B,CXADR,NCK1,WASF2,ITGB2,ALOX15,PDLIM5,ARFIP1,CITED2,TSC1,PRKCE,NDNF,PTPRM,SPTBN2,SEPT9,PPARA,CD2AP,TGM2,FMN1
GO:0006476	0.0276898	2.74724	2.29822	6	93	protein deacetylation	0.190657	ENSG00000048052,ENSG00000076108,ENSG00000089163,ENSG00000111707,ENSG00000113916,ENSG00000132326	HDAC9,BAZ2A,SIRT4,SUDS3,BCL6,PER2
GO:0002275	0.0278216	3.10888	1.70513	5	69	myeloid cell activation involved in immune response	0.190657	ENSG00000124333,ENSG00000151422,ENSG00000159842,ENSG00000171132,ENSG00000186716	VAMP7,FER,ABR,PRKCE,BCR
GO:0022406	0.0278216	3.10888	1.70513	5	69	membrane docking	0.190657	ENSG00000073969,ENSG00000136854,ENSG00000144036,ENSG00000160695,ENSG00000198722	NSF,STXBP1,EXOC6B,VPS11,UNC13B
GO:0030104	0.0278216	3.10888	1.70513	5	69	water homeostasis	0.190657	ENSG00000072062,ENSG00000108946,ENSG00000111199,ENSG00000142875,ENSG00000167306	PRKACA,PRKAR1A,TRPV4,PRKACB,MYO5B
GO:1901879	0.0278216	3.10888	1.70513	5	69	regulation of protein depolymerization	0.190657	ENSG00000006747,ENSG00000111199,ENSG00000138594,ENSG00000151491,ENSG00000173898	SCIN,TRPV4,TMOD3,EPS8,SPTBN2
GO:1902580	0.0278488	1.43804	26.7138	37	1081	single-organism cellular localization	0.190657	ENSG00000008952,ENSG00000025796,ENSG00000073969,ENSG00000075711,ENSG00000082196,ENSG00000088888,ENSG00000100242,ENSG00000102910,ENSG00000104133,ENSG00000106299,ENSG00000113163,ENSG00000113916,ENSG00000115839,ENSG00000120756,ENSG00000124333,ENSG00000125124,ENSG00000127334,ENSG00000127603,ENSG00000130779,ENSG00000132589,ENSG00000133961,ENSG00000136158,ENSG00000136854,ENSG00000138032,ENSG00000140463…	SEC62,SEC63,NSF,DLG1,C1QTNF3,MAVS,SUN2,LONP2,SPG11,WASL,COL4A3BP,BCL6,RAB3GAP1,PLS1,VAMP7,BBS2,DYRK2,MACF1,CLIP1,FLOT2,NUMB,SPRY2,STXBP1,PPM1B,BBS4,ERBB2,FER,SYNJ1,ITGB2,MCM3AP,PIGR,SPRY1,TSC1,PACS1,SRPR,UNC13B,BAG6
GO:0045088	0.028005	1.79612	8.64923	15	350	regulation of innate immune response	0.191444	ENSG00000072062,ENSG00000088888,ENSG00000110330,ENSG00000112851,ENSG00000121236,ENSG00000129657,ENSG00000142875,ENSG00000157625,ENSG00000160255,ENSG00000162434,ENSG00000166747,ENSG00000170458,ENSG00000171132,ENSG00000177189,ENSG00000205213	PRKACA,MAVS,BIRC2,ERBB2IP,TRIM6,SEC14L1,PRKACB,TAB3,ITGB2,JAK1,AP1G1,CD14,PRKCE,RPS6KA3,LGR4
GO:0010591	0.0282461	4.9621	0.667226	3	27	regulation of lamellipodium assembly	0.191676	ENSG00000141298,ENSG00000151422,ENSG00000158195	SSH2,FER,WASF2
GO:0036230	0.0282461	4.9621	0.667226	3	27	granulocyte activation	0.191676	ENSG00000124333,ENSG00000159842,ENSG00000186716	VAMP7,ABR,BCR
GO:0043276	0.0282461	4.9621	0.667226	3	27	anoikis	0.191676	ENSG00000004799,ENSG00000118454,ENSG00000121879	PDK4,ANKRD13C,PIK3CA
GO:0045746	0.0282461	4.9621	0.667226	3	27	negative regulation of Notch signaling pathway	0.191676	ENSG00000113916,ENSG00000133961,ENSG00000166135	BCL6,NUMB,HIF1AN
GO:1904292	0.0282461	4.9621	0.667226	3	27	regulation of ERAD pathway	0.191676	ENSG00000068912,ENSG00000155313,ENSG00000204463	ERLEC1,USP25,BAG6
GO:0043409	0.0287142	2.31339	3.60797	8	146	negative regulation of MAPK cascade	0.193575	ENSG00000075711,ENSG00000107263,ENSG00000135090,ENSG00000136158,ENSG00000137486,ENSG00000150907,ENSG00000153721,ENSG00000164056	DLG1,RAPGEF1,TAOK3,SPRY2,ARRB1,FOXO1,CNKSR3,SPRY1
GO:0032501	0.0289028	1.21595	168.734	188	6828	multicellular organismal process	0.193575	ENSG00000001561,ENSG00000004799,ENSG00000005108,ENSG00000006468,ENSG00000006747,ENSG00000007237,ENSG00000008086,ENSG00000019186,ENSG00000025796,ENSG00000026950,ENSG00000042980,ENSG00000046604,ENSG00000048052,ENSG00000051382,ENSG00000064201,ENSG00000071242,ENSG00000072062,ENSG00000075223,ENSG00000075711,ENSG00000077157,ENSG00000082196,ENSG00000088888,ENSG00000100280,ENSG00000100592,ENSG00000100852…	ENPP4,PDK4,THSD7A,ETV1,SCIN,GAS7,CDKL5,CYP24A1,SEC63,BTN3A1,ADAM28,DSG2,HDAC9,PIK3CB,TSPAN32,RPS6KA2,PRKACA,SEMA3C,DLG1,PPP1R12B,C1QTNF3,MAVS,AP1B1,DAAM1,ARHGAP5,STS,MAGT1,SPG11,TUSC3,SIPA1L3,ITGB8,TAX1BP1,COBL,RAPGEF1,UNC5B,LIPA,LZTS2,ZMIZ1,RAI1,PRKAR1A,DTX4,BIRC2,TRPV4,ARHGDIB,VDR,SUDS3,GCNT2,ERBB2IP,COL4A3BP,LNPEP,BCL6,SNX17,EFEMP1,RAB3GAP1,DHCR24,LEPR,KDM5B,TJP2,RAB14,CSF3R,HOXB5,KIAA1217,PLS…
GO:0003356	0.0289113	8.80813	0.271833	2	11	regulation of cilium beat frequency	0.193575	ENSG00000125124,ENSG00000140463	BBS2,BBS4
GO:0033169	0.0289113	8.80813	0.271833	2	11	histone H3-K9 demethylation	0.193575	ENSG00000107077,ENSG00000172943	KDM4C,PHF8
GO:0034116	0.0289113	8.80813	0.271833	2	11	positive regulation of heterotypic cell-cell adhesion	0.193575	ENSG00000111846,ENSG00000161905	GCNT2,ALOX15
GO:0043301	0.0289113	8.80813	0.271833	2	11	negative regulation of leukocyte degranulation	0.193575	ENSG00000159842,ENSG00000186716	ABR,BCR
GO:0051764	0.0289113	8.80813	0.271833	2	11	actin crosslink formation	0.193575	ENSG00000120756,ENSG00000151491	PLS1,EPS8
GO:0060294	0.0289113	8.80813	0.271833	2	11	cilium movement involved in cell motility	0.193575	ENSG00000125124,ENSG00000140463	BBS2,BBS4
GO:0042326	0.028914	1.71968	10.2308	17	414	negative regulation of phosphorylation	0.193575	ENSG00000075711,ENSG00000077232,ENSG00000102580,ENSG00000107263,ENSG00000108946,ENSG00000114166,ENSG00000135090,ENSG00000136158,ENSG00000137486,ENSG00000146674,ENSG00000150907,ENSG00000153721,ENSG00000155792,ENSG00000158092,ENSG00000164056,ENSG00000185420,ENSG00000186951	DLG1,DNAJC10,DNAJC3,RAPGEF1,PRKAR1A,KAT2B,TAOK3,SPRY2,ARRB1,IGFBP3,FOXO1,CNKSR3,DEPTOR,NCK1,SPRY1,SMYD3,PPARA
GO:0002253	0.0289507	1.64202	12.6032	20	510	activation of immune response	0.193575	ENSG00000026950,ENSG00000051382,ENSG00000072062,ENSG00000088888,ENSG00000106299,ENSG00000110330,ENSG00000112851,ENSG00000121879,ENSG00000129657,ENSG00000142875,ENSG00000150760,ENSG00000157625,ENSG00000158092,ENSG00000158195,ENSG00000160255,ENSG00000170458,ENSG00000171132,ENSG00000177189,ENSG00000205213,ENSG00000273749	BTN3A1,PIK3CB,PRKACA,MAVS,WASL,BIRC2,ERBB2IP,PIK3CA,SEC14L1,PRKACB,DOCK1,TAB3,NCK1,WASF2,ITGB2,CD14,PRKCE,RPS6KA3,LGR4,CYFIP1
GO:0046854	0.0289861	2.71585	2.32294	6	94	phosphatidylinositol phosphorylation	0.193575	ENSG00000051382,ENSG00000121879,ENSG00000133056,ENSG00000141736,ENSG00000143393,ENSG00000150867	PIK3CB,PIK3CA,PIK3C2B,ERBB2,PI4KB,PIP4K2A
GO:0045859	0.0290645	1.53856	17.4962	26	708	regulation of protein kinase activity	0.193609	ENSG00000051382,ENSG00000072062,ENSG00000075711,ENSG00000102580,ENSG00000107263,ENSG00000108946,ENSG00000114166,ENSG00000121879,ENSG00000131653,ENSG00000132356,ENSG00000134313,ENSG00000135090,ENSG00000136158,ENSG00000137486,ENSG00000138193,ENSG00000141736,ENSG00000142875,ENSG00000155792,ENSG00000157625,ENSG00000158092,ENSG00000164056,ENSG00000165699,ENSG00000170776,ENSG00000185420,ENSG00000197442…	PIK3CB,PRKACA,DLG1,DNAJC3,RAPGEF1,PRKAR1A,KAT2B,PIK3CA,TRAF7,PRKAA1,KIDINS220,TAOK3,SPRY2,ARRB1,PLCE1,ERBB2,PRKACB,DEPTOR,TAB3,NCK1,SPRY1,TSC1,AKAP13,SMYD3,MAP3K5,ADRA2B
GO:0072657	0.0290748	1.66431	11.8124	19	478	protein localization to membrane	0.193609	ENSG00000008952,ENSG00000025796,ENSG00000073969,ENSG00000075711,ENSG00000115839,ENSG00000120756,ENSG00000124333,ENSG00000125124,ENSG00000127603,ENSG00000130779,ENSG00000132589,ENSG00000133961,ENSG00000136854,ENSG00000141736,ENSG00000160255,ENSG00000162896,ENSG00000175115,ENSG00000182934,ENSG00000204463	SEC62,SEC63,NSF,DLG1,RAB3GAP1,PLS1,VAMP7,BBS2,MACF1,CLIP1,FLOT2,NUMB,STXBP1,ERBB2,ITGB2,PIGR,PACS1,SRPR,BAG6
GO:0022610	0.0291307	1.34924	41.7387	54	1689	biological adhesion	0.193702	ENSG00000026950,ENSG00000046604,ENSG00000051382,ENSG00000064201,ENSG00000075711,ENSG00000085832,ENSG00000100852,ENSG00000105855,ENSG00000106714,ENSG00000107263,ENSG00000108946,ENSG00000111199,ENSG00000111348,ENSG00000111846,ENSG00000112851,ENSG00000113282,ENSG00000113916,ENSG00000116678,ENSG00000117868,ENSG00000119139,ENSG00000119535,ENSG00000121879,ENSG00000127603,ENSG00000130396,ENSG00000132589…	BTN3A1,DSG2,PIK3CB,TSPAN32,DLG1,EPS15,ARHGAP5,ITGB8,CNTNAP3,RAPGEF1,PRKAR1A,TRPV4,ARHGDIB,GCNT2,ERBB2IP,CLINT1,BCL6,LEPR,ESYT2,TJP2,CSF3R,PIK3CA,MACF1,MLLT4,FLOT2,NUMB,STXBP1,TMOD3,FBLN5,MINK1,ERBB2,LPP,RASA1,DOCK1,MAGI1,FER,CNTNAP3B,CXADR,NCK1,WASF2,ITGB2,ALOX15,PDLIM5,ARFIP1,CITED2,TSC1,PRKCE,NDNF,PTPRM,SPTBN2,SEPT9,PPARA,CD2AP,TGM2,FMN1
GO:0033365	0.0293358	1.48061	21.6972	31	878	protein localization to organelle	0.194786	ENSG00000008952,ENSG00000025796,ENSG00000080561,ENSG00000082196,ENSG00000088888,ENSG00000089163,ENSG00000092330,ENSG00000100242,ENSG00000102910,ENSG00000107816,ENSG00000107862,ENSG00000113916,ENSG00000114331,ENSG00000115839,ENSG00000116574,ENSG00000118454,ENSG00000124333,ENSG00000125124,ENSG00000127334,ENSG00000138032,ENSG00000140463,ENSG00000159256,ENSG00000160294,ENSG00000160695,ENSG00000172071…	SEC62,SEC63,MID2,C1QTNF3,MAVS,SIRT4,TINF2,SUN2,LONP2,LZTS2,GBF1,BCL6,ACAP2,RAB3GAP1,RHOU,ANKRD13C,VAMP7,BBS2,DYRK2,PPM1B,BBS4,MORC3,MCM3AP,VPS11,EIF2AK3,PACS1,SRPR,CD2AP,SREBF2,BAG6,OTUD7B
GO:0048729	0.0294141	1.58147	15.0497	23	609	tissue morphogenesis	0.195026	ENSG00000072062,ENSG00000075223,ENSG00000075711,ENSG00000100592,ENSG00000106078,ENSG00000108946,ENSG00000111424,ENSG00000117139,ENSG00000120868,ENSG00000133961,ENSG00000136158,ENSG00000136169,ENSG00000138002,ENSG00000140463,ENSG00000142875,ENSG00000149418,ENSG00000163637,ENSG00000164056,ENSG00000165699,ENSG00000184634,ENSG00000198959,ENSG00000205213,ENSG00000248905	PRKACA,SEMA3C,DLG1,DAAM1,COBL,PRKAR1A,VDR,KDM5B,APAF1,NUMB,SPRY2,SETDB2,IFT172,BBS4,PRKACB,ST14,PRICKLE2,SPRY1,TSC1,MED12,TGM2,LGR4,FMN1
GO:0071383	0.0297657	1.99083	5.73321	11	232	cellular response to steroid hormone stimulus	0.197075	ENSG00000111424,ENSG00000124151,ENSG00000150907,ENSG00000151090,ENSG00000170776,ENSG00000175745,ENSG00000184634,ENSG00000185420,ENSG00000186951,ENSG00000196792,ENSG00000197256	VDR,NCOA3,FOXO1,THRB,AKAP13,NR2F1,MED12,SMYD3,PPARA,STRN3,KANK2
GO:0044711	0.0299478	1.39327	32.0763	43	1298	single-organism biosynthetic process	0.197998	ENSG00000001630,ENSG00000004799,ENSG00000005882,ENSG00000051382,ENSG00000067064,ENSG00000073734,ENSG00000082196,ENSG00000089163,ENSG00000100330,ENSG00000104549,ENSG00000108389,ENSG00000109452,ENSG00000111424,ENSG00000113163,ENSG00000114166,ENSG00000115425,ENSG00000115840,ENSG00000116133,ENSG00000116678,ENSG00000117461,ENSG00000121879,ENSG00000127334,ENSG00000130164,ENSG00000132196,ENSG00000132326…	CYP51A1,PDK4,PDK2,PIK3CB,IDI1,ABCB11,C1QTNF3,SIRT4,MTMR3,SQLE,MTMR4,INPP4B,VDR,COL4A3BP,KAT2B,PECR,SLC25A12,DHCR24,LEPR,PIK3R3,PIK3CA,DYRK2,LDLR,HSD17B7,PER2,PRKAA1,PIK3C2B,PNPLA8,PLCE1,PAPSS1,GNAL,PI4KB,PIP4K2A,FOXO1,SYNJ1,LSS,ALOX15,CMPK1,MTM1,PPP1R3B,ACBD3,PPARA,DPYD
GO:0006470	0.0301182	1.9212	6.47457	12	262	protein dephosphorylation	0.19884	ENSG00000075711,ENSG00000100330,ENSG00000108389,ENSG00000138032,ENSG00000141298,ENSG00000143079,ENSG00000155093,ENSG00000158092,ENSG00000165699,ENSG00000171100,ENSG00000173281,ENSG00000173482	DLG1,MTMR3,MTMR4,PPM1B,SSH2,CTTNBP2NL,PTPRN2,NCK1,TSC1,MTM1,PPP1R3B,PTPRM
GO:0002698	0.0303216	2.68517	2.34765	6	95	negative regulation of immune effector process	0.199898	ENSG00000113916,ENSG00000129657,ENSG00000138032,ENSG00000151422,ENSG00000159842,ENSG00000186716	BCL6,SEC14L1,PPM1B,FER,ABR,BCR
GO:0030834	0.0304438	3.61319	1.18618	4	48	regulation of actin filament depolymerization	0.200418	ENSG00000006747,ENSG00000138594,ENSG00000151491,ENSG00000173898	SCIN,TMOD3,EPS8,SPTBN2
GO:0090150	0.0305328	1.77448	8.74808	15	354	establishment of protein localization to membrane	0.200718	ENSG00000008952,ENSG00000025796,ENSG00000073969,ENSG00000075711,ENSG00000115839,ENSG00000120756,ENSG00000124333,ENSG00000125124,ENSG00000127603,ENSG00000130779,ENSG00000132589,ENSG00000141736,ENSG00000175115,ENSG00000182934,ENSG00000204463	SEC62,SEC63,NSF,DLG1,RAB3GAP1,PLS1,VAMP7,BBS2,MACF1,CLIP1,FLOT2,ERBB2,PACS1,SRPR,BAG6
GO:0097581	0.0309855	3.0143	1.75456	5	71	lamellipodium organization	0.202246	ENSG00000141298,ENSG00000151422,ENSG00000158092,ENSG00000158195,ENSG00000273749	SSH2,FER,NCK1,WASF2,CYFIP1
GO:1901888	0.0309855	3.0143	1.75456	5	71	regulation of cell junction assembly	0.202246	ENSG00000072062,ENSG00000107263,ENSG00000127603,ENSG00000165699,ENSG00000248905	PRKACA,RAPGEF1,MACF1,TSC1,FMN1
GO:1902679	0.0310045	1.41204	28.666	39	1160	negative regulation of RNA biosynthetic process	0.202246	ENSG00000048052,ENSG00000052795,ENSG00000075711,ENSG00000076108,ENSG00000080561,ENSG00000089163,ENSG00000111199,ENSG00000111424,ENSG00000111707,ENSG00000111727,ENSG00000113916,ENSG00000117036,ENSG00000117139,ENSG00000117625,ENSG00000119669,ENSG00000121236,ENSG00000132326,ENSG00000136169,ENSG00000144791,ENSG00000150907,ENSG00000151090,ENSG00000153814,ENSG00000158092,ENSG00000164442,ENSG00000165156…	HDAC9,FNIP2,DLG1,BAZ2A,MID2,SIRT4,TRPV4,VDR,SUDS3,HCFC2,BCL6,ETV3,KDM5B,RCOR3,IRF2BPL,TRIM6,PER2,SETDB2,LIMD1,FOXO1,THRB,JAZF1,NCK1,CITED2,ZHX1,HIF1AN,IRF2,MECP2,ZNF217,PHF8,NR2F1,ZFP90,PPARA,MPHOSPH8,STRN3,KANK2,SREBF2,LGR4,OTUD7B
GO:0016577	0.0310711	4.76333	0.691939	3	28	histone demethylation	0.202246	ENSG00000107077,ENSG00000117139,ENSG00000172943	KDM4C,KDM5B,PHF8
GO:0032228	0.0310711	4.76333	0.691939	3	28	regulation of synaptic transmission, GABAergic	0.202246	ENSG00000136854,ENSG00000171132,ENSG00000185666	STXBP1,PRKCE,SYN3
GO:0045920	0.0310711	4.76333	0.691939	3	28	negative regulation of exocytosis	0.202246	ENSG00000119541,ENSG00000159842,ENSG00000186716	VPS4B,ABR,BCR
GO:0050690	0.0310711	4.76333	0.691939	3	28	regulation of defense response to virus by virus	0.202246	ENSG00000100280,ENSG00000166747,ENSG00000175115	AP1B1,AP1G1,PACS1
GO:0007399	0.031587	1.31013	51.8707	65	2099	nervous system development	0.205316	ENSG00000006468,ENSG00000007237,ENSG00000008086,ENSG00000048052,ENSG00000072062,ENSG00000075223,ENSG00000075711,ENSG00000104133,ENSG00000106078,ENSG00000107263,ENSG00000107731,ENSG00000111199,ENSG00000111707,ENSG00000113916,ENSG00000115839,ENSG00000120868,ENSG00000124333,ENSG00000125124,ENSG00000127603,ENSG00000130779,ENSG00000132326,ENSG00000133961,ENSG00000134313,ENSG00000135472,ENSG00000136237…	ETV1,GAS7,CDKL5,HDAC9,PRKACA,SEMA3C,DLG1,SPG11,COBL,RAPGEF1,UNC5B,TRPV4,SUDS3,BCL6,RAB3GAP1,APAF1,VAMP7,BBS2,MACF1,CLIP1,PER2,NUMB,KIDINS220,FAIM2,RAPGEF5,STXBP1,IFT172,BMPR1B,BBS4,SSH2,MINK1,ERBB2,PRKACB,ARHGAP26,FBXO38,ST14,CRIM1,NCK1,CUL4B,ABR,PDLIM5,PAPD4,TSC1,MECP2,ZNF217,EIF2AK3,MACROD2,PHF8,NDNF,PTPRM,SPTBN2,NR2F1,RPS6KA3,NCMAP,MED12,BCR,MBP,ITSN2,ATL1,UNC13B,MBD5,BAG6,FMN1,CYFIP1,ADRA2B
GO:0009100	0.0316536	1.7304	9.56358	16	387	glycoprotein metabolic process	0.20546	ENSG00000089163,ENSG00000092330,ENSG00000102158,ENSG00000102699,ENSG00000104723,ENSG00000111846,ENSG00000114166,ENSG00000115339,ENSG00000116406,ENSG00000117983,ENSG00000128268,ENSG00000136542,ENSG00000138696,ENSG00000158470,ENSG00000173376,ENSG00000257594	SIRT4,TINF2,MAGT1,PARP4,TUSC3,GCNT2,KAT2B,GALNT3,EDEM3,MUC5B,MGAT3,GALNT5,BMPR1B,B4GALT5,NDNF,GALNT4
GO:1901700	0.0320281	1.37146	34.8688	46	1411	response to oxygen-containing compound	0.207375	ENSG00000004799,ENSG00000005882,ENSG00000019186,ENSG00000046604,ENSG00000048052,ENSG00000071242,ENSG00000072062,ENSG00000107263,ENSG00000108946,ENSG00000110324,ENSG00000110330,ENSG00000111199,ENSG00000111424,ENSG00000112851,ENSG00000114166,ENSG00000114698,ENSG00000116406,ENSG00000117461,ENSG00000121236,ENSG00000121879,ENSG00000124151,ENSG00000130164,ENSG00000132356,ENSG00000137486,ENSG00000140092…	PDK4,PDK2,CYP24A1,DSG2,HDAC9,RPS6KA2,PRKACA,RAPGEF1,PRKAR1A,IL10RA,BIRC2,TRPV4,VDR,ERBB2IP,KAT2B,PLSCR4,EDEM3,PIK3R3,TRIM6,PIK3CA,NCOA3,LDLR,PRKAA1,ARRB1,FBLN5,PRKACB,FOXO1,FER,EPS8,PTPRN2,ABR,TSC1,STXBP4,AHCYL1,CD14,PRKCE,RPS6KA3,SMYD3,SP1,BCR,PPARA,STRN3,KANK2,MAP3K5,UNC13B,MBD5
GO:0043401	0.0320383	2.13914	4.37404	9	177	steroid hormone mediated signaling pathway	0.207375	ENSG00000111424,ENSG00000124151,ENSG00000151090,ENSG00000170776,ENSG00000175745,ENSG00000184634,ENSG00000186951,ENSG00000196792,ENSG00000197256	VDR,NCOA3,THRB,AKAP13,NR2F1,MED12,PPARA,STRN3,KANK2
GO:0000165	0.0323053	1.47684	21.03	30	851	MAPK cascade	0.208812	ENSG00000051382,ENSG00000075711,ENSG00000107263,ENSG00000111199,ENSG00000111846,ENSG00000131653,ENSG00000132356,ENSG00000134313,ENSG00000135090,ENSG00000136158,ENSG00000137486,ENSG00000138193,ENSG00000139946,ENSG00000141503,ENSG00000141736,ENSG00000145715,ENSG00000146674,ENSG00000150907,ENSG00000153721,ENSG00000157625,ENSG00000161905,ENSG00000162434,ENSG00000164056,ENSG00000170776,ENSG00000171132…	PIK3CB,DLG1,RAPGEF1,TRPV4,GCNT2,TRAF7,PRKAA1,KIDINS220,TAOK3,SPRY2,ARRB1,PLCE1,PELI2,MINK1,ERBB2,RASA1,IGFBP3,FOXO1,CNKSR3,TAB3,ALOX15,JAK1,SPRY1,AKAP13,PRKCE,SPTBN2,NBR1,MAP3K5,RASGEF1A,ADRA2B
GO:0050714	0.0324363	2.03879	5.09069	10	206	positive regulation of protein secretion	0.209357	ENSG00000082196,ENSG00000111199,ENSG00000113615,ENSG00000121236,ENSG00000137486,ENSG00000143457,ENSG00000170458,ENSG00000171132,ENSG00000182782,ENSG00000198722	C1QTNF3,TRPV4,SEC24A,TRIM6,ARRB1,GOLPH3L,CD14,PRKCE,HCAR2,UNC13B
GO:0009991	0.032512	1.69343	10.3791	17	420	response to extracellular stimulus	0.209357	ENSG00000004799,ENSG00000005882,ENSG00000019186,ENSG00000100330,ENSG00000111199,ENSG00000111424,ENSG00000120868,ENSG00000125124,ENSG00000132356,ENSG00000133056,ENSG00000140463,ENSG00000150907,ENSG00000165699,ENSG00000172071,ENSG00000186951,ENSG00000197256,ENSG00000198911	PDK4,PDK2,CYP24A1,MTMR3,TRPV4,VDR,APAF1,BBS2,PRKAA1,PIK3C2B,BBS4,FOXO1,TSC1,EIF2AK3,PPARA,KANK2,SREBF2
GO:0006911	0.0325255	3.53268	1.21089	4	49	phagocytosis, engulfment	0.209357	ENSG00000124333,ENSG00000144366,ENSG00000150760,ENSG00000161905	VAMP7,GULP1,DOCK1,ALOX15
GO:0023014	0.033033	1.46419	21.9196	31	887	signal transduction by protein phosphorylation	0.212202	ENSG00000051382,ENSG00000075711,ENSG00000107263,ENSG00000111199,ENSG00000111846,ENSG00000131653,ENSG00000132356,ENSG00000134313,ENSG00000135090,ENSG00000136158,ENSG00000137486,ENSG00000138193,ENSG00000138696,ENSG00000139946,ENSG00000141503,ENSG00000141736,ENSG00000145715,ENSG00000146674,ENSG00000150907,ENSG00000153721,ENSG00000157625,ENSG00000161905,ENSG00000162434,ENSG00000164056,ENSG00000170776…	PIK3CB,DLG1,RAPGEF1,TRPV4,GCNT2,TRAF7,PRKAA1,KIDINS220,TAOK3,SPRY2,ARRB1,PLCE1,BMPR1B,PELI2,MINK1,ERBB2,RASA1,IGFBP3,FOXO1,CNKSR3,TAB3,ALOX15,JAK1,SPRY1,AKAP13,PRKCE,SPTBN2,NBR1,MAP3K5,RASGEF1A,ADRA2B
GO:0016241	0.0330592	2.40545	3.03959	7	123	regulation of macroautophagy	0.212202	ENSG00000100330,ENSG00000108239,ENSG00000115839,ENSG00000150867,ENSG00000151502,ENSG00000165699,ENSG00000171100	MTMR3,TBC1D12,RAB3GAP1,PIP4K2A,VPS26B,TSC1,MTM1
GO:0010558	0.0332889	1.37194	34.078	45	1379	negative regulation of macromolecule biosynthetic process	0.213381	ENSG00000048052,ENSG00000052795,ENSG00000075711,ENSG00000076108,ENSG00000078687,ENSG00000080561,ENSG00000089163,ENSG00000092330,ENSG00000111199,ENSG00000111424,ENSG00000111707,ENSG00000111727,ENSG00000113916,ENSG00000117036,ENSG00000117139,ENSG00000117625,ENSG00000119669,ENSG00000121236,ENSG00000132326,ENSG00000136169,ENSG00000136231,ENSG00000144791,ENSG00000150907,ENSG00000151090,ENSG00000153814…	HDAC9,FNIP2,DLG1,BAZ2A,TNRC6C,MID2,SIRT4,TINF2,TRPV4,VDR,SUDS3,HCFC2,BCL6,ETV3,KDM5B,RCOR3,IRF2BPL,TRIM6,PER2,SETDB2,IGF2BP3,LIMD1,FOXO1,THRB,JAZF1,NCK1,CITED2,ZHX1,TSC1,HIF1AN,IRF2,MECP2,ZNF217,EIF2AK3,PHF8,NR2F1,ZFP90,PPARA,MPHOSPH8,DAPK1,STRN3,KANK2,SREBF2,LGR4,OTUD7B
GO:0030866	0.0340387	4.57984	0.716651	3	29	cortical actin cytoskeleton organization	0.214644	ENSG00000075711,ENSG00000120756,ENSG00000159023	DLG1,PLS1,EPB41
GO:0031641	0.0340387	4.57984	0.716651	3	29	regulation of myelination	0.214644	ENSG00000075711,ENSG00000172071,ENSG00000184454	DLG1,EIF2AK3,NCMAP
GO:0042149	0.0340387	4.57984	0.716651	3	29	cellular response to glucose starvation	0.214644	ENSG00000100330,ENSG00000132356,ENSG00000172071	MTMR3,PRKAA1,EIF2AK3
GO:0043114	0.0340387	4.57984	0.716651	3	29	regulation of vascular permeability	0.214644	ENSG00000111199,ENSG00000159842,ENSG00000186716	TRPV4,ABR,BCR
GO:1902235	0.0340387	4.57984	0.716651	3	29	regulation of endoplasmic reticulum stress-induced intrinsic apoptotic signaling pathway	0.214644	ENSG00000149428,ENSG00000158092,ENSG00000172071	HYOU1,NCK1,EIF2AK3
GO:0050866	0.034096	2.23181	3.73153	8	151	negative regulation of cell activation	0.214644	ENSG00000064201,ENSG00000075711,ENSG00000108946,ENSG00000113916,ENSG00000141736,ENSG00000151422,ENSG00000159842,ENSG00000186716	TSPAN32,DLG1,PRKAR1A,BCL6,ERBB2,FER,ABR,BCR
GO:0003352	0.0341353	7.92683	0.296545	2	12	regulation of cilium movement	0.214644	ENSG00000125124,ENSG00000140463	BBS2,BBS4
GO:0010510	0.0341353	7.92683	0.296545	2	12	regulation of acetyl-CoA biosynthetic process from pyruvate	0.214644	ENSG00000004799,ENSG00000005882	PDK4,PDK2
GO:0033147	0.0341353	7.92683	0.296545	2	12	negative regulation of intracellular estrogen receptor signaling pathway	0.214644	ENSG00000196792,ENSG00000197256	STRN3,KANK2
GO:0035358	0.0341353	7.92683	0.296545	2	12	regulation of peroxisome proliferator activated receptor signaling pathway	0.214644	ENSG00000161905,ENSG00000164442	ALOX15,CITED2
GO:0039535	0.0341353	7.92683	0.296545	2	12	regulation of RIG-I signaling pathway	0.214644	ENSG00000110330,ENSG00000129657	BIRC2,SEC14L1
GO:0040037	0.0341353	7.92683	0.296545	2	12	negative regulation of fibroblast growth factor receptor signaling pathway	0.214644	ENSG00000136158,ENSG00000164056	SPRY2,SPRY1
GO:0045835	0.0341353	7.92683	0.296545	2	12	negative regulation of meiotic nuclear division	0.214644	ENSG00000071242,ENSG00000108946	RPS6KA2,PRKAR1A
GO:1904293	0.0341353	7.92683	0.296545	2	12	negative regulation of ERAD pathway	0.214644	ENSG00000068912,ENSG00000155313	ERLEC1,USP25
GO:0048858	0.0342366	1.48917	19.4484	28	787	cell projection morphogenesis	0.214989	ENSG00000006468,ENSG00000008086,ENSG00000075223,ENSG00000100271,ENSG00000104133,ENSG00000106078,ENSG00000107731,ENSG00000124333,ENSG00000125124,ENSG00000127603,ENSG00000133961,ENSG00000134313,ENSG00000136854,ENSG00000138002,ENSG00000138696,ENSG00000140463,ENSG00000141298,ENSG00000141503,ENSG00000141736,ENSG00000158195,ENSG00000163110,ENSG00000173482,ENSG00000173898,ENSG00000184640,ENSG00000198399…	ETV1,CDKL5,SEMA3C,TTLL1,SPG11,COBL,UNC5B,VAMP7,BBS2,MACF1,NUMB,KIDINS220,STXBP1,IFT172,BMPR1B,BBS4,SSH2,MINK1,ERBB2,WASF2,PDLIM5,PTPRM,SPTBN2,SEPT9,ITSN2,ATL1,FMN1,CYFIP1
GO:1900181	0.0343663	2.92528	1.80398	5	73	negative regulation of protein localization to nucleus	0.215511	ENSG00000082196,ENSG00000107816,ENSG00000127334,ENSG00000138032,ENSG00000264522	C1QTNF3,LZTS2,DYRK2,PPM1B,OTUD7B
GO:0035601	0.0345675	2.59713	2.42179	6	98	protein deacylation	0.21648	ENSG00000048052,ENSG00000076108,ENSG00000089163,ENSG00000111707,ENSG00000113916,ENSG00000132326	HDAC9,BAZ2A,SIRT4,SUDS3,BCL6,PER2
GO:0032268	0.0350275	1.29041	56.739	70	2296	regulation of cellular protein metabolic process	0.219064	ENSG00000051382,ENSG00000052795,ENSG00000072062,ENSG00000075711,ENSG00000077232,ENSG00000078687,ENSG00000084234,ENSG00000088888,ENSG00000089163,ENSG00000092330,ENSG00000100665,ENSG00000102471,ENSG00000102580,ENSG00000107185,ENSG00000107263,ENSG00000108946,ENSG00000110330,ENSG00000111199,ENSG00000111846,ENSG00000113916,ENSG00000114166,ENSG00000114316,ENSG00000115839,ENSG00000116133,ENSG00000120868…	PIK3CB,FNIP2,PRKACA,DLG1,DNAJC10,TNRC6C,APLP2,MAVS,SIRT4,TINF2,SERPINA4,NDFIP2,DNAJC3,RGP1,RAPGEF1,PRKAR1A,BIRC2,TRPV4,GCNT2,BCL6,KAT2B,USP4,RAB3GAP1,DHCR24,APAF1,TRIM6,PIK3CA,TRAF7,PER2,PRKAA1,KIDINS220,TAOK3,SPRY2,IGF2BP3,ARRB1,PLCE1,SECISBP2L,PELI2,MINK1,ERBB2,PRKACB,LIMD1,IGFBP3,FOXO1,CRIM1,FER,CNKSR3,DEPTOR,TAB3,NCK1,ITGB2,ZER1,VPS11,ALOX15,SPRY1,TSC1,MECP2,AKAP13,MTM1,PRKCE,EIF2AK3,TADA2B,R…
GO:0033674	0.0354064	1.62422	12.0842	19	489	positive regulation of kinase activity	0.221135	ENSG00000051382,ENSG00000072062,ENSG00000075711,ENSG00000107263,ENSG00000108946,ENSG00000121879,ENSG00000131653,ENSG00000132356,ENSG00000134313,ENSG00000135090,ENSG00000136158,ENSG00000137486,ENSG00000138193,ENSG00000141736,ENSG00000142875,ENSG00000157625,ENSG00000170776,ENSG00000197442,ENSG00000274286	PIK3CB,PRKACA,DLG1,RAPGEF1,PRKAR1A,PIK3CA,TRAF7,PRKAA1,KIDINS220,TAOK3,SPRY2,ARRB1,PLCE1,ERBB2,PRKACB,TAB3,AKAP13,MAP3K5,ADRA2B
GO:0035335	0.0360637	2.56904	2.4465	6	99	peptidyl-tyrosine dephosphorylation	0.224634	ENSG00000100330,ENSG00000108389,ENSG00000141298,ENSG00000155093,ENSG00000171100,ENSG00000173482	MTMR3,MTMR4,SSH2,PTPRN2,MTM1,PTPRM
GO:0098732	0.0360637	2.56904	2.4465	6	99	macromolecule deacylation	0.224634	ENSG00000048052,ENSG00000076108,ENSG00000089163,ENSG00000111707,ENSG00000113916,ENSG00000132326	HDAC9,BAZ2A,SIRT4,SUDS3,BCL6,PER2
GO:0030163	0.0361566	1.48098	19.5473	28	791	protein catabolic process	0.22491	ENSG00000068912,ENSG00000072062,ENSG00000073969,ENSG00000077232,ENSG00000102580,ENSG00000102910,ENSG00000103429,ENSG00000107185,ENSG00000110330,ENSG00000113441,ENSG00000114316,ENSG00000116406,ENSG00000119541,ENSG00000135093,ENSG00000137486,ENSG00000138641,ENSG00000150907,ENSG00000151148,ENSG00000155313,ENSG00000158290,ENSG00000160695,ENSG00000170185,ENSG00000171100,ENSG00000181191,ENSG00000186591…	ERLEC1,PRKACA,NSF,DNAJC10,DNAJC3,LONP2,BFAR,RGP1,BIRC2,LNPEP,USP4,EDEM3,VPS4B,USP30,ARRB1,HERC3,FOXO1,UBE3B,USP25,CUL4B,VPS11,USP38,MTM1,PJA1,UBE2H,CD2AP,BAG6,OTUD7B
GO:0045666	0.0362168	1.81332	7.41363	13	300	positive regulation of neuron differentiation	0.224982	ENSG00000008086,ENSG00000106078,ENSG00000107263,ENSG00000113916,ENSG00000124333,ENSG00000127603,ENSG00000130779,ENSG00000134313,ENSG00000145868,ENSG00000158092,ENSG00000173376,ENSG00000198399,ENSG00000274286	CDKL5,COBL,RAPGEF1,BCL6,VAMP7,MACF1,CLIP1,KIDINS220,FBXO38,NCK1,NDNF,ITSN2,ADRA2B
GO:0032101	0.0365774	1.51493	17.0513	25	690	regulation of response to external stimulus	0.226917	ENSG00000001561,ENSG00000064201,ENSG00000075223,ENSG00000082196,ENSG00000088888,ENSG00000100280,ENSG00000110330,ENSG00000111199,ENSG00000113916,ENSG00000115594,ENSG00000121236,ENSG00000124333,ENSG00000125124,ENSG00000129657,ENSG00000130164,ENSG00000138032,ENSG00000140463,ENSG00000159842,ENSG00000165929,ENSG00000166747,ENSG00000175115,ENSG00000186716,ENSG00000186951,ENSG00000197256,ENSG00000198959	ENPP4,TSPAN32,SEMA3C,C1QTNF3,MAVS,AP1B1,BIRC2,TRPV4,BCL6,IL1R1,TRIM6,VAMP7,BBS2,SEC14L1,LDLR,PPM1B,BBS4,ABR,TC2N,AP1G1,PACS1,BCR,PPARA,KANK2,TGM2
GO:0030155	0.0366467	1.54319	15.3956	23	623	regulation of cell adhesion	0.227043	ENSG00000051382,ENSG00000075711,ENSG00000108946,ENSG00000111199,ENSG00000111348,ENSG00000111846,ENSG00000113916,ENSG00000121879,ENSG00000127603,ENSG00000132589,ENSG00000141503,ENSG00000141736,ENSG00000145715,ENSG00000150760,ENSG00000158092,ENSG00000161905,ENSG00000164442,ENSG00000165699,ENSG00000171132,ENSG00000173376,ENSG00000186951,ENSG00000198959,ENSG00000248905	PIK3CB,DLG1,PRKAR1A,TRPV4,ARHGDIB,GCNT2,BCL6,PIK3CA,MACF1,FLOT2,MINK1,ERBB2,RASA1,DOCK1,NCK1,ALOX15,CITED2,TSC1,PRKCE,NDNF,PPARA,TGM2,FMN1
GO:0002683	0.0368281	1.72761	8.97049	15	363	negative regulation of immune system process	0.227407	ENSG00000064201,ENSG00000075711,ENSG00000106299,ENSG00000108946,ENSG00000112851,ENSG00000113916,ENSG00000129657,ENSG00000138032,ENSG00000141736,ENSG00000151422,ENSG00000159842,ENSG00000161905,ENSG00000170458,ENSG00000186716,ENSG00000205213	TSPAN32,DLG1,WASL,PRKAR1A,ERBB2IP,BCL6,SEC14L1,PPM1B,ERBB2,FER,ABR,ALOX15,CD14,BCR,LGR4
GO:0001885	0.0369331	3.38194	1.26032	4	51	endothelial cell development	0.227407	ENSG00000107263,ENSG00000119139,ENSG00000130396,ENSG00000152939	RAPGEF1,TJP2,MLLT4,MARVELD2
GO:0006482	0.0371478	4.40994	0.741363	3	30	protein demethylation	0.227407	ENSG00000107077,ENSG00000117139,ENSG00000172943	KDM4C,KDM5B,PHF8
GO:0008214	0.0371478	4.40994	0.741363	3	30	protein dealkylation	0.227407	ENSG00000107077,ENSG00000117139,ENSG00000172943	KDM4C,KDM5B,PHF8
GO:0032456	0.0371478	4.40994	0.741363	3	30	endocytic recycling	0.227407	ENSG00000085832,ENSG00000119396,ENSG00000141252	EPS15,RAB14,VPS53
GO:0034142	0.0371478	4.40994	0.741363	3	30	toll-like receptor 4 signaling pathway	0.227407	ENSG00000160255,ENSG00000170458,ENSG00000171132	ITGB2,CD14,PRKCE
GO:0036258	0.0371478	4.40994	0.741363	3	30	multivesicular body assembly	0.227407	ENSG00000115145,ENSG00000115561,ENSG00000119541	STAM2,CHMP3,VPS4B
GO:1902186	0.0371478	4.40994	0.741363	3	30	regulation of viral release from host cell	0.227407	ENSG00000080561,ENSG00000115561,ENSG00000119541	MID2,CHMP3,VPS4B
GO:1903335	0.0371478	4.40994	0.741363	3	30	regulation of vacuolar transport	0.227407	ENSG00000115561,ENSG00000124333,ENSG00000160695	CHMP3,VAMP7,VPS11
GO:0061138	0.0372709	2.07666	4.4976	9	182	morphogenesis of a branching epithelium	0.227574	ENSG00000075223,ENSG00000075711,ENSG00000111424,ENSG00000117139,ENSG00000136158,ENSG00000149418,ENSG00000164056,ENSG00000198959,ENSG00000205213	SEMA3C,DLG1,VDR,KDM5B,SPRY2,ST14,SPRY1,TGM2,LGR4
GO:0043406	0.0372734	1.98745	5.21425	10	211	positive regulation of MAP kinase activity	0.227574	ENSG00000051382,ENSG00000132356,ENSG00000135090,ENSG00000137486,ENSG00000138193,ENSG00000141736,ENSG00000157625,ENSG00000170776,ENSG00000197442,ENSG00000274286	PIK3CB,PRKAA1,TAOK3,ARRB1,PLCE1,ERBB2,TAB3,AKAP13,MAP3K5,ADRA2B
GO:0042060	0.0374672	1.59174	12.9738	20	525	wound healing	0.228456	ENSG00000001561,ENSG00000051382,ENSG00000064201,ENSG00000072062,ENSG00000108946,ENSG00000121879,ENSG00000127603,ENSG00000136854,ENSG00000137486,ENSG00000141736,ENSG00000142875,ENSG00000150760,ENSG00000161905,ENSG00000165929,ENSG00000168310,ENSG00000171132,ENSG00000173376,ENSG00000186951,ENSG00000197442,ENSG00000274286	ENPP4,PIK3CB,TSPAN32,PRKACA,PRKAR1A,PIK3CA,MACF1,STXBP1,ARRB1,ERBB2,PRKACB,DOCK1,ALOX15,TC2N,IRF2,PRKCE,NDNF,PPARA,MAP3K5,ADRA2B
GO:0017156	0.037601	2.54156	2.47121	6	100	calcium ion regulated exocytosis	0.22897	ENSG00000006747,ENSG00000115839,ENSG00000124333,ENSG00000136854,ENSG00000159082,ENSG00000198722	SCIN,RAB3GAP1,VAMP7,STXBP1,SYNJ1,UNC13B
GO:0043933	0.0378561	1.28013	58.8148	72	2380	macromolecular complex subunit organization	0.230221	ENSG00000006747,ENSG00000048052,ENSG00000052795,ENSG00000055609,ENSG00000073969,ENSG00000075711,ENSG00000076108,ENSG00000082196,ENSG00000085832,ENSG00000089163,ENSG00000106078,ENSG00000106299,ENSG00000107077,ENSG00000110330,ENSG00000111199,ENSG00000111707,ENSG00000113282,ENSG00000113615,ENSG00000113916,ENSG00000114166,ENSG00000114316,ENSG00000115561,ENSG00000117139,ENSG00000119541,ENSG00000120868…	SCIN,HDAC9,FNIP2,KMT2C,NSF,DLG1,BAZ2A,C1QTNF3,EPS15,SIRT4,COBL,WASL,KDM4C,BIRC2,TRPV4,SUDS3,CLINT1,SEC24A,BCL6,KAT2B,USP4,CHMP3,KDM5B,VPS4B,APAF1,TRIM6,NCOA3,VAMP7,CLIP1,PER2,PRKAA1,SETDB2,KCTD3,STXBP1,ARRB1,TMOD3,LNX2,BBS4,LIMD1,RASA1,MAGI1,FER,EPS8,SLC7A7,BRE,NCK1,CUL4B,SYNJ1,VPS11,ALOX15,ARFIP1,TSC1,MECP2,TMED10,KCNS3,PRKCE,EIF2AK3,PHF8,TADA2B,CHD2,SPTBN2,SEPT9,SMYD3,BCL9L,NBR1,CD2AP,ATL1,UNC1…
GO:0019222	0.0379467	1.20489	149.31	167	6042	regulation of metabolic process	0.230469	ENSG00000004799,ENSG00000005882,ENSG00000006468,ENSG00000007237,ENSG00000048052,ENSG00000051382,ENSG00000052795,ENSG00000055609,ENSG00000068912,ENSG00000071242,ENSG00000072062,ENSG00000073969,ENSG00000075711,ENSG00000076108,ENSG00000077232,ENSG00000078687,ENSG00000080561,ENSG00000082196,ENSG00000084234,ENSG00000085832,ENSG00000088888,ENSG00000089163,ENSG00000092330,ENSG00000100665,ENSG00000102471…	PDK4,PDK2,ETV1,GAS7,HDAC9,PIK3CB,FNIP2,KMT2C,ERLEC1,RPS6KA2,PRKACA,NSF,DLG1,BAZ2A,DNAJC10,TNRC6C,MID2,C1QTNF3,APLP2,EPS15,MAVS,SIRT4,TINF2,SERPINA4,NDFIP2,DNAJC3,LONP2,ITGB8,TAX1BP1,WASL,KDM4C,RGP1,RAPGEF1,ZMIZ1,RAI1,PRKAR1A,BIRC2,TRPV4,VDR,SUDS3,HCFC2,GCNT2,ERBB2IP,SEC24A,BCL6,KAT2B,USP4,EFEMP1,RAB3GAP1,DHCR24,LEPR,ETV3,KDM5B,PIK3R3,RCOR3,ANKRD13C,IRF2BPL,HOXB5,APAF1,TRIM6,PIK3CA,NCOA3,BBS2,HIVE…
GO:0031400	0.038103	1.56952	13.8141	21	559	negative regulation of protein modification process	0.230911	ENSG00000075711,ENSG00000077232,ENSG00000092330,ENSG00000102580,ENSG00000107263,ENSG00000108946,ENSG00000114166,ENSG00000114316,ENSG00000132326,ENSG00000135090,ENSG00000136158,ENSG00000137486,ENSG00000146674,ENSG00000150907,ENSG00000153721,ENSG00000155792,ENSG00000158092,ENSG00000164056,ENSG00000169057,ENSG00000171132,ENSG00000185420	DLG1,DNAJC10,TINF2,DNAJC3,RAPGEF1,PRKAR1A,KAT2B,USP4,PER2,TAOK3,SPRY2,ARRB1,IGFBP3,FOXO1,CNKSR3,DEPTOR,NCK1,SPRY1,MECP2,PRKCE,SMYD3
GO:0048468	0.0381192	1.31444	45.149	57	1827	cell development	0.230911	ENSG00000006468,ENSG00000008086,ENSG00000048052,ENSG00000071242,ENSG00000072062,ENSG00000075223,ENSG00000104133,ENSG00000105738,ENSG00000106078,ENSG00000107263,ENSG00000107731,ENSG00000108946,ENSG00000111199,ENSG00000113916,ENSG00000119139,ENSG00000124333,ENSG00000125124,ENSG00000127603,ENSG00000130396,ENSG00000130779,ENSG00000132326,ENSG00000133961,ENSG00000134313,ENSG00000136854,ENSG00000138594…	ETV1,CDKL5,HDAC9,RPS6KA2,PRKACA,SEMA3C,SPG11,SIPA1L3,COBL,RAPGEF1,UNC5B,PRKAR1A,TRPV4,BCL6,TJP2,VAMP7,BBS2,MACF1,MLLT4,CLIP1,PER2,NUMB,KIDINS220,STXBP1,TMOD3,BMPR1B,BBS4,SSH2,MINK1,ERBB2,LIMD1,FBXO38,ST14,DOCK1,PIP4K2A,FER,MARVELD2,CXADR,NCK1,WASF2,CUL4B,PDLIM5,MECP2,AKAP13,EIF2AK3,NDNF,PTPRM,SPTBN2,NR2F1,NCMAP,MED12,SMYD3,ITSN2,ATL1,FMN1,CYFIP1,ADRA2B
GO:0001818	0.0382977	1.97749	5.23896	10	212	negative regulation of cytokine production	0.231688	ENSG00000082196,ENSG00000088888,ENSG00000106052,ENSG00000112851,ENSG00000113916,ENSG00000137486,ENSG00000138032,ENSG00000198087,ENSG00000205213,ENSG00000264522	C1QTNF3,MAVS,TAX1BP1,ERBB2IP,BCL6,ARRB1,PPM1B,CD2AP,LGR4,OTUD7B
GO:1903507	0.0385385	1.39214	28.2706	38	1144	negative regulation of nucleic acid-templated transcription	0.231949	ENSG00000048052,ENSG00000052795,ENSG00000075711,ENSG00000076108,ENSG00000089163,ENSG00000111199,ENSG00000111424,ENSG00000111707,ENSG00000111727,ENSG00000113916,ENSG00000117036,ENSG00000117139,ENSG00000117625,ENSG00000119669,ENSG00000121236,ENSG00000132326,ENSG00000136169,ENSG00000144791,ENSG00000150907,ENSG00000151090,ENSG00000153814,ENSG00000158092,ENSG00000164442,ENSG00000165156,ENSG00000166135…	HDAC9,FNIP2,DLG1,BAZ2A,SIRT4,TRPV4,VDR,SUDS3,HCFC2,BCL6,ETV3,KDM5B,RCOR3,IRF2BPL,TRIM6,PER2,SETDB2,LIMD1,FOXO1,THRB,JAZF1,NCK1,CITED2,ZHX1,HIF1AN,IRF2,MECP2,ZNF217,PHF8,NR2F1,ZFP90,PPARA,MPHOSPH8,STRN3,KANK2,SREBF2,LGR4,OTUD7B
GO:0001944	0.0385875	1.54995	14.6543	22	593	vasculature development	0.231949	ENSG00000005108,ENSG00000048052,ENSG00000051382,ENSG00000075223,ENSG00000105855,ENSG00000107263,ENSG00000107731,ENSG00000108175,ENSG00000115234,ENSG00000116678,ENSG00000121879,ENSG00000140199,ENSG00000141736,ENSG00000145715,ENSG00000150907,ENSG00000158195,ENSG00000160255,ENSG00000162434,ENSG00000166135,ENSG00000172071,ENSG00000173376,ENSG00000173482	THSD7A,HDAC9,PIK3CB,SEMA3C,ITGB8,RAPGEF1,UNC5B,ZMIZ1,SNX17,LEPR,PIK3CA,SLC12A6,ERBB2,RASA1,FOXO1,WASF2,ITGB2,JAK1,HIF1AN,EIF2AK3,NDNF,PTPRM
GO:0009894	0.0385995	1.60662	12.2078	19	494	regulation of catabolic process	0.231949	ENSG00000068912,ENSG00000072062,ENSG00000073969,ENSG00000078687,ENSG00000102910,ENSG00000107185,ENSG00000120868,ENSG00000130164,ENSG00000132356,ENSG00000150907,ENSG00000155313,ENSG00000158290,ENSG00000160695,ENSG00000171100,ENSG00000171132,ENSG00000173281,ENSG00000182782,ENSG00000186951,ENSG00000204463	ERLEC1,PRKACA,NSF,TNRC6C,LONP2,RGP1,APAF1,LDLR,PRKAA1,FOXO1,USP25,CUL4B,VPS11,MTM1,PRKCE,PPP1R3B,HCAR2,PPARA,BAG6
GO:0042221	0.0386407	1.22756	99.1943	115	4014	response to chemical	0.231949	ENSG00000004799,ENSG00000005882,ENSG00000006468,ENSG00000008952,ENSG00000019186,ENSG00000025796,ENSG00000046604,ENSG00000048052,ENSG00000051382,ENSG00000068912,ENSG00000071242,ENSG00000072062,ENSG00000075223,ENSG00000077232,ENSG00000088888,ENSG00000089163,ENSG00000091317,ENSG00000102580,ENSG00000102699,ENSG00000102910,ENSG00000103429,ENSG00000104549,ENSG00000106052,ENSG00000107263,ENSG00000107731…	PDK4,PDK2,ETV1,SEC62,CYP24A1,SEC63,DSG2,HDAC9,PIK3CB,ERLEC1,RPS6KA2,PRKACA,SEMA3C,DNAJC10,MAVS,SIRT4,CMTM6,DNAJC3,PARP4,LONP2,BFAR,SQLE,TAX1BP1,RAPGEF1,UNC5B,GBF1,MTMR4,PRKAR1A,IL10RA,BIRC2,TRPV4,VDR,GCNT2,ERBB2IP,KAT2B,ACAP2,PLSCR4,GALNT3,IL1R1,SLC25A12,DHCR24,EDEM3,LEPR,ETV3,KDM5B,PIK3R3,RAB14,CSF3R,VPS4B,APAF1,TRIM6,PIK3CA,NCOA3,BBS2,LDLR,PRKAA1,KIDINS220,SPRY2,ARRB1,BMPR1B,FBLN5,BBS4,CPNE2,ER…
GO:0043549	0.0387694	1.48131	18.8306	27	762	regulation of kinase activity	0.231949	ENSG00000051382,ENSG00000072062,ENSG00000075711,ENSG00000102580,ENSG00000107263,ENSG00000108946,ENSG00000114166,ENSG00000117461,ENSG00000121879,ENSG00000131653,ENSG00000132356,ENSG00000134313,ENSG00000135090,ENSG00000136158,ENSG00000137486,ENSG00000138193,ENSG00000141736,ENSG00000142875,ENSG00000155792,ENSG00000157625,ENSG00000158092,ENSG00000164056,ENSG00000165699,ENSG00000170776,ENSG00000185420…	PIK3CB,PRKACA,DLG1,DNAJC3,RAPGEF1,PRKAR1A,KAT2B,PIK3R3,PIK3CA,TRAF7,PRKAA1,KIDINS220,TAOK3,SPRY2,ARRB1,PLCE1,ERBB2,PRKACB,DEPTOR,TAB3,NCK1,SPRY1,TSC1,AKAP13,SMYD3,MAP3K5,ADRA2B
GO:0003018	0.0388659	2.17054	3.83037	8	155	vascular process in circulatory system	0.231949	ENSG00000111199,ENSG00000125124,ENSG00000132326,ENSG00000159842,ENSG00000165895,ENSG00000173482,ENSG00000186716,ENSG00000274286	TRPV4,BBS2,PER2,ABR,ARHGAP42,PTPRM,BCR,ADRA2B
GO:0071417	0.0389872	1.62738	11.417	18	462	cellular response to organonitrogen compound	0.231949	ENSG00000004799,ENSG00000005882,ENSG00000048052,ENSG00000072062,ENSG00000107263,ENSG00000108946,ENSG00000114166,ENSG00000117461,ENSG00000121879,ENSG00000132356,ENSG00000142875,ENSG00000150907,ENSG00000151422,ENSG00000165699,ENSG00000166263,ENSG00000168710,ENSG00000185591,ENSG00000204406	PDK4,PDK2,HDAC9,PRKACA,RAPGEF1,PRKAR1A,KAT2B,PIK3R3,PIK3CA,PRKAA1,PRKACB,FOXO1,FER,TSC1,STXBP4,AHCYL1,SP1,MBD5
GO:0048666	0.039136	1.43214	23.1058	32	935	neuron development	0.231949	ENSG00000006468,ENSG00000008086,ENSG00000075223,ENSG00000104133,ENSG00000106078,ENSG00000107263,ENSG00000107731,ENSG00000111199,ENSG00000124333,ENSG00000127603,ENSG00000130779,ENSG00000133961,ENSG00000134313,ENSG00000136854,ENSG00000138696,ENSG00000140463,ENSG00000141298,ENSG00000141503,ENSG00000141736,ENSG00000145868,ENSG00000158092,ENSG00000158290,ENSG00000163110,ENSG00000169057,ENSG00000173376…	ETV1,CDKL5,SEMA3C,SPG11,COBL,RAPGEF1,UNC5B,TRPV4,VAMP7,MACF1,CLIP1,NUMB,KIDINS220,STXBP1,BMPR1B,BBS4,SSH2,MINK1,ERBB2,FBXO38,NCK1,CUL4B,PDLIM5,MECP2,NDNF,PTPRM,SPTBN2,NR2F1,ITSN2,ATL1,FMN1,CYFIP1
GO:0018193	0.0392319	1.38415	29.185	39	1181	peptidyl-amino acid modification	0.231949	ENSG00000048052,ENSG00000052795,ENSG00000055609,ENSG00000071242,ENSG00000072062,ENSG00000089163,ENSG00000100271,ENSG00000102158,ENSG00000104723,ENSG00000114166,ENSG00000115339,ENSG00000115380,ENSG00000121236,ENSG00000121879,ENSG00000124151,ENSG00000127334,ENSG00000132356,ENSG00000136158,ENSG00000136169,ENSG00000137486,ENSG00000141736,ENSG00000151422,ENSG00000153721,ENSG00000158092,ENSG00000159256…	HDAC9,FNIP2,KMT2C,RPS6KA2,PRKACA,SIRT4,TTLL1,MAGT1,TUSC3,KAT2B,GALNT3,EFEMP1,TRIM6,PIK3CA,NCOA3,DYRK2,PRKAA1,SPRY2,SETDB2,ARRB1,ERBB2,FER,CNKSR3,NCK1,MORC3,ITGB2,JAK1,HIF1AN,MECP2,PRKCE,EIF2AK3,TADA2B,NDNF,SMYD3,BCR,ASPH,TGM2,BAG6,ADRA2B
GO:0030042	0.0392595	3.31127	1.28503	4	52	actin filament depolymerization	0.231949	ENSG00000006747,ENSG00000138594,ENSG00000151491,ENSG00000173898	SCIN,TMOD3,EPS8,SPTBN2
GO:0051193	0.0392595	3.31127	1.28503	4	52	regulation of cofactor metabolic process	0.231949	ENSG00000004799,ENSG00000005882,ENSG00000132356,ENSG00000186951	PDK4,PDK2,PRKAA1,PPARA
GO:0051196	0.0392595	3.31127	1.28503	4	52	regulation of coenzyme metabolic process	0.231949	ENSG00000004799,ENSG00000005882,ENSG00000132356,ENSG00000186951	PDK4,PDK2,PRKAA1,PPARA
GO:0010975	0.0392879	1.67941	9.83541	16	398	regulation of neuron projection development	0.231949	ENSG00000008086,ENSG00000075223,ENSG00000106078,ENSG00000107263,ENSG00000111199,ENSG00000124333,ENSG00000127603,ENSG00000130779,ENSG00000134313,ENSG00000141298,ENSG00000145868,ENSG00000158092,ENSG00000163110,ENSG00000173376,ENSG00000175745,ENSG00000198399	CDKL5,SEMA3C,COBL,RAPGEF1,TRPV4,VAMP7,MACF1,CLIP1,KIDINS220,SSH2,FBXO38,NCK1,PDLIM5,NDNF,NR2F1,ITSN2
GO:0065003	0.0396427	1.32623	40.7502	52	1649	macromolecular complex assembly	0.231949	ENSG00000006747,ENSG00000052795,ENSG00000073969,ENSG00000075711,ENSG00000082196,ENSG00000085832,ENSG00000106078,ENSG00000106299,ENSG00000110330,ENSG00000111199,ENSG00000113282,ENSG00000113615,ENSG00000114316,ENSG00000115561,ENSG00000120868,ENSG00000121236,ENSG00000124333,ENSG00000130779,ENSG00000132356,ENSG00000136636,ENSG00000136854,ENSG00000138594,ENSG00000139517,ENSG00000140463,ENSG00000144791…	SCIN,FNIP2,NSF,DLG1,C1QTNF3,EPS15,COBL,WASL,BIRC2,TRPV4,CLINT1,SEC24A,USP4,CHMP3,APAF1,TRIM6,VAMP7,CLIP1,PRKAA1,KCTD3,STXBP1,TMOD3,LNX2,BBS4,LIMD1,RASA1,MAGI1,FER,EPS8,SLC7A7,NCK1,CUL4B,SYNJ1,VPS11,ALOX15,ARFIP1,TSC1,TMED10,KCNS3,PRKCE,EIF2AK3,SPTBN2,SEPT9,SMYD3,BCL9L,NBR1,CD2AP,ATL1,UNC13B,TGM2,FMN1,CYFIP1
GO:0001921	0.039694	7.20576	0.321257	2	13	positive regulation of receptor recycling	0.231949	ENSG00000073969,ENSG00000085832	NSF,EPS15
GO:0010885	0.039694	7.20576	0.321257	2	13	regulation of cholesterol storage	0.231949	ENSG00000186951,ENSG00000198911	PPARA,SREBF2
GO:0035025	0.039694	7.20576	0.321257	2	13	positive regulation of Rho protein signal transduction	0.231949	ENSG00000137486,ENSG00000170776	ARRB1,AKAP13
GO:0045618	0.039694	7.20576	0.321257	2	13	positive regulation of keratinocyte differentiation	0.231949	ENSG00000111424,ENSG00000124151	VDR,NCOA3
GO:0045721	0.039694	7.20576	0.321257	2	13	negative regulation of gluconeogenesis	0.231949	ENSG00000082196,ENSG00000116678	C1QTNF3,LEPR
GO:0046710	0.039694	7.20576	0.321257	2	13	GDP metabolic process	0.231949	ENSG00000075711,ENSG00000119139	DLG1,TJP2
GO:0048268	0.039694	7.20576	0.321257	2	13	clathrin coat assembly	0.231949	ENSG00000085832,ENSG00000113282	EPS15,CLINT1
GO:0050812	0.039694	7.20576	0.321257	2	13	regulation of acyl-CoA biosynthetic process	0.231949	ENSG00000004799,ENSG00000005882	PDK4,PDK2
GO:0055098	0.039694	7.20576	0.321257	2	13	response to low-density lipoprotein particle	0.231949	ENSG00000160255,ENSG00000198911	ITGB2,SREBF2
GO:0060831	0.039694	7.20576	0.321257	2	13	smoothened signaling pathway involved in dorsal/ventral neural tube patterning	0.231949	ENSG00000072062,ENSG00000142875	PRKACA,PRKACB
GO:0071361	0.039694	7.20576	0.321257	2	13	cellular response to ethanol	0.231949	ENSG00000132356,ENSG00000171132	PRKAA1,PRKCE
GO:1902991	0.039694	7.20576	0.321257	2	13	regulation of amyloid precursor protein catabolic process	0.231949	ENSG00000132589,ENSG00000170348	FLOT2,TMED10
GO:1903672	0.039694	7.20576	0.321257	2	13	positive regulation of sprouting angiogenesis	0.231949	ENSG00000048052,ENSG00000162434	HDAC9,JAK1
GO:0045921	0.0398509	2.80116	1.87812	5	76	positive regulation of exocytosis	0.23228	ENSG00000119541,ENSG00000124333,ENSG00000136854,ENSG00000166747,ENSG00000198722	VPS4B,VAMP7,STXBP1,AP1G1,UNC13B
GO:0090630	0.0398509	2.80116	1.87812	5	76	activation of GTPase activity	0.23228	ENSG00000108239,ENSG00000165699,ENSG00000167202,ENSG00000198863,ENSG00000204634	TBC1D12,TSC1,TBC1D2B,RUNDC1,TBC1D8
GO:0019216	0.0402668	1.83183	6.77111	12	274	regulation of lipid metabolic process	0.233989	ENSG00000004799,ENSG00000005882,ENSG00000089163,ENSG00000102910,ENSG00000111424,ENSG00000117461,ENSG00000130164,ENSG00000132356,ENSG00000140463,ENSG00000171132,ENSG00000182782,ENSG00000186951	PDK4,PDK2,SIRT4,LONP2,VDR,PIK3R3,LDLR,PRKAA1,BBS4,PRKCE,HCAR2,PPARA
GO:0001934	0.0402914	1.44529	21.4501	30	868	positive regulation of protein phosphorylation	0.233989	ENSG00000051382,ENSG00000052795,ENSG00000072062,ENSG00000075711,ENSG00000088888,ENSG00000107263,ENSG00000108946,ENSG00000111199,ENSG00000111846,ENSG00000121236,ENSG00000121879,ENSG00000131653,ENSG00000132356,ENSG00000134313,ENSG00000135090,ENSG00000136158,ENSG00000137486,ENSG00000138193,ENSG00000139946,ENSG00000141503,ENSG00000141736,ENSG00000142875,ENSG00000146674,ENSG00000157625,ENSG00000161905…	PIK3CB,FNIP2,PRKACA,DLG1,MAVS,RAPGEF1,PRKAR1A,TRPV4,GCNT2,TRIM6,PIK3CA,TRAF7,PRKAA1,KIDINS220,TAOK3,SPRY2,ARRB1,PLCE1,PELI2,MINK1,ERBB2,PRKACB,IGFBP3,TAB3,ALOX15,AKAP13,PRKCE,SMYD3,MAP3K5,ADRA2B
GO:0002756	0.040397	4.25218	0.766075	3	31	MyD88-independent toll-like receptor signaling pathway	0.233989	ENSG00000110330,ENSG00000170458,ENSG00000171132	BIRC2,CD14,PRKCE
GO:0003401	0.040397	4.25218	0.766075	3	31	axis elongation	0.233989	ENSG00000136158,ENSG00000164056,ENSG00000184634	SPRY2,SPRY1,MED12
GO:0036257	0.040397	4.25218	0.766075	3	31	multivesicular body organization	0.233989	ENSG00000115145,ENSG00000115561,ENSG00000119541	STAM2,CHMP3,VPS4B
GO:0010811	0.0407995	2.4883	2.52063	6	102	positive regulation of cell-substrate adhesion	0.23573	ENSG00000150760,ENSG00000161905,ENSG00000165699,ENSG00000171132,ENSG00000173376,ENSG00000248905	DOCK1,ALOX15,TSC1,PRKCE,NDNF,FMN1
GO:0048525	0.0407995	2.4883	2.52063	6	102	negative regulation of viral process	0.23573	ENSG00000080561,ENSG00000088888,ENSG00000115561,ENSG00000121236,ENSG00000129657,ENSG00000138032	MID2,MAVS,CHMP3,TRIM6,SEC14L1,PPM1B
GO:0071822	0.0408894	1.32653	39.9347	51	1616	protein complex subunit organization	0.235955	ENSG00000006747,ENSG00000052795,ENSG00000073969,ENSG00000075711,ENSG00000082196,ENSG00000085832,ENSG00000106078,ENSG00000106299,ENSG00000110330,ENSG00000111199,ENSG00000113282,ENSG00000113615,ENSG00000115561,ENSG00000119541,ENSG00000120868,ENSG00000121236,ENSG00000124333,ENSG00000130779,ENSG00000132356,ENSG00000136636,ENSG00000136854,ENSG00000138594,ENSG00000139517,ENSG00000140463,ENSG00000145715…	SCIN,FNIP2,NSF,DLG1,C1QTNF3,EPS15,COBL,WASL,BIRC2,TRPV4,CLINT1,SEC24A,CHMP3,VPS4B,APAF1,TRIM6,VAMP7,CLIP1,PRKAA1,KCTD3,STXBP1,TMOD3,LNX2,BBS4,RASA1,MAGI1,FER,EPS8,SLC7A7,NCK1,CUL4B,SYNJ1,VPS11,ALOX15,ARFIP1,TSC1,TMED10,KCNS3,PRKCE,EIF2AK3,SPTBN2,SEPT9,SMYD3,BCL9L,NBR1,CD2AP,ATL1,UNC13B,TGM2,FMN1,CYFIP1
GO:0010604	0.0412863	1.25687	68.3536	82	2766	positive regulation of macromolecule metabolic process	0.237949	ENSG00000006468,ENSG00000051382,ENSG00000052795,ENSG00000071242,ENSG00000072062,ENSG00000073969,ENSG00000075711,ENSG00000078687,ENSG00000085832,ENSG00000088888,ENSG00000092330,ENSG00000102471,ENSG00000102580,ENSG00000105855,ENSG00000107263,ENSG00000108175,ENSG00000108557,ENSG00000108946,ENSG00000110330,ENSG00000111199,ENSG00000111424,ENSG00000111846,ENSG00000113916,ENSG00000114166,ENSG00000115839…	ETV1,PIK3CB,FNIP2,RPS6KA2,PRKACA,NSF,DLG1,TNRC6C,EPS15,MAVS,TINF2,NDFIP2,DNAJC3,ITGB8,RAPGEF1,ZMIZ1,RAI1,PRKAR1A,BIRC2,TRPV4,VDR,GCNT2,BCL6,KAT2B,RAB3GAP1,KDM5B,IRF2BPL,HOXB5,APAF1,TRIM6,PIK3CA,NCOA3,HIVEP3,DYRK2,LDLR,TRAF7,PRKAA1,KIDINS220,TAOK3,SPRY2,ARRB1,PLCE1,BMPR1B,PELI2,MINK1,ERBB2,PRKACB,IGFBP3,FOXO1,THRB,TAB3,BRE,NCK1,CUL4B,VPS11,ALOX15,CITED2,IRF2,MECP2,PARM1,AKAP13,PRKCE,EIF2AK3,PHF8,T…
GO:2000242	0.0416677	3.2435	1.30974	4	53	negative regulation of reproductive process	0.238811	ENSG00000071242,ENSG00000108946,ENSG00000111348,ENSG00000142875	RPS6KA2,PRKAR1A,ARHGDIB,PRKACB
GO:0042552	0.0424613	2.4625	2.54535	6	103	myelination	0.238811	ENSG00000075711,ENSG00000141736,ENSG00000165699,ENSG00000172071,ENSG00000184454,ENSG00000197971	DLG1,ERBB2,TSC1,EIF2AK3,NCMAP,MBP
GO:0055002	0.042598	2.26757	3.21257	7	130	striated muscle cell development	0.238811	ENSG00000048052,ENSG00000108946,ENSG00000138594,ENSG00000154639,ENSG00000163110,ENSG00000170776,ENSG00000185420	HDAC9,PRKAR1A,TMOD3,CXADR,PDLIM5,AKAP13,SMYD3
GO:0046883	0.0426228	1.87059	6.07917	11	246	regulation of hormone secretion	0.238811	ENSG00000082196,ENSG00000089163,ENSG00000124333,ENSG00000132326,ENSG00000137486,ENSG00000156675,ENSG00000166263,ENSG00000170745,ENSG00000171132,ENSG00000182782,ENSG00000274286	C1QTNF3,SIRT4,VAMP7,PER2,ARRB1,RAB11FIP1,STXBP4,KCNS3,PRKCE,HCAR2,ADRA2B
GO:0072358	0.0429503	1.53049	14.8273	22	600	cardiovascular system development	0.238811	ENSG00000005108,ENSG00000048052,ENSG00000051382,ENSG00000075223,ENSG00000105855,ENSG00000107263,ENSG00000107731,ENSG00000108175,ENSG00000115234,ENSG00000116678,ENSG00000121879,ENSG00000140199,ENSG00000141736,ENSG00000145715,ENSG00000150907,ENSG00000158195,ENSG00000160255,ENSG00000162434,ENSG00000166135,ENSG00000172071,ENSG00000173376,ENSG00000173482	THSD7A,HDAC9,PIK3CB,SEMA3C,ITGB8,RAPGEF1,UNC5B,ZMIZ1,SNX17,LEPR,PIK3CA,SLC12A6,ERBB2,RASA1,FOXO1,WASF2,ITGB2,JAK1,HIF1AN,EIF2AK3,NDNF,PTPRM
GO:0001666	0.0431388	1.81075	6.84525	12	277	response to hypoxia	0.238811	ENSG00000089163,ENSG00000110330,ENSG00000120868,ENSG00000132356,ENSG00000144791,ENSG00000149428,ENSG00000164442,ENSG00000166135,ENSG00000169057,ENSG00000171132,ENSG00000173376,ENSG00000186951	SIRT4,BIRC2,APAF1,PRKAA1,LIMD1,HYOU1,CITED2,HIF1AN,MECP2,PRKCE,NDNF,PPARA
GO:0033280	0.043785	4.1053	0.790787	3	32	response to vitamin D	0.238811	ENSG00000019186,ENSG00000111424,ENSG00000197256	CYP24A1,VDR,KANK2
GO:0035058	0.043785	4.1053	0.790787	3	32	nonmotile primary cilium assembly	0.238811	ENSG00000125124,ENSG00000140463,ENSG00000184640	BBS2,BBS4,SEPT9
GO:0040018	0.043785	4.1053	0.790787	3	32	positive regulation of multicellular organism growth	0.238811	ENSG00000120756,ENSG00000125124,ENSG00000140463	PLS1,BBS2,BBS4
GO:0019217	0.0437863	2.72408	1.92754	5	78	regulation of fatty acid metabolic process	0.238811	ENSG00000004799,ENSG00000005882,ENSG00000089163,ENSG00000102910,ENSG00000186951	PDK4,PDK2,SIRT4,LONP2,PPARA
GO:0007409	0.0439728	1.65282	9.98369	16	404	axonogenesis	0.238811	ENSG00000006468,ENSG00000008086,ENSG00000075223,ENSG00000104133,ENSG00000106078,ENSG00000107731,ENSG00000127603,ENSG00000133961,ENSG00000136854,ENSG00000138696,ENSG00000141298,ENSG00000141736,ENSG00000173482,ENSG00000173898,ENSG00000198513,ENSG00000273749	ETV1,CDKL5,SEMA3C,SPG11,COBL,UNC5B,MACF1,NUMB,STXBP1,BMPR1B,SSH2,ERBB2,PTPRM,SPTBN2,ATL1,CYFIP1
GO:0035773	0.0441577	3.17843	1.33445	4	54	insulin secretion involved in cellular response to glucose stimulus	0.238811	ENSG00000137486,ENSG00000155093,ENSG00000166263,ENSG00000171132	ARRB1,PTPRN2,STXBP4,PRKCE
GO:1901699	0.0447977	1.55672	13.2457	20	536	cellular response to nitrogen compound	0.238811	ENSG00000004799,ENSG00000005882,ENSG00000048052,ENSG00000072062,ENSG00000088888,ENSG00000107263,ENSG00000108946,ENSG00000114166,ENSG00000117461,ENSG00000121879,ENSG00000132356,ENSG00000142875,ENSG00000150907,ENSG00000151422,ENSG00000165699,ENSG00000166263,ENSG00000168710,ENSG00000185591,ENSG00000197442,ENSG00000204406	PDK4,PDK2,HDAC9,PRKACA,MAVS,RAPGEF1,PRKAR1A,KAT2B,PIK3R3,PIK3CA,PRKAA1,PRKACB,FOXO1,FER,TSC1,STXBP4,AHCYL1,SP1,MAP3K5,MBD5
GO:0001976	0.0455676	6.60488	0.345969	2	14	neurological system process involved in regulation of systemic arterial blood pressure	0.238811	ENSG00000071242,ENSG00000169057	RPS6KA2,MECP2
GO:0003085	0.0455676	6.60488	0.345969	2	14	negative regulation of systemic arterial blood pressure	0.238811	ENSG00000140463,ENSG00000165895	BBS4,ARHGAP42
GO:0015693	0.0455676	6.60488	0.345969	2	14	magnesium ion transport	0.238811	ENSG00000102158,ENSG00000104723	MAGT1,TUSC3
GO:0032717	0.0455676	6.60488	0.345969	2	14	negative regulation of interleukin-8 production	0.238811	ENSG00000137486,ENSG00000264522	ARRB1,OTUD7B
GO:0039531	0.0455676	6.60488	0.345969	2	14	regulation of viral-induced cytoplasmic pattern recognition receptor signaling pathway	0.238811	ENSG00000110330,ENSG00000129657	BIRC2,SEC14L1
GO:0048172	0.0455676	6.60488	0.345969	2	14	regulation of short-term neuronal synaptic plasticity	0.238811	ENSG00000115839,ENSG00000198722	RAB3GAP1,UNC13B
GO:0048313	0.0455676	6.60488	0.345969	2	14	Golgi inheritance	0.238811	ENSG00000107862,ENSG00000175073	GBF1,VCPIP1
GO:0051590	0.0455676	6.60488	0.345969	2	14	positive regulation of neurotransmitter transport	0.238811	ENSG00000115839,ENSG00000198722	RAB3GAP1,UNC13B
GO:1902188	0.0455676	6.60488	0.345969	2	14	positive regulation of viral release from host cell	0.238811	ENSG00000115561,ENSG00000119541	CHMP3,VPS4B
GO:0000045	0.0458383	2.6871	1.95226	5	79	autophagosome assembly	0.238811	ENSG00000100330,ENSG00000108239,ENSG00000115839,ENSG00000150867,ENSG00000171100	MTMR3,TBC1D12,RAB3GAP1,PIP4K2A,MTM1
GO:0061515	0.0467294	3.11592	1.35917	4	55	myeloid cell development	0.238811	ENSG00000113916,ENSG00000138594,ENSG00000150867,ENSG00000158195	BCL6,TMOD3,PIP4K2A,WASF2
GO:0071456	0.0471795	2.21317	3.28671	7	133	cellular response to hypoxia	0.238811	ENSG00000089163,ENSG00000132356,ENSG00000149428,ENSG00000164442,ENSG00000166135,ENSG00000171132,ENSG00000173376	SIRT4,PRKAA1,HYOU1,CITED2,HIF1AN,PRKCE,NDNF
GO:0000281	0.0473101	3.96822	0.815499	3	33	mitotic cytokinesis	0.238811	ENSG00000140463,ENSG00000145715,ENSG00000178996	BBS4,RASA1,SNX18
GO:0001961	0.0473101	3.96822	0.815499	3	33	positive regulation of cytokine-mediated signaling pathway	0.238811	ENSG00000088888,ENSG00000115594,ENSG00000121236	MAVS,IL1R1,TRIM6
GO:0002686	0.0473101	3.96822	0.815499	3	33	negative regulation of leukocyte migration	0.238811	ENSG00000106299,ENSG00000159842,ENSG00000186716	WASL,ABR,BCR
GO:0034314	0.0473101	3.96822	0.815499	3	33	Arp2/3 complex-mediated actin nucleation	0.238811	ENSG00000106299,ENSG00000164144,ENSG00000273749	WASL,ARFIP1,CYFIP1
GO:0007272	0.0476993	2.38818	2.61948	6	106	ensheathment of neurons	0.238811	ENSG00000075711,ENSG00000141736,ENSG00000165699,ENSG00000172071,ENSG00000184454,ENSG00000197971	DLG1,ERBB2,TSC1,EIF2AK3,NCMAP,MBP
GO:0008366	0.0476993	2.38818	2.61948	6	106	axon ensheathment	0.238811	ENSG00000075711,ENSG00000141736,ENSG00000165699,ENSG00000172071,ENSG00000184454,ENSG00000197971	DLG1,ERBB2,TSC1,EIF2AK3,NCMAP,MBP
GO:0046834	0.0476993	2.38818	2.61948	6	106	lipid phosphorylation	0.238811	ENSG00000051382,ENSG00000121879,ENSG00000133056,ENSG00000141736,ENSG00000143393,ENSG00000150867	PIK3CB,PIK3CA,PIK3C2B,ERBB2,PI4KB,PIP4K2A
GO:0097530	0.0476993	2.38818	2.61948	6	106	granulocyte migration	0.238811	ENSG00000107862,ENSG00000111199,ENSG00000115594,ENSG00000119535,ENSG00000154639,ENSG00000160255	GBF1,TRPV4,IL1R1,CSF3R,CXADR,ITGB2
GO:0050778	0.0478007	1.49652	15.8405	23	641	positive regulation of immune response	0.238811	ENSG00000026950,ENSG00000051382,ENSG00000072062,ENSG00000088888,ENSG00000106299,ENSG00000110330,ENSG00000112851,ENSG00000121236,ENSG00000121879,ENSG00000124333,ENSG00000129657,ENSG00000142875,ENSG00000150760,ENSG00000157625,ENSG00000158092,ENSG00000158195,ENSG00000160255,ENSG00000166747,ENSG00000170458,ENSG00000171132,ENSG00000177189,ENSG00000205213,ENSG00000273749	BTN3A1,PIK3CB,PRKACA,MAVS,WASL,BIRC2,ERBB2IP,TRIM6,PIK3CA,VAMP7,SEC14L1,PRKACB,DOCK1,TAB3,NCK1,WASF2,ITGB2,AP1G1,CD14,PRKCE,RPS6KA3,LGR4,CYFIP1
GO:0070613	0.0479467	2.65111	1.97697	5	80	regulation of protein processing	0.238811	ENSG00000071242,ENSG00000072062,ENSG00000089163,ENSG00000110330,ENSG00000142875	RPS6KA2,PRKACA,SIRT4,BIRC2,PRKACB
GO:0006869	0.0479997	1.73333	7.73488	13	313	lipid transport	0.238811	ENSG00000021762,ENSG00000073734,ENSG00000113163,ENSG00000117139,ENSG00000117868,ENSG00000119541,ENSG00000124333,ENSG00000128284,ENSG00000130164,ENSG00000135241,ENSG00000144366,ENSG00000186951,ENSG00000198911	OSBPL5,ABCB11,COL4A3BP,KDM5B,ESYT2,VPS4B,VAMP7,APOL3,LDLR,PNPLA8,GULP1,PPARA,SREBF2
GO:0016337	0.0483861	1.46881	17.5456	25	710	single organismal cell-cell adhesion	0.238811	ENSG00000026950,ENSG00000046604,ENSG00000051382,ENSG00000064201,ENSG00000075711,ENSG00000107263,ENSG00000108946,ENSG00000111199,ENSG00000111846,ENSG00000113916,ENSG00000116678,ENSG00000121879,ENSG00000132589,ENSG00000136854,ENSG00000141503,ENSG00000141736,ENSG00000151422,ENSG00000154639,ENSG00000158092,ENSG00000160255,ENSG00000161905,ENSG00000164442,ENSG00000165699,ENSG00000186951,ENSG00000198087	BTN3A1,DSG2,PIK3CB,TSPAN32,DLG1,RAPGEF1,PRKAR1A,TRPV4,GCNT2,BCL6,LEPR,PIK3CA,FLOT2,STXBP1,MINK1,ERBB2,FER,CXADR,NCK1,ITGB2,ALOX15,CITED2,TSC1,PPARA,CD2AP
GO:0000821	0.0488149	39.5596	0.0494242	1	2	regulation of arginine metabolic process	0.238811	ENSG00000155465	SLC7A7
GO:0001550	0.0488149	39.5596	0.0494242	1	2	ovarian cumulus expansion	0.238811	ENSG00000138696	BMPR1B
GO:0002386	0.0488149	39.5596	0.0494242	1	2	immune response in mucosal-associated lymphoid tissue	0.238811	ENSG00000162896	PIGR
GO:0002415	0.0488149	39.5596	0.0494242	1	2	immunoglobulin transcytosis in epithelial cells mediated by polymeric immunoglobulin receptor	0.238811	ENSG00000162896	PIGR
GO:0003165	0.0488149	39.5596	0.0494242	1	2	Purkinje myocyte development	0.238811	ENSG00000046604	DSG2
GO:0006212	0.0488149	39.5596	0.0494242	1	2	uracil catabolic process	0.238811	ENSG00000188641	DPYD
GO:0006407	0.0488149	39.5596	0.0494242	1	2	rRNA export from nucleus	0.238811	ENSG00000165699	TSC1
GO:0006679	0.0488149	39.5596	0.0494242	1	2	glucosylceramide biosynthetic process	0.238811	ENSG00000132356	PRKAA1
GO:0008050	0.0488149	39.5596	0.0494242	1	2	female courtship behavior	0.238811	ENSG00000151090	THRB
GO:0009405	0.0488149	39.5596	0.0494242	1	2	pathogenesis	0.238811	ENSG00000169057	MECP2
GO:0009631	0.0488149	39.5596	0.0494242	1	2	cold acclimation	0.238811	ENSG00000132356	PRKAA1
GO:0015722	0.0488149	39.5596	0.0494242	1	2	canalicular bile acid transport	0.238811	ENSG00000073734	ABCB11
GO:0015876	0.0488149	39.5596	0.0494242	1	2	acetyl-CoA transport	0.238811	ENSG00000169359	SLC33A1
GO:0015880	0.0488149	39.5596	0.0494242	1	2	coenzyme A transport	0.238811	ENSG00000181035	SLC25A42
GO:0015916	0.0488149	39.5596	0.0494242	1	2	fatty-acyl-CoA transport	0.238811	ENSG00000169359	SLC33A1
GO:0016320	0.0488149	39.5596	0.0494242	1	2	endoplasmic reticulum membrane fusion	0.238811	ENSG00000175073	VCPIP1
GO:0018153	0.0488149	39.5596	0.0494242	1	2	isopeptide cross-linking via N6-(L-isoglutamyl)-L-lysine	0.238811	ENSG00000198959	TGM2
GO:0018197	0.0488149	39.5596	0.0494242	1	2	peptidyl-aspartic acid modification	0.238811	ENSG00000166135	HIF1AN
GO:0018262	0.0488149	39.5596	0.0494242	1	2	isopeptide cross-linking	0.238811	ENSG00000198959	TGM2
GO:0019483	0.0488149	39.5596	0.0494242	1	2	beta-alanine biosynthetic process	0.238811	ENSG00000188641	DPYD
GO:0021849	0.0488149	39.5596	0.0494242	1	2	neuroblast division in subventricular zone	0.238811	ENSG00000133961	NUMB
GO:0030103	0.0488149	39.5596	0.0494242	1	2	vasopressin secretion	0.238811	ENSG00000111199	TRPV4
GO:0030860	0.0488149	39.5596	0.0494242	1	2	regulation of polarized epithelial cell differentiation	0.238811	ENSG00000133961	NUMB
GO:0030862	0.0488149	39.5596	0.0494242	1	2	positive regulation of polarized epithelial cell differentiation	0.238811	ENSG00000133961	NUMB
GO:0031022	0.0488149	39.5596	0.0494242	1	2	nuclear migration along microfilament	0.238811	ENSG00000100242	SUN2
GO:0032290	0.0488149	39.5596	0.0494242	1	2	peripheral nervous system myelin formation	0.238811	ENSG00000184454	NCMAP
GO:0032764	0.0488149	39.5596	0.0494242	1	2	negative regulation of mast cell cytokine production	0.238811	ENSG00000113916	BCL6
GO:0033031	0.0488149	39.5596	0.0494242	1	2	positive regulation of neutrophil apoptotic process	0.238811	ENSG00000182782	HCAR2
GO:0033306	0.0488149	39.5596	0.0494242	1	2	phytol metabolic process	0.238811	ENSG00000115425	PECR
GO:0035349	0.0488149	39.5596	0.0494242	1	2	coenzyme A transmembrane transport	0.238811	ENSG00000181035	SLC25A42
GO:0035574	0.0488149	39.5596	0.0494242	1	2	histone H4-K20 demethylation	0.238811	ENSG00000172943	PHF8
GO:0035621	0.0488149	39.5596	0.0494242	1	2	ER to Golgi ceramide transport	0.238811	ENSG00000113163	COL4A3BP
GO:0035668	0.0488149	39.5596	0.0494242	1	2	TRAM-dependent toll-like receptor signaling pathway	0.238811	ENSG00000171132	PRKCE
GO:0035669	0.0488149	39.5596	0.0494242	1	2	TRAM-dependent toll-like receptor 4 signaling pathway	0.238811	ENSG00000171132	PRKCE
GO:0035801	0.0488149	39.5596	0.0494242	1	2	adrenal cortex development	0.238811	ENSG00000164442	CITED2
GO:0035802	0.0488149	39.5596	0.0494242	1	2	adrenal cortex formation	0.238811	ENSG00000164442	CITED2
GO:0035963	0.0488149	39.5596	0.0494242	1	2	cellular response to interleukin-13	0.238811	ENSG00000161905	ALOX15
GO:0036483	0.0488149	39.5596	0.0494242	1	2	neuron intrinsic apoptotic signaling pathway in response to endoplasmic reticulum stress	0.238811	ENSG00000149428	HYOU1
GO:0043321	0.0488149	39.5596	0.0494242	1	2	regulation of natural killer cell degranulation	0.238811	ENSG00000166747	AP1G1
GO:0043323	0.0488149	39.5596	0.0494242	1	2	positive regulation of natural killer cell degranulation	0.238811	ENSG00000166747	AP1G1
GO:0043490	0.0488149	39.5596	0.0494242	1	2	malate-aspartate shuttle	0.238811	ENSG00000115840	SLC25A12
GO:0044313	0.0488149	39.5596	0.0494242	1	2	protein K6-linked deubiquitination	0.238811	ENSG00000135093	USP30
GO:0044861	0.0488149	39.5596	0.0494242	1	2	protein transport into plasma membrane raft	0.238811	ENSG00000130779	CLIP1
GO:0046338	0.0488149	39.5596	0.0494242	1	2	phosphatidylethanolamine catabolic process	0.238811	ENSG00000135241	PNPLA8
GO:0046601	0.0488149	39.5596	0.0494242	1	2	positive regulation of centriole replication	0.238811	ENSG00000119541	VPS4B
GO:0048165	0.0488149	39.5596	0.0494242	1	2	fused antrum stage	0.238811	ENSG00000138696	BMPR1B
GO:0048211	0.0488149	39.5596	0.0494242	1	2	Golgi vesicle docking	0.238811	ENSG00000073969	NSF
GO:0050992	0.0488149	39.5596	0.0494242	1	2	dimethylallyl diphosphate biosynthetic process	0.238811	ENSG00000067064	IDI1
GO:0050993	0.0488149	39.5596	0.0494242	1	2	dimethylallyl diphosphate metabolic process	0.238811	ENSG00000067064	IDI1
GO:0051941	0.0488149	39.5596	0.0494242	1	2	regulation of amino acid uptake involved in synaptic transmission	0.238811	ENSG00000132326	PER2
GO:0051946	0.0488149	39.5596	0.0494242	1	2	regulation of glutamate uptake involved in transmission of nerve impulse	0.238811	ENSG00000132326	PER2
GO:0060734	0.0488149	39.5596	0.0494242	1	2	regulation of endoplasmic reticulum stress-induced eIF2 alpha phosphorylation	0.238811	ENSG00000172071	EIF2AK3
GO:0060995	0.0488149	39.5596	0.0494242	1	2	cell-cell signaling involved in kidney development	0.238811	ENSG00000205213	LGR4
GO:0061187	0.0488149	39.5596	0.0494242	1	2	regulation of chromatin silencing at rDNA	0.238811	ENSG00000172943	PHF8
GO:0061188	0.0488149	39.5596	0.0494242	1	2	negative regulation of chromatin silencing at rDNA	0.238811	ENSG00000172943	PHF8
GO:0061289	0.0488149	39.5596	0.0494242	1	2	Wnt signaling pathway involved in kidney development	0.238811	ENSG00000205213	LGR4
GO:0061290	0.0488149	39.5596	0.0494242	1	2	canonical Wnt signaling pathway involved in metanephric kidney development	0.238811	ENSG00000205213	LGR4
GO:0061535	0.0488149	39.5596	0.0494242	1	2	glutamate secretion, neurotransmission	0.238811	ENSG00000115839	RAB3GAP1
GO:0061762	0.0488149	39.5596	0.0494242	1	2	CAMKK-AMPK signaling cascade	0.238811	ENSG00000132356	PRKAA1
GO:0061763	0.0488149	39.5596	0.0494242	1	2	multivesicular body-lysosome fusion	0.238811	ENSG00000115561	CHMP3
GO:0070563	0.0488149	39.5596	0.0494242	1	2	negative regulation of vitamin D receptor signaling pathway	0.238811	ENSG00000197256	KANK2
GO:0071106	0.0488149	39.5596	0.0494242	1	2	adenosine 3',5'-bisphosphate transmembrane transport	0.238811	ENSG00000181035	SLC25A42
GO:0071461	0.0488149	39.5596	0.0494242	1	2	cellular response to redox state	0.238811	ENSG00000111348	ARHGDIB
GO:0071608	0.0488149	39.5596	0.0494242	1	2	macrophage inflammatory protein-1 alpha production	0.238811	ENSG00000111199	TRPV4
GO:0071640	0.0488149	39.5596	0.0494242	1	2	regulation of macrophage inflammatory protein 1 alpha production	0.238811	ENSG00000111199	TRPV4
GO:0072204	0.0488149	39.5596	0.0494242	1	2	cell-cell signaling involved in metanephros development	0.238811	ENSG00000205213	LGR4
GO:0072361	0.0488149	39.5596	0.0494242	1	2	regulation of glycolytic process by regulation of transcription from RNA polymerase II promoter	0.238811	ENSG00000186951	PPARA
GO:0072364	0.0488149	39.5596	0.0494242	1	2	regulation of cellular ketone metabolic process by regulation of transcription from RNA polymerase II promoter	0.238811	ENSG00000186951	PPARA
GO:0072368	0.0488149	39.5596	0.0494242	1	2	regulation of lipid transport by negative regulation of transcription from RNA polymerase II promoter	0.238811	ENSG00000198911	SREBF2
GO:0072369	0.0488149	39.5596	0.0494242	1	2	regulation of lipid transport by positive regulation of transcription from RNA polymerase II promoter	0.238811	ENSG00000186951	PPARA
GO:0072566	0.0488149	39.5596	0.0494242	1	2	chemokine (C-X-C motif) ligand 1 production	0.238811	ENSG00000111199	TRPV4
GO:0080121	0.0488149	39.5596	0.0494242	1	2	AMP transport	0.238811	ENSG00000181035	SLC25A42
GO:0090149	0.0488149	39.5596	0.0494242	1	2	mitochondrial membrane fission	0.238811	ENSG00000164209	SLC25A46
GO:0097111	0.0488149	39.5596	0.0494242	1	2	endoplasmic reticulum-Golgi intermediate compartment organization	0.238811	ENSG00000107862	GBF1
GO:0097338	0.0488149	39.5596	0.0494242	1	2	response to clozapine	0.238811	ENSG00000142875	PRKACB
GO:0099004	0.0488149	39.5596	0.0494242	1	2	calmodulin dependent kinase signaling pathway	0.238811	ENSG00000132356	PRKAA1
GO:1900169	0.0488149	39.5596	0.0494242	1	2	regulation of glucocorticoid mediated signaling pathway	0.238811	ENSG00000170776	AKAP13
GO:1900920	0.0488149	39.5596	0.0494242	1	2	regulation of L-glutamate import	0.238811	ENSG00000132326	PER2
GO:1901074	0.0488149	39.5596	0.0494242	1	2	regulation of engulfment of apoptotic cell	0.238811	ENSG00000161905	ALOX15
GO:1901337	0.0488149	39.5596	0.0494242	1	2	thioester transport	0.238811	ENSG00000169359	SLC33A1
GO:1901570	0.0488149	39.5596	0.0494242	1	2	fatty acid derivative biosynthetic process	0.238811	ENSG00000161905	ALOX15
GO:1902523	0.0488149	39.5596	0.0494242	1	2	positive regulation of protein K63-linked ubiquitination	0.238811	ENSG00000110330	BIRC2
GO:1902524	0.0488149	39.5596	0.0494242	1	2	positive regulation of protein K48-linked ubiquitination	0.238811	ENSG00000110330	BIRC2
GO:1902527	0.0488149	39.5596	0.0494242	1	2	positive regulation of protein monoubiquitination	0.238811	ENSG00000110330	BIRC2
GO:1903173	0.0488149	39.5596	0.0494242	1	2	fatty alcohol metabolic process	0.238811	ENSG00000115425	PECR
GO:1903216	0.0488149	39.5596	0.0494242	1	2	regulation of protein processing involved in protein targeting to mitochondrion	0.238811	ENSG00000089163	SIRT4
GO:1903217	0.0488149	39.5596	0.0494242	1	2	negative regulation of protein processing involved in protein targeting to mitochondrion	0.238811	ENSG00000089163	SIRT4
GO:1903233	0.0488149	39.5596	0.0494242	1	2	regulation of calcium ion-dependent exocytosis of neurotransmitter	0.238811	ENSG00000115839	RAB3GAP1
GO:1903373	0.0488149	39.5596	0.0494242	1	2	positive regulation of endoplasmic reticulum tubular network organization	0.238811	ENSG00000115839	RAB3GAP1
GO:1903381	0.0488149	39.5596	0.0494242	1	2	regulation of endoplasmic reticulum stress-induced neuron intrinsic apoptotic signaling pathway	0.238811	ENSG00000149428	HYOU1
GO:1903382	0.0488149	39.5596	0.0494242	1	2	negative regulation of endoplasmic reticulum stress-induced neuron intrinsic apoptotic signaling pathway	0.238811	ENSG00000149428	HYOU1
GO:1903526	0.0488149	39.5596	0.0494242	1	2	negative regulation of membrane tubulation	0.238811	ENSG00000106299	WASL
GO:1903722	0.0488149	39.5596	0.0494242	1	2	regulation of centriole elongation	0.238811	ENSG00000119541	VPS4B
GO:1903778	0.0488149	39.5596	0.0494242	1	2	protein localization to vacuolar membrane	0.238811	ENSG00000124333	VAMP7
GO:1903895	0.0488149	39.5596	0.0494242	1	2	negative regulation of IRE1-mediated unfolded protein response	0.238811	ENSG00000103429	BFAR
GO:1903903	0.0488149	39.5596	0.0494242	1	2	regulation of establishment of T cell polarity	0.238811	ENSG00000132589	FLOT2
GO:1904327	0.0488149	39.5596	0.0494242	1	2	protein localization to cytosolic proteasome complex	0.238811	ENSG00000204463	BAG6
GO:1904379	0.0488149	39.5596	0.0494242	1	2	protein localization to cytosolic proteasome complex involved in ERAD pathway	0.238811	ENSG00000204463	BAG6
GO:1904562	0.0488149	39.5596	0.0494242	1	2	phosphatidylinositol 5-phosphate metabolic process	0.238811	ENSG00000100330	MTMR3
GO:2000302	0.0488149	39.5596	0.0494242	1	2	positive regulation of synaptic vesicle exocytosis	0.238811	ENSG00000198722	UNC13B
GO:2000338	0.0488149	39.5596	0.0494242	1	2	regulation of chemokine (C-X-C motif) ligand 1 production	0.238811	ENSG00000111199	TRPV4
GO:2000340	0.0488149	39.5596	0.0494242	1	2	positive regulation of chemokine (C-X-C motif) ligand 1 production	0.238811	ENSG00000111199	TRPV4
GO:2001106	0.0488149	39.5596	0.0494242	1	2	regulation of Rho guanyl-nucleotide exchange factor activity	0.238811	ENSG00000260916	CCPG1
GO:2001301	0.0488149	39.5596	0.0494242	1	2	lipoxin biosynthetic process	0.238811	ENSG00000161905	ALOX15
GO:2001302	0.0488149	39.5596	0.0494242	1	2	lipoxin A4 metabolic process	0.238811	ENSG00000161905	ALOX15
GO:2001303	0.0488149	39.5596	0.0494242	1	2	lipoxin A4 biosynthetic process	0.238811	ENSG00000161905	ALOX15
GO:1903827	0.0492088	1.53824	13.394	20	542	regulation of cellular protein localization	0.240484	ENSG00000068912,ENSG00000072062,ENSG00000075711,ENSG00000082196,ENSG00000088888,ENSG00000089163,ENSG00000107816,ENSG00000107862,ENSG00000116574,ENSG00000120756,ENSG00000124333,ENSG00000127334,ENSG00000133961,ENSG00000138032,ENSG00000141736,ENSG00000160695,ENSG00000172071,ENSG00000198087,ENSG00000198911,ENSG00000264522	ERLEC1,PRKACA,DLG1,C1QTNF3,MAVS,SIRT4,LZTS2,GBF1,RHOU,PLS1,VAMP7,DYRK2,NUMB,PPM1B,ERBB2,VPS11,EIF2AK3,CD2AP,SREBF2,OTUD7B
GO:1901880	0.0493827	3.05581	1.38388	4	56	negative regulation of protein depolymerization	0.241079	ENSG00000006747,ENSG00000138594,ENSG00000151491,ENSG00000173898	SCIN,TMOD3,EPS8,SPTBN2
GO:0051960	0.0494796	1.4538	18.4352	26	746	regulation of nervous system development	0.241298	ENSG00000008086,ENSG00000072062,ENSG00000075223,ENSG00000075711,ENSG00000106078,ENSG00000107263,ENSG00000111199,ENSG00000113916,ENSG00000124333,ENSG00000127603,ENSG00000130779,ENSG00000132326,ENSG00000133961,ENSG00000134313,ENSG00000141298,ENSG00000142875,ENSG00000145868,ENSG00000158092,ENSG00000163110,ENSG00000169057,ENSG00000172071,ENSG00000173376,ENSG00000175745,ENSG00000184454,ENSG00000198399…	CDKL5,PRKACA,SEMA3C,DLG1,COBL,RAPGEF1,TRPV4,BCL6,VAMP7,MACF1,CLIP1,PER2,NUMB,KIDINS220,SSH2,PRKACB,FBXO38,NCK1,PDLIM5,MECP2,EIF2AK3,NDNF,NR2F1,NCMAP,ITSN2,ADRA2B
GO:0051253	0.0495395	1.35602	29.7286	39	1203	negative regulation of RNA metabolic process	0.241335	ENSG00000048052,ENSG00000052795,ENSG00000075711,ENSG00000076108,ENSG00000080561,ENSG00000089163,ENSG00000111199,ENSG00000111424,ENSG00000111707,ENSG00000111727,ENSG00000113916,ENSG00000117036,ENSG00000117139,ENSG00000117625,ENSG00000119669,ENSG00000121236,ENSG00000132326,ENSG00000136169,ENSG00000144791,ENSG00000150907,ENSG00000151090,ENSG00000153814,ENSG00000158092,ENSG00000164442,ENSG00000165156…	HDAC9,FNIP2,DLG1,BAZ2A,MID2,SIRT4,TRPV4,VDR,SUDS3,HCFC2,BCL6,ETV3,KDM5B,RCOR3,IRF2BPL,TRIM6,PER2,SETDB2,LIMD1,FOXO1,THRB,JAZF1,NCK1,CITED2,ZHX1,HIF1AN,IRF2,MECP2,ZNF217,PHF8,NR2F1,ZFP90,PPARA,MPHOSPH8,STRN3,KANK2,SREBF2,LGR4,OTUD7B
GO:1903317	0.0501117	2.61606	2.00168	5	81	regulation of protein maturation	0.243866	ENSG00000071242,ENSG00000072062,ENSG00000089163,ENSG00000110330,ENSG00000142875	RPS6KA2,PRKACA,SIRT4,BIRC2,PRKACB
GO:0060255	0.0502946	1.19104	140.81	157	5698	regulation of macromolecule metabolic process	0.244301	ENSG00000006468,ENSG00000007237,ENSG00000048052,ENSG00000051382,ENSG00000052795,ENSG00000055609,ENSG00000068912,ENSG00000071242,ENSG00000072062,ENSG00000073969,ENSG00000075711,ENSG00000076108,ENSG00000077232,ENSG00000078687,ENSG00000080561,ENSG00000084234,ENSG00000085832,ENSG00000088888,ENSG00000089163,ENSG00000092330,ENSG00000100665,ENSG00000102471,ENSG00000102580,ENSG00000105855,ENSG00000106052…	ETV1,GAS7,HDAC9,PIK3CB,FNIP2,KMT2C,ERLEC1,RPS6KA2,PRKACA,NSF,DLG1,BAZ2A,DNAJC10,TNRC6C,MID2,APLP2,EPS15,MAVS,SIRT4,TINF2,SERPINA4,NDFIP2,DNAJC3,ITGB8,TAX1BP1,WASL,KDM4C,RGP1,RAPGEF1,ZMIZ1,RAI1,PRKAR1A,BIRC2,TRPV4,VDR,SUDS3,HCFC2,GCNT2,ERBB2IP,SEC24A,BCL6,KAT2B,USP4,EFEMP1,RAB3GAP1,DHCR24,ETV3,KDM5B,RCOR3,ANKRD13C,IRF2BPL,HOXB5,APAF1,TRIM6,PIK3CA,NCOA3,BBS2,HIVEP3,DYRK2,LDLR,TRAF7,PER2,PRKAA1,FLOT…
GO:0010876	0.0503066	1.68242	8.5751	14	347	lipid localization	0.244301	ENSG00000021762,ENSG00000073734,ENSG00000100439,ENSG00000113163,ENSG00000117139,ENSG00000117868,ENSG00000119541,ENSG00000124333,ENSG00000128284,ENSG00000130164,ENSG00000135241,ENSG00000144366,ENSG00000186951,ENSG00000198911	OSBPL5,ABCB11,ABHD4,COL4A3BP,KDM5B,ESYT2,VPS4B,VAMP7,APOL3,LDLR,PNPLA8,GULP1,PPARA,SREBF2
GO:0006950	0.0506741	1.21947	87.9009	102	3557	response to stress	0.245208	ENSG00000001561,ENSG00000004799,ENSG00000005882,ENSG00000008952,ENSG00000025796,ENSG00000048052,ENSG00000051382,ENSG00000052795,ENSG00000064201,ENSG00000068912,ENSG00000072062,ENSG00000075711,ENSG00000077232,ENSG00000080561,ENSG00000082196,ENSG00000088888,ENSG00000089163,ENSG00000100280,ENSG00000100330,ENSG00000102580,ENSG00000102699,ENSG00000103429,ENSG00000107798,ENSG00000108946,ENSG00000110330…	ENPP4,PDK4,PDK2,SEC62,SEC63,HDAC9,PIK3CB,FNIP2,TSPAN32,ERLEC1,PRKACA,DLG1,DNAJC10,MID2,C1QTNF3,MAVS,SIRT4,AP1B1,MTMR3,DNAJC3,PARP4,BFAR,LIPA,PRKAR1A,BIRC2,TRPV4,ERBB2IP,COL4A3BP,BCL6,IL1R1,DHCR24,EDEM3,MUC5B,RAB14,CSF3R,APAF1,TRIM6,PIK3CA,VAMP7,DYRK2,MACF1,APOL3,SEC14L1,LDLR,PER2,PRKAA1,PIK3C2B,TAOK3,FAIM2,STXBP1,ARRB1,PPM1B,BMPR1B,GIT2,FBLN5,SLC12A6,MINK1,ERBB2,PRKACB,LIMD1,HYOU1,DOCK1,FOXO1,FER…
GO:0007160	0.0507681	1.95118	4.76943	9	193	cell-matrix adhesion	0.245208	ENSG00000051382,ENSG00000113916,ENSG00000127603,ENSG00000140092,ENSG00000141503,ENSG00000145715,ENSG00000160255,ENSG00000165699,ENSG00000248905	PIK3CB,BCL6,MACF1,FBLN5,MINK1,RASA1,ITGB2,TSC1,FMN1
GO:0007031	0.0509703	3.83997	0.840211	3	34	peroxisome organization	0.245208	ENSG00000088888,ENSG00000102910,ENSG00000166575	MAVS,LONP2,TMEM135
GO:0019076	0.0509703	3.83997	0.840211	3	34	viral release from host cell	0.245208	ENSG00000080561,ENSG00000115561,ENSG00000119541	MID2,CHMP3,VPS4B
GO:0043277	0.0509703	3.83997	0.840211	3	34	apoptotic cell clearance	0.245208	ENSG00000119396,ENSG00000161905,ENSG00000198959	RAB14,ALOX15,TGM2
GO:0046579	0.0509703	3.83997	0.840211	3	34	positive regulation of Ras protein signal transduction	0.245208	ENSG00000137486,ENSG00000170776,ENSG00000198915	ARRB1,AKAP13,RASGEF1A
GO:0060760	0.0509703	3.83997	0.840211	3	34	positive regulation of response to cytokine stimulus	0.245208	ENSG00000088888,ENSG00000115594,ENSG00000121236	MAVS,IL1R1,TRIM6
GO:0097300	0.0509703	3.83997	0.840211	3	34	programmed necrotic cell death	0.245208	ENSG00000110330,ENSG00000170458,ENSG00000197442	BIRC2,CD14,MAP3K5
GO:1902803	0.0509703	3.83997	0.840211	3	34	regulation of synaptic vesicle transport	0.245208	ENSG00000115839,ENSG00000136854,ENSG00000198722	RAB3GAP1,STXBP1,UNC13B
GO:0006086	0.0517374	6.09644	0.370681	2	15	acetyl-CoA biosynthetic process from pyruvate	0.246846	ENSG00000004799,ENSG00000005882	PDK4,PDK2
GO:0010878	0.0517374	6.09644	0.370681	2	15	cholesterol storage	0.246846	ENSG00000186951,ENSG00000198911	PPARA,SREBF2
GO:0021692	0.0517374	6.09644	0.370681	2	15	cerebellar Purkinje cell layer morphogenesis	0.246846	ENSG00000135472,ENSG00000173898	FAIM2,SPTBN2
GO:0035024	0.0517374	6.09644	0.370681	2	15	negative regulation of Rho protein signal transduction	0.246846	ENSG00000113916,ENSG00000165895	BCL6,ARHGAP42
GO:0048308	0.0517374	6.09644	0.370681	2	15	organelle inheritance	0.246846	ENSG00000107862,ENSG00000175073	GBF1,VCPIP1
GO:0060049	0.0517374	6.09644	0.370681	2	15	regulation of protein glycosylation	0.246846	ENSG00000092330,ENSG00000114166	TINF2,KAT2B
GO:1902187	0.0517374	6.09644	0.370681	2	15	negative regulation of viral release from host cell	0.246846	ENSG00000080561,ENSG00000115561	MID2,CHMP3
GO:2000369	0.0517374	6.09644	0.370681	2	15	regulation of clathrin-dependent endocytosis	0.246846	ENSG00000051382,ENSG00000106299	PIK3CB,WASL
GO:0001816	0.0519942	1.49559	15.1485	22	613	cytokine production	0.24747	ENSG00000026950,ENSG00000075711,ENSG00000082196,ENSG00000088888,ENSG00000106052,ENSG00000107798,ENSG00000110042,ENSG00000110330,ENSG00000111199,ENSG00000112851,ENSG00000113916,ENSG00000121236,ENSG00000129657,ENSG00000136231,ENSG00000137486,ENSG00000138032,ENSG00000170458,ENSG00000172071,ENSG00000186470,ENSG00000198087,ENSG00000205213,ENSG00000264522	BTN3A1,DLG1,C1QTNF3,MAVS,TAX1BP1,LIPA,DTX4,BIRC2,TRPV4,ERBB2IP,BCL6,TRIM6,SEC14L1,IGF2BP3,ARRB1,PPM1B,CD14,EIF2AK3,BTN3A2,CD2AP,LGR4,OTUD7B
GO:0030534	0.0520642	2.1613	3.36084	7	136	adult behavior	0.24747	ENSG00000125124,ENSG00000140463,ENSG00000151491,ENSG00000165699,ENSG00000169057,ENSG00000173898,ENSG00000186951	BBS2,BBS4,EPS8,TSC1,MECP2,SPTBN2,PPARA
GO:0060491	0.0520642	2.1613	3.36084	7	136	regulation of cell projection assembly	0.24747	ENSG00000106078,ENSG00000106299,ENSG00000140463,ENSG00000141298,ENSG00000151422,ENSG00000158195,ENSG00000184640	COBL,WASL,BBS4,SSH2,FER,WASF2,SEPT9
GO:0010507	0.0521174	2.99797	1.40859	4	57	negative regulation of autophagy	0.24747	ENSG00000116678,ENSG00000157625,ENSG00000165699,ENSG00000171100	LEPR,TAB3,TSC1,MTM1
GO:0001763	0.0521355	1.94051	4.79415	9	194	morphogenesis of a branching structure	0.24747	ENSG00000075223,ENSG00000075711,ENSG00000111424,ENSG00000117139,ENSG00000136158,ENSG00000149418,ENSG00000164056,ENSG00000198959,ENSG00000205213	SEMA3C,DLG1,VDR,KDM5B,SPRY2,ST14,SPRY1,TGM2,LGR4
GO:0016575	0.0523332	2.58193	2.02639	5	82	histone deacetylation	0.248154	ENSG00000048052,ENSG00000076108,ENSG00000111707,ENSG00000113916,ENSG00000132326	HDAC9,BAZ2A,SUDS3,BCL6,PER2
GO:1903531	0.052684	2.03103	4.0775	8	165	negative regulation of secretion by cell	0.249562	ENSG00000082196,ENSG00000089163,ENSG00000119541,ENSG00000156675,ENSG00000159842,ENSG00000186716,ENSG00000205213,ENSG00000274286	C1QTNF3,SIRT4,VPS4B,RAB11FIP1,ABR,BCR,LGR4,ADRA2B
GO:0034622	0.0531776	1.3897	23.7483	32	961	cellular macromolecular complex assembly	0.251642	ENSG00000006747,ENSG00000075711,ENSG00000085832,ENSG00000106078,ENSG00000106299,ENSG00000111199,ENSG00000113282,ENSG00000114316,ENSG00000115561,ENSG00000121236,ENSG00000124333,ENSG00000130779,ENSG00000136854,ENSG00000138594,ENSG00000140463,ENSG00000144791,ENSG00000145715,ENSG00000151422,ENSG00000151491,ENSG00000158092,ENSG00000158290,ENSG00000159082,ENSG00000160695,ENSG00000161905,ENSG00000164144…	SCIN,DLG1,EPS15,COBL,WASL,TRPV4,CLINT1,USP4,CHMP3,TRIM6,VAMP7,CLIP1,STXBP1,TMOD3,BBS4,LIMD1,RASA1,FER,EPS8,NCK1,CUL4B,SYNJ1,VPS11,ALOX15,ARFIP1,TMED10,PRKCE,SPTBN2,SMYD3,UNC13B,FMN1,CYFIP1
GO:0007596	0.0533023	1.66709	8.64923	14	350	blood coagulation	0.251974	ENSG00000001561,ENSG00000051382,ENSG00000064201,ENSG00000072062,ENSG00000108946,ENSG00000121879,ENSG00000136854,ENSG00000137486,ENSG00000142875,ENSG00000150760,ENSG00000165929,ENSG00000168310,ENSG00000171132,ENSG00000274286	ENPP4,PIK3CB,TSPAN32,PRKACA,PRKAR1A,PIK3CA,STXBP1,ARRB1,PRKACB,DOCK1,TC2N,IRF2,PRKCE,ADRA2B
GO:0051247	0.0538173	1.31551	36.1785	46	1464	positive regulation of protein metabolic process	0.254149	ENSG00000051382,ENSG00000052795,ENSG00000072062,ENSG00000073969,ENSG00000075711,ENSG00000088888,ENSG00000102471,ENSG00000102580,ENSG00000107263,ENSG00000108946,ENSG00000110330,ENSG00000111199,ENSG00000111846,ENSG00000113916,ENSG00000115839,ENSG00000120868,ENSG00000121236,ENSG00000121879,ENSG00000131653,ENSG00000132356,ENSG00000134313,ENSG00000135090,ENSG00000136158,ENSG00000137486,ENSG00000138193…	PIK3CB,FNIP2,PRKACA,NSF,DLG1,MAVS,NDFIP2,DNAJC3,RAPGEF1,PRKAR1A,BIRC2,TRPV4,GCNT2,BCL6,RAB3GAP1,APAF1,TRIM6,PIK3CA,TRAF7,PRKAA1,KIDINS220,TAOK3,SPRY2,ARRB1,PLCE1,PELI2,MINK1,ERBB2,PRKACB,IGFBP3,FOXO1,TAB3,NCK1,CUL4B,VPS11,ALOX15,AKAP13,PRKCE,EIF2AK3,TADA2B,SMYD3,DAPK1,MAP3K5,ASPH,BAG6,ADRA2B
GO:0043244	0.0546114	2.54867	2.0511	5	83	regulation of protein complex disassembly	0.256525	ENSG00000006747,ENSG00000111199,ENSG00000138594,ENSG00000151491,ENSG00000173898	SCIN,TRPV4,TMOD3,EPS8,SPTBN2
GO:0046777	0.0547212	1.84771	5.58493	10	226	protein autophosphorylation	0.256525	ENSG00000008086,ENSG00000072062,ENSG00000135090,ENSG00000141503,ENSG00000141736,ENSG00000151422,ENSG00000162434,ENSG00000172071,ENSG00000186716,ENSG00000196730	CDKL5,PRKACA,TAOK3,MINK1,ERBB2,FER,JAK1,EIF2AK3,BCR,DAPK1
GO:0051607	0.0547212	1.84771	5.58493	10	226	defense response to virus	0.256525	ENSG00000064201,ENSG00000088888,ENSG00000100280,ENSG00000102580,ENSG00000110330,ENSG00000121236,ENSG00000129657,ENSG00000138032,ENSG00000166747,ENSG00000175115	TSPAN32,MAVS,AP1B1,DNAJC3,BIRC2,TRIM6,SEC14L1,PPM1B,AP1G1,PACS1
GO:0032094	0.0547637	3.71974	0.864923	3	35	response to food	0.256525	ENSG00000125124,ENSG00000140463,ENSG00000186951	BBS2,BBS4,PPARA
GO:0046839	0.0547637	3.71974	0.864923	3	35	phospholipid dephosphorylation	0.256525	ENSG00000100330,ENSG00000159082,ENSG00000171100	MTMR3,SYNJ1,MTM1
GO:0051932	0.0547637	3.71974	0.864923	3	35	synaptic transmission, GABAergic	0.256525	ENSG00000136854,ENSG00000171132,ENSG00000185666	STXBP1,PRKCE,SYN3
GO:0070423	0.0547637	3.71974	0.864923	3	35	nucleotide-binding oligomerization domain containing signaling pathway	0.256525	ENSG00000110330,ENSG00000112851,ENSG00000157625	BIRC2,ERBB2IP,TAB3
GO:1990090	0.0547637	3.71974	0.864923	3	35	cellular response to nerve growth factor stimulus	0.256525	ENSG00000107263,ENSG00000114331,ENSG00000134313	RAPGEF1,ACAP2,KIDINS220
GO:0051172	0.0553185	1.31246	36.2526	46	1467	negative regulation of nitrogen compound metabolic process	0.258862	ENSG00000048052,ENSG00000052795,ENSG00000075711,ENSG00000076108,ENSG00000078687,ENSG00000080561,ENSG00000089163,ENSG00000092330,ENSG00000111199,ENSG00000111424,ENSG00000111707,ENSG00000111727,ENSG00000113916,ENSG00000117036,ENSG00000117139,ENSG00000117625,ENSG00000119669,ENSG00000121236,ENSG00000132326,ENSG00000132356,ENSG00000136169,ENSG00000136231,ENSG00000144791,ENSG00000150907,ENSG00000151090…	HDAC9,FNIP2,DLG1,BAZ2A,TNRC6C,MID2,SIRT4,TINF2,TRPV4,VDR,SUDS3,HCFC2,BCL6,ETV3,KDM5B,RCOR3,IRF2BPL,TRIM6,PER2,PRKAA1,SETDB2,IGF2BP3,LIMD1,FOXO1,THRB,JAZF1,NCK1,CITED2,ZHX1,TSC1,HIF1AN,IRF2,MECP2,ZNF217,EIF2AK3,PHF8,NR2F1,ZFP90,PPARA,MPHOSPH8,DAPK1,STRN3,KANK2,SREBF2,LGR4,OTUD7B
GO:0042157	0.0554911	2.12804	3.41027	7	138	lipoprotein metabolic process	0.259407	ENSG00000072062,ENSG00000115839,ENSG00000128284,ENSG00000130164,ENSG00000138032,ENSG00000142875,ENSG00000186951	PRKACA,RAB3GAP1,APOL3,LDLR,PPM1B,PRKACB,PPARA
GO:0006796	0.057035	1.22551	74.1857	87	3002	phosphate-containing compound metabolic process	0.266355	ENSG00000004799,ENSG00000005882,ENSG00000008086,ENSG00000051382,ENSG00000052795,ENSG00000058091,ENSG00000067064,ENSG00000071242,ENSG00000072062,ENSG00000075711,ENSG00000077232,ENSG00000088888,ENSG00000100330,ENSG00000100439,ENSG00000102580,ENSG00000107263,ENSG00000108389,ENSG00000108946,ENSG00000109452,ENSG00000111199,ENSG00000111846,ENSG00000113163,ENSG00000114166,ENSG00000115380,ENSG00000117461…	PDK4,PDK2,CDKL5,PIK3CB,FNIP2,CDK14,IDI1,RPS6KA2,PRKACA,DLG1,DNAJC10,MAVS,MTMR3,ABHD4,DNAJC3,RAPGEF1,MTMR4,PRKAR1A,INPP4B,TRPV4,GCNT2,COL4A3BP,KAT2B,EFEMP1,PIK3R3,TJP2,TRIM6,PIK3CA,DYRK2,TRAF7,PRKAA1,PIK3C2B,KIDINS220,TAOK3,PNPLA8,SPRY2,ARRB1,PPM1B,PLCE1,BMPR1B,PAPSS1,PELI2,SSH2,GNAL,MINK1,ERBB2,PRKACB,CTTNBP2NL,PI4KB,LIMD1,RASA1,IGFBP3,PIP4K2A,FOXO1,FER,CNKSR3,PTPRN2,DEPTOR,TAB3,NCK1,SYNJ1,MORC3,…
GO:0016042	0.0572285	1.72468	7.16651	12	290	lipid catabolic process	0.266699	ENSG00000019186,ENSG00000100439,ENSG00000101846,ENSG00000102910,ENSG00000107798,ENSG00000115234,ENSG00000132356,ENSG00000135241,ENSG00000138193,ENSG00000171132,ENSG00000182782,ENSG00000186951	CYP24A1,ABHD4,STS,LONP2,LIPA,SNX17,PRKAA1,PNPLA8,PLCE1,PRKCE,HCAR2,PPARA
GO:0035264	0.057256	2.11178	3.43498	7	139	multicellular organism growth	0.266699	ENSG00000108557,ENSG00000120756,ENSG00000121879,ENSG00000125124,ENSG00000140463,ENSG00000173898,ENSG00000204406	RAI1,PLS1,PIK3CA,BBS2,BBS4,SPTBN2,MBD5
GO:0048813	0.0572815	2.27375	2.74304	6	111	dendrite morphogenesis	0.266699	ENSG00000008086,ENSG00000124333,ENSG00000134313,ENSG00000141503,ENSG00000163110,ENSG00000248905	CDKL5,VAMP7,KIDINS220,MINK1,PDLIM5,FMN1
GO:0050817	0.0574845	1.64706	8.74808	14	354	coagulation	0.267375	ENSG00000001561,ENSG00000051382,ENSG00000064201,ENSG00000072062,ENSG00000108946,ENSG00000121879,ENSG00000136854,ENSG00000137486,ENSG00000142875,ENSG00000150760,ENSG00000165929,ENSG00000168310,ENSG00000171132,ENSG00000274286	ENPP4,PIK3CB,TSPAN32,PRKACA,PRKAR1A,PIK3CA,STXBP1,ARRB1,PRKACB,DOCK1,TC2N,IRF2,PRKCE,ADRA2B
GO:0043242	0.0578295	2.88859	1.45801	4	59	negative regulation of protein complex disassembly	0.268171	ENSG00000006747,ENSG00000138594,ENSG00000151491,ENSG00000173898	SCIN,TMOD3,EPS8,SPTBN2
GO:0070988	0.0578295	2.88859	1.45801	4	59	demethylation	0.268171	ENSG00000001630,ENSG00000107077,ENSG00000117139,ENSG00000172943	CYP51A1,KDM4C,KDM5B,PHF8
GO:1901989	0.0578295	2.88859	1.45801	4	59	positive regulation of cell cycle phase transition	0.268171	ENSG00000119541,ENSG00000138594,ENSG00000158290,ENSG00000166263	VPS4B,TMOD3,CUL4B,STXBP4
GO:0021756	0.0581852	5.66063	0.395393	2	16	striatum development	0.268208	ENSG00000125124,ENSG00000140463	BBS2,BBS4
GO:0031998	0.0581852	5.66063	0.395393	2	16	regulation of fatty acid beta-oxidation	0.268208	ENSG00000102910,ENSG00000186951	LONP2,PPARA
GO:0035855	0.0581852	5.66063	0.395393	2	16	megakaryocyte development	0.268208	ENSG00000150867,ENSG00000158195	PIP4K2A,WASF2
GO:0045724	0.0581852	5.66063	0.395393	2	16	positive regulation of cilium assembly	0.268208	ENSG00000140463,ENSG00000184640	BBS4,SEPT9
GO:0071380	0.0581852	5.66063	0.395393	2	16	cellular response to prostaglandin E stimulus	0.268208	ENSG00000132356,ENSG00000171132	PRKAA1,PRKCE
GO:2000811	0.0581852	5.66063	0.395393	2	16	negative regulation of anoikis	0.268208	ENSG00000004799,ENSG00000121879	PDK4,PIK3CA
GO:0071902	0.0584263	1.71839	7.19122	12	291	positive regulation of protein serine/threonine kinase activity	0.269052	ENSG00000051382,ENSG00000131653,ENSG00000132356,ENSG00000135090,ENSG00000136158,ENSG00000137486,ENSG00000138193,ENSG00000141736,ENSG00000157625,ENSG00000170776,ENSG00000197442,ENSG00000274286	PIK3CB,TRAF7,PRKAA1,TAOK3,SPRY2,ARRB1,PLCE1,ERBB2,TAB3,AKAP13,MAP3K5,ADRA2B
GO:0007599	0.058564	1.64213	8.77279	14	355	hemostasis	0.269186	ENSG00000001561,ENSG00000051382,ENSG00000064201,ENSG00000072062,ENSG00000108946,ENSG00000121879,ENSG00000136854,ENSG00000137486,ENSG00000142875,ENSG00000150760,ENSG00000165929,ENSG00000168310,ENSG00000171132,ENSG00000274286	ENPP4,PIK3CB,TSPAN32,PRKACA,PRKAR1A,PIK3CA,STXBP1,ARRB1,PRKACB,DOCK1,TC2N,IRF2,PRKCE,ADRA2B
GO:0035872	0.0586881	3.6068	0.889635	3	36	nucleotide-binding domain, leucine rich repeat containing receptor signaling pathway	0.269186	ENSG00000110330,ENSG00000112851,ENSG00000157625	BIRC2,ERBB2IP,TAB3
GO:0048009	0.0586881	3.6068	0.889635	3	36	insulin-like growth factor receptor signaling pathway	0.269186	ENSG00000146674,ENSG00000150938,ENSG00000172071	IGFBP3,CRIM1,EIF2AK3
GO:0051898	0.0586881	3.6068	0.889635	3	36	negative regulation of protein kinase B signaling	0.269186	ENSG00000075711,ENSG00000107263,ENSG00000171100	DLG1,RAPGEF1,MTM1
GO:0030182	0.0587755	1.34001	29.2591	38	1184	neuron differentiation	0.269265	ENSG00000006468,ENSG00000008086,ENSG00000048052,ENSG00000075223,ENSG00000104133,ENSG00000106078,ENSG00000107263,ENSG00000107731,ENSG00000111199,ENSG00000113916,ENSG00000124333,ENSG00000127603,ENSG00000130779,ENSG00000133961,ENSG00000134313,ENSG00000135472,ENSG00000136854,ENSG00000138002,ENSG00000138696,ENSG00000140463,ENSG00000141298,ENSG00000141503,ENSG00000141736,ENSG00000145868,ENSG00000158092…	ETV1,CDKL5,HDAC9,SEMA3C,SPG11,COBL,RAPGEF1,UNC5B,TRPV4,BCL6,VAMP7,MACF1,CLIP1,NUMB,KIDINS220,FAIM2,STXBP1,IFT172,BMPR1B,BBS4,SSH2,MINK1,ERBB2,FBXO38,NCK1,CUL4B,PDLIM5,PAPD4,MECP2,NDNF,PTPRM,SPTBN2,NR2F1,ITSN2,ATL1,FMN1,CYFIP1,ADRA2B
GO:0010639	0.05888	1.76387	6.42514	11	260	negative regulation of organelle organization	0.269265	ENSG00000006747,ENSG00000071242,ENSG00000089163,ENSG00000092330,ENSG00000108946,ENSG00000138594,ENSG00000140463,ENSG00000151491,ENSG00000158195,ENSG00000171100,ENSG00000173898	SCIN,RPS6KA2,SIRT4,TINF2,PRKAR1A,TMOD3,BBS4,EPS8,WASF2,MTM1,SPTBN2
GO:0051604	0.05888	1.76387	6.42514	11	260	protein maturation	0.269265	ENSG00000071242,ENSG00000072062,ENSG00000089163,ENSG00000102910,ENSG00000110330,ENSG00000116133,ENSG00000129128,ENSG00000138002,ENSG00000142875,ENSG00000154309,ENSG00000198363	RPS6KA2,PRKACA,SIRT4,LONP2,BIRC2,DHCR24,SPCS3,IFT172,PRKACB,DISP1,ASPH
GO:0006793	0.0593223	1.22244	74.334	87	3008	phosphorus metabolic process	0.270773	ENSG00000004799,ENSG00000005882,ENSG00000008086,ENSG00000051382,ENSG00000052795,ENSG00000058091,ENSG00000067064,ENSG00000071242,ENSG00000072062,ENSG00000075711,ENSG00000077232,ENSG00000088888,ENSG00000100330,ENSG00000100439,ENSG00000102580,ENSG00000107263,ENSG00000108389,ENSG00000108946,ENSG00000109452,ENSG00000111199,ENSG00000111846,ENSG00000113163,ENSG00000114166,ENSG00000115380,ENSG00000117461…	PDK4,PDK2,CDKL5,PIK3CB,FNIP2,CDK14,IDI1,RPS6KA2,PRKACA,DLG1,DNAJC10,MAVS,MTMR3,ABHD4,DNAJC3,RAPGEF1,MTMR4,PRKAR1A,INPP4B,TRPV4,GCNT2,COL4A3BP,KAT2B,EFEMP1,PIK3R3,TJP2,TRIM6,PIK3CA,DYRK2,TRAF7,PRKAA1,PIK3C2B,KIDINS220,TAOK3,PNPLA8,SPRY2,ARRB1,PPM1B,PLCE1,BMPR1B,PAPSS1,PELI2,SSH2,GNAL,MINK1,ERBB2,PRKACB,CTTNBP2NL,PI4KB,LIMD1,RASA1,IGFBP3,PIP4K2A,FOXO1,FER,CNKSR3,PTPRN2,DEPTOR,TAB3,NCK1,SYNJ1,MORC3,…
GO:0031333	0.0593268	2.25216	2.76775	6	112	negative regulation of protein complex assembly	0.270773	ENSG00000006747,ENSG00000110330,ENSG00000138594,ENSG00000140463,ENSG00000151491,ENSG00000173898	SCIN,BIRC2,TMOD3,BBS4,EPS8,SPTBN2
GO:0098602	0.0606501	1.42073	18.8306	26	762	single organism cell adhesion	0.276541	ENSG00000026950,ENSG00000046604,ENSG00000051382,ENSG00000064201,ENSG00000075711,ENSG00000107263,ENSG00000108946,ENSG00000111199,ENSG00000111846,ENSG00000113916,ENSG00000116678,ENSG00000121879,ENSG00000132589,ENSG00000136854,ENSG00000141503,ENSG00000141736,ENSG00000150760,ENSG00000151422,ENSG00000154639,ENSG00000158092,ENSG00000160255,ENSG00000161905,ENSG00000164442,ENSG00000165699,ENSG00000186951…	BTN3A1,DSG2,PIK3CB,TSPAN32,DLG1,RAPGEF1,PRKAR1A,TRPV4,GCNT2,BCL6,LEPR,PIK3CA,FLOT2,STXBP1,MINK1,ERBB2,DOCK1,FER,CXADR,NCK1,ITGB2,ALOX15,CITED2,TSC1,PPARA,CD2AP
GO:0002684	0.0612735	1.3842	22.315	30	903	positive regulation of immune system process	0.279108	ENSG00000006747,ENSG00000026950,ENSG00000051382,ENSG00000072062,ENSG00000088888,ENSG00000106299,ENSG00000110330,ENSG00000111199,ENSG00000112851,ENSG00000113916,ENSG00000115594,ENSG00000121236,ENSG00000121879,ENSG00000124333,ENSG00000129657,ENSG00000132589,ENSG00000142875,ENSG00000150760,ENSG00000151422,ENSG00000157625,ENSG00000158092,ENSG00000158195,ENSG00000160255,ENSG00000166747,ENSG00000170458…	SCIN,BTN3A1,PIK3CB,PRKACA,MAVS,WASL,BIRC2,TRPV4,ERBB2IP,BCL6,IL1R1,TRIM6,PIK3CA,VAMP7,SEC14L1,FLOT2,PRKACB,DOCK1,FER,TAB3,NCK1,WASF2,ITGB2,AP1G1,CD14,PRKCE,RPS6KA3,HCAR2,LGR4,CYFIP1
GO:0010677	0.0627411	3.5005	0.914347	3	37	negative regulation of cellular carbohydrate metabolic process	0.284673	ENSG00000082196,ENSG00000116678,ENSG00000186951	C1QTNF3,LEPR,PPARA
GO:0019068	0.0627411	3.5005	0.914347	3	37	virion assembly	0.284673	ENSG00000115561,ENSG00000119541,ENSG00000172780	CHMP3,VPS4B,RAB43
GO:1902743	0.0627411	3.5005	0.914347	3	37	regulation of lamellipodium organization	0.284673	ENSG00000141298,ENSG00000151422,ENSG00000158195	SSH2,FER,WASF2
GO:2000677	0.0627411	3.5005	0.914347	3	37	regulation of transcription regulatory region DNA binding	0.284673	ENSG00000121236,ENSG00000132326,ENSG00000186951	TRIM6,PER2,PPARA
GO:0042327	0.0633804	1.37919	22.3892	30	906	positive regulation of phosphorylation	0.28657	ENSG00000051382,ENSG00000052795,ENSG00000072062,ENSG00000075711,ENSG00000088888,ENSG00000107263,ENSG00000108946,ENSG00000111199,ENSG00000111846,ENSG00000121236,ENSG00000121879,ENSG00000131653,ENSG00000132356,ENSG00000134313,ENSG00000135090,ENSG00000136158,ENSG00000137486,ENSG00000138193,ENSG00000139946,ENSG00000141503,ENSG00000141736,ENSG00000142875,ENSG00000146674,ENSG00000157625,ENSG00000161905…	PIK3CB,FNIP2,PRKACA,DLG1,MAVS,RAPGEF1,PRKAR1A,TRPV4,GCNT2,TRIM6,PIK3CA,TRAF7,PRKAA1,KIDINS220,TAOK3,SPRY2,ARRB1,PLCE1,PELI2,MINK1,ERBB2,PRKACB,IGFBP3,TAB3,ALOX15,AKAP13,PRKCE,SMYD3,MAP3K5,ADRA2B
GO:0007368	0.0635466	2.21018	2.81718	6	114	determination of left/right symmetry	0.28657	ENSG00000100280,ENSG00000136169,ENSG00000138002,ENSG00000140463,ENSG00000154309,ENSG00000164442	AP1B1,SETDB2,IFT172,BBS4,DISP1,CITED2
GO:0051588	0.0638624	2.78689	1.50744	4	61	regulation of neurotransmitter transport	0.28657	ENSG00000115839,ENSG00000132326,ENSG00000136854,ENSG00000198722	RAB3GAP1,PER2,STXBP1,UNC13B
GO:0071900	0.0643072	1.54021	11.3429	17	459	regulation of protein serine/threonine kinase activity	0.28657	ENSG00000051382,ENSG00000107263,ENSG00000108946,ENSG00000114166,ENSG00000131653,ENSG00000132356,ENSG00000134313,ENSG00000135090,ENSG00000136158,ENSG00000137486,ENSG00000138193,ENSG00000141736,ENSG00000157625,ENSG00000164056,ENSG00000170776,ENSG00000197442,ENSG00000274286	PIK3CB,RAPGEF1,PRKAR1A,KAT2B,TRAF7,PRKAA1,KIDINS220,TAOK3,SPRY2,ARRB1,PLCE1,ERBB2,TAB3,SPRY1,AKAP13,MAP3K5,ADRA2B
GO:0016485	0.0644513	1.78893	5.75792	10	233	protein processing	0.28657	ENSG00000071242,ENSG00000072062,ENSG00000089163,ENSG00000102910,ENSG00000110330,ENSG00000116133,ENSG00000129128,ENSG00000138002,ENSG00000142875,ENSG00000198363	RPS6KA2,PRKACA,SIRT4,LONP2,BIRC2,DHCR24,SPCS3,IFT172,PRKACB,ASPH
GO:0006906	0.0646607	2.04916	3.53383	7	143	vesicle fusion	0.28657	ENSG00000108239,ENSG00000124333,ENSG00000136854,ENSG00000160695,ENSG00000167202,ENSG00000198863,ENSG00000204634	TBC1D12,VAMP7,STXBP1,VPS11,TBC1D2B,RUNDC1,TBC1D8
GO:0000920	0.0648935	5.28293	0.420106	2	17	cell separation after cytokinesis	0.28657	ENSG00000115561,ENSG00000119541	CHMP3,VPS4B
GO:0010661	0.0648935	5.28293	0.420106	2	17	positive regulation of muscle cell apoptotic process	0.28657	ENSG00000137486,ENSG00000197442	ARRB1,MAP3K5
GO:0031112	0.0648935	5.28293	0.420106	2	17	positive regulation of microtubule polymerization or depolymerization	0.28657	ENSG00000111199,ENSG00000130779	TRPV4,CLIP1
GO:0032682	0.0648935	5.28293	0.420106	2	17	negative regulation of chemokine production	0.28657	ENSG00000082196,ENSG00000112851	C1QTNF3,ERBB2IP
GO:0051642	0.0648935	5.28293	0.420106	2	17	centrosome localization	0.28657	ENSG00000075711,ENSG00000100242	DLG1,SUN2
GO:0070633	0.0648935	5.28293	0.420106	2	17	transepithelial transport	0.28657	ENSG00000154639,ENSG00000168710	CXADR,AHCYL1
GO:0072643	0.0648935	5.28293	0.420106	2	17	interferon-gamma secretion	0.28657	ENSG00000026950,ENSG00000186470	BTN3A1,BTN3A2
GO:1902170	0.0648935	5.28293	0.420106	2	17	cellular response to reactive nitrogen species	0.28657	ENSG00000150907,ENSG00000197442	FOXO1,MAP3K5
GO:1903830	0.0648935	5.28293	0.420106	2	17	magnesium ion transmembrane transport	0.28657	ENSG00000102158,ENSG00000104723	MAGT1,TUSC3
GO:2000641	0.0648935	5.28293	0.420106	2	17	regulation of early endosome to late endosome transport	0.28657	ENSG00000115561,ENSG00000160695	CHMP3,VPS11
GO:2000678	0.0648935	5.28293	0.420106	2	17	negative regulation of transcription regulatory region DNA binding	0.28657	ENSG00000132326,ENSG00000186951	PER2,PPARA
GO:0002768	0.0653308	1.61312	8.92107	14	361	immune response-regulating cell surface receptor signaling pathway	0.28657	ENSG00000026950,ENSG00000051382,ENSG00000072062,ENSG00000106299,ENSG00000121879,ENSG00000142875,ENSG00000150760,ENSG00000151422,ENSG00000157625,ENSG00000158092,ENSG00000158195,ENSG00000162896,ENSG00000171132,ENSG00000273749	BTN3A1,PIK3CB,PRKACA,WASL,PIK3CA,PRKACB,DOCK1,FER,TAB3,NCK1,WASF2,PIGR,PRKCE,CYFIP1
GO:0050680	0.0657211	2.18977	2.84189	6	115	negative regulation of epithelial cell proliferation	0.28657	ENSG00000075711,ENSG00000092330,ENSG00000111424,ENSG00000138002,ENSG00000170477,ENSG00000173482	DLG1,TINF2,VDR,IFT172,KRT4,PTPRM
GO:0071705	0.0657484	1.42818	17.2738	24	699	nitrogen compound transport	0.28657	ENSG00000089163,ENSG00000111199,ENSG00000113163,ENSG00000115840,ENSG00000124333,ENSG00000129353,ENSG00000129657,ENSG00000132326,ENSG00000136231,ENSG00000137486,ENSG00000154309,ENSG00000155093,ENSG00000155465,ENSG00000160294,ENSG00000165699,ENSG00000166263,ENSG00000169057,ENSG00000170745,ENSG00000171132,ENSG00000172071,ENSG00000181035,ENSG00000185339,ENSG00000211584,ENSG00000274286	SIRT4,TRPV4,COL4A3BP,SLC25A12,VAMP7,SLC44A2,SEC14L1,PER2,IGF2BP3,ARRB1,DISP1,PTPRN2,SLC7A7,MCM3AP,TSC1,STXBP4,MECP2,KCNS3,PRKCE,EIF2AK3,SLC25A42,TCN2,SLC48A1,ADRA2B
GO:2000026	0.0662239	1.2767	41.2939	51	1671	regulation of multicellular organismal development	0.28657	ENSG00000006747,ENSG00000008086,ENSG00000048052,ENSG00000072062,ENSG00000075223,ENSG00000075711,ENSG00000100592,ENSG00000106078,ENSG00000107263,ENSG00000111199,ENSG00000111348,ENSG00000111424,ENSG00000111846,ENSG00000113916,ENSG00000115380,ENSG00000117139,ENSG00000119535,ENSG00000124151,ENSG00000124333,ENSG00000127603,ENSG00000130779,ENSG00000132326,ENSG00000132356,ENSG00000133961,ENSG00000134313…	SCIN,CDKL5,HDAC9,PRKACA,SEMA3C,DLG1,DAAM1,COBL,RAPGEF1,TRPV4,ARHGDIB,VDR,GCNT2,BCL6,EFEMP1,KDM5B,CSF3R,NCOA3,VAMP7,MACF1,CLIP1,PER2,PRKAA1,NUMB,KIDINS220,BMPR1B,SSH2,ERBB2,PRKACB,FBXO38,NCK1,ITGB2,JAK1,PDLIM5,PRICKLE2,SPRY1,CITED2,HIF1AN,MECP2,MTM1,EIF2AK3,NDNF,PTPRM,NR2F1,NCMAP,MED12,BCL9L,NBR1,ITSN2,LGR4,ADRA2B
GO:0050900	0.0665074	1.60839	8.94578	14	362	leukocyte migration	0.28657	ENSG00000051382,ENSG00000106299,ENSG00000107862,ENSG00000111199,ENSG00000115594,ENSG00000119535,ENSG00000121879,ENSG00000151422,ENSG00000151491,ENSG00000154639,ENSG00000155465,ENSG00000159842,ENSG00000160255,ENSG00000186716	PIK3CB,WASL,GBF1,TRPV4,IL1R1,CSF3R,PIK3CA,FER,EPS8,CXADR,SLC7A7,ABR,ITGB2,BCR
GO:0007229	0.0668505	2.39439	2.17466	5	88	integrin-mediated signaling pathway	0.28657	ENSG00000064201,ENSG00000105855,ENSG00000112851,ENSG00000150760,ENSG00000160255	TSPAN32,ITGB8,ERBB2IP,DOCK1,ITGB2
GO:0036503	0.0668505	2.39439	2.17466	5	88	ERAD pathway	0.28657	ENSG00000068912,ENSG00000077232,ENSG00000116406,ENSG00000155313,ENSG00000204463	ERLEC1,DNAJC10,EDEM3,USP25,BAG6
GO:1990266	0.0668505	2.39439	2.17466	5	88	neutrophil migration	0.28657	ENSG00000107862,ENSG00000115594,ENSG00000119535,ENSG00000154639,ENSG00000160255	GBF1,IL1R1,CSF3R,CXADR,ITGB2
GO:0051445	0.0669205	3.40028	0.93906	3	38	regulation of meiotic cell cycle	0.28657	ENSG00000071242,ENSG00000108946,ENSG00000142875	RPS6KA2,PRKAR1A,PRKACB
GO:1990089	0.0669205	3.40028	0.93906	3	38	response to nerve growth factor	0.28657	ENSG00000107263,ENSG00000114331,ENSG00000134313	RAPGEF1,ACAP2,KIDINS220
GO:0006901	0.0669979	2.73867	1.53215	4	62	vesicle coating	0.28657	ENSG00000073969,ENSG00000107862,ENSG00000113615,ENSG00000170348	NSF,GBF1,SEC24A,TMED10
GO:0043900	0.0676979	1.60368	8.97049	14	363	regulation of multi-organism process	0.28657	ENSG00000064201,ENSG00000080561,ENSG00000088888,ENSG00000100280,ENSG00000110330,ENSG00000111348,ENSG00000115561,ENSG00000119541,ENSG00000121236,ENSG00000129657,ENSG00000138032,ENSG00000166747,ENSG00000175115,ENSG00000185591	TSPAN32,MID2,MAVS,AP1B1,BIRC2,ARHGDIB,CHMP3,VPS4B,TRIM6,SEC14L1,PPM1B,AP1G1,PACS1,SP1
GO:0009893	0.0684692	1.21326	72.9995	85	2954	positive regulation of metabolic process	0.28657	ENSG00000006468,ENSG00000051382,ENSG00000052795,ENSG00000071242,ENSG00000072062,ENSG00000073969,ENSG00000075711,ENSG00000078687,ENSG00000085832,ENSG00000088888,ENSG00000089163,ENSG00000092330,ENSG00000102471,ENSG00000102580,ENSG00000105855,ENSG00000107263,ENSG00000108175,ENSG00000108557,ENSG00000108946,ENSG00000110330,ENSG00000111199,ENSG00000111424,ENSG00000111846,ENSG00000113916,ENSG00000114166…	ETV1,PIK3CB,FNIP2,RPS6KA2,PRKACA,NSF,DLG1,TNRC6C,EPS15,MAVS,SIRT4,TINF2,NDFIP2,DNAJC3,ITGB8,RAPGEF1,ZMIZ1,RAI1,PRKAR1A,BIRC2,TRPV4,VDR,GCNT2,BCL6,KAT2B,RAB3GAP1,KDM5B,IRF2BPL,HOXB5,APAF1,TRIM6,PIK3CA,NCOA3,HIVEP3,DYRK2,LDLR,TRAF7,PRKAA1,KIDINS220,TAOK3,SPRY2,ARRB1,PLCE1,BMPR1B,PELI2,GNAL,MINK1,ERBB2,PRKACB,IGFBP3,FOXO1,THRB,TAB3,BRE,NCK1,CUL4B,ITGB2,VPS11,ALOX15,CITED2,IRF2,MECP2,PARM1,AKAP13,PRK…
GO:0043491	0.0685709	2.01922	3.58325	7	145	protein kinase B signaling	0.28657	ENSG00000075711,ENSG00000107263,ENSG00000111846,ENSG00000121879,ENSG00000133056,ENSG00000136158,ENSG00000171100	DLG1,RAPGEF1,GCNT2,PIK3CA,PIK3C2B,SPRY2,MTM1
GO:0055001	0.0685709	2.01922	3.58325	7	145	muscle cell development	0.28657	ENSG00000048052,ENSG00000108946,ENSG00000138594,ENSG00000154639,ENSG00000163110,ENSG00000170776,ENSG00000185420	HDAC9,PRKAR1A,TMOD3,CXADR,PDLIM5,AKAP13,SMYD3
GO:0051051	0.0688889	1.54648	10.6262	16	430	negative regulation of transport	0.28657	ENSG00000068912,ENSG00000082196,ENSG00000089163,ENSG00000102471,ENSG00000119541,ENSG00000127334,ENSG00000132356,ENSG00000138032,ENSG00000143079,ENSG00000156675,ENSG00000159842,ENSG00000171132,ENSG00000186716,ENSG00000198911,ENSG00000205213,ENSG00000274286	ERLEC1,C1QTNF3,SIRT4,NDFIP2,VPS4B,DYRK2,PRKAA1,PPM1B,CTTNBP2NL,RAB11FIP1,ABR,PRKCE,BCR,SREBF2,LGR4,ADRA2B
GO:0009791	0.0694673	2.36574	2.19938	5	89	post-embryonic development	0.28657	ENSG00000075223,ENSG00000115380,ENSG00000117139,ENSG00000159256,ENSG00000169057	SEMA3C,EFEMP1,KDM5B,MORC3,MECP2
GO:0045446	0.0694673	2.36574	2.19938	5	89	endothelial cell differentiation	0.28657	ENSG00000107263,ENSG00000119139,ENSG00000120075,ENSG00000130396,ENSG00000152939	RAPGEF1,TJP2,HOXB5,MLLT4,MARVELD2
GO:0090317	0.0694673	2.36574	2.19938	5	89	negative regulation of intracellular protein transport	0.28657	ENSG00000068912,ENSG00000082196,ENSG00000089163,ENSG00000127334,ENSG00000138032	ERLEC1,C1QTNF3,SIRT4,DYRK2,PPM1B
GO:1903038	0.0694673	2.36574	2.19938	5	89	negative regulation of leukocyte cell-cell adhesion	0.28657	ENSG00000075711,ENSG00000108946,ENSG00000113916,ENSG00000141736,ENSG00000186951	DLG1,PRKAR1A,BCL6,ERBB2,PPARA
GO:1904951	0.0699033	1.5019	12.3066	18	498	positive regulation of establishment of protein localization	0.28657	ENSG00000072062,ENSG00000075711,ENSG00000082196,ENSG00000088888,ENSG00000111199,ENSG00000113615,ENSG00000116574,ENSG00000120756,ENSG00000121236,ENSG00000137486,ENSG00000141736,ENSG00000143457,ENSG00000160695,ENSG00000170458,ENSG00000171132,ENSG00000182782,ENSG00000198722,ENSG00000198911	PRKACA,DLG1,C1QTNF3,MAVS,TRPV4,SEC24A,RHOU,PLS1,TRIM6,ARRB1,ERBB2,GOLPH3L,VPS11,CD14,PRKCE,HCAR2,UNC13B,SREBF2
GO:0051338	0.0700101	1.36436	22.6116	30	915	regulation of transferase activity	0.28657	ENSG00000051382,ENSG00000072062,ENSG00000075711,ENSG00000092330,ENSG00000102580,ENSG00000107263,ENSG00000108946,ENSG00000114166,ENSG00000117461,ENSG00000121879,ENSG00000131653,ENSG00000132356,ENSG00000134313,ENSG00000135090,ENSG00000136158,ENSG00000137486,ENSG00000138193,ENSG00000141736,ENSG00000142875,ENSG00000155792,ENSG00000157625,ENSG00000158092,ENSG00000160445,ENSG00000164056,ENSG00000165699…	PIK3CB,PRKACA,DLG1,TINF2,DNAJC3,RAPGEF1,PRKAR1A,KAT2B,PIK3R3,PIK3CA,TRAF7,PRKAA1,KIDINS220,TAOK3,SPRY2,ARRB1,PLCE1,ERBB2,PRKACB,DEPTOR,TAB3,NCK1,ZER1,SPRY1,TSC1,PARM1,AKAP13,SMYD3,MAP3K5,ADRA2B
GO:0051494	0.0701995	2.15005	2.89131	6	117	negative regulation of cytoskeleton organization	0.28657	ENSG00000006747,ENSG00000138594,ENSG00000140463,ENSG00000151491,ENSG00000158195,ENSG00000173898	SCIN,TMOD3,BBS4,EPS8,WASF2,SPTBN2
GO:1900006	0.0702118	2.69209	1.55686	4	63	positive regulation of dendrite development	0.28657	ENSG00000008086,ENSG00000106078,ENSG00000124333,ENSG00000130779	CDKL5,COBL,VAMP7,CLIP1
GO:0048513	0.0704809	1.20879	75.0012	87	3035	animal organ development	0.28657	ENSG00000006468,ENSG00000006747,ENSG00000025796,ENSG00000046604,ENSG00000048052,ENSG00000071242,ENSG00000075223,ENSG00000075711,ENSG00000100280,ENSG00000100592,ENSG00000100852,ENSG00000105738,ENSG00000105855,ENSG00000106078,ENSG00000107798,ENSG00000107816,ENSG00000108175,ENSG00000108946,ENSG00000110330,ENSG00000111424,ENSG00000111707,ENSG00000111846,ENSG00000113163,ENSG00000113916,ENSG00000115234…	ETV1,SCIN,SEC63,DSG2,HDAC9,RPS6KA2,SEMA3C,DLG1,AP1B1,DAAM1,ARHGAP5,SIPA1L3,ITGB8,COBL,LIPA,LZTS2,ZMIZ1,PRKAR1A,BIRC2,VDR,SUDS3,GCNT2,COL4A3BP,BCL6,SNX17,EFEMP1,RAB3GAP1,DHCR24,LEPR,KDM5B,CSF3R,HOXB5,APAF1,PIK3CA,NCOA3,BBS2,HIVEP3,PRKAA1,NUMB,FAIM2,SPRY2,SETDB2,ARRB1,IFT172,PLCE1,TMOD3,BMPR1B,BBS4,ERBB2,ST14,PIP4K2A,FOXO1,THRB,DISP1,CXADR,WASF2,ABR,ALOX15,PDLIM5,PRICKLE2,RBM47,SPRY1,PAPD4,CITED2,T…
GO:0070372	0.0704813	1.75696	5.85677	10	237	regulation of ERK1 and ERK2 cascade	0.28657	ENSG00000075711,ENSG00000107263,ENSG00000111199,ENSG00000111846,ENSG00000136158,ENSG00000137486,ENSG00000141736,ENSG00000153721,ENSG00000161905,ENSG00000164056	DLG1,RAPGEF1,TRPV4,GCNT2,SPRY2,ARRB1,ERBB2,CNKSR3,ALOX15,SPRY1
GO:0044257	0.0706534	1.42679	16.5571	23	670	cellular protein catabolic process	0.28657	ENSG00000072062,ENSG00000077232,ENSG00000102580,ENSG00000102910,ENSG00000103429,ENSG00000107185,ENSG00000110330,ENSG00000114316,ENSG00000116406,ENSG00000119541,ENSG00000135093,ENSG00000137486,ENSG00000138641,ENSG00000151148,ENSG00000155313,ENSG00000158290,ENSG00000160695,ENSG00000170185,ENSG00000171100,ENSG00000186591,ENSG00000198087,ENSG00000204463,ENSG00000264522	PRKACA,DNAJC10,DNAJC3,LONP2,BFAR,RGP1,BIRC2,USP4,EDEM3,VPS4B,USP30,ARRB1,HERC3,UBE3B,USP25,CUL4B,VPS11,USP38,MTM1,UBE2H,CD2AP,BAG6,OTUD7B
GO:0038128	0.0712235	3.30562	0.963772	3	39	ERBB2 signaling pathway	0.28657	ENSG00000112851,ENSG00000121879,ENSG00000141736	ERBB2IP,PIK3CA,ERBB2
GO:0051653	0.0712235	3.30562	0.963772	3	39	spindle localization	0.28657	ENSG00000106299,ENSG00000136158,ENSG00000164056	WASL,SPRY2,SPRY1
GO:0060338	0.0712235	3.30562	0.963772	3	39	regulation of type I interferon-mediated signaling pathway	0.28657	ENSG00000088888,ENSG00000121236,ENSG00000162434	MAVS,TRIM6,JAK1
GO:0071377	0.0712235	3.30562	0.963772	3	39	cellular response to glucagon stimulus	0.28657	ENSG00000072062,ENSG00000108946,ENSG00000142875	PRKACA,PRKAR1A,PRKACB
GO:0034248	0.0713543	1.58971	9.04463	14	366	regulation of cellular amide metabolic process	0.28657	ENSG00000078687,ENSG00000102580,ENSG00000132326,ENSG00000132356,ENSG00000136231,ENSG00000138593,ENSG00000141736,ENSG00000144791,ENSG00000158092,ENSG00000165699,ENSG00000170348,ENSG00000172071,ENSG00000177189,ENSG00000196730	TNRC6C,DNAJC3,PER2,PRKAA1,IGF2BP3,SECISBP2L,ERBB2,LIMD1,NCK1,TSC1,TMED10,EIF2AK3,RPS6KA3,DAPK1
GO:0031579	0.0718457	4.95244	0.444818	2	18	membrane raft organization	0.28657	ENSG00000075711,ENSG00000132589	DLG1,FLOT2
GO:0034114	0.0718457	4.95244	0.444818	2	18	regulation of heterotypic cell-cell adhesion	0.28657	ENSG00000111846,ENSG00000161905	GCNT2,ALOX15
GO:0035357	0.0718457	4.95244	0.444818	2	18	peroxisome proliferator activated receptor signaling pathway	0.28657	ENSG00000161905,ENSG00000164442	ALOX15,CITED2
GO:0044030	0.0718457	4.95244	0.444818	2	18	regulation of DNA methylation	0.28657	ENSG00000121879,ENSG00000196199	PIK3CA,MPHOSPH8
GO:0044381	0.0718457	4.95244	0.444818	2	18	glucose import in response to insulin stimulus	0.28657	ENSG00000117461,ENSG00000132356	PIK3R3,PRKAA1
GO:0046337	0.0718457	4.95244	0.444818	2	18	phosphatidylethanolamine metabolic process	0.28657	ENSG00000135241,ENSG00000161905	PNPLA8,ALOX15
GO:0050687	0.0718457	4.95244	0.444818	2	18	negative regulation of defense response to virus	0.28657	ENSG00000129657,ENSG00000138032	SEC14L1,PPM1B
GO:0055094	0.0718457	4.95244	0.444818	2	18	response to lipoprotein particle	0.28657	ENSG00000160255,ENSG00000198911	ITGB2,SREBF2
GO:0060055	0.0718457	4.95244	0.444818	2	18	angiogenesis involved in wound healing	0.28657	ENSG00000051382,ENSG00000173376	PIK3CB,NDNF
GO:2001273	0.0718457	4.95244	0.444818	2	18	regulation of glucose import in response to insulin stimulus	0.28657	ENSG00000117461,ENSG00000132356	PIK3R3,PRKAA1
GO:0006112	0.0721399	2.33777	2.22409	5	90	energy reserve metabolic process	0.28657	ENSG00000116678,ENSG00000127334,ENSG00000132326,ENSG00000173281,ENSG00000198380	LEPR,DYRK2,PER2,PPP1R3B,GFPT1
GO:0031323	0.0721697	1.16888	141.551	156	5728	regulation of cellular metabolic process	0.28657	ENSG00000004799,ENSG00000005882,ENSG00000006468,ENSG00000007237,ENSG00000048052,ENSG00000051382,ENSG00000052795,ENSG00000055609,ENSG00000072062,ENSG00000073969,ENSG00000075711,ENSG00000076108,ENSG00000077232,ENSG00000078687,ENSG00000080561,ENSG00000082196,ENSG00000084234,ENSG00000085832,ENSG00000088888,ENSG00000089163,ENSG00000092330,ENSG00000100665,ENSG00000102471,ENSG00000102580,ENSG00000102910…	PDK4,PDK2,ETV1,GAS7,HDAC9,PIK3CB,FNIP2,KMT2C,PRKACA,NSF,DLG1,BAZ2A,DNAJC10,TNRC6C,MID2,C1QTNF3,APLP2,EPS15,MAVS,SIRT4,TINF2,SERPINA4,NDFIP2,DNAJC3,LONP2,TAX1BP1,WASL,KDM4C,RGP1,RAPGEF1,ZMIZ1,RAI1,PRKAR1A,BIRC2,TRPV4,VDR,SUDS3,HCFC2,GCNT2,ERBB2IP,SEC24A,BCL6,KAT2B,USP4,EFEMP1,RAB3GAP1,DHCR24,LEPR,ETV3,KDM5B,PIK3R3,RCOR3,ANKRD13C,IRF2BPL,HOXB5,APAF1,TRIM6,PIK3CA,NCOA3,HIVEP3,DYRK2,LDLR,TRAF7,PER2,P…
GO:0000023	0.0723235	19.7786	0.0741363	1	3	maltose metabolic process	0.28657	ENSG00000257335	MGAM
GO:0003350	0.0723235	19.7786	0.0741363	1	3	pulmonary myocardium development	0.28657	ENSG00000075223	SEMA3C
GO:0006208	0.0723235	19.7786	0.0741363	1	3	pyrimidine nucleobase catabolic process	0.28657	ENSG00000188641	DPYD
GO:0006210	0.0723235	19.7786	0.0741363	1	3	thymine catabolic process	0.28657	ENSG00000188641	DPYD
GO:0007231	0.0723235	19.7786	0.0741363	1	3	osmosensory signaling pathway	0.28657	ENSG00000111199	TRPV4
GO:0007412	0.0723235	19.7786	0.0741363	1	3	axon target recognition	0.28657	ENSG00000136854	STXBP1
GO:0007619	0.0723235	19.7786	0.0741363	1	3	courtship behavior	0.28657	ENSG00000151090	THRB
GO:0010899	0.0723235	19.7786	0.0741363	1	3	regulation of phosphatidylcholine catabolic process	0.28657	ENSG00000130164	LDLR
GO:0010979	0.0723235	19.7786	0.0741363	1	3	regulation of vitamin D 24-hydroxylase activity	0.28657	ENSG00000111424	VDR
GO:0010980	0.0723235	19.7786	0.0741363	1	3	positive regulation of vitamin D 24-hydroxylase activity	0.28657	ENSG00000111424	VDR
GO:0015866	0.0723235	19.7786	0.0741363	1	3	ADP transport	0.28657	ENSG00000181035	SLC25A42
GO:0016554	0.0723235	19.7786	0.0741363	1	3	cytidine to uridine editing	0.28657	ENSG00000163694	RBM47
GO:0018242	0.0723235	19.7786	0.0741363	1	3	protein O-linked glycosylation via serine	0.28657	ENSG00000115339	GALNT3
GO:0019065	0.0723235	19.7786	0.0741363	1	3	receptor-mediated endocytosis of virus by host cell	0.28657	ENSG00000085832	EPS15
GO:0019859	0.0723235	19.7786	0.0741363	1	3	thymine metabolic process	0.28657	ENSG00000188641	DPYD
GO:0019860	0.0723235	19.7786	0.0741363	1	3	uracil metabolic process	0.28657	ENSG00000188641	DPYD
GO:0030886	0.0723235	19.7786	0.0741363	1	3	negative regulation of myeloid dendritic cell activation	0.28657	ENSG00000064201	TSPAN32
GO:0031630	0.0723235	19.7786	0.0741363	1	3	regulation of synaptic vesicle fusion to presynaptic membrane	0.28657	ENSG00000136854	STXBP1
GO:0032439	0.0723235	19.7786	0.0741363	1	3	endosome localization	0.28657	ENSG00000167306	MYO5B
GO:0032911	0.0723235	19.7786	0.0741363	1	3	negative regulation of transforming growth factor beta1 production	0.28657	ENSG00000198087	CD2AP
GO:0035526	0.0723235	19.7786	0.0741363	1	3	retrograde transport, plasma membrane to Golgi	0.28657	ENSG00000172780	RAB43
GO:0035962	0.0723235	19.7786	0.0741363	1	3	response to interleukin-13	0.28657	ENSG00000161905	ALOX15
GO:0036166	0.0723235	19.7786	0.0741363	1	3	phenotypic switching	0.28657	ENSG00000185591	SP1
GO:0036215	0.0723235	19.7786	0.0741363	1	3	response to stem cell factor	0.28657	ENSG00000151422	FER
GO:0036216	0.0723235	19.7786	0.0741363	1	3	cellular response to stem cell factor stimulus	0.28657	ENSG00000151422	FER
GO:0036506	0.0723235	19.7786	0.0741363	1	3	maintenance of unfolded protein	0.28657	ENSG00000204463	BAG6
GO:0038109	0.0723235	19.7786	0.0741363	1	3	Kit signaling pathway	0.28657	ENSG00000151422	FER
GO:0038123	0.0723235	19.7786	0.0741363	1	3	toll-like receptor TLR1:TLR2 signaling pathway	0.28657	ENSG00000170458	CD14
GO:0038183	0.0723235	19.7786	0.0741363	1	3	bile acid signaling pathway	0.28657	ENSG00000111424	VDR
GO:0042369	0.0723235	19.7786	0.0741363	1	3	vitamin D catabolic process	0.28657	ENSG00000019186	CYP24A1
GO:0043402	0.0723235	19.7786	0.0741363	1	3	glucocorticoid mediated signaling pathway	0.28657	ENSG00000170776	AKAP13
GO:0043578	0.0723235	19.7786	0.0741363	1	3	nuclear matrix organization	0.28657	ENSG00000100242	SUN2
GO:0046121	0.0723235	19.7786	0.0741363	1	3	deoxyribonucleoside catabolic process	0.28657	ENSG00000188641	DPYD
GO:0048294	0.0723235	19.7786	0.0741363	1	3	negative regulation of isotype switching to IgE isotypes	0.28657	ENSG00000113916	BCL6
GO:0050893	0.0723235	19.7786	0.0741363	1	3	sensory processing	0.28657	ENSG00000140463	BBS4
GO:0050904	0.0723235	19.7786	0.0741363	1	3	diapedesis	0.28657	ENSG00000151422	FER
GO:0051660	0.0723235	19.7786	0.0741363	1	3	establishment of centrosome localization	0.28657	ENSG00000075711	DLG1
GO:0051933	0.0723235	19.7786	0.0741363	1	3	amino acid neurotransmitter reuptake	0.28657	ENSG00000132326	PER2
GO:0051935	0.0723235	19.7786	0.0741363	1	3	glutamate reuptake	0.28657	ENSG00000132326	PER2
GO:0060051	0.0723235	19.7786	0.0741363	1	3	negative regulation of protein glycosylation	0.28657	ENSG00000092330	TINF2
GO:0060057	0.0723235	19.7786	0.0741363	1	3	apoptotic process involved in mammary gland involution	0.28657	ENSG00000111424	VDR
GO:0060058	0.0723235	19.7786	0.0741363	1	3	positive regulation of apoptotic process involved in mammary gland involution	0.28657	ENSG00000111424	VDR
GO:0060399	0.0723235	19.7786	0.0741363	1	3	positive regulation of growth hormone receptor signaling pathway	0.28657	ENSG00000204406	MBD5
GO:0060671	0.0723235	19.7786	0.0741363	1	3	epithelial cell differentiation involved in embryonic placenta development	0.28657	ENSG00000149418	ST14
GO:0060672	0.0723235	19.7786	0.0741363	1	3	epithelial cell morphogenesis involved in placental branching	0.28657	ENSG00000149418	ST14
GO:0060763	0.0723235	19.7786	0.0741363	1	3	mammary duct terminal end bud growth	0.28657	ENSG00000117139	KDM5B
GO:0061738	0.0723235	19.7786	0.0741363	1	3	late endosomal microautophagy	0.28657	ENSG00000119541	VPS4B
GO:0070358	0.0723235	19.7786	0.0741363	1	3	actin polymerization-dependent cell motility	0.28657	ENSG00000151491	EPS8
GO:0070425	0.0723235	19.7786	0.0741363	1	3	negative regulation of nucleotide-binding oligomerization domain containing signaling pathway	0.28657	ENSG00000112851	ERBB2IP
GO:0070433	0.0723235	19.7786	0.0741363	1	3	negative regulation of nucleotide-binding oligomerization domain containing 2 signaling pathway	0.28657	ENSG00000112851	ERBB2IP
GO:0071725	0.0723235	19.7786	0.0741363	1	3	response to triacyl bacterial lipopeptide	0.28657	ENSG00000170458	CD14
GO:0071727	0.0723235	19.7786	0.0741363	1	3	cellular response to triacyl bacterial lipopeptide	0.28657	ENSG00000170458	CD14
GO:0072092	0.0723235	19.7786	0.0741363	1	3	ureteric bud invasion	0.28657	ENSG00000248905	FMN1
GO:0075509	0.0723235	19.7786	0.0741363	1	3	endocytosis involved in viral entry into host cell	0.28657	ENSG00000085832	EPS15
GO:0090292	0.0723235	19.7786	0.0741363	1	3	nuclear matrix anchoring at nuclear membrane	0.28657	ENSG00000100242	SUN2
GO:0090649	0.0723235	19.7786	0.0741363	1	3	response to oxygen-glucose deprivation	0.28657	ENSG00000165699	TSC1
GO:0090650	0.0723235	19.7786	0.0741363	1	3	cellular response to oxygen-glucose deprivation	0.28657	ENSG00000165699	TSC1
GO:0097051	0.0723235	19.7786	0.0741363	1	3	establishment of protein localization to endoplasmic reticulum membrane	0.28657	ENSG00000115839	RAB3GAP1
GO:0097343	0.0723235	19.7786	0.0741363	1	3	ripoptosome assembly	0.28657	ENSG00000110330	BIRC2
GO:1900063	0.0723235	19.7786	0.0741363	1	3	regulation of peroxisome organization	0.28657	ENSG00000088888	MAVS
GO:1900239	0.0723235	19.7786	0.0741363	1	3	regulation of phenotypic switching	0.28657	ENSG00000185591	SP1
GO:1901026	0.0723235	19.7786	0.0741363	1	3	ripoptosome assembly involved in necroptotic process	0.28657	ENSG00000110330	BIRC2
GO:1902339	0.0723235	19.7786	0.0741363	1	3	positive regulation of apoptotic process involved in morphogenesis	0.28657	ENSG00000111424	VDR
GO:1902525	0.0723235	19.7786	0.0741363	1	3	regulation of protein monoubiquitination	0.28657	ENSG00000110330	BIRC2
GO:1902617	0.0723235	19.7786	0.0741363	1	3	response to fluoride	0.28657	ENSG00000150907	FOXO1
GO:1902731	0.0723235	19.7786	0.0741363	1	3	negative regulation of chondrocyte proliferation	0.28657	ENSG00000138696	BMPR1B
GO:1902896	0.0723235	19.7786	0.0741363	1	3	terminal web assembly	0.28657	ENSG00000120756	PLS1
GO:1903297	0.0723235	19.7786	0.0741363	1	3	regulation of hypoxia-induced intrinsic apoptotic signaling pathway	0.28657	ENSG00000149428	HYOU1
GO:1903298	0.0723235	19.7786	0.0741363	1	3	negative regulation of hypoxia-induced intrinsic apoptotic signaling pathway	0.28657	ENSG00000149428	HYOU1
GO:1903371	0.0723235	19.7786	0.0741363	1	3	regulation of endoplasmic reticulum tubular network organization	0.28657	ENSG00000115839	RAB3GAP1
GO:1903519	0.0723235	19.7786	0.0741363	1	3	regulation of mammary gland involution	0.28657	ENSG00000111424	VDR
GO:1903521	0.0723235	19.7786	0.0741363	1	3	positive regulation of mammary gland involution	0.28657	ENSG00000111424	VDR
GO:1903593	0.0723235	19.7786	0.0741363	1	3	regulation of histamine secretion by mast cell	0.28657	ENSG00000124333	VAMP7
GO:1903595	0.0723235	19.7786	0.0741363	1	3	positive regulation of histamine secretion by mast cell	0.28657	ENSG00000124333	VAMP7
GO:1903677	0.0723235	19.7786	0.0741363	1	3	regulation of cap-independent translational initiation	0.28657	ENSG00000158092	NCK1
GO:1903679	0.0723235	19.7786	0.0741363	1	3	positive regulation of cap-independent translational initiation	0.28657	ENSG00000158092	NCK1
GO:1903802	0.0723235	19.7786	0.0741363	1	3	L-glutamate(1-) import into cell	0.28657	ENSG00000132326	PER2
GO:1904378	0.0723235	19.7786	0.0741363	1	3	maintenance of unfolded protein involved in ERAD pathway	0.28657	ENSG00000204463	BAG6
GO:1904688	0.0723235	19.7786	0.0741363	1	3	regulation of cytoplasmic translational initiation	0.28657	ENSG00000158092	NCK1
GO:1904690	0.0723235	19.7786	0.0741363	1	3	positive regulation of cytoplasmic translational initiation	0.28657	ENSG00000158092	NCK1
GO:1904694	0.0723235	19.7786	0.0741363	1	3	negative regulation of vascular smooth muscle contraction	0.28657	ENSG00000165895	ARHGAP42
GO:1904747	0.0723235	19.7786	0.0741363	1	3	positive regulation of apoptotic process involved in development	0.28657	ENSG00000111424	VDR
GO:1905097	0.0723235	19.7786	0.0741363	1	3	regulation of guanyl-nucleotide exchange factor activity	0.28657	ENSG00000260916	CCPG1
GO:1990737	0.0723235	19.7786	0.0741363	1	3	response to manganese-induced endoplasmic reticulum stress	0.28657	ENSG00000172071	EIF2AK3
GO:2000389	0.0723235	19.7786	0.0741363	1	3	regulation of neutrophil extravasation	0.28657	ENSG00000115594	IL1R1
GO:2000391	0.0723235	19.7786	0.0741363	1	3	positive regulation of neutrophil extravasation	0.28657	ENSG00000115594	IL1R1
GO:2001274	0.0723235	19.7786	0.0741363	1	3	negative regulation of glucose import in response to insulin stimulus	0.28657	ENSG00000132356	PRKAA1
GO:0006952	0.0725254	1.28539	36.1044	45	1461	defense response	0.287123	ENSG00000048052,ENSG00000064201,ENSG00000072062,ENSG00000080561,ENSG00000082196,ENSG00000088888,ENSG00000100280,ENSG00000102580,ENSG00000102699,ENSG00000107798,ENSG00000110330,ENSG00000111199,ENSG00000112851,ENSG00000113916,ENSG00000115594,ENSG00000117983,ENSG00000119396,ENSG00000119535,ENSG00000121236,ENSG00000124333,ENSG00000128284,ENSG00000129657,ENSG00000130164,ENSG00000138032,ENSG00000138696…	HDAC9,TSPAN32,PRKACA,MID2,C1QTNF3,MAVS,AP1B1,DNAJC3,PARP4,LIPA,BIRC2,TRPV4,ERBB2IP,BCL6,IL1R1,MUC5B,RAB14,CSF3R,TRIM6,VAMP7,APOL3,SEC14L1,LDLR,PPM1B,BMPR1B,PRKACB,FER,TAB3,ABR,ITGB2,ALOX15,JAK1,AP1G1,IRF2,MECP2,CD14,PRKCE,PACS1,RPS6KA3,BCR,PPARA,DAPK1,MAP3K5,TGM2,LGR4
GO:0051962	0.0734239	1.53129	10.725	16	434	positive regulation of nervous system development	0.290432	ENSG00000008086,ENSG00000106078,ENSG00000107263,ENSG00000113916,ENSG00000124333,ENSG00000127603,ENSG00000130779,ENSG00000133961,ENSG00000134313,ENSG00000145868,ENSG00000158092,ENSG00000169057,ENSG00000173376,ENSG00000184454,ENSG00000198399,ENSG00000274286	CDKL5,COBL,RAPGEF1,BCL6,VAMP7,MACF1,CLIP1,NUMB,KIDINS220,FBXO38,NCK1,MECP2,NDNF,NCMAP,ITSN2,ADRA2B
GO:0008589	0.0735035	2.64706	1.58157	4	64	regulation of smoothened signaling pathway	0.290499	ENSG00000072062,ENSG00000138002,ENSG00000142875,ENSG00000154309	PRKACA,IFT172,PRKACB,DISP1
GO:0010469	0.0748499	2.11173	2.94074	6	119	regulation of receptor activity	0.295136	ENSG00000072062,ENSG00000124151,ENSG00000141503,ENSG00000171132,ENSG00000196730,ENSG00000274286	PRKACA,NCOA3,MINK1,PRKCE,DAPK1,ADRA2B
GO:0032507	0.0748681	2.31044	2.2488	5	91	maintenance of protein location in cell	0.295136	ENSG00000006747,ENSG00000100242,ENSG00000118454,ENSG00000140463,ENSG00000159256	SCIN,SUN2,ANKRD13C,BBS4,MORC3
GO:0042177	0.0748681	2.31044	2.2488	5	91	negative regulation of protein catabolic process	0.295136	ENSG00000068912,ENSG00000107185,ENSG00000155313,ENSG00000171100,ENSG00000204463	ERLEC1,RGP1,USP25,MTM1,BAG6
GO:0051402	0.0755662	1.7933	5.16483	9	209	neuron apoptotic process	0.296944	ENSG00000107731,ENSG00000120868,ENSG00000121879,ENSG00000135472,ENSG00000136854,ENSG00000145715,ENSG00000149428,ENSG00000169057,ENSG00000173376	UNC5B,APAF1,PIK3CA,FAIM2,STXBP1,RASA1,HYOU1,MECP2,NDNF
GO:0031122	0.0756476	3.21608	0.988484	3	40	cytoplasmic microtubule organization	0.296944	ENSG00000075711,ENSG00000111199,ENSG00000138002	DLG1,TRPV4,IFT172
GO:0032480	0.0756476	3.21608	0.988484	3	40	negative regulation of type I interferon production	0.296944	ENSG00000088888,ENSG00000106052,ENSG00000138032	MAVS,TAX1BP1,PPM1B
GO:0042992	0.0756476	3.21608	0.988484	3	40	negative regulation of transcription factor import into nucleus	0.296944	ENSG00000082196,ENSG00000127334,ENSG00000138032	C1QTNF3,DYRK2,PPM1B
GO:0045912	0.0756476	3.21608	0.988484	3	40	negative regulation of carbohydrate metabolic process	0.296944	ENSG00000082196,ENSG00000116678,ENSG00000186951	C1QTNF3,LEPR,PPARA
GO:0048199	0.0768723	2.6035	1.60629	4	65	vesicle targeting, to, from or within Golgi	0.301496	ENSG00000073969,ENSG00000107862,ENSG00000113615,ENSG00000170348	NSF,GBF1,SEC24A,TMED10
GO:0051017	0.0772395	2.09308	2.96545	6	120	actin filament bundle assembly	0.302679	ENSG00000120756,ENSG00000137486,ENSG00000140463,ENSG00000151491,ENSG00000158195,ENSG00000165699	PLS1,ARRB1,BBS4,EPS8,WASF2,TSC1
GO:0051050	0.0776357	1.35588	21.969	29	889	positive regulation of transport	0.303781	ENSG00000006747,ENSG00000072062,ENSG00000075711,ENSG00000082196,ENSG00000088888,ENSG00000106299,ENSG00000111199,ENSG00000113615,ENSG00000115839,ENSG00000116574,ENSG00000117461,ENSG00000119541,ENSG00000121236,ENSG00000124333,ENSG00000136854,ENSG00000137486,ENSG00000141736,ENSG00000143457,ENSG00000153721,ENSG00000159842,ENSG00000160695,ENSG00000166747,ENSG00000168710,ENSG00000170458,ENSG00000171132…	SCIN,PRKACA,DLG1,C1QTNF3,MAVS,WASL,TRPV4,SEC24A,RAB3GAP1,RHOU,PIK3R3,VPS4B,TRIM6,VAMP7,STXBP1,ARRB1,ERBB2,GOLPH3L,CNKSR3,ABR,VPS11,AP1G1,AHCYL1,CD14,PRKCE,HCAR2,BCR,UNC13B,SREBF2
GO:0019886	0.0776518	2.28374	2.27351	5	92	antigen processing and presentation of exogenous peptide antigen via MHC class II	0.303781	ENSG00000077380,ENSG00000100280,ENSG00000113615,ENSG00000166747,ENSG00000173898	DYNC1I2,AP1B1,SEC24A,AP1G1,SPTBN2
GO:0051129	0.0780495	1.44644	14.1847	20	574	negative regulation of cellular component organization	0.305029	ENSG00000006747,ENSG00000071242,ENSG00000075223,ENSG00000089163,ENSG00000092330,ENSG00000106299,ENSG00000108946,ENSG00000110330,ENSG00000111199,ENSG00000133961,ENSG00000136158,ENSG00000138594,ENSG00000140463,ENSG00000151491,ENSG00000158195,ENSG00000169057,ENSG00000171100,ENSG00000172943,ENSG00000173898,ENSG00000175745	SCIN,RPS6KA2,SEMA3C,SIRT4,TINF2,WASL,PRKAR1A,BIRC2,TRPV4,NUMB,SPRY2,TMOD3,BBS4,EPS8,WASF2,MECP2,MTM1,PHF8,SPTBN2,NR2F1
GO:0070925	0.0785677	1.43149	15.0497	21	609	organelle assembly	0.305029	ENSG00000100271,ENSG00000100330,ENSG00000107816,ENSG00000108239,ENSG00000108946,ENSG00000115145,ENSG00000115561,ENSG00000115839,ENSG00000119396,ENSG00000119541,ENSG00000120756,ENSG00000125124,ENSG00000138002,ENSG00000138594,ENSG00000140463,ENSG00000144791,ENSG00000150867,ENSG00000160695,ENSG00000170776,ENSG00000171100,ENSG00000184640	TTLL1,MTMR3,LZTS2,TBC1D12,PRKAR1A,STAM2,CHMP3,RAB3GAP1,RAB14,VPS4B,PLS1,BBS2,IFT172,TMOD3,BBS4,LIMD1,PIP4K2A,VPS11,AKAP13,MTM1,SEPT9
GO:0097193	0.078787	1.66852	6.77111	11	274	intrinsic apoptotic signaling pathway	0.305029	ENSG00000005882,ENSG00000052795,ENSG00000077232,ENSG00000120868,ENSG00000127334,ENSG00000149428,ENSG00000158092,ENSG00000172071,ENSG00000172667,ENSG00000197442,ENSG00000204463	PDK2,FNIP2,DNAJC10,APAF1,DYRK2,HYOU1,NCK1,EIF2AK3,ZMAT3,MAP3K5,BAG6
GO:0042594	0.0789539	1.94801	3.70681	7	150	response to starvation	0.305029	ENSG00000004799,ENSG00000100330,ENSG00000132356,ENSG00000133056,ENSG00000150907,ENSG00000172071,ENSG00000198911	PDK4,MTMR3,PRKAA1,PIK3C2B,FOXO1,EIF2AK3,SREBF2
GO:0043901	0.0789539	1.94801	3.70681	7	150	negative regulation of multi-organism process	0.305029	ENSG00000080561,ENSG00000088888,ENSG00000111348,ENSG00000115561,ENSG00000121236,ENSG00000129657,ENSG00000138032	MID2,MAVS,ARHGDIB,CHMP3,TRIM6,SEC14L1,PPM1B
GO:0002230	0.0790255	4.66083	0.46953	2	19	positive regulation of defense response to virus by host	0.305029	ENSG00000088888,ENSG00000121236	MAVS,TRIM6
GO:0006206	0.0790255	4.66083	0.46953	2	19	pyrimidine nucleobase metabolic process	0.305029	ENSG00000162368,ENSG00000188641	CMPK1,DPYD
GO:0009651	0.0790255	4.66083	0.46953	2	19	response to salt stress	0.305029	ENSG00000111199,ENSG00000140199	TRPV4,SLC12A6
GO:0014829	0.0790255	4.66083	0.46953	2	19	vascular smooth muscle contraction	0.305029	ENSG00000125124,ENSG00000165895	BBS2,ARHGAP42
GO:0034104	0.0790255	4.66083	0.46953	2	19	negative regulation of tissue remodeling	0.305029	ENSG00000159842,ENSG00000186716	ABR,BCR
GO:0043302	0.0790255	4.66083	0.46953	2	19	positive regulation of leukocyte degranulation	0.305029	ENSG00000124333,ENSG00000166747	VAMP7,AP1G1
GO:0045956	0.0790255	4.66083	0.46953	2	19	positive regulation of calcium ion-dependent exocytosis	0.305029	ENSG00000136854,ENSG00000198722	STXBP1,UNC13B
GO:0046037	0.0790255	4.66083	0.46953	2	19	GMP metabolic process	0.305029	ENSG00000075711,ENSG00000119139	DLG1,TJP2
GO:0060632	0.0790255	4.66083	0.46953	2	19	regulation of microtubule-based movement	0.305029	ENSG00000125124,ENSG00000140463	BBS2,BBS4
GO:0070584	0.0790255	4.66083	0.46953	2	19	mitochondrion morphogenesis	0.305029	ENSG00000113163,ENSG00000171100	COL4A3BP,MTM1
GO:1903649	0.0790255	4.66083	0.46953	2	19	regulation of cytoplasmic transport	0.305029	ENSG00000115561,ENSG00000160695	CHMP3,VPS11
GO:0007162	0.0791104	1.77532	5.21425	9	211	negative regulation of cell adhesion	0.305102	ENSG00000075711,ENSG00000108946,ENSG00000111199,ENSG00000111348,ENSG00000111846,ENSG00000113916,ENSG00000141736,ENSG00000145715,ENSG00000186951	DLG1,PRKAR1A,TRPV4,ARHGDIB,GCNT2,BCL6,ERBB2,RASA1,PPARA
GO:0061564	0.079366	1.51272	10.8486	16	439	axon development	0.305833	ENSG00000006468,ENSG00000008086,ENSG00000075223,ENSG00000104133,ENSG00000106078,ENSG00000107731,ENSG00000127603,ENSG00000133961,ENSG00000136854,ENSG00000138696,ENSG00000141298,ENSG00000141736,ENSG00000173482,ENSG00000173898,ENSG00000198513,ENSG00000273749	ETV1,CDKL5,SEMA3C,SPG11,COBL,UNC5B,MACF1,NUMB,STXBP1,BMPR1B,SSH2,ERBB2,PTPRM,SPTBN2,ATL1,CYFIP1
[truncated: 3,427 more rows]

## Sheet: C2
GOBPID	Pvalue	OddsRatio	ExpCount	Count	Size	Term	adjustedPvalue	ensembl_gene_id	hgnc_symbol
[truncated: 5,495 more rows]

## Sheet: C4
GOBPID	Pvalue	OddsRatio	ExpCount	Count	Size	Term	adjustedPvalue	ensembl_gene_id	hgnc_symbol
[truncated: 4,796 more rows]

## Sheet: C8
GOBPID	Pvalue	OddsRatio	ExpCount	Count	Size	Term	adjustedPvalue	ensembl_gene_id	hgnc_symbol
[truncated: 4,460 more rows]
