# Supplementary material for: Widespread Repression of Gene Expression in Cancer by a Wnt/β-Catenin/MAPK Pathway
Source: Oxford University Press journal article supplement (doi:10.1158/0008-5472.can-20-2129), 2020-11-17
Supplement: 00085472can202129-sup-245850_3_supp_6707323_qjhcsx.xlsx [file 00085472can202129-sup-245850_3_supp_6707323_qjhcsx.xlsx]

## Sheet: README
		Supplemental Table S2
		Results of TFBS enrichment analysis using AME for four of the Wnt-repressed clusters that were consistently upregulated following treatment with ETC-159 (see Figure 2)

## Sheet: Cluster6
id	name	p-value	adj_p.value	evalue	padj
MA1118.1	SIX1	0.000117	0.16	92.8	0.067743
MA0528.1	ZNF263	0.000297	0.597	346	0.0859815
MA0069.1	Pax6	0.000558	0.19	110	0.08685
MA1113.1	PBX2	0.000691	0.644	373	0.08685
MA0740.1	KLF14	0.000959	0.825	478	0.08685
MA0498.2	MEIS1	0.000961	0.971	562	0.08685
MA0089.1	MAFG::NFE2L1	0.00105	0.979	567	0.08685
MA0691.1	TFAP4	0.00128	0.611	354	0.09264
MA0616.1	Hes2	0.00163	0.986	571	0.104863
MA0905.1	HOXC10	0.0024	0.989	573	0.13896
MA0659.1	MAFG	0.00383	0.19	110	0.151367
MA0496.2	MAFK	0.00383	0.281	163	0.151367
MA0657.1	KLF13	0.00472	0.359	208	0.151367
MA0154.3	EBF1	0.00459	0.803	465	0.151367
MA0164.1	Nr2e3	0.00314	0.938	543	0.151367
MA1119.1	SIX2	0.00526	0.976	565	0.151367
MA0503.1	Nkx2-5(var.2)	0.00384	0.998	578	0.151367
MA0078.1	Sox17	0.00544	1	579	0.151367
MA0031.1	FOXD1	0.00543	1	579	0.151367
MA0671.1	NFIX	0.00544	1	579	0.151367
MA0056.1	MZF1	0.00549	1	579	0.151367
MA0784.1	POU1F1	0.00606	0.997	577	0.159488
MA0787.1	POU3F2	0.00673	1	579	0.168634
MA0606.1	NFAT5	0.00699	1	579	0.168634
MA0081.1	SPIB	0.00731	1	579	0.1693
MA0848.1	FOXO4	0.00769	1	579	0.17125
MA1149.1	RARA::RXRG	0.00974	0.98	567	0.184122
MA0838.1	CEBPG	0.0132	0.984	570	0.184122
MA0150.2	Nfe2l2	0.0145	0.992	574	0.184122
MA1101.1	BACH2	0.0117	0.999	579	0.184122
MA0771.1	HSF4	0.0149	1	579	0.184122
MA0629.1	Rhox11	0.013	1	579	0.184122
MA1114.1	PBX3	0.0139	1	579	0.184122
MA0685.1	SP4	0.0148	1	579	0.184122
MA0884.1	DUXA	0.0159	1	579	0.184122
MA0511.2	RUNX2	0.014	1	579	0.184122
MA0872.1	TFAP2A(var.3)	0.0149	1	579	0.184122
MA0871.1	TFEC	0.0139	1	579	0.184122
MA0042.2	FOXI1	0.0115	1	579	0.184122
MA0002.2	RUNX1	0.0102	1	579	0.184122
MA0774.1	MEIS2	0.0136	1	579	0.184122
MA0786.1	POU3F1	0.0145	1	579	0.184122
MA0753.1	ZNF740	0.0156	1	579	0.184122
MA0824.1	ID4	0.0146	1	579	0.184122
MA1143.1	FOSL1::JUND(var.2)	0.0144	1	579	0.184122
MA0136.2	ELF5	0.0119	1	579	0.184122
MA0635.1	BARHL2	0.0157	1	579	0.184122
MA0597.1	THAP1	0.0159	1	579	0.184122
MA0067.1	Pax2	0.0101	1	579	0.184122
MA0057.1	MZF1(var.2)	0.012	1	579	0.184122
MA0156.2	FEV	0.0165	1	579	0.187324
MA0631.1	Six3	0.0178	0.945	547	0.187385
MA0768.1	LEF1	0.0171	0.992	575	0.187385
MA0815.1	TFAP2C(var.3)	0.0172	1	579	0.187385
MA0850.1	FOXP3	0.0178	1	579	0.187385
MA0764.1	ETV4	0.0184	1	579	0.190243
MA0119.1	NFIC::TLX1	0.022	0.859	497	0.193508
MA0527.1	ZBTB33	0.025	1	579	0.193508
MA0613.1	FOXG1	0.0201	1	579	0.193508
MA0143.3	Sox2	0.025	1	579	0.193508
MA0157.2	FOXO3	0.0213	1	579	0.193508
MA0692.1	TFEB	0.0234	1	579	0.193508
MA0693.2	VDR	0.0209	1	579	0.193508
MA0036.3	GATA2	0.023	1	579	0.193508
MA0895.1	HMBOX1	0.0254	1	579	0.193508
MA0879.1	Dlx1	0.0243	1	579	0.193508
MA0849.1	FOXO6	0.0234	1	579	0.193508
MA0765.1	ETV5	0.0254	1	579	0.193508
MA0761.1	ETV1	0.023	1	579	0.193508
MA0098.3	ETS1	0.023	1	579	0.193508
MA0759.1	ELK3	0.023	1	579	0.193508
MA0747.1	SP8	0.0197	1	579	0.193508
MA0687.1	SPIC	0.0244	1	579	0.193508
MA0673.1	NKX2-8	0.0248	1	579	0.193508
MA0502.1	NFYB	0.025	1	579	0.193508
MA0519.1	Stat5a::Stat5b	0.0239	1	579	0.193508
MA0070.1	PBX1	0.028	1	579	0.205152
MA0904.1	Hoxb5	0.0287	1	579	0.205152
MA0651.1	HOXC11	0.0285	1	579	0.205152
MA0878.1	CDX1	0.0281	1	579	0.205152
MA0158.1	HOXA5	0.0282	1	579	0.205152
MA0842.1	NRL	0.03	1	579	0.207475
MA0793.1	POU6F2	0.03	1	579	0.207475
MA0602.1	Arid5a	0.0301	1	579	0.207475
MA0775.1	MEIS3	0.0311	1	579	0.211846
MA0731.1	BCL6B	0.0433	0.0433	25	0.213417
MA0729.1	RARA	0.0433	0.0433	25	0.213417
MA0795.1	SMAD3	0.0433	1	579	0.213417
MA0680.1	PAX7	0.0444	1	579	0.213417
MA0757.1	ONECUT3	0.044	1	579	0.213417
MA0734.1	GLI2	0.0432	1	579	0.213417
MA0633.1	Twist2	0.0407	1	579	0.213417
MA0142.1	Pou5f1::Sox2	0.044	1	579	0.213417
MA1133.1	JUN::JUNB(var.2)	0.044	1	579	0.213417
MA0037.3	GATA3	0.0349	1	579	0.213417
MA0911.1	Hoxa11	0.034	1	579	0.213417
MA0908.1	HOXD11	0.0356	1	579	0.213417
MA0888.1	EVX2	0.0336	1	579	0.213417
MA0882.1	DLX6	0.0334	1	579	0.213417
MA0880.1	Dlx3	0.0444	1	579	0.213417
MA0847.1	FOXD2	0.0319	1	579	0.213417
MA0466.2	CEBPB	0.0432	1	579	0.213417
MA0813.1	TFAP2B(var.3)	0.0424	1	579	0.213417
MA0800.1	EOMES	0.0439	1	579	0.213417
MA0788.1	POU3F3	0.0406	1	579	0.213417
MA0762.1	ETV2	0.0356	1	579	0.213417
MA0741.1	KLF16	0.0408	1	579	0.213417
MA0017.2	NR2F1	0.0405	1	579	0.213417
MA0710.1	NOTO	0.0377	1	579	0.213417
MA0689.1	TBX20	0.0433	1	579	0.213417
MA0684.1	RUNX3	0.0339	1	579	0.213417
MA0670.1	NFIA	0.0433	1	579	0.213417
MA0650.1	HOXA13	0.036	1	579	0.213417
MA0033.2	FOXL1	0.0446	1	579	0.213417
MA0632.1	Tcfl5	0.043	1	579	0.213417
MA0625.1	NFATC3	0.0354	1	579	0.213417
MA0624.1	NFATC1	0.0433	1	579	0.213417
MA0523.1	TCF7L2	0.044	1	579	0.213417
MA0467.1	Crx	0.0433	1	579	0.213417
MA0152.1	NFATC2	0.0349	1	579	0.213417
MA0077.1	SOX9	0.0339	1	579	0.213417
MA0486.2	HSF1	0.0487	0.999	578	0.215247
MA0873.1	HOXD12	0.0485	1	579	0.215247
MA0769.1	Tcf7	0.0486	1	579	0.215247
MA0014.3	PAX5	0.0474	1	579	0.215247
MA0481.2	FOXP1	0.0477	1	579	0.215247
MA0766.1	GATA5	0.0474	1	579	0.215247
MA0745.1	SNAI2	0.0454	1	579	0.215247
MA0048.2	NHLH1	0.0487	1	579	0.215247
MA0618.1	LBX1	0.0466	1	579	0.215247
MA0065.2	Pparg::Rxra	0.0478	1	579	0.215247
MA0656.1	JDP2(var.2)	0.0504	1	579	0.221073
MA0029.1	Mecom	0.051	1	579	0.222023
MA0909.1	HOXD13	0.0515	1	579	0.222234
MA0614.1	Foxj2	0.0522	1	579	0.222234
MA0151.1	Arid3a	0.0521	1	579	0.222234
MA0139.1	CTCF	0.0531	1	579	0.223269
MA1104.1	GATA6	0.0535	1	579	0.223269
MA1102.1	CTCFL	0.0536	1	579	0.223269
MA0675.1	NKX6-2	0.054	1	579	0.223329
MA0837.1	CEBPE	0.055	1	579	0.225851
MA0645.1	ETV6	0.0571	1	579	0.231195
MA0095.2	YY1	0.0569	1	579	0.231195
MA0810.1	TFAP2A(var.2)	0.0579	1	579	0.2316
MA0807.1	TBX5	0.058	1	579	0.2316
MA0836.1	CEBPD	0.06	1	579	0.237945
MA1103.1	FOXK2	0.0625	1	579	0.246173
MA0756.1	ONECUT2	0.0668	1	579	0.249443
MA1120.1	SOX13	0.0668	1	579	0.249443
MA0887.1	EVX1	0.0678	1	579	0.249443
MA0742.1	Klf12	0.0684	1	579	0.249443
MA0472.2	EGR2	0.0685	1	579	0.249443
MA0132.2	PDX1	0.0685	1	579	0.249443
MA0075.2	Prrx2	0.0684	1	579	0.249443
MA0665.1	MSC	0.0666	1	579	0.249443
MA0627.1	Pou2f3	0.0655	1	579	0.249443
MA0079.3	SP1	0.0659	1	579	0.249443
MA0520.1	Stat6	0.0642	1	579	0.249443
MA0465.1	CDX2	0.0685	1	579	0.249443
MA0746.1	SP3	0.0696	1	579	0.251865
MA0785.1	POU2F1	0.0706	1	579	0.253759
MA0748.1	YY2	0.071	1	579	0.253759
MA0601.1	Arid3b	0.0715	1	579	0.253979
MA0858.1	Rarb(var.2)	0.0847	0.298	173	0.254879
MA0730.1	RARA(var.2)	0.0847	0.778	450	0.254879
MA0495.2	MAFF	0.0847	0.999	579	0.254879
MA0839.1	CREB3L1	0.0821	1	579	0.254879
MA0780.1	PAX3	0.0847	1	579	0.254879
MA1421.1	TCF7L1	0.0747	1	579	0.254879
MA1153.1	Smad4	0.0847	1	579	0.254879
MA0831.2	TFE3	0.0742	1	579	0.254879
MA1142.1	FOSL1::JUND	0.0767	1	579	0.254879
MA0526.2	USF2	0.0851	1	579	0.254879
MA0442.2	SOX10	0.0793	1	579	0.254879
MA0161.2	NFIC	0.0817	1	579	0.254879
MA0912.1	Hoxd3	0.078	1	579	0.254879
MA0910.1	Hoxd8	0.0828	1	579	0.254879
MA0901.1	HOXB13	0.0772	1	579	0.254879
MA0885.1	Dlx2	0.081	1	579	0.254879
MA0881.1	Dlx4	0.0854	1	579	0.254879
MA0028.2	ELK1	0.0831	1	579	0.254879
MA0524.2	TFAP2C	0.0775	1	579	0.254879
MA0760.1	ERF	0.0803	1	579	0.254879
MA0754.1	CUX1	0.0733	1	579	0.254879
MA0738.1	HIC2	0.0847	1	579	0.254879
MA0725.1	VSX1	0.0743	1	579	0.254879
MA0712.1	OTX2	0.0831	1	579	0.254879
MA0688.1	TBX2	0.0793	1	579	0.254879
MA0668.1	NEUROD2	0.0765	1	579	0.254879
MA0475.2	FLI1	0.0847	1	579	0.254879
MA0608.1	Creb3l2	0.0817	1	579	0.254879
MA0595.1	SREBF1	0.0731	1	579	0.254879
MA0140.2	GATA1::TAL1	0.0847	1	579	0.254879
MA0462.1	BATF::JUN	0.0784	1	579	0.254879
MA0706.1	MEOX2	0.0862	1	579	0.255948
MA0611.1	Dux	0.0869	1	579	0.25671
MA0674.1	NKX6-1	0.0876	1	579	0.257464
MA0109.1	HLTF	0.0884	1	579	0.258503
MA0723.1	VAX2	0.0896	1	579	0.260695
MA0679.1	ONECUT1	0.0926	1	579	0.262821
MA1146.1	NR1A4::RXRA	0.0926	1	579	0.262821
MA1139.1	FOSL2::JUNB(var.2)	0.0926	1	579	0.262821
MA0739.1	Hic1	0.0916	1	579	0.262821
MA0040.1	Foxq1	0.092	1	579	0.262821
MA1137.1	FOSL1::JUNB	0.0954	1	579	0.26429
MA0620.2	MITF	0.0945	1	579	0.26429
MA0003.3	TFAP2A	0.0952	1	579	0.26429
MA0084.1	SRY	0.0946	1	579	0.26429
MA0063.1	Nkx2-5	0.0948	1	579	0.26429
MA0159.1	RARA::RXRA	0.0966	1	579	0.265078
MA1127.1	FOSB::JUN	0.0966	1	579	0.265078
MA0772.1	IRF7	0.0987	1	579	0.269563
MA1123.1	TWIST1	0.0993	1	579	0.269928
MA1418.1	IRF3	0.0998	1	579	0.27002
MA0845.1	FOXB1	0.102	1	579	0.272157
MA0617.1	Id2	0.102	1	579	0.272157
MA0479.1	FOXH1	0.102	1	579	0.272157
MA1131.1	FOSL2::JUN(var.2)	0.103	1	579	0.273564
MA0612.1	EMX1	0.104	1	579	0.274959
MA0776.1	MYBL1	0.106	1	579	0.27771
MA0137.3	STAT1	0.106	1	579	0.27771
MA0501.1	MAF::NFE2	0.107	1	579	0.277816
MA0667.1	MYF6	0.107	1	579	0.277816
MA0596.1	SREBF2	0.108	1	579	0.279161
MA0103.3	ZEB1	0.109	1	579	0.279252
MA0811.1	TFAP2B	0.109	1	579	0.279252
MA1115.1	POU5F1	0.11	1	579	0.280573
MA0483.1	Gfi1b	0.111	1	579	0.281882
MA0900.1	HOXA2	0.112	1	579	0.283179
MA0694.1	ZBTB7B	0.114	1	579	0.286983
MA0112.3	ESR1	0.124	0.605	350	0.2895
MA0080.4	SPI1	0.117	1	579	0.2895
MA0770.1	HSF2	0.12	1	579	0.2895
MA0073.1	RREB1	0.124	1	579	0.2895
MA1110.1	NR1H4	0.124	1	579	0.2895
MA0060.3	NFYA	0.124	1	579	0.2895
MA0018.3	CREB1	0.121	1	579	0.2895
MA0474.2	ERG	0.124	1	579	0.2895
MA0707.1	MNX1	0.116	1	579	0.2895
MA0695.1	ZBTB7C	0.118	1	579	0.2895
MA0153.2	HNF1B	0.124	1	579	0.2895
MA0647.1	GRHL1	0.121	1	579	0.2895
MA0640.1	ELF3	0.124	1	579	0.2895
MA0598.2	EHF	0.124	1	579	0.2895
MA0615.1	Gmeb1	0.123	1	579	0.2895
MA0604.1	Atf1	0.124	1	579	0.2895
MA0517.1	STAT1::STAT2	0.124	1	579	0.2895
MA0518.1	Stat4	0.119	1	579	0.2895
MA0755.1	CUX2	0.126	1	579	0.292988
MA0006.1	Ahr::Arnt	0.127	1	579	0.294132
MA0677.1	Nr2f6	0.13	1	579	0.295089
MA0892.1	GSX1	0.132	1	579	0.295089
MA0890.1	GBX2	0.129	1	579	0.295089
MA0820.1	FIGLA	0.131	1	579	0.295089
MA0682.1	Pitx1	0.131	1	579	0.295089
MA0628.1	POU6F1	0.132	1	579	0.295089
MA0609.1	Crem	0.132	1	579	0.295089
MA0482.1	Gata4	0.132	1	579	0.295089
MA0514.1	Sox3	0.13	1	579	0.295089
MA0715.1	PROP1	0.134	1	579	0.298408
MA1147.1	NR4A2::RXRA	0.135	1	579	0.299483
MA1154.1	ZNF282	0.137	1	579	0.30276
MA0117.2	Mafb	0.139	1	579	0.304852
MA0638.1	CREB3	0.139	1	579	0.304852
MA0899.1	HOXA10	0.141	1	579	0.306914
MA0599.1	KLF5	0.141	1	579	0.306914
MA1109.1	NEUROD1	0.142	1	579	0.307933
MA0907.1	HOXC13	0.144	1	579	0.3088
MA0763.1	ETV3	0.143	1	579	0.3088
MA0507.1	POU2F2	0.144	1	579	0.3088
MA0035.3	Gata1	0.145	1	579	0.309797
MA1132.1	JUN::JUNB	0.151	1	579	0.311135
MA0750.2	ZBTB7A	0.149	1	579	0.311135
MA1112.1	NR4A1	0.148	1	579	0.311135
MA0840.1	Creb5	0.15	1	579	0.311135
MA0830.1	TCF4	0.149	1	579	0.311135
MA0700.1	LHX2	0.151	1	579	0.311135
MA0676.1	Nr2e1	0.151	1	579	0.311135
MA0669.1	NEUROG2	0.151	1	579	0.311135
MA0593.1	FOXP2	0.147	1	579	0.311135
MA0102.3	CEBPA	0.149	1	579	0.311135
MA0522.2	TCF3	0.152	1	579	0.312085
MA0494.1	Nr1h3::Rxra	0.153	1	579	0.313028
MA0906.1	HOXC12	0.156	1	579	0.318042
MA0141.3	ESRRB	0.159	1	579	0.32077
MA0619.1	LIN54	0.159	1	579	0.32077
MA0485.1	Hoxc9	0.158	1	579	0.32077
MA0149.1	EWSR1-FLI1	0.162	1	579	0.321452
MA1126.1	FOS::JUN(var.2)	0.166	1	579	0.321452
MA1121.1	TEAD2	0.166	1	579	0.321452
MA0854.1	Alx1	0.164	1	579	0.321452
MA0806.1	TBX4	0.164	1	579	0.321452
MA0702.1	LMX1A	0.163	1	579	0.321452
MA0090.2	TEAD1	0.162	1	579	0.321452
MA0630.1	SHOX	0.166	1	579	0.321452
MA0610.1	DMRT3	0.162	1	579	0.321452
MA0480.1	Foxo1	0.166	1	579	0.321452
MA0488.1	JUN	0.162	1	579	0.321452
MA0504.1	NR2C2	0.166	1	579	0.321452
MA0722.1	VAX1	0.167	1	579	0.32231
MA0886.1	EMX2	0.169	1	579	0.32401
MA0130.1	ZNF354C	0.169	1	579	0.32401
MA1419.1	IRF4	0.17	0.999	578	0.32462
MA0812.1	TFAP2B(var.2)	0.171	1	579	0.32462
MA0030.1	FOXF2	0.171	1	579	0.32462
MA0853.1	Alx4	0.173	1	579	0.327343
MA0802.1	TBR1	0.175	1	579	0.330049
MA0703.1	LMX1B	0.177	1	579	0.33166
MA0468.1	DUX4	0.177	1	579	0.33166
MA0822.1	HES7	0.182	1	579	0.336671
MA1148.1	PPARA::RXRA	0.182	1	579	0.336671
MA0852.2	FOXK1	0.181	1	579	0.336671
MA0690.1	TBX21	0.181	1	579	0.336671
MA0508.2	PRDM1	0.183	1	579	0.337443
MA0816.1	Ascl2	0.185	1	579	0.340048
MA0661.1	MEOX1	0.186	1	579	0.340804
MA0521.1	Tcf12	0.187	1	579	0.341555
MA0728.1	Nr2f6(var.2)	0.198	0.999	579	0.344973
MA0162.3	EGR1	0.198	1	579	0.344973
MA0592.2	Esrra	0.192	1	579	0.344973
MA1420.1	IRF5	0.198	1	579	0.344973
MA1129.1	FOSL1::JUN(var.2)	0.199	1	579	0.344973
MA0903.1	HOXB3	0.199	1	579	0.344973
MA0896.1	Hmx1	0.198	1	579	0.344973
MA0808.1	TEAD3	0.198	1	579	0.344973
MA0721.1	UNCX	0.198	1	579	0.344973
MA0717.1	RAX2	0.197	1	579	0.344973
MA0660.1	MEF2B	0.198	1	579	0.344973
MA0043.2	HLF	0.193	1	579	0.344973
MA0027.2	EN1	0.193	1	579	0.344973
MA0497.1	MEF2C	0.198	1	579	0.344973
MA0499.1	Myod1	0.192	1	579	0.344973
MA0146.2	Zfx	0.198	1	579	0.344973
MA0087.1	Sox5	0.198	1	579	0.344973
MA0591.1	Bach1::Mafk	0.201	1	579	0.3474
MA0809.1	TEAD4	0.204	1	579	0.350493
MA0704.1	Lhx4	0.204	1	579	0.350493
MA0516.1	SP2	0.205	1	579	0.351169
MA0843.1	TEF	0.207	1	579	0.353173
MA0623.1	Neurog1	0.208	1	579	0.353173
MA0111.1	Spz1	0.208	1	579	0.353173
MA0500.1	Myog	0.209	1	579	0.353833
MA1140.1	JUNB(var.2)	0.214	1	579	0.357078
MA1116.1	RBPJ	0.214	1	579	0.357078
MA0814.1	TFAP2C(var.2)	0.214	1	579	0.357078
MA0639.1	DBP	0.213	1	579	0.357078
MA0062.2	Gabpa	0.214	1	579	0.357078
MA0664.1	MLXIPL	0.216	1	579	0.359379
MA1107.1	KLF9	0.22	1	579	0.359831
MA0711.1	OTX1	0.22	1	579	0.359831
MA0686.1	SPDEF	0.22	1	579	0.359831
MA0594.1	Hoxa9	0.22	1	579	0.359831
MA0093.2	USF1	0.218	1	579	0.359831
MA0513.1	SMAD2::SMAD3::SMAD4	0.218	1	579	0.359831
MA0642.1	EN2	0.225	1	579	0.366972
MA0732.1	EGR3	0.226	1	579	0.367567
MA0652.1	IRF8	0.23	1	579	0.368892
MA0893.1	GSX2	0.228	1	579	0.368892
MA0834.1	ATF7	0.229	1	579	0.368892
MA0803.1	TBX15	0.23	1	579	0.368892
MA0473.2	ELF1	0.23	1	579	0.368892
MA0902.1	HOXB2	0.232	1	579	0.369033
MA0701.1	LHX9	0.232	1	579	0.369033
MA0135.1	Lhx3	0.232	1	579	0.369033
MA0779.1	PAX1	0.233	0.996	577	0.369608
MA0493.1	Klf1	0.235	1	579	0.371762
MA0817.1	BHLHE23	0.237	1	579	0.373905
MA0039.3	KLF4	0.24	1	579	0.377609
MA1117.1	RELB	0.241	1	579	0.378154
MA1136.1	FOSB::JUNB(var.2)	0.243	1	579	0.380262
MA0829.1	Srebf1(var.2)	0.245	1	579	0.380308
MA0767.1	GCM2	0.245	1	579	0.380308
MA0705.1	Lhx8	0.244	1	579	0.380308
MA0634.1	ALX3	0.247	1	579	0.382388
MA0681.1	Phox2b	0.248	1	579	0.382912
MA0713.1	PHOX2A	0.249	1	579	0.383434
MA0825.1	MNT	0.251	1	579	0.385488
MA1145.1	FOSL2::JUND(var.2)	0.256	1	579	0.391052
MA0862.1	GMEB2	0.256	1	579	0.391052
MA0851.1	Foxj3	0.258	1	579	0.391052
MA0662.1	MIXL1	0.258	1	579	0.391052
MA0607.1	Bhlha15	0.257	1	579	0.391052
MA0038.1	Gfi1	0.26	1	579	0.393055
MA0641.1	ELF4	0.261	1	579	0.393539
MA0007.3	Ar	0.266	1	579	0.393898
MA0683.1	POU4F2	0.266	1	579	0.393898
MA1151.1	RORC	0.266	1	579	0.393898
MA1124.1	ZNF24	0.266	1	579	0.393898
MA0131.2	HINFP	0.266	1	579	0.393898
MA0463.1	Bcl6	0.266	1	579	0.393898
MA0155.1	INSM1	0.266	1	579	0.393898
MA0789.1	POU3F4	0.267	1	579	0.39437
MA1152.1	SOX15	0.27	1	579	0.396615
MA0894.1	HESX1	0.272	1	579	0.396615
MA0145.3	TFCP2	0.273	1	579	0.396615
MA0646.1	GCM1	0.27	1	579	0.396615
MA0605.1	Atf3	0.274	1	579	0.396615
MA0484.1	HNF4G	0.274	1	579	0.396615
MA0506.1	NRF1	0.273	1	579	0.396615
MA0125.1	Nobox	0.273	1	579	0.396615
MA0160.1	NR4A2	0.276	1	579	0.398514
MA0471.1	E2F6	0.277	1	579	0.398963
MA0883.1	Dmbx1	0.281	1	579	0.399752
MA0819.1	CLOCK	0.281	1	579	0.399752
MA0778.1	NFKB2	0.279	1	579	0.399752
MA0046.2	HNF1A	0.28	1	579	0.399752
MA0477.1	FOSL1	0.28	1	579	0.399752
MA0841.1	NFE2	0.283	1	579	0.40161
MA0032.2	FOXC1	0.286	1	579	0.402905
MA0678.1	OLIG2	0.286	1	579	0.402905
MA0672.1	NKX2-3	0.285	1	579	0.402905
MA0866.1	SOX21	0.298	0.998	578	0.403136
MA0088.2	ZNF143	0.295	1	579	0.403136
MA0898.1	Hmx3	0.298	1	579	0.403136
MA0891.1	GSC2	0.296	1	579	0.403136
MA0876.1	BSX	0.298	1	579	0.403136
MA0828.1	SREBF2(var.2)	0.293	1	579	0.403136
MA0716.1	PRRX1	0.296	1	579	0.403136
MA0714.1	PITX3	0.29	1	579	0.403136
MA0124.2	Nkx3-1	0.298	1	579	0.403136
MA0699.1	LBX2	0.293	1	579	0.403136
MA0655.1	JDP2	0.298	1	579	0.403136
MA0644.1	ESX1	0.298	1	579	0.403136
MA0643.1	Esrrg	0.29	1	579	0.403136
MA1099.1	Hes1	0.298	1	579	0.403136
MA0163.1	PLAG1	0.295	1	579	0.403136
MA0025.1	NFIL3	0.297	1	579	0.403136
MA0019.1	Ddit3::Cebpa	0.297	1	579	0.403136
MA0100.3	MYB	0.302	1	579	0.407594
MA1111.1	NR2F2	0.308	1	579	0.413002
MA1105.1	GRHL2	0.311	1	579	0.413002
MA1100.1	ASCL1	0.309	1	579	0.413002
MA0464.2	BHLHE40	0.309	1	579	0.413002
MA0726.1	VSX2	0.311	1	579	0.413002
MA0709.1	Msx3	0.307	1	579	0.413002
MA0658.1	LHX6	0.31	1	579	0.413002
MA0827.1	OLIG3	0.313	1	579	0.414707
MA0720.1	Shox2	0.314	1	579	0.415082
MA0832.1	Tcf21	0.315	1	579	0.415456
MA0718.1	RAX	0.318	1	579	0.418459
MA0050.2	IRF1	0.323	1	579	0.424075
MA0654.1	ISX	0.324	1	579	0.424425
MA0744.1	SCRT2	0.328	1	579	0.426769
MA0603.1	Arntl	0.327	1	579	0.426769
MA0505.1	Nr5a2	0.328	1	579	0.426769
MA0622.1	Mlxip	0.329	1	579	0.42711
MA0058.3	MAX	0.342	1	579	0.442993
MA0805.1	TBX1	0.343	1	579	0.443297
MA0052.3	MEF2A	0.351	1	579	0.450619
MA0068.2	PAX4	0.351	1	579	0.450619
MA0101.1	REL	0.351	1	579	0.450619
MA0846.1	FOXC2	0.358	1	579	0.451595
MA0461.2	Atoh1	0.358	1	579	0.451595
MA0801.1	MGA	0.356	1	579	0.451595
MA0743.1	SCRT1	0.358	1	579	0.451595
MA0122.2	NKX3-2	0.358	1	579	0.451595
MA0708.1	MSX2	0.356	1	579	0.451595
MA0489.1	JUN(var.2)	0.358	1	579	0.451595
MA0041.1	Foxd3	0.358	1	579	0.451595
MA0076.2	ELK4	0.36	1	579	0.45313
MA0621.1	mix-a	0.363	1	579	0.454929
MA0144.2	STAT3	0.363	1	579	0.454929
MA0004.1	Arnt	0.364	1	579	0.455197
MA0636.1	BHLHE41	0.368	1	579	0.459207
MA0751.1	ZIC4	0.37	1	579	0.46071
MA0777.1	MYBL2	0.375	1	579	0.465933
MA0476.1	FOS	0.376	1	579	0.466176
MA0913.1	Hoxd9	0.379	1	579	0.468891
MA0833.1	ATF4	0.38	1	579	0.469126
MA0515.1	Sox6	0.391	1	579	0.481679
MA0491.1	JUND	0.392	1	579	0.481885
MA0792.1	POU5F1B	0.395	1	579	0.484544
MA0653.1	IRF9	0.406	1	579	0.495937
MA0877.1	Barhl1	0.406	1	579	0.495937
MA1150.1	RORB	0.407	1	579	0.496112
MA0855.1	RXRB	0.416	1	579	0.506017
MA1134.1	FOS::JUNB	0.421	1	579	0.509956
MA0512.2	Rxra	0.421	1	579	0.509956
MA0047.2	Foxa2	0.428	1	579	0.516275
MA0059.1	MAX::MYC	0.428	1	579	0.516275
MA0874.1	Arx	0.431	1	579	0.518813
MA0835.1	BATF3	0.437	1	579	0.524944
MA0108.2	TBP	0.443	1	579	0.53105
MA0856.1	RXRG	0.45	1	579	0.538326
MA0648.1	GSC	0.457	1	579	0.545573
MA0113.3	NR3C1	0.462	1	579	0.548152
MA0818.1	BHLHE22	0.462	1	579	0.548152
MA0773.1	MEF2D	0.462	1	579	0.548152
MA0107.1	RELA	0.465	1	579	0.550583
MA0148.3	FOXA1	0.466	1	579	0.550641
MA0666.1	MSX1	0.472	1	579	0.556595
MA0914.1	ISL2	0.477	1	579	0.561348
MA1135.1	FOSB::JUNB	0.48	1	579	0.563732
MA0074.1	RXRA::VDR	0.485	1	579	0.566159
MA0875.1	BARX1	0.485	1	579	0.566159
MA0826.1	OLIG1	0.485	1	579	0.566159
MA0510.2	RFX5	0.486	1	579	0.566185
MA1144.1	FOSL2::JUND	0.494	1	579	0.573198
MA1138.1	FOSL2::JUNB	0.494	1	579	0.573198
MA1122.1	TFDP1	0.496	1	579	0.574368
MA0844.1	XBP1	0.502	1	579	0.580156
MA0821.1	HES5	0.508	1	579	0.58592
MA0698.1	ZBTB18	0.516	1	579	0.593964
MA0897.1	Hmx2	0.519	1	579	0.596232
MA0600.2	RFX2	0.521	1	579	0.597272
MA0791.1	POU4F3	0.523	1	579	0.597272
MA0696.1	ZIC1	0.522	1	579	0.597272
MA0727.1	NR3C2	0.529	1	579	0.60175
MA0719.1	RHOXF1	0.529	1	579	0.60175
MA0733.1	EGR4	0.535	1	579	0.607382
MA0799.1	RFX4	0.549	1	579	0.620842
MA0509.1	Rfx1	0.549	1	579	0.620842
MA0091.1	TAL1::TCF3	0.558	1	579	0.629789
MA0092.1	Hand1::Tcf3	0.565	1	579	0.636449
MA0724.1	VENTX	0.569	1	579	0.637236
MA0697.1	ZIC3	0.569	1	579	0.637236
MA0492.1	JUND(var.2)	0.568	1	579	0.637236
MA0889.1	GBX1	0.587	1	579	0.656125
MA0258.2	ESR2	0.596	1	579	0.664902
MA0478.1	FOSL2	0.601	1	579	0.66919
MA0865.1	E2F8	0.605	1	579	0.672351
MA0099.3	FOS::JUN	0.61	1	579	0.676609
MA0470.1	E2F4	0.616	1	579	0.681958
MA0663.1	MLX	0.628	1	579	0.693916
MA1141.1	FOS::JUND	0.632	1	579	0.697006
MA0024.3	E2F1	0.636	1	579	0.700084
MA0009.2	T	0.639	1	579	0.702051
MA0870.1	Sox1	0.654	1	579	0.715815
MA0490.1	JUNB	0.654	1	579	0.715815
MA0626.1	Npas2	0.665	1	579	0.726481
MA0104.4	MYCN	0.67	1	579	0.730565
MA1155.1	ZSCAN4	0.684	1	579	0.744429
MA0790.1	POU4F1	0.697	1	579	0.757154
MA0797.1	TGIF2	0.713	1	579	0.773084
MA0823.1	HEY1	0.718	1	579	0.77705
MA0259.1	ARNT::HIF1A	0.722	1	579	0.779922
MA1130.1	FOSL2::JUN	0.725	1	579	0.781704
MA1128.1	FOSL1::JUN	0.728	1	579	0.78348
MA0863.1	MTF1	0.735	1	579	0.788083
MA0798.1	RFX3	0.735	1	579	0.788083
MA1108.1	MXI1	0.745	1	579	0.795858
MA1106.1	HIF1A	0.745	1	579	0.795858
MA0859.1	Rarg	0.747	1	579	0.796525
MA0637.1	CENPB	0.755	1	579	0.803575
MA1125.1	ZNF384	0.76	1	579	0.807413
MA0147.3	MYC	0.77	1	579	0.816104
MA0071.1	RORA	0.771	1	579	0.816104
MA0649.1	HEY2	0.784	1	579	0.82835
MA0116.1	Znf423	0.843	1	579	0.888502
MA0072.1	RORA(var.2)	0.844	1	579	0.888502
MA0794.1	PROX1	0.922	1	579	0.968853
MA0736.1	GLIS2	0.947	1	579	0.993321
MA0869.1	Sox11	1	1	579	1
MA0867.1	SOX4	1	1	579	1
MA0735.1	GLIS1	1	1	579	1
MA0868.1	SOX8	1	1	579	1
MA0864.1	E2F2	1	1	579	1
MA0861.1	TP73	1	1	579	1
MA0106.3	TP53	1	1	579	1
MA0525.2	TP63	1	1	579	1
MA0860.1	Rarg(var.2)	1	1	579	1
MA0857.1	Rarb	1	1	579	1
MA0804.1	TBX19	1	1	579	1
MA0796.1	TGIF1	1	1	579	1
MA0783.1	PKNOX2	1	1	579	1
MA0782.1	PKNOX1	1	1	579	1
MA0781.1	PAX9	1	1	579	1
MA0105.4	NFKB1	1	1	579	1
MA0758.1	E2F7	1	1	579	1
MA0469.2	E2F3	1	1	579	1
MA0752.1	ZNF410	1	1	579	1
MA0749.1	ZBED1	1	1	579	1
MA0737.1	GLIS3	1	1	579	1
MA0114.3	Hnf4a	1	1	579	1
MA0083.3	SRF	1	1	579	1
MA0138.2	REST	1	1	579	1
MA0115.1	NR1H2::RXRA	1	1	579	1
MA0066.1	PPARG	1	1	579	1
MA0051.1	IRF2	1	1	579	1

## Sheet: Cluster2
id	name	p-value	adj_p.value	evalue	padj
MA0745.1	SNAI2	1.35e-06	0.00475	2.75	0.00078165
MA1134.1	FOS::JUNB	6.56e-06	0.0057	3.3	0.00123037
MA0490.1	JUNB	9.14e-06	0.00794	4.6	0.00123037
MA1144.1	FOSL2::JUND	1.18e-05	0.0121	7	0.00123037
MA1141.1	FOS::JUND	1.53e-05	0.0147	8.49	0.00123037
MA0491.1	JUND	2.55e-05	0.0148	8.59	0.00123037
MA0477.1	FOSL1	1.94e-05	0.0151	8.73	0.00123037
MA1135.1	FOSB::JUNB	1.52e-05	0.0162	9.36	0.00123037
MA0807.1	TBX5	6.39e-06	0.0196	11.3	0.00123037
MA1138.1	FOSL2::JUNB	2.2e-05	0.0229	13.3	0.00123037
MA1130.1	FOSL2::JUN	1.98e-05	0.025	14.5	0.00123037
MA0599.1	KLF5	2.52e-05	0.177	102	0.00123037
MA0478.1	FOSL2	3.08e-05	0.0224	12.9	0.00137178
MA0056.1	MZF1	3.95e-05	0.255	148	0.00163361
MA0099.3	FOS::JUN	4.33e-05	0.0558	32.3	0.00166463
MA0739.1	Hic1	4.6e-05	0.0776	45	0.00166463
MA1128.1	FOSL1::JUN	4.89e-05	0.0554	32.1	0.00166548
MA0048.2	NHLH1	5.55e-05	0.113	65.2	0.00178525
MA0746.1	SP3	6.96e-05	0.372	216	0.00212097
MA0065.2	Pparg::Rxra	9.44e-05	0.175	101	0.00273288
MA1142.1	FOSL1::JUND	0.000104	0.29	168	0.00286743
MA0462.1	BATF::JUN	0.000133	0.129	74.8	0.00350032
MA0103.3	ZEB1	0.000174	0.498	288	0.00438026
MA0476.1	FOS	0.000205	0.177	103	0.00494563
MA0513.1	SMAD2::SMAD3::SMAD4	0.000406	0.348	202	0.00938807
MA0803.1	TBX15	0.000435	0.368	213	0.00938807
MA1137.1	FOSL1::JUNB	0.000445	0.634	367	0.00938807
MA0522.2	TCF3	0.000454	0.765	443	0.00938807
MA1113.1	PBX2	0.000536	0.551	319	0.0107015
MA0824.1	ID4	0.000606	0.75	434	0.0116958
MA0805.1	TBX1	0.00066	0.537	311	0.0120323
MA0079.3	SP1	0.000665	0.996	577	0.0120323
MA1107.1	KLF9	0.00069	0.818	474	0.0121064
MA0753.1	ZNF740	0.000843	0.834	483	0.0143558
MA0806.1	TBX4	0.00102	0.904	523	0.0167267
MA0830.1	TCF4	0.00104	0.96	556	0.0167267
MA1148.1	PPARA::RXRA	0.00122	0.469	272	0.0188937
MA0747.1	SP8	0.00124	0.996	577	0.0188937
MA0607.1	Bhlha15	0.00134	0.867	502	0.019686
MA0738.1	HIC2	0.00136	0.969	561	0.019686
MA0498.2	MEIS1	0.00151	0.996	577	0.0213241
MA0810.1	TFAP2A(var.2)	0.00163	0.995	576	0.0224707
MA0499.1	Myod1	0.00182	0.992	574	0.0245065
MA0489.1	JUN(var.2)	0.00206	0.808	468	0.0271077
MA0816.1	Ascl2	0.00215	0.991	574	0.0276633
MA0801.1	MGA	0.00229	0.981	568	0.0288241
MA0524.2	TFAP2C	0.00282	0.999	579	0.03474
MA0117.2	Mafb	0.00289	0.986	571	0.0348606
MA0039.3	KLF4	0.00304	0.999	579	0.0352032
MA0775.1	MEIS3	0.00299	1	579	0.0352032
MA0671.1	NFIX	0.00314	1	579	0.0356482
MA0597.1	THAP1	0.00323	1	579	0.0359648
MA0655.1	JDP2	0.00344	0.738	427	0.0375804
MA0500.1	Myog	0.00361	1	579	0.0387072
MA0685.1	SP4	0.0038	0.978	566	0.0400036
MA0488.1	JUN	0.00434	0.936	542	0.0428853
MA0774.1	MEIS2	0.00435	1	579	0.0428853
MA0811.1	TFAP2B	0.00437	1	579	0.0428853
MA0101.1	REL	0.00426	1	579	0.0428853
MA0047.2	Foxa2	0.00459	1	579	0.0435674
MA0493.1	Klf1	0.00457	1	579	0.0435674
MA0724.1	VENTX	0.00477	1	579	0.0445456
MA0107.1	RELA	0.00496	0.994	576	0.0447166
MA0793.1	POU6F2	0.00489	0.999	579	0.0447166
MA0002.2	RUNX1	0.00502	1	579	0.0447166
MA1100.1	ASCL1	0.00531	1	579	0.0465832
MA0037.3	GATA3	0.00571	1	579	0.0493446
MA0786.1	POU3F1	0.00584	1	579	0.0497259
MA1114.1	PBX3	0.00599	0.998	578	0.0502639
MA0066.1	PPARG	0.00655	0.146	84.5	0.0541779
MA1121.1	TEAD2	0.00713	1	579	0.0581446
MA0164.1	Nr2e3	0.00752	0.999	578	0.0584404
MA0789.1	POU3F4	0.00757	1	579	0.0584404
MA0894.1	HESX1	0.00747	1	579	0.0584404
MA0766.1	GATA5	0.00745	1	579	0.0584404
MA0155.1	INSM1	0.00894	1	579	0.0681087
MA0484.1	HNF4G	0.0092	1	579	0.0691792
MA0730.1	RARA(var.2)	0.0109	0.17	98.7	0.0717457
MA0009.2	T	0.0109	0.334	193	0.0717457
MA0657.1	KLF13	0.0109	0.64	371	0.0717457
MA0116.1	Znf423	0.0114	0.729	422	0.0717457
MA0794.1	PROX1	0.0109	0.776	449	0.0717457
MA0841.1	NFE2	0.0111	0.81	469	0.0717457
MA0736.1	GLIS2	0.0109	0.927	537	0.0717457
MA0141.3	ESRRB	0.0113	0.963	557	0.0717457
MA0843.1	TEF	0.0109	0.979	567	0.0717457
MA0154.3	EBF1	0.0113	0.982	569	0.0717457
MA0643.1	Esrrg	0.0109	1	579	0.0717457
MA0740.1	KLF14	0.0104	1	579	0.0717457
MA1132.1	JUN::JUNB	0.0101	1	579	0.0717457
MA0714.1	PITX3	0.0107	1	579	0.0717457
MA0809.1	TEAD4	0.0114	1	579	0.0717457
MA1110.1	NR1H4	0.0118	1	579	0.072683
MA0700.1	LHX2	0.0117	1	579	0.072683
MA0890.1	GBX2	0.0122	1	579	0.0743558
MA0521.1	Tcf12	0.0127	1	579	0.0750337
MA0718.1	RAX	0.0127	1	579	0.0750337
MA0092.1	Hand1::Tcf3	0.0126	1	579	0.0750337
MA1111.1	NR2F2	0.0134	1	579	0.0783697
MA0592.2	Esrra	0.0144	0.907	525	0.082025
MA1149.1	RARA::RXRG	0.0148	0.997	577	0.082025
MA0504.1	NR2C2	0.0153	1	579	0.082025
MA0071.1	RORA	0.0152	1	579	0.082025
MA0661.1	MEOX1	0.0149	1	579	0.082025
MA0792.1	POU5F1B	0.0149	1	579	0.082025
MA0719.1	RHOXF1	0.0148	1	579	0.082025
MA0673.1	NKX2-8	0.0148	1	579	0.082025
MA0644.1	ESX1	0.0152	1	579	0.082025
MA0732.1	EGR3	0.0159	0.999	578	0.0844596
MA0741.1	KLF16	0.0163	1	579	0.0857973
MA0069.1	Pax6	0.0165	0.998	578	0.0858161
MA0725.1	VSX1	0.0166	1	579	0.0858161
MA1119.1	SIX2	0.0172	1	579	0.08685
MA0787.1	POU3F2	0.0174	1	579	0.08685
MA1115.1	POU5F1	0.0172	1	579	0.08685
MA0081.1	SPIB	0.0173	1	579	0.08685
MA0152.1	NFATC2	0.018	1	579	0.0890769
MA0258.2	ESR2	0.0189	1	579	0.091675
MA0688.1	TBX2	0.019	1	579	0.091675
MA1150.1	RORB	0.0189	1	579	0.091675
MA0709.1	Msx3	0.0192	1	579	0.0918744
MA0100.3	MYB	0.0198	1	579	0.0924532
MA0808.1	TEAD3	0.0198	1	579	0.0924532
MA0699.1	LBX2	0.0198	1	579	0.0924532
MA0080.4	SPI1	0.021	0.946	548	0.0925523
MA0014.3	PAX5	0.021	1	579	0.0925523
MA0813.1	TFAP2B(var.3)	0.0204	1	579	0.0925523
MA0910.1	Hoxd8	0.0202	1	579	0.0925523
MA0520.1	Stat6	0.021	1	579	0.0925523
MA0654.1	ISX	0.0211	1	579	0.0925523
MA0508.2	PRDM1	0.021	1	579	0.0925523
MA0648.1	GSC	0.0202	1	579	0.0925523
MA0689.1	TBX20	0.0213	1	579	0.0927271
MA0507.1	POU2F2	0.0216	1	579	0.0933313
MA0842.1	NRL	0.0227	1	579	0.0973578
MA1123.1	TWIST1	0.0231	1	579	0.0983449
MA0153.2	HNF1B	0.0236	1	579	0.0990174
MA0036.3	GATA2	0.0235	1	579	0.0990174
MA0690.1	TBX21	0.0253	1	579	0.105386
MA0785.1	POU2F1	0.0257	1	579	0.106288
MA0737.1	GLIS3	0.0265	0.576	334	0.108107
MA1102.1	CTCFL	0.0267	1	579	0.108107
MA0687.1	SPIC	0.0266	1	579	0.108107
MA0631.1	Six3	0.0272	0.987	572	0.109367
MA0158.1	HOXA5	0.0275	1	579	0.10981
MA0472.2	EGR2	0.0277	1	579	0.109851
MA0701.1	LHX9	0.0292	1	579	0.114235
MA0090.2	TEAD1	0.0291	1	579	0.114235
MA0804.1	TBX19	0.0296	0.77	446	0.114256
MA0720.1	Shox2	0.0295	1	579	0.114256
MA0788.1	POU3F3	0.0305	1	579	0.11695
MA0029.1	Mecom	0.0315	0.991	574	0.117248
MA0163.1	PLAG1	0.0319	1	579	0.117248
MA0621.1	mix-a	0.032	1	579	0.117248
MA0879.1	Dlx1	0.0322	1	579	0.117248
MA0726.1	VSX2	0.0318	1	579	0.117248
MA0710.1	NOTO	0.0309	1	579	0.117248
MA0075.2	Prrx2	0.0315	1	579	0.117248
MA0630.1	SHOX	0.0324	1	579	0.117248
MA0612.1	EMX1	0.032	1	579	0.117248
MA0142.1	Pou5f1::Sox2	0.0335	1	579	0.119731
MA0634.1	ALX3	0.0335	1	579	0.119731
MA0707.1	MNX1	0.0348	1	579	0.123615
MA1105.1	GRHL2	0.0371	1	579	0.128628
MA1104.1	GATA6	0.0369	1	579	0.128628
MA0003.3	TFAP2A	0.0365	1	579	0.128628
MA0628.1	POU6F1	0.0369	1	579	0.128628
MA0891.1	GSC2	0.0384	1	579	0.132343
MA1101.1	BACH2	0.0396	1	579	0.134084
MA1125.1	ZNF384	0.0394	1	579	0.134084
MA0125.1	Nobox	0.0392	1	579	0.134084
MA1124.1	ZNF24	0.0405	1	579	0.135433
MA0885.1	Dlx2	0.0404	1	579	0.135433
MA0670.1	NFIA	0.0407	1	579	0.135433
MA0889.1	GBX1	0.0421	1	579	0.138371
MA0820.1	FIGLA	0.0423	1	579	0.138371
MA0682.1	Pitx1	0.042	1	579	0.138371
MA0827.1	OLIG3	0.043	1	579	0.139024
MA0042.2	FOXI1	0.0434	1	579	0.139024
MA0618.1	LBX1	0.043	1	579	0.139024
MA0050.2	IRF1	0.0437	1	579	0.139024
MA0516.1	SP2	0.0436	1	579	0.139024
MA0674.1	NKX6-1	0.0464	1	579	0.146807
MA1112.1	NR4A1	0.0468	1	579	0.147072
MA0886.1	EMX2	0.0475	1	579	0.147072
MA0722.1	VAX1	0.0475	1	579	0.147072
MA0716.1	PRRX1	0.0474	1	579	0.147072
MA0799.1	RFX4	0.0483	1	579	0.148754
MA0017.2	NR2F1	0.0497	1	579	0.152256
MA1118.1	SIX1	0.05	1	579	0.152368
MA0624.1	NFATC1	0.0504	1	579	0.152783
MA0492.1	JUND(var.2)	0.052	1	579	0.1544
MA0896.1	Hmx1	0.052	1	579	0.1544
MA1109.1	NEUROD1	0.0515	1	579	0.1544
MA0067.1	Pax2	0.0515	1	579	0.1544
MA1151.1	RORC	0.053	1	579	0.156566
MA0858.1	Rarb(var.2)	0.0617	0.225	130	0.158775
MA0138.2	REST	0.0617	0.809	468	0.158775
MA0074.1	RXRA::VDR	0.0617	0.947	548	0.158775
MA0683.1	POU4F2	0.0617	0.999	579	0.158775
MA0797.1	TGIF2	0.0576	0.999	579	0.158775
MA0679.1	ONECUT1	0.0617	1	579	0.158775
MA0073.1	RREB1	0.0617	1	579	0.158775
MA0139.1	CTCF	0.06	1	579	0.158775
MA0140.2	GATA1::TAL1	0.0565	1	579	0.158775
MA0442.2	SOX10	0.0617	1	579	0.158775
MA0161.2	NFIC	0.0617	1	579	0.158775
MA0883.1	Dmbx1	0.0617	1	579	0.158775
MA0875.1	BARX1	0.0617	1	579	0.158775
MA0849.1	FOXO6	0.0541	1	579	0.158775
MA0848.1	FOXO4	0.0586	1	579	0.158775
MA0845.1	FOXB1	0.0617	1	579	0.158775
MA0815.1	TFAP2C(var.3)	0.0597	1	579	0.158775
MA0791.1	POU4F3	0.0617	1	579	0.158775
MA0790.1	POU4F1	0.0617	1	579	0.158775
MA0717.1	RAX2	0.0548	1	579	0.158775
MA0645.1	ETV6	0.0617	1	579	0.158775
MA0136.2	ELF5	0.055	1	579	0.158775
MA0627.1	Pou2f3	0.0603	1	579	0.158775
MA0594.1	Hoxa9	0.06	1	579	0.158775
MA0148.3	FOXA1	0.0578	1	579	0.158775
MA0463.1	Bcl6	0.0617	1	579	0.158775
MA0479.1	FOXH1	0.0584	1	579	0.158775
MA0057.1	MZF1(var.2)	0.0617	1	579	0.158775
MA0031.1	FOXD1	0.0545	1	579	0.158775
MA0528.1	ZNF263	0.062	1	579	0.158841
MA0814.1	TFAP2C(var.2)	0.0627	1	579	0.159926
MA0089.1	MAFG::NFE2L1	0.063	1	579	0.159987
MA0106.3	TP53	0.0649	0.825	478	0.160586
MA0833.1	ATF4	0.0649	1	579	0.160586
MA0639.1	DBP	0.0649	1	579	0.160586
MA0676.1	Nr2e1	0.0636	1	579	0.160586
MA0658.1	LHX6	0.064	1	579	0.160586
MA0623.1	Neurog1	0.0649	1	579	0.160586
MA0784.1	POU1F1	0.0661	1	579	0.162859
MA0698.1	ZBTB18	0.0664	1	579	0.162905
MA0691.1	TFAP4	0.0672	1	579	0.163767
MA0613.1	FOXG1	0.0676	1	579	0.163767
MA0035.3	Gata1	0.0674	1	579	0.163767
MA0881.1	Dlx4	0.0682	1	579	0.16433
MA0802.1	TBR1	0.0684	1	579	0.16433
MA0603.1	Arntl	0.0697	1	579	0.166762
MA0467.1	Crx	0.0731	1	579	0.174177
MA0130.1	ZNF354C	0.0739	1	579	0.175361
MA0667.1	MYF6	0.0753	1	579	0.177954
MA0517.1	STAT1::STAT2	0.0767	1	579	0.180526
MA0696.1	ZIC1	0.0778	1	579	0.181638
MA1145.1	FOSL2::JUND(var.2)	0.0775	1	579	0.181638
MA0897.1	Hmx2	0.0784	1	579	0.182304
MA0854.1	Alx1	0.08	1	579	0.18528
MA0608.1	Creb3l2	0.0806	1	579	0.185926
MA1420.1	IRF5	0.0815	1	579	0.186237
MA0887.1	EVX1	0.0814	1	579	0.186237
MA0723.1	VAX2	0.0817	1	579	0.186237
MA0503.1	Nkx2-5(var.2)	0.0822	1	579	0.186642
MA0132.2	PDX1	0.0829	1	579	0.187496
MA0712.1	OTX2	0.0833	1	579	0.187668
MA0040.1	Foxq1	0.0837	1	579	0.187838
MA0778.1	NFKB2	0.0844	1	579	0.187952
MA0482.1	Gata4	0.0842	1	579	0.187952
MA0666.1	MSX1	0.0851	1	579	0.188785
MA0888.1	EVX2	0.086	1	579	0.189331
MA0772.1	IRF7	0.086	1	579	0.189331
MA0751.1	ZIC4	0.0878	1	579	0.192561
MA0882.1	DLX6	0.0886	1	579	0.192566
MA0853.1	Alx4	0.0886	1	579	0.192566
MA0812.1	TFAP2B(var.2)	0.0888	1	579	0.192566
MA0647.1	GRHL1	0.0907	1	579	0.195953
MA0903.1	HOXB3	0.0914	1	579	0.196002
MA0595.1	SREBF1	0.0911	1	579	0.196002
MA0068.2	PAX4	0.0924	1	579	0.197415
MA1117.1	RELB	0.0941	1	579	0.200308
MA0850.1	FOXP3	0.096	1	579	0.203604
MA0880.1	Dlx3	0.0977	1	579	0.204218
MA0706.1	MEOX2	0.0971	1	579	0.204218
MA0625.1	NFATC3	0.0977	1	579	0.204218
MA0610.1	DMRT3	0.0977	1	579	0.204218
MA0104.4	MYCN	0.101	1	579	0.20811
MA0018.3	CREB1	0.1	1	579	0.20811
MA0901.1	HOXB13	0.101	1	579	0.20811
MA0708.1	MSX2	0.101	1	579	0.20811
MA0902.1	HOXB2	0.102	1	579	0.208686
MA0523.1	TCF7L2	0.102	1	579	0.208686
MA0847.1	FOXD2	0.104	1	579	0.212028
MA1116.1	RBPJ	0.105	1	579	0.213316
MA0900.1	HOXA2	0.106	1	579	0.214594
MA0914.1	ISL2	0.109	1	579	0.219135
MA0907.1	HOXC13	0.109	1	579	0.219135
MA0135.1	Lhx3	0.11	1	579	0.220381
MA0911.1	Hoxa11	0.112	1	579	0.220571
MA0800.1	EOMES	0.111	1	579	0.220571
MA0721.1	UNCX	0.111	1	579	0.220571
MA0160.1	NR4A2	0.112	1	579	0.220571
MA0087.1	Sox5	0.112	1	579	0.220571
MA0119.1	NFIC::TLX1	0.113	1	579	0.221786
MA1155.1	ZSCAN4	0.12	0.995	576	0.22241
MA1120.1	SOX13	0.12	1	579	0.22241
MA0909.1	HOXD13	0.115	1	579	0.22241
MA0877.1	Barhl1	0.12	1	579	0.22241
MA0838.1	CEBPG	0.12	1	579	0.22241
MA0836.1	CEBPD	0.12	1	579	0.22241
MA0466.2	CEBPB	0.12	1	579	0.22241
MA0767.1	GCM2	0.12	1	579	0.22241
MA0098.3	ETS1	0.121	1	579	0.22241
MA0757.1	ONECUT3	0.12	1	579	0.22241
MA0756.1	ONECUT2	0.12	1	579	0.22241
MA0711.1	OTX1	0.116	1	579	0.22241
MA0678.1	OLIG2	0.115	1	579	0.22241
MA0043.2	HLF	0.12	1	579	0.22241
MA0606.1	NFAT5	0.116	1	579	0.22241
MA0143.3	Sox2	0.121	1	579	0.22241
MA0502.1	NFYB	0.12	1	579	0.22241
MA0515.1	Sox6	0.12	1	579	0.22241
MA0159.1	RARA::RXRA	0.121	1	579	0.22241
MA0030.1	FOXF2	0.12	1	579	0.22241
MA0072.1	RORA(var.2)	0.123	1	579	0.222553
MA1147.1	NR4A2::RXRA	0.123	1	579	0.222553
MA0904.1	Hoxb5	0.123	1	579	0.222553
MA0662.1	MIXL1	0.123	1	579	0.222553
MA0650.1	HOXA13	0.123	1	579	0.222553
MA0019.1	Ddit3::Cebpa	0.124	1	579	0.223664
MA0642.1	EN2	0.125	1	579	0.224767
MA1421.1	TCF7L1	0.126	1	579	0.225864
MA0704.1	Lhx4	0.127	1	579	0.226954
MA0033.2	FOXL1	0.133	1	579	0.236218
MA0598.2	EHF	0.133	1	579	0.236218
MA0702.1	LMX1A	0.137	1	579	0.242578
MA0027.2	EN1	0.142	1	579	0.250665
MA0878.1	CDX1	0.143	1	579	0.2509
MA0675.1	NKX6-2	0.143	1	579	0.2509
MA0635.1	BARHL2	0.144	1	579	0.251891
MA0653.1	IRF9	0.145	0.999	578	0.252877
MA0665.1	MSC	0.147	1	579	0.255595
MA0876.1	BSX	0.15	1	579	0.26003
MA1126.1	FOS::JUN(var.2)	0.151	1	579	0.260982
MA0695.1	ZBTB7C	0.152	1	579	0.261929
MA0872.1	TFAP2A(var.3)	0.153	1	579	0.262869
MA0162.3	EGR1	0.154	1	579	0.263805
MA0481.2	FOXP1	0.156	1	579	0.265659
MA0505.1	Nr5a2	0.156	1	579	0.265659
MA0077.1	SOX9	0.158	1	579	0.268276
MA0795.1	SMAD3	0.161	1	579	0.27257
MA0769.1	Tcf7	0.167	1	579	0.28027
MA0733.1	EGR4	0.167	1	579	0.28027
MA0616.1	Hes2	0.167	1	579	0.28027
MA0512.2	Rxra	0.172	1	579	0.284593
MA0051.1	IRF2	0.174	1	579	0.284593
MA1152.1	SOX15	0.174	1	579	0.284593
MA0837.1	CEBPE	0.174	1	579	0.284593
MA0510.2	RFX5	0.174	1	579	0.284593
MA0798.1	RFX3	0.174	1	579	0.284593
MA0600.2	RFX2	0.174	1	579	0.284593
MA0485.1	Hoxc9	0.174	1	579	0.284593
MA0084.1	SRY	0.174	1	579	0.284593
MA0893.1	GSX2	0.179	1	579	0.290311
MA0762.1	ETV2	0.179	1	579	0.290311
MA0697.1	ZIC3	0.179	1	579	0.290311
MA1146.1	NR1A4::RXRA	0.182	1	579	0.292717
MA0640.1	ELF3	0.182	1	579	0.292717
MA0063.1	Nkx2-5	0.181	1	579	0.292717
MA0465.1	CDX2	0.187	1	579	0.299925
MA0680.1	PAX7	0.189	1	579	0.301463
MA0672.1	NKX2-3	0.189	1	579	0.301463
MA0677.1	Nr2f6	0.192	1	579	0.305407
MA0905.1	HOXC10	0.193	1	579	0.306156
MA0912.1	Hoxd3	0.197	1	579	0.311527
MA0474.2	ERG	0.198	1	579	0.311527
MA0596.1	SREBF2	0.198	1	579	0.311527
MA0157.2	FOXO3	0.201	1	579	0.31539
MA0480.1	Foxo1	0.203	1	579	0.317668
MA0146.2	Zfx	0.205	1	579	0.319933
MA0641.1	ELF4	0.206	1	579	0.320629
MA0038.1	Gfi1	0.208	1	579	0.322874
MA1153.1	Smad4	0.209	1	579	0.323559
MA0831.2	TFE3	0.212	1	579	0.326457
MA0615.1	Gmeb1	0.212	1	579	0.326457
MA0743.1	SCRT1	0.213	1	579	0.327127
MA1131.1	FOSL2::JUN(var.2)	0.216	1	579	0.330857
MA0614.1	Foxj2	0.218	1	579	0.33304
MA0109.1	HLTF	0.22	1	579	0.335211
MA0469.2	E2F3	0.225	0.639	370	0.339258
MA0114.3	Hnf4a	0.225	1	579	0.339258
MA0060.3	NFYA	0.225	1	579	0.339258
MA0742.1	Klf12	0.225	1	579	0.339258
MA0518.1	Stat4	0.227	1	579	0.341384
MA0862.1	GMEB2	0.231	1	579	0.3465
MA0703.1	LMX1B	0.233	1	579	0.348597
MA1419.1	IRF4	0.236	1	579	0.35127
MA0783.1	PKNOX2	0.236	1	579	0.35127
MA0652.1	IRF8	0.239	1	579	0.353013
MA0694.1	ZBTB7B	0.239	1	579	0.353013
MA0475.2	FLI1	0.239	1	579	0.353013
MA0684.1	RUNX3	0.243	1	579	0.357099
MA0668.1	NEUROD2	0.243	1	579	0.357099
MA0855.1	RXRB	0.247	1	579	0.357532
MA0832.1	Tcf21	0.247	1	579	0.357532
MA0750.2	ZBTB7A	0.245	1	579	0.357532
MA0898.1	Hmx3	0.247	1	579	0.357532
MA0892.1	GSX1	0.245	1	579	0.357532
MA0760.1	ERF	0.247	1	579	0.357532
MA0032.2	FOXC1	0.248	1	579	0.358085
MA0651.1	HOXC11	0.252	1	579	0.362955
MA0780.1	PAX3	0.253	1	579	0.363491
MA0483.1	Gfi1b	0.255	1	579	0.365458
MA0782.1	PKNOX1	0.259	1	579	0.368455
MA0637.1	CENPB	0.259	1	579	0.368455
MA0601.1	Arid3b	0.259	1	579	0.368455
MA0633.1	Twist2	0.26	1	579	0.368971
MA0681.1	Phox2b	0.261	1	579	0.369484
MA0908.1	HOXD11	0.264	1	579	0.37282
MA1139.1	FOSL2::JUNB(var.2)	0.268	1	579	0.377547
MA0115.1	NR1H2::RXRA	0.273	0.796	461	0.378151
MA0495.2	MAFF	0.273	1	579	0.378151
MA0899.1	HOXA10	0.273	1	579	0.378151
MA0024.3	E2F1	0.273	1	579	0.378151
MA0636.1	BHLHE41	0.273	1	579	0.378151
MA0611.1	Dux	0.273	1	579	0.378151
MA0591.1	Bach1::Mafk	0.273	1	579	0.378151
MA1127.1	FOSB::JUN	0.281	1	579	0.387379
MA0826.1	OLIG1	0.281	1	579	0.387379
MA0705.1	Lhx8	0.283	1	579	0.388287
MA0070.1	PBX1	0.283	1	579	0.388287
MA0102.3	CEBPA	0.289	1	579	0.395582
MA0006.1	Ahr::Arnt	0.294	1	579	0.401476
MA0846.1	FOXC2	0.305	1	579	0.414542
MA0713.1	PHOX2A	0.305	1	579	0.414542
MA0817.1	BHLHE23	0.306	1	579	0.414927
MA0821.1	HES5	0.316	1	579	0.42451
MA0149.1	EWSR1-FLI1	0.315	1	579	0.42451
MA0659.1	MAFG	0.315	1	579	0.42451
MA0046.2	HNF1A	0.316	1	579	0.42451
MA0874.1	Arx	0.319	1	579	0.425578
MA0471.1	E2F6	0.319	1	579	0.425578
MA0004.1	Arnt	0.318	1	579	0.425578
MA0145.3	TFCP2	0.321	1	579	0.427262
MA1154.1	ZNF282	0.329	1	579	0.435906
MA0131.2	HINFP	0.329	1	579	0.435906
MA0468.1	DUX4	0.331	1	579	0.437555
MA0693.2	VDR	0.339	1	579	0.447109
MA0122.2	NKX3-2	0.348	1	579	0.457936
MA0779.1	PAX1	0.352	1	579	0.457996
MA0083.3	SRF	0.352	1	579	0.457996
MA0755.1	CUX2	0.352	1	579	0.457996
MA0754.1	CUX1	0.352	1	579	0.457996
MA0715.1	PROP1	0.35	1	579	0.457996
MA0511.2	RUNX2	0.353	1	579	0.458267
MA0752.1	ZNF410	0.36	0.982	569	0.46115
MA1133.1	JUN::JUNB(var.2)	0.357	1	579	0.46115
MA0744.1	SCRT2	0.358	1	579	0.46115
MA0692.1	TFEB	0.36	1	579	0.46115
MA0619.1	LIN54	0.36	1	579	0.46115
MA0111.1	Spz1	0.36	1	579	0.46115
MA0856.1	RXRG	0.361	1	579	0.461411
MA0727.1	NR3C2	0.375	1	579	0.474072
MA1103.1	FOXK2	0.372	1	579	0.474072
MA0873.1	HOXD12	0.375	1	579	0.474072
MA0818.1	BHLHE22	0.375	1	579	0.474072
MA0062.2	Gabpa	0.374	1	579	0.474072
MA0852.2	FOXK1	0.377	1	579	0.475562
MA0514.1	Sox3	0.387	1	579	0.487115
MA1136.1	FOSB::JUNB(var.2)	0.39	1	579	0.489826
MA1143.1	FOSL1::JUND(var.2)	0.392	1	579	0.491273
MA0620.2	MITF	0.396	1	579	0.495214
MA0861.1	TP73	0.399	1	579	0.495753
MA0095.2	YY1	0.399	1	579	0.495753
MA0527.1	ZBTB33	0.399	1	579	0.495753
MA0764.1	ETV4	0.401	1	579	0.497171
MA0124.2	Nkx3-1	0.402	1	579	0.497346
MA0844.1	XBP1	0.416	1	579	0.513569
MA1140.1	JUNB(var.2)	0.42	1	579	0.517404
MA0906.1	HOXC12	0.423	1	579	0.519994
MA0144.2	STAT3	0.429	1	579	0.526252
MA0605.1	Atf3	0.436	1	579	0.533708
MA0593.1	FOXP2	0.438	1	579	0.535025
MA0473.2	ELF1	0.442	1	579	0.538775
MA0822.1	HES7	0.452	1	579	0.549807
MA0150.2	Nfe2l2	0.457	1	579	0.554723
MA0461.2	Atoh1	0.46	1	579	0.557197
MA0796.1	TGIF1	0.471	1	579	0.562321
MA1129.1	FOSL1::JUN(var.2)	0.472	1	579	0.562321
MA0464.2	BHLHE40	0.471	1	579	0.562321
MA0768.1	LEF1	0.468	1	579	0.562321
MA0759.1	ELK3	0.471	1	579	0.562321
MA0734.1	GLI2	0.472	1	579	0.562321
MA0137.3	STAT1	0.471	1	579	0.562321
MA0076.2	ELK4	0.471	1	579	0.562321
MA0913.1	Hoxd9	0.474	1	579	0.563544
MA0895.1	HMBOX1	0.478	1	579	0.567135
MA0526.2	USF2	0.484	1	579	0.570745
MA1099.1	Hes1	0.483	1	579	0.570745
MA0093.2	USF1	0.484	1	579	0.570745
MA0761.1	ETV1	0.498	1	579	0.586061
MA0113.3	NR3C1	0.503	1	579	0.588339
MA0509.1	Rfx1	0.504	1	579	0.588339
MA0519.1	Stat5a::Stat5b	0.504	1	579	0.588339
MA0078.1	Sox17	0.504	1	579	0.588339
MA0028.2	ELK1	0.522	1	579	0.60795
MA0776.1	MYBL1	0.524	1	579	0.60795
MA0669.1	NEUROG2	0.525	1	579	0.60795
MA0108.2	TBP	0.524	1	579	0.60795
MA0622.1	Mlxip	0.534	1	579	0.617138
MA0829.1	Srebf1(var.2)	0.554	1	579	0.638976
MA0859.1	Rarg	0.56	1	579	0.644223
MA0496.2	MAFK	0.563	1	579	0.644223
MA0602.1	Arid5a	0.563	1	579	0.644223
MA0501.1	MAF::NFE2	0.562	1	579	0.644223
MA0156.2	FEV	0.565	1	579	0.645237
MA0828.1	SREBF2(var.2)	0.567	1	579	0.646246
MA0646.1	GCM1	0.572	1	579	0.650664
MA1106.1	HIF1A	0.576	1	579	0.65265
MA0770.1	HSF2	0.575	1	579	0.65265
MA0748.1	YY2	0.578	1	579	0.653637
MA0617.1	Id2	0.581	1	579	0.655749
MA0629.1	Rhox11	0.617	1	579	0.695025
MA0884.1	DUXA	0.629	1	579	0.706919
MA0835.1	BATF3	0.63	1	579	0.706919
MA0638.1	CREB3	0.634	1	579	0.710031
MA0771.1	HSF4	0.639	1	579	0.714249
MA0663.1	MLX	0.642	1	579	0.71622
MA0486.2	HSF1	0.671	1	579	0.747133
MA0147.3	MYC	0.673	1	579	0.747921
MA0728.1	Nr2f6(var.2)	0.682	1	579	0.756471
MA0091.1	TAL1::TCF3	0.686	1	579	0.759453
MA0007.3	Ar	0.698	1	579	0.771263
MA0506.1	NRF1	0.705	1	579	0.777514
MA0870.1	Sox1	0.72	1	579	0.788053
MA0865.1	E2F8	0.716	1	579	0.788053
MA0819.1	CLOCK	0.72	1	579	0.788053
MA0259.1	ARNT::HIF1A	0.718	1	579	0.788053
MA0871.1	TFEC	0.723	1	579	0.788356
MA0851.1	Foxj3	0.722	1	579	0.788356
MA0834.1	ATF7	0.731	1	579	0.795581
MA0765.1	ETV5	0.741	1	579	0.801942
MA0763.1	ETV3	0.741	1	579	0.801942
MA0664.1	MLXIPL	0.741	1	579	0.801942
MA0649.1	HEY2	0.745	1	579	0.804767
MA0025.1	NFIL3	0.747	1	579	0.805425
MA0686.1	SPDEF	0.754	1	579	0.811461
MA0151.1	Arid3a	0.76	1	579	0.816401
MA1108.1	MXI1	0.773	1	579	0.828828
MA0839.1	CREB3L1	0.777	1	579	0.831577
MA0626.1	Npas2	0.795	1	579	0.849271
MA0494.1	Nr1h3::Rxra	0.797	1	579	0.84984
MA0840.1	Creb5	0.806	1	579	0.854714
MA0656.1	JDP2(var.2)	0.804	1	579	0.854714
MA0041.1	Foxd3	0.805	1	579	0.854714
MA0863.1	MTF1	0.809	1	579	0.856327
MA1418.1	IRF3	0.814	1	579	0.860047
MA0823.1	HEY1	0.834	1	579	0.877975
MA0609.1	Crem	0.834	1	579	0.877975
MA0604.1	Atf1	0.866	1	579	0.908359
MA0497.1	MEF2C	0.865	1	579	0.908359
MA0105.4	NFKB1	0.87	1	579	0.910904
MA0052.3	MEF2A	0.878	1	579	0.917621
MA0777.1	MYBL2	0.886	1	579	0.924314
MA1122.1	TFDP1	0.893	1	579	0.929941
MA0058.3	MAX	0.903	1	579	0.936984
MA0088.2	ZNF143	0.903	1	579	0.936984
MA0660.1	MEF2B	0.907	1	579	0.939451
MA0825.1	MNT	0.915	1	579	0.946045
MA0773.1	MEF2D	0.92	1	579	0.949519
MA0059.1	MAX::MYC	0.966	1	579	0.995221
MA0632.1	Tcfl5	0.968	1	579	0.99551
MA0470.1	E2F4	0.974	1	579	0.999904
MA0869.1	Sox11	1	1	579	1
MA0867.1	SOX4	1	1	579	1
MA0735.1	GLIS1	1	1	579	1
MA0731.1	BCL6B	1	1	579	1
MA0729.1	RARA	1	1	579	1
MA0868.1	SOX8	1	1	579	1
MA0866.1	SOX21	1	1	579	1
MA0864.1	E2F2	1	1	579	1
MA0525.2	TP63	1	1	579	1
MA0860.1	Rarg(var.2)	1	1	579	1
MA0857.1	Rarb	1	1	579	1
MA0781.1	PAX9	1	1	579	1
MA0758.1	E2F7	1	1	579	1
MA0749.1	ZBED1	1	1	579	1
MA0112.3	ESR1	1	1	579	1

## Sheet: Cluster4
		id	name	p-value	adj_p.value	evalue	padj
		MA0136.2	ELF5	2.78e-07	0.00133	0.768	0.000159572
		MA0081.1	SPIB	1.31e-05	0.0813	47.1	0.0037597
		MA0598.2	EHF	7.27e-05	0.0912	52.8	0.0139099
		MA1117.1	RELB	0.000123	0.232	134	0.0176505
		MA0640.1	ELF3	0.000192	0.108	62.4	0.018368
		MA0052.3	MEF2A	0.000177	0.112	65.1	0.018368
		MA1138.1	FOSL2::JUNB	0.000288	0.254	147	0.023616
		MA0660.1	MEF2B	0.000673	0.207	120	0.0296184
		MA0843.1	TEF	0.000815	0.234	135	0.0296184
		MA0655.1	JDP2	0.0012	0.35	203	0.0296184
		MA0773.1	MEF2D	0.00125	0.389	225	0.0296184
		MA1421.1	TCF7L1	0.00122	0.419	243	0.0296184
		MA1130.1	FOSL2::JUN	0.000535	0.484	280	0.0296184
		MA1144.1	FOSL2::JUND	0.000712	0.51	295	0.0296184
		MA1135.1	FOSB::JUNB	0.000766	0.549	318	0.0296184
		MA0099.3	FOS::JUN	0.000828	0.655	379	0.0296184
		MA0476.1	FOS	0.00123	0.677	392	0.0296184
		MA0766.1	GATA5	0.000489	0.724	419	0.0296184
		MA0753.1	ZNF740	0.000724	0.807	467	0.0296184
		MA0037.3	GATA3	0.00114	0.892	517	0.0296184
		MA0521.1	Tcf12	0.00117	0.947	548	0.0296184
		MA0645.1	ETV6	0.00111	0.974	564	0.0296184
		MA0057.1	MZF1(var.2)	0.00105	0.989	573	0.0296184
		MA0850.1	FOXP3	0.00129	0.996	577	0.0296184
		MA0056.1	MZF1	0.00117	1	579	0.0296184
		MA0641.1	ELF4	0.00144	0.78	451	0.0317908
		MA1137.1	FOSL1::JUNB	0.0015	0.958	555	0.0318889
		MA1104.1	GATA6	0.00165	0.954	552	0.032718
		MA0500.1	Myog	0.00171	0.991	574	0.032718
		MA0847.1	FOXD2	0.00171	0.999	579	0.032718
		MA0160.1	NR4A2	0.00188	0.997	577	0.0348103
		MA0490.1	JUNB	0.00214	0.837	484	0.0383862
		MA0489.1	JUN(var.2)	0.00245	0.853	494	0.0420371
		MA1134.1	FOS::JUNB	0.00249	0.878	508	0.0420371
		MA0497.1	MEF2C	0.00258	0.993	575	0.042312
		MA1128.1	FOSL1::JUN	0.00273	0.954	552	0.0431276
		MA0514.1	Sox3	0.00278	1	579	0.0431276
		MA1141.1	FOS::JUND	0.00311	0.943	546	0.046781
		MA0513.1	SMAD2::SMAD3::SMAD4	0.00321	0.966	559	0.046781
		MA0618.1	LBX1	0.00326	0.997	577	0.046781
		MA0520.1	Stat6	0.0034	0.987	571	0.0476
		MA1142.1	FOSL1::JUND	0.0035	1	579	0.0478333
		MA0482.1	Gata4	0.00377	0.976	565	0.0491814
		MA0467.1	Crx	0.00372	0.985	571	0.0491814
		MA0691.1	TFAP4	0.00402	0.948	549	0.0512773
		MA0724.1	VENTX	0.00444	0.999	579	0.0520114
		MA0031.1	FOXD1	0.00434	1	579	0.0520114
		MA0481.2	FOXP1	0.00437	1	579	0.0520114
		MA0033.2	FOXL1	0.00444	1	579	0.0520114
		MA0154.3	EBF1	0.00484	0.822	476	0.053826
		MA0816.1	Ascl2	0.00493	1	579	0.053826
		MA0852.2	FOXK1	0.00497	1	579	0.053826
		MA0498.2	MEIS1	0.00486	1	579	0.053826
		MA0036.3	GATA2	0.00558	1	579	0.0593133
		MA0103.3	ZEB1	0.00571	1	579	0.0595916
		MA0477.1	FOSL1	0.0059	0.989	573	0.0596154
		MA0848.1	FOXO4	0.00592	1	579	0.0596154
		MA0528.1	ZNF263	0.00605	1	579	0.0598741
		MA1110.1	NR1H4	0.00657	1	579	0.0618226
		MA0090.2	TEAD1	0.00636	1	579	0.0618226
		MA0914.1	ISL2	0.00647	1	579	0.0618226
		MA0002.2	RUNX1	0.00686	1	579	0.0635103
		MA0488.1	JUN	0.00719	0.989	573	0.0641997
		MA0515.1	Sox6	0.00723	1	579	0.0641997
		MA1103.1	FOXK2	0.00727	1	579	0.0641997
		MA0478.1	FOSL2	0.00802	0.997	577	0.0687087
		MA0071.1	RORA	0.00797	1	579	0.0687087
		MA0473.2	ELF1	0.00834	1	579	0.0703994
		MA0593.1	FOXP2	0.00849	1	579	0.070627
		MA0484.1	HNF4G	0.00901	1	579	0.073882
		MA0762.1	ETV2	0.00946	1	579	0.0764794
		MA0258.2	ESR2	0.00964	0.999	579	0.0768522
		MA0639.1	DBP	0.0101	0.982	569	0.0770368
		MA0139.1	CTCF	0.0101	0.989	573	0.0770368
		MA0102.3	CEBPA	0.0102	1	579	0.0770368
		MA1109.1	NEUROD1	0.01	1	579	0.0770368
		MA0462.1	BATF::JUN	0.0107	1	579	0.0797636
		MA0007.3	Ar	0.0117	0.578	335	0.0813167
		MA1146.1	NR1A4::RXRA	0.0117	0.96	556	0.0813167
		MA0509.1	Rfx1	0.0117	1	579	0.0813167
		MA0465.1	CDX2	0.0114	1	579	0.0813167
		MA0739.1	Hic1	0.0117	1	579	0.0813167
		MA0901.1	HOXB13	0.0119	1	579	0.0813167
		MA0499.1	Myod1	0.0119	1	579	0.0813167
		MA0158.1	HOXA5	0.0122	1	579	0.0823859
		MA0687.1	SPIC	0.0128	1	579	0.0838427
		MA0712.1	OTX2	0.013	1	579	0.0838427
		MA0101.1	REL	0.013	1	579	0.0838427
		MA0076.2	ELK4	0.0128	1	579	0.0838427
		MA0491.1	JUND	0.0133	1	579	0.0838923
		MA0597.1	THAP1	0.0133	1	579	0.0838923
		MA0774.1	MEIS2	0.0136	1	579	0.0848522
		MA0778.1	NFKB2	0.0138	0.992	574	0.0851742
		MA0145.3	TFCP2	0.0141	1	579	0.0861
		MA0736.1	GLIS2	0.0163	0.985	570	0.0879431
		MA0836.1	CEBPD	0.0163	1	579	0.0879431
		MA1105.1	GRHL2	0.015	1	579	0.0879431
		MA0684.1	RUNX3	0.0155	1	579	0.0879431
		MA0837.1	CEBPE	0.0163	1	579	0.0879431
		MA0017.2	NR2F1	0.0156	1	579	0.0879431
		MA0815.1	TFAP2C(var.3)	0.0158	1	579	0.0879431
		MA1102.1	CTCFL	0.0158	1	579	0.0879431
		MA0892.1	GSX1	0.0165	1	579	0.0879431
		MA0522.2	TCF3	0.0163	1	579	0.0879431
		MA0809.1	TEAD4	0.0153	1	579	0.0879431
		MA0098.3	ETS1	0.0167	1	579	0.0879431
		MA0474.2	ERG	0.0162	1	579	0.0879431
		MA0062.2	Gabpa	0.0166	1	579	0.0879431
		MA0067.1	Pax2	0.0167	1	579	0.0879431
		MA0600.2	RFX2	0.019	0.993	575	0.0879516
		MA0798.1	RFX3	0.019	1	579	0.0879516
		MA0686.1	SPDEF	0.0175	1	579	0.0879516
		MA0043.2	HLF	0.0171	1	579	0.0879516
		MA0872.1	TFAP2A(var.3)	0.0182	1	579	0.0879516
		MA0672.1	NKX2-3	0.0185	1	579	0.0879516
		MA1152.1	SOX15	0.0186	1	579	0.0879516
		MA0032.2	FOXC1	0.0185	1	579	0.0879516
		MA0806.1	TBX4	0.0182	1	579	0.0879516
		MA0719.1	RHOXF1	0.0181	1	579	0.0879516
		MA0714.1	PITX3	0.019	1	579	0.0879516
		MA0122.2	NKX3-2	0.0185	1	579	0.0879516
		MA0706.1	MEOX2	0.0186	1	579	0.0879516
		MA0673.1	NKX2-8	0.0174	1	579	0.0879516
		MA0480.1	Foxo1	0.0174	1	579	0.0879516
		MA0107.1	RELA	0.0199	1	579	0.0913808
		MA0157.2	FOXO3	0.0205	1	579	0.0919297
		MA0750.2	ZBTB7A	0.0205	1	579	0.0919297
		MA0612.1	EMX1	0.0205	1	579	0.0919297
		MA0840.1	Creb5	0.0207	1	579	0.092107
		MA0775.1	MEIS3	0.0217	1	579	0.0950824
		MA0042.2	FOXI1	0.0217	1	579	0.0950824
		MA0466.2	CEBPB	0.0221	1	579	0.0961015
		MA0596.1	SREBF2	0.023	1	579	0.0992632
		MA0613.1	FOXG1	0.0236	1	579	0.101093
		MA0523.1	TCF7L2	0.0241	1	579	0.10247
		MA0048.2	NHLH1	0.0244	1	579	0.102982
		MA0682.1	Pitx1	0.0248	1	579	0.103907
		MA0663.1	MLX	0.0251	1	579	0.104401
		MA0468.1	DUX4	0.0276	1	579	0.106325
		MA0142.1	Pou5f1::Sox2	0.0274	1	579	0.106325
		MA0030.1	FOXF2	0.0265	1	579	0.106325
		MA1132.1	JUN::JUNB	0.0275	1	579	0.106325
		MA1115.1	POU5F1	0.0276	1	579	0.106325
		MA0909.1	HOXD13	0.0274	1	579	0.106325
		MA0093.2	USF1	0.0276	1	579	0.106325
		MA0148.3	FOXA1	0.0276	1	579	0.106325
		MA0503.1	Nkx2-5(var.2)	0.0272	1	579	0.106325
		MA0084.1	SRY	0.0276	1	579	0.106325
		MA0063.1	Nkx2-5	0.0276	1	579	0.106325
		MA0130.1	ZNF354C	0.0282	1	579	0.107912
		MA0797.1	TGIF2	0.0291	0.975	565	0.109548
		MA0135.1	Lhx3	0.0292	1	579	0.109548
		MA0895.1	HMBOX1	0.029	1	579	0.109548
		MA0650.1	HOXA13	0.0295	1	579	0.109955
		MA0078.1	Sox17	0.0299	1	579	0.110726
		MA0913.1	Hoxd9	0.0302	1	579	0.111121
		MA0035.3	Gata1	0.031	1	579	0.113338
		MA0705.1	Lhx8	0.0316	1	579	0.1148
		MA1121.1	TEAD2	0.032	1	579	0.115522
		MA0028.2	ELK1	0.0329	1	579	0.116572
		MA0764.1	ETV4	0.0326	1	579	0.116572
		MA0701.1	LHX9	0.0328	1	579	0.116572
		MA1118.1	SIX1	0.0332	1	579	0.116913
		MA0594.1	Hoxa9	0.0343	1	579	0.119322
		MA0595.1	SREBF1	0.0342	1	579	0.119322
		MA1151.1	RORC	0.0351	1	579	0.120643
		MA0871.1	TFEC	0.035	1	579	0.120643
		MA0113.3	NR3C1	0.0375	0.748	433	0.120893
		MA0159.1	RARA::RXRA	0.0369	1	579	0.120893
		MA0647.1	GRHL1	0.0375	1	579	0.120893
		MA0070.1	PBX1	0.0376	1	579	0.120893
		MA0799.1	RFX4	0.0375	1	579	0.120893
		MA1101.1	BACH2	0.0376	1	579	0.120893
		MA0849.1	FOXO6	0.0373	1	579	0.120893
		MA0058.3	MAX	0.0377	1	579	0.120893
		MA0156.2	FEV	0.0361	1	579	0.120893
		MA0688.1	TBX2	0.0375	1	579	0.120893
		MA0506.1	NRF1	0.0375	1	579	0.120893
		MA0109.1	HLTF	0.0371	1	579	0.120893
		MA0661.1	MEOX1	0.0383	1	579	0.122134
		MA0025.1	NFIL3	0.039	1	579	0.123631
		MA1119.1	SIX2	0.0392	1	579	0.123631
		MA0813.1	TFAP2B(var.3)	0.0397	1	579	0.123798
		MA0807.1	TBX5	0.0395	1	579	0.123798
		MA0087.1	Sox5	0.0399	1	579	0.123798
		MA0903.1	HOXB3	0.0407	1	579	0.125601
		MA0140.2	GATA1::TAL1	0.0412	1	579	0.125791
		MA0041.1	Foxd3	0.0411	1	579	0.125791
		MA0492.1	JUND(var.2)	0.042	1	579	0.126884
		MA0723.1	VAX2	0.0419	1	579	0.126884
		MA0869.1	Sox11	0.0457	0.0457	26.4	0.1271
		MA0866.1	SOX21	0.0457	0.569	329	0.1271
		MA0822.1	HES7	0.045	0.868	503	0.1271
		MA0783.1	PKNOX2	0.046	0.868	503	0.1271
		MA0727.1	NR3C2	0.0457	0.903	523	0.1271
		MA0116.1	Znf423	0.046	0.995	576	0.1271
		MA0768.1	LEF1	0.0453	1	579	0.1271
		MA0838.1	CEBPG	0.0463	1	579	0.1271
		MA1149.1	RARA::RXRG	0.0456	1	579	0.1271
		MA1150.1	RORB	0.0429	1	579	0.1271
		MA0902.1	HOXB2	0.0437	1	579	0.1271
		MA0891.1	GSC2	0.0446	1	579	0.1271
		MA0862.1	GMEB2	0.0463	1	579	0.1271
		MA0763.1	ETV3	0.0465	1	579	0.1271
		MA0760.1	ERF	0.0457	1	579	0.1271
		MA0068.2	PAX4	0.0463	1	579	0.1271
		MA0662.1	MIXL1	0.0458	1	579	0.1271
		MA0131.2	HINFP	0.0451	1	579	0.1271
		MA0624.1	NFATC1	0.0465	1	579	0.1271
		MA0006.1	Ahr::Arnt	0.0457	1	579	0.1271
		MA0029.1	Mecom	0.0468	0.999	578	0.127255
		MA0059.1	MAX::MYC	0.047	1	579	0.127255
		MA0893.1	GSX2	0.0473	1	579	0.127466
		MA0610.1	DMRT3	0.0484	1	579	0.129821
		MA0642.1	EN2	0.0488	1	579	0.130285
		MA0900.1	HOXA2	0.0497	1	579	0.132073
		MA0771.1	HSF4	0.0501	1	579	0.132523
		MA0759.1	ELK3	0.0508	1	579	0.1335
		MA0754.1	CUX1	0.051	1	579	0.1335
		MA0027.2	EN1	0.0514	1	579	0.1335
		MA0108.2	TBP	0.0512	1	579	0.1335
		MA0619.1	LIN54	0.0532	1	579	0.137553
		MA0875.1	BARX1	0.0547	1	579	0.140797
		MA0700.1	LHX2	0.0562	1	579	0.144012
		MA0699.1	LBX2	0.0568	1	579	0.144262
		MA0674.1	NKX6-1	0.0568	1	579	0.144262
		MA0780.1	PAX3	0.0574	1	579	0.145144
		MA0814.1	TFAP2C(var.2)	0.0582	1	579	0.146521
		MA0782.1	PKNOX1	0.0606	0.947	548	0.149933
		MA0105.4	NFKB1	0.0605	0.982	568	0.149933
		MA0510.2	RFX5	0.0605	1	579	0.149933
		MA0485.1	Hoxc9	0.0605	1	579	0.149933
		MA0877.1	Barhl1	0.0613	1	579	0.151014
		MA0511.2	RUNX2	0.0618	1	579	0.151194
		MA0765.1	ETV5	0.0619	1	579	0.151194
		MA0038.1	Gfi1	0.0638	1	579	0.155175
		MA0635.1	BARHL2	0.0642	1	579	0.155489
		MA0878.1	CDX1	0.0669	1	579	0.161347
		MA0629.1	Rhox11	0.0674	1	579	0.161873
		MA0879.1	Dlx1	0.0683	1	579	0.162673
		MA0601.1	Arid3b	0.0682	1	579	0.162673
		MA0716.1	PRRX1	0.0687	1	579	0.16295
		MA0143.3	Sox2	0.0692	1	579	0.16346
		MA0152.1	NFATC2	0.0697	1	579	0.163966
		MA0851.1	Foxj3	0.0703	1	579	0.164703
		MA0865.1	E2F8	0.0766	1	579	0.164704
		MA0841.1	NFE2	0.0753	1	579	0.164704
		MA0757.1	ONECUT3	0.0767	1	579	0.164704
		MA0636.1	BHLHE41	0.0734	1	579	0.164704
		MA0769.1	Tcf7	0.0737	1	579	0.164704
		MA1139.1	FOSL2::JUNB(var.2)	0.0769	1	579	0.164704
		MA1113.1	PBX2	0.0734	1	579	0.164704
		MA0908.1	HOXD11	0.0748	1	579	0.164704
		MA0899.1	HOXA10	0.075	1	579	0.164704
		MA0888.1	EVX2	0.076	1	579	0.164704
		MA0884.1	DUXA	0.0734	1	579	0.164704
		MA0003.3	TFAP2A	0.0712	1	579	0.164704
		MA0761.1	ETV1	0.0749	1	579	0.164704
		MA0745.1	SNAI2	0.0764	1	579	0.164704
		MA0715.1	PROP1	0.0714	1	579	0.164704
		MA0675.1	NKX6-2	0.0714	1	579	0.164704
		MA0648.1	GSC	0.0766	1	579	0.164704
		MA0643.1	Esrrg	0.0745	1	579	0.164704
		MA0614.1	Foxj2	0.0751	1	579	0.164704
		MA0095.2	YY1	0.0767	1	579	0.164704
		MA0505.1	Nr5a2	0.0723	1	579	0.164704
		MA0146.2	Zfx	0.0727	1	579	0.164704
		MA0089.1	MAFG::NFE2L1	0.0757	1	579	0.164704
		MA0886.1	EMX2	0.0777	1	579	0.165799
		MA0617.1	Id2	0.0787	1	579	0.16731
		MA1153.1	Smad4	0.079	1	579	0.167328
		MA0692.1	TFEB	0.0797	1	579	0.16819
		MA0141.3	ESRRB	0.0803	1	579	0.168234
		MA1120.1	SOX13	0.0804	1	579	0.168234
		MA0077.1	SOX9	0.0806	1	579	0.168234
		MA0711.1	OTX1	0.0812	1	579	0.168872
		MA0800.1	EOMES	0.0816	1	579	0.168896
		MA0463.1	Bcl6	0.0818	1	579	0.168896
		MA0080.4	SPI1	0.0864	1	579	0.172393
		MA0831.2	TFE3	0.0888	1	579	0.172393
		MA0508.2	PRDM1	0.0871	1	579	0.172393
		MA1106.1	HIF1A	0.0892	1	579	0.172393
		MA0889.1	GBX1	0.0892	1	579	0.172393
		MA0887.1	EVX1	0.0881	1	579	0.172393
		MA0883.1	Dmbx1	0.0895	1	579	0.172393
		MA0117.2	Mafb	0.0866	1	579	0.172393
		MA0825.1	MNT	0.0852	1	579	0.172393
		MA0824.1	ID4	0.0877	1	579	0.172393
		MA0820.1	FIGLA	0.085	1	579	0.172393
		MA0819.1	CLOCK	0.0892	1	579	0.172393
		MA0792.1	POU5F1B	0.0866	1	579	0.172393
		MA0789.1	POU3F4	0.0892	1	579	0.172393
		MA0704.1	Lhx4	0.0868	1	579	0.172393
		MA0667.1	MYF6	0.0864	1	579	0.172393
		MA0634.1	ALX3	0.0876	1	579	0.172393
		MA0518.1	Stat4	0.0895	1	579	0.172393
		MA0155.1	INSM1	0.0854	1	579	0.172393
		MA0125.1	Nobox	0.0892	1	579	0.172393
		MA0679.1	ONECUT1	0.0941	1	579	0.178997
		MA0846.1	FOXC2	0.0946	1	579	0.178997
		MA0124.2	Nkx3-1	0.0944	1	579	0.178997
		MA0689.1	TBX20	0.0944	1	579	0.178997
		MA0630.1	SHOX	0.0948	1	579	0.178997
		MA0047.2	Foxa2	0.0942	1	579	0.178997
		MA0703.1	LMX1B	0.0953	1	579	0.179351
		MA0649.1	HEY2	0.0978	1	579	0.183455
		MA1125.1	ZNF384	0.0984	1	579	0.183979
		MA0756.1	ONECUT2	0.0994	1	579	0.184044
		MA0494.1	Nr1h3::Rxra	0.101	1	579	0.184044
		MA1136.1	FOSB::JUNB(var.2)	0.0999	1	579	0.184044
		MA0808.1	TEAD3	0.101	1	579	0.184044
		MA0710.1	NOTO	0.0993	1	579	0.184044
		MA0475.2	FLI1	0.101	1	579	0.184044
		MA0606.1	NFAT5	0.0995	1	579	0.184044
		MA0092.1	Hand1::Tcf3	0.101	1	579	0.184044
		MA0119.1	NFIC::TLX1	0.102	1	579	0.184694
		MA0722.1	VAX1	0.102	1	579	0.184694
		MA0737.1	GLIS3	0.104	0.973	563	0.187135
		MA0472.2	EGR2	0.104	1	579	0.187135
		MA0014.3	PAX5	0.105	1	579	0.187757
		MA0708.1	MSX2	0.105	1	579	0.187757
		MA0486.2	HSF1	0.106	1	579	0.188957
		MA0882.1	DLX6	0.109	1	579	0.192511
		MA0812.1	TFAP2B(var.2)	0.109	1	579	0.192511
		MA0801.1	MGA	0.109	1	579	0.192511
		MA0890.1	GBX2	0.111	1	579	0.19425
		MA0616.1	Hes2	0.111	1	579	0.19425
		MA0603.1	Arntl	0.111	1	579	0.19425
		MA0138.2	REST	0.116	0.96	556	0.199353
		MA0696.1	ZIC1	0.116	1	579	0.199353
		MA0442.2	SOX10	0.115	1	579	0.199353
		MA1116.1	RBPJ	0.115	1	579	0.199353
		MA0707.1	MNX1	0.116	1	579	0.199353
		MA0676.1	Nr2e1	0.116	1	579	0.199353
		MA0658.1	LHX6	0.118	1	579	0.202185
		MA0602.1	Arid5a	0.119	1	579	0.203292
		MA0681.1	Phox2b	0.122	1	579	0.207798
		MA0796.1	TGIF1	0.123	0.975	565	0.208882
		MA0615.1	Gmeb1	0.124	1	579	0.209959
		MA0770.1	HSF2	0.131	1	579	0.214034
		MA0894.1	HESX1	0.128	1	579	0.214034
		MA0876.1	BSX	0.129	1	579	0.214034
		MA0830.1	TCF4	0.129	1	579	0.214034
		MA0829.1	Srebf1(var.2)	0.131	1	579	0.214034
		MA0828.1	SREBF2(var.2)	0.131	1	579	0.214034
		MA0788.1	POU3F3	0.132	1	579	0.214034
		MA0738.1	HIC2	0.13	1	579	0.214034
		MA0717.1	RAX2	0.132	1	579	0.214034
		MA0075.2	Prrx2	0.132	1	579	0.214034
		MA0670.1	NFIA	0.131	1	579	0.214034
		MA0646.1	GCM1	0.131	1	579	0.214034
		MA0611.1	Dux	0.131	1	579	0.214034
		MA0151.1	Arid3a	0.132	1	579	0.214034
		MA0091.1	TAL1::TCF3	0.131	1	579	0.214034
		MA0592.2	Esrra	0.135	1	579	0.218282
		MA0019.1	Ddit3::Cebpa	0.136	1	579	0.219281
		MA1112.1	NR4A1	0.138	1	579	0.221882
		MA0874.1	Arx	0.139	1	579	0.222866
		MA0790.1	POU4F1	0.142	1	579	0.227042
		MA1123.1	TWIST1	0.144	1	579	0.228331
		MA1100.1	ASCL1	0.144	1	579	0.228331
		MA0904.1	Hoxb5	0.144	1	579	0.228331
		MA0680.1	PAX7	0.145	1	579	0.228654
		MA0507.1	POU2F2	0.145	1	579	0.228654
		MA0608.1	Creb3l2	0.146	1	579	0.2296
		MA0464.2	BHLHE40	0.148	1	579	0.232109
		MA0664.1	MLXIPL	0.15	1	579	0.234605
		MA0695.1	ZBTB7C	0.151	1	579	0.235527
		MA1107.1	KLF9	0.152	1	579	0.235805
		MA0785.1	POU2F1	0.152	1	579	0.235805
		MA0721.1	UNCX	0.153	1	579	0.236081
		MA0644.1	ESX1	0.153	1	579	0.236081
		MA0702.1	LMX1A	0.154	1	579	0.236987
		MA0040.1	Foxq1	0.158	1	579	0.242492
		MA0111.1	Spz1	0.16	1	579	0.244907
		MA0730.1	RARA(var.2)	0.164	0.953	551	0.249698
		MA0728.1	Nr2f6(var.2)	0.164	0.997	577	0.249698
		MA0631.1	Six3	0.165	1	579	0.249894
		MA0741.1	KLF16	0.165	1	579	0.249894
		MA0803.1	TBX15	0.166	1	579	0.250747
		MA1129.1	FOSL1::JUN(var.2)	0.171	1	579	0.254945
		MA0881.1	Dlx4	0.17	1	579	0.254945
		MA0726.1	VSX2	0.171	1	579	0.254945
		MA0259.1	ARNT::HIF1A	0.171	1	579	0.254945
		MA0069.1	Pax6	0.171	1	579	0.254945
		MA0709.1	Msx3	0.172	1	579	0.255772
		MA0793.1	POU6F2	0.173	1	579	0.256594
		MA0713.1	PHOX2A	0.174	1	579	0.257412
		MA0842.1	NRL	0.177	1	579	0.261177
		MA0835.1	BATF3	0.181	1	579	0.262359
		MA0693.2	VDR	0.181	1	579	0.262359
		MA1140.1	JUNB(var.2)	0.181	1	579	0.262359
		MA0787.1	POU3F2	0.18	1	579	0.262359
		MA0725.1	VSX1	0.179	1	579	0.262359
		MA0132.2	PDX1	0.18	1	579	0.262359
		MA0164.1	Nr2e3	0.181	1	579	0.262359
		MA0671.1	NFIX	0.182	1	579	0.262482
		MA0625.1	NFATC3	0.182	1	579	0.262482
		MA0524.2	TFAP2C	0.184	1	579	0.264702
		MA0748.1	YY2	0.185	1	579	0.264813
		MA0685.1	SP4	0.185	1	579	0.264813
		MA1145.1	FOSL2::JUND(var.2)	0.186	1	579	0.265582
		MA0666.1	MSX1	0.187	1	579	0.266347
		MA0755.1	CUX2	0.19	1	579	0.26995
		MA0526.2	USF2	0.192	1	579	0.272119
		MA1154.1	ZNF282	0.197	1	579	0.275129
		MA1114.1	PBX3	0.195	1	579	0.275129
		MA0784.1	POU1F1	0.197	1	579	0.275129
		MA0144.2	STAT3	0.197	1	579	0.275129
		MA0493.1	Klf1	0.197	1	579	0.275129
		MA0502.1	NFYB	0.197	1	579	0.275129
		MA0079.3	SP1	0.198	1	579	0.275854
		MA0896.1	Hmx1	0.2	1	579	0.277966
		MA0791.1	POU4F3	0.201	1	579	0.278681
		MA0161.2	NFIC	0.203	1	579	0.280776
		MA0752.1	ZNF410	0.208	0.878	508	0.284267
		MA1147.1	NR4A2::RXRA	0.208	1	579	0.284267
		MA1122.1	TFDP1	0.207	1	579	0.284267
		MA0690.1	TBX21	0.208	1	579	0.284267
		MA0471.1	E2F6	0.208	1	579	0.284267
		MA0805.1	TBX1	0.21	1	579	0.286318
		MA1131.1	FOSL2::JUN(var.2)	0.214	1	579	0.291081
		MA0912.1	Hoxd3	0.215	1	579	0.291749
		MA0786.1	POU3F1	0.223	1	579	0.301892
		MA0628.1	POU6F1	0.226	1	579	0.305233
		MA0880.1	Dlx3	0.227	1	579	0.305864
		MA0720.1	Shox2	0.228	1	579	0.306492
		MA0163.1	PLAG1	0.229	1	579	0.307117
		MA0802.1	TBR1	0.23	1	579	0.307739
		MA1108.1	MXI1	0.231	1	579	0.308358
		MA0823.1	HEY1	0.233	1	579	0.310306
		MA0637.1	CENPB	0.235	1	579	0.312245
		MA1126.1	FOS::JUN(var.2)	0.239	1	579	0.316827
		MA0665.1	MSC	0.243	1	579	0.321387
		MA0074.1	RXRA::VDR	0.245	1	579	0.321808
		MA0767.1	GCM2	0.245	1	579	0.321808
		MA0501.1	MAF::NFE2	0.245	1	579	0.321808
		MA1111.1	NR2F2	0.247	1	579	0.323694
		MA0861.1	TP73	0.249	1	579	0.324661
		MA0104.4	MYCN	0.249	1	579	0.324661
		MA0620.2	MITF	0.25	1	579	0.324661
		MA0845.1	FOXB1	0.25	1	579	0.324661
		MA0100.3	MYB	0.252	1	579	0.326519
		MA0885.1	Dlx2	0.255	1	579	0.329662
		MA0811.1	TFAP2B	0.256	1	579	0.330211
		MA0626.1	Npas2	0.257	1	579	0.330562
		MA0622.1	Mlxip	0.258	1	579	0.330562
		MA0050.2	IRF1	0.258	1	579	0.330562
		MA0072.1	RORA(var.2)	0.266	1	579	0.339298
		MA1143.1	FOSL1::JUND(var.2)	0.266	1	579	0.339298
		MA0654.1	ISX	0.267	1	579	0.339818
		MA0479.1	FOXH1	0.272	1	579	0.345416
		MA0694.1	ZBTB7B	0.273	1	579	0.345921
		MA0516.1	SP2	0.274	1	579	0.346423
		MA0897.1	Hmx2	0.275	1	579	0.346923
		MA0758.1	E2F7	0.279	0.99	573	0.348902
		MA0870.1	Sox1	0.279	0.999	579	0.348902
		MA0747.1	SP8	0.279	1	579	0.348902
		MA0734.1	GLI2	0.279	1	579	0.348902
		MA0018.3	CREB1	0.282	1	579	0.351887
		MA0742.1	Klf12	0.284	1	579	0.353614
		MA0656.1	JDP2(var.2)	0.285	1	579	0.354091
		MA0669.1	NEUROG2	0.291	1	579	0.360765
		MA0607.1	Bhlha15	0.293	1	579	0.362461
		MA0833.1	ATF4	0.298	1	579	0.367854
		MA0659.1	MAFG	0.3	1	579	0.369528
		MA0907.1	HOXC13	0.301	1	579	0.369966
		MA0810.1	TFAP2A(var.2)	0.305	1	579	0.374081
		MA0051.1	IRF2	0.312	1	579	0.381851
		MA0817.1	BHLHE23	0.313	1	579	0.38226
		MA0905.1	HOXC10	0.314	1	579	0.382667
		MA0150.2	Nfe2l2	0.315	1	579	0.383072
		MA0633.1	Twist2	0.316	1	579	0.383476
		MA0106.3	TP53	0.317	1	579	0.383878
		MA0627.1	Pou2f3	0.318	1	579	0.384278
		MA0718.1	RAX	0.319	1	579	0.384676
		MA0073.1	RREB1	0.323	1	579	0.388683
		MA0621.1	mix-a	0.333	1	579	0.399879
		MA1418.1	IRF3	0.334	1	579	0.400242
		MA0839.1	CREB3L1	0.345	1	579	0.412562
		MA0772.1	IRF7	0.347	1	579	0.414091
		MA0854.1	Alx1	0.351	1	579	0.41713
		MA0609.1	Crem	0.351	1	579	0.41713
		MA0853.1	Alx4	0.353	1	579	0.41864
		MA0605.1	Atf3	0.355	1	579	0.420144
		MA0147.3	MYC	0.357	1	579	0.421642
		MA1133.1	JUN::JUNB(var.2)	0.362	1	579	0.426669
		MA0483.1	Gfi1b	0.366	1	579	0.4305
		MA0844.1	XBP1	0.373	1	579	0.436053
		MA0698.1	ZBTB18	0.373	1	579	0.436053
		MA0599.1	KLF5	0.373	1	579	0.436053
		MA0795.1	SMAD3	0.376	1	579	0.438667
		MA0898.1	Hmx3	0.384	1	579	0.446186
		MA0604.1	Atf1	0.384	1	579	0.446186
		MA1127.1	FOSB::JUN	0.398	1	579	0.461519
		MA0832.1	Tcf21	0.401	1	579	0.463349
		MA0744.1	SCRT2	0.402	1	579	0.463349
		MA0743.1	SCRT1	0.402	1	579	0.463349
		MA0740.1	KLF14	0.413	1	579	0.475074
		MA0834.1	ATF7	0.421	1	579	0.483308
		MA0060.3	NFYA	0.422	1	579	0.483489
		MA0461.2	Atoh1	0.423	1	579	0.483669
		MA0496.2	MAFK	0.426	1	579	0.486131
		MA0910.1	Hoxd8	0.43	1	579	0.489722
		MA0859.1	Rarg	0.433	1	579	0.491353
		MA0039.3	KLF4	0.434	1	579	0.491353
		MA0519.1	Stat5a::Stat5b	0.434	1	579	0.491353
		MA0751.1	ZIC4	0.453	1	579	0.511854
		MA0779.1	PAX1	0.456	1	579	0.513224
		MA0083.3	SRF	0.456	1	579	0.513224
		MA0732.1	EGR3	0.464	1	579	0.521205
		MA0088.2	ZNF143	0.466	1	579	0.52243
		MA0162.3	EGR1	0.474	1	579	0.530363
		MA0749.1	ZBED1	0.48	1	579	0.533953
		MA0653.1	IRF9	0.48	1	579	0.533953
		MA0591.1	Bach1::Mafk	0.479	1	579	0.533953
		MA0818.1	BHLHE22	0.486	1	579	0.539582
		MA0697.1	ZIC3	0.489	1	579	0.540821
		MA1099.1	Hes1	0.489	1	579	0.540821
		MA0638.1	CREB3	0.494	1	579	0.5453
		MA0623.1	Neurog1	0.511	1	579	0.562983
		MA0911.1	Hoxa11	0.519	1	579	0.56961
		MA0683.1	POU4F2	0.519	1	579	0.56961
		MA0495.2	MAFF	0.527	1	579	0.577286
		MA0873.1	HOXD12	0.532	1	579	0.580548
		MA0746.1	SP3	0.532	1	579	0.580548
		MA0906.1	HOXC12	0.537	1	579	0.583784
		MA0657.1	KLF13	0.537	1	579	0.583784
		MA0677.1	Nr2f6	0.548	1	579	0.594616
		MA0024.3	E2F1	0.551	1	579	0.596743
		MA0517.1	STAT1::STAT2	0.554	1	579	0.598863
		MA0046.2	HNF1A	0.563	1	579	0.606308
		MA0065.2	Pparg::Rxra	0.562	1	579	0.606308
		MA0137.3	STAT1	0.565	1	579	0.607322
		MA0651.1	HOXC11	0.571	1	579	0.612624
		MA0794.1	PROX1	0.584	1	579	0.625403
		MA1419.1	IRF4	0.608	1	579	0.647481
		MA0470.1	E2F4	0.608	1	579	0.647481
		MA0504.1	NR2C2	0.608	1	579	0.647481
		MA0153.2	HNF1B	0.631	1	579	0.67073
		MA0827.1	OLIG3	0.636	1	579	0.674795
		MA0678.1	OLIG2	0.645	1	579	0.68288
		MA0632.1	Tcfl5	0.646	1	579	0.68288
		MA1155.1	ZSCAN4	0.659	1	579	0.695342
		MA0826.1	OLIG1	0.691	1	579	0.727769
		MA0527.1	ZBTB33	0.704	1	579	0.73875
		MA0149.1	EWSR1-FLI1	0.704	1	579	0.73875
		MA0776.1	MYBL1	0.72	1	579	0.754161
		MA0652.1	IRF8	0.723	1	579	0.755923
		MA1420.1	IRF5	0.726	1	579	0.75768
		MA0733.1	EGR4	0.737	1	579	0.767764
		MA0668.1	NEUROD2	0.759	1	579	0.78925
		MA0004.1	Arnt	0.761	1	579	0.789899
		MA0009.2	T	0.776	1	579	0.804014
		MA0777.1	MYBL2	0.804	1	579	0.831524
		MA1148.1	PPARA::RXRA	0.811	1	579	0.837255
		MA1124.1	ZNF24	0.884	1	579	0.91098
		MA0512.2	Rxra	0.898	1	579	0.923749
		MA0855.1	RXRB	0.904	1	579	0.928258
		MA0864.1	E2F2	1	1	579	1
		MA0863.1	MTF1	1	1	579	1
		MA0860.1	Rarg(var.2)	1	1	579	1
		MA0858.1	Rarb(var.2)	1	1	579	1
		MA0856.1	RXRG	1	1	579	1
		MA0821.1	HES5	1	1	579	1
		MA0804.1	TBX19	1	1	579	1
		MA0781.1	PAX9	1	1	579	1
		MA0469.2	E2F3	1	1	579	1
		MA0114.3	Hnf4a	1	1	579	1
		MA0066.1	PPARG	1	1	579	1
		MA0867.1	SOX4	1	1	579	1
		MA0735.1	GLIS1	1	1	579	1
		MA0731.1	BCL6B	1	1	579	1
		MA0729.1	RARA	1	1	579	1

## Sheet: Cluster8
id	name	p-value	adj_p.value	evalue	padj
MA0159.1	RARA::RXRA	0.00189	0.435	252	0.122748
MA1150.1	RORB	0.000438	0.552	320	0.122748
MA0080.4	SPI1	0.00711	0.628	363	0.122748
MA1151.1	RORC	0.000887	0.757	438	0.122748
MA0465.1	CDX2	0.00208	0.902	522	0.122748
MA0623.1	Neurog1	0.00117	0.93	538	0.122748
MA0498.2	MEIS1	0.000729	0.931	539	0.122748
MA1124.1	ZNF24	0.00634	0.952	551	0.122748
MA0736.1	GLIS2	0.0126	0.953	552	0.122748
MA0896.1	Hmx1	0.00588	0.964	558	0.122748
MA0800.1	EOMES	0.00428	0.977	565	0.122748
MA0518.1	Stat4	0.00202	0.981	568	0.122748
MA1110.1	NR1H4	0.0038	0.993	575	0.122748
MA0142.1	Pou5f1::Sox2	0.00711	0.995	576	0.122748
MA0613.1	FOXG1	0.00806	0.997	577	0.122748
MA0047.2	Foxa2	0.00342	0.998	578	0.122748
MA0483.1	Gfi1b	0.00384	0.998	578	0.122748
MA0520.1	Stat6	0.00542	0.999	579	0.122748
MA0117.2	Mafb	0.00508	0.999	579	0.122748
MA0766.1	GATA5	0.00292	1	579	0.122748
MA0911.1	Hoxa11	0.00654	1	579	0.122748
MA0687.1	SPIC	0.00633	1	579	0.122748
MA0143.3	Sox2	0.00992	1	579	0.122748
MA1107.1	KLF9	0.004	1	579	0.122748
MA0258.2	ESR2	0.0145	1	579	0.122748
MA1104.1	GATA6	0.00577	1	579	0.122748
MA0814.1	TFAP2C(var.2)	0.00413	1	579	0.122748
MA0785.1	POU2F1	0.00609	1	579	0.122748
MA0674.1	NKX6-1	0.00451	1	579	0.122748
MA0482.1	Gata4	0.0134	1	579	0.122748
MA0787.1	POU3F2	0.0102	1	579	0.122748
MA0774.1	MEIS2	0.00685	1	579	0.122748
MA1113.1	PBX2	0.0109	1	579	0.122748
MA0513.1	SMAD2::SMAD3::SMAD4	0.0158	1	579	0.122748
MA0003.3	TFAP2A	0.00562	1	579	0.122748
MA0809.1	TEAD4	0.00595	1	579	0.122748
MA0788.1	POU3F3	0.0129	1	579	0.122748
MA0812.1	TFAP2B(var.2)	0.0103	1	579	0.122748
MA0161.2	NFIC	0.0141	1	579	0.122748
MA0624.1	NFATC1	0.00452	1	579	0.122748
MA0706.1	MEOX2	0.00731	1	579	0.122748
MA0037.3	GATA3	0.0121	1	579	0.122748
MA1102.1	CTCFL	0.013	1	579	0.122748
MA0036.3	GATA2	0.0124	1	579	0.122748
MA0515.1	Sox6	0.0124	1	579	0.122748
MA1142.1	FOSL1::JUND	0.00801	1	579	0.122748
MA0792.1	POU5F1B	0.00978	1	579	0.122748
MA0842.1	NRL	0.0101	1	579	0.122748
MA0089.1	MAFG::NFE2L1	0.00847	1	579	0.122748
MA0877.1	Barhl1	0.00662	1	579	0.122748
MA0902.1	HOXB2	0.008	1	579	0.122748
MA0042.2	FOXI1	0.0139	1	579	0.122748
MA0903.1	HOXB3	0.0087	1	579	0.122748
MA0786.1	POU3F1	0.0151	1	579	0.122748
MA0693.2	VDR	0.0101	1	579	0.122748
MA0900.1	HOXA2	0.0099	1	579	0.122748
MA0041.1	Foxd3	0.0115	1	579	0.122748
MA0006.1	Ahr::Arnt	0.0133	1	579	0.122748
MA0913.1	Hoxd9	0.0103	1	579	0.122748
MA0893.1	GSX2	0.0159	1	579	0.122748
MA0892.1	GSX1	0.0151	1	579	0.122748
MA0879.1	Dlx1	0.0124	1	579	0.122748
MA0775.1	MEIS3	0.0144	1	579	0.122748
MA0723.1	VAX2	0.0118	1	579	0.122748
MA0703.1	LMX1B	0.0115	1	579	0.122748
MA0090.2	TEAD1	0.0128	1	579	0.122748
MA0675.1	NKX6-2	0.01	1	579	0.122748
MA0136.2	ELF5	0.0147	1	579	0.122748
MA0625.1	NFATC3	0.0152	1	579	0.122748
MA0612.1	EMX1	0.011	1	579	0.122748
MA0602.1	Arid5a	0.0159	1	579	0.122748
MA0601.1	Arid3b	0.0155	1	579	0.122748
MA0158.1	HOXA5	0.0148	1	579	0.122748
MA0152.1	NFATC2	0.014	1	579	0.122748
MA0081.1	SPIB	0.00922	1	579	0.122748
MA0606.1	NFAT5	0.0166	1	579	0.126466
MA0647.1	GRHL1	0.0212	1	579	0.128798
MA0627.1	Pou2f3	0.0198	1	579	0.128798
MA0690.1	TBX21	0.0203	1	579	0.128798
MA0145.3	TFCP2	0.0192	1	579	0.128798
MA0784.1	POU1F1	0.0191	1	579	0.128798
MA0689.1	TBX20	0.0218	1	579	0.128798
MA0071.1	RORA	0.0217	1	579	0.128798
MA0131.2	HINFP	0.0173	1	579	0.128798
MA0111.1	Spz1	0.0201	1	579	0.128798
MA1120.1	SOX13	0.0216	1	579	0.128798
MA0442.2	SOX10	0.0195	1	579	0.128798
MA0888.1	EVX2	0.0195	1	579	0.128798
MA0881.1	Dlx4	0.0206	1	579	0.128798
MA0878.1	CDX1	0.0198	1	579	0.128798
MA0848.1	FOXO4	0.0204	1	579	0.128798
MA0846.1	FOXC2	0.0184	1	579	0.128798
MA0725.1	VSX1	0.02	1	579	0.128798
MA0722.1	VAX1	0.0174	1	579	0.128798
MA0701.1	LHX9	0.0189	1	579	0.128798
MA0144.2	STAT3	0.0215	1	579	0.128798
MA0078.1	Sox17	0.021	1	579	0.128798
MA0067.1	Pax2	0.0192	1	579	0.128798
MA0063.1	Nkx2-5	0.0222	1	579	0.129836
MA0891.1	GSC2	0.0231	1	579	0.133749
MA0083.3	SRF	0.0285	0.58	336	0.14167
MA0119.1	NFIC::TLX1	0.0342	0.951	551	0.14167
MA0116.1	Znf423	0.0342	0.98	568	0.14167
MA0768.1	LEF1	0.0342	1	579	0.14167
MA0897.1	Hmx2	0.0253	1	579	0.14167
MA0873.1	HOXD12	0.0342	1	579	0.14167
MA0898.1	Hmx3	0.0249	1	579	0.14167
MA0769.1	Tcf7	0.0342	1	579	0.14167
MA1421.1	TCF7L1	0.0342	1	579	0.14167
MA0772.1	IRF7	0.0285	1	579	0.14167
MA0906.1	HOXC12	0.0342	1	579	0.14167
MA0651.1	HOXC11	0.0342	1	579	0.14167
MA0789.1	POU3F4	0.0256	1	579	0.14167
MA1121.1	TEAD2	0.0285	1	579	0.14167
MA1118.1	SIX1	0.0251	1	579	0.14167
MA1115.1	POU5F1	0.0322	1	579	0.14167
MA0908.1	HOXD11	0.0342	1	579	0.14167
MA0882.1	DLX6	0.0288	1	579	0.14167
MA0880.1	Dlx3	0.0329	1	579	0.14167
MA0876.1	BSX	0.0316	1	579	0.14167
MA0875.1	BARX1	0.0343	1	579	0.14167
MA0872.1	TFAP2A(var.3)	0.0302	1	579	0.14167
MA0851.1	Foxj3	0.0317	1	579	0.14167
MA0850.1	FOXP3	0.0345	1	579	0.14167
MA0849.1	FOXO6	0.0341	1	579	0.14167
MA0793.1	POU6F2	0.0287	1	579	0.14167
MA0790.1	POU4F1	0.0334	1	579	0.14167
MA0739.1	Hic1	0.0271	1	579	0.14167
MA0702.1	LMX1A	0.0296	1	579	0.14167
MA0688.1	TBX2	0.0266	1	579	0.14167
MA0048.2	NHLH1	0.0285	1	579	0.14167
MA0661.1	MEOX1	0.0324	1	579	0.14167
MA0634.1	ALX3	0.0277	1	579	0.14167
MA0630.1	SHOX	0.026	1	579	0.14167
MA0614.1	Foxj2	0.0285	1	579	0.14167
MA0137.3	STAT1	0.0335	1	579	0.14167
MA0523.1	TCF7L2	0.0309	1	579	0.14167
MA0470.1	E2F4	0.0266	1	579	0.14167
MA0146.2	Zfx	0.0293	1	579	0.14167
MA0109.1	HLTF	0.0285	1	579	0.14167
MA0087.1	Sox5	0.0329	1	579	0.14167
MA0905.1	HOXC10	0.035	1	579	0.142711
MA0631.1	Six3	0.0358	0.996	577	0.14475
MA0899.1	HOXA10	0.0363	1	579	0.14475
MA0716.1	PRRX1	0.0363	1	579	0.14475
MA0485.1	Hoxc9	0.0365	1	579	0.14475
MA0726.1	VSX2	0.0378	1	579	0.147276
MA0132.2	PDX1	0.0377	1	579	0.147276
MA0671.1	NFIX	0.0379	1	579	0.147276
MA0139.1	CTCF	0.0388	1	579	0.148781
MA0883.1	Dmbx1	0.0398	1	579	0.148781
MA0481.2	FOXP1	0.0398	1	579	0.148781
MA0032.2	FOXC1	0.0403	1	579	0.148781
MA0721.1	UNCX	0.0394	1	579	0.148781
MA0717.1	RAX2	0.0404	1	579	0.148781
MA0618.1	LBX1	0.0406	1	579	0.148781
MA0095.2	YY1	0.0401	1	579	0.148781
MA0467.1	Crx	0.0401	1	579	0.148781
MA0662.1	MIXL1	0.0418	1	579	0.152215
MA0719.1	RHOXF1	0.0425	1	579	0.153797
MA1153.1	Smad4	0.0432	1	579	0.1544
MA0887.1	EVX1	0.0431	1	579	0.1544
MA0528.1	ZNF263	0.0437	1	579	0.155229
MA0075.2	Prrx2	0.0452	1	579	0.159578
MA0151.1	Arid3a	0.0458	1	579	0.160716
MA0163.1	PLAG1	0.0471	1	579	0.162327
MA0808.1	TEAD3	0.0471	1	579	0.162327
MA0724.1	VENTX	0.0468	1	579	0.162327
MA1109.1	NEUROD1	0.0493	1	579	0.166928
MA0699.1	LBX2	0.0493	1	579	0.166928
MA0507.1	POU2F2	0.0493	1	579	0.166928
MA0847.1	FOXD2	0.0504	1	579	0.16868
MA0712.1	OTX2	0.0502	1	579	0.16868
MA1152.1	SOX15	0.0523	1	579	0.172055
MA1119.1	SIX2	0.0518	1	579	0.172055
MA0871.1	TFEC	0.0523	1	579	0.172055
MA0043.2	HLF	0.0527	1	579	0.172392
MA0472.2	EGR2	0.053	1	579	0.172399
MA0748.1	YY2	0.0536	1	579	0.173377
MA1117.1	RELB	0.0542	1	579	0.174343
MA0710.1	NOTO	0.0553	1	579	0.176899
MA0885.1	Dlx2	0.0567	1	579	0.180381
MA0462.1	BATF::JUN	0.0593	1	579	0.187621
MA0813.1	TFAP2B(var.3)	0.0601	1	579	0.187633
MA0474.2	ERG	0.0606	1	579	0.187633
MA0666.1	MSX1	0.0604	1	579	0.187633
MA0038.1	Gfi1	0.06	1	579	0.187633
MA0103.3	ZEB1	0.0613	1	579	0.188791
MA0486.2	HSF1	0.0672	1	579	0.196509
MA0770.1	HSF2	0.0672	1	579	0.196509
MA0914.1	ISL2	0.0642	1	579	0.196509
MA0907.1	HOXC13	0.0672	1	579	0.196509
MA0771.1	HSF4	0.0672	1	579	0.196509
MA0755.1	CUX2	0.065	1	579	0.196509
MA0741.1	KLF16	0.0652	1	579	0.196509
MA0673.1	NKX2-8	0.0672	1	579	0.196509
MA0506.1	NRF1	0.0672	1	579	0.196509
MA0084.1	SRY	0.0672	1	579	0.196509
MA0494.1	Nr1h3::Rxra	0.0709	1	579	0.201112
MA0852.2	FOXK1	0.0701	1	579	0.201112
MA0886.1	EMX2	0.0716	1	579	0.201112
MA0815.1	TFAP2C(var.3)	0.0696	1	579	0.201112
MA0762.1	ETV2	0.0709	1	579	0.201112
MA0645.1	ETV6	0.0713	1	579	0.201112
MA0632.1	Tcfl5	0.0711	1	579	0.201112
MA0499.1	Myod1	0.0709	1	579	0.201112
MA0514.1	Sox3	0.0719	1	579	0.201112
MA0682.1	Pitx1	0.0726	1	579	0.202093
MA1123.1	TWIST1	0.0762	1	579	0.2111
MA0039.3	KLF4	0.0772	1	579	0.211843
MA0035.3	Gata1	0.0769	1	579	0.211843
MA0508.2	PRDM1	0.0799	1	579	0.217193
MA0610.1	DMRT3	0.0796	1	579	0.217193
MA0845.1	FOXB1	0.0809	1	579	0.217866
MA0635.1	BARHL2	0.0807	1	579	0.217866
MA0778.1	NFKB2	0.0825	1	579	0.220127
MA0718.1	RAX	0.0825	1	579	0.220127
MA0791.1	POU4F3	0.0874	1	579	0.231071
MA1099.1	Hes1	0.0874	1	579	0.231071
MA0147.3	MYC	0.0913	1	579	0.237052
MA0691.1	TFAP4	0.0913	1	579	0.237052
MA0644.1	ESX1	0.0909	1	579	0.237052
MA0148.3	FOXA1	0.0908	1	579	0.237052
MA0720.1	Shox2	0.0927	1	579	0.239613
MA0714.1	PITX3	0.0932	1	579	0.239835
MA1103.1	FOXK2	0.0963	1	579	0.243483
MA0754.1	CUX1	0.0962	1	579	0.243483
MA0593.1	FOXP2	0.0963	1	579	0.243483
MA0031.1	FOXD1	0.0956	1	579	0.243483
MA0503.1	Nkx2-5(var.2)	0.0968	1	579	0.243683
MA0749.1	ZBED1	0.0991	0.847	490	0.245151
MA0795.1	SMAD3	0.0991	1	579	0.245151
MA1106.1	HIF1A	0.0995	1	579	0.245151
MA0477.1	FOSL1	0.0991	1	579	0.245151
MA0065.2	Pparg::Rxra	0.0986	1	579	0.245151
MA0598.2	EHF	0.1	1	579	0.245339
MA0816.1	Ascl2	0.102	1	579	0.248143
MA0040.1	Foxq1	0.102	1	579	0.248143
MA0649.1	HEY2	0.104	1	579	0.249859
MA0611.1	Dux	0.104	1	579	0.249859
MA0155.1	INSM1	0.104	1	579	0.249859
MA0164.1	Nr2e3	0.106	1	579	0.253612
MA0909.1	HOXD13	0.108	1	579	0.257333
MA0738.1	HIC2	0.109	1	579	0.257596
MA0050.2	IRF1	0.109	1	579	0.257596
MA0670.1	NFIA	0.11	1	579	0.258902
MA0904.1	Hoxb5	0.111	1	579	0.260198
MA0629.1	Rhox11	0.112	1	579	0.261484
MA0521.1	Tcf12	0.113	1	579	0.262759
MA0524.2	TFAP2C	0.114	1	579	0.264024
MA0594.1	Hoxa9	0.115	1	579	0.265279
MA0707.1	MNX1	0.118	1	579	0.270047
MA0704.1	Lhx4	0.118	1	579	0.270047
MA0697.1	ZIC3	0.119	1	579	0.271264
MA0640.1	ELF3	0.12	1	579	0.272471
MA0072.1	RORA(var.2)	0.124	1	579	0.277749
MA1105.1	GRHL2	0.126	1	579	0.277749
MA0802.1	TBR1	0.124	1	579	0.277749
MA0763.1	ETV3	0.126	1	579	0.277749
MA0753.1	ZNF740	0.125	1	579	0.277749
MA0751.1	ZIC4	0.128	1	579	0.277749
MA0747.1	SP8	0.13	1	579	0.277749
MA0708.1	MSX2	0.13	1	579	0.277749
MA0650.1	HOXA13	0.13	1	579	0.277749
MA0033.2	FOXL1	0.125	1	579	0.277749
MA0479.1	FOXH1	0.13	1	579	0.277749
MA0489.1	JUN(var.2)	0.125	1	579	0.277749
MA0490.1	JUNB	0.128	1	579	0.277749
MA0092.1	Hand1::Tcf3	0.13	1	579	0.277749
MA0077.1	SOX9	0.13	1	579	0.277749
MA0059.1	MAX::MYC	0.13	1	579	0.277749
MA1148.1	PPARA::RXRA	0.131	1	579	0.278857
MA0068.2	PAX4	0.133	1	579	0.282077
MA0157.2	FOXO3	0.134	1	579	0.282131
MA0130.1	ZNF354C	0.134	1	579	0.282131
MA0760.1	ERF	0.135	1	579	0.283207
MA0025.1	NFIL3	0.136	1	579	0.284274
MA0628.1	POU6F1	0.139	1	579	0.2895
MA0122.2	NKX3-2	0.14	1	579	0.290538
MA0617.1	Id2	0.141	1	579	0.291568
MA0700.1	LHX2	0.142	1	579	0.292591
MA1126.1	FOS::JUN(var.2)	0.143	1	579	0.293606
MA0488.1	JUN	0.148	1	579	0.302799
MA0676.1	Nr2e1	0.149	1	579	0.303771
MA0463.1	Bcl6	0.15	1	579	0.304737
MA1125.1	ZNF384	0.152	1	579	0.30772
MA0805.1	TBX1	0.153	1	579	0.308666
MA0740.1	KLF14	0.156	1	579	0.313625
MA0027.2	EN1	0.157	1	579	0.314543
MA0112.3	ESR1	0.16	0.704	408	0.316177
MA1122.1	TFDP1	0.159	1	579	0.316177
MA1112.1	NR4A1	0.16	1	579	0.316177
MA0160.1	NR4A2	0.16	1	579	0.316177
MA0734.1	GLI2	0.163	1	579	0.32101
MA1116.1	RBPJ	0.164	1	579	0.321885
MA0794.1	PROX1	0.172	1	579	0.33307
MA0833.1	ATF4	0.171	1	579	0.33307
MA0607.1	Bhlha15	0.172	1	579	0.33307
MA0476.1	FOS	0.172	1	579	0.33307
MA0683.1	POU4F2	0.174	1	579	0.333306
MA1134.1	FOS::JUNB	0.175	1	579	0.333306
MA1111.1	NR2F2	0.175	1	579	0.333306
MA0901.1	HOXB13	0.175	1	579	0.333306
MA0471.1	E2F6	0.173	1	579	0.333306
MA0019.1	Ddit3::Cebpa	0.178	1	579	0.337908
MA0765.1	ETV5	0.179	1	579	0.338696
MA1149.1	RARA::RXRG	0.185	1	579	0.339103
MA1101.1	BACH2	0.188	1	579	0.339103
MA0912.1	Hoxd3	0.181	1	579	0.339103
MA0843.1	TEF	0.182	1	579	0.339103
MA0811.1	TFAP2B	0.186	1	579	0.339103
MA0801.1	MGA	0.185	1	579	0.339103
MA0709.1	Msx3	0.188	1	579	0.339103
MA0667.1	MYF6	0.188	1	579	0.339103
MA0616.1	Hes2	0.185	1	579	0.339103
MA0591.1	Bach1::Mafk	0.188	1	579	0.339103
MA0150.2	Nfe2l2	0.185	1	579	0.339103
MA0076.2	ELK4	0.188	1	579	0.339103
MA0527.1	ZBTB33	0.181	1	579	0.339103
MA0519.1	Stat5a::Stat5b	0.186	1	579	0.339103
MA0030.1	FOXF2	0.183	1	579	0.339103
MA0100.3	MYB	0.19	1	579	0.339537
MA0504.1	NR2C2	0.189	1	579	0.339537
MA0057.1	MZF1(var.2)	0.19	1	579	0.339537
MA1127.1	FOSB::JUN	0.193	1	579	0.343837
MA0807.1	TBX5	0.194	1	579	0.344558
MA1144.1	FOSL2::JUND	0.196	1	579	0.344601
MA1141.1	FOS::JUND	0.196	1	579	0.344601
MA0104.4	MYCN	0.197	1	579	0.344601
MA0093.2	USF1	0.196	1	579	0.344601
MA0500.1	Myog	0.197	1	579	0.344601
MA0819.1	CLOCK	0.198	1	579	0.345307
MA0516.1	SP2	0.201	1	579	0.349486
MA1135.1	FOSB::JUNB	0.203	1	579	0.351907
MA0002.2	RUNX1	0.208	1	579	0.359499
MA0692.1	TFEB	0.21	1	579	0.360801
MA0509.1	Rfx1	0.21	1	579	0.360801
MA0803.1	TBX15	0.211	1	579	0.361447
MA0759.1	ELK3	0.214	1	579	0.364429
MA0597.1	THAP1	0.214	1	579	0.364429
MA0839.1	CREB3L1	0.216	1	579	0.365684
MA0501.1	MAF::NFE2	0.216	1	579	0.365684
MA1420.1	IRF5	0.22	1	579	0.370291
MA0125.1	Nobox	0.22	1	579	0.370291
MA1133.1	JUN::JUNB(var.2)	0.224	1	579	0.37269
MA1130.1	FOSL2::JUN	0.224	1	579	0.37269
MA0028.2	ELK1	0.223	1	579	0.37269
MA0491.1	JUND	0.224	1	579	0.37269
MA0642.1	EN2	0.226	1	579	0.37494
MA0823.1	HEY1	0.231	1	579	0.38214
MA1138.1	FOSL2::JUNB	0.232	1	579	0.382701
MA0492.1	JUND(var.2)	0.235	1	579	0.386548
MA0750.2	ZBTB7A	0.237	1	579	0.388734
MA0621.1	mix-a	0.238	1	579	0.389271
MA0124.2	Nkx3-1	0.239	1	579	0.389806
MA0742.1	Klf12	0.243	1	579	0.393008
MA0711.1	OTX1	0.243	1	579	0.393008
MA0685.1	SP4	0.243	1	579	0.393008
MA0874.1	Arx	0.244	1	579	0.393526
MA0655.1	JDP2	0.247	1	579	0.396158
MA0475.2	FLI1	0.247	1	579	0.396158
MA0764.1	ETV4	0.249	1	579	0.398262
MA0776.1	MYBL1	0.253	1	579	0.402437
MA0619.1	LIN54	0.253	1	579	0.402437
MA0797.1	TGIF2	0.257	1	579	0.404356
MA0732.1	EGR3	0.257	1	579	0.404356
MA0468.1	DUX4	0.257	1	579	0.404356
MA0478.1	FOSL2	0.255	1	579	0.404356
MA0715.1	PROP1	0.258	1	579	0.404829
MA0088.2	ZNF143	0.261	1	579	0.40843
MA0105.4	NFKB1	0.262	1	579	0.408889
MA0681.1	Phox2b	0.264	1	579	0.410903
MA0099.3	FOS::JUN	0.269	1	579	0.41204
MA0825.1	MNT	0.267	1	579	0.41204
MA0461.2	Atoh1	0.267	1	579	0.41204
MA0746.1	SP3	0.269	1	579	0.41204
MA0626.1	Npas2	0.269	1	579	0.41204
MA0605.1	Atf3	0.267	1	579	0.41204
MA0079.3	SP1	0.274	1	579	0.417489
MA0497.1	MEF2C	0.274	1	579	0.417489
MA0910.1	Hoxd8	0.277	1	579	0.420953
MA0639.1	DBP	0.278	1	579	0.421366
MA0889.1	GBX1	0.281	1	579	0.424802
MA0511.2	RUNX2	0.284	1	579	0.428219
MA1100.1	ASCL1	0.287	1	579	0.431618
MA0114.3	Hnf4a	0.294	1	579	0.433145
MA1143.1	FOSL1::JUND(var.2)	0.29	1	579	0.433145
MA0780.1	PAX3	0.293	1	579	0.433145
MA0713.1	PHOX2A	0.294	1	579	0.433145
MA0648.1	GSC	0.292	1	579	0.433145
MA0643.1	Esrrg	0.292	1	579	0.433145
MA0604.1	Atf1	0.292	1	579	0.433145
MA0073.1	RREB1	0.291	1	579	0.433145
MA0684.1	RUNX3	0.297	1	579	0.435349
MA0664.1	MLXIPL	0.297	1	579	0.435349
MA0861.1	TP73	0.299	1	579	0.436073
MA0831.2	TFE3	0.299	1	579	0.436073
MA0062.2	Gabpa	0.3	1	579	0.436432
MA0806.1	TBX4	0.306	1	579	0.444045
MA0694.1	ZBTB7B	0.308	1	579	0.44583
MA0156.2	FEV	0.31	1	579	0.447606
MA1137.1	FOSL1::JUNB	0.314	1	579	0.451132
MA0672.1	NKX2-3	0.314	1	579	0.451132
MA0098.3	ETS1	0.317	1	579	0.454314
MA0641.1	ELF4	0.32	1	579	0.457481
MA0761.1	ETV1	0.323	1	579	0.460633
MA0895.1	HMBOX1	0.324	1	579	0.460924
MA0505.1	Nr5a2	0.325	1	579	0.461213
MA0058.3	MAX	0.329	1	579	0.463482
MA0656.1	JDP2(var.2)	0.329	1	579	0.463482
MA0480.1	Foxo1	0.329	1	579	0.463482
MA0153.2	HNF1B	0.33	1	579	0.463762
MA1145.1	FOSL2::JUND(var.2)	0.333	1	579	0.466845
MA0836.1	CEBPD	0.338	1	579	0.471215
MA0633.1	Twist2	0.341	1	579	0.471215
MA0595.1	SREBF1	0.341	1	579	0.471215
MA0140.2	GATA1::TAL1	0.34	1	579	0.471215
MA0259.1	ARNT::HIF1A	0.34	1	579	0.471215
MA0056.1	MZF1	0.341	1	579	0.471215
MA0829.1	Srebf1(var.2)	0.344	1	579	0.473102
MA0695.1	ZBTB7C	0.344	1	579	0.473102
MA0894.1	HESX1	0.346	1	579	0.474725
MA0135.1	Lhx3	0.35	1	579	0.479078
MA1131.1	FOSL2::JUN(var.2)	0.355	1	579	0.484776
MA0737.1	GLIS3	0.364	1	579	0.486734
MA0837.1	CEBPE	0.363	1	579	0.486734
MA0827.1	OLIG3	0.36	1	579	0.486734
MA0696.1	ZIC1	0.363	1	579	0.486734
MA0677.1	Nr2f6	0.362	1	579	0.486734
MA0102.3	CEBPA	0.364	1	579	0.486734
MA0493.1	Klf1	0.363	1	579	0.486734
MA0517.1	STAT1::STAT2	0.363	1	579	0.486734
MA0029.1	Mecom	0.364	1	579	0.486734
MA0841.1	NFE2	0.37	1	579	0.493618
MA0832.1	Tcf21	0.371	1	579	0.493814
MA1129.1	FOSL1::JUN(var.2)	0.372	1	579	0.494009
MA0679.1	ONECUT1	0.375	1	579	0.496854
MA0810.1	TFAP2A(var.2)	0.379	1	579	0.499866
MA0646.1	GCM1	0.379	1	579	0.499866
MA1146.1	NR1A4::RXRA	0.384	1	579	0.501887
MA0526.2	USF2	0.382	1	579	0.501887
MA0834.1	ATF7	0.383	1	579	0.501887
MA0658.1	LHX6	0.384	1	579	0.501887
MA1108.1	MXI1	0.386	1	579	0.502234
MA0495.2	MAFF	0.386	1	579	0.502234
MA0804.1	TBX19	0.387	1	579	0.502406
MA0603.1	Arntl	0.389	1	579	0.503872
MA0657.1	KLF13	0.394	1	579	0.50921
MA1132.1	JUN::JUNB	0.396	1	579	0.510655
MA1114.1	PBX3	0.398	1	579	0.512093
MA0496.2	MAFK	0.399	1	579	0.512242
MA0017.2	NR2F1	0.402	1	579	0.514951
MA0828.1	SREBF2(var.2)	0.407	1	579	0.519059
MA0663.1	MLX	0.407	1	579	0.519059
MA0856.1	RXRG	0.412	1	579	0.524281
MA1139.1	FOSL2::JUNB(var.2)	0.417	1	579	0.52948
MA0890.1	GBX2	0.424	1	579	0.53719
MA0014.3	PAX5	0.425	1	579	0.537282
MA0464.2	BHLHE40	0.426	1	579	0.537373
MA0066.1	PPARG	0.427	1	579	0.537463
MA0599.1	KLF5	0.43	1	579	0.540065
MA1136.1	FOSB::JUNB(var.2)	0.434	1	579	0.542734
MA0767.1	GCM2	0.434	1	579	0.542734
MA0853.1	Alx4	0.435	1	579	0.542813
MA0024.3	E2F1	0.438	1	579	0.545381
MA0466.2	CEBPB	0.443	1	579	0.550423
MA1140.1	JUNB(var.2)	0.446	1	579	0.550666
MA1128.1	FOSL1::JUN	0.447	1	579	0.550666
MA0733.1	EGR4	0.447	1	579	0.550666
MA0652.1	IRF8	0.447	1	579	0.550666
MA0473.2	ELF1	0.454	1	579	0.558102
MA0822.1	HES7	0.458	1	579	0.558278
MA0659.1	MAFG	0.458	1	579	0.558278
MA0698.1	ZBTB18	0.458	1	579	0.558278
MA0608.1	Creb3l2	0.456	1	579	0.558278
MA0108.2	TBP	0.466	1	579	0.566836
MA0018.3	CREB1	0.47	1	579	0.570503
MA0678.1	OLIG2	0.472	1	579	0.571732
MA0705.1	Lhx8	0.475	1	579	0.574165
MA0484.1	HNF4G	0.492	1	579	0.593475
MA0817.1	BHLHE23	0.502	1	579	0.604279
MA0854.1	Alx1	0.514	1	579	0.616161
MA0004.1	Arnt	0.513	1	579	0.616161
MA0074.1	RXRA::VDR	0.519	1	579	0.61959
MA0141.3	ESRRB	0.518	1	579	0.61959
MA0596.1	SREBF2	0.523	1	579	0.62308
MA0863.1	MTF1	0.535	1	579	0.63078
MA0777.1	MYBL2	0.535	1	579	0.63078
MA0756.1	ONECUT2	0.535	1	579	0.63078
MA0592.2	Esrra	0.536	1	579	0.63078
MA0512.2	Rxra	0.535	1	579	0.63078
MA0101.1	REL	0.533	1	579	0.63078
MA0818.1	BHLHE22	0.538	1	579	0.63185
MA0884.1	DUXA	0.545	1	579	0.638775
MA0859.1	Rarg	0.551	1	579	0.643204
MA0653.1	IRF9	0.551	1	579	0.643204
MA0798.1	RFX3	0.555	1	579	0.646569
MA0622.1	Mlxip	0.558	1	579	0.648759
MA0821.1	HES5	0.566	1	579	0.656741
MA0638.1	CREB3	0.575	1	579	0.66585
MA0600.2	RFX2	0.585	1	579	0.675884
MA0654.1	ISX	0.586	1	579	0.675884
MA0855.1	RXRB	0.595	1	579	0.683335
MA0840.1	Creb5	0.596	1	579	0.683335
MA0686.1	SPDEF	0.596	1	579	0.683335
MA0799.1	RFX4	0.604	1	579	0.691138
MA0620.2	MITF	0.606	1	579	0.691394
MA0835.1	BATF3	0.609	1	579	0.691394
MA0636.1	BHLHE41	0.609	1	579	0.691394
MA0069.1	Pax6	0.608	1	579	0.691394
MA0107.1	RELA	0.614	1	579	0.695706
MA0060.3	NFYA	0.616	1	579	0.696609
MA0051.1	IRF2	0.623	1	579	0.703152
MA0669.1	NEUROG2	0.627	1	579	0.70629
MA0728.1	Nr2f6(var.2)	0.636	1	579	0.713651
MA0727.1	NR3C2	0.636	1	579	0.713651
MA0070.1	PBX1	0.638	1	579	0.714511
MA0052.3	MEF2A	0.64	1	579	0.715367
MA0046.2	HNF1A	0.648	1	579	0.722913
MA0154.3	EBF1	0.656	1	579	0.730431
MA1147.1	NR4A2::RXRA	0.663	1	579	0.735098
MA0745.1	SNAI2	0.664	1	579	0.735098
MA0668.1	NEUROD2	0.664	1	579	0.735098
MA1419.1	IRF4	0.672	1	579	0.742534
MA0091.1	TAL1::TCF3	0.674	1	579	0.743326
MA0838.1	CEBPG	0.689	1	579	0.758424
MA0680.1	PAX7	0.704	1	579	0.772
MA0149.1	EWSR1-FLI1	0.704	1	579	0.772
MA0665.1	MSC	0.71	1	579	0.777108
MA1155.1	ZSCAN4	0.724	1	579	0.790936
MA0826.1	OLIG1	0.734	1	579	0.80035
MA0862.1	GMEB2	0.738	1	579	0.801692
MA0615.1	Gmeb1	0.738	1	579	0.801692
MA0757.1	ONECUT3	0.757	1	579	0.820792
MA0522.2	TCF3	0.76	1	579	0.822505
MA0510.2	RFX5	0.764	1	579	0.825291
MA0830.1	TCF4	0.783	1	579	0.843747
MA0782.1	PKNOX1	0.784	1	579	0.843747
MA0820.1	FIGLA	0.813	1	579	0.873334
MA0824.1	ID4	0.823	1	579	0.880808
MA0744.1	SCRT2	0.822	1	579	0.880808
MA0502.1	NFYB	0.837	1	579	0.894138
MA0162.3	EGR1	0.842	1	579	0.897823
MA0637.1	CENPB	0.869	1	579	0.92491
MA0844.1	XBP1	0.872	1	579	0.9264
MA0773.1	MEF2D	0.888	1	579	0.94167
MA0609.1	Crem	0.891	1	579	0.943124
MA0660.1	MEF2B	0.908	1	579	0.959365
MA0743.1	SCRT1	0.943	1	579	0.99453
MA0869.1	Sox11	1	1	579	1
MA0867.1	SOX4	1	1	579	1
MA0735.1	GLIS1	1	1	579	1
MA0731.1	BCL6B	1	1	579	1
MA0729.1	RARA	1	1	579	1
MA1418.1	IRF3	1	1	579	1
MA1154.1	ZNF282	1	1	579	1
MA0870.1	Sox1	1	1	579	1
MA0868.1	SOX8	1	1	579	1
MA0866.1	SOX21	1	1	579	1
MA0865.1	E2F8	1	1	579	1
MA0864.1	E2F2	1	1	579	1
MA0106.3	TP53	1	1	579	1
MA0525.2	TP63	1	1	579	1
MA0860.1	Rarg(var.2)	1	1	579	1
MA0858.1	Rarb(var.2)	1	1	579	1
MA0857.1	Rarb	1	1	579	1
MA0796.1	TGIF1	1	1	579	1
MA0783.1	PKNOX2	1	1	579	1
MA0781.1	PAX9	1	1	579	1
MA0779.1	PAX1	1	1	579	1
MA0758.1	E2F7	1	1	579	1
MA0469.2	E2F3	1	1	579	1
MA0752.1	ZNF410	1	1	579	1
MA0730.1	RARA(var.2)	1	1	579	1
MA0113.3	NR3C1	1	1	579	1
MA0009.2	T	1	1	579	1
MA0007.3	Ar	1	1	579	1
MA0138.2	REST	1	1	579	1
MA0115.1	NR1H2::RXRA	1	1	579	1
