# Supplementary material for: Widespread Repression of Gene Expression in Cancer by a Wnt/β-Catenin/MAPK Pathway
Source: Oxford University Press journal article supplement (doi:10.1158/0008-5472.can-20-2129), 2020-11-17
Supplement: 00085472can202129-sup-245850_3_supp_6707324_qjhksx.xlsx [file 00085472can202129-sup-245850_3_supp_6707324_qjhksx.xlsx]

## Sheet: DifferentialExpression
					ETC vs VEH		TRAM vs VEH		TRAM + ETC vs VEH		TRAM vs ETC		TRAM + ETC vs ETC		TRAM + ETC vs TRAM
Gene ID	hgnc_symbol	description	gene_biotype	group adjusted-pvalue	etc_vs_veh_lfc	etc_vs_veh_padj	tram_vs_veh_lfc	tram_vs_veh_padj	trametc_vs_veh_lfc	trametc_vs_veh_padj	tram_vs_etc_lfc	tram_vs_etc_padj	trametc_vs_etc_lfc	trametc_vs_etc_padj	trametc_vs_tram_lfc	trametc_vs_tram_padj
ENSG00000000003	TSPAN6	tetraspanin 6 [Source:HGNC Symbol;Acc:HGNC:11858]	protein_coding	7.96119e-07	-0.460096	3.54739e-05	0.115394	0.548165	-0.289997	0.0210849	0.57549	1.53232e-06	0.170099	0.288851	-0.405391	0.00251263
ENSG00000000419	DPM1	dolichyl-phosphate mannosyltransferase polypeptide 1, catalytic subunit [Source:HGNC Symbol;Acc:HGNC:3005]	protein_coding	0.000163019	-0.165916	0.0944039	-0.234875	0.0778123	-0.444879	1.53789e-05	-0.0689587	0.557036	-0.278963	0.0222786	-0.210004	0.0796366
ENSG00000000457	SCYL3	SCY1-like 3 (S. cerevisiae) [Source:HGNC Symbol;Acc:HGNC:19285]	protein_coding	0.429231	-0.0529124	0.653275	0.0778189	0.675154	0.108745	0.377474	0.130731	0.278984	0.161658	0.26873	0.0309263	0.841229
ENSG00000000460	C1orf112	chromosome 1 open reading frame 112 [Source:HGNC Symbol;Acc:HGNC:25565]	protein_coding	7.97145e-26	-1.4641	3.43678e-19	-0.285886	0.243669	-1.41749	1.29319e-15	1.17821	3.67222e-11	0.0466053	0.885319	-1.13161	5.13859e-09
ENSG00000000971	CFH	complement factor H [Source:HGNC Symbol;Acc:HGNC:4883]	protein_coding	7.67183e-63	1.47438	2.49478e-48	0.178236	0.277324	1.23822	2.23465e-29	-1.29615	2.94325e-32	-0.23616	0.0918869	1.05999	6.55188e-19
ENSG00000001036	FUCA2	fucosidase, alpha-L- 2, plasma [Source:HGNC Symbol;Acc:HGNC:4008]	protein_coding	8.76469e-26	-0.898758	2.84554e-16	-0.224748	0.181287	-1.08058	1.21568e-19	0.67401	2.22561e-08	-0.181826	0.259178	-0.855836	4.9902e-11
ENSG00000001084	GCLC	glutamate-cysteine ligase, catalytic subunit [Source:HGNC Symbol;Acc:HGNC:4311]	protein_coding	1.0336e-20	-0.872324	1.26044e-17	-0.248832	0.0897535	-0.769782	4.12649e-12	0.623492	2.61273e-08	0.102543	0.535016	-0.52095	2.34742e-05
ENSG00000001167	NFYA	nuclear transcription factor Y, alpha [Source:HGNC Symbol;Acc:HGNC:7804]	protein_coding	0.313043	-0.0373469	0.817325	-0.221683	0.304099	-0.199742	0.217986	-0.184336	0.253686	-0.162395	0.428788	0.021941	0.918077
ENSG00000001460	STPG1	sperm-tail PG-rich repeat containing 1 [Source:HGNC Symbol;Acc:HGNC:28070]	protein_coding	0.000576699	0.552573	6.08152e-05	0.35861	0.0620677	0.221452	0.17552	-0.193963	0.22366	-0.331121	0.0700664	-0.137158	0.466357
ENSG00000001461	NIPAL3	NIPA-like domain containing 3 [Source:HGNC Symbol;Acc:HGNC:25233]	protein_coding	1.65012e-17	0.646967	9.75435e-11	0.070697	0.713262	0.758532	2.23583e-12	-0.57627	1.26995e-07	0.111565	0.465636	0.687835	5.23132e-09
ENSG00000001497	LAS1L	LAS1-like (S. cerevisiae) [Source:HGNC Symbol;Acc:HGNC:25726]	protein_coding	2.72842e-19	-0.798383	6.05135e-13	-0.132136	0.485692	-0.88212	2.58014e-13	0.666247	3.82574e-08	-0.0837369	0.656951	-0.749984	1.24279e-08
ENSG00000001561	ENPP4	ectonucleotide pyrophosphatase/phosphodiesterase 4 (putative) [Source:HGNC Symbol;Acc:HGNC:3359]	protein_coding	7.52017e-12	1.27147	1.21705e-08	0.119201	0.788118	1.31939	5.66181e-08	-1.15227	2.27134e-06	0.0479205	0.909401	1.20019	6.2584e-06
ENSG00000001617	SEMA3F	sema domain, immunoglobulin domain (Ig), short basic domain, secreted, (semaphorin) 3F [Source:HGNC Symbol;Acc:HGNC:10728]	protein_coding	0.0031011	-0.0934178	0.775639	0.453771	0.267511	-0.731554	0.027488	0.547189	0.0763597	-0.638136	0.114948	-1.18532	0.000474899
ENSG00000001626	CFTR	cystic fibrosis transmembrane conductance regulator (ATP-binding cassette sub-family C, member 7) [Source:HGNC Symbol;Acc:HGNC:1884]	protein_coding	0.0358012	-1.49266	0.0130836	-0.100806	0.92653	-0.891354	0.165035	1.39186	0.0322842	0.60131	0.52522	-0.790547	0.27031
ENSG00000001629	ANKIB1	ankyrin repeat and IBR domain containing 1 [Source:HGNC Symbol;Acc:HGNC:22215]	protein_coding	0.0153146	0.201589	0.107161	-0.147293	0.459298	0.20806	0.132941	-0.348882	0.0080879	0.00647131	0.975956	0.355353	0.0147854
ENSG00000001630	CYP51A1	cytochrome P450, family 51, subfamily A, polypeptide 1 [Source:HGNC Symbol;Acc:HGNC:2649]	protein_coding	0.0107421	0.251439	0.258625	-0.261237	0.447499	-0.427391	0.0718121	-0.512676	0.0267725	-0.67883	0.00857893	-0.166154	0.56795
ENSG00000001631	KRIT1	KRIT1, ankyrin repeat containing [Source:HGNC Symbol;Acc:HGNC:1573]	protein_coding	0.592853	-0.118503	0.309999	-0.088147	0.649492	0.00582629	0.968002	0.0303556	0.829475	0.124329	0.439793	0.0939733	0.529613
ENSG00000002016	RAD52	RAD52 homolog (S. cerevisiae) [Source:HGNC Symbol;Acc:HGNC:9824]	protein_coding	0.00125144	-0.499407	0.00688505	0.199784	0.494599	-0.259564	0.217842	0.69919	0.000333488	0.239843	0.374361	-0.459348	0.0354112
ENSG00000002079	MYH16	myosin, heavy chain 16 pseudogene [Source:HGNC Symbol;Acc:HGNC:31038]	unitary_pseudogene	0.0114848	0.303482	0.272236	0.301844	0.480087	0.863086	0.00195503	-0.00163745	0.996088	0.559605	0.0977136	0.561242	0.0754149
ENSG00000002330	BAD	BCL2-associated agonist of cell death [Source:HGNC Symbol;Acc:HGNC:936]	protein_coding	7.39662e-05	0.351201	0.00790628	0.356888	0.0464953	0.626654	7.43016e-06	0.00568672	0.975049	0.275453	0.11383	0.269766	0.0984084
ENSG00000002549	LAP3	leucine aminopeptidase 3 [Source:HGNC Symbol;Acc:HGNC:18449]	protein_coding	0.00230041	0.221927	0.136792	-0.307491	0.136139	-0.179481	0.287959	-0.529418	0.000584856	-0.401409	0.0267338	0.12801	0.514751
ENSG00000002586	CD99	CD99 molecule [Source:HGNC Symbol;Acc:HGNC:7082]	protein_coding	0.000283559	-0.512037	0.000286306	0.0250009	0.934221	-0.300037	0.062624	0.537038	0.000467877	0.212	0.295035	-0.325038	0.0653991
ENSG00000002587	HS3ST1	heparan sulfate (glucosamine) 3-O-sulfotransferase 1 [Source:HGNC Symbol;Acc:HGNC:5194]	protein_coding	4.28347e-37	0.853651	6.03672e-09	-1.05411	2.28909e-09	-0.605745	0.000242035	-1.90776	7.97837e-34	-1.4594	1.17077e-18	0.448367	0.0162157
ENSG00000002726	AOC1	amine oxidase, copper containing 1 [Source:HGNC Symbol;Acc:HGNC:80]	protein_coding	0.0770652	0.392406	0.0152195	0.238805	0.344835	0.312859	0.0859412	-0.153601	0.422005	-0.0795468	0.768713	0.0740542	0.752461
ENSG00000002822	MAD1L1	MAD1 mitotic arrest deficient-like 1 (yeast) [Source:HGNC Symbol;Acc:HGNC:6762]	protein_coding	0.000253815	0.286613	0.009043	-0.0166875	0.944155	-0.196749	0.119608	-0.3033	0.0111568	-0.483362	0.000203717	-0.180061	0.201951
ENSG00000002834	LASP1	LIM and SH3 protein 1 [Source:HGNC Symbol;Acc:HGNC:6513]	protein_coding	2.00731e-17	0.769892	1.38759e-14	0.0525324	0.793065	0.550303	6.5752e-07	-0.717359	4.53618e-11	-0.219589	0.112619	0.49777	4.05115e-05
ENSG00000002919	SNX11	sorting nexin 11 [Source:HGNC Symbol;Acc:HGNC:14975]	protein_coding	0.00147539	0.328446	0.00628537	-0.0543532	0.81633	0.304144	0.0220844	-0.382799	0.00327284	-0.0243017	0.911655	0.358497	0.0130063
ENSG00000002933	TMEM176A	transmembrane protein 176A [Source:HGNC Symbol;Acc:HGNC:24930]	protein_coding	6.14678e-11	1.03106	3.25441e-08	0.528366	0.0444051	1.29197	1.44942e-10	-0.502697	0.0170505	0.260907	0.33985	0.763604	0.000705052
ENSG00000003056	M6PR	mannose-6-phosphate receptor (cation dependent) [Source:HGNC Symbol;Acc:HGNC:6752]	protein_coding	0.00557608	-0.225703	0.00137425	-0.106337	0.33851	-0.192706	0.0139413	0.119366	0.138959	0.0329978	0.785218	-0.0863685	0.357502
ENSG00000003147	ICA1	islet cell autoantigen 1, 69kDa [Source:HGNC Symbol;Acc:HGNC:5343]	protein_coding	4.18569e-10	0.918294	3.45658e-08	0.179683	0.538503	0.924863	3.7122e-07	-0.738611	5.45831e-05	0.00656929	0.983665	0.74518	0.000206953
ENSG00000003249	DBNDD1	dysbindin (dystrobrevin binding protein 1) domain containing 1 [Source:HGNC Symbol;Acc:HGNC:28455]	protein_coding	0.58164	0.131714	0.432593	0.168006	0.514006	0.206063	0.251884	0.0362914	0.856344	0.0743492	0.776178	0.0380578	0.868894
ENSG00000003393	ALS2	amyotrophic lateral sclerosis 2 (juvenile) [Source:HGNC Symbol;Acc:HGNC:443]	protein_coding	8.54698e-06	0.23194	0.00855813	0.115834	0.412333	0.444734	1.5788e-06	-0.116106	0.252955	0.212794	0.0601519	0.3289	0.00137556
ENSG00000003400	CASP10	caspase 10, apoptosis-related cysteine peptidase [Source:HGNC Symbol;Acc:HGNC:1500]	protein_coding	0.00766854	0.122041	0.255596	0.320604	0.0145558	0.269387	0.0149751	0.198563	0.0764375	0.147346	0.300215	-0.0512165	0.721524
ENSG00000003402	CFLAR	CASP8 and FADD-like apoptosis regulator [Source:HGNC Symbol;Acc:HGNC:1876]	protein_coding	5.86218e-36	1.02004	3.7804e-23	-0.236475	0.128822	0.559604	1.073e-06	-1.25652	1.39929e-29	-0.460437	0.00029782	0.796079	8.94812e-11
ENSG00000003436	TFPI	tissue factor pathway inhibitor (lipoprotein-associated coagulation inhibitor) [Source:HGNC Symbol;Acc:HGNC:11760]	protein_coding	1.14389e-88	2.25957	6.46273e-65	-0.1297	0.600633	1.38554	2.24155e-21	-2.38927	7.34989e-62	-0.874032	2.76298e-08	1.51524	5.75769e-22
ENSG00000003509	NDUFAF7	NADH dehydrogenase (ubiquinone) complex I, assembly factor 7 [Source:HGNC Symbol;Acc:HGNC:28816]	protein_coding	0.0579431	-0.195456	0.0607389	-0.00558073	0.981482	-0.216072	0.0575992	0.189876	0.0949394	-0.0206153	0.913088	-0.210491	0.093196
ENSG00000003756	RBM5	RNA binding motif protein 5 [Source:HGNC Symbol;Acc:HGNC:9902]	protein_coding	3.76636e-24	0.607254	9.20801e-17	0.165581	0.131393	0.67738	1.02179e-17	-0.441673	3.31656e-08	0.0701263	0.546493	0.511799	3.30801e-09
ENSG00000003989	SLC7A2	solute carrier family 7 (cationic amino acid transporter, y+ system), member 2 [Source:HGNC Symbol;Acc:HGNC:11060]	protein_coding	9.86147e-49	-6.16343	8.77942e-15	0.092791	0.879755	-3.67799	5.47883e-16	6.25622	8.04453e-15	2.48544	0.0177569	-3.77078	1.56922e-15
ENSG00000004059	ARF5	ADP-ribosylation factor 5 [Source:HGNC Symbol;Acc:HGNC:658]	protein_coding	1.2443e-05	0.498694	1.04498e-06	0.259052	0.0764203	0.359328	0.00164118	-0.239642	0.039035	-0.139366	0.353468	0.100276	0.480734
ENSG00000004139	SARM1	sterile alpha and TIR motif containing 1 [Source:HGNC Symbol;Acc:HGNC:17074]	protein_coding	2.8742e-06	-0.647405	0.0012466	0.39828	0.17119	0.21457	0.36803	1.04568	8.37978e-07	0.861975	0.00029576	-0.183709	0.498669
ENSG00000004142	POLDIP2	polymerase (DNA-directed), delta interacting protein 2 [Source:HGNC Symbol;Acc:HGNC:23781]	protein_coding	0.00270132	-0.300857	0.0108944	-0.0171724	0.946836	-0.362543	0.00488402	0.283685	0.0288393	-0.0616855	0.75481	-0.34537	0.0149397
ENSG00000004399	PLXND1	plexin D1 [Source:HGNC Symbol;Acc:HGNC:9107]	protein_coding	1.71518e-55	-1.84663	1.06699e-42	-0.457863	0.0114294	-1.72161	3.82545e-32	1.38876	3.1418e-21	0.125014	0.580742	-1.26375	2.02495e-15
ENSG00000004455	AK2	adenylate kinase 2 [Source:HGNC Symbol;Acc:HGNC:362]	protein_coding	7.69152e-09	-0.401832	1.11065e-05	-0.114461	0.455474	-0.541889	4.18519e-08	0.28737	0.00469235	-0.140057	0.2901	-0.427428	8.89911e-05
ENSG00000004478	FKBP4	FK506 binding protein 4, 59kDa [Source:HGNC Symbol;Acc:HGNC:3720]	protein_coding	4.94941e-15	-0.794208	1.00866e-12	-0.300352	0.0585315	-0.775767	1.76244e-10	0.493855	6.53389e-05	0.0184408	0.932044	-0.475414	0.000480417
ENSG00000004487	KDM1A	lysine (K)-specific demethylase 1A [Source:HGNC Symbol;Acc:HGNC:29079]	protein_coding	1.45991e-19	-0.76605	1.01242e-14	-0.119727	0.479408	-0.733234	1.07988e-11	0.646323	2.2154e-09	0.0328158	0.860348	-0.613507	2.03876e-07
ENSG00000004534	RBM6	RNA binding motif protein 6 [Source:HGNC Symbol;Acc:HGNC:9903]	protein_coding	0.00990816	0.279989	0.0087926	0.265018	0.0728283	0.327707	0.00491929	-0.0149711	0.916348	0.0477179	0.792134	0.0626889	0.680678
ENSG00000004660	CAMKK1	calcium/calmodulin-dependent protein kinase kinase 1, alpha [Source:HGNC Symbol;Acc:HGNC:1469]	protein_coding	1.38412e-16	-1.40208	9.07392e-15	-0.308176	0.252679	-1.10461	1.42079e-08	1.09391	3.07331e-08	0.29747	0.278458	-0.796435	0.000230275
ENSG00000004700	RECQL	RecQ helicase-like [Source:HGNC Symbol;Acc:HGNC:9948]	protein_coding	2.91593e-07	-0.435926	0.000321113	-0.309268	0.0665464	-0.712326	4.60613e-08	0.126659	0.385839	-0.2764	0.0925964	-0.403058	0.00644444
ENSG00000004766	CCDC132	coiled-coil domain containing 132 [Source:HGNC Symbol;Acc:HGNC:25956]	protein_coding	0.552957	-0.0379713	0.751208	-0.0333334	0.873503	0.104599	0.3982	0.00463793	0.974488	0.14257	0.337517	0.137933	0.307614
ENSG00000004777	ARHGAP33	Rho GTPase activating protein 33 [Source:HGNC Symbol;Acc:HGNC:23085]	protein_coding	0.0011887	0.0380799	0.820047	0.490597	0.00807503	0.35628	0.0248062	0.452517	0.00344016	0.3182	0.0915534	-0.134317	0.486254
ENSG00000004779	NDUFAB1	NADH dehydrogenase (ubiquinone) 1, alpha/beta subcomplex, 1, 8kDa [Source:HGNC Symbol;Acc:HGNC:7694]	protein_coding	6.76606e-17	-0.780142	1.23434e-10	-0.148259	0.472812	-0.947976	5.99916e-13	0.631883	1.99986e-06	-0.167833	0.357188	-0.799716	2.74077e-08
ENSG00000004799	PDK4	pyruvate dehydrogenase kinase, isozyme 4 [Source:HGNC Symbol;Acc:HGNC:8812]	protein_coding	2.38947e-16	2.46815	4.52293e-12	0.94392	0.0666635	3.07547	1.64538e-15	-1.52423	0.000116313	0.607319	0.236385	2.13155	5.40099e-07
ENSG00000004838	ZMYND10	zinc finger, MYND-type containing 10 [Source:HGNC Symbol;Acc:HGNC:19412]	protein_coding	1.98697e-16	-1.72966	1.14802e-07	0.963025	0.00807298	-0.636038	0.0615976	2.69269	7.22264e-16	1.09362	0.00945223	-1.59906	2.00983e-06
ENSG00000004864	SLC25A13	solute carrier family 25 (aspartate/glutamate carrier), member 13 [Source:HGNC Symbol;Acc:HGNC:10983]	protein_coding	8.07536e-13	-0.803401	9.35125e-12	-0.24486	0.168292	-0.691857	8.73637e-08	0.558541	1.80329e-05	0.111544	0.556497	-0.446997	0.00204675
ENSG00000004866	ST7	suppression of tumorigenicity 7 [Source:HGNC Symbol;Acc:HGNC:11351]	protein_coding	2.51813e-05	-0.335815	0.00722762	0.124203	0.551188	-0.426866	0.00165073	0.460017	0.000553975	-0.0910509	0.654579	-0.551068	0.000142739
ENSG00000004897	CDC27	cell division cycle 27 [Source:HGNC Symbol;Acc:HGNC:1728]	protein_coding	3.88101e-06	-0.314088	0.00313877	-0.225673	0.140147	-0.57809	3.36562e-07	0.0884148	0.492192	-0.264003	0.0580543	-0.352418	0.00589408
ENSG00000004961	HCCS	holocytochrome c synthase [Source:HGNC Symbol;Acc:HGNC:4837]	protein_coding	0.00356101	0.171276	0.0928881	-0.110033	0.503374	-0.178462	0.115085	-0.281309	0.00900116	-0.349738	0.00372549	-0.068429	0.624421
ENSG00000004975	DVL2	dishevelled segment polarity protein 2 [Source:HGNC Symbol;Acc:HGNC:3086]	protein_coding	5.89703e-06	-0.242252	0.0302539	0.305157	0.0345723	0.18095	0.14442	0.54741	1.87413e-06	0.423202	0.00128768	-0.124207	0.382284
ENSG00000005001	PRSS22	protease, serine, 22 [Source:HGNC Symbol;Acc:HGNC:14368]	protein_coding	1.17603e-63	1.61923	4.49661e-54	0.190841	0.260868	0.847375	2.60625e-13	-1.42839	2.36222e-36	-0.771855	2.6507e-10	0.656535	2.38258e-07
ENSG00000005007	UPF1	UPF1 regulator of nonsense transcripts homolog (yeast) [Source:HGNC Symbol;Acc:HGNC:9962]	protein_coding	0.260938	0.106198	0.179038	-0.0353854	0.807754	-0.00575848	0.954256	-0.141583	0.0944647	-0.111956	0.292056	0.0296269	0.79055
ENSG00000005020	SKAP2	src kinase associated phosphoprotein 2 [Source:HGNC Symbol;Acc:HGNC:15687]	protein_coding	4.62343e-05	0.353476	0.00182969	-0.188468	0.284722	0.124982	0.358575	-0.541944	7.81556e-06	-0.228494	0.135352	0.31345	0.0242068
ENSG00000005022	SLC25A5	solute carrier family 25 (mitochondrial carrier; adenine nucleotide translocator), member 5 [Source:HGNC Symbol;Acc:HGNC:10991]	protein_coding	1.11236e-11	-0.475267	5.43409e-07	-0.28431	0.0305826	-0.698311	8.19615e-12	0.190957	0.0813421	-0.223044	0.0814565	-0.414001	0.000296737
ENSG00000005059	CCDC109B	coiled-coil domain containing 109B [Source:HGNC Symbol;Acc:HGNC:26076]	protein_coding	5.91509e-13	-1.47825	3.80947e-10	-0.232275	0.548479	-1.39572	5.02031e-08	1.24598	1.23958e-06	0.082536	0.8575	-1.16344	3.34509e-05
ENSG00000005073	HOXA11	homeobox A11 [Source:HGNC Symbol;Acc:HGNC:5101]	protein_coding	5.3703e-30	-3.91761	1.03641e-16	-0.837533	0.0645737	-3.99316	1.98166e-14	3.08007	7.96701e-10	-0.0755528	0.947465	-3.15563	1.41721e-08
ENSG00000005075	POLR2J	polymerase (RNA) II (DNA directed) polypeptide J, 13.3kDa [Source:HGNC Symbol;Acc:HGNC:9197]	protein_coding	0.373999	0.146852	0.238723	0.201775	0.257578	0.0812993	0.577578	0.0549225	0.710433	-0.065553	0.737681	-0.120475	0.446427
ENSG00000005100	DHX33	DEAH (Asp-Glu-Ala-His) box polypeptide 33 [Source:HGNC Symbol;Acc:HGNC:16718]	protein_coding	5.66249e-16	-0.907178	2.92622e-15	-0.43897	0.00361796	-0.746144	2.46842e-09	0.468208	0.000281186	0.161034	0.357188	-0.307174	0.035225
ENSG00000005108	THSD7A	thrombospondin, type I, domain containing 7A [Source:HGNC Symbol;Acc:HGNC:22207]	protein_coding	7.46657e-20	2.33012	3.27623e-16	0.0899513	0.887316	1.6948	7.50715e-08	-2.24017	5.32867e-13	-0.635324	0.094885	1.60485	3.06511e-06
ENSG00000005156	LIG3	ligase III, DNA, ATP-dependent [Source:HGNC Symbol;Acc:HGNC:6600]	protein_coding	6.80043e-05	-0.606393	0.00011438	-0.0582287	0.852286	-0.505265	0.00369188	0.548165	0.00145234	0.101129	0.702665	-0.447036	0.0203629
ENSG00000005175	RPAP3	RNA polymerase II associated protein 3 [Source:HGNC Symbol;Acc:HGNC:26151]	protein_coding	1.69808e-05	-0.415471	2.71916e-05	-0.159728	0.303368	-0.411165	0.000150277	0.255743	0.0215526	0.00430606	0.981605	-0.251437	0.0418912
ENSG00000005187	ACSM3	acyl-CoA synthetase medium-chain family member 3 [Source:HGNC Symbol;Acc:HGNC:10522]	protein_coding	6.0345e-44	-2.30197	1.67398e-33	0.532578	0.0427027	-0.775912	0.000220075	2.83455	8.87252e-44	1.52606	6.16158e-12	-1.30849	3.41484e-09
ENSG00000005189		Putative RNA exonuclease NEF-sp [Source:UniProtKB/Swiss-Prot;Acc:Q96IC2]	protein_coding	1.79691e-49	-2.27535	1.00959e-33	0.0293902	0.937149	-1.82639	1.90059e-20	2.30475	9.85866e-31	0.44897	0.105105	-1.85578	1.05891e-18
ENSG00000005194	CIAPIN1	cytokine induced apoptosis inhibitor 1 [Source:HGNC Symbol;Acc:HGNC:28050]	protein_coding	0.0218602	-0.113656	0.419325	-0.208551	0.297447	-0.413303	0.00357833	-0.0948953	0.547759	-0.299648	0.078845	-0.204752	0.219716
ENSG00000005206	SPPL2B	signal peptide peptidase like 2B [Source:HGNC Symbol;Acc:HGNC:30627]	protein_coding	0.00034488	0.371111	0.000690514	0.186155	0.270803	0.437209	0.000238185	-0.184956	0.140158	0.0660985	0.716841	0.251054	0.0656289
ENSG00000005238	FAM214B	family with sequence similarity 214, member B [Source:HGNC Symbol;Acc:HGNC:25666]	protein_coding	4.91199e-64	1.84974	1.22081e-43	-0.266961	0.20887	0.786602	1.46251e-07	-2.1167	2.10658e-48	-1.06314	6.27909e-12	1.05356	5.73305e-11
ENSG00000005243	COPZ2	coatomer protein complex, subunit zeta 2 [Source:HGNC Symbol;Acc:HGNC:19356]	protein_coding	0.0481213	0.741398	0.236883	0.8714	0.336095	1.63671	0.00862436	0.130001	0.860472	0.895314	0.247282	0.765312	0.281068
ENSG00000005302	MSL3	male-specific lethal 3 homolog (Drosophila) [Source:HGNC Symbol;Acc:HGNC:7370]	protein_coding	0.0113912	0.243702	0.00428141	0.0211206	0.90541	0.0350925	0.748194	-0.222581	0.0174054	-0.208609	0.0604204	0.0139719	0.914731
ENSG00000005339	CREBBP	CREB binding protein [Source:HGNC Symbol;Acc:HGNC:2348]	protein_coding	0.000449323	0.341761	0.000793294	0.0107409	0.964311	0.290808	0.0103225	-0.33102	0.00297692	-0.0509528	0.769075	0.280067	0.0251329
ENSG00000005379	BZRAP1	benzodiazepine receptor (peripheral) associated protein 1 [Source:HGNC Symbol;Acc:HGNC:16831]	protein_coding	3.53513e-13	-4.10411	4.8393e-11	-0.566385	0.388006	-1.46444	0.00212472	3.53773	6.93829e-08	2.63967	0.000535903	-0.898059	0.102026
ENSG00000005421	PON1	paraoxonase 1 [Source:HGNC Symbol;Acc:HGNC:9204]	protein_coding	2.89424e-12	-2.15044	2.96231e-06	1.33347	0.0134769	0.610231	0.205446	3.48391	2.35329e-13	2.76067	1.13877e-07	-0.723244	0.161782
ENSG00000005436	GCFC2	GC-rich sequence DNA-binding factor 2 [Source:HGNC Symbol;Acc:HGNC:1317]	protein_coding	3.84337e-21	-1.21675	8.03889e-17	-0.394614	0.0475354	-1.18131	8.93304e-14	0.822137	3.25829e-07	0.0354447	0.903543	-0.786692	7.55955e-06
ENSG00000005448	WDR54	WD repeat domain 54 [Source:HGNC Symbol;Acc:HGNC:25770]	protein_coding	1.46e-08	-1.26706	5.85912e-07	0.102491	0.84014	-0.950207	0.000718895	1.36956	5.91504e-07	0.316858	0.408443	-1.0527	0.000538973
ENSG00000005469	CROT	carnitine O-octanoyltransferase [Source:HGNC Symbol;Acc:HGNC:2366]	protein_coding	2.28292e-12	-0.717672	1.05541e-08	0.220203	0.250532	-0.00414846	0.979721	0.937874	2.72435e-12	0.713523	1.34548e-06	-0.224351	0.162678
ENSG00000005471	ABCB4	ATP-binding cassette, sub-family B (MDR/TAP), member 4 [Source:HGNC Symbol;Acc:HGNC:45]	protein_coding	8.77239e-15	-2.6687	8.85515e-11	0.354468	0.550946	-1.54628	0.000162936	3.02316	2.57974e-12	1.12241	0.0483149	-1.90075	1.18997e-05
ENSG00000005483	KMT2E	lysine (K)-specific methyltransferase 2E [Source:HGNC Symbol;Acc:HGNC:18541]	protein_coding	0.000460051	0.328176	0.0113706	0.0659225	0.788915	0.50012	0.000320863	-0.262253	0.0692116	0.171944	0.351423	0.434198	0.00471697
ENSG00000005486	RHBDD2	rhomboid domain containing 2 [Source:HGNC Symbol;Acc:HGNC:23082]	protein_coding	0.044457	0.242364	0.00736027	0.0735474	0.6478	0.118845	0.261123	-0.168817	0.0963633	-0.123519	0.338135	0.0452981	0.729527
ENSG00000005513	SOX8	SRY (sex determining region Y)-box 8 [Source:HGNC Symbol;Acc:HGNC:11203]	protein_coding	0.00082469	-0.721719	0.196314	-1.58105	0.0308144	-2.23174	0.000309893	-0.859335	0.174712	-1.51002	0.0431982	-0.650688	0.407812
ENSG00000005700	IBTK	inhibitor of Bruton agammaglobulinemia tyrosine kinase [Source:HGNC Symbol;Acc:HGNC:17853]	protein_coding	2.72851e-07	0.329922	0.00952341	-0.437459	0.00829666	0.0648395	0.686941	-0.767381	8.60542e-09	-0.265083	0.115884	0.502299	0.000792225
ENSG00000005801	ZNF195	zinc finger protein 195 [Source:HGNC Symbol;Acc:HGNC:12986]	protein_coding	0.000304325	-0.346594	0.00948264	-0.287275	0.128193	-0.58692	4.13892e-05	0.0593189	0.72537	-0.240326	0.195246	-0.299645	0.0707063
ENSG00000005810	MYCBP2	MYC binding protein 2, E3 ubiquitin protein ligase [Source:HGNC Symbol;Acc:HGNC:23386]	protein_coding	0.193945	-0.307013	0.0497647	-0.228522	0.340168	-0.12707	0.494272	0.0784907	0.682652	0.179943	0.423903	0.101452	0.638731
ENSG00000005812	FBXL3	F-box and leucine-rich repeat protein 3 [Source:HGNC Symbol;Acc:HGNC:13599]	protein_coding	7.06865e-05	0.337101	0.0393877	-0.396911	0.0793274	0.281318	0.12546	-0.734012	1.98417e-05	-0.055783	0.844053	0.678229	0.00033954
ENSG00000005882	PDK2	pyruvate dehydrogenase kinase, isozyme 2 [Source:HGNC Symbol;Acc:HGNC:8810]	protein_coding	3.88894e-09	0.770428	7.00244e-05	0.760209	0.00253217	1.30537	2.54523e-10	-0.0102198	0.970269	0.534946	0.0315855	0.545166	0.0219501
ENSG00000005884	ITGA3	integrin, alpha 3 (antigen CD49C, alpha 3 subunit of VLA-3 receptor) [Source:HGNC Symbol;Acc:HGNC:6139]	protein_coding	3.18301e-35	0.829395	2.09746e-15	-0.544957	4.09517e-05	0.0470338	0.735748	-1.37435	1.45475e-34	-0.782361	9.75283e-11	0.591991	2.56378e-06
ENSG00000005889	ZFX	zinc finger protein, X-linked [Source:HGNC Symbol;Acc:HGNC:12869]	protein_coding	0.001739	0.104201	0.318434	-0.148113	0.33261	0.253876	0.0178641	-0.252314	0.0188068	0.149675	0.27313	0.401988	0.00041196
ENSG00000005893	LAMP2	lysosomal-associated membrane protein 2 [Source:HGNC Symbol;Acc:HGNC:6501]	protein_coding	0.337121	-0.103958	0.322505	-0.0760888	0.665687	0.0680816	0.574717	0.0278692	0.825779	0.17204	0.200613	0.14417	0.254316
ENSG00000005981	ASB4	ankyrin repeat and SOCS box containing 4 [Source:HGNC Symbol;Acc:HGNC:16009]	protein_coding	7.00575e-67	-2.71277	1.56533e-53	-0.842023	4.7841e-05	-2.34974	2.67921e-36	1.87074	1.84679e-22	0.363021	0.1742	-1.50772	1.95951e-13
ENSG00000006007	GDE1	glycerophosphodiester phosphodiesterase 1 [Source:HGNC Symbol;Acc:HGNC:29644]	protein_coding	3.04443e-23	0.713992	7.23275e-19	0.0853278	0.553539	0.571554	9.57155e-11	-0.628664	7.31087e-13	-0.142438	0.21863	0.486226	4.90651e-07
ENSG00000006015	C19orf60	chromosome 19 open reading frame 60 [Source:HGNC Symbol;Acc:HGNC:26098]	protein_coding	1.57927e-10	-0.827691	3.10143e-07	0.133625	0.644119	-0.690383	0.000103943	0.961316	3.26839e-08	0.137308	0.604092	-0.824008	1.60659e-05
ENSG00000006025	OSBPL7	oxysterol binding protein-like 7 [Source:HGNC Symbol;Acc:HGNC:16387]	protein_coding	0.169372	0.198566	0.166569	0.246903	0.229347	-0.00732339	0.968042	0.0483371	0.782707	-0.205889	0.286679	-0.254227	0.141744
ENSG00000006042	TMEM98	transmembrane protein 98 [Source:HGNC Symbol;Acc:HGNC:24529]	protein_coding	0.0157466	1.12084	0.0704154	1.32516	0.115061	1.94622	0.00226217	0.204319	0.78125	0.825376	0.305094	0.621056	0.40862
ENSG00000006047	YBX2	Y box binding protein 2 [Source:HGNC Symbol;Acc:HGNC:17948]	protein_coding	0.0256717	-0.806629	0.141328	0.811284	0.296917	-0.0937127	0.890542	1.61791	0.00390036	0.712916	0.343865	-0.904997	0.158221
ENSG00000006062	MAP3K14	mitogen-activated protein kinase kinase kinase 14 [Source:HGNC Symbol;Acc:HGNC:6853]	protein_coding	0.019457	0.226995	0.0495958	0.320198	0.0332426	0.299562	0.0157299	0.0932031	0.488358	0.0725673	0.693318	-0.0206358	0.903519
ENSG00000006118	TMEM132A	transmembrane protein 132A [Source:HGNC Symbol;Acc:HGNC:31092]	protein_coding	4.65544e-28	-1.15815	2.26407e-18	-0.0415422	0.881398	-1.15517	1.08638e-15	1.1166	7.21191e-15	0.00297702	0.991608	-1.11363	9.22894e-13
ENSG00000006125	AP2B1	adaptor-related protein complex 2, beta 1 subunit [Source:HGNC Symbol;Acc:HGNC:563]	protein_coding	1.63609e-10	-0.285294	0.00230971	-0.306553	0.013404	-0.683117	4.2703e-12	-0.0212591	0.863261	-0.397822	0.000362886	-0.376563	0.000689449
ENSG00000006194	ZNF263	zinc finger protein 263 [Source:HGNC Symbol;Acc:HGNC:13056]	protein_coding	0.832344	0.0264801	0.832207	0.0815201	0.670817	0.0853844	0.512814	0.0550401	0.680604	0.0589043	0.740865	0.00386425	0.981418
ENSG00000006210	CX3CL1	chemokine (C-X3-C motif) ligand 1 [Source:HGNC Symbol;Acc:HGNC:10647]	protein_coding	0.00175561	0.144086	0.620996	0.137193	0.779777	0.92666	0.000935597	-0.00689288	0.983794	0.782574	0.0150897	0.789467	0.0111149
ENSG00000006282	SPATA20	spermatogenesis associated 20 [Source:HGNC Symbol;Acc:HGNC:26125]	protein_coding	0.00256722	0.254071	0.00413279	0.143017	0.298081	0.317086	0.000975753	-0.111055	0.2823	0.0630148	0.659607	0.17407	0.117585
ENSG00000006327	TNFRSF12A	tumor necrosis factor receptor superfamily, member 12A [Source:HGNC Symbol;Acc:HGNC:18152]	protein_coding	1.42524e-46	0.843256	1.06354e-16	-0.70291	1.2375e-08	-0.103645	0.418437	-1.54617	1.14216e-45	-0.946901	2.39837e-16	0.599265	1.03415e-06
ENSG00000006432	MAP3K9	mitogen-activated protein kinase kinase kinase 9 [Source:HGNC Symbol;Acc:HGNC:6861]	protein_coding	0.504777	-0.166791	0.184934	-0.0325268	0.896001	-0.0359731	0.816988	0.134265	0.340487	0.130818	0.461811	-0.00344622	0.984807
ENSG00000006451	RALA	v-ral simian leukemia viral oncogene homolog A (ras related) [Source:HGNC Symbol;Acc:HGNC:9839]	protein_coding	2.41642e-21	0.931178	3.61175e-15	-0.167036	0.403312	0.429211	0.00141152	-1.09821	1.01528e-17	-0.501967	0.000612397	0.596246	3.39446e-05
ENSG00000006453	BAIAP2L1	BAI1-associated protein 2-like 1 [Source:HGNC Symbol;Acc:HGNC:21649]	protein_coding	3.3548e-78	1.39066	1.47516e-53	-0.160727	0.273942	0.846714	1.5288e-17	-1.55139	9.23058e-57	-0.543949	4.96919e-07	1.00744	3.78189e-21
ENSG00000006459	KDM7A	lysine (K)-specific demethylase 7A [Source:HGNC Symbol;Acc:HGNC:22224]	protein_coding	0.00849673	0.240212	0.282361	-0.227102	0.520998	0.518797	0.0257372	-0.467314	0.0452628	0.278585	0.352551	0.745899	0.00268777
ENSG00000006468	ETV1	ets variant 1 [Source:HGNC Symbol;Acc:HGNC:3490]	protein_coding	4.32124e-13	0.34547	0.0681946	-1.17203	6.84658e-08	-0.302121	0.156583	-1.5175	4.17225e-15	-0.647591	0.00397008	0.869909	6.13733e-05
ENSG00000006530	AGK	acylglycerol kinase [Source:HGNC Symbol;Acc:HGNC:21869]	protein_coding	3.60414e-13	-0.597075	0.000192342	-0.0168402	0.962875	-1.21228	5.35614e-12	0.580234	0.000852917	-0.615209	0.00331895	-1.19544	2.62266e-10
ENSG00000006534	ALDH3B1	aldehyde dehydrogenase 3 family, member B1 [Source:HGNC Symbol;Acc:HGNC:410]	protein_coding	3.71596e-83	1.70079	1.46908e-69	0.534089	1.63118e-05	1.57253	5.75752e-51	-1.1667	1.02372e-28	-0.128257	0.382758	1.03844	7.7911e-20
ENSG00000006555	TTC22	tetratricopeptide repeat domain 22 [Source:HGNC Symbol;Acc:HGNC:26067]	protein_coding	2.0035e-149	1.91599	2.41869e-107	0.313144	0.0108165	1.84169	2.99208e-85	-1.60285	3.61102e-65	-0.0743006	0.600758	1.52855	1.46424e-51
ENSG00000006576	PHTF2	putative homeodomain transcription factor 2 [Source:HGNC Symbol;Acc:HGNC:13411]	protein_coding	1.60232e-07	-0.626662	4.96801e-08	-0.384144	0.0125159	-0.487672	0.000117523	0.242518	0.0687691	0.13899	0.430802	-0.103528	0.524033
ENSG00000006607	FARP2	FERM, RhoGEF and pleckstrin domain protein 2 [Source:HGNC Symbol;Acc:HGNC:16460]	protein_coding	1.67806e-13	0.483773	9.40193e-09	0.106669	0.457303	0.590914	8.9869e-11	-0.377104	4.75517e-05	0.10714	0.395352	0.484245	1.26733e-06
ENSG00000006611	USH1C	Usher syndrome 1C (autosomal recessive, severe) [Source:HGNC Symbol;Acc:HGNC:12597]	protein_coding	2.06535e-11	0.526976	8.63626e-12	0.175348	0.128034	0.381151	8.42497e-06	-0.351627	3.74824e-05	-0.145824	0.181997	0.205803	0.0354442
ENSG00000006625	GGCT	gamma-glutamylcyclotransferase [Source:HGNC Symbol;Acc:HGNC:21705]	protein_coding	2.2775e-99	-2.30967	1.50667e-71	-0.114197	0.622027	-1.99478	8.67468e-47	2.19547	4.66228e-56	0.314892	0.0880654	-1.88058	1.95998e-36
ENSG00000006634	DBF4	DBF4 zinc finger [Source:HGNC Symbol;Acc:HGNC:17364]	protein_coding	4.73528e-47	-1.63175	2.08205e-31	-0.543878	0.00295365	-1.86186	3.3847e-34	1.08787	1.41028e-12	-0.230116	0.285226	-1.31798	2.77711e-15
ENSG00000006652	IFRD1	interferon-related developmental regulator 1 [Source:HGNC Symbol;Acc:HGNC:5456]	protein_coding	6.83215e-29	0.845518	2.96039e-19	0.0395781	0.841773	0.811495	1.54835e-15	-0.80594	3.15968e-15	-0.0340227	0.84079	0.771917	2.73169e-12
ENSG00000006695	COX10	COX10 heme A:farnesyltransferase cytochrome c oxidase assembly factor [Source:HGNC Symbol;Acc:HGNC:2260]	protein_coding	4.55479e-10	-0.754752	3.10594e-07	0.0486158	0.867223	-0.670599	3.14495e-05	0.803367	4.14322e-07	0.0841526	0.746606	-0.719215	3.45622e-05
ENSG00000006704	GTF2IRD1	GTF2I repeat domain containing 1 [Source:HGNC Symbol;Acc:HGNC:4661]	protein_coding	0.00113564	-0.430576	0.00618883	0.133663	0.626183	0.115506	0.547603	0.564239	0.000807821	0.546082	0.00426035	-0.018157	0.938217
ENSG00000006712	PAF1	Paf1, RNA polymerase II associated factor, homolog (S. cerevisiae) [Source:HGNC Symbol;Acc:HGNC:25459]	protein_coding	0.063215	0.064215	0.658486	0.208376	0.291284	-0.172373	0.252179	0.144161	0.338943	-0.236588	0.17764	-0.380749	0.0139455
ENSG00000006715	VPS41	vacuolar protein sorting 41 homolog (S. cerevisiae) [Source:HGNC Symbol;Acc:HGNC:12713]	protein_coding	0.280987	0.0486732	0.727853	-0.0482651	0.841215	0.198478	0.157239	-0.0969383	0.511573	0.149805	0.397596	0.246743	0.10521
ENSG00000006744	ELAC2	elaC ribonuclease Z 2 [Source:HGNC Symbol;Acc:HGNC:14198]	protein_coding	2.25237e-08	-0.433794	2.60484e-05	-0.108197	0.541918	-0.590053	1.21008e-07	0.325597	0.00440448	-0.156259	0.297447	-0.481856	8.70259e-05
ENSG00000006747	SCIN	scinderin [Source:HGNC Symbol;Acc:HGNC:21695]	protein_coding	4.91221e-24	1.12771	3.65203e-12	0.537094	0.0165241	1.71796	6.06345e-23	-0.590617	0.00113303	0.59025	0.00377162	1.18087	6.30099e-10
ENSG00000006756	ARSD	arylsulfatase D [Source:HGNC Symbol;Acc:HGNC:717]	protein_coding	0.0280454	0.0299803	0.771639	0.228929	0.0641154	0.192736	0.0555414	0.198948	0.0452372	0.162756	0.182611	-0.0361926	0.784089
ENSG00000006757	PNPLA4	patatin-like phospholipase domain containing 4 [Source:HGNC Symbol;Acc:HGNC:24887]	protein_coding	2.23597e-05	-0.652313	0.000249295	0.198711	0.482818	-0.00924947	0.968042	0.851024	6.42928e-06	0.643064	0.00337418	-0.20796	0.360498
ENSG00000006831	ADIPOR2	adiponectin receptor 2 [Source:HGNC Symbol;Acc:HGNC:24041]	protein_coding	1.16942e-42	1.02364	1.32132e-30	-0.110079	0.48143	0.53204	8.03586e-08	-1.13372	6.26812e-32	-0.491597	4.51293e-06	0.64212	1.90931e-09
ENSG00000006837	CDKL3	cyclin-dependent kinase-like 3 [Source:HGNC Symbol;Acc:HGNC:15483]	protein_coding	0.940996	-0.113892	0.904632	0.370431	0.803109	0.130769	0.899943	0.484323	0.616084	0.244661	0.863251	-0.239662	0.836825
ENSG00000007047	MARK4	MAP/microtubule affinity-regulating kinase 4 [Source:HGNC Symbol;Acc:HGNC:13538]	protein_coding	0.00207691	0.488469	0.00332436	0.188787	0.496924	0.574011	0.00145663	-0.299682	0.11004	0.0855412	0.757765	0.385224	0.0588281
ENSG00000007062	PROM1	prominin 1 [Source:HGNC Symbol;Acc:HGNC:9454]	protein_coding	1.58872e-08	-1.05002	0.000939754	0.996255	0.0173624	-0.0355669	0.932795	2.04628	8.37448e-10	1.01445	0.0103524	-1.03182	0.00630776
ENSG00000007080	CCDC124	coiled-coil domain containing 124 [Source:HGNC Symbol;Acc:HGNC:25171]	protein_coding	0.000138703	-0.197958	0.180008	0.0141226	0.965222	-0.607957	6.07409e-05	0.21208	0.187614	-0.409999	0.0217372	-0.622079	0.000160935
ENSG00000007168	PAFAH1B1	platelet-activating factor acetylhydrolase 1b, regulatory subunit 1 (45kDa) [Source:HGNC Symbol;Acc:HGNC:8574]	protein_coding	2.81459e-09	0.355972	0.000316533	-0.259031	0.0620265	0.295301	0.00735337	-0.615003	5.09666e-09	-0.0606712	0.712812	0.554332	1.59127e-06
ENSG00000007202	KIAA0100	KIAA0100 [Source:HGNC Symbol;Acc:HGNC:28960]	protein_coding	0.020761	-0.172377	0.00898826	-0.0899002	0.391526	-0.176344	0.0151902	0.082477	0.281375	-0.00396685	0.973055	-0.0864439	0.315614
ENSG00000007237	GAS7	growth arrest-specific 7 [Source:HGNC Symbol;Acc:HGNC:4169]	protein_coding	3.79552e-10	-1.48706	2.61507e-08	-0.24609	0.585568	-1.39748	1.53124e-06	1.24097	2.13449e-05	0.0895814	0.862208	-1.15139	0.00031902
ENSG00000007255	TRAPPC6A	trafficking protein particle complex 6A [Source:HGNC Symbol;Acc:HGNC:23069]	protein_coding	1.29623e-05	-0.507782	0.0112233	0.430524	0.117551	0.318038	0.154879	0.938306	6.81633e-06	0.82582	0.000425387	-0.112486	0.683797
ENSG00000007306	CEACAM7	carcinoembryonic antigen-related cell adhesion molecule 7 [Source:HGNC Symbol;Acc:HGNC:1819]	protein_coding	0.00675411	-1.81088	0.0772566	1.51639	0.29111	-0.852275	0.464067	3.32728	0.00159308	0.958609	0.531035	-2.36867	0.0412327
ENSG00000007341	ST7L	suppression of tumorigenicity 7 like [Source:HGNC Symbol;Acc:HGNC:18441]	protein_coding	0.000125484	-0.181055	0.200589	-0.100829	0.670817	-0.631353	1.64431e-05	0.0802258	0.629622	-0.450298	0.00890612	-0.530524	0.000990431
ENSG00000007376	RPUSD1	RNA pseudouridylate synthase domain containing 1 [Source:HGNC Symbol;Acc:HGNC:14173]	protein_coding	9.65752e-05	-0.528065	0.000168494	-0.0697739	0.795887	-0.468983	0.00250034	0.458291	0.00297561	0.0590816	0.811235	-0.399209	0.0205544
ENSG00000007384	RHBDF1	rhomboid 5 homolog 1 (Drosophila) [Source:HGNC Symbol;Acc:HGNC:20561]	protein_coding	1.04241e-106	1.41997	3.74444e-79	-0.0291933	0.857096	0.808646	2.16649e-22	-1.44917	2.74606e-70	-0.611326	2.18434e-12	0.837839	9.37971e-21
ENSG00000007392	LUC7L	LUC7-like (S. cerevisiae) [Source:HGNC Symbol;Acc:HGNC:6723]	protein_coding	0.247239	0.113879	0.286731	0.000241276	0.999245	0.178383	0.117543	-0.113638	0.334312	0.0645038	0.693829	0.178141	0.158108
ENSG00000007516	BAIAP3	BAI1-associated protein 3 [Source:HGNC Symbol;Acc:HGNC:948]	protein_coding	4.77679e-32	1.43217	3.52623e-27	0.139951	0.559206	0.910034	5.36312e-10	-1.29222	3.09813e-19	-0.522133	0.00174378	0.770083	1.62558e-06
ENSG00000007520	TSR3	TSR3, 20S rRNA accumulation, homolog (S. cerevisiae) [Source:HGNC Symbol;Acc:HGNC:14175]	protein_coding	0.824935	0.0762784	0.667599	0.146329	0.589133	0.0301609	0.885424	0.0700506	0.722882	-0.0461175	0.870781	-0.116168	0.594716
ENSG00000007541	PIGQ	phosphatidylinositol glycan anchor biosynthesis, class Q [Source:HGNC Symbol;Acc:HGNC:14135]	protein_coding	0.091695	-0.0897423	0.481177	0.20003	0.25182	-0.045354	0.75988	0.289772	0.0229755	0.0443883	0.826468	-0.245384	0.0877166
ENSG00000007545	CRAMP1L	Crm, cramped-like (Drosophila) [Source:HGNC Symbol;Acc:HGNC:14122]	protein_coding	0.000101194	0.359249	0.00122492	0.169101	0.335309	0.488101	4.28037e-05	-0.190148	0.132738	0.128852	0.431264	0.319	0.0176021
ENSG00000007866	TEAD3	TEA domain family member 3 [Source:HGNC Symbol;Acc:HGNC:11716]	protein_coding	4.63351e-36	1.05437	1.26318e-33	0.362012	0.00203564	0.831003	2.9834e-18	-0.692361	3.23539e-13	-0.22337	0.0575812	0.468991	8.99197e-06
ENSG00000007923	DNAJC11	DnaJ (Hsp40) homolog, subfamily C, member 11 [Source:HGNC Symbol;Acc:HGNC:25570]	protein_coding	1.60099e-18	-0.572349	3.39481e-09	-0.103463	0.536247	-0.840284	1.09809e-15	0.468887	1.00692e-05	-0.267935	0.0396633	-0.736821	1.03811e-10
ENSG00000007944	MYLIP	myosin regulatory light chain interacting protein [Source:HGNC Symbol;Acc:HGNC:21155]	protein_coding	0.000362456	0.0875909	0.67276	0.242813	0.404006	0.730121	0.000158962	0.155222	0.477564	0.64253	0.00338936	0.487308	0.0251308
ENSG00000007968	E2F2	E2F transcription factor 2 [Source:HGNC Symbol;Acc:HGNC:3114]	protein_coding	1.03448e-27	-2.94731	1.54e-23	-0.0458548	0.941188	-2.00087	1.32495e-10	2.90145	4.81403e-20	0.946439	0.0164784	-1.95501	6.72814e-09
ENSG00000008018	PSMB1	proteasome (prosome, macropain) subunit, beta type, 1 [Source:HGNC Symbol;Acc:HGNC:9537]	protein_coding	0.000336457	-0.212873	0.0292652	-0.127466	0.410701	-0.426025	3.61668e-05	0.0854072	0.459122	-0.213151	0.0941079	-0.298558	0.00994873
ENSG00000008083	JARID2	jumonji, AT rich interactive domain 2 [Source:HGNC Symbol;Acc:HGNC:6196]	protein_coding	0.153666	-0.268658	0.271549	0.177541	0.662406	-0.30561	0.254756	0.446199	0.0818778	-0.0369518	0.931718	-0.483151	0.0892485
ENSG00000008086	CDKL5	cyclin-dependent kinase-like 5 [Source:HGNC Symbol;Acc:HGNC:11411]	protein_coding	0.000158012	0.44576	0.0026103	0.390029	0.0539381	0.663205	2.4535e-05	-0.0557312	0.766398	0.217446	0.292755	0.273177	0.136817
ENSG00000008128	CDK11A	cyclin-dependent kinase 11A [Source:HGNC Symbol;Acc:HGNC:1730]	protein_coding	0.00907579	0.389888	0.000898943	0.195155	0.283135	0.209633	0.1227	-0.194733	0.147074	-0.180255	0.279441	0.014478	0.935033
ENSG00000008130	NADK	NAD kinase [Source:HGNC Symbol;Acc:HGNC:29831]	protein_coding	5.2955e-11	0.649955	1.69593e-09	0.00119687	0.99705	0.404809	0.000832112	-0.648758	3.2423e-08	-0.245146	0.095695	0.403612	0.0023229
ENSG00000008226	DLEC1	deleted in lung and esophageal cancer 1 [Source:HGNC Symbol;Acc:HGNC:2899]	protein_coding	0.0700159	1.75208	0.0149509	1.59143	0.110334	1.26745	0.12187	-0.160655	0.849336	-0.484627	0.652223	-0.323972	0.73724
ENSG00000008256	CYTH3	cytohesin 3 [Source:HGNC Symbol;Acc:HGNC:9504]	protein_coding	0.290422	0.186972	0.123868	0.112697	0.572705	0.202883	0.128079	-0.0742748	0.603984	0.0159115	0.942025	0.0901863	0.575358
ENSG00000008282	SYPL1	synaptophysin-like 1 [Source:HGNC Symbol;Acc:HGNC:11507]	protein_coding	3.79955e-10	-0.67498	2.17469e-09	-0.346181	0.0269963	-0.645444	1.74665e-07	0.328799	0.010036	0.0295361	0.889729	-0.299263	0.0360105
ENSG00000008283	CYB561	cytochrome b561 [Source:HGNC Symbol;Acc:HGNC:2571]	protein_coding	0.249658	-0.0117364	0.904455	0.101327	0.446099	-0.0806033	0.40987	0.113064	0.228785	-0.0688668	0.58734	-0.18193	0.0707063
ENSG00000008294	SPAG9	sperm associated antigen 9 [Source:HGNC Symbol;Acc:HGNC:14524]	protein_coding	0.000202338	0.336618	0.0326806	-0.303164	0.185476	0.324678	0.0634447	-0.639782	0.000113924	-0.0119402	0.966538	0.627842	0.00057663
ENSG00000008300	CELSR3	cadherin, EGF LAG seven-pass G-type receptor 3 [Source:HGNC Symbol;Acc:HGNC:3230]	protein_coding	6.85093e-07	0.0588196	0.825159	0.678207	0.0234087	1.09144	4.28945e-06	0.619387	0.0119514	1.03262	8.20204e-05	0.413237	0.13791
ENSG00000008311	AASS	aminoadipate-semialdehyde synthase [Source:HGNC Symbol;Acc:HGNC:17366]	protein_coding	0.640354	-0.372821	0.562761	0.388727	0.705028	0.108221	0.885796	0.761547	0.249884	0.481041	0.594681	-0.280506	0.730312
ENSG00000008323	PLEKHG6	pleckstrin homology domain containing, family G (with RhoGef domain) member 6 [Source:HGNC Symbol;Acc:HGNC:25562]	protein_coding	1.38529e-28	1.28983	2.62073e-23	0.397746	0.0306452	1.26139	3.5492e-19	-0.89208	3.11944e-10	-0.0284341	0.909091	0.863646	2.38599e-08
ENSG00000008324	SS18L2	synovial sarcoma translocation gene on chromosome 18-like 2 [Source:HGNC Symbol;Acc:HGNC:15593]	protein_coding	0.289796	-0.259162	0.0689914	-0.107965	0.659668	-0.0980961	0.564579	0.151196	0.354805	0.161065	0.431321	0.00986907	0.962386
ENSG00000008382	MPND	MPN domain containing [Source:HGNC Symbol;Acc:HGNC:25934]	protein_coding	7.89208e-08	-0.424923	0.00625312	0.494747	0.0112163	-0.107654	0.568692	0.91967	8.8739e-09	0.317269	0.128125	-0.602401	0.000652023
ENSG00000008394	MGST1	microsomal glutathione S-transferase 1 [Source:HGNC Symbol;Acc:HGNC:7061]	protein_coding	2.42443e-20	-1.4002	6.77722e-15	-0.194024	0.538956	-1.39555	1.07021e-12	1.20618	7.8357e-10	0.00465086	0.990139	-1.20152	1.99996e-08
ENSG00000008405	CRY1	cryptochrome circadian clock 1 [Source:HGNC Symbol;Acc:HGNC:2384]	protein_coding	7.58013e-20	0.676601	2.15617e-08	-0.555638	0.000467384	0.19219	0.186734	-1.23224	4.4747e-21	-0.48441	0.00120146	0.747829	2.85067e-07
ENSG00000008441	NFIX	nuclear factor I/X (CCAAT-binding transcription factor) [Source:HGNC Symbol;Acc:HGNC:7788]	protein_coding	8.80754e-18	-1.38535	2.32068e-14	0.0509265	0.891228	-0.907548	4.1602e-06	1.43627	1.9342e-13	0.477798	0.0549183	-0.958475	6.79528e-06
ENSG00000008513	ST3GAL1	ST3 beta-galactoside alpha-2,3-sialyltransferase 1 [Source:HGNC Symbol;Acc:HGNC:10862]	protein_coding	3.11169e-80	1.38863	4.19227e-35	-0.847327	4.0483e-10	0.162874	0.239597	-2.23596	3.33493e-76	-1.22576	5.45598e-22	1.0102	4.36354e-14
ENSG00000008516	MMP25	matrix metallopeptidase 25 [Source:HGNC Symbol;Acc:HGNC:14246]	protein_coding	0.00121175	1.89527	0.000146093	1.34997	0.0504367	1.57514	0.0042594	-0.545293	0.31119	-0.320129	0.666901	0.225164	0.738446
ENSG00000008517	IL32	interleukin 32 [Source:HGNC Symbol;Acc:HGNC:16830]	protein_coding	7.0262e-18	1.91944	7.87936e-18	0.538828	0.104885	1.3597	3.44486e-08	-1.38061	1.55995e-08	-0.559733	0.0626599	0.820877	0.00300559
ENSG00000008710	PKD1	polycystic kidney disease 1 (autosomal dominant) [Source:HGNC Symbol;Acc:HGNC:9008]	protein_coding	0.0155706	-0.283072	0.112814	0.251188	0.353287	0.159618	0.44098	0.53426	0.00415452	0.44269	0.0445198	-0.0915705	0.710786
ENSG00000008838	MED24	mediator complex subunit 24 [Source:HGNC Symbol;Acc:HGNC:22963]	protein_coding	0.00147241	-0.159661	0.093209	0.115454	0.437486	-0.238783	0.019145	0.275115	0.0057904	-0.0791216	0.58195	-0.354237	0.00103791
ENSG00000008853	RHOBTB2	Rho-related BTB domain containing 2 [Source:HGNC Symbol;Acc:HGNC:18756]	protein_coding	0.917075	0.0419283	0.872245	-0.000232027	0.999851	-0.118357	0.670073	-0.0421603	0.88412	-0.160285	0.652217	-0.118125	0.70877
ENSG00000008869	HEATR5B	HEAT repeat containing 5B [Source:HGNC Symbol;Acc:HGNC:29273]	protein_coding	3.86619e-17	0.568125	6.38663e-11	-0.00453273	0.983722	0.586781	5.36339e-10	-0.572658	1.37236e-09	0.0186565	0.909664	0.591314	8.60444e-09
ENSG00000008952	SEC62	SEC62 homolog (S. cerevisiae) [Source:HGNC Symbol;Acc:HGNC:11846]	protein_coding	0.110586	0.153692	0.0827585	-0.0325481	0.848631	0.112513	0.263313	-0.18624	0.0514835	-0.0411787	0.778133	0.145061	0.185234
ENSG00000008988	RPS20	ribosomal protein S20 [Source:HGNC Symbol;Acc:HGNC:10405]	protein_coding	5.13139e-07	-0.542402	1.66319e-05	0.0620358	0.802027	-0.432626	0.00204114	0.604438	9.67933e-06	0.109776	0.583495	-0.494662	0.00112856
ENSG00000009307	CSDE1	cold shock domain containing E1, RNA-binding [Source:HGNC Symbol;Acc:HGNC:29905]	protein_coding	0.194556	0.0295006	0.765255	-0.149263	0.252131	-0.0777168	0.45464	-0.178764	0.0624259	-0.107217	0.38889	0.0715464	0.54596
ENSG00000009335	UBE3C	ubiquitin protein ligase E3C [Source:HGNC Symbol;Acc:HGNC:16803]	protein_coding	2.45998e-10	-0.345278	5.9835e-06	-0.34705	0.000326273	-0.51993	2.43131e-10	-0.00177203	0.986413	-0.174651	0.0924253	-0.172879	0.0754371
ENSG00000009413	REV3L	REV3-like, polymerase (DNA directed), zeta, catalytic subunit [Source:HGNC Symbol;Acc:HGNC:9968]	protein_coding	7.99417e-09	-0.950587	2.22674e-09	-0.182608	0.499699	-0.56029	0.00160228	0.76798	1.07759e-05	0.390298	0.070536	-0.377682	0.0609746
ENSG00000009694	TENM1	teneurin transmembrane protein 1 [Source:HGNC Symbol;Acc:HGNC:8117]	protein_coding	1.07948e-11	-1.21013	2.2377e-08	0.178068	0.634021	-0.902837	0.000129467	1.3882	1.98414e-09	0.307296	0.349327	-1.0809	1.82601e-05
ENSG00000009709	PAX7	paired box 7 [Source:HGNC Symbol;Acc:HGNC:8621]	protein_coding	1.70023e-14	-3.60891	5.21639e-09	-0.282011	0.72666	-3.28384	2.239e-07	3.3269	3.01239e-07	0.325065	0.798068	-3.00183	8.45189e-06
ENSG00000009765	IYD	iodotyrosine deiodinase [Source:HGNC Symbol;Acc:HGNC:21071]	protein_coding	3.41329e-17	0.609024	0.000181566	0.396412	0.0865967	1.42962	4.60502e-17	-0.212612	0.265995	0.820593	1.34306e-05	1.03321	3.06924e-08
ENSG00000009780	FAM76A	family with sequence similarity 76, member A [Source:HGNC Symbol;Acc:HGNC:28530]	protein_coding	0.226785	-0.0786148	0.692511	0.097146	0.763718	0.280735	0.155944	0.175761	0.393256	0.35935	0.120276	0.183589	0.424264
ENSG00000009830	POMT2	protein-O-mannosyltransferase 2 [Source:HGNC Symbol;Acc:HGNC:19743]	protein_coding	0.0657548	0.180606	0.176964	0.00573534	0.985683	-0.178199	0.233302	-0.174871	0.234919	-0.358805	0.0267697	-0.183935	0.267517
ENSG00000009844	VTA1	vesicle (multivesicular body) trafficking 1 [Source:HGNC Symbol;Acc:HGNC:20954]	protein_coding	0.285397	-0.0737755	0.573111	-0.195622	0.277159	-0.197339	0.144776	-0.121846	0.382813	-0.123564	0.484045	-0.00171742	0.992369
ENSG00000009950	MLXIPL	MLX interacting protein-like [Source:HGNC Symbol;Acc:HGNC:12744]	protein_coding	8.59762e-25	-1.50044	2.3267e-18	0.4172	0.0957988	-0.226261	0.280069	1.91764	2.92458e-25	1.27418	1.61725e-10	-0.643461	0.00227442
ENSG00000009954	BAZ1B	bromodomain adjacent to zinc finger domain, 1B [Source:HGNC Symbol;Acc:HGNC:961]	protein_coding	1.53186e-13	-0.679907	1.52159e-13	-0.204699	0.135835	-0.4887	1.51277e-06	0.475208	2.83592e-06	0.191207	0.138921	-0.284001	0.0139766
ENSG00000010017	RANBP9	RAN binding protein 9 [Source:HGNC Symbol;Acc:HGNC:13727]	protein_coding	0.00659542	-0.160514	0.170103	-0.310546	0.0398888	-0.36454	0.00282512	-0.150032	0.247639	-0.204026	0.184732	-0.0539943	0.741579
ENSG00000010030	ETV7	ets variant 7 [Source:HGNC Symbol;Acc:HGNC:18160]	protein_coding	0.10087	0.457328	0.102988	0.548297	0.155592	0.628535	0.0352684	0.090969	0.789131	0.171207	0.69398	0.0802376	0.838742
ENSG00000010072	SPRTN	SprT-like N-terminal domain [Source:HGNC Symbol;Acc:HGNC:25356]	protein_coding	0.117053	-0.315007	0.114187	-0.310014	0.291793	-0.450059	0.0364133	0.00499232	0.984186	-0.135052	0.668524	-0.140045	0.604729
ENSG00000010165	METTL13	methyltransferase like 13 [Source:HGNC Symbol;Acc:HGNC:24248]	protein_coding	1.25818e-13	-0.657734	2.43947e-13	-0.166828	0.220933	-0.464638	2.29584e-06	0.490906	6.3251e-07	0.193096	0.12774	-0.29781	0.00724576
ENSG00000010219	DYRK4	dual-specificity tyrosine-(Y)-phosphorylation regulated kinase 4 [Source:HGNC Symbol;Acc:HGNC:3095]	protein_coding	2.76091e-21	-1.69546	4.64953e-16	0.0519345	0.898362	-1.1958	5.96318e-08	1.7474	4.3398e-15	0.499659	0.0947972	-1.24774	1.39669e-07
ENSG00000010244	ZNF207	zinc finger protein 207 [Source:HGNC Symbol;Acc:HGNC:12998]	protein_coding	0.000212935	0.0309944	0.756347	-0.245273	0.037412	-0.286775	0.00250034	-0.276267	0.00337477	-0.317769	0.00251577	-0.0415022	0.744214
ENSG00000010256	UQCRC1	ubiquinol-cytochrome c reductase core protein I [Source:HGNC Symbol;Acc:HGNC:12585]	protein_coding	0.529391	-0.0360678	0.780338	0.103751	0.592949	-0.0678303	0.627839	0.139819	0.283022	-0.0317626	0.87509	-0.171581	0.233538
ENSG00000010270	STARD3NL	STARD3 N-terminal like [Source:HGNC Symbol;Acc:HGNC:19169]	protein_coding	0.810163	0.0436542	0.718905	-0.037775	0.857193	-0.0548084	0.682387	-0.0814292	0.525745	-0.0984626	0.545738	-0.0170334	0.915785
ENSG00000010278	CD9	CD9 molecule [Source:HGNC Symbol;Acc:HGNC:1709]	protein_coding	0.0984436	-0.112468	0.433534	-0.119711	0.603725	-0.34718	0.0176281	-0.00724337	0.968317	-0.234712	0.194109	-0.227469	0.176051
ENSG00000010292	NCAPD2	non-SMC condensin I complex, subunit D2 [Source:HGNC Symbol;Acc:HGNC:24305]	protein_coding	1.20077e-69	-1.69448	2.68162e-49	-0.175707	0.352393	-1.58262	5.48188e-37	1.51878	3.03729e-34	0.111861	0.553927	-1.40691	1.38268e-25
ENSG00000010295	IFFO1	intermediate filament family orphan 1 [Source:HGNC Symbol;Acc:HGNC:24970]	protein_coding	0.00653368	1.51501	0.00319294	0.0459209	0.971245	0.685299	0.266351	-1.46909	0.00905727	-0.829716	0.23374	0.639378	0.357485
ENSG00000010310	GIPR	gastric inhibitory polypeptide receptor [Source:HGNC Symbol;Acc:HGNC:4271]	protein_coding	3.51987e-129	3.02309	7.63103e-101	0.314497	0.158166	2.62836	1.72101e-65	-2.7086	5.56138e-70	-0.394732	0.0348558	2.31386	1.58577e-44
ENSG00000010318	PHF7	PHD finger protein 7 [Source:HGNC Symbol;Acc:HGNC:18458]	protein_coding	0.000884894	-0.787501	0.00193279	0.154602	0.729154	-0.455764	0.109186	0.942103	0.000498056	0.331736	0.377356	-0.610367	0.0436805
ENSG00000010322	NISCH	nischarin [Source:HGNC Symbol;Acc:HGNC:18006]	protein_coding	0.000233024	0.0324914	0.754649	0.311658	0.00742664	0.295564	0.0024977	0.279166	0.00415865	0.263073	0.0198186	-0.0160935	0.906486
ENSG00000010361	FUZ	fuzzy planar cell polarity protein [Source:HGNC Symbol;Acc:HGNC:26219]	protein_coding	0.047627	0.0491049	0.816578	0.402947	0.116069	0.390438	0.0545141	0.353842	0.0808385	0.341333	0.164435	-0.0125093	0.963573
ENSG00000010404	IDS	iduronate 2-sulfatase [Source:HGNC Symbol;Acc:HGNC:5389]	protein_coding	1.91897e-07	0.66421	0.000462922	-0.410788	0.137992	0.487808	0.0223172	-1.075	1.05916e-07	-0.176402	0.549822	0.898596	5.89361e-05
ENSG00000010539	ZNF200	zinc finger protein 200 [Source:HGNC Symbol;Acc:HGNC:12993]	protein_coding	0.456917	-0.107316	0.394888	-0.133626	0.484696	-0.184605	0.169388	-0.02631	0.863261	-0.0772884	0.687642	-0.0509784	0.76565
ENSG00000010626	LRRC23	leucine rich repeat containing 23 [Source:HGNC Symbol;Acc:HGNC:19138]	protein_coding	0.0941653	0.187452	0.339973	0.467245	0.0565508	0.228691	0.283575	0.279793	0.171811	0.0412392	0.902175	-0.238554	0.30664
ENSG00000010704	HFE	hemochromatosis [Source:HGNC Symbol;Acc:HGNC:4886]	protein_coding	0.0646513	-0.146337	0.185177	0.137432	0.40797	-0.0696092	0.591648	0.283769	0.0129951	0.0767278	0.65176	-0.207041	0.111146
ENSG00000010803	SCMH1	sex comb on midleg homolog 1 (Drosophila) [Source:HGNC Symbol;Acc:HGNC:19003]	protein_coding	0.317524	-0.131238	0.317497	0.10552	0.618524	0.000375253	0.99813	0.236758	0.0832959	0.131613	0.471958	-0.105145	0.526374
ENSG00000010810	FYN	FYN proto-oncogene, Src family tyrosine kinase [Source:HGNC Symbol;Acc:HGNC:4037]	protein_coding	0.0021299	-1.1978	0.00146751	0.194254	0.7776	-0.330813	0.457909	1.39206	0.000564819	0.86699	0.0823557	-0.525067	0.269934
ENSG00000010818	HIVEP2	human immunodeficiency virus type I enhancer binding protein 2 [Source:HGNC Symbol;Acc:HGNC:4921]	protein_coding	3.33714e-14	1.0106	8.28347e-10	-0.168917	0.566017	0.768907	2.51172e-05	-1.17951	3.77239e-11	-0.241692	0.317012	0.937823	1.87228e-06
ENSG00000011007	TCEB3	transcription elongation factor B (SIII), polypeptide 3 (110kDa, elongin A) [Source:HGNC Symbol;Acc:HGNC:11620]	protein_coding	1.12973e-06	0.179682	0.0441625	-0.308065	0.00699757	-0.120766	0.239057	-0.487747	1.35489e-07	-0.300448	0.00522093	0.187299	0.0879536
ENSG00000011009	LYPLA2	lysophospholipase II [Source:HGNC Symbol;Acc:HGNC:6738]	protein_coding	1.39699e-21	0.837343	3.48747e-15	-0.113386	0.550482	0.109104	0.41498	-0.95073	1.52731e-16	-0.728239	4.20062e-09	0.22249	0.110857
ENSG00000011021	CLCN6	chloride channel, voltage-sensitive 6 [Source:HGNC Symbol;Acc:HGNC:2024]	protein_coding	0.00159042	0.40719	0.000586087	0.0335739	0.892515	0.218747	0.109999	-0.373616	0.00399077	-0.188443	0.259974	0.185173	0.229263
ENSG00000011028	MRC2	mannose receptor, C type 2 [Source:HGNC Symbol;Acc:HGNC:16875]	protein_coding	0.179482	-0.422526	0.317706	0.236991	0.730932	-0.58812	0.202368	0.659517	0.132949	-0.165594	0.816331	-0.825111	0.0892156
ENSG00000011052	NME2	NME/NM23 nucleoside diphosphate kinase 2 [Source:HGNC Symbol;Acc:HGNC:7850]	protein_coding	3.55224e-07	-1.31285	0.000300215	-0.372017	0.547161	-2.06947	1.79641e-07	0.940836	0.0201921	-0.756613	0.138226	-1.69745	9.86578e-05
ENSG00000011105	TSPAN9	tetraspanin 9 [Source:HGNC Symbol;Acc:HGNC:21640]	protein_coding	0.948311	0.0739207	0.653022	0.0669503	0.810654	0.023685	0.902411	-0.00697033	0.972348	-0.0502356	0.845955	-0.0432653	0.841752
ENSG00000011114	BTBD7	BTB (POZ) domain containing 7 [Source:HGNC Symbol;Acc:HGNC:18269]	protein_coding	0.489592	-0.0452131	0.744232	-0.134999	0.501823	0.0676772	0.654957	-0.0897864	0.540529	0.11289	0.539385	0.202677	0.186886
ENSG00000011132	APBA3	amyloid beta (A4) precursor protein-binding, family A, member 3 [Source:HGNC Symbol;Acc:HGNC:580]	protein_coding	0.437658	0.118162	0.431597	0.226503	0.276784	0.153496	0.346354	0.108341	0.512437	0.0353335	0.887685	-0.0730071	0.709909
ENSG00000011143	MKS1	Meckel syndrome, type 1 [Source:HGNC Symbol;Acc:HGNC:7121]	protein_coding	0.000170834	-0.399901	0.00392672	0.165714	0.453791	0.132196	0.417665	0.565614	0.000119361	0.532097	0.00135965	-0.0335171	0.868832
ENSG00000011198	ABHD5	abhydrolase domain containing 5 [Source:HGNC Symbol;Acc:HGNC:21396]	protein_coding	2.48033e-13	0.639334	2.17258e-09	-0.157339	0.378941	0.329346	0.00693351	-0.796674	6.4383e-12	-0.309988	0.0258871	0.486686	0.000188023
ENSG00000011243	AKAP8L	A kinase (PRKA) anchor protein 8-like [Source:HGNC Symbol;Acc:HGNC:29857]	protein_coding	8.85798e-11	0.5147	1.91141e-09	0.26597	0.024954	0.547846	3.98991e-09	-0.248731	0.00998926	0.033145	0.829127	0.281876	0.00764942
ENSG00000011258	MBTD1	mbt domain containing 1 [Source:HGNC Symbol;Acc:HGNC:19866]	protein_coding	0.10829	0.0561014	0.759107	0.0408394	0.900509	0.367954	0.0368847	-0.015262	0.944419	0.311852	0.142631	0.327114	0.0961411
ENSG00000011260	UTP18	UTP18 small subunit (SSU) processome component homolog (yeast) [Source:HGNC Symbol;Acc:HGNC:24274]	protein_coding	1.03299e-16	-0.913708	4.91108e-13	-0.449318	0.00772987	-0.991098	5.80169e-13	0.46439	0.00109731	-0.0773902	0.728246	-0.54178	0.000474477
ENSG00000011275	RNF216	ring finger protein 216 [Source:HGNC Symbol;Acc:HGNC:21698]	protein_coding	1.98417e-08	-0.496429	4.36071e-09	-0.0865567	0.550779	-0.127586	0.200978	0.409872	9.53011e-06	0.368842	0.000393197	-0.0410294	0.743549
ENSG00000011295	TTC19	tetratricopeptide repeat domain 19 [Source:HGNC Symbol;Acc:HGNC:26006]	protein_coding	5.35536e-18	-0.503074	4.63591e-13	-0.34652	6.0506e-05	-0.590229	4.8905e-15	0.156554	0.0537323	-0.0871551	0.423683	-0.243709	0.00498446
ENSG00000011304	PTBP1	polypyrimidine tract binding protein 1 [Source:HGNC Symbol;Acc:HGNC:9583]	protein_coding	4.09808e-06	-0.143843	0.0949924	-0.200473	0.0858953	-0.455214	2.54176e-07	-0.0566299	0.579575	-0.31137	0.00194485	-0.25474	0.0112589
ENSG00000011347	SYT7	synaptotagmin VII [Source:HGNC Symbol;Acc:HGNC:11514]	protein_coding	9.49233e-43	2.05383	9.45919e-21	0.33931	0.357073	2.87656	3.04869e-34	-1.71452	7.4128e-13	0.822723	0.00262291	2.53725	2.22932e-23
ENSG00000011376	LARS2	leucyl-tRNA synthetase 2, mitochondrial [Source:HGNC Symbol;Acc:HGNC:17095]	protein_coding	8.94736e-30	-0.843312	7.20597e-17	-0.0365375	0.855001	-0.97205	9.80919e-19	0.806774	1.40769e-13	-0.128739	0.425824	-0.935513	2.69942e-15
ENSG00000011405	PIK3C2A	phosphatidylinositol-4-phosphate 3-kinase, catalytic subunit type 2 alpha [Source:HGNC Symbol;Acc:HGNC:8971]	protein_coding	0.12906	-0.0667535	0.680723	-0.325804	0.108507	-0.000656536	0.99723	-0.25905	0.109066	0.066097	0.785218	0.325147	0.0658229
ENSG00000011422	PLAUR	plasminogen activator, urokinase receptor [Source:HGNC Symbol;Acc:HGNC:9053]	protein_coding	5.4599e-46	1.53424	3.68952e-30	-0.308312	0.131245	0.54914	0.000330528	-1.84256	8.98787e-37	-0.985103	3.47269e-10	0.857452	1.3383e-07
ENSG00000011426	ANLN	anillin, actin binding protein [Source:HGNC Symbol;Acc:HGNC:14082]	protein_coding	3.28376e-14	-3.60285	4.95485e-13	-0.435528	0.636369	-3.26039	2.33935e-09	3.16732	5.91001e-09	0.342459	0.686635	-2.82486	2.31445e-06
ENSG00000011451	WIZ	widely interspaced zinc finger motifs [Source:HGNC Symbol;Acc:HGNC:30917]	protein_coding	0.0142156	0.0283798	0.799437	-0.0209963	0.916453	-0.277687	0.00909381	-0.0493761	0.681864	-0.306067	0.0108738	-0.256691	0.0289535
ENSG00000011454	RABGAP1	RAB GTPase activating protein 1 [Source:HGNC Symbol;Acc:HGNC:17155]	protein_coding	0.00738504	-0.279522	0.0216761	0.113281	0.584275	0.0555599	0.715687	0.392803	0.00248459	0.335081	0.0276169	-0.0577211	0.740636
ENSG00000011465	DCN	decorin [Source:HGNC Symbol;Acc:HGNC:2705]	protein_coding	0.0754831	0.437777	0.582675	0.982375	0.362505	1.6984	0.0221551	0.544598	0.505397	1.26063	0.161511	0.716027	0.402515
ENSG00000011478	QPCTL	glutaminyl-peptide cyclotransferase-like [Source:HGNC Symbol;Acc:HGNC:25952]	protein_coding	0.000550796	-0.675223	0.00054369	0.0937837	0.796119	-0.213046	0.35359	0.769007	0.000245365	0.462177	0.0752609	-0.30683	0.212868
ENSG00000011485	PPP5C	protein phosphatase 5, catalytic subunit [Source:HGNC Symbol;Acc:HGNC:9322]	protein_coding	1.22909e-05	-0.166242	0.106686	-0.190022	0.195575	-0.524983	6.9783e-07	-0.0237793	0.854289	-0.35874	0.0031496	-0.334961	0.00492339
ENSG00000011523	CEP68	centrosomal protein 68kDa [Source:HGNC Symbol;Acc:HGNC:29076]	protein_coding	2.19614e-27	-1.81153	6.53416e-27	-0.140609	0.619381	-0.539891	0.00250454	1.67092	2.87183e-20	1.27164	1.2996e-10	-0.399282	0.0468754
ENSG00000011566	MAP4K3	mitogen-activated protein kinase kinase kinase kinase 3 [Source:HGNC Symbol;Acc:HGNC:6865]	protein_coding	0.00338902	0.00636378	0.969774	-0.488309	0.00763098	-0.0843124	0.631322	-0.494673	0.00110572	-0.0906761	0.693243	0.403997	0.0176613
ENSG00000011638	TMEM159	transmembrane protein 159 [Source:HGNC Symbol;Acc:HGNC:30136]	protein_coding	5.10982e-05	-0.0147189	0.925945	0.0797022	0.746923	0.547148	0.000108445	0.094421	0.56056	0.561867	0.000325513	0.467446	0.00272578
ENSG00000012048	BRCA1	breast cancer 1, early onset [Source:HGNC Symbol;Acc:HGNC:1100]	protein_coding	1.69477e-261	-4.73362	1.94249e-160	-0.250225	0.218817	-3.89773	1.45673e-118	4.4834	7.76916e-132	0.835892	0.000538925	-3.64751	7.36525e-94
ENSG00000012061	ERCC1	excision repair cross-complementation group 1 [Source:HGNC Symbol;Acc:HGNC:3433]	protein_coding	9.0108e-09	0.26168	0.040006	-0.316287	0.0686741	-0.495201	0.000262215	-0.577968	1.40813e-05	-0.756881	9.69997e-08	-0.178914	0.275027
ENSG00000012124	CD22	CD22 molecule [Source:HGNC Symbol;Acc:HGNC:1643]	protein_coding	0.0011627	0.924578	0.0466931	-0.544577	0.488048	-0.807745	0.14783	-1.46916	0.00363773	-1.73232	0.00279209	-0.263168	0.709909
ENSG00000012171	SEMA3B	sema domain, immunoglobulin domain (Ig), short basic domain, secreted, (semaphorin) 3B [Source:HGNC Symbol;Acc:HGNC:10724]	protein_coding	2.56712e-31	0.989234	2.32839e-17	0.36805	0.0243557	1.36259	2.39965e-27	-0.621185	1.39975e-06	0.373351	0.0135156	0.994535	4.66135e-13
ENSG00000012174	MBTPS2	membrane-bound transcription factor peptidase, site 2 [Source:HGNC Symbol;Acc:HGNC:15455]	protein_coding	6.63122e-08	-0.54304	5.80873e-06	-0.483521	0.00185793	-0.665158	3.15956e-07	0.0595185	0.700841	-0.122118	0.514	-0.181637	0.253935
ENSG00000012211	PRICKLE3	prickle homolog 3 (Drosophila) [Source:HGNC Symbol;Acc:HGNC:6645]	protein_coding	0.043218	-0.259907	0.0276735	-0.131924	0.490424	-0.300786	0.0194813	0.127983	0.350418	-0.040879	0.844151	-0.168862	0.261496
ENSG00000012232	EXTL3	exostosin-like glycosyltransferase 3 [Source:HGNC Symbol;Acc:HGNC:3518]	protein_coding	2.00086e-05	0.0362372	0.631271	-0.271331	0.00138104	-0.154129	0.0402793	-0.307568	1.661e-05	-0.190366	0.0251635	0.117202	0.170523
ENSG00000012504	NR1H4	nuclear receptor subfamily 1, group H, member 4 [Source:HGNC Symbol;Acc:HGNC:7967]	protein_coding	0.00851293	-2.0865	0.00522074	0.292138	0.822555	0.201574	0.817049	2.37864	0.00271612	2.28807	0.0121306	-0.0905644	0.928974
ENSG00000012660	ELOVL5	ELOVL fatty acid elongase 5 [Source:HGNC Symbol;Acc:HGNC:21308]	protein_coding	2.3205e-10	-0.698159	0.000317965	-0.0346588	0.929875	-1.28379	3.20222e-09	0.6635	0.00161227	-0.585627	0.0320354	-1.24913	8.1662e-08
ENSG00000012779	ALOX5	arachidonate 5-lipoxygenase [Source:HGNC Symbol;Acc:HGNC:435]	protein_coding	1.03407e-41	1.11251	5.8032e-27	0.259497	0.0901313	1.2748	5.17221e-30	-0.853014	4.29774e-14	0.162287	0.287566	1.0153	7.91338e-17
ENSG00000012822	CALCOCO1	calcium binding and coiled-coil domain 1 [Source:HGNC Symbol;Acc:HGNC:29306]	protein_coding	1.21743e-20	1.04102	1.63397e-12	0.41648	0.0470708	1.39928	1.40165e-18	-0.624542	0.0001361	0.35826	0.0722947	0.982801	1.89503e-08
ENSG00000012963	UBR7	ubiquitin protein ligase E3 component n-recognin 7 (putative) [Source:HGNC Symbol;Acc:HGNC:20344]	protein_coding	2.50884e-20	-0.713509	2.90104e-17	-0.128549	0.349381	-0.580116	3.20858e-10	0.584961	2.19813e-10	0.133393	0.287517	-0.451568	8.72635e-06
ENSG00000012983	MAP4K5	mitogen-activated protein kinase kinase kinase kinase 5 [Source:HGNC Symbol;Acc:HGNC:6867]	protein_coding	0.0422179	0.160978	0.173961	-0.177786	0.312767	0.00335173	0.981582	-0.338763	0.00588783	-0.157626	0.327988	0.181137	0.211641
ENSG00000013275	PSMC4	proteasome (prosome, macropain) 26S subunit, ATPase, 4 [Source:HGNC Symbol;Acc:HGNC:9551]	protein_coding	0.000319684	-0.178854	0.231631	0.183084	0.425293	-0.465876	0.00254368	0.361939	0.0198381	-0.287022	0.129578	-0.648961	8.18194e-05
ENSG00000013288	MAN2B2	mannosidase, alpha, class 2B, member 2 [Source:HGNC Symbol;Acc:HGNC:29623]	protein_coding	0.45589	0.000497441	0.996783	0.163379	0.359313	0.0819186	0.556319	0.162882	0.208581	0.0814212	0.653741	-0.0814608	0.605211
ENSG00000013306	SLC25A39	solute carrier family 25, member 39 [Source:HGNC Symbol;Acc:HGNC:24279]	protein_coding	4.69099e-23	-0.775121	1.99516e-14	0.0108558	0.964497	-0.790186	8.02474e-13	0.785976	8.51812e-13	-0.0150651	0.939466	-0.801042	2.04991e-11
ENSG00000013364	MVP	major vault protein [Source:HGNC Symbol;Acc:HGNC:7531]	protein_coding	6.50739e-36	0.890156	7.84862e-29	0.0467423	0.768653	0.591378	1.86426e-11	-0.843413	2.46239e-22	-0.298777	0.00336117	0.544636	1.40075e-08
ENSG00000013374	NUB1	negative regulator of ubiquitin-like proteins 1 [Source:HGNC Symbol;Acc:HGNC:17623]	protein_coding	0.000644743	0.336726	0.000279771	0.151962	0.294981	0.319996	0.00171535	-0.184764	0.0788338	-0.01673	0.922737	0.168034	0.156699
ENSG00000013375	PGM3	phosphoglucomutase 3 [Source:HGNC Symbol;Acc:HGNC:8907]	protein_coding	3.04616e-07	0.601648	1.78241e-05	0.000480996	0.999054	0.593311	0.000114769	-0.601167	8.47261e-05	-0.00833632	0.973709	0.59283	0.000418036
ENSG00000013392	RWDD2A	RWD domain containing 2A [Source:HGNC Symbol;Acc:HGNC:21385]	protein_coding	0.181104	0.00425246	0.986365	0.114411	0.770828	0.42086	0.0729543	0.110159	0.674813	0.416607	0.137168	0.306449	0.251346
ENSG00000013441	CLK1	CDC-like kinase 1 [Source:HGNC Symbol;Acc:HGNC:2068]	protein_coding	6.24253e-13	0.667875	6.38091e-09	0.057332	0.802409	0.712403	1.28319e-08	-0.610543	1.16549e-06	0.0445282	0.829152	0.655071	1.67615e-06
ENSG00000013503	POLR3B	polymerase (RNA) III (DNA directed) polypeptide B [Source:HGNC Symbol;Acc:HGNC:30348]	protein_coding	1.44787e-05	-0.546693	0.00114427	-0.0156025	0.967831	-0.708316	0.000103505	0.53109	0.00380812	-0.161623	0.537628	-0.692713	0.000499873
ENSG00000013523	ANGEL1	angel homolog 1 (Drosophila) [Source:HGNC Symbol;Acc:HGNC:19961]	protein_coding	8.14394e-22	-1.08245	4.46618e-18	-0.0773077	0.747176	-0.801823	4.38786e-09	1.00515	1.22255e-13	0.28063	0.108244	-0.724515	1.19269e-06
ENSG00000013561	RNF14	ring finger protein 14 [Source:HGNC Symbol;Acc:HGNC:10058]	protein_coding	0.000813656	0.311553	0.00435116	-0.127449	0.484364	0.0906071	0.498395	-0.439002	0.000180898	-0.220946	0.131851	0.218056	0.113048
ENSG00000013563	DNASE1L1	deoxyribonuclease I-like 1 [Source:HGNC Symbol;Acc:HGNC:2957]	protein_coding	3.94002e-11	0.644467	9.39315e-09	-0.0770294	0.721401	0.112329	0.423473	-0.721496	3.07215e-09	-0.532138	8.93529e-05	0.189358	0.204726
ENSG00000013573	DDX11	DEAD/H (Asp-Glu-Ala-Asp/His) box helicase 11 [Source:HGNC Symbol;Acc:HGNC:2736]	protein_coding	8.35093e-27	-0.747029	1.25181e-21	-0.0511294	0.733564	-0.554995	8.83705e-11	0.695899	2.36127e-16	0.192033	0.0746124	-0.503866	6.64421e-08
ENSG00000013583	HEBP1	heme binding protein 1 [Source:HGNC Symbol;Acc:HGNC:17176]	protein_coding	2.01971e-05	-0.451092	0.000122598	0.0487173	0.831252	0.060448	0.682163	0.49981	7.85311e-05	0.51154	0.000281877	0.0117307	0.946783
ENSG00000013588	GPRC5A	G protein-coupled receptor, class C, group 5, member A [Source:HGNC Symbol;Acc:HGNC:9836]	protein_coding	9.59718e-42	1.08977	1.33687e-20	-0.523885	0.000682442	0.0622352	0.68985	-1.61365	1.5185e-37	-1.02753	1.78386e-14	0.586121	4.077e-05
ENSG00000013619	MAMLD1	mastermind-like domain containing 1 [Source:HGNC Symbol;Acc:HGNC:2568]	protein_coding	1.06783e-35	1.7034	3.15292e-26	-0.106928	0.738865	0.561931	0.00255357	-1.81033	4.19429e-25	-1.14147	9.8643e-10	0.668859	0.000910022
ENSG00000013725	CD6	CD6 molecule [Source:HGNC Symbol;Acc:HGNC:1691]	protein_coding	0.000359217	-1.145	0.0373263	-0.508471	0.556957	-2.69361	0.000119124	0.636529	0.318243	-1.54861	0.0824234	-2.18514	0.00423749
ENSG00000013810	TACC3	transforming, acidic coiled-coil containing protein 3 [Source:HGNC Symbol;Acc:HGNC:11524]	protein_coding	4.9591e-57	-1.50328	1.99495e-28	-0.0172016	0.957705	-1.936	3.95261e-39	1.48608	5.59571e-24	-0.432725	0.0177282	-1.9188	1.42775e-33
ENSG00000014123	UFL1	UFM1-specific ligase 1 [Source:HGNC Symbol;Acc:HGNC:23039]	protein_coding	0.029511	0.00892773	0.954199	-0.347014	0.0527555	0.0216635	0.90054	-0.355942	0.0128992	0.0127357	0.958344	0.368678	0.0198529
ENSG00000014138	POLA2	polymerase (DNA directed), alpha 2, accessory subunit [Source:HGNC Symbol;Acc:HGNC:30073]	protein_coding	6.76363e-80	-1.95458	5.95894e-47	-0.151067	0.519556	-2.23512	2.04257e-51	1.80351	1.16864e-34	-0.280543	0.162142	-2.08405	3.442e-39
ENSG00000014164	ZC3H3	zinc finger CCCH-type containing 3 [Source:HGNC Symbol;Acc:HGNC:28972]	protein_coding	2.03311e-06	0.515639	2.05345e-06	0.228612	0.15692	0.494713	3.14272e-05	-0.287027	0.0183448	-0.0209255	0.918037	0.266102	0.0500288
ENSG00000014216	CAPN1	calpain 1, (mu/I) large subunit [Source:HGNC Symbol;Acc:HGNC:1476]	protein_coding	6.95533e-51	0.898506	2.25201e-41	0.0360628	0.788915	0.347136	3.6993e-06	-0.862443	8.97117e-33	-0.55137	9.6489e-13	0.311073	0.000158581
ENSG00000014257	ACPP	acid phosphatase, prostate [Source:HGNC Symbol;Acc:HGNC:125]	protein_coding	0.108039	-0.598119	0.147089	0.401556	0.539585	-0.0610605	0.906044	0.999676	0.0203384	0.537059	0.342137	-0.462617	0.367721
ENSG00000014641	MDH1	malate dehydrogenase 1, NAD (soluble) [Source:HGNC Symbol;Acc:HGNC:6970]	protein_coding	1.19419e-22	-0.706983	7.12227e-16	-0.126582	0.383157	-0.738855	9.05106e-15	0.580401	1.34636e-09	-0.0318719	0.845139	-0.612273	4.18729e-09
ENSG00000014824	SLC30A9	solute carrier family 30 (zinc transporter), member 9 [Source:HGNC Symbol;Acc:HGNC:1329]	protein_coding	0.0215124	-0.213683	0.054179	-0.285625	0.0547162	-0.296318	0.0133285	-0.0719413	0.589796	-0.0826342	0.633126	-0.0106929	0.948094
ENSG00000014914	MTMR11	myotubularin related protein 11 [Source:HGNC Symbol;Acc:HGNC:24307]	protein_coding	4.14726e-36	1.21528	7.03859e-25	0.122495	0.564892	1.20147	8.12198e-21	-1.09279	1.67225e-17	-0.0138171	0.952645	1.07897	1.00195e-14
ENSG00000014919	COX15	cytochrome c oxidase assembly homolog 15 (yeast) [Source:HGNC Symbol;Acc:HGNC:2263]	protein_coding	3.70998e-13	-0.546289	2.83653e-12	-0.126018	0.306451	-0.420446	8.77422e-07	0.420272	9.416e-07	0.125843	0.278508	-0.294429	0.00202996
ENSG00000015133	CCDC88C	coiled-coil domain containing 88C [Source:HGNC Symbol;Acc:HGNC:19967]	protein_coding	0.305075	0.0340978	0.838918	-0.162815	0.496287	-0.202416	0.22672	-0.196913	0.235073	-0.236514	0.235257	-0.039601	0.854957
ENSG00000015153	YAF2	YY1 associated factor 2 [Source:HGNC Symbol;Acc:HGNC:17363]	protein_coding	0.0159358	0.085233	0.699411	-0.500185	0.0641154	0.120262	0.616509	-0.585418	0.00617436	0.0350295	0.92146	0.620447	0.00797289
ENSG00000015171	ZMYND11	zinc finger, MYND-type containing 11 [Source:HGNC Symbol;Acc:HGNC:16966]	protein_coding	6.06852e-08	-0.637938	1.26998e-08	-0.27338	0.0903188	-0.471331	0.000147144	0.364558	0.00376969	0.166607	0.314217	-0.19795	0.179034
ENSG00000015413	DPEP1	dipeptidase 1 (renal) [Source:HGNC Symbol;Acc:HGNC:3002]	protein_coding	0.653706	0.159334	0.871554	0.619906	0.679523	0.97436	0.317865	0.460571	0.65505	0.815026	0.514	0.354455	0.769895
ENSG00000015475	BID	BH3 interacting domain death agonist [Source:HGNC Symbol;Acc:HGNC:1050]	protein_coding	2.73029e-07	-0.439778	5.95154e-05	-0.146493	0.412333	-0.592976	5.58485e-07	0.293285	0.0166759	-0.153198	0.342137	-0.446483	0.000682156
ENSG00000015479	MATR3	matrin 3 [Source:HGNC Symbol;Acc:HGNC:6912]	protein_coding	2.19419e-07	-0.5303	3.73537e-06	-0.419132	0.00604507	-0.603967	1.31144e-06	0.111168	0.429141	-0.0736671	0.703084	-0.184835	0.221802
ENSG00000015520	NPC1L1	NPC1-like 1 [Source:HGNC Symbol;Acc:HGNC:7898]	protein_coding	0.0071208	1.34067	0.00499851	0.0202315	0.986288	0.21782	0.724131	-1.32044	0.01159	-1.12285	0.071683	0.197588	0.781869
ENSG00000015532	XYLT2	xylosyltransferase II [Source:HGNC Symbol;Acc:HGNC:15517]	protein_coding	4.7914e-07	-0.67936	2.86653e-06	0.0129575	0.969915	-0.476486	0.0031874	0.692318	1.10928e-05	0.202874	0.34527	-0.489443	0.00550846
ENSG00000015568	RGPD5	RANBP2-like and GRIP domain containing 5 [Source:HGNC Symbol;Acc:HGNC:32418]	protein_coding	0.415432	-0.578986	0.285048	-0.825327	0.293967	-0.555957	0.358452	-0.246341	0.700841	0.0230289	0.979586	0.26937	0.714007
ENSG00000015676	NUDCD3	NudC domain containing 3 [Source:HGNC Symbol;Acc:HGNC:22208]	protein_coding	0.0315239	-0.243113	0.00819391	-0.0417815	0.813495	-0.157348	0.133928	0.201331	0.0481791	0.085765	0.542116	-0.115566	0.337088
ENSG00000016082	ISL1	ISL LIM homeobox 1 [Source:HGNC Symbol;Acc:HGNC:6132]	protein_coding	7.89649e-08	-0.81882	1.22129e-05	-0.271583	0.340504	-1.02266	6.26868e-07	0.547237	0.0088898	-0.203835	0.507237	-0.751072	0.00098576
ENSG00000016391	CHDH	choline dehydrogenase [Source:HGNC Symbol;Acc:HGNC:24288]	protein_coding	0.00203573	0.38031	0.15966	0.169115	0.724684	0.963393	0.000549212	-0.211195	0.498137	0.583083	0.0847431	0.794277	0.0104271
ENSG00000016402	IL20RA	interleukin 20 receptor, alpha [Source:HGNC Symbol;Acc:HGNC:6003]	protein_coding	5.63017e-05	-0.310076	0.000415978	-0.324151	0.00449642	-0.359539	0.00017011	-0.014075	0.90649	-0.049463	0.740597	-0.035388	0.788955
ENSG00000016864	GLT8D1	glycosyltransferase 8 domain containing 1 [Source:HGNC Symbol;Acc:HGNC:24870]	protein_coding	0.000745538	0.138529	0.348404	0.341695	0.0724048	0.5439	0.000222956	0.203166	0.196564	0.40537	0.0180105	0.202204	0.251504
ENSG00000017260	ATP2C1	ATPase, Ca++ transporting, type 2C, member 1 [Source:HGNC Symbol;Acc:HGNC:13211]	protein_coding	0.0289626	0.101144	0.300281	-0.181997	0.173871	-0.0557863	0.625912	-0.283142	0.00439882	-0.156931	0.213414	0.126211	0.290854
ENSG00000017483	SLC38A5	solute carrier family 38, member 5 [Source:HGNC Symbol;Acc:HGNC:18070]	protein_coding	0.175504	-1.11293	0.137427	-0.299135	0.832973	-1.48429	0.067833	0.813795	0.335995	-0.371358	0.7581	-1.18515	0.197647
ENSG00000017797	RALBP1	ralA binding protein 1 [Source:HGNC Symbol;Acc:HGNC:9841]	protein_coding	0.00300486	0.269035	0.00492975	0.00721394	0.973912	0.256198	0.0154553	-0.261822	0.0124342	-0.0128379	0.943024	0.248984	0.032682
ENSG00000018189	RUFY3	RUN and FYVE domain containing 3 [Source:HGNC Symbol;Acc:HGNC:30285]	protein_coding	0.0170679	-0.386919	0.00237201	-0.205753	0.289417	-0.117308	0.442136	0.181166	0.220336	0.269612	0.114691	0.0884455	0.620269
ENSG00000018280	SLC11A1	solute carrier family 11 (proton-coupled divalent metal ion transporter), member 1 [Source:HGNC Symbol;Acc:HGNC:10907]	protein_coding	0.809648	-0.1948	0.683639	0.168022	0.831056	-0.19685	0.710705	0.362822	0.463941	-0.00205014	0.998638	-0.364872	0.515658
ENSG00000018408	WWTR1	WW domain containing transcription regulator 1 [Source:HGNC Symbol;Acc:HGNC:24042]	protein_coding	4.7632e-17	0.618168	0.000148101	-0.838202	3.3436e-05	-0.383457	0.039333	-1.45637	2.8376e-17	-1.00163	8.6694e-08	0.454745	0.0249264
ENSG00000018510	AGPS	alkylglycerone phosphate synthase [Source:HGNC Symbol;Acc:HGNC:327]	protein_coding	0.180454	-0.194987	0.0927732	-0.227419	0.163019	-0.107399	0.426306	-0.0324317	0.823212	0.0875882	0.621817	0.12002	0.425947
ENSG00000018610	CXorf56	chromosome X open reading frame 56 [Source:HGNC Symbol;Acc:HGNC:26239]	protein_coding	0.283143	-0.0780995	0.522393	-0.0987105	0.608224	-0.225771	0.0713905	-0.020611	0.888263	-0.147672	0.356127	-0.127061	0.388932
ENSG00000018699	TTC27	tetratricopeptide repeat domain 27 [Source:HGNC Symbol;Acc:HGNC:25986]	protein_coding	9.29345e-46	-1.39918	1.61001e-31	-0.197069	0.27735	-1.35986	8.83613e-26	1.20211	1.73748e-20	0.0393133	0.868858	-1.16279	1.04744e-16
ENSG00000019102	VSIG2	V-set and immunoglobulin domain containing 2 [Source:HGNC Symbol;Acc:HGNC:17149]	protein_coding	0.0556818	0.257649	0.51586	0.911405	0.0643656	0.711546	0.0788227	0.653755	0.103445	0.453897	0.378836	-0.199858	0.695375
ENSG00000019144	PHLDB1	pleckstrin homology-like domain, family B, member 1 [Source:HGNC Symbol;Acc:HGNC:23697]	protein_coding	0.00134029	-0.107812	0.425109	0.199392	0.296892	-0.33349	0.0154417	0.307204	0.0244576	-0.225678	0.186006	-0.532881	0.000243245
ENSG00000019186	CYP24A1	cytochrome P450, family 24, subfamily A, polypeptide 1 [Source:HGNC Symbol;Acc:HGNC:2602]	protein_coding	9.43307e-19	1.55525	2.77504e-09	-0.887645	0.0141733	0.0302749	0.933419	-2.44289	5.5551e-18	-1.52497	7.55053e-07	0.91792	0.00503084
ENSG00000019485	PRDM11	PR domain containing 11 [Source:HGNC Symbol;Acc:HGNC:13996]	protein_coding	0.686383	0.141007	0.362618	0.159792	0.502511	0.0936411	0.600124	0.0187854	0.922153	-0.0473657	0.85319	-0.0661511	0.751911
ENSG00000019505	SYT13	synaptotagmin XIII [Source:HGNC Symbol;Acc:HGNC:14962]	protein_coding	2.00657e-05	0.0149484	0.891829	-0.414529	0.00025231	-0.142877	0.176941	-0.429477	9.85169e-06	-0.157825	0.21019	0.271652	0.0140046
ENSG00000019549	SNAI2	snail family zinc finger 2 [Source:HGNC Symbol;Acc:HGNC:11094]	protein_coding	8.68214e-13	2.20722	4.15502e-08	-0.934574	0.118743	1.32634	0.00352772	-3.14179	5.16981e-13	-0.880881	0.108464	2.26091	2.69282e-06
ENSG00000019582	CD74	CD74 molecule, major histocompatibility complex, class II invariant chain [Source:HGNC Symbol;Acc:HGNC:1697]	protein_coding	4.73761e-11	-2.11843	3.57859e-07	0.629544	0.266986	-1.24663	0.00432934	2.74798	2.85612e-10	0.871806	0.141772	-1.87617	3.81462e-05
ENSG00000019995	ZRANB1	zinc finger, RAN-binding domain containing 1 [Source:HGNC Symbol;Acc:HGNC:18224]	protein_coding	8.03594e-05	0.255587	0.0179169	0.0055832	0.982887	0.439578	0.000116714	-0.250003	0.0345131	0.183992	0.208137	0.433995	0.000497026
ENSG00000020129	NCDN	neurochondrin [Source:HGNC Symbol;Acc:HGNC:17597]	protein_coding	0.000113882	-0.306048	0.0170945	0.0398728	0.876204	-0.492357	0.000343785	0.345921	0.0126285	-0.186309	0.308149	-0.53223	0.000353261
ENSG00000020256	ZFP64	ZFP64 zinc finger protein [Source:HGNC Symbol;Acc:HGNC:15940]	protein_coding	0.342942	-0.100098	0.492961	0.143374	0.516805	0.0625918	0.710386	0.243471	0.102888	0.162689	0.400339	-0.080782	0.667921
ENSG00000020426	MNAT1	MNAT CDK-activating kinase assembly factor 1 [Source:HGNC Symbol;Acc:HGNC:7181]	protein_coding	0.000104265	-0.382039	0.00229594	-0.127215	0.548883	-0.541248	6.32833e-05	0.254824	0.0706558	-0.15921	0.388978	-0.414033	0.0060243
ENSG00000020577	SAMD4A	sterile alpha motif domain containing 4A [Source:HGNC Symbol;Acc:HGNC:23023]	protein_coding	0.000125535	0.046405	0.696058	-0.109217	0.534665	0.373567	0.000853489	-0.155622	0.193206	0.327162	0.010765	0.482784	6.10864e-05
ENSG00000020633	RUNX3	runt-related transcription factor 3 [Source:HGNC Symbol;Acc:HGNC:10473]	protein_coding	0.843104	-0.303289	0.608683	0.123215	0.9074	-0.24215	0.716042	0.426503	0.497937	0.0611389	0.951612	-0.365365	0.615589
ENSG00000020922	MRE11A	MRE11 meiotic recombination 11 homolog A (S. cerevisiae) [Source:HGNC Symbol;Acc:HGNC:7230]	protein_coding	3.05118e-36	-1.61108	1.73283e-31	-0.142544	0.552193	-1.06079	1.26765e-12	1.46853	8.35056e-23	0.550283	0.00188385	-0.918249	1.79846e-08
ENSG00000021300	PLEKHB1	pleckstrin homology domain containing, family B (evectins) member 1 [Source:HGNC Symbol;Acc:HGNC:19079]	protein_coding	2.96168e-08	-2.47864	1.78331e-06	0.572999	0.515706	-1.69275	0.00340767	3.05164	4.56748e-08	0.785892	0.298718	-2.26574	0.000246146
ENSG00000021355	SERPINB1	serpin peptidase inhibitor, clade B (ovalbumin), member 1 [Source:HGNC Symbol;Acc:HGNC:3311]	protein_coding	6.67145e-38	-1.0664	2.76338e-21	-0.667449	1.81889e-06	-1.4891	1.98821e-34	0.398951	0.00177102	-0.422696	0.0033408	-0.821647	1.05757e-09
ENSG00000021488	SLC7A9	solute carrier family 7 (amino acid transporter light chain, bo,+ system), member 9 [Source:HGNC Symbol;Acc:HGNC:11067]	protein_coding	0.721746	0.346399	0.440004	0.28279	0.705035	-0.0558974	0.919921	-0.0636099	0.907041	-0.402297	0.52522	-0.338687	0.551037
ENSG00000021574	SPAST	spastin [Source:HGNC Symbol;Acc:HGNC:11233]	protein_coding	0.0138644	-0.297096	0.0569031	-0.483206	0.0164317	-0.349058	0.0404779	-0.186111	0.298233	-0.0519625	0.848699	0.134148	0.52275
ENSG00000021762	OSBPL5	oxysterol binding protein-like 5 [Source:HGNC Symbol;Acc:HGNC:16392]	protein_coding	3.56031e-11	0.3512	3.18409e-05	-0.233505	0.0486466	-0.116053	0.253415	-0.584706	1.00148e-10	-0.467254	2.44011e-06	0.117452	0.302326
ENSG00000021776	AQR	aquarius intron-binding spliceosomal factor [Source:HGNC Symbol;Acc:HGNC:29513]	protein_coding	0.00187479	-0.252666	0.00424914	-0.0621895	0.698464	-0.293216	0.00233748	0.190477	0.0532339	-0.0405503	0.78925	-0.231027	0.0318887
ENSG00000021826	CPS1	carbamoyl-phosphate synthase 1, mitochondrial [Source:HGNC Symbol;Acc:HGNC:2323]	protein_coding	0.000559284	-1.14688	0.0098206	0.470154	0.478317	-0.917867	0.0594243	1.61703	0.000470931	0.229011	0.768353	-1.38802	0.00608033
ENSG00000022267	FHL1	four and a half LIM domains 1 [Source:HGNC Symbol;Acc:HGNC:3702]	protein_coding	0.100997	0.0943465	0.865503	0.636741	0.393708	1.04674	0.0447074	0.542395	0.321858	0.952394	0.125333	0.409999	0.517743
ENSG00000022277	RTFDC1	replication termination factor 2 domain containing 1 [Source:HGNC Symbol;Acc:HGNC:15890]	protein_coding	0.304939	0.139053	0.11109	0.00493484	0.980497	0.0439521	0.680023	-0.134118	0.161965	-0.0951007	0.443199	0.0390172	0.751325
ENSG00000022567	SLC45A4	solute carrier family 45, member 4 [Source:HGNC Symbol;Acc:HGNC:29196]	protein_coding	5.07454e-07	0.533374	3.44484e-05	0.226486	0.256604	0.691236	6.45463e-07	-0.306888	0.0345131	0.157861	0.407266	0.464749	0.00274802
ENSG00000022840	RNF10	ring finger protein 10 [Source:HGNC Symbol;Acc:HGNC:10055]	protein_coding	1.02528e-36	0.725539	2.38326e-29	0.0756123	0.506796	0.549796	7.52291e-15	-0.649927	1.79207e-20	-0.175742	0.042122	0.474184	7.81511e-10
ENSG00000022976	ZNF839	zinc finger protein 839 [Source:HGNC Symbol;Acc:HGNC:20345]	protein_coding	6.18134e-09	-0.581173	5.28368e-06	0.224599	0.236741	-0.252424	0.0836753	0.805772	2.76126e-09	0.32875	0.0534515	-0.477022	0.00154953
ENSG00000023041	ZDHHC6	zinc finger, DHHC-type containing 6 [Source:HGNC Symbol;Acc:HGNC:19160]	protein_coding	0.0171924	-0.0409594	0.684286	-0.197386	0.117727	-0.252252	0.00996655	-0.156427	0.119482	-0.211293	0.0691138	-0.0548661	0.665576
ENSG00000023171	GRAMD1B	GRAM domain containing 1B [Source:HGNC Symbol;Acc:HGNC:29214]	protein_coding	2.78941e-12	0.641035	1.30422e-10	-0.000247532	0.999245	0.365079	0.00117164	-0.641283	3.4106e-09	-0.275956	0.0362338	0.365326	0.00299483
ENSG00000023191	RNH1	ribonuclease/angiogenin inhibitor 1 [Source:HGNC Symbol;Acc:HGNC:10074]	protein_coding	0.170038	0.0873138	0.464173	0.0185828	0.93683	-0.167623	0.185715	-0.068731	0.609204	-0.254937	0.074043	-0.186206	0.181038
ENSG00000023228	NDUFS1	NADH dehydrogenase (ubiquinone) Fe-S protein 1, 75kDa (NADH-coenzyme Q reductase) [Source:HGNC Symbol;Acc:HGNC:7707]	protein_coding	7.20105e-05	-0.190844	0.0184244	-0.213826	0.0508353	-0.384311	7.0486e-06	-0.0229824	0.824478	-0.193467	0.0649534	-0.170485	0.0884178
ENSG00000023287	RB1CC1	RB1-inducible coiled-coil 1 [Source:HGNC Symbol;Acc:HGNC:15574]	protein_coding	7.69615e-12	0.717632	4.60233e-07	-0.219379	0.343988	0.618682	8.23153e-05	-0.937011	1.05024e-09	-0.09895	0.677011	0.838061	6.55152e-07
ENSG00000023318	ERP44	endoplasmic reticulum protein 44 [Source:HGNC Symbol;Acc:HGNC:18311]	protein_coding	1.71547e-17	0.498501	5.6882e-16	0.0431879	0.717001	0.174977	0.0142707	-0.455313	1.00075e-11	-0.323525	1.32217e-05	0.131789	0.101623
ENSG00000023330	ALAS1	5'-aminolevulinate synthase 1 [Source:HGNC Symbol;Acc:HGNC:396]	protein_coding	3.53805e-25	0.817036	2.06597e-15	-0.271809	0.0693067	0.222533	0.0673569	-1.08884	1.11962e-22	-0.594503	1.15655e-06	0.494342	8.28622e-05
ENSG00000023445	BIRC3	baculoviral IAP repeat containing 3 [Source:HGNC Symbol;Acc:HGNC:591]	protein_coding	0.00151777	0.491094	0.00106105	0.0876869	0.757385	0.429569	0.0099946	-0.403407	0.0150394	-0.0615247	0.81369	0.341882	0.0675868
ENSG00000023516	AKAP11	A kinase (PRKA) anchor protein 11 [Source:HGNC Symbol;Acc:HGNC:369]	protein_coding	0.0152585	-0.164256	0.325374	-0.495504	0.0164403	-0.0265053	0.897924	-0.331248	0.0570981	0.137751	0.566672	0.468999	0.0125677
ENSG00000023572	GLRX2	glutaredoxin 2 [Source:HGNC Symbol;Acc:HGNC:16065]	protein_coding	0.0185034	0.168453	0.406913	-0.398205	0.14319	-0.264639	0.231258	-0.566659	0.00598378	-0.433093	0.0822197	0.133566	0.619741
ENSG00000023608	SNAPC1	small nuclear RNA activating complex, polypeptide 1, 43kDa [Source:HGNC Symbol;Acc:HGNC:11134]	protein_coding	5.07338e-06	-0.839183	2.88524e-06	-0.252921	0.376838	-0.674987	0.000631739	0.586262	0.00328953	0.164196	0.569771	-0.422066	0.0613136
ENSG00000023697	DERA	deoxyribose-phosphate aldolase (putative) [Source:HGNC Symbol;Acc:HGNC:24269]	protein_coding	4.71681e-06	0.343018	0.00218774	-0.24624	0.129197	0.180534	0.164994	-0.589258	7.74689e-07	-0.162484	0.30859	0.426774	0.00138054
ENSG00000023734	STRAP	serine/threonine kinase receptor associated protein [Source:HGNC Symbol;Acc:HGNC:30796]	protein_coding	1.08666e-06	-0.21292	0.0142207	-0.38174	0.000352274	-0.437652	1.86693e-06	-0.168821	0.0823823	-0.224732	0.0438	-0.0559115	0.650355
ENSG00000023839	ABCC2	ATP-binding cassette, sub-family C (CFTR/MRP), member 2 [Source:HGNC Symbol;Acc:HGNC:53]	protein_coding	1.14509e-12	-1.66162	9.66357e-11	-0.751229	0.035679	-1.68292	1.92037e-09	0.910386	0.00158019	-0.0213035	0.965921	-0.931689	0.00331916
ENSG00000023892	DEF6	differentially expressed in FDCP 6 homolog (mouse) [Source:HGNC Symbol;Acc:HGNC:2760]	protein_coding	0.72464	0.0352585	0.824095	0.152124	0.498907	0.0242191	0.893444	0.116866	0.473016	-0.0110395	0.965292	-0.127905	0.487211
ENSG00000023902	PLEKHO1	pleckstrin homology domain containing, family O member 1 [Source:HGNC Symbol;Acc:HGNC:24310]	protein_coding	0.176398	0.365557	0.48054	1.01862	0.110306	0.434738	0.439631	0.653066	0.205578	0.0691814	0.936088	-0.583885	0.317363
ENSG00000023909	GCLM	glutamate-cysteine ligase, modifier subunit [Source:HGNC Symbol;Acc:HGNC:4312]	protein_coding	0.0662481	-0.177156	0.228956	-0.0565194	0.833406	-0.372631	0.0160785	0.120637	0.469541	-0.195475	0.336554	-0.316112	0.0666491
ENSG00000024048	UBR2	ubiquitin protein ligase E3 component n-recognin 2 [Source:HGNC Symbol;Acc:HGNC:21289]	protein_coding	7.65226e-07	0.419412	3.55723e-05	-0.0545125	0.781932	0.35353	0.0016683	-0.473925	1.64509e-05	-0.0658822	0.696729	0.408043	0.000805161
ENSG00000024422	EHD2	EH-domain containing 2 [Source:HGNC Symbol;Acc:HGNC:3243]	protein_coding	4.08412e-83	1.51539	3.48242e-59	-0.0737558	0.685487	1.02261	1.83375e-23	-1.58915	1.91596e-55	-0.492782	1.37536e-05	1.09637	3.27617e-23
ENSG00000024526	DEPDC1	DEP domain containing 1 [Source:HGNC Symbol;Acc:HGNC:22949]	protein_coding	3.07095e-27	-4.4094	4.43902e-24	-0.527475	0.473115	-4.08663	4.85193e-18	3.88193	2.08979e-16	0.322778	0.668683	-3.55915	3.8847e-12
ENSG00000024862	CCDC28A	coiled-coil domain containing 28A [Source:HGNC Symbol;Acc:HGNC:21098]	protein_coding	9.67944e-06	0.48536	0.0335526	0.343629	0.32877	1.13656	1.60435e-06	-0.141731	0.60719	0.651197	0.0196958	0.792929	0.00267867
ENSG00000025156	HSF2	heat shock transcription factor 2 [Source:HGNC Symbol;Acc:HGNC:5225]	protein_coding	9.50592e-12	-1.18978	2.73885e-10	-0.12645	0.710574	-0.906955	9.29012e-06	1.06333	2.0241e-07	0.282829	0.323088	-0.780505	0.000510143
ENSG00000025293	PHF20	PHD finger protein 20 [Source:HGNC Symbol;Acc:HGNC:16098]	protein_coding	0.464534	-0.100532	0.416975	0.00722702	0.978824	0.0878038	0.527903	0.107759	0.427836	0.188335	0.23339	0.0805768	0.612867
ENSG00000025434	NR1H3	nuclear receptor subfamily 1, group H, member 3 [Source:HGNC Symbol;Acc:HGNC:7966]	protein_coding	0.240802	0.210022	0.1201	0.210953	0.292018	0.23293	0.116681	0.00093119	0.995621	0.0229082	0.923698	0.021977	0.912256
ENSG00000025708	TYMP	thymidine phosphorylase [Source:HGNC Symbol;Acc:HGNC:3148]	protein_coding	8.88519e-39	1.82918	8.22097e-31	0.0248267	0.94673	0.859944	1.34355e-06	-1.80435	1.01238e-25	-0.969237	2.29274e-07	0.835117	1.71189e-05
ENSG00000025770	NCAPH2	non-SMC condensin II complex, subunit H2 [Source:HGNC Symbol;Acc:HGNC:25071]	protein_coding	0.00616555	-0.293247	0.0144845	-0.0186029	0.942035	-0.337317	0.0100707	0.274644	0.0371716	-0.0440699	0.83303	-0.318714	0.0275749
ENSG00000025772	TOMM34	translocase of outer mitochondrial membrane 34 [Source:HGNC Symbol;Acc:HGNC:15746]	protein_coding	3.3012e-11	-0.94541	2.0815e-06	-0.459327	0.11432	-1.44412	1.75203e-11	0.486083	0.0317904	-0.49871	0.0613562	-0.984793	3.57102e-05
ENSG00000025796	SEC63	SEC63 homolog (S. cerevisiae) [Source:HGNC Symbol;Acc:HGNC:21082]	protein_coding	0.0165514	0.129347	0.115186	-0.135247	0.261006	0.0219137	0.832123	-0.264594	0.00199388	-0.107433	0.343063	0.157161	0.113357
ENSG00000025800	KPNA6	karyopherin alpha 6 (importin alpha 7) [Source:HGNC Symbol;Acc:HGNC:6399]	protein_coding	0.023767	-0.135988	0.105119	-0.253293	0.0179332	-0.150903	0.101204	-0.117304	0.209685	-0.0149148	0.920669	0.10239	0.337521
ENSG00000026025	VIM	vimentin [Source:HGNC Symbol;Acc:HGNC:12692]	protein_coding	0.122879	0.308852	0.607431	-0.726218	0.400567	-0.843137	0.175408	-1.03507	0.086223	-1.15199	0.105101	-0.116919	0.885684
ENSG00000026036	RTEL1-TNFRSF6B	RTEL1-TNFRSF6B readthrough (NMD candidate) [Source:HGNC Symbol;Acc:HGNC:44095]	protein_coding	2.52191e-11	-0.429994	0.000276822	-0.0797148	0.716574	-0.838054	3.6117e-11	0.350279	0.00731373	-0.40806	0.00637544	-0.758339	3.78011e-08
ENSG00000026103	FAS	Fas cell surface death receptor [Source:HGNC Symbol;Acc:HGNC:11920]	protein_coding	1.91532e-32	-2.44336	1.12498e-24	-0.467097	0.1431	-2.16465	1.15809e-17	1.97626	1.67443e-14	0.278703	0.487086	-1.69756	7.20674e-10
ENSG00000026297	RNASET2	ribonuclease T2 [Source:HGNC Symbol;Acc:HGNC:21686]	protein_coding	1.47565e-06	-0.733656	3.90964e-05	-0.353827	0.186755	-0.915211	2.26097e-06	0.379829	0.0619448	-0.181555	0.510058	-0.561384	0.0104271
ENSG00000026508	CD44	CD44 molecule (Indian blood group) [Source:HGNC Symbol;Acc:HGNC:1681]	protein_coding	4.02022e-33	-0.384644	2.20048e-06	-0.382275	0.00020632	-1.08683	1.18482e-36	0.00236917	0.983311	-0.702185	1.54215e-14	-0.704554	7.77681e-14
ENSG00000026652	AGPAT4	1-acylglycerol-3-phosphate O-acyltransferase 4 [Source:HGNC Symbol;Acc:HGNC:20885]	protein_coding	2.3604e-22	2.5225	2.34379e-19	0.220671	0.684408	1.17822	0.000209926	-2.30182	4.07284e-14	-1.34428	7.1776e-05	0.957544	0.0065953
ENSG00000026950	BTN3A1	butyrophilin, subfamily 3, member A1 [Source:HGNC Symbol;Acc:HGNC:1138]	protein_coding	4.12271e-06	-0.0571947	0.760054	0.607403	0.00315944	0.566012	0.00119218	0.664597	0.000113522	0.623206	0.0012901	-0.041391	0.863998
ENSG00000027001	MIPEP	mitochondrial intermediate peptidase [Source:HGNC Symbol;Acc:HGNC:7104]	protein_coding	7.85387e-08	-0.462519	9.06181e-06	0.00815784	0.973008	-0.449493	7.97341e-05	0.470677	3.07207e-05	0.0130257	0.948569	-0.457651	0.000215802
ENSG00000027075	PRKCH	protein kinase C, eta [Source:HGNC Symbol;Acc:HGNC:9403]	protein_coding	1.36518e-11	-0.928463	5.0904e-10	-0.373542	0.0774486	-0.914383	1.97191e-08	0.554921	0.000887188	0.0140798	0.961681	-0.540841	0.00327982
ENSG00000027697	IFNGR1	interferon gamma receptor 1 [Source:HGNC Symbol;Acc:HGNC:5439]	protein_coding	0.0116721	-0.253552	0.0440235	-0.40857	0.0116454	-0.256435	0.0654556	-0.155018	0.281544	-0.00288359	0.990652	0.152135	0.351412
ENSG00000027847	B4GALT7	xylosylprotein beta 1,4-galactosyltransferase, polypeptide 7 [Source:HGNC Symbol;Acc:HGNC:930]	protein_coding	0.0294516	-0.154726	0.226304	0.205036	0.260686	-0.0862693	0.563578	0.359762	0.00609183	0.0684565	0.734423	-0.291306	0.0485528
ENSG00000027869	SH2D2A	SH2 domain containing 2A [Source:HGNC Symbol;Acc:HGNC:10821]	protein_coding	1.47663e-20	-2.4274	2.35955e-12	-0.340634	0.518604	-3.00764	7.07446e-14	2.08677	2.30367e-08	-0.580242	0.33345	-2.66701	5.5508e-10
ENSG00000028116	VRK2	vaccinia related kinase 2 [Source:HGNC Symbol;Acc:HGNC:12719]	protein_coding	2.54764e-09	-0.585493	2.37474e-07	-0.149898	0.418886	-0.626218	3.88803e-07	0.435594	0.000499845	-0.0407254	0.846433	-0.47632	0.000493862
ENSG00000028137	TNFRSF1B	tumor necrosis factor receptor superfamily, member 1B [Source:HGNC Symbol;Acc:HGNC:11917]	protein_coding	3.18857e-12	-1.05184	5.74541e-07	-0.587299	0.0441242	-1.60854	2.08064e-12	0.464541	0.0549156	-0.556698	0.0513793	-1.02124	6.2148e-05
ENSG00000028203	VEZT	vezatin, adherens junctions transmembrane protein [Source:HGNC Symbol;Acc:HGNC:18258]	protein_coding	1.16913e-05	0.288171	0.000252127	-0.101131	0.439248	0.0965534	0.306436	-0.389302	4.24677e-06	-0.191618	0.0651985	0.197684	0.0437795
ENSG00000028277	POU2F2	POU class 2 homeobox 2 [Source:HGNC Symbol;Acc:HGNC:9213]	protein_coding	6.01829e-17	2.14223	2.36376e-12	0.229171	0.711261	2.08179	2.47226e-10	-1.91306	6.48343e-09	-0.0604469	0.909664	1.85261	1.99917e-07
ENSG00000028310	BRD9	bromodomain containing 9 [Source:HGNC Symbol;Acc:HGNC:25818]	protein_coding	0.0092945	0.162479	0.0673956	-0.126648	0.353243	-0.0499701	0.645702	-0.289127	0.00198982	-0.21245	0.0584987	0.0766777	0.518374
ENSG00000028528	SNX1	sorting nexin 1 [Source:HGNC Symbol;Acc:HGNC:11172]	protein_coding	0.00571171	0.162008	0.0145797	0.0632042	0.57541	0.21804	0.00223358	-0.0988038	0.188937	0.0560317	0.583021	0.154835	0.0541421
ENSG00000028839	TBPL1	TBP-like 1 [Source:HGNC Symbol;Acc:HGNC:11589]	protein_coding	0.00295704	-0.153942	0.308295	-0.107636	0.667078	-0.549108	0.000390684	0.0463064	0.798734	-0.395166	0.0327257	-0.441472	0.0103275
ENSG00000029153	ARNTL2	aryl hydrocarbon receptor nuclear translocator-like 2 [Source:HGNC Symbol;Acc:HGNC:18984]	protein_coding	0.359079	-0.0379659	0.922147	-0.292266	0.611465	-0.557955	0.138453	-0.2543	0.521927	-0.519989	0.255408	-0.265688	0.558024
ENSG00000029363	BCLAF1	BCL2-associated transcription factor 1 [Source:HGNC Symbol;Acc:HGNC:16863]	protein_coding	0.000155975	-0.330465	0.00185224	-0.241718	0.111171	-0.469497	4.11344e-05	0.0887475	0.490885	-0.139032	0.367189	-0.227779	0.0871482
ENSG00000029364	SLC39A9	solute carrier family 39, member 9 [Source:HGNC Symbol;Acc:HGNC:20182]	protein_coding	4.1603e-05	0.239075	0.00324311	-0.107208	0.416772	0.212407	0.0186025	-0.346283	6.75201e-05	-0.0266681	0.854077	0.319615	0.000861795
ENSG00000029534	ANK1	ankyrin 1, erythrocytic [Source:HGNC Symbol;Acc:HGNC:492]	protein_coding	0.00983266	-0.0062564	0.963279	-0.0135468	0.958705	-0.359211	0.00432335	-0.00729043	0.963085	-0.352955	0.0143683	-0.345664	0.0124282
ENSG00000029639	TFB1M	transcription factor B1, mitochondrial [Source:HGNC Symbol;Acc:HGNC:17037]	protein_coding	9.27065e-15	-1.04061	3.55513e-10	-0.146137	0.601451	-1.11464	7.06876e-10	0.89447	6.96249e-07	-0.0740305	0.814292	-0.968501	8.49341e-07
ENSG00000029725	RABEP1	rabaptin, RAB GTPase binding effector protein 1 [Source:HGNC Symbol;Acc:HGNC:17677]	protein_coding	0.0407625	-0.222236	0.0197953	-0.234118	0.0712428	-0.105376	0.344093	-0.011882	0.92597	0.11686	0.396456	0.128742	0.29429
ENSG00000029993	HMGB3	high mobility group box 3 [Source:HGNC Symbol;Acc:HGNC:5004]	protein_coding	2.48814e-68	-1.87798	8.0621e-46	-0.202055	0.348263	-1.89593	6.56148e-40	1.67592	1.18688e-31	-0.0179536	0.946411	-1.69388	6.35239e-28
ENSG00000030066	NUP160	nucleoporin 160kDa [Source:HGNC Symbol;Acc:HGNC:18017]	protein_coding	8.35224e-25	-0.97552	1.021e-22	-0.314235	0.0216361	-0.771826	1.05524e-12	0.661285	1.42558e-09	0.203694	0.151947	-0.457591	0.000161018
ENSG00000030110	BAK1	BCL2-antagonist/killer 1 [Source:HGNC Symbol;Acc:HGNC:949]	protein_coding	0.000128733	0.52389	0.000220289	-0.0547344	0.848531	0.192179	0.254699	-0.578624	0.000171217	-0.331711	0.0783385	0.246913	0.178917
ENSG00000030419	IKZF2	IKAROS family zinc finger 2 (Helios) [Source:HGNC Symbol;Acc:HGNC:13177]	protein_coding	0.000681922	-0.383044	0.0670132	0.131039	0.72666	0.473105	0.0357618	0.514083	0.0213628	0.856148	0.000351209	0.342066	0.182822
ENSG00000030582	GRN	granulin [Source:HGNC Symbol;Acc:HGNC:4601]	protein_coding	9.37194e-09	0.482764	1.825e-06	0.357128	0.00836605	0.640941	4.49118e-09	-0.125636	0.300392	0.158176	0.278458	0.283812	0.0245048
ENSG00000031003	FAM13B	family with sequence similarity 13, member B [Source:HGNC Symbol;Acc:HGNC:1335]	protein_coding	0.269373	-0.243376	0.0657969	-0.0777456	0.743445	-0.125784	0.413237	0.165631	0.267934	0.117592	0.554762	-0.0480385	0.800556
ENSG00000031691	CENPQ	centromere protein Q [Source:HGNC Symbol;Acc:HGNC:21347]	protein_coding	1.57793e-14	-1.18416	7.62461e-11	-0.271844	0.323106	-1.2255	6.14803e-10	0.912316	4.77685e-06	-0.0413423	0.910179	-0.953659	1.1834e-05
ENSG00000031698	SARS	seryl-tRNA synthetase [Source:HGNC Symbol;Acc:HGNC:10537]	protein_coding	1.74948e-13	0.538074	3.77834e-12	0.0215113	0.898136	0.188922	0.0364956	-0.516563	8.99772e-10	-0.349153	0.000234852	0.167411	0.0966416
ENSG00000031823	RANBP3	RAN binding protein 3 [Source:HGNC Symbol;Acc:HGNC:9850]	protein_coding	0.00527741	0.301531	0.00324071	0.0962176	0.588728	-0.023219	0.864349	-0.205313	0.0736777	-0.32475	0.0109069	-0.119437	0.382859
ENSG00000032219	ARID4A	AT rich interactive domain 4A (RBP1-like) [Source:HGNC Symbol;Acc:HGNC:9885]	protein_coding	0.000114097	0.426141	0.00294282	0.0718565	0.793945	0.578297	0.000179751	-0.354284	0.0254298	0.152156	0.475555	0.506441	0.00294476
ENSG00000032389	TSSC1	tumor suppressing subtransferable candidate 1 [Source:HGNC Symbol;Acc:HGNC:12383]	protein_coding	0.000404778	0.122752	0.311013	-0.00948264	0.971889	-0.378978	0.00231633	-0.132234	0.319066	-0.501729	0.000193188	-0.369495	0.00674597
ENSG00000032444	PNPLA6	patatin-like phospholipase domain containing 6 [Source:HGNC Symbol;Acc:HGNC:16268]	protein_coding	4.88509e-21	0.963165	5.37116e-19	0.231956	0.160363	0.757861	1.74155e-10	-0.73121	6.05279e-10	-0.205304	0.180828	0.525905	6.27764e-05
ENSG00000032742	IFT88	intraflagellar transport 88 [Source:HGNC Symbol;Acc:HGNC:20606]	protein_coding	0.000484368	0.0434141	0.7358	-0.372686	0.0116645	-0.275515	0.0290855	-0.4161	0.000659128	-0.318929	0.0274923	0.0971713	0.537658
ENSG00000033011	ALG1	ALG1, chitobiosyldiphosphodolichol beta-mannosyltransferase [Source:HGNC Symbol;Acc:HGNC:18294]	protein_coding	9.61622e-16	-0.882078	4.23067e-12	0.0313942	0.909048	-0.671515	1.6556e-06	0.913472	3.56227e-11	0.210563	0.257683	-0.702909	3.78166e-06
ENSG00000033030	ZCCHC8	zinc finger, CCHC domain containing 8 [Source:HGNC Symbol;Acc:HGNC:25265]	protein_coding	0.00180242	0.137064	0.123037	-0.0600392	0.699441	0.264552	0.00431066	-0.197103	0.0374271	0.127489	0.287566	0.324592	0.00116393
ENSG00000033050	ABCF2	ATP-binding cassette, sub-family F (GCN20), member 2 [Source:HGNC Symbol;Acc:HGNC:71]	protein_coding	3.54362e-22	-0.781169	1.43782e-14	-0.325282	0.0192825	-0.965373	2.05494e-18	0.455887	5.47843e-05	-0.184204	0.214884	-0.640092	1.46562e-07
ENSG00000033100	CHPF2	chondroitin polymerizing factor 2 [Source:HGNC Symbol;Acc:HGNC:29270]	protein_coding	4.05987e-10	0.557252	5.02298e-09	3.56848e-05	0.999969	0.29972	0.00564245	-0.557216	7.69441e-08	-0.257532	0.040585	0.299684	0.0117286
ENSG00000033170	FUT8	fucosyltransferase 8 (alpha (1,6) fucosyltransferase) [Source:HGNC Symbol;Acc:HGNC:4019]	protein_coding	1.61451e-11	1.01258	1.66165e-09	-0.0703569	0.838403	0.537775	0.00482934	-1.08294	2.87937e-09	-0.474806	0.0312432	0.608132	0.00331732
ENSG00000033178	UBA6	ubiquitin-like modifier activating enzyme 6 [Source:HGNC Symbol;Acc:HGNC:25581]	protein_coding	4.82799e-13	0.323389	0.000870408	-0.459915	0.000162679	0.154928	0.172128	-0.783304	2.40151e-14	-0.16846	0.212396	0.614844	5.18007e-08
ENSG00000033327	GAB2	GRB2-associated binding protein 2 [Source:HGNC Symbol;Acc:HGNC:14458]	protein_coding	0.00126387	-0.348024	0.081838	0.250306	0.414118	-0.492274	0.0224817	0.59833	0.00415609	-0.144251	0.648212	-0.74258	0.0010869
ENSG00000033627	ATP6V0A1	ATPase, H+ transporting, lysosomal V0 subunit a1 [Source:HGNC Symbol;Acc:HGNC:865]	protein_coding	7.86231e-18	0.881607	3.89894e-12	0.276728	0.148506	1.05697	1.45306e-14	-0.604879	1.57269e-05	0.17536	0.351471	0.780239	2.34703e-07
ENSG00000033800	PIAS1	protein inhibitor of activated STAT, 1 [Source:HGNC Symbol;Acc:HGNC:2752]	protein_coding	0.0024131	0.202051	0.124575	-0.0245581	0.926976	0.423962	0.00199226	-0.22661	0.112776	0.22191	0.199218	0.44852	0.00269577
ENSG00000033867	SLC4A7	solute carrier family 4, sodium bicarbonate cotransporter, member 7 [Source:HGNC Symbol;Acc:HGNC:11033]	protein_coding	2.27049e-10	-0.298454	0.0382721	-0.884096	1.07242e-07	-0.768961	3.66908e-07	-0.585641	0.00013539	-0.470506	0.00788507	0.115135	0.565333
ENSG00000034152	MAP2K3	mitogen-activated protein kinase kinase 3 [Source:HGNC Symbol;Acc:HGNC:6843]	protein_coding	1.47369e-36	0.931515	3.52293e-18	-0.50123	0.000350776	0.255071	0.0428752	-1.43274	2.44255e-35	-0.676443	8.55971e-08	0.756301	3.86481e-09
ENSG00000034239	EFCAB1	EF-hand calcium binding domain 1 [Source:HGNC Symbol;Acc:HGNC:25678]	protein_coding	0.0010406	-1.04722	0.041952	0.273244	0.749915	-1.68102	0.00413928	1.32046	0.0146944	-0.633799	0.448076	-1.95426	0.00156192
ENSG00000034510	TMSB10	thymosin beta 10 [Source:HGNC Symbol;Acc:HGNC:11879]	protein_coding	1.64054e-09	0.615649	8.3275e-07	-0.1012	0.6609	-0.0313106	0.853322	-0.716849	1.13387e-07	-0.646959	1.26746e-05	0.0698897	0.70605
ENSG00000034533	ASTE1	asteroid homolog 1 (Drosophila) [Source:HGNC Symbol;Acc:HGNC:25021]	protein_coding	6.42822e-06	0.396253	0.00248377	0.291832	0.117727	0.685823	6.7477e-07	-0.104422	0.508511	0.289569	0.0905883	0.393991	0.0115063
ENSG00000034677	RNF19A	ring finger protein 19A, RBR E3 ubiquitin protein ligase [Source:HGNC Symbol;Acc:HGNC:13432]	protein_coding	6.64788e-87	2.82779	3.20872e-71	0.365715	0.13143	2.38332	1.84497e-43	-2.46208	1.44554e-46	-0.444475	0.0368996	2.0176	2.64812e-27
ENSG00000034693	PEX3	peroxisomal biogenesis factor 3 [Source:HGNC Symbol;Acc:HGNC:8858]	protein_coding	4.20519e-14	-1.01879	4.53029e-14	-0.107463	0.651773	-0.458224	0.00199225	0.911324	4.74207e-10	0.560563	0.00100766	-0.350761	0.034528
ENSG00000034713	GABARAPL2	GABA(A) receptor-associated protein-like 2 [Source:HGNC Symbol;Acc:HGNC:13291]	protein_coding	2.87496e-19	0.757444	4.56526e-14	-0.0136536	0.954286	0.617772	2.09125e-08	-0.771097	1.52931e-12	-0.139672	0.34817	0.631426	1.35473e-07
ENSG00000035115	SH3YL1	SH3 and SYLF domain containing 1 [Source:HGNC Symbol;Acc:HGNC:29546]	protein_coding	0.0197797	0.203384	0.06437	-0.0542454	0.790735	0.238441	0.0468088	-0.257629	0.029443	0.0350569	0.853864	0.292686	0.0242553
ENSG00000035141	FAM136A	family with sequence similarity 136, member A [Source:HGNC Symbol;Acc:HGNC:25911]	protein_coding	1.42703e-20	-0.822839	2.03687e-12	-0.195202	0.297802	-1.04312	2.04578e-16	0.627636	1.04179e-06	-0.22028	0.189706	-0.847917	9.82079e-10
ENSG00000035403	VCL	vinculin [Source:HGNC Symbol;Acc:HGNC:12665]	protein_coding	0.00898388	0.0402591	0.840735	-0.42634	0.0732488	-0.39738	0.0379595	-0.466599	0.01274	-0.437639	0.04615	0.0289602	0.91235
ENSG00000035499	DEPDC1B	DEP domain containing 1B [Source:HGNC Symbol;Acc:HGNC:24902]	protein_coding	1.09109e-20	0.932792	1.26698e-10	-0.480649	0.0169998	0.0314086	0.875107	-1.41344	1.58634e-19	-0.901383	1.16722e-07	0.512057	0.00466608
ENSG00000035664	DAPK2	death-associated protein kinase 2 [Source:HGNC Symbol;Acc:HGNC:2675]	protein_coding	0.0418133	0.244311	0.497846	0.439279	0.401186	0.925732	0.00953426	0.194969	0.629056	0.681421	0.114087	0.486452	0.242447
ENSG00000035681	NSMAF	neutral sphingomyelinase (N-SMase) activation associated factor [Source:HGNC Symbol;Acc:HGNC:8017]	protein_coding	3.32037e-42	-1.43012	1.69025e-36	-0.353645	0.0209711	-1.11717	6.2082e-20	1.07648	2.96567e-18	0.312951	0.0457087	-0.763525	1.41969e-08
ENSG00000035687	ADSS	adenylosuccinate synthase [Source:HGNC Symbol;Acc:HGNC:292]	protein_coding	3.84225e-06	0.123713	0.154257	-0.293337	0.00676892	-0.184766	0.0484934	-0.417051	2.25201e-06	-0.30848	0.00219688	0.108571	0.322741
ENSG00000035862	TIMP2	TIMP metallopeptidase inhibitor 2 [Source:HGNC Symbol;Acc:HGNC:11821]	protein_coding	2.04027e-18	1.70561	4.12507e-15	0.0154252	0.977291	1.12527	3.10116e-06	-1.69019	8.18541e-13	-0.580337	0.0453707	1.10985	2.48139e-05
ENSG00000035928	RFC1	replication factor C (activator 1) 1, 145kDa [Source:HGNC Symbol;Acc:HGNC:9969]	protein_coding	4.52255e-05	-0.412651	3.40093e-05	-0.133186	0.412333	-0.367957	0.000800057	0.279465	0.0119226	0.0446935	0.798631	-0.234771	0.0603931
ENSG00000036054	TBC1D23	TBC1 domain family, member 23 [Source:HGNC Symbol;Acc:HGNC:25622]	protein_coding	6.32952e-07	0.415858	0.0010385	-0.168764	0.418153	0.462664	0.000799407	-0.584622	1.81372e-05	0.0468063	0.833101	0.631428	2.02411e-05
ENSG00000036257	CUL3	cullin 3 [Source:HGNC Symbol;Acc:HGNC:2553]	protein_coding	0.000289478	0.138755	0.0572702	-0.177425	0.0730312	-0.0524893	0.550801	-0.31618	3.10817e-05	-0.191245	0.035456	0.124935	0.168338
ENSG00000036448	MYOM2	myomesin 2 [Source:HGNC Symbol;Acc:HGNC:7614]	protein_coding	0.882746	0.14952	0.58676	0.111913	0.812034	0.188773	0.527903	-0.0376065	0.908455	0.0392531	0.931718	0.0768596	0.831854
ENSG00000036549	ZZZ3	zinc finger, ZZ-type containing 3 [Source:HGNC Symbol;Acc:HGNC:24523]	protein_coding	0.000224306	-0.358035	5.66834e-05	-0.243534	0.046723	-0.291871	0.00304951	0.114501	0.27899	0.0661634	0.652589	-0.0483371	0.71096
ENSG00000036672	USP2	ubiquitin specific peptidase 2 [Source:HGNC Symbol;Acc:HGNC:12618]	protein_coding	4.84376e-07	-1.08042	0.00166122	0.705973	0.103341	0.554042	0.117952	1.78639	3.6926e-07	1.63446	2.8963e-05	-0.151931	0.729517
ENSG00000037042	TUBG2	tubulin, gamma 2 [Source:HGNC Symbol;Acc:HGNC:12419]	protein_coding	8.56427e-19	0.841362	4.93012e-16	0.238781	0.125514	0.766129	1.11597e-11	-0.602581	9.64287e-08	-0.0752336	0.661175	0.527348	2.16078e-05
ENSG00000037241	RPL26L1	ribosomal protein L26-like 1 [Source:HGNC Symbol;Acc:HGNC:17050]	protein_coding	1.35532e-07	-0.508686	0.000301522	-0.11786	0.637033	-0.788341	2.09113e-07	0.390825	0.0122726	-0.279655	0.154158	-0.67048	5.77295e-05
ENSG00000037474	NSUN2	NOP2/Sun RNA methyltransferase family, member 2 [Source:HGNC Symbol;Acc:HGNC:25994]	protein_coding	2.00601e-12	-0.114317	0.163641	-0.399639	2.54988e-05	-0.54865	2.91877e-11	-0.285322	0.000742671	-0.434333	1.39753e-06	-0.149011	0.134453
ENSG00000037637	FBXO42	F-box protein 42 [Source:HGNC Symbol;Acc:HGNC:29249]	protein_coding	0.0178056	0.0382487	0.760948	-0.14156	0.421288	0.235791	0.0520513	-0.179808	0.148257	0.197543	0.183252	0.377351	0.00335142
ENSG00000037749	MFAP3	microfibrillar-associated protein 3 [Source:HGNC Symbol;Acc:HGNC:7034]	protein_coding	0.0035057	-0.0964842	0.555603	-0.55522	0.00349457	-0.172807	0.321741	-0.458736	0.00452734	-0.0763231	0.758339	0.382413	0.0349363
ENSG00000037757	MRI1	methylthioribose-1-phosphate isomerase 1 [Source:HGNC Symbol;Acc:HGNC:28469]	protein_coding	0.033982	0.214954	0.0742127	0.180238	0.318921	0.348731	0.00608906	-0.0347159	0.816593	0.133777	0.433814	0.168493	0.258393
ENSG00000037897	METTL1	methyltransferase like 1 [Source:HGNC Symbol;Acc:HGNC:7030]	protein_coding	1.83875e-56	-1.85041	1.10583e-33	-0.161819	0.530155	-2.08235	1.75505e-35	1.68859	1.53335e-24	-0.231941	0.340283	-1.92053	1.16745e-26
ENSG00000037965	HOXC8	homeobox C8 [Source:HGNC Symbol;Acc:HGNC:5129]	protein_coding	0.0347866	-0.465106	0.0591172	-0.0635839	0.895807	-0.61961	0.0205331	0.401522	0.139491	-0.154504	0.703381	-0.556026	0.0605858
ENSG00000038002	AGA	aspartylglucosaminidase [Source:HGNC Symbol;Acc:HGNC:318]	protein_coding	0.406265	-0.0495067	0.778455	-0.0670738	0.820838	0.184026	0.303858	-0.0175671	0.932853	0.233533	0.275067	0.2511	0.195258
ENSG00000038210	PI4K2B	phosphatidylinositol 4-kinase type 2 beta [Source:HGNC Symbol;Acc:HGNC:18215]	protein_coding	1.31325e-08	-0.766264	1.65587e-07	-0.41645	0.0402591	-0.809576	3.99999e-07	0.349814	0.0368178	-0.0433123	0.874888	-0.393127	0.0328588
ENSG00000038219	BOD1L1	biorientation of chromosomes in cell division 1-like 1 [Source:HGNC Symbol;Acc:HGNC:31792]	protein_coding	0.276987	0.0950702	0.552162	-0.0981765	0.711735	0.198646	0.237252	-0.193247	0.246915	0.103576	0.654812	0.296822	0.098625
ENSG00000038274	MAT2B	methionine adenosyltransferase II, beta [Source:HGNC Symbol;Acc:HGNC:6905]	protein_coding	0.0144564	0.18162	0.131351	-0.124285	0.524348	0.236375	0.0699787	-0.305905	0.016004	0.054755	0.780515	0.36066	0.00936249
ENSG00000038358	EDC4	enhancer of mRNA decapping 4 [Source:HGNC Symbol;Acc:HGNC:17157]	protein_coding	0.0118214	0.195302	0.0407828	0.195798	0.145481	0.312142	0.00211714	0.000495829	0.996852	0.11684	0.387891	0.116344	0.343051
ENSG00000038382	TRIO	trio Rho guanine nucleotide exchange factor [Source:HGNC Symbol;Acc:HGNC:12303]	protein_coding	0.0159724	0.264678	0.0835043	-0.230285	0.321543	0.0594889	0.754062	-0.494964	0.00202338	-0.205189	0.33237	0.289774	0.120205
ENSG00000038427	VCAN	versican [Source:HGNC Symbol;Acc:HGNC:2464]	protein_coding	0.0250323	-0.248833	0.624854	-1.13533	0.0730528	-1.17658	0.0203882	-0.886497	0.0839665	-0.927744	0.130302	-0.0412467	0.952799
ENSG00000038532	CLEC16A	C-type lectin domain family 16, member A [Source:HGNC Symbol;Acc:HGNC:29013]	protein_coding	0.204885	0.171781	0.12615	0.0426912	0.840444	0.19905	0.104101	-0.12909	0.305008	0.0272691	0.889451	0.156359	0.25963
ENSG00000039068	CDH1	cadherin 1, type 1, E-cadherin (epithelial) [Source:HGNC Symbol;Acc:HGNC:1748]	protein_coding	7.91553e-43	1.24923	5.13501e-34	0.044612	0.834943	0.791738	2.73025e-12	-1.20461	3.20842e-27	-0.457487	0.000345	0.747126	1.35227e-09
ENSG00000039123	SKIV2L2	superkiller viralicidic activity 2-like 2 (S. cerevisiae) [Source:HGNC Symbol;Acc:HGNC:18734]	protein_coding	6.54111e-11	-0.451982	8.832e-09	-0.308377	0.00270318	-0.50964	2.37455e-09	0.143605	0.119191	-0.0576583	0.664749	-0.201263	0.0436458
ENSG00000039139	DNAH5	dynein, axonemal, heavy chain 5 [Source:HGNC Symbol;Acc:HGNC:2950]	protein_coding	0.563316	-0.140598	0.533332	0.0900244	0.819893	0.139163	0.580734	0.230622	0.335192	0.279761	0.336832	0.0491386	0.872031
ENSG00000039319	ZFYVE16	zinc finger, FYVE domain containing 16 [Source:HGNC Symbol;Acc:HGNC:20756]	protein_coding	0.164064	0.0354467	0.837173	-0.292642	0.175402	-0.0262999	0.893329	-0.328089	0.0456886	-0.0617466	0.807535	0.266342	0.154595
ENSG00000039523	FAM65A	family with sequence similarity 65, member A [Source:HGNC Symbol;Acc:HGNC:25836]	protein_coding	1.71574e-29	0.931719	6.16083e-21	-0.130368	0.449319	0.506474	5.11212e-06	-1.06209	5.88032e-23	-0.425245	0.000535903	0.636842	1.03325e-07
ENSG00000039560	RAI14	retinoic acid induced 14 [Source:HGNC Symbol;Acc:HGNC:14873]	protein_coding	0.147588	0.404461	0.129921	-0.181376	0.700367	0.177575	0.577508	-0.585837	0.0397957	-0.226886	0.566672	0.358951	0.283575
ENSG00000039650	PNKP	polynucleotide kinase 3'-phosphatase [Source:HGNC Symbol;Acc:HGNC:9154]	protein_coding	0.0189792	0.0455821	0.704972	0.0377142	0.856814	-0.273465	0.0199364	-0.00786795	0.956595	-0.319047	0.0162883	-0.31118	0.0147401
ENSG00000040199	PHLPP2	PH domain and leucine rich repeat protein phosphatase 2 [Source:HGNC Symbol;Acc:HGNC:29149]	protein_coding	5.50832e-05	-0.674148	9.01664e-05	-0.0419589	0.906901	0.0744929	0.734047	0.632189	0.000769302	0.748641	0.000289783	0.116452	0.631903
ENSG00000040275	SPDL1	spindle apparatus coiled-coil protein 1 [Source:HGNC Symbol;Acc:HGNC:26010]	protein_coding	1.32461e-16	-1.36151	9.33438e-12	-0.417512	0.163029	-1.5748	4.43857e-13	0.944	1.90662e-05	-0.213285	0.500082	-1.15728	1.36563e-06
ENSG00000040341	STAU2	staufen double-stranded RNA binding protein 2 [Source:HGNC Symbol;Acc:HGNC:11371]	protein_coding	0.000435245	-0.472959	9.66929e-05	-0.049981	0.833477	-0.137004	0.343663	0.422978	0.00145109	0.335954	0.0329567	-0.0870233	0.610259
ENSG00000040487	PQLC2	PQ loop repeat containing 2 [Source:HGNC Symbol;Acc:HGNC:26001]	protein_coding	7.8627e-18	1.08148	1.17077e-13	-0.0164368	0.962961	0.81496	4.06124e-07	-1.09791	4.3e-12	-0.266515	0.194089	0.831397	2.05904e-06
ENSG00000040531	CTNS	cystinosin, lysosomal cystine transporter [Source:HGNC Symbol;Acc:HGNC:2518]	protein_coding	0.244475	0.224334	0.0722841	0.193417	0.297135	0.149475	0.294256	-0.0309175	0.842405	-0.0748593	0.707562	-0.0439418	0.805667
ENSG00000040608	RTN4R	reticulon 4 receptor [Source:HGNC Symbol;Acc:HGNC:18601]	protein_coding	0.025522	0.298075	0.182938	-0.255257	0.471181	-0.292891	0.24462	-0.553332	0.0186749	-0.590966	0.0303932	-0.0376343	0.910086
ENSG00000040633	PHF23	PHD finger protein 23 [Source:HGNC Symbol;Acc:HGNC:28428]	protein_coding	0.0534461	0.214336	0.0407185	-0.0563713	0.770998	0.0806458	0.521985	-0.270708	0.0163725	-0.13369	0.366237	0.137017	0.30836
ENSG00000040933	INPP4A	inositol polyphosphate-4-phosphatase, type I, 107kDa [Source:HGNC Symbol;Acc:HGNC:6074]	protein_coding	0.000107103	-0.261239	0.0207312	0.222597	0.160318	0.148687	0.246758	0.483836	4.04122e-05	0.409926	0.00229598	-0.0739098	0.632219
ENSG00000041353	RAB27B	RAB27B, member RAS oncogene family [Source:HGNC Symbol;Acc:HGNC:9767]	protein_coding	2.27556e-36	1.48859	2.58402e-20	-0.18602	0.51267	1.56088	5.16335e-19	-1.67461	8.01082e-22	0.0722855	0.802533	1.7469	2.03509e-20
ENSG00000041357	PSMA4	proteasome (prosome, macropain) subunit, alpha type, 4 [Source:HGNC Symbol;Acc:HGNC:9533]	protein_coding	3.63751e-05	-0.318779	0.00683813	-0.0858819	0.688536	-0.546331	1.42112e-05	0.232897	0.0776202	-0.227552	0.1536	-0.46045	0.000906612
ENSG00000041802	LSG1	large 60S subunit nuclear export GTPase 1 [Source:HGNC Symbol;Acc:HGNC:25652]	protein_coding	4.57168e-14	-0.62574	4.23062e-11	-0.210469	0.134607	-0.658071	1.90421e-10	0.415271	7.80944e-05	-0.0323313	0.854774	-0.447602	9.67194e-05
ENSG00000041880	PARP3	poly (ADP-ribose) polymerase family, member 3 [Source:HGNC Symbol;Acc:HGNC:273]	protein_coding	2.37396e-20	0.620699	2.71535e-18	0.167016	0.116069	0.504644	9.02661e-11	-0.453683	4.98643e-09	-0.116055	0.260268	0.337629	8.78766e-05
ENSG00000041982	TNC	tenascin C [Source:HGNC Symbol;Acc:HGNC:5318]	protein_coding	0.0252715	-0.679956	0.186336	-0.378947	0.668144	-1.60888	0.00261945	0.301009	0.619125	-0.92892	0.16135	-1.22993	0.0404658
ENSG00000041988	THAP3	THAP domain containing, apoptosis associated protein 3 [Source:HGNC Symbol;Acc:HGNC:20855]	protein_coding	0.0820203	0.264732	0.14655	0.304245	0.239546	0.449864	0.0181783	0.0395139	0.860472	0.185133	0.470056	0.145619	0.533102
ENSG00000042088	TDP1	tyrosyl-DNA phosphodiesterase 1 [Source:HGNC Symbol;Acc:HGNC:18884]	protein_coding	4.6983e-59	-1.40029	1.31946e-42	-0.0509473	0.794797	-1.13172	8.44739e-25	1.34935	1.75972e-34	0.268574	0.0622494	-1.08077	7.05823e-20
ENSG00000042286	AIFM2	apoptosis-inducing factor, mitochondrion-associated, 2 [Source:HGNC Symbol;Acc:HGNC:21411]	protein_coding	6.31686e-07	-0.458936	0.0382752	-0.243136	0.499449	-1.30162	2.60228e-08	0.2158	0.404586	-0.84268	0.00171186	-1.05848	3.86115e-05
ENSG00000042317	SPATA7	spermatogenesis associated 7 [Source:HGNC Symbol;Acc:HGNC:20423]	protein_coding	8.12738e-06	-0.231978	0.10605	0.411284	0.0208675	0.312597	0.0382842	0.643262	8.47274e-06	0.544576	0.000904929	-0.0986863	0.596182
ENSG00000042429	MED17	mediator complex subunit 17 [Source:HGNC Symbol;Acc:HGNC:2375]	protein_coding	6.03725e-05	0.136624	0.124244	-0.274756	0.0151346	-0.0938152	0.358279	-0.411379	6.41444e-06	-0.230439	0.0355441	0.18094	0.0918808
ENSG00000042445	RETSAT	retinol saturase (all-trans-retinol 13,14-reductase) [Source:HGNC Symbol;Acc:HGNC:25991]	protein_coding	1.64161e-16	0.616639	4.16969e-09	-0.08612	0.658682	0.680454	2.50008e-09	-0.702759	6.26838e-10	0.063815	0.722446	0.766574	5.22672e-10
ENSG00000042493	CAPG	capping protein (actin filament), gelsolin-like [Source:HGNC Symbol;Acc:HGNC:1474]	protein_coding	4.35903e-11	0.813559	2.42402e-09	-0.0489598	0.862364	0.392389	0.011849	-0.862519	5.66833e-09	-0.42117	0.0169419	0.441349	0.00934729
ENSG00000042753	AP2S1	adaptor-related protein complex 2, sigma 1 subunit [Source:HGNC Symbol;Acc:HGNC:565]	protein_coding	1.41464e-11	-0.478204	3.93018e-05	-0.112365	0.582156	-0.830892	2.79889e-11	0.365839	0.00450963	-0.352689	0.0189788	-0.718527	1.36868e-07
ENSG00000042980	ADAM28	ADAM metallopeptidase domain 28 [Source:HGNC Symbol;Acc:HGNC:206]	protein_coding	6.79041e-24	1.01322	2.82615e-17	-0.0597918	0.804837	0.758348	9.2688e-09	-1.07302	1.49232e-16	-0.254876	0.127393	0.81814	1.07852e-08
ENSG00000043039	BARX2	BARX homeobox 2 [Source:HGNC Symbol;Acc:HGNC:956]	protein_coding	0.0528111	-0.419717	0.376127	-0.517458	0.470553	-1.36448	0.0083115	-0.0977407	0.867176	-0.944767	0.14511	-0.847026	0.157003
ENSG00000043093	DCUN1D1	DCN1, defective in cullin neddylation 1, domain containing 1 [Source:HGNC Symbol;Acc:HGNC:18184]	protein_coding	0.0170768	-0.26789	0.0381763	-0.364995	0.0329074	-0.323449	0.0216656	-0.0971053	0.529711	-0.0555595	0.798976	0.0415459	0.826794
ENSG00000043143	JADE2	jade family PHD finger 2 [Source:HGNC Symbol;Acc:HGNC:22984]	protein_coding	0.00559991	0.274926	0.0622674	-0.0932327	0.726802	0.378876	0.0172156	-0.368158	0.0198291	0.10395	0.652589	0.472108	0.00597687
ENSG00000043355	ZIC2	Zic family member 2 [Source:HGNC Symbol;Acc:HGNC:12873]	protein_coding	3.67306e-11	-2.45085	1.98538e-10	-0.392501	0.497222	-1.65571	3.17039e-05	2.05835	7.79171e-07	0.795141	0.158497	-1.26321	0.00426014
ENSG00000043514	TRIT1	tRNA isopentenyltransferase 1 [Source:HGNC Symbol;Acc:HGNC:20286]	protein_coding	2.17272e-06	-0.585739	1.05322e-07	-0.238247	0.127341	-0.246829	0.0462585	0.347491	0.00493003	0.33891	0.0186921	-0.00858152	0.959317
ENSG00000043591	ADRB1	adrenoceptor beta 1 [Source:HGNC Symbol;Acc:HGNC:285]	protein_coding	0.0390268	0.1863	0.778674	0.677501	0.448121	1.44765	0.0142167	0.491201	0.457083	1.26135	0.0732157	0.770151	0.249064
ENSG00000044012	GUCA2B	guanylate cyclase activator 2B (uroguanylin) [Source:HGNC Symbol;Acc:HGNC:4683]	protein_coding	3.92774e-209	5.25948	1.17515e-140	1.84113	6.25637e-13	5.57075	2.5372e-144	-3.41834	1.43421e-73	0.311274	0.170787	3.72962	4.04657e-78
ENSG00000044090	CUL7	cullin 7 [Source:HGNC Symbol;Acc:HGNC:21024]	protein_coding	2.74938e-05	0.0228041	0.835376	0.195869	0.144127	0.415548	2.8954e-05	0.173065	0.100087	0.392744	0.000375211	0.219679	0.0539182
ENSG00000044115	CTNNA1	catenin (cadherin-associated protein), alpha 1, 102kDa [Source:HGNC Symbol;Acc:HGNC:2509]	protein_coding	1.92014e-51	0.962889	8.13216e-34	-0.160461	0.196796	0.600678	7.09524e-12	-1.12335	4.2088e-39	-0.36221	0.000235473	0.761139	5.9703e-16
ENSG00000044446	PHKA2	phosphorylase kinase, alpha 2 (liver) [Source:HGNC Symbol;Acc:HGNC:8926]	protein_coding	1.43101e-51	-1.48338	1.51467e-37	0.213894	0.221678	-0.795859	2.08024e-10	1.69727	1.40517e-42	0.687522	1.00335e-06	-1.00975	4.51541e-14
ENSG00000044459	CNTLN	centlein, centrosomal protein [Source:HGNC Symbol;Acc:HGNC:23432]	protein_coding	8.11427e-15	-3.35218	1.70229e-06	-0.206897	0.841087	-7.14434	1.13938e-07	3.14529	2.13449e-05	-3.79216	0.0267811	-6.93744	5.67038e-07
ENSG00000044574	HSPA5	heat shock 70kDa protein 5 (glucose-regulated protein, 78kDa) [Source:HGNC Symbol;Acc:HGNC:5238]	protein_coding	0.0240256	0.265957	0.026848	-0.0809887	0.711261	0.121763	0.3906	-0.346945	0.00720093	-0.144194	0.402632	0.202752	0.179466
ENSG00000046604	DSG2	desmoglein 2 [Source:HGNC Symbol;Acc:HGNC:3049]	protein_coding	3.55474e-28	1.02723	5.56142e-15	-0.392912	0.0345846	0.797854	3.60394e-08	-1.42014	1.12656e-23	-0.229378	0.226544	1.19077	1.30386e-14
ENSG00000046647	GEMIN8	gem (nuclear organelle) associated protein 8 [Source:HGNC Symbol;Acc:HGNC:26044]	protein_coding	0.799874	0.1603	0.392002	0.0504305	0.886989	0.105428	0.625379	-0.10987	0.605159	-0.0548728	0.859034	0.0549972	0.831191
ENSG00000046651	OFD1	oral-facial-digital syndrome 1 [Source:HGNC Symbol;Acc:HGNC:2567]	protein_coding	7.88429e-07	0.331584	0.000252847	0.141917	0.32302	0.489359	4.43077e-07	-0.189667	0.0642681	0.157775	0.210169	0.347442	0.00126383
ENSG00000047056	WDR37	WD repeat domain 37 [Source:HGNC Symbol;Acc:HGNC:31406]	protein_coding	3.45361e-13	0.617073	2.91915e-10	-0.0600852	0.754371	0.384956	0.000453715	-0.677158	1.90539e-10	-0.232117	0.0786929	0.445041	0.000182947
ENSG00000047188	YTHDC2	YTH domain containing 2 [Source:HGNC Symbol;Acc:HGNC:24721]	protein_coding	0.12615	-0.23105	0.0564693	-0.2431	0.154533	-0.192097	0.157734	-0.0120495	0.940835	0.0389529	0.853726	0.0510024	0.769727
ENSG00000047230	CTPS2	CTP synthase 2 [Source:HGNC Symbol;Acc:HGNC:2520]	protein_coding	0.0335221	-0.208343	0.0180536	-0.101842	0.475944	-0.226513	0.0188465	0.106501	0.295538	-0.0181705	0.910179	-0.124672	0.269688
ENSG00000047249	ATP6V1H	ATPase, H+ transporting, lysosomal 50/57kDa, V1 subunit H [Source:HGNC Symbol;Acc:HGNC:18303]	protein_coding	0.00901818	0.142137	0.147766	-0.156644	0.276691	-0.118845	0.284712	-0.298781	0.00346132	-0.260982	0.0296123	0.0377994	0.787132
ENSG00000047315	POLR2B	polymerase (RNA) II (DNA directed) polypeptide B, 140kDa [Source:HGNC Symbol;Acc:HGNC:9188]	protein_coding	1.13342e-08	-0.417831	1.79683e-07	-0.292446	0.00608048	-0.452768	2.08221e-07	0.125385	0.185236	-0.0349369	0.806199	-0.160322	0.122305
ENSG00000047346	FAM214A	family with sequence similarity 214, member A [Source:HGNC Symbol;Acc:HGNC:25609]	protein_coding	1.9087e-26	1.30967	1.78014e-17	0.471242	0.0303515	1.60732	3.58224e-22	-0.838429	6.99205e-07	0.297654	0.167404	1.13608	3.85666e-10
ENSG00000047365	ARAP2	ArfGAP with RhoGAP domain, ankyrin repeat and PH domain 2 [Source:HGNC Symbol;Acc:HGNC:16924]	protein_coding	1.60704e-18	0.96174	8.29375e-09	-0.598374	0.00819097	0.640429	0.000608322	-1.56011	3.34533e-18	-0.321311	0.169383	1.2388	3.05394e-10
ENSG00000047410	TPR	translocated promoter region, nuclear basket protein [Source:HGNC Symbol;Acc:HGNC:12017]	protein_coding	0.00187479	-0.309259	0.000552231	-0.126551	0.380036	-0.265552	0.00763502	0.182708	0.0717294	0.0437065	0.777019	-0.139001	0.23336
ENSG00000047457	CP	ceruloplasmin (ferroxidase) [Source:HGNC Symbol;Acc:HGNC:2295]	protein_coding	9.44291e-12	2.58221	3.53197e-08	0.924975	0.197515	3.44471	1.00614e-11	-1.65723	0.0014906	0.862501	0.191773	2.51974	6.41534e-06
ENSG00000047578	KIAA0556	KIAA0556 [Source:HGNC Symbol;Acc:HGNC:29068]	protein_coding	1.88971e-14	0.615523	1.09199e-11	0.149927	0.306717	0.602948	1.02299e-09	-0.465596	2.82083e-06	-0.0125754	0.943024	0.45302	3.19341e-05
ENSG00000047579	DTNBP1	dystrobrevin binding protein 1 [Source:HGNC Symbol;Acc:HGNC:17328]	protein_coding	0.30819	0.128734	0.549995	0.368535	0.193787	0.092198	0.708708	0.239801	0.284441	-0.0365362	0.918398	-0.276337	0.267526
ENSG00000047597	XK	X-linked Kx blood group [Source:HGNC Symbol;Acc:HGNC:12811]	protein_coding	0.00527785	-0.584776	0.000476577	-0.268063	0.306738	-0.232835	0.237946	0.316712	0.0971685	0.351941	0.119535	0.0352288	0.89024
ENSG00000047621	C12orf4	chromosome 12 open reading frame 4 [Source:HGNC Symbol;Acc:HGNC:1184]	protein_coding	0.147498	-0.123401	0.372083	-0.176118	0.383482	-0.305877	0.0330955	-0.052717	0.746834	-0.182475	0.326582	-0.129758	0.455505
ENSG00000047634	SCML1	sex comb on midleg-like 1 (Drosophila) [Source:HGNC Symbol;Acc:HGNC:10580]	protein_coding	2.9935e-54	-3.44025	1.21591e-41	-0.942452	0.00342023	-3.39549	6.94686e-35	2.4978	1.6727e-19	0.0447558	0.93223	-2.45304	2.72402e-16
ENSG00000047644	WWC3	WWC family member 3 [Source:HGNC Symbol;Acc:HGNC:29237]	protein_coding	3.33826e-08	0.550067	8.41554e-06	-0.190613	0.340925	0.210817	0.148349	-0.740681	2.62168e-08	-0.339251	0.0349043	0.40143	0.00842985
ENSG00000047648	ARHGAP6	Rho GTPase activating protein 6 [Source:HGNC Symbol;Acc:HGNC:676]	protein_coding	0.00641677	1.18423	0.014027	0.138344	0.890495	-0.408704	0.508172	-1.04589	0.0485114	-1.59294	0.00904945	-0.547048	0.414874
ENSG00000047849	MAP4	microtubule-associated protein 4 [Source:HGNC Symbol;Acc:HGNC:6862]	protein_coding	0.82906	0.089301	0.443442	0.0091482	0.971233	0.0338452	0.807261	-0.0801528	0.537727	-0.0554558	0.757222	0.024697	0.878449
ENSG00000047932	GOPC	golgi-associated PDZ and coiled-coil motif containing [Source:HGNC Symbol;Acc:HGNC:17643]	protein_coding	0.046962	-0.208328	0.0650154	-0.307181	0.0386635	-0.167173	0.188319	-0.0988531	0.454365	0.0411551	0.830622	0.140008	0.333448
ENSG00000048028	USP28	ubiquitin specific peptidase 28 [Source:HGNC Symbol;Acc:HGNC:12625]	protein_coding	6.68307e-49	-1.76748	7.8523e-43	0.0382837	0.879816	-0.598031	9.35383e-06	1.80577	2.04215e-39	1.16945	5.69394e-15	-0.636314	1.2631e-05
ENSG00000048052	HDAC9	histone deacetylase 9 [Source:HGNC Symbol;Acc:HGNC:14065]	protein_coding	4.31875e-36	1.77601	1.71569e-21	-0.167478	0.639933	1.77442	1.54228e-18	-1.94349	1.19043e-21	-0.00159175	0.997228	1.9419	7.82629e-19
ENSG00000048140	TSPAN17	tetraspanin 17 [Source:HGNC Symbol;Acc:HGNC:13594]	protein_coding	6.84186e-05	-0.385622	0.000418471	0.00884963	0.972982	-0.353706	0.00340805	0.394471	0.000916039	0.0319159	0.873864	-0.362556	0.00601868
ENSG00000048162	NOP16	NOP16 nucleolar protein [Source:HGNC Symbol;Acc:HGNC:26934]	protein_coding	1.2067e-31	-1.2377	1.67863e-17	-0.580488	0.00229458	-1.75922	1.94103e-28	0.657207	5.20037e-05	-0.521521	0.00687358	-1.17873	1.49758e-11
ENSG00000048342	CC2D2A	coiled-coil and C2 domain containing 2A [Source:HGNC Symbol;Acc:HGNC:29253]	protein_coding	2.7727e-15	-1.35927	4.19934e-10	0.471633	0.111103	-0.469896	0.0518693	1.8309	1.57769e-15	0.88937	0.00109322	-0.94153	0.000145257
ENSG00000048392	RRM2B	ribonucleotide reductase M2 B (TP53 inducible) [Source:HGNC Symbol;Acc:HGNC:17296]	protein_coding	0.0874909	-0.195402	0.124149	-0.302603	0.0730071	-0.0755364	0.618239	-0.107201	0.46671	0.119866	0.51943	0.227067	0.14051
ENSG00000048405	ZNF800	zinc finger protein 800 [Source:HGNC Symbol;Acc:HGNC:27267]	protein_coding	1.08548e-05	0.178912	0.220127	-0.548648	0.00199229	-0.144026	0.385657	-0.727559	8.29803e-07	-0.322937	0.0758964	0.404622	0.0171278
ENSG00000048471	SNX29	sorting nexin 29 [Source:HGNC Symbol;Acc:HGNC:30542]	protein_coding	1.88842e-06	0.240622	0.205346	-0.692395	0.00298253	-0.439773	0.0301208	-0.933017	1.22096e-06	-0.680395	0.00188106	0.252622	0.290653
ENSG00000048544	MRPS10	mitochondrial ribosomal protein S10 [Source:HGNC Symbol;Acc:HGNC:14502]	protein_coding	4.94013e-24	0.44585	1.38156e-07	-0.408752	0.000168253	-0.272047	0.00488036	-0.854602	4.7776e-21	-0.717897	9.27609e-14	0.136705	0.231073
ENSG00000048649	RSF1	remodeling and spacing factor 1 [Source:HGNC Symbol;Acc:HGNC:18118]	protein_coding	0.000674664	0.297507	0.00626765	-0.0945724	0.623099	0.255806	0.0351628	-0.392079	0.000807101	-0.0417006	0.824989	0.350378	0.00713059
ENSG00000048707	VPS13D	vacuolar protein sorting 13 homolog D (S. cerevisiae) [Source:HGNC Symbol;Acc:HGNC:23595]	protein_coding	1.78115e-10	0.467952	2.87898e-06	-0.0788105	0.670834	0.4919	6.58313e-06	-0.546763	4.36073e-07	0.0239478	0.898379	0.570711	1.31157e-06
ENSG00000048828	FAM120A	family with sequence similarity 120A [Source:HGNC Symbol;Acc:HGNC:13247]	protein_coding	0.501238	-0.0836128	0.359925	-0.104098	0.454347	-0.120807	0.221733	-0.0204851	0.852592	-0.0371937	0.798083	-0.0167087	0.896847
ENSG00000048991	R3HDM1	R3H domain containing 1 [Source:HGNC Symbol;Acc:HGNC:9757]	protein_coding	1.59095e-46	-1.60865	2.93643e-33	-0.221844	0.297502	-1.53805	3.40174e-26	1.38681	1.35424e-21	0.0705991	0.771639	-1.31621	6.48714e-17
ENSG00000049089	COL9A2	collagen, type IX, alpha 2 [Source:HGNC Symbol;Acc:HGNC:2218]	protein_coding	0.126637	0.00780555	0.991345	1.05899	0.231069	1.01867	0.131314	1.05119	0.114443	1.01086	0.212963	-0.0403242	0.964113
ENSG00000049130	KITLG	KIT ligand [Source:HGNC Symbol;Acc:HGNC:6343]	protein_coding	3.80674e-49	-2.58696	2.27642e-47	-0.358979	0.198022	-1.66322	2.03178e-17	2.22799	2.03763e-30	0.923747	2.61094e-05	-1.30424	1.19216e-09
ENSG00000049167	ERCC8	excision repair cross-complementation group 8 [Source:HGNC Symbol;Acc:HGNC:3439]	protein_coding	3.49198e-06	-0.694057	4.07036e-05	-0.0443426	0.89639	-0.653113	0.000406175	0.649714	0.000406233	0.0409434	0.900066	-0.608771	0.00256526
ENSG00000049192	ADAMTS6	ADAM metallopeptidase with thrombospondin type 1 motif, 6 [Source:HGNC Symbol;Acc:HGNC:222]	protein_coding	1.7192e-13	-3.58227	1.33182e-07	-0.72464	0.364602	-4.94119	9.92687e-07	2.85763	8.79008e-05	-1.35892	0.372648	-4.21655	7.26575e-05
ENSG00000049239	H6PD	hexose-6-phosphate dehydrogenase (glucose 1-dehydrogenase) [Source:HGNC Symbol;Acc:HGNC:4795]	protein_coding	0.0204748	0.100033	0.231603	0.0399906	0.789799	0.244192	0.00455127	-0.0600419	0.530985	0.144159	0.180143	0.204201	0.0328863
ENSG00000049245	VAMP3	vesicle-associated membrane protein 3 [Source:HGNC Symbol;Acc:HGNC:12644]	protein_coding	0.00105802	0.259058	0.0109849	-0.150647	0.346253	0.0887101	0.471046	-0.409705	0.000157355	-0.170348	0.223946	0.239357	0.0554473
ENSG00000049246	PER3	period circadian clock 3 [Source:HGNC Symbol;Acc:HGNC:8847]	protein_coding	2.5943e-07	-0.993879	4.88187e-08	-0.210789	0.498172	-0.59194	0.00384239	0.78309	9.46762e-05	0.401939	0.107703	-0.381151	0.103609
ENSG00000049249	TNFRSF9	tumor necrosis factor receptor superfamily, member 9 [Source:HGNC Symbol;Acc:HGNC:11924]	protein_coding	0.228243	0.331552	0.516722	-0.319763	0.713336	-0.687267	0.233984	-0.651315	0.231996	-1.01882	0.12229	-0.367504	0.596669
ENSG00000049283	EPN3	epsin 3 [Source:HGNC Symbol;Acc:HGNC:18235]	protein_coding	1.74997e-06	-0.656254	0.000901441	0.450647	0.107644	-0.0320296	0.903493	1.1069	1.2064e-07	0.624224	0.0115332	-0.482677	0.0465872
ENSG00000049323	LTBP1	latent transforming growth factor beta binding protein 1 [Source:HGNC Symbol;Acc:HGNC:6714]	protein_coding	0.000174121	-0.8236	0.00206979	0.0732159	0.895451	0.373088	0.230979	0.896816	0.00200497	1.19669	0.000144707	0.299872	0.399977
ENSG00000049449	RCN1	reticulocalbin 1, EF-hand calcium binding domain [Source:HGNC Symbol;Acc:HGNC:9934]	protein_coding	2.78434e-11	-0.694132	7.22501e-08	-0.126933	0.580108	-0.797589	1.2666e-08	0.567199	6.25029e-05	-0.103457	0.624211	-0.670656	1.32074e-05
ENSG00000049540	ELN	elastin [Source:HGNC Symbol;Acc:HGNC:3327]	protein_coding	0.00017366	-1.36763	0.00728557	0.563768	0.461158	-1.23366	0.0273564	1.93139	0.000287081	0.133968	0.88989	-1.79743	0.002064
ENSG00000049541	RFC2	replication factor C (activator 1) 2, 40kDa [Source:HGNC Symbol;Acc:HGNC:9970]	protein_coding	2.96382e-27	-0.888355	7.75675e-16	0.0023389	0.993765	-0.980732	2.74021e-16	0.890694	8.2938e-14	-0.0923772	0.616962	-0.983071	3.01191e-14
ENSG00000049618	ARID1B	AT rich interactive domain 1B (SWI1-like) [Source:HGNC Symbol;Acc:HGNC:18040]	protein_coding	0.931173	0.0480037	0.700257	-0.00703241	0.97876	-0.0207387	0.886477	-0.0550362	0.6879	-0.0687425	0.70174	-0.0137063	0.933347
ENSG00000049656	CLPTM1L	CLPTM1-like [Source:HGNC Symbol;Acc:HGNC:24308]	protein_coding	0.0069573	-0.17861	0.0320992	0.00770326	0.96761	-0.232855	0.00993147	0.186314	0.0403966	-0.0542449	0.686511	-0.240558	0.0150141
ENSG00000049759	NEDD4L	neural precursor cell expressed, developmentally down-regulated 4-like, E3 ubiquitin protein ligase [Source:HGNC Symbol;Acc:HGNC:7728]	protein_coding	0.26816	0.0973381	0.347727	0.0987542	0.545961	0.198839	0.0670802	0.00141609	0.991388	0.101501	0.480071	0.100085	0.438891
ENSG00000049769	PPP1R3F	protein phosphatase 1, regulatory subunit 3F [Source:HGNC Symbol;Acc:HGNC:14944]	protein_coding	0.0219676	0.554863	0.0800089	0.82916	0.0404885	0.847117	0.0104787	0.274297	0.437369	0.292254	0.516459	0.0179569	0.967888
ENSG00000049860	HEXB	hexosaminidase B (beta polypeptide) [Source:HGNC Symbol;Acc:HGNC:4879]	protein_coding	2.68994e-17	-0.860201	1.68925e-13	-0.116193	0.580086	-0.787223	7.03594e-10	0.744008	5.27552e-09	0.0729781	0.71687	-0.67103	1.61738e-06
ENSG00000049883	PTCD2	pentatricopeptide repeat domain 2 [Source:HGNC Symbol;Acc:HGNC:25734]	protein_coding	3.98738e-21	-1.25898	2.67426e-18	-0.0850034	0.752991	-0.8292	1.14045e-07	1.17398	5.30986e-14	0.429781	0.0269489	-0.744196	1.31656e-05
ENSG00000050130	JKAMP	JNK1/MAPK8-associated membrane protein [Source:HGNC Symbol;Acc:HGNC:20184]	protein_coding	1.32531e-22	0.525318	1.51135e-13	-0.196989	0.0548678	0.11017	0.202871	-0.722307	5.27028e-21	-0.415148	8.6721e-07	0.307159	0.000453444
ENSG00000050165	DKK3	dickkopf WNT signaling pathway inhibitor 3 [Source:HGNC Symbol;Acc:HGNC:2893]	protein_coding	0.0451586	-0.229649	0.542414	0.678476	0.157787	-0.0715283	0.87239	0.908125	0.0132334	0.158121	0.78474	-0.750004	0.0685499
ENSG00000050327	ARHGEF5	Rho guanine nucleotide exchange factor (GEF) 5 [Source:HGNC Symbol;Acc:HGNC:13209]	protein_coding	7.69021e-40	0.970508	8.22097e-31	0.0261304	0.88687	0.666694	5.80169e-13	-0.944378	4.27717e-25	-0.303814	0.00467428	0.640563	1.89689e-10
ENSG00000050344	NFE2L3	nuclear factor, erythroid 2-like 3 [Source:HGNC Symbol;Acc:HGNC:7783]	protein_coding	5.83474e-15	-0.734921	7.07634e-09	-0.318844	0.0791258	-1.03445	5.60839e-14	0.416078	0.00351273	-0.299526	0.0876344	-0.715603	2.53436e-06
ENSG00000050393	MCUR1	mitochondrial calcium uniporter regulator 1 [Source:HGNC Symbol;Acc:HGNC:21097]	protein_coding	0.000418197	-0.290106	0.0035502	-0.0980734	0.557112	-0.392481	0.000259975	0.192033	0.0861542	-0.102375	0.502763	-0.294408	0.0143476
ENSG00000050405	LIMA1	LIM domain and actin binding 1 [Source:HGNC Symbol;Acc:HGNC:24636]	protein_coding	0.573447	-0.140482	0.199823	-0.0822931	0.659028	-0.055972	0.670844	0.0581893	0.654291	0.0845104	0.605187	0.0263211	0.866955
ENSG00000050426	LETMD1	LETM1 domain containing 1 [Source:HGNC Symbol;Acc:HGNC:24241]	protein_coding	6.12444e-15	-0.681313	4.32668e-14	-0.0288746	0.879507	-0.130778	0.228451	0.652439	2.7027e-11	0.550535	2.3325e-07	-0.101904	0.413751
ENSG00000050438	SLC4A8	solute carrier family 4, sodium bicarbonate cotransporter, member 8 [Source:HGNC Symbol;Acc:HGNC:11034]	protein_coding	0.00719817	-0.18296	0.679631	1.05499	0.0375231	0.336956	0.466637	1.23795	0.00261338	0.519916	0.349013	-0.718037	0.126464
ENSG00000050748	MAPK9	mitogen-activated protein kinase 9 [Source:HGNC Symbol;Acc:HGNC:6886]	protein_coding	0.000203421	-0.41866	1.44744e-05	-0.23155	0.0901015	-0.209788	0.0567837	0.18711	0.0925511	0.208872	0.1137	0.0217625	0.883097
ENSG00000050820	BCAR1	breast cancer anti-estrogen resistance 1 [Source:HGNC Symbol;Acc:HGNC:971]	protein_coding	2.75512e-62	1.21097	3.8844e-45	-0.084558	0.593695	0.678353	8.9298e-13	-1.29553	4.16001e-44	-0.532619	1.92684e-07	0.762911	9.87125e-14
ENSG00000051009	FAM160A2	family with sequence similarity 160, member A2 [Source:HGNC Symbol;Acc:HGNC:25378]	protein_coding	6.52467e-46	0.870675	9.97131e-34	-0.0775073	0.55081	0.375101	3.48863e-06	-0.948182	4.54623e-34	-0.495574	4.3632e-09	0.452608	2.07227e-07
ENSG00000051108	HERPUD1	homocysteine-inducible, endoplasmic reticulum stress-inducible, ubiquitin-like domain member 1 [Source:HGNC Symbol;Acc:HGNC:13744]	protein_coding	9.74987e-69	1.23852	3.17164e-48	0.131052	0.361728	1.14894	9.76551e-36	-1.10747	2.38238e-33	-0.0895801	0.502095	1.01789	1.56486e-24
ENSG00000051128	HOMER3	homer homolog 3 (Drosophila) [Source:HGNC Symbol;Acc:HGNC:17514]	protein_coding	0.00479974	0.709411	0.00327447	-0.00967378	0.987164	0.11207	0.718786	-0.719084	0.0063488	-0.597341	0.056624	0.121743	0.730947
ENSG00000051180	RAD51	RAD51 recombinase [Source:HGNC Symbol;Acc:HGNC:9817]	protein_coding	2.85812e-109	-3.03387	9.73578e-68	0.108997	0.684659	-2.37488	5.50954e-42	3.14286	8.77457e-66	0.658988	0.00701503	-2.48388	3.6318e-41
ENSG00000051341	POLQ	polymerase (DNA directed), theta [Source:HGNC Symbol;Acc:HGNC:9186]	protein_coding	1.65544e-85	-4.66332	2.98795e-63	-0.260376	0.561504	-4.43516	1.69937e-50	4.40295	8.72948e-50	0.228163	0.652686	-4.17478	1.02426e-39
ENSG00000051382	PIK3CB	phosphatidylinositol-4,5-bisphosphate 3-kinase, catalytic subunit beta [Source:HGNC Symbol;Acc:HGNC:8976]	protein_coding	9.03846e-19	0.593965	2.92718e-09	-0.355086	0.00899311	0.306086	0.00724401	-0.949051	1.06787e-18	-0.28788	0.0277773	0.661172	2.576e-08
ENSG00000051523	CYBA	cytochrome b-245, alpha polypeptide [Source:HGNC Symbol;Acc:HGNC:2577]	protein_coding	0.00459163	0.491374	0.000831685	0.261908	0.243888	0.110032	0.548932	-0.229466	0.176486	-0.381342	0.04512	-0.151876	0.448749
ENSG00000051596	THOC3	THO complex 3 [Source:HGNC Symbol;Acc:HGNC:19072]	protein_coding	3.33573e-22	-1.01136	4.35224e-15	0.143151	0.520831	-0.759286	7.89609e-08	1.15451	9.77209e-17	0.252071	0.171031	-0.902437	2.98207e-09
ENSG00000051620	HEBP2	heme binding protein 2 [Source:HGNC Symbol;Acc:HGNC:15716]	protein_coding	3.47545e-09	0.515907	4.92049e-08	0.0427805	0.82313	0.405546	0.000109124	-0.473126	4.65334e-06	-0.110361	0.441291	0.362765	0.0016517
ENSG00000051825	MPHOSPH9	M-phase phosphoprotein 9 [Source:HGNC Symbol;Acc:HGNC:7215]	protein_coding	2.17085e-61	-2.22217	1.3104e-43	-0.107044	0.717274	-1.94899	1.2682e-29	2.11513	1.73573e-34	0.273186	0.26615	-1.84194	2.88672e-23
ENSG00000052126	PLEKHA5	pleckstrin homology domain containing, family A member 5 [Source:HGNC Symbol;Acc:HGNC:30036]	protein_coding	3.66255e-23	-0.790922	7.80901e-19	0.0810413	0.612617	-0.320741	0.00135056	0.871963	1.14278e-19	0.470181	1.44928e-05	-0.401782	0.000182511
ENSG00000052344	PRSS8	protease, serine, 8 [Source:HGNC Symbol;Acc:HGNC:9491]	protein_coding	1.28702e-23	1.32651	1.30266e-22	0.561121	0.00194255	1.16642	3.41029e-15	-0.76539	3.17391e-07	-0.160093	0.443926	0.605297	0.000276091
ENSG00000052723	SIKE1	suppressor of IKBKE 1 [Source:HGNC Symbol;Acc:HGNC:26119]	protein_coding	0.12536	-0.219277	0.0642146	-0.232474	0.161346	-0.206109	0.116428	-0.0131976	0.933433	0.0131678	0.951948	0.0263654	0.879458
ENSG00000052749	RRP12	ribosomal RNA processing 12 homolog (S. cerevisiae) [Source:HGNC Symbol;Acc:HGNC:29100]	protein_coding	1.08498e-10	-0.565097	3.75345e-06	-0.316696	0.0653322	-0.865098	5.6165e-11	0.248401	0.0776865	-0.300001	0.0707779	-0.548402	0.000199163
ENSG00000052795	FNIP2	folliculin interacting protein 2 [Source:HGNC Symbol;Acc:HGNC:29280]	protein_coding	2.71215e-11	0.482659	0.000959896	0.0315606	0.918574	0.955203	5.77048e-10	-0.451099	0.00488779	0.472544	0.00887061	0.923643	3.70581e-08
ENSG00000052802	MSMO1	methylsterol monooxygenase 1 [Source:HGNC Symbol;Acc:HGNC:10545]	protein_coding	0.000147127	0.94151	0.0029037	-0.2839	0.610893	-0.193102	0.627069	-1.22541	0.000317497	-1.13461	0.0031999	0.0907981	0.84923
ENSG00000052841	TTC17	tetratricopeptide repeat domain 17 [Source:HGNC Symbol;Acc:HGNC:25596]	protein_coding	0.00911112	0.185691	0.0845129	-0.0176885	0.937149	0.303513	0.00807594	-0.203379	0.0823538	0.117822	0.442674	0.321202	0.0103626
ENSG00000053108	FSTL4	follistatin-like 4 [Source:HGNC Symbol;Acc:HGNC:21389]	protein_coding	0.242569	0.185788	0.794599	-1.15244	0.237119	-0.405847	0.603612	-1.33823	0.0651558	-0.591636	0.538225	0.746594	0.392701
ENSG00000053254	FOXN3	forkhead box N3 [Source:HGNC Symbol;Acc:HGNC:1928]	protein_coding	5.64408e-09	-1.07311	2.58741e-08	-0.0308783	0.942035	0.055182	0.829549	1.04224	6.59382e-07	1.1283	5.76086e-07	0.0860603	0.765829
ENSG00000053371	AKR7A2	aldo-keto reductase family 7, member A2 (aflatoxin aldehyde reductase) [Source:HGNC Symbol;Acc:HGNC:389]	protein_coding	2.77499e-05	0.506725	5.52715e-06	0.188028	0.285546	0.388486	0.00178087	-0.318697	0.0106125	-0.118238	0.488312	0.200458	0.16655
ENSG00000053372	MRTO4	mRNA turnover 4 homolog (S. cerevisiae) [Source:HGNC Symbol;Acc:HGNC:18477]	protein_coding	1.26847e-31	-1.02799	6.5906e-19	-0.288093	0.0823706	-1.29532	8.84997e-25	0.739895	5.61987e-09	-0.267327	0.104184	-1.00722	2.32047e-13
ENSG00000053501	USE1	unconventional SNARE in the ER 1 homolog (S. cerevisiae) [Source:HGNC Symbol;Acc:HGNC:30882]	protein_coding	0.423673	0.190882	0.232561	0.165151	0.510181	-0.0101242	0.959742	-0.025731	0.897623	-0.201006	0.356197	-0.175275	0.381671
ENSG00000053747	LAMA3	laminin, alpha 3 [Source:HGNC Symbol;Acc:HGNC:6483]	protein_coding	0.0367197	1.01776	0.0816283	-0.68674	0.463266	0.328873	0.64416	-1.7045	0.00571185	-0.688883	0.403419	1.01561	0.157898
ENSG00000053770	AP5M1	adaptor-related protein complex 5, mu 1 subunit [Source:HGNC Symbol;Acc:HGNC:20192]	protein_coding	0.000978137	-0.469751	7.69372e-05	-0.255064	0.140978	-0.23783	0.0819328	0.214687	0.117203	0.231921	0.157463	0.0172335	0.925143
ENSG00000053900	ANAPC4	anaphase promoting complex subunit 4 [Source:HGNC Symbol;Acc:HGNC:19990]	protein_coding	2.38816e-05	-0.569636	1.39013e-06	-0.288072	0.0835972	-0.294315	0.027283	0.281564	0.036564	0.275321	0.08646	-0.00624287	0.973302
ENSG00000053918	KCNQ1	potassium channel, voltage gated KQT-like subfamily Q, member 1 [Source:HGNC Symbol;Acc:HGNC:6294]	protein_coding	6.20806e-22	-3.53782	2.54966e-17	0.548242	0.340503	-1.51407	0.000223572	4.08606	1.61216e-20	2.02375	8.00935e-05	-2.06231	2.09933e-06
ENSG00000054116	TRAPPC3	trafficking protein particle complex 3 [Source:HGNC Symbol;Acc:HGNC:19942]	protein_coding	0.208026	-0.0760877	0.557548	-0.0351303	0.882824	-0.251372	0.0563623	0.0409574	0.784013	-0.175284	0.290132	-0.216241	0.143205
ENSG00000054118	THRAP3	thyroid hormone receptor associated protein 3 [Source:HGNC Symbol;Acc:HGNC:22964]	protein_coding	0.000148698	-0.163907	0.0252235	-0.0234508	0.871902	-0.30729	7.48235e-05	0.140457	0.0830457	-0.143383	0.142156	-0.283839	0.000846695
ENSG00000054148	PHPT1	phosphohistidine phosphatase 1 [Source:HGNC Symbol;Acc:HGNC:30033]	protein_coding	3.65365e-06	-0.459703	0.00065393	0.258875	0.195761	-0.169671	0.288798	0.718578	5.32639e-07	0.290032	0.109261	-0.428546	0.00839119
ENSG00000054179	ENTPD2	ectonucleoside triphosphate diphosphohydrolase 2 [Source:HGNC Symbol;Acc:HGNC:3364]	protein_coding	0.0393756	-0.480887	0.0113706	-0.0364138	0.927164	-0.266554	0.225743	0.444473	0.0334794	0.214333	0.442092	-0.23014	0.35625
ENSG00000054219	LY75	lymphocyte antigen 75 [Source:HGNC Symbol;Acc:HGNC:6729]	protein_coding	0.0356022	-0.322268	0.0695691	-0.331001	0.195963	0.0893843	0.682752	-0.00873244	0.971136	0.411653	0.0667863	0.420385	0.0474324
ENSG00000054267	ARID4B	AT rich interactive domain 4B (RBP1-like) [Source:HGNC Symbol;Acc:HGNC:15550]	protein_coding	8.82991e-09	0.506762	1.38398e-06	-0.084169	0.665735	0.361128	0.00210277	-0.590931	1.99662e-07	-0.145634	0.343865	0.445297	0.000438305
ENSG00000054277	OPN3	opsin 3 [Source:HGNC Symbol;Acc:HGNC:14007]	protein_coding	1.73396e-13	0.967348	2.9118e-11	0.259474	0.26246	0.940021	2.79858e-09	-0.707874	8.71014e-06	-0.0273265	0.920182	0.680548	9.44083e-05
ENSG00000054282	SDCCAG8	serologically defined colon cancer antigen 8 [Source:HGNC Symbol;Acc:HGNC:10671]	protein_coding	0.171668	0.0276321	0.880142	-0.299103	0.187773	-0.145575	0.434088	-0.326735	0.0584865	-0.173207	0.448515	0.153528	0.463309
ENSG00000054392	HHAT	hedgehog acyltransferase [Source:HGNC Symbol;Acc:HGNC:18270]	protein_coding	0.885632	0.182127	0.813298	0.311213	0.802409	0.525097	0.507146	0.129085	0.880386	0.342969	0.753968	0.213884	0.822496
ENSG00000054523	KIF1B	kinesin family member 1B [Source:HGNC Symbol;Acc:HGNC:16636]	protein_coding	8.26171e-13	0.427828	5.79485e-06	-0.193293	0.173247	0.454327	1.0194e-05	-0.621121	9.09693e-10	0.0264988	0.879158	0.64762	4.18729e-09
ENSG00000054598	FOXC1	forkhead box C1 [Source:HGNC Symbol;Acc:HGNC:3800]	protein_coding	5.82392e-44	1.79204	2.99086e-23	-0.872791	0.000349566	0.786941	0.000121034	-2.66483	4.76539e-41	-1.0051	2.86933e-06	1.65973	3.32564e-14
ENSG00000054611	TBC1D22A	TBC1 domain family, member 22A [Source:HGNC Symbol;Acc:HGNC:1309]	protein_coding	0.00823771	0.359568	0.00967465	0.0613833	0.820156	0.384145	0.0117231	-0.298184	0.0529216	0.0245778	0.922885	0.322762	0.0578369
ENSG00000054654	SYNE2	spectrin repeat containing, nuclear envelope 2 [Source:HGNC Symbol;Acc:HGNC:17084]	protein_coding	6.96327e-21	-1.25385	3.24328e-15	0.20672	0.446909	-0.788941	8.25534e-06	1.46057	1.99946e-17	0.464904	0.0267815	-0.995661	1.62757e-07
ENSG00000054690	PLEKHH1	pleckstrin homology domain containing, family H (with MyTH4 domain) member 1 [Source:HGNC Symbol;Acc:HGNC:17733]	protein_coding	0.0817394	-0.175468	0.304597	-0.225535	0.37621	-0.433291	0.0144358	-0.0500668	0.807922	-0.257823	0.249032	-0.207756	0.323668
ENSG00000054793	ATP9A	ATPase, class II, type 9A [Source:HGNC Symbol;Acc:HGNC:13540]	protein_coding	4.72032e-48	1.41891	6.88906e-29	0.418676	0.0189671	1.78129	1.76187e-38	-1.00024	6.49275e-13	0.362374	0.0320328	1.36261	6.3904e-20
ENSG00000054965	FAM168A	family with sequence similarity 168, member A [Source:HGNC Symbol;Acc:HGNC:28999]	protein_coding	3.37e-11	-0.449427	1.2323e-05	0.233347	0.11432	0.204836	0.0826209	0.682774	4.5073e-10	0.654262	2.76606e-08	-0.0285114	0.855449
ENSG00000054967	RELT	RELT tumor necrosis factor receptor [Source:HGNC Symbol;Acc:HGNC:13764]	protein_coding	4.54368e-17	-0.294471	0.0764603	-0.768098	0.000121738	-1.5274	4.39434e-17	-0.473627	0.00890282	-1.23293	4.54579e-10	-0.759303	0.000246739
ENSG00000054983	GALC	galactosylceramidase [Source:HGNC Symbol;Acc:HGNC:4115]	protein_coding	0.41158	-0.0668223	0.712358	-0.270021	0.263996	-0.039482	0.849887	-0.203199	0.270295	0.0273404	0.925278	0.230539	0.261496
ENSG00000055044	NOP58	NOP58 ribonucleoprotein [Source:HGNC Symbol;Acc:HGNC:29926]	protein_coding	1.29619e-70	-1.34826	4.48201e-42	-0.382835	0.00415225	-1.66043	1.17387e-53	0.96543	5.05548e-19	-0.312161	0.0189917	-1.27759	6.35239e-28
ENSG00000055070	SZRD1	SUZ RNA binding domain containing 1 [Source:HGNC Symbol;Acc:HGNC:30232]	protein_coding	0.154004	-0.0538452	0.576236	-0.0144798	0.93753	-0.194924	0.0445235	0.0393654	0.717914	-0.141079	0.241833	-0.180444	0.0940278
ENSG00000055118	KCNH2	potassium channel, voltage gated eag related subfamily H, member 2 [Source:HGNC Symbol;Acc:HGNC:6251]	protein_coding	0.0424082	0.386507	0.0186211	0.0291981	0.932157	0.288268	0.119921	-0.357309	0.0473626	-0.098239	0.7122	0.25907	0.211178
ENSG00000055130	CUL1	cullin 1 [Source:HGNC Symbol;Acc:HGNC:2551]	protein_coding	6.57898e-06	-0.363621	0.000174339	-0.293058	0.0249309	-0.482851	4.08474e-06	0.0705631	0.558235	-0.11923	0.412659	-0.189793	0.126496
ENSG00000055147	FAM114A2	family with sequence similarity 114, member A2 [Source:HGNC Symbol;Acc:HGNC:1333]	protein_coding	0.0784974	0.238272	0.0440466	-0.0365548	0.87695	0.0370203	0.805786	-0.274826	0.0319482	-0.201251	0.209065	0.073575	0.655838
ENSG00000055163	CYFIP2	cytoplasmic FMR1 interacting protein 2 [Source:HGNC Symbol;Acc:HGNC:13760]	protein_coding	2.40444e-07	-0.595831	0.0835864	0.719903	0.120327	1.22115	0.000471435	1.31573	0.000190664	1.81698	1.20092e-06	0.501249	0.224599
ENSG00000055208	TAB2	TGF-beta activated kinase 1/MAP3K7 binding protein 2 [Source:HGNC Symbol;Acc:HGNC:17075]	protein_coding	4.09711e-11	0.52736	1.61524e-07	-0.144172	0.385825	0.3431	0.00242083	-0.671532	6.35145e-10	-0.18426	0.193806	0.487272	5.47244e-05
ENSG00000055211	GINM1	glycoprotein integral membrane 1 [Source:HGNC Symbol;Acc:HGNC:21074]	protein_coding	1.97821e-14	0.469238	1.26579e-10	-0.0385576	0.790712	0.353592	1.15909e-05	-0.507795	1.40019e-10	-0.115645	0.274592	0.39215	7.09904e-06
ENSG00000055332	EIF2AK2	eukaryotic translation initiation factor 2-alpha kinase 2 [Source:HGNC Symbol;Acc:HGNC:9437]	protein_coding	3.26782e-07	-0.396714	0.000204634	-0.46637	0.000580334	-0.573797	6.20695e-07	-0.0696562	0.602583	-0.177083	0.241972	-0.107427	0.465307
ENSG00000055483	USP36	ubiquitin specific peptidase 36 [Source:HGNC Symbol;Acc:HGNC:20062]	protein_coding	6.31423e-12	-0.719057	3.1706e-11	-0.319038	0.0333384	-0.638332	6.97932e-08	0.400018	0.000980151	0.0807247	0.66021	-0.319294	0.0189172
ENSG00000055609	KMT2C	lysine (K)-specific methyltransferase 2C [Source:HGNC Symbol;Acc:HGNC:13726]	protein_coding	1.25664e-07	0.564112	6.17363e-05	-0.0930125	0.727357	0.583197	0.000156632	-0.657124	1.64509e-05	0.0190855	0.943491	0.67621	5.08031e-05
ENSG00000055917	PUM2	pumilio RNA-binding family member 2 [Source:HGNC Symbol;Acc:HGNC:14958]	protein_coding	0.0196087	-0.119524	0.279566	-0.337278	0.0136064	-0.0805778	0.526541	-0.217754	0.0607248	0.0389461	0.829489	0.2567	0.0437256
ENSG00000055950	MRPL43	mitochondrial ribosomal protein L43 [Source:HGNC Symbol;Acc:HGNC:14517]	protein_coding	0.149703	-0.0814717	0.477821	0.134194	0.426751	-0.100416	0.425733	0.215666	0.0647546	-0.0189441	0.921979	-0.23461	0.0689854
ENSG00000056050	C4orf27	chromosome 4 open reading frame 27 [Source:HGNC Symbol;Acc:HGNC:26051]	protein_coding	2.48485e-22	-1.56712	4.49247e-15	0.0263449	0.950705	-1.42207	4.52599e-11	1.59346	1.08318e-13	0.145044	0.683567	-1.44842	4.39798e-10
ENSG00000056097	ZFR	zinc finger RNA binding protein [Source:HGNC Symbol;Acc:HGNC:17277]	protein_coding	0.183121	-0.0213073	0.843542	-0.0981024	0.526841	-0.195105	0.0601766	-0.0767951	0.488394	-0.173797	0.16485	-0.0970023	0.433798
ENSG00000056277	ZNF280C	zinc finger protein 280C [Source:HGNC Symbol;Acc:HGNC:25955]	protein_coding	4.79495e-05	-0.648326	9.87404e-05	-0.183268	0.498028	-0.637044	0.000458177	0.465057	0.0120141	0.0112814	0.972361	-0.453776	0.0266277
ENSG00000056558	TRAF1	TNF receptor-associated factor 1 [Source:HGNC Symbol;Acc:HGNC:12031]	protein_coding	0.00113142	0.447299	0.010934	0.0466209	0.898136	0.595087	0.00145733	-0.400678	0.0378924	0.147789	0.578057	0.548467	0.00770412
ENSG00000056586	RC3H2	ring finger and CCCH-type domains 2 [Source:HGNC Symbol;Acc:HGNC:21461]	protein_coding	0.00648455	0.144356	0.261243	-0.29916	0.0764203	0.0134698	0.933264	-0.443515	0.000661059	-0.130886	0.466601	0.312629	0.0345455
ENSG00000056736	IL17RB	interleukin 17 receptor B [Source:HGNC Symbol;Acc:HGNC:18015]	protein_coding	0.00138275	-0.931537	0.00845259	0.480986	0.377035	-0.00733823	0.987214	1.41252	0.000154402	0.924198	0.0398616	-0.488324	0.272899
ENSG00000056972	TRAF3IP2	TRAF3 interacting protein 2 [Source:HGNC Symbol;Acc:HGNC:1343]	protein_coding	4.41022e-12	0.419345	1.15079e-06	0.266131	0.0239274	0.650941	1.27996e-12	-0.153214	0.123955	0.231596	0.0382879	0.384809	0.000161628
ENSG00000057019	DCBLD2	discoidin, CUB and LCCL domain containing 2 [Source:HGNC Symbol;Acc:HGNC:24627]	protein_coding	4.79482e-18	0.578056	0.00474243	-1.18825	9.50641e-07	-0.819351	0.000207121	-1.7663	9.51988e-17	-1.39741	8.6307e-10	0.368896	0.156192
ENSG00000057252	SOAT1	sterol O-acyltransferase 1 [Source:HGNC Symbol;Acc:HGNC:11177]	protein_coding	0.0223935	0.262394	0.464429	0.880304	0.0424179	0.784569	0.0282306	0.617911	0.0849666	0.522176	0.24331	-0.0957352	0.839111
ENSG00000057294	PKP2	plakophilin 2 [Source:HGNC Symbol;Acc:HGNC:9024]	protein_coding	4.42315e-20	-0.845103	2.1405e-12	-0.424844	0.00915171	-1.13214	3.60798e-18	0.420258	0.00191351	-0.287042	0.0822197	-0.7073	9.58632e-07
ENSG00000057593	F7	coagulation factor VII (serum prothrombin conversion accelerator) [Source:HGNC Symbol;Acc:HGNC:3544]	protein_coding	2.90596e-10	1.01555	0.00523755	1.12522	0.0180443	2.41813	5.57126e-11	0.109669	0.80798	1.40258	0.00061582	1.29291	0.00136375
ENSG00000057608	GDI2	GDP dissociation inhibitor 2 [Source:HGNC Symbol;Acc:HGNC:4227]	protein_coding	1.57714e-05	-0.326686	0.000223166	-0.183987	0.157934	-0.423732	9.85141e-06	0.142699	0.1641	-0.0970465	0.468594	-0.239745	0.0285007
ENSG00000057657	PRDM1	PR domain containing 1, with ZNF domain [Source:HGNC Symbol;Acc:HGNC:9346]	protein_coding	0.308941	-0.542845	0.174518	-0.627793	0.281455	-0.525131	0.237086	-0.0849484	0.86609	0.0177142	0.979117	0.102663	0.858839
ENSG00000057663	ATG5	autophagy related 5 [Source:HGNC Symbol;Acc:HGNC:589]	protein_coding	5.28815e-09	0.328934	2.5989e-05	-0.152506	0.199504	0.22423	0.010742	-0.48144	1.01828e-08	-0.104705	0.359799	0.376736	5.08339e-05
ENSG00000057704	TMCC3	transmembrane and coiled-coil domain family 3 [Source:HGNC Symbol;Acc:HGNC:29199]	protein_coding	2.64185e-43	2.77074	5.29558e-32	-0.244047	0.57682	1.8149	2.64014e-12	-3.01478	5.91006e-32	-0.955841	0.00106412	2.05894	2.55345e-13
ENSG00000057757	PITHD1	PITH (C-terminal proteasome-interacting domain of thioredoxin-like) domain containing 1 [Source:HGNC Symbol;Acc:HGNC:25022]	protein_coding	0.0475556	0.256653	0.0343306	0.0082535	0.976671	0.237995	0.07741	-0.2484	0.0619885	-0.0186575	0.932615	0.229742	0.124253
ENSG00000057935	MTA3	metastasis associated 1 family, member 3 [Source:HGNC Symbol;Acc:HGNC:23784]	protein_coding	0.509831	0.0676741	0.450726	0.128368	0.313316	0.0512497	0.617011	0.0606943	0.54307	-0.0164245	0.913246	-0.0771188	0.488605
ENSG00000058056	USP13	ubiquitin specific peptidase 13 (isopeptidase T-3) [Source:HGNC Symbol;Acc:HGNC:12611]	protein_coding	2.54926e-22	-0.946666	7.13484e-17	-0.128257	0.507825	-0.869799	1.80077e-12	0.81841	3.37737e-11	0.0768672	0.697063	-0.741542	3.69263e-08
ENSG00000058063	ATP11B	ATPase, class VI, type 11B [Source:HGNC Symbol;Acc:HGNC:13553]	protein_coding	0.0224977	-0.163078	0.276266	-0.449445	0.015879	-0.249775	0.121007	-0.286368	0.0693607	-0.0866971	0.708164	0.199671	0.275721
ENSG00000058085	LAMC2	laminin, gamma 2 [Source:HGNC Symbol;Acc:HGNC:6493]	protein_coding	1.64428e-10	1.91008	8.55639e-08	-0.435016	0.47595	1.09702	0.00665559	-2.3451	1.1442e-09	-0.813062	0.0932208	1.53204	0.00038863
ENSG00000058091	CDK14	cyclin-dependent kinase 14 [Source:HGNC Symbol;Acc:HGNC:8883]	protein_coding	2.36516e-11	2.07571	2.61392e-08	0.671517	0.274808	2.30587	4.17795e-09	-1.4042	0.000286511	0.230159	0.666255	1.63436	6.95256e-05
ENSG00000058262	SEC61A1	Sec61 alpha 1 subunit (S. cerevisiae) [Source:HGNC Symbol;Acc:HGNC:18276]	protein_coding	6.70661e-23	0.655564	3.44474e-21	0.103009	0.37485	0.366943	2.07481e-06	-0.552555	2.78275e-13	-0.288621	0.000877068	0.263935	0.00219971
ENSG00000058272	PPP1R12A	protein phosphatase 1, regulatory subunit 12A [Source:HGNC Symbol;Acc:HGNC:7618]	protein_coding	0.0214557	0.249931	0.0935521	-0.216057	0.342071	0.0263907	0.890542	-0.465988	0.00286447	-0.22354	0.269038	0.242448	0.1882
ENSG00000058335	RASGRF1	Ras protein-specific guanine nucleotide-releasing factor 1 [Source:HGNC Symbol;Acc:HGNC:9875]	protein_coding	0.276329	0.0760461	0.879404	-0.772563	0.237432	-0.123349	0.822568	-0.848609	0.0842325	-0.199395	0.783142	0.649215	0.24975
ENSG00000058453	CROCC	ciliary rootlet coiled-coil, rootletin [Source:HGNC Symbol;Acc:HGNC:21299]	protein_coding	0.0021169	-0.222904	0.151967	0.348061	0.087785	0.127029	0.476559	0.570965	0.000297505	0.349932	0.0711836	-0.221032	0.23915
ENSG00000058600	POLR3E	polymerase (RNA) III (DNA directed) polypeptide E (80kD) [Source:HGNC Symbol;Acc:HGNC:30347]	protein_coding	0.0163573	-0.178729	0.0968687	-0.222029	0.136386	-0.335801	0.00316827	-0.0433002	0.743918	-0.157073	0.287566	-0.113773	0.416285
ENSG00000058668	ATP2B4	ATPase, Ca++ transporting, plasma membrane 4 [Source:HGNC Symbol;Acc:HGNC:817]	protein_coding	3.24187e-06	1.28217	0.000106514	-0.00897132	0.991526	1.35212	0.000191215	-1.29114	0.000348684	0.0699451	0.909664	1.36109	0.000584955
ENSG00000058673	ZC3H11A	zinc finger CCCH-type containing 11A [Source:HGNC Symbol;Acc:HGNC:29093]	protein_coding	0.000445175	0.199047	0.0100324	-0.12565	0.290405	0.0987825	0.274332	-0.324697	7.70423e-05	-0.100264	0.364761	0.224432	0.0158836
ENSG00000058729	RIOK2	RIO kinase 2 [Source:HGNC Symbol;Acc:HGNC:18999]	protein_coding	2.89078e-09	-0.573833	6.54451e-09	-0.242543	0.0815596	-0.509859	2.30165e-06	0.33129	0.00282278	0.0639743	0.709112	-0.267316	0.0311183
ENSG00000058799	YIPF1	Yip1 domain family, member 1 [Source:HGNC Symbol;Acc:HGNC:25231]	protein_coding	0.000213132	0.46654	9.74778e-05	0.352625	0.0312092	0.459147	0.00047021	-0.113915	0.431353	-0.00739344	0.972779	0.106522	0.520934
ENSG00000058804	NDC1	NDC1 transmembrane nucleoporin [Source:HGNC Symbol;Acc:HGNC:25525]	protein_coding	9.09177e-76	-2.39499	4.14442e-58	-0.391741	0.0653643	-2.17451	1.74001e-41	2.00325	2.7571e-35	0.220487	0.337428	-1.78276	1.66255e-24
ENSG00000058866	DGKG	diacylglycerol kinase, gamma 90kDa [Source:HGNC Symbol;Acc:HGNC:2853]	protein_coding	0.00902032	-0.2757	0.708832	0.139487	0.914496	-2.62354	0.0037076	0.415187	0.59668	-2.34784	0.0267525	-2.76303	0.00376305
ENSG00000059122	FLYWCH1	FLYWCH-type zinc finger 1 [Source:HGNC Symbol;Acc:HGNC:25404]	protein_coding	0.153156	0.112842	0.258841	0.161765	0.251964	0.210643	0.0443903	0.0489233	0.676167	0.0978011	0.486496	0.0488778	0.715753
ENSG00000059145	UNKL	unkempt family zinc finger-like [Source:HGNC Symbol;Acc:HGNC:14184]	protein_coding	2.21176e-14	0.616949	9.85296e-06	0.439804	0.019795	1.15021	3.12692e-15	-0.177145	0.279764	0.533265	0.0013697	0.71041	9.10344e-06
ENSG00000059377	TBXAS1	thromboxane A synthase 1 (platelet) [Source:HGNC Symbol;Acc:HGNC:11609]	protein_coding	9.88933e-12	-0.106284	0.457171	-0.205211	0.313371	-0.982592	1.66453e-12	-0.0989269	0.534763	-0.876308	4.37355e-09	-0.777381	3.56735e-07
ENSG00000059378	PARP12	poly (ADP-ribose) polymerase family, member 12 [Source:HGNC Symbol;Acc:HGNC:21919]	protein_coding	4.86447e-23	0.968838	1.62933e-15	-0.201407	0.311775	0.57217	2.56267e-05	-1.17025	6.05369e-19	-0.396668	0.0113356	0.773578	1.12281e-07
ENSG00000059573	ALDH18A1	aldehyde dehydrogenase 18 family, member A1 [Source:HGNC Symbol;Acc:HGNC:9722]	protein_coding	3.37729e-08	-0.837409	1.02716e-07	0.0712647	0.82142	-0.199286	0.296261	0.908673	9.86457e-08	0.638122	0.00100306	-0.270551	0.190031
ENSG00000059588	TARBP1	TAR (HIV-1) RNA binding protein 1 [Source:HGNC Symbol;Acc:HGNC:11568]	protein_coding	1.62877e-37	-1.49732	3.62275e-32	-0.00905467	0.976596	-0.831848	1.69976e-09	1.48827	1.53162e-27	0.665476	1.96346e-05	-0.822794	3.99389e-08
ENSG00000059691	GATB	glutamyl-tRNA(Gln) amidotransferase, subunit B [Source:HGNC Symbol;Acc:HGNC:8849]	protein_coding	1.89593e-10	-0.721517	4.35112e-07	0.0957048	0.717274	-0.643279	3.95904e-05	0.817222	1.04389e-07	0.0782383	0.754344	-0.738984	1.13286e-05
ENSG00000059728	MXD1	MAX dimerization protein 1 [Source:HGNC Symbol;Acc:HGNC:6761]	protein_coding	8.99901e-19	1.50644	1.90697e-13	-0.273074	0.434635	0.695165	0.00286481	-1.77951	9.87391e-16	-0.811273	0.00151982	0.968239	0.000102258
ENSG00000059758	CDK17	cyclin-dependent kinase 17 [Source:HGNC Symbol;Acc:HGNC:8750]	protein_coding	0.00714971	0.171453	0.301343	-0.387281	0.0741512	0.0613328	0.757645	-0.558734	0.000880155	-0.11012	0.660567	0.448614	0.0174672
ENSG00000059769	DNAJC25	DnaJ (Hsp40) homolog, subfamily C , member 25 [Source:HGNC Symbol;Acc:HGNC:34187]	protein_coding	2.40604e-05	0.574493	3.22262e-05	0.2104	0.342811	0.567463	0.000164993	-0.364092	0.0176305	-0.00702934	0.977171	0.357063	0.0353295
ENSG00000059804	SLC2A3	solute carrier family 2 (facilitated glucose transporter), member 3 [Source:HGNC Symbol;Acc:HGNC:11007]	protein_coding	0.250704	-2.55895	0.0972704	-2.45417	0.285546	-0.654561	0.730319	0.104784	0.959486	1.90439	0.376484	1.7996	0.362251
ENSG00000059915	PSD	pleckstrin and Sec7 domain containing [Source:HGNC Symbol;Acc:HGNC:9507]	protein_coding	0.000751862	0.178997	0.533511	0.79206	0.0129854	0.834462	0.00171273	0.613063	0.0233691	0.655465	0.0381194	0.0424022	0.905811
ENSG00000060069	CTDP1	CTD (carboxy-terminal domain, RNA polymerase II, polypeptide A) phosphatase, subunit 1 [Source:HGNC Symbol;Acc:HGNC:2498]	protein_coding	6.12725e-08	0.574482	2.18096e-07	0.0166207	0.947363	0.339328	0.00689128	-0.557861	3.80806e-06	-0.235154	0.120461	0.322707	0.0196903
ENSG00000060138	YBX3	Y box binding protein 3 [Source:HGNC Symbol;Acc:HGNC:2428]	protein_coding	3.30168e-22	-0.844502	1.08739e-18	-0.255178	0.0619465	-0.763654	2.40202e-13	0.589324	2.07083e-08	0.080848	0.611352	-0.508476	1.08803e-05
ENSG00000060140	STYK1	serine/threonine/tyrosine kinase 1 [Source:HGNC Symbol;Acc:HGNC:18889]	protein_coding	1.32926e-52	1.777	4.22822e-42	0.178122	0.435892	1.32271	2.36787e-20	-1.59888	1.46693e-29	-0.454289	0.00636275	1.14459	1.77104e-13
ENSG00000060237	WNK1	WNK lysine deficient protein kinase 1 [Source:HGNC Symbol;Acc:HGNC:14540]	protein_coding	0.0176892	-0.352755	0.00727165	-0.236636	0.229315	-0.353611	0.0147615	0.116119	0.460701	-0.000855775	0.997944	-0.116975	0.514959
ENSG00000060339	CCAR1	cell division cycle and apoptosis regulator 1 [Source:HGNC Symbol;Acc:HGNC:24236]	protein_coding	2.46145e-10	-0.615342	1.2657e-07	-0.259758	0.13019	-0.744157	3.92503e-09	0.355584	0.00654104	-0.128815	0.472563	-0.484399	0.000605477
ENSG00000060491	OGFR	opioid growth factor receptor [Source:HGNC Symbol;Acc:HGNC:15768]	protein_coding	0.698192	0.0464616	0.658284	-0.055039	0.751096	0.0497758	0.671141	-0.101501	0.353815	0.00331417	0.985161	0.104815	0.397175
ENSG00000060558	GNA15	guanine nucleotide binding protein (G protein), alpha 15 (Gq class) [Source:HGNC Symbol;Acc:HGNC:4383]	protein_coding	2.80857e-29	0.999505	2.29033e-18	-0.291503	0.0893704	0.281045	0.037685	-1.29101	3.3804e-25	-0.71846	9.66347e-08	0.572548	5.2496e-05
ENSG00000060566	CREB3L3	cAMP responsive element binding protein 3-like 3 [Source:HGNC Symbol;Acc:HGNC:18855]	protein_coding	1.47504e-71	2.45214	9.37207e-50	1.12371	4.57233e-08	2.92922	5.90786e-62	-1.32843	2.81604e-14	0.477084	0.0199578	1.80551	2.36403e-22
ENSG00000060642	PIGV	phosphatidylinositol glycan anchor biosynthesis, class V [Source:HGNC Symbol;Acc:HGNC:26031]	protein_coding	0.373999	0.0368232	0.820001	0.216338	0.306507	0.166457	0.304833	0.179515	0.260604	0.129634	0.541291	-0.0498811	0.80571
ENSG00000060656	PTPRU	protein tyrosine phosphatase, receptor type, U [Source:HGNC Symbol;Acc:HGNC:9683]	protein_coding	0.0248974	0.239906	0.0828209	0.194951	0.358814	0.422127	0.00395649	-0.044955	0.793973	0.182221	0.341033	0.227176	0.183161
ENSG00000060688	SNRNP40	small nuclear ribonucleoprotein 40kDa (U5) [Source:HGNC Symbol;Acc:HGNC:30857]	protein_coding	2.51145e-20	-0.922743	2.61924e-13	-0.1727	0.404443	-1.05489	1.53424e-14	0.750044	5.37395e-08	-0.132144	0.515445	-0.882188	3.92475e-09
ENSG00000060749	QSER1	glutamine and serine rich 1 [Source:HGNC Symbol;Acc:HGNC:26154]	protein_coding	4.25361e-06	-0.650815	7.88661e-07	-0.387789	0.0327162	-0.486232	0.00088565	0.263026	0.0844721	0.164583	0.407338	-0.0984426	0.603481
ENSG00000060762	MPC1	mitochondrial pyruvate carrier 1 [Source:HGNC Symbol;Acc:HGNC:21606]	protein_coding	0.000201958	0.86325	6.58085e-05	0.158017	0.69709	0.559174	0.0225646	-0.705233	0.00302374	-0.304076	0.329092	0.401157	0.149797
ENSG00000060971	ACAA1	acetyl-CoA acyltransferase 1 [Source:HGNC Symbol;Acc:HGNC:82]	protein_coding	0.329026	0.0407925	0.769084	0.19651	0.290441	0.165711	0.239086	0.155718	0.265963	0.124918	0.488312	-0.0307997	0.865338
ENSG00000060982	BCAT1	branched chain amino-acid transaminase 1, cytosolic [Source:HGNC Symbol;Acc:HGNC:976]	protein_coding	0.191625	0.621049	0.137417	-0.160384	0.841215	-0.0457633	0.932549	-0.781433	0.0837963	-0.666813	0.233522	0.11462	0.850996
ENSG00000061273	HDAC7	histone deacetylase 7 [Source:HGNC Symbol;Acc:HGNC:14067]	protein_coding	0.165614	0.163997	0.0671839	0.0103174	0.959243	0.00866198	0.940863	-0.15368	0.118898	-0.155335	0.193174	-0.00165545	0.990341
ENSG00000061656	SPAG4	sperm associated antigen 4 [Source:HGNC Symbol;Acc:HGNC:11214]	protein_coding	0.290141	0.0250423	0.929116	-0.0875702	0.852284	0.371604	0.172027	-0.112612	0.705516	0.346562	0.297854	0.459174	0.120635
ENSG00000061676	NCKAP1	NCK-associated protein 1 [Source:HGNC Symbol;Acc:HGNC:7666]	protein_coding	0.0112916	-0.0138339	0.929217	-0.413206	0.0177762	-0.176857	0.249081	-0.399372	0.00511283	-0.163023	0.39116	0.236349	0.1556
ENSG00000061794	MRPS35	mitochondrial ribosomal protein S35 [Source:HGNC Symbol;Acc:HGNC:16635]	protein_coding	8.56693e-17	-0.638931	1.9307e-10	-0.227472	0.125316	-0.836929	1.3635e-14	0.41146	0.000223896	-0.197998	0.163291	-0.609457	3.55756e-07
ENSG00000061918	GUCY1B3	guanylate cyclase 1, soluble, beta 3 [Source:HGNC Symbol;Acc:HGNC:4687]	protein_coding	0.127153	-0.480322	0.19844	-0.00609296	0.99475	-0.760121	0.0611121	0.474229	0.244569	-0.279799	0.638341	-0.754028	0.0896396
ENSG00000061936	SFSWAP	splicing factor, suppressor of white-apricot family [Source:HGNC Symbol;Acc:HGNC:10790]	protein_coding	0.090056	0.213714	0.0173732	0.0796406	0.609274	0.139164	0.17607	-0.134073	0.187703	-0.0745497	0.59115	0.0595235	0.63542
ENSG00000061938	TNK2	tyrosine kinase, non-receptor, 2 [Source:HGNC Symbol;Acc:HGNC:19297]	protein_coding	6.79788e-22	0.698688	6.3391e-18	0.0294295	0.862364	0.468581	1.72533e-07	-0.669259	2.89456e-14	-0.230107	0.0319914	0.439152	7.27155e-06
ENSG00000061987	MON2	MON2 homolog (S. cerevisiae) [Source:HGNC Symbol;Acc:HGNC:29177]	protein_coding	5.24936e-07	0.391508	0.00077434	0.000529019	0.998586	0.561286	7.25977e-06	-0.390979	0.00211118	0.169779	0.306727	0.560757	3.94121e-05
ENSG00000062038	CDH3	cadherin 3, type 1, P-cadherin (placental) [Source:HGNC Symbol;Acc:HGNC:1762]	protein_coding	4.64707e-05	0.0199308	0.925483	-0.341117	0.200395	-0.792659	3.85253e-05	-0.361048	0.0724539	-0.81259	0.000114368	-0.451543	0.0403692
ENSG00000062194	GPBP1	GC-rich promoter binding protein 1 [Source:HGNC Symbol;Acc:HGNC:29520]	protein_coding	0.174855	0.0444352	0.596516	-0.111974	0.341894	0.0499664	0.591364	-0.156409	0.0622216	0.00553123	0.968395	0.16194	0.0817935
ENSG00000062282	DGAT2	diacylglycerol O-acyltransferase 2 [Source:HGNC Symbol;Acc:HGNC:16940]	protein_coding	1.36687e-25	-1.48372	5.05797e-20	0.298836	0.235524	-0.485319	0.00864341	1.78256	1.52755e-24	0.998401	1.99052e-07	-0.784155	5.80301e-05
ENSG00000062370	ZNF112	zinc finger protein 112 [Source:HGNC Symbol;Acc:HGNC:12892]	protein_coding	0.410797	-0.134562	0.435938	0.0435616	0.891623	0.139641	0.457562	0.178124	0.336159	0.274203	0.207863	0.0960794	0.663134
ENSG00000062485	CS	citrate synthase [Source:HGNC Symbol;Acc:HGNC:2422]	protein_coding	1.99944e-26	-0.816519	2.11565e-18	-0.194936	0.169564	-0.881905	3.38113e-18	0.621583	1.18622e-09	-0.065386	0.682506	-0.686969	6.02765e-10
ENSG00000062524	LTK	leukocyte receptor tyrosine kinase [Source:HGNC Symbol;Acc:HGNC:6721]	protein_coding	0.751679	-0.148164	0.776599	0.338487	0.670817	0.150061	0.79503	0.486651	0.356682	0.298224	0.686151	-0.188427	0.772515
ENSG00000062582	MRPS24	mitochondrial ribosomal protein S24 [Source:HGNC Symbol;Acc:HGNC:14510]	protein_coding	5.98621e-09	-0.730617	2.0827e-06	0.0920123	0.753393	-0.632216	0.000196325	0.82263	7.60221e-07	0.0984016	0.706813	-0.724228	7.77991e-05
ENSG00000062598	ELMO2	engulfment and cell motility 2 [Source:HGNC Symbol;Acc:HGNC:17233]	protein_coding	5.06046e-05	0.164808	0.118266	0.280008	0.0399572	0.478335	7.81957e-06	0.115201	0.330425	0.313527	0.0120309	0.198326	0.112854
ENSG00000062650	WAPAL	wings apart-like homolog (Drosophila) [Source:HGNC Symbol;Acc:HGNC:23293]	protein_coding	0.0450712	-0.0816646	0.464838	-0.291859	0.0346245	-0.167239	0.155813	-0.210195	0.0668492	-0.085574	0.592985	0.124621	0.358096
ENSG00000062716	VMP1	vacuole membrane protein 1 [Source:HGNC Symbol;Acc:HGNC:29559]	protein_coding	2.30086e-08	0.34005	0.00426813	-0.413727	0.00785317	-0.101537	0.484735	-0.753777	1.60381e-09	-0.441587	0.00211452	0.31219	0.0319912
ENSG00000062725	APPBP2	amyloid beta precursor protein (cytoplasmic tail) binding protein 2 [Source:HGNC Symbol;Acc:HGNC:622]	protein_coding	0.00586304	0.277562	0.0741979	-0.0226473	0.945394	0.457877	0.0054603	-0.30021	0.0760766	0.180315	0.411655	0.480524	0.0076569
ENSG00000062822	POLD1	polymerase (DNA directed), delta 1, catalytic subunit [Source:HGNC Symbol;Acc:HGNC:9175]	protein_coding	2.15424e-59	-1.7101	1.88872e-39	0.0341024	0.900041	-1.49618	1.66238e-26	1.74421	1.18169e-35	0.213924	0.281478	-1.53028	2.96671e-24
ENSG00000063046	EIF4B	eukaryotic translation initiation factor 4B [Source:HGNC Symbol;Acc:HGNC:3285]	protein_coding	0.0416168	-0.275041	0.00778413	-0.0927611	0.608224	-0.184804	0.117037	0.18228	0.118112	0.0902367	0.57211	-0.0920431	0.514388
ENSG00000063169	GLTSCR1	glioma tumor suppressor candidate region gene 1 [Source:HGNC Symbol;Acc:HGNC:4332]	protein_coding	2.93713e-05	0.611164	1.64898e-06	0.356765	0.0444051	0.366976	0.0111834	-0.254399	0.0790176	-0.244188	0.166027	0.0102112	0.958645
ENSG00000063176	SPHK2	sphingosine kinase 2 [Source:HGNC Symbol;Acc:HGNC:18859]	protein_coding	1.54889e-05	0.516007	8.75438e-06	0.508225	0.000600968	0.367993	0.00469069	-0.00778228	0.962287	-0.148014	0.388978	-0.140232	0.371283
ENSG00000063177	RPL18	ribosomal protein L18 [Source:HGNC Symbol;Acc:HGNC:10310]	protein_coding	0.527644	0.0603544	0.668792	0.18867	0.335494	0.0476039	0.76575	0.128316	0.384929	-0.0127505	0.956614	-0.141066	0.396556
ENSG00000063180	CA11	carbonic anhydrase XI [Source:HGNC Symbol;Acc:HGNC:1370]	protein_coding	2.67555e-12	0.98706	2.97932e-08	0.594152	0.0142351	1.34255	1.77728e-12	-0.392908	0.0522344	0.355494	0.142027	0.748403	0.00040709
ENSG00000063241	ISOC2	isochorismatase domain containing 2 [Source:HGNC Symbol;Acc:HGNC:26278]	protein_coding	2.3974e-14	-1.01267	3.67593e-10	0.206335	0.438034	-0.644429	0.000309453	1.219	2.05946e-12	0.368238	0.0994082	-0.850764	8.01695e-06
ENSG00000063244	U2AF2	U2 small nuclear RNA auxiliary factor 2 [Source:HGNC Symbol;Acc:HGNC:23156]	protein_coding	9.14745e-09	-0.196104	0.00196507	-0.0462566	0.6895	-0.390783	6.01444e-09	0.149847	0.0335647	-0.19468	0.0148629	-0.344527	2.77166e-06
ENSG00000063245	EPN1	epsin 1 [Source:HGNC Symbol;Acc:HGNC:21604]	protein_coding	1.84196e-08	0.602268	6.31166e-09	0.326077	0.0228658	0.528228	3.6479e-06	-0.27619	0.0189164	-0.07404	0.669243	0.20215	0.134228
ENSG00000063322	MED29	mediator complex subunit 29 [Source:HGNC Symbol;Acc:HGNC:23074]	protein_coding	0.272337	0.173179	0.0683252	0.120231	0.42053	0.0824216	0.461412	-0.0529486	0.644623	-0.0907578	0.517224	-0.0378093	0.781089
ENSG00000063438	AHRR	aryl-hydrocarbon receptor repressor [Source:HGNC Symbol;Acc:HGNC:346]	protein_coding	5.89519e-08	1.08684	9.83422e-05	0.524215	0.217836	1.60542	3.1325e-08	-0.562629	0.0675834	0.518573	0.145884	1.0812	0.000600855
ENSG00000063587	ZNF275	zinc finger protein 275 [Source:HGNC Symbol;Acc:HGNC:13069]	protein_coding	4.64873e-15	-0.760655	1.76445e-11	-0.417044	0.00439164	-0.855226	3.65623e-12	0.343611	0.00773952	-0.0945712	0.625004	-0.438182	0.00174537
ENSG00000063601	MTMR1	myotubularin related protein 1 [Source:HGNC Symbol;Acc:HGNC:7449]	protein_coding	0.00369775	0.049733	0.643708	-0.282381	0.0274102	-0.1555	0.158038	-0.332114	0.0012857	-0.205233	0.105301	0.126881	0.312013
ENSG00000063660	GPC1	glypican 1 [Source:HGNC Symbol;Acc:HGNC:4449]	protein_coding	0.083609	-0.576696	0.0179321	-0.123978	0.787653	-0.32909	0.24304	0.452718	0.0955104	0.247606	0.493894	-0.205112	0.537284
ENSG00000063761	ADCK1	aarF domain containing kinase 1 [Source:HGNC Symbol;Acc:HGNC:19038]	protein_coding	0.000474542	-0.2065	0.296099	0.456296	0.0676113	-0.293714	0.169433	0.662796	0.00074187	-0.0872141	0.783778	-0.75001	0.000476068
ENSG00000063854	HAGH	hydroxyacylglutathione hydrolase [Source:HGNC Symbol;Acc:HGNC:4805]	protein_coding	2.55835e-13	0.817959	1.63278e-09	0.0304662	0.917993	0.793307	7.91551e-08	-0.787493	9.63526e-08	-0.0246529	0.922903	0.76284	2.18841e-06
ENSG00000063978	RNF4	ring finger protein 4 [Source:HGNC Symbol;Acc:HGNC:10067]	protein_coding	0.0051554	-0.199645	0.0131168	-0.145333	0.218526	-0.27923	0.00128137	0.0543114	0.579683	-0.0795853	0.515001	-0.133897	0.189127
ENSG00000064012	CASP8	caspase 8, apoptosis-related cysteine peptidase [Source:HGNC Symbol;Acc:HGNC:1509]	protein_coding	2.00225e-15	0.38517	6.48044e-05	-0.440488	0.000321771	-0.162084	0.153418	-0.825657	6.62006e-16	-0.547254	1.03479e-06	0.278404	0.0200411
ENSG00000064042	LIMCH1	LIM and calponin homology domains 1 [Source:HGNC Symbol;Acc:HGNC:29191]	protein_coding	4.55293e-14	1.8413	1.46763e-09	-0.221275	0.711249	1.68335	4.32584e-07	-2.06257	5.57669e-10	-0.157943	0.759943	1.90463	1.53305e-07
ENSG00000064102	ASUN	asunder spermatogenesis regulator [Source:HGNC Symbol;Acc:HGNC:20174]	protein_coding	2.67812e-10	-0.413096	3.44376e-05	-0.391947	0.00253217	-0.703913	4.49255e-11	0.0211496	0.874292	-0.290817	0.0241517	-0.311966	0.0111634
ENSG00000064115	TM7SF3	transmembrane 7 superfamily member 3 [Source:HGNC Symbol;Acc:HGNC:23049]	protein_coding	3.99195e-26	-0.71406	1.14938e-18	-0.0537071	0.731596	-0.659966	8.05163e-14	0.660353	6.3505e-14	0.0540942	0.697174	-0.606258	2.86649e-10
ENSG00000064199	SPA17	sperm autoantigenic protein 17 [Source:HGNC Symbol;Acc:HGNC:11210]	protein_coding	5.07943e-08	-0.543433	0.000499164	0.153056	0.557453	-0.694981	4.22039e-05	0.696489	2.91377e-05	-0.151548	0.540947	-0.848036	2.85026e-06
ENSG00000064201	TSPAN32	tetraspanin 32 [Source:HGNC Symbol;Acc:HGNC:13410]	protein_coding	0.0321744	-0.411249	0.467666	0.981296	0.165654	-0.205508	0.752401	1.39255	0.0110574	0.205741	0.820956	-1.1868	0.0514125
ENSG00000064225	ST3GAL6	ST3 beta-galactoside alpha-2,3-sialyltransferase 6 [Source:HGNC Symbol;Acc:HGNC:18080]	protein_coding	1.44298e-11	-0.721821	0.000562263	0.514958	0.0545883	-0.860924	0.000168089	1.23678	1.02098e-08	-0.139103	0.703427	-1.37588	5.99374e-09
ENSG00000064270	ATP2C2	ATPase, Ca++ transporting, type 2C, member 2 [Source:HGNC Symbol;Acc:HGNC:29103]	protein_coding	1.21882e-06	0.574972	4.49898e-05	-0.0931226	0.727423	-0.0350357	0.853603	-0.668095	1.20281e-05	-0.610008	0.000332019	0.0580868	0.785426
ENSG00000064309	CDON	cell adhesion associated, oncogene regulated [Source:HGNC Symbol;Acc:HGNC:17104]	protein_coding	0.0180955	-0.244081	0.365869	0.468424	0.184935	0.371687	0.185774	0.712505	0.00774309	0.615768	0.054222	-0.0967373	0.784097
ENSG00000064313	TAF2	TAF2 RNA polymerase II, TATA box binding protein (TBP)-associated factor, 150kDa [Source:HGNC Symbol;Acc:HGNC:11536]	protein_coding	0.0875554	-0.0722923	0.50733	-0.237417	0.0864645	-0.187154	0.0971587	-0.165124	0.143561	-0.114862	0.433287	0.0502626	0.727107
ENSG00000064393	HIPK2	homeodomain interacting protein kinase 2 [Source:HGNC Symbol;Acc:HGNC:14402]	protein_coding	1.08489e-06	0.288403	0.0263539	-0.45418	0.00662028	-0.0444743	0.788654	-0.742583	3.74725e-08	-0.332877	0.0423729	0.409706	0.00790576
ENSG00000064419	TNPO3	transportin 3 [Source:HGNC Symbol;Acc:HGNC:17103]	protein_coding	0.00660392	-0.0313372	0.67813	-0.121546	0.218097	-0.224803	0.00196619	-0.0902088	0.241928	-0.193466	0.0221847	-0.103257	0.229263
ENSG00000064489	MEF2BNB-MEF2B	MEF2BNB-MEF2B readthrough [Source:HGNC Symbol;Acc:HGNC:39979]	protein_coding	0.323917	0.525263	0.118691	0.455969	0.37404	0.499289	0.181895	-0.0692937	0.868898	-0.0259737	0.9653	0.04332	0.929001
ENSG00000064490	RFXANK	regulatory factor X-associated ankyrin-containing protein [Source:HGNC Symbol;Acc:HGNC:9987]	protein_coding	0.000355067	-0.23667	0.0872463	0.246917	0.209735	-0.30408	0.042728	0.483588	0.000736772	-0.0674097	0.767	-0.550997	0.000424361
ENSG00000064545	TMEM161A	transmembrane protein 161A [Source:HGNC Symbol;Acc:HGNC:26020]	protein_coding	6.66986e-25	-1.14316	1.74886e-17	0.12389	0.596501	-0.821411	1.77006e-08	1.26705	1.48559e-18	0.321753	0.0872082	-0.945301	1.54982e-09
ENSG00000064547	LPAR2	lysophosphatidic acid receptor 2 [Source:HGNC Symbol;Acc:HGNC:3168]	protein_coding	0.0273932	0.366883	0.0166222	0.165875	0.514775	-0.048241	0.807215	-0.201008	0.252232	-0.415124	0.031625	-0.214116	0.278954
ENSG00000064601	CTSA	cathepsin A [Source:HGNC Symbol;Acc:HGNC:9251]	protein_coding	1.52397e-11	-0.550115	4.93298e-07	0.272149	0.0835972	-0.0891759	0.517367	0.822265	2.25213e-12	0.460939	0.000560949	-0.361325	0.00730181
ENSG00000064607	SUGP2	SURP and G patch domain containing 2 [Source:HGNC Symbol;Acc:HGNC:18641]	protein_coding	4.66347e-10	-0.565724	1.83869e-09	-0.123386	0.43241	-0.45079	1.37665e-05	0.442337	1.91965e-05	0.114934	0.424848	-0.327404	0.00468389
ENSG00000064651	SLC12A2	solute carrier family 12 (sodium/potassium/chloride transporter), member 2 [Source:HGNC Symbol;Acc:HGNC:10911]	protein_coding	6.73019e-16	-1.44877	1.05507e-17	-0.394304	0.118211	-0.681833	0.000350856	1.05446	1.33315e-08	0.766933	0.000231269	-0.287529	0.204331
ENSG00000064652	SNX24	sorting nexin 24 [Source:HGNC Symbol;Acc:HGNC:21533]	protein_coding	0.0396136	-0.508359	0.0445362	0.194894	0.635235	-0.0480731	0.878779	0.703253	0.00796779	0.460286	0.174162	-0.242967	0.441882
ENSG00000064666	CNN2	calponin 2 [Source:HGNC Symbol;Acc:HGNC:2156]	protein_coding	7.85325e-16	0.319703	0.000269604	-0.286192	0.0152278	-0.377076	8.38276e-05	-0.605895	7.6364e-11	-0.696779	1.2003e-12	-0.0908842	0.451258
ENSG00000064687	ABCA7	ATP-binding cassette, sub-family A (ABC1), member 7 [Source:HGNC Symbol;Acc:HGNC:37]	protein_coding	2.39496e-17	1.15828	1.01584e-14	0.44872	0.0340535	1.18421	3.50724e-13	-0.709564	1.78324e-05	0.0259276	0.928236	0.735492	4.73281e-05
ENSG00000064703	DDX20	DEAD (Asp-Glu-Ala-Asp) box polypeptide 20 [Source:HGNC Symbol;Acc:HGNC:2743]	protein_coding	2.02446e-19	-1.29533	8.52285e-15	-0.413716	0.0799794	-1.35027	1.09778e-13	0.881613	1.67781e-06	-0.0549416	0.864589	-0.936554	3.13948e-06
ENSG00000064726	BTBD1	BTB (POZ) domain containing 1 [Source:HGNC Symbol;Acc:HGNC:1120]	protein_coding	0.00182716	0.0770573	0.5424	-0.369201	0.0143589	-0.101527	0.463041	-0.446258	0.000273142	-0.178585	0.265095	0.267673	0.057908
ENSG00000064763	FAR2	fatty acyl CoA reductase 2 [Source:HGNC Symbol;Acc:HGNC:25531]	protein_coding	5.32553e-08	0.723086	9.33901e-06	-0.218601	0.422489	0.394434	0.0348358	-0.941687	8.76041e-08	-0.328652	0.142631	0.613035	0.0019896
ENSG00000064787	BCAS1	breast carcinoma amplified sequence 1 [Source:HGNC Symbol;Acc:HGNC:974]	protein_coding	3.34604e-51	2.79666	1.20069e-39	0.834173	0.00387305	3.08514	4.70365e-41	-1.96248	2.54555e-17	0.288485	0.369882	2.25097	2.24016e-19
ENSG00000064932	SBNO2	strawberry notch homolog 2 (Drosophila) [Source:HGNC Symbol;Acc:HGNC:29158]	protein_coding	9.00008e-25	0.909612	2.48526e-18	-0.10913	0.559992	0.420497	0.000359227	-1.01874	1.7395e-19	-0.489115	0.000125091	0.529627	2.98592e-05
ENSG00000064933	PMS1	PMS1 postmeiotic segregation increased 1 (S. cerevisiae) [Source:HGNC Symbol;Acc:HGNC:9121]	protein_coding	8.10504e-32	-1.35494	7.15922e-21	-0.410013	0.0388044	-1.57965	1.55087e-23	0.944931	2.63918e-09	-0.224707	0.31653	-1.16964	1.27206e-11
ENSG00000064961	HMG20B	high mobility group 20B [Source:HGNC Symbol;Acc:HGNC:5002]	protein_coding	2.41858e-09	-0.396505	0.00255267	0.428124	0.013444	-0.269963	0.0703368	0.824629	2.30863e-09	0.126542	0.529582	-0.698087	4.34113e-06
ENSG00000064995	TAF11	TAF11 RNA polymerase II, TATA box binding protein (TBP)-associated factor, 28kDa [Source:HGNC Symbol;Acc:HGNC:11544]	protein_coding	0.838917	0.073773	0.503379	0.00330053	0.989133	-0.00482549	0.970393	-0.0704725	0.563942	-0.0785985	0.62169	-0.00812601	0.957215
ENSG00000064999	ANKS1A	ankyrin repeat and sterile alpha motif domain containing 1A [Source:HGNC Symbol;Acc:HGNC:20961]	protein_coding	0.0202339	0.185981	0.0436498	-0.0814752	0.605618	0.124377	0.237284	-0.267456	0.00655464	-0.0616043	0.674823	0.205852	0.0645505
ENSG00000065000	AP3D1	adaptor-related protein complex 3, delta 1 subunit [Source:HGNC Symbol;Acc:HGNC:568]	protein_coding	5.45608e-07	0.235727	3.19918e-05	-0.0666549	0.488495	0.0105949	0.890542	-0.302382	7.28875e-07	-0.225132	0.0011934	0.0772498	0.308631
ENSG00000065029	ZNF76	zinc finger protein 76 [Source:HGNC Symbol;Acc:HGNC:13149]	protein_coding	0.0428681	0.0727884	0.542878	0.21866	0.159634	0.283516	0.0168831	0.145872	0.240225	0.210727	0.145473	0.0648557	0.67116
ENSG00000065054	SLC9A3R2	solute carrier family 9, subfamily A (NHE3, cation proton antiporter 3), member 3 regulator 2 [Source:HGNC Symbol;Acc:HGNC:11076]	protein_coding	6.62881e-08	0.822037	1.39041e-08	0.412422	0.0433976	0.694357	1.39947e-05	-0.409615	0.0121928	-0.12768	0.581174	0.281935	0.13433
ENSG00000065057	NTHL1	nth endonuclease III-like 1 (E. coli) [Source:HGNC Symbol;Acc:HGNC:8028]	protein_coding	0.375464	0.300212	0.106965	0.103155	0.758485	0.172472	0.425269	-0.197056	0.350304	-0.12774	0.659479	0.0693162	0.794237
ENSG00000065060	UHRF1BP1	UHRF1 binding protein 1 [Source:HGNC Symbol;Acc:HGNC:21216]	protein_coding	0.217258	-0.207874	0.0762595	-0.178447	0.308825	-0.0621929	0.662631	0.0294275	0.841751	0.145681	0.377105	0.116254	0.446433
ENSG00000065135	GNAI3	guanine nucleotide binding protein (G protein), alpha inhibiting activity polypeptide 3 [Source:HGNC Symbol;Acc:HGNC:4387]	protein_coding	3.54352e-06	0.222216	0.00645896	-0.204361	0.0713703	-0.0786399	0.42423	-0.426577	7.36227e-07	-0.300856	0.00228465	0.125721	0.233017
ENSG00000065150	IPO5	importin 5 [Source:HGNC Symbol;Acc:HGNC:6402]	protein_coding	1.89277e-28	-1.04589	3.04237e-19	-0.253647	0.142737	-1.16065	5.51701e-20	0.792248	5.45431e-10	-0.114759	0.547301	-0.907007	5.8605e-11
ENSG00000065154	OAT	ornithine aminotransferase [Source:HGNC Symbol;Acc:HGNC:8091]	protein_coding	0.0339062	-0.224	0.28343	0.183431	0.589133	0.344916	0.123608	0.407431	0.0626306	0.568916	0.0205629	0.161485	0.550023
ENSG00000065183	WDR3	WD repeat domain 3 [Source:HGNC Symbol;Acc:HGNC:12755]	protein_coding	5.48737e-56	-1.42348	1.77112e-41	-0.650479	2.77332e-07	-1.46893	1.05921e-37	0.773005	3.58073e-11	-0.0454437	0.820212	-0.818449	1.09754e-10
ENSG00000065243	PKN2	protein kinase N2 [Source:HGNC Symbol;Acc:HGNC:9406]	protein_coding	0.239719	-0.105038	0.534375	-0.328216	0.135591	-0.134797	0.46687	-0.223178	0.204585	-0.0297586	0.915497	0.193419	0.337088
ENSG00000065268	WDR18	WD repeat domain 18 [Source:HGNC Symbol;Acc:HGNC:17956]	protein_coding	2.1743e-09	-0.579838	4.49898e-05	0.0840445	0.753646	-0.728939	2.29139e-06	0.663883	1.51558e-05	-0.149101	0.498487	-0.812983	1.03529e-06
ENSG00000065308	TRAM2	translocation associated membrane protein 2 [Source:HGNC Symbol;Acc:HGNC:16855]	protein_coding	1.38396e-16	0.371255	0.00017434	-0.438764	0.000548026	-0.334114	0.00264363	-0.810019	1.56678e-14	-0.705369	4.5291e-10	0.10465	0.449699
ENSG00000065320	NTN1	netrin 1 [Source:HGNC Symbol;Acc:HGNC:8029]	protein_coding	1.635e-10	-1.5629	1.48506e-06	0.605519	0.182123	-0.868438	0.014558	2.16842	2.35346e-10	0.694463	0.12532	-1.47396	6.58567e-05
ENSG00000065328	MCM10	minichromosome maintenance complex component 10 [Source:HGNC Symbol;Acc:HGNC:18043]	protein_coding	1.62377e-193	-4.89473	2.00041e-89	-0.410528	0.0742682	-5.53964	1.35245e-72	4.48421	6.31681e-70	-0.644911	0.180642	-5.12912	3.93732e-59
ENSG00000065357	DGKA	diacylglycerol kinase, alpha 80kDa [Source:HGNC Symbol;Acc:HGNC:2849]	protein_coding	1.8468e-50	1.08623	1.31055e-30	-0.293004	0.0292982	0.631155	1.61919e-09	-1.37924	1.38743e-41	-0.455076	8.74373e-05	0.92416	1.45732e-16
ENSG00000065361	ERBB3	erb-b2 receptor tyrosine kinase 3 [Source:HGNC Symbol;Acc:HGNC:3431]	protein_coding	1.31111e-31	0.925795	5.72189e-19	0.319378	0.029471	1.19596	2.04716e-26	-0.606417	1.20381e-07	0.270161	0.0543433	0.876578	1.02339e-12
ENSG00000065427	KARS	lysyl-tRNA synthetase [Source:HGNC Symbol;Acc:HGNC:6215]	protein_coding	1.8533e-10	-0.438609	2.48681e-05	-0.0882546	0.639684	-0.68341	9.88758e-10	0.350354	0.0022958	-0.244802	0.0801927	-0.595155	1.15599e-06
ENSG00000065457	ADAT1	adenosine deaminase, tRNA-specific 1 [Source:HGNC Symbol;Acc:HGNC:228]	protein_coding	1.10817e-14	-1.016	1.08124e-12	-0.410619	0.0346376	-0.959631	6.14833e-10	0.605385	0.000142531	0.0563724	0.832682	-0.549012	0.00172986
ENSG00000065485	PDIA5	protein disulfide isomerase family A, member 5 [Source:HGNC Symbol;Acc:HGNC:24811]	protein_coding	0.20904	0.106779	0.401674	0.254426	0.128972	0.155368	0.257485	0.147647	0.278435	0.0485885	0.809934	-0.0990584	0.538095
ENSG00000065491	TBC1D22B	TBC1 domain family, member 22B [Source:HGNC Symbol;Acc:HGNC:21602]	protein_coding	7.33771e-11	0.593861	1.79099e-09	0.128763	0.44258	0.5289	9.14622e-07	-0.465098	1.59032e-05	-0.0649613	0.693243	0.400136	0.000758021
ENSG00000065518	NDUFB4	NADH dehydrogenase (ubiquinone) 1 beta subcomplex, 4, 15kDa [Source:HGNC Symbol;Acc:HGNC:7699]	protein_coding	0.0293187	0.0337969	0.768612	-0.00505638	0.983563	-0.258279	0.0197059	-0.0388533	0.759673	-0.292076	0.0199387	-0.253223	0.0378745
ENSG00000065526	SPEN	spen family transcriptional repressor [Source:HGNC Symbol;Acc:HGNC:17575]	protein_coding	0.436466	-0.153193	0.316402	-0.236383	0.281455	-0.0960179	0.588373	-0.0831904	0.639665	0.0571749	0.817473	0.140365	0.467935
ENSG00000065534	MYLK	myosin light chain kinase [Source:HGNC Symbol;Acc:HGNC:7590]	protein_coding	0.129591	0.0299643	0.818347	-0.19496	0.252435	0.0864287	0.530254	-0.224924	0.0740516	0.0564644	0.764848	0.281389	0.0405516
ENSG00000065548	ZC3H15	zinc finger CCCH-type containing 15 [Source:HGNC Symbol;Acc:HGNC:29528]	protein_coding	9.1045e-12	-0.323596	1.74708e-05	-0.304067	0.00174274	-0.574474	1.1458e-12	0.019529	0.845019	-0.250878	0.00908745	-0.270407	0.00331766
ENSG00000065559	MAP2K4	mitogen-activated protein kinase kinase 4 [Source:HGNC Symbol;Acc:HGNC:6844]	protein_coding	0.0657683	-0.0669429	0.595775	-0.309327	0.0438166	-0.111807	0.408202	-0.242384	0.0549783	-0.0448642	0.819287	0.19752	0.169103
ENSG00000065600	TMEM206	transmembrane protein 206 [Source:HGNC Symbol;Acc:HGNC:25593]	protein_coding	1.40358e-05	-0.876898	2.22561e-05	-0.175924	0.619183	-0.752948	0.000863978	0.700974	0.00206964	0.123949	0.73241	-0.577024	0.0225009
ENSG00000065613	SLK	STE20-like kinase [Source:HGNC Symbol;Acc:HGNC:11088]	protein_coding	1.71153e-11	0.463658	0.000600752	-0.580825	0.000733243	0.109902	0.511298	-1.04448	2.25624e-13	-0.353756	0.0431394	0.690727	1.32526e-05
ENSG00000065615	CYB5R4	cytochrome b5 reductase 4 [Source:HGNC Symbol;Acc:HGNC:20147]	protein_coding	0.0036901	0.268177	0.0305359	-0.171979	0.37789	0.165434	0.245165	-0.440156	0.00084674	-0.102743	0.588513	0.337413	0.0231302
ENSG00000065618	COL17A1	collagen, type XVII, alpha 1 [Source:HGNC Symbol;Acc:HGNC:2194]	protein_coding	1.82792e-13	1.87722	1.73932e-09	-0.412119	0.434981	1.31566	0.000153019	-2.28934	1.07737e-11	-0.561565	0.205475	1.72778	3.55657e-06
ENSG00000065621	GSTO2	glutathione S-transferase omega 2 [Source:HGNC Symbol;Acc:HGNC:23064]	protein_coding	2.49165e-13	-0.602985	1.87449e-09	0.0543236	0.778555	-0.498884	5.95992e-06	0.657308	1.32569e-09	0.104101	0.512006	-0.553208	3.28596e-06
ENSG00000065665	SEC61A2	Sec61 alpha 2 subunit (S. cerevisiae) [Source:HGNC Symbol;Acc:HGNC:17702]	protein_coding	0.62829	-0.219232	0.335928	0.0157105	0.973626	0.0188962	0.945522	0.234942	0.3433	0.238128	0.448391	0.00318573	0.992107
ENSG00000065717	TLE2	transducin-like enhancer of split 2 [Source:HGNC Symbol;Acc:HGNC:11838]	protein_coding	9.8897e-06	-1.50115	1.68937e-05	0.184734	0.765041	-0.558794	0.15032	1.68588	5.90334e-06	0.942356	0.040655	-0.743528	0.0729747
ENSG00000065802	ASB1	ankyrin repeat and SOCS box containing 1 [Source:HGNC Symbol;Acc:HGNC:16011]	protein_coding	5.21925e-05	0.20835	0.0436667	-0.28877	0.035679	0.0765316	0.539017	-0.49712	3.83238e-06	-0.131818	0.365666	0.365302	0.00242172
ENSG00000065809	FAM107B	family with sequence similarity 107, member B [Source:HGNC Symbol;Acc:HGNC:23726]	protein_coding	1.02047e-22	0.585747	1.99986e-09	-0.434451	0.000647123	0.366562	0.000826937	-1.0202	2.03109e-22	-0.219186	0.100225	0.801012	2.89037e-12
ENSG00000065833	ME1	malic enzyme 1, NADP(+)-dependent, cytosolic [Source:HGNC Symbol;Acc:HGNC:6983]	protein_coding	1.0111e-21	-2.23128	7.81758e-16	-0.310981	0.495608	-2.24161	1.05981e-13	1.9203	1.66901e-10	-0.0103268	0.985885	-1.93063	3.85953e-09
ENSG00000065882	TBC1D1	TBC1 (tre-2/USP6, BUB2, cdc16) domain family, member 1 [Source:HGNC Symbol;Acc:HGNC:11578]	protein_coding	4.33136e-12	0.934571	1.18805e-10	0.110197	0.689573	0.716294	8.20694e-06	-0.824374	1.97503e-07	-0.218277	0.303755	0.606097	0.00061711
ENSG00000065883	CDK13	cyclin-dependent kinase 13 [Source:HGNC Symbol;Acc:HGNC:1733]	protein_coding	0.000119411	0.352451	0.00145875	-0.0401371	0.857096	0.349622	0.00412895	-0.392588	0.00109296	-0.00282925	0.989886	0.389759	0.00325299
ENSG00000065911	MTHFD2	methylenetetrahydrofolate dehydrogenase (NADP+ dependent) 2, methenyltetrahydrofolate cyclohydrolase [Source:HGNC Symbol;Acc:HGNC:7434]	protein_coding	1.61914e-18	-0.465485	3.92907e-09	-0.517671	4.20456e-08	-0.71665	5.40233e-17	-0.0521859	0.608048	-0.251165	0.0162525	-0.198979	0.0508955
ENSG00000065923	SLC9A7	solute carrier family 9, subfamily A (NHE7, cation proton antiporter 7), member 7 [Source:HGNC Symbol;Acc:HGNC:17123]	protein_coding	1.71098e-23	-0.833452	1.56273e-18	-0.156824	0.300751	-0.753231	3.06515e-13	0.676627	6.37414e-11	0.0802207	0.612029	-0.596406	1.39588e-07
ENSG00000065970	FOXJ2	forkhead box J2 [Source:HGNC Symbol;Acc:HGNC:24818]	protein_coding	0.47582	0.0217719	0.87061	0.0518674	0.810959	0.172495	0.18278	0.0300955	0.835882	0.150723	0.349367	0.120627	0.420413
ENSG00000065978	YBX1	Y box binding protein 1 [Source:HGNC Symbol;Acc:HGNC:8014]	protein_coding	1.42598e-12	-0.751349	2.19398e-06	-0.0377852	0.911439	-1.08582	2.184e-10	0.713564	3.88647e-05	-0.334471	0.124046	-1.04804	1.8022e-08
ENSG00000065989	PDE4A	phosphodiesterase 4A, cAMP-specific [Source:HGNC Symbol;Acc:HGNC:8780]	protein_coding	0.303385	0.244124	0.58517	0.182113	0.813203	0.747751	0.0939967	-0.0620109	0.907232	0.503628	0.375219	0.565639	0.264084
ENSG00000066027	PPP2R5A	protein phosphatase 2, regulatory subunit B', alpha [Source:HGNC Symbol;Acc:HGNC:9309]	protein_coding	1.58683e-25	0.580255	1.6968e-12	-0.0276288	0.874482	0.729221	1.69347e-16	-0.607884	9.68828e-12	0.148966	0.19986	0.75685	2.65375e-15
ENSG00000066044	ELAVL1	ELAV like RNA binding protein 1 [Source:HGNC Symbol;Acc:HGNC:3312]	protein_coding	1.3674e-17	-0.561338	4.97429e-10	-0.286765	0.0196954	-0.810606	1.11716e-16	0.274573	0.00718146	-0.249268	0.040739	-0.523841	1.31391e-06
ENSG00000066084	DIP2B	DIP2 disco-interacting protein 2 homolog B (Drosophila) [Source:HGNC Symbol;Acc:HGNC:29284]	protein_coding	3.54068e-10	0.56967	5.34122e-05	-0.433976	0.0243871	0.106062	0.550575	-1.00365	2.35768e-11	-0.463607	0.00884474	0.540038	0.00151339
ENSG00000066117	SMARCD1	SWI/SNF related, matrix associated, actin dependent regulator of chromatin, subfamily d, member 1 [Source:HGNC Symbol;Acc:HGNC:11106]	protein_coding	6.11669e-06	0.345171	9.76963e-06	-0.00327317	0.98676	0.0879802	0.355825	-0.348444	4.18792e-05	-0.25719	0.00904438	0.0912534	0.392312
ENSG00000066135	KDM4A	lysine (K)-specific demethylase 4A [Source:HGNC Symbol;Acc:HGNC:22978]	protein_coding	8.17826e-06	-0.232748	0.0158132	0.269114	0.0345792	0.0172719	0.890974	0.501861	5.41479e-07	0.25002	0.0409004	-0.251842	0.0284233
ENSG00000066136	NFYC	nuclear transcription factor Y, gamma [Source:HGNC Symbol;Acc:HGNC:7806]	protein_coding	0.489771	0.0922497	0.408537	0.141755	0.383762	0.0059447	0.965464	0.049505	0.700668	-0.086305	0.591673	-0.13581	0.310676
ENSG00000066185	ZMYND12	zinc finger, MYND-type containing 12 [Source:HGNC Symbol;Acc:HGNC:21192]	protein_coding	0.426713	0.682526	0.165594	0.582002	0.445179	0.659473	0.226336	-0.100524	0.867641	-0.0230531	0.977414	0.0774709	0.912488
ENSG00000066230	SLC9A3	solute carrier family 9, subfamily A (NHE3, cation proton antiporter 3), member 3 [Source:HGNC Symbol;Acc:HGNC:11073]	protein_coding	5.93974e-09	-3.30654	1.09582e-07	-0.220215	0.839494	-2.63628	4.76336e-05	3.08632	3.76317e-06	0.670262	0.514513	-2.41606	0.00060477
ENSG00000066248	NGEF	neuronal guanine nucleotide exchange factor [Source:HGNC Symbol;Acc:HGNC:7807]	protein_coding	4.05807e-05	0.425265	0.00440055	-0.307178	0.159024	0.119782	0.513279	-0.732443	3.86711e-06	-0.305482	0.125816	0.426961	0.0187415
ENSG00000066279	ASPM	asp (abnormal spindle) homolog, microcephaly associated (Drosophila) [Source:HGNC Symbol;Acc:HGNC:19048]	protein_coding	3.21581e-26	-4.12642	9.3265e-24	-0.486312	0.494159	-3.68539	1.63743e-16	3.64011	3.51527e-16	0.441037	0.498487	-3.19908	4.98256e-11
ENSG00000066322	ELOVL1	ELOVL fatty acid elongase 1 [Source:HGNC Symbol;Acc:HGNC:14418]	protein_coding	9.15347e-19	0.746966	6.37137e-13	-0.159503	0.351571	0.413559	0.000401039	-0.906469	6.84578e-16	-0.333407	0.0129132	0.573062	4.50766e-06
ENSG00000066379	ZNRD1	zinc ribbon domain containing 1 [Source:HGNC Symbol;Acc:HGNC:13182]	protein_coding	0.0150915	0.3132	0.0076262	-0.0131016	0.961234	0.165514	0.22567	-0.326301	0.0107404	-0.147685	0.383543	0.178616	0.236011
ENSG00000066405	CLDN18	claudin 18 [Source:HGNC Symbol;Acc:HGNC:2039]	protein_coding	2.01938e-10	2.31296	2.88604e-07	-0.148081	0.883842	2.32536	1.87509e-06	-2.46104	7.17366e-07	0.0124024	0.988263	2.47344	4.14083e-06
ENSG00000066422	ZBTB11	zinc finger and BTB domain containing 11 [Source:HGNC Symbol;Acc:HGNC:16740]	protein_coding	0.0397947	-0.175078	0.202012	-0.392423	0.0241514	-0.191912	0.204502	-0.217345	0.144203	-0.0168344	0.945533	0.200511	0.233627
ENSG00000066427	ATXN3	ataxin 3 [Source:HGNC Symbol;Acc:HGNC:7106]	protein_coding	0.0532777	0.0168187	0.90128	0.106547	0.579537	0.290979	0.0182542	0.0897283	0.508511	0.274161	0.0593059	0.184432	0.192641
ENSG00000066455	GOLGA5	golgin A5 [Source:HGNC Symbol;Acc:HGNC:4428]	protein_coding	8.76713e-10	0.47582	4.02686e-09	0.0709234	0.632945	0.352238	8.81842e-05	-0.404897	4.85187e-06	-0.123582	0.294293	0.281315	0.00480075
ENSG00000066468	FGFR2	fibroblast growth factor receptor 2 [Source:HGNC Symbol;Acc:HGNC:3689]	protein_coding	0.00031131	-0.205424	0.389714	-0.00344423	0.995349	0.704397	0.00315032	0.20198	0.443977	0.909821	0.000470004	0.707841	0.00681763
ENSG00000066557	LRRC40	leucine rich repeat containing 40 [Source:HGNC Symbol;Acc:HGNC:26004]	protein_coding	1.57626e-11	-0.998218	3.05657e-09	-0.182619	0.514892	-0.957343	1.77015e-07	0.815599	9.6574e-06	0.0408751	0.901623	-0.774724	0.000123328
ENSG00000066583	ISOC1	isochorismatase domain containing 1 [Source:HGNC Symbol;Acc:HGNC:24254]	protein_coding	2.81837e-06	-0.430467	1.02896e-05	-0.223449	0.106752	-0.459196	1.56275e-05	0.207018	0.0642534	-0.028729	0.875642	-0.235747	0.0548862
ENSG00000066651	TRMT11	tRNA methyltransferase 11 homolog (S. cerevisiae) [Source:HGNC Symbol;Acc:HGNC:21080]	protein_coding	2.91983e-05	-0.465103	0.00177229	-0.219004	0.343555	-0.713149	9.23141e-06	0.246099	0.149048	-0.248046	0.2478	-0.494145	0.00614517
ENSG00000066654	THUMPD1	THUMP domain containing 1 [Source:HGNC Symbol;Acc:HGNC:23807]	protein_coding	0.00440752	-0.267151	0.00180178	-0.000721928	0.997761	-0.0498865	0.642024	0.266429	0.00430149	0.217265	0.0505493	-0.0491645	0.68894
ENSG00000066697	MSANTD3	Myb/SANT-like DNA-binding domain containing 3 [Source:HGNC Symbol;Acc:HGNC:23370]	protein_coding	0.187108	-0.0269867	0.930365	-0.205862	0.658682	-0.557028	0.0591912	-0.178875	0.575674	-0.530041	0.131355	-0.351166	0.306114
ENSG00000066739	ATG2B	autophagy related 2B [Source:HGNC Symbol;Acc:HGNC:20187]	protein_coding	3.81871e-05	0.177756	0.229733	0.214724	0.327867	0.665838	7.67162e-06	0.0369681	0.837995	0.488082	0.00405355	0.451114	0.00692469
ENSG00000066777	ARFGEF1	ADP-ribosylation factor guanine nucleotide-exchange factor 1 (brefeldin A-inhibited) [Source:HGNC Symbol;Acc:HGNC:15772]	protein_coding	5.4832e-06	0.365334	0.00170833	-0.118654	0.55349	0.410246	0.00126954	-0.483988	0.000111522	0.044912	0.825154	0.5289	0.000109487
ENSG00000066827	ZFAT	zinc finger and AT hook domain containing [Source:HGNC Symbol;Acc:HGNC:19899]	protein_coding	7.95521e-08	0.532333	1.55126e-07	0.0823742	0.661038	0.392094	0.00050601	-0.449959	4.96553e-05	-0.140239	0.344705	0.30972	0.0135361
ENSG00000066855	MTFR1	mitochondrial fission regulator 1 [Source:HGNC Symbol;Acc:HGNC:29510]	protein_coding	0.000260173	-0.241221	0.0363159	-0.339324	0.0243194	-0.492272	5.30899e-05	-0.0981036	0.47263	-0.251051	0.097018	-0.152948	0.305473
ENSG00000066926	FECH	ferrochelatase [Source:HGNC Symbol;Acc:HGNC:3647]	protein_coding	0.0726286	-0.294969	0.0546931	-0.142815	0.578322	-0.369615	0.0267111	0.152154	0.392355	-0.0746459	0.769885	-0.2268	0.240531
ENSG00000066933	MYO9A	myosin IXA [Source:HGNC Symbol;Acc:HGNC:7608]	protein_coding	0.128967	0.127885	0.450425	0.0447215	0.888818	0.360748	0.0371165	-0.0831635	0.668792	0.232863	0.286005	0.316027	0.102134
ENSG00000067057	PFKP	phosphofructokinase, platelet [Source:HGNC Symbol;Acc:HGNC:8878]	protein_coding	1.133e-19	0.890068	1.87314e-08	-0.685213	0.000907416	0.0454063	0.832107	-1.57528	1.30464e-20	-0.844661	7.01458e-06	0.73062	0.000134641
ENSG00000067064	IDI1	isopentenyl-diphosphate delta isomerase 1 [Source:HGNC Symbol;Acc:HGNC:5387]	protein_coding	0.000122993	0.549655	0.0152412	-0.367762	0.290132	-0.292473	0.268141	-0.917418	0.000135035	-0.842128	0.00186329	0.0752893	0.822776
ENSG00000067066	SP100	SP100 nuclear antigen [Source:HGNC Symbol;Acc:HGNC:11206]	protein_coding	8.85488e-17	0.420813	7.71209e-08	-0.277867	0.00864352	0.235888	0.00795266	-0.69868	8.75816e-17	-0.184924	0.0802159	0.513756	2.84214e-08
ENSG00000067082	KLF6	Kruppel-like factor 6 [Source:HGNC Symbol;Acc:HGNC:2235]	protein_coding	2.13822e-23	1.6758	2.90102e-18	-0.0871709	0.825316	0.768546	0.000407311	-1.76297	2.78828e-17	-0.907255	0.00011647	0.855717	0.000286417
ENSG00000067113	PPAP2A	phosphatidic acid phosphatase type 2A [Source:HGNC Symbol;Acc:HGNC:9228]	protein_coding	3.61892e-06	-0.140309	0.407276	0.540011	0.00678275	0.489983	0.00354942	0.68032	3.48363e-05	0.630292	0.000617198	-0.0500282	0.826451
ENSG00000067141	NEO1	neogenin 1 [Source:HGNC Symbol;Acc:HGNC:7754]	protein_coding	0.159888	-0.206555	0.293312	0.199488	0.51562	0.121838	0.592676	0.406043	0.0466061	0.328393	0.192387	-0.0776501	0.77291
ENSG00000067167	TRAM1	translocation associated membrane protein 1 [Source:HGNC Symbol;Acc:HGNC:20568]	protein_coding	1.14137e-06	0.546457	0.00119537	-0.16286	0.580661	0.666639	0.000277347	-0.709317	9.39626e-05	0.120182	0.661087	0.8295	2.65702e-05
ENSG00000067177	PHKA1	phosphorylase kinase, alpha 1 (muscle) [Source:HGNC Symbol;Acc:HGNC:8925]	protein_coding	1.06442e-06	0.369111	0.00404029	-0.371082	0.03379	0.0664408	0.684001	-0.740193	4.90785e-08	-0.30267	0.071393	0.437523	0.00452961
ENSG00000067182	TNFRSF1A	tumor necrosis factor receptor superfamily, member 1A [Source:HGNC Symbol;Acc:HGNC:11916]	protein_coding	3.62563e-38	0.987397	3.22362e-32	0.0725511	0.645007	0.500831	7.67098e-08	-0.914846	6.57985e-24	-0.486566	1.09196e-06	0.428279	2.84322e-05
ENSG00000067191	CACNB1	calcium channel, voltage-dependent, beta 1 subunit [Source:HGNC Symbol;Acc:HGNC:1401]	protein_coding	1.35082e-22	1.42298	5.44294e-18	0.17913	0.542398	1.23519	6.85597e-12	-1.24385	3.96134e-12	-0.187792	0.457991	1.05606	8.06078e-08
ENSG00000067208	EVI5	ecotropic viral integration site 5 [Source:HGNC Symbol;Acc:HGNC:3501]	protein_coding	0.774775	-0.139875	0.409587	-0.0360786	0.911003	0.00350006	0.986354	0.103796	0.587972	0.143375	0.551946	0.0395786	0.865338
ENSG00000067221	STOML1	stomatin (EPB72)-like 1 [Source:HGNC Symbol;Acc:HGNC:14560]	protein_coding	2.85594e-15	0.961772	3.83554e-11	-0.133603	0.621924	0.633569	9.71305e-05	-1.09538	4.30745e-12	-0.328204	0.0967189	0.767171	1.27025e-05
ENSG00000067225	PKM	pyruvate kinase, muscle [Source:HGNC Symbol;Acc:HGNC:9021]	protein_coding	0.00190683	-0.36242	0.113418	-0.521868	0.0931357	-0.876022	0.000230002	-0.159448	0.553851	-0.513602	0.0746124	-0.354154	0.211176
ENSG00000067248	DHX29	DEAH (Asp-Glu-Ala-His) box polypeptide 29 [Source:HGNC Symbol;Acc:HGNC:15815]	protein_coding	0.0315296	-0.235124	0.031352	-0.225897	0.142304	-0.292613	0.0136775	0.00922709	0.950032	-0.0574892	0.751243	-0.0667163	0.663628
ENSG00000067334	DNTTIP2	deoxynucleotidyltransferase, terminal, interacting protein 2 [Source:HGNC Symbol;Acc:HGNC:24013]	protein_coding	1.43343e-06	-0.275221	0.00354812	-0.277261	0.02828	-0.53175	1.17575e-07	-0.00204034	0.987104	-0.256529	0.0351822	-0.254489	0.0279936
ENSG00000067365	METTL22	methyltransferase like 22 [Source:HGNC Symbol;Acc:HGNC:28368]	protein_coding	0.227204	-0.152246	0.270286	0.111344	0.619381	0.056421	0.730279	0.26359	0.0676097	0.208667	0.249656	-0.0549234	0.770298
ENSG00000067369	TP53BP1	tumor protein p53 binding protein 1 [Source:HGNC Symbol;Acc:HGNC:11999]	protein_coding	0.00285593	-0.159327	0.160373	0.25085	0.0985342	0.0900483	0.494153	0.410178	0.000401628	0.249376	0.0791719	-0.160802	0.24702
ENSG00000067533	RRP15	ribosomal RNA processing 15 homolog (S. cerevisiae) [Source:HGNC Symbol;Acc:HGNC:24255]	protein_coding	5.26126e-22	-1.04207	2.04477e-15	-0.352099	0.0510404	-1.17564	2.05631e-16	0.689974	1.9342e-06	-0.13357	0.540626	-0.823544	1.75144e-07
ENSG00000067560	RHOA	ras homolog family member A [Source:HGNC Symbol;Acc:HGNC:667]	protein_coding	2.68492e-15	0.5625	4.72499e-13	-0.00679366	0.971904	0.257366	0.00368401	-0.569294	1.612e-11	-0.305134	0.00170661	0.26416	0.00646024
ENSG00000067596	DHX8	DEAH (Asp-Glu-Ala-His) box polypeptide 8 [Source:HGNC Symbol;Acc:HGNC:2749]	protein_coding	0.00103235	0.302287	0.000978727	0.000221025	0.999245	0.212006	0.040549	-0.302066	0.00253691	-0.0902809	0.519819	0.211785	0.0634023
ENSG00000067601	PMS2P4	postmeiotic segregation increased 2 pseudogene 4 [Source:HGNC Symbol;Acc:HGNC:9129]	transcribed_unprocessed_pseudogene	0.241227	0.624509	0.0628799	0.306482	0.586546	0.15922	0.707579	-0.318027	0.403268	-0.465289	0.318667	-0.147262	0.757978
ENSG00000067606	PRKCZ	protein kinase C, zeta [Source:HGNC Symbol;Acc:HGNC:9412]	protein_coding	0.0705231	-0.0762267	0.503095	0.185089	0.229347	0.114222	0.351008	0.261315	0.0211854	0.190449	0.176499	-0.0708666	0.624352
ENSG00000067704	IARS2	isoleucyl-tRNA synthetase 2, mitochondrial [Source:HGNC Symbol;Acc:HGNC:29685]	protein_coding	3.99022e-25	-0.684537	4.41827e-21	-0.299755	0.00176258	-0.653483	1.38089e-16	0.384783	1.76957e-06	0.0310548	0.815021	-0.353728	6.47423e-05
ENSG00000067798	NAV3	neuron navigator 3 [Source:HGNC Symbol;Acc:HGNC:15998]	protein_coding	0.0075962	2.55368	0.00226783	0.928423	0.521382	0.657296	0.543586	-1.62526	0.0710569	-1.89638	0.0787237	-0.271128	0.829538
ENSG00000067829	IDH3G	isocitrate dehydrogenase 3 (NAD+) gamma [Source:HGNC Symbol;Acc:HGNC:5386]	protein_coding	0.010121	0.351235	0.00122996	0.163221	0.344077	0.124582	0.338957	-0.188014	0.129348	-0.226653	0.120582	-0.0386393	0.813715
ENSG00000067836	ROGDI	rogdi homolog (Drosophila) [Source:HGNC Symbol;Acc:HGNC:29478]	protein_coding	8.20172e-09	-0.203357	0.166007	0.647304	9.74344e-05	0.202902	0.204676	0.850661	3.59457e-09	0.40626	0.0204709	-0.444401	0.00613105
ENSG00000067900	ROCK1	Rho-associated, coiled-coil containing protein kinase 1 [Source:HGNC Symbol;Acc:HGNC:10251]	protein_coding	0.0381234	0.116355	0.393877	-0.244935	0.188158	0.0907051	0.560797	-0.36129	0.00871459	-0.0256495	0.911522	0.33564	0.0288306
ENSG00000067955	CBFB	core-binding factor, beta subunit [Source:HGNC Symbol;Acc:HGNC:1539]	protein_coding	6.7443e-15	-0.319566	0.00183435	-0.751654	2.04214e-10	-0.711452	6.93771e-11	-0.432088	0.000109842	-0.391887	0.00195567	0.0402014	0.796886
ENSG00000067992	PDK3	pyruvate dehydrogenase kinase, isozyme 3 [Source:HGNC Symbol;Acc:HGNC:8811]	protein_coding	8.99349e-29	-1.31351	2.91622e-23	-0.138057	0.536515	-1.01264	1.19482e-12	1.17545	2.07517e-16	0.300871	0.111019	-0.874579	1.78476e-08
ENSG00000068001	HYAL2	hyaluronoglucosaminidase 2 [Source:HGNC Symbol;Acc:HGNC:5321]	protein_coding	1.66204e-15	0.443037	1.56169e-08	-0.152145	0.209871	-0.117665	0.217377	-0.595182	2.01036e-12	-0.560702	6.50651e-10	0.0344795	0.775514
ENSG00000068024	HDAC4	histone deacetylase 4 [Source:HGNC Symbol;Acc:HGNC:14063]	protein_coding	5.44623e-15	-1.16043	6.42399e-13	-0.754559	0.000241106	-1.10992	2.83989e-10	0.405871	0.0296266	0.0505096	0.869349	-0.355361	0.0903974
ENSG00000068028	RASSF1	Ras association (RalGDS/AF-6) domain family member 1 [Source:HGNC Symbol;Acc:HGNC:9882]	protein_coding	6.80559e-12	-0.726543	4.59886e-10	-0.0723998	0.738542	-0.585829	4.21427e-06	0.654143	2.45669e-07	0.140714	0.438268	-0.51343	0.000236498
ENSG00000068078	FGFR3	fibroblast growth factor receptor 3 [Source:HGNC Symbol;Acc:HGNC:3690]	protein_coding	0.0220031	0.0605518	0.608486	0.26858	0.0643656	0.263623	0.0239569	0.208028	0.0775091	0.203071	0.152453	-0.00495636	0.975809
ENSG00000068079	IFI35	interferon-induced protein 35 [Source:HGNC Symbol;Acc:HGNC:5399]	protein_coding	0.0854839	0.286323	0.0423025	-0.0302065	0.916618	0.0599813	0.734009	-0.316529	0.0389612	-0.226341	0.238915	0.0901878	0.645998
ENSG00000068097	HEATR6	HEAT repeat containing 6 [Source:HGNC Symbol;Acc:HGNC:24076]	protein_coding	0.131507	-0.156612	0.248548	0.105511	0.63446	0.121058	0.424778	0.262123	0.0649711	0.27767	0.0998657	0.0155465	0.934218
ENSG00000068120	COASY	CoA synthase [Source:HGNC Symbol;Acc:HGNC:29932]	protein_coding	0.47891	-0.012242	0.908998	0.0606699	0.711369	-0.0951288	0.371399	0.072912	0.4975	-0.0828868	0.545031	-0.155799	0.168604
ENSG00000068137	PLEKHH3	pleckstrin homology domain containing, family H (with MyTH4 domain) member 3 [Source:HGNC Symbol;Acc:HGNC:26105]	protein_coding	2.14752e-09	0.588746	5.59879e-05	0.562717	0.0030237	0.988538	1.74696e-10	-0.026029	0.894458	0.399791	0.0322444	0.42582	0.016282
ENSG00000068305	MEF2A	myocyte enhancer factor 2A [Source:HGNC Symbol;Acc:HGNC:6993]	protein_coding	5.6698e-07	0.445115	0.000623635	-0.294346	0.119278	0.228221	0.130901	-0.739462	1.03921e-07	-0.216894	0.234245	0.522568	0.000781819
ENSG00000068308	OTUD5	OTU deubiquitinase 5 [Source:HGNC Symbol;Acc:HGNC:25402]	protein_coding	4.18112e-31	0.698118	6.50192e-23	0.360957	6.64135e-05	0.803046	6.59011e-26	-0.337161	1.66507e-05	0.104928	0.314217	0.442089	1.45482e-07
ENSG00000068323	TFE3	transcription factor binding to IGHM enhancer 3 [Source:HGNC Symbol;Acc:HGNC:11752]	protein_coding	3.01697e-23	0.815772	3.93049e-20	0.0561785	0.74784	0.435665	1.18109e-05	-0.759594	3.42702e-15	-0.380107	0.000548895	0.379487	0.000519019
ENSG00000068354	TBC1D25	TBC1 domain family, member 25 [Source:HGNC Symbol;Acc:HGNC:8092]	protein_coding	5.82636e-64	1.3163	7.37664e-50	0.160712	0.268669	1.04132	4.80478e-27	-1.15559	2.16992e-33	-0.274979	0.016736	0.880611	4.22136e-17
ENSG00000068366	ACSL4	acyl-CoA synthetase long-chain family member 4 [Source:HGNC Symbol;Acc:HGNC:3571]	protein_coding	2.06519e-06	-0.584249	0.000164863	-0.310483	0.177616	-0.818552	1.02282e-06	0.273767	0.125309	-0.234303	0.295111	-0.508069	0.00726533
ENSG00000068383	INPP5A	inositol polyphosphate-5-phosphatase, 40kDa [Source:HGNC Symbol;Acc:HGNC:6076]	protein_coding	0.0776607	0.24995	0.0857046	-0.0854558	0.745937	0.187357	0.255442	-0.335405	0.0314791	-0.0625923	0.794437	0.272813	0.123311
ENSG00000068394	GPKOW	G patch domain and KOW motifs [Source:HGNC Symbol;Acc:HGNC:30677]	protein_coding	7.65979e-06	0.490069	7.05517e-06	0.051984	0.810959	0.326011	0.00799184	-0.438085	0.000247255	-0.164059	0.29735	0.274027	0.0454509
ENSG00000068400	GRIPAP1	GRIP1 associated protein 1 [Source:HGNC Symbol;Acc:HGNC:18706]	protein_coding	0.00254592	0.250509	0.000682965	0.18858	0.066465	0.224332	0.00601635	-0.0619286	0.489012	-0.0261771	0.842748	0.0357515	0.741131
ENSG00000068438	FTSJ1	FtsJ RNA methyltransferase homolog 1 (E. coli) [Source:HGNC Symbol;Acc:HGNC:13254]	protein_coding	0.00161503	0.39646	0.0161082	-0.220143	0.4034	-0.0505238	0.81196	-0.616604	0.000438802	-0.446984	0.0309855	0.16962	0.441882
ENSG00000068489	PRR11	proline rich 11 [Source:HGNC Symbol;Acc:HGNC:25619]	protein_coding	2.96353e-16	-3.50419	3.32714e-13	-0.567456	0.491456	-3.71121	1.62217e-12	2.93674	2.30872e-08	-0.207017	0.813733	-3.14376	4.27458e-08
ENSG00000068650	ATP11A	ATPase, class VI, type 11A [Source:HGNC Symbol;Acc:HGNC:13552]	protein_coding	1.45762e-08	0.201908	0.0247503	-0.377497	0.000755292	-0.0705146	0.517865	-0.579405	5.95555e-10	-0.272423	0.0141919	0.306982	0.00401368
ENSG00000068654	POLR1A	polymerase (RNA) I polypeptide A, 194kDa [Source:HGNC Symbol;Acc:HGNC:17264]	protein_coding	1.47413e-34	-1.23855	1.28944e-20	-0.409738	0.0270613	-1.59444	2.51177e-28	0.828817	1.48508e-08	-0.355884	0.0504983	-1.1847	5.98922e-14
ENSG00000068697	LAPTM4A	lysosomal protein transmembrane 4 alpha [Source:HGNC Symbol;Acc:HGNC:6924]	protein_coding	6.72969e-31	0.834492	1.42462e-20	0.0587479	0.737382	0.832513	1.52232e-17	-0.775744	1.8875e-15	-0.00197928	0.991608	0.773765	2.97344e-13
ENSG00000068724	TTC7A	tetratricopeptide repeat domain 7A [Source:HGNC Symbol;Acc:HGNC:19750]	protein_coding	6.2104e-15	0.516538	2.14429e-11	-0.0447543	0.767918	0.342236	6.8931e-05	-0.561293	1.97975e-11	-0.174302	0.0982959	0.386991	3.23372e-05
ENSG00000068745	IP6K2	inositol hexakisphosphate kinase 2 [Source:HGNC Symbol;Acc:HGNC:17313]	protein_coding	0.000165431	0.185288	0.0906533	0.394926	0.00357731	0.425666	0.000178375	0.209638	0.0763872	0.240379	0.082571	0.0307406	0.845991
ENSG00000068784	SRBD1	S1 RNA binding domain 1 [Source:HGNC Symbol;Acc:HGNC:25521]	protein_coding	1.45202e-11	-0.58488	1.12021e-05	-0.0730809	0.771492	-0.905195	3.51324e-10	0.511799	0.000448834	-0.320315	0.0807652	-0.832114	1.12765e-07
ENSG00000068796	KIF2A	kinesin heavy chain member 2A [Source:HGNC Symbol;Acc:HGNC:6318]	protein_coding	2.64929e-08	-0.343808	5.95013e-05	-0.340554	0.00196475	-0.522144	1.48891e-08	0.0032535	0.978371	-0.178336	0.132662	-0.18159	0.0976233
ENSG00000068831	RASGRP2	RAS guanyl releasing protein 2 (calcium and DAG-regulated) [Source:HGNC Symbol;Acc:HGNC:9879]	protein_coding	3.07159e-33	4.81667	4.63873e-20	1.05837	0.247995	4.39053	1.5264e-15	-3.7583	6.21527e-15	-0.426137	0.420636	3.33216	9.78604e-11
ENSG00000068878	PSME4	proteasome (prosome, macropain) activator subunit 4 [Source:HGNC Symbol;Acc:HGNC:20635]	protein_coding	4.08917e-06	-0.111541	0.24788	-0.247625	0.04595	-0.482467	6.17552e-07	-0.136085	0.193217	-0.370927	0.000649431	-0.234842	0.0352856
ENSG00000068885	IFT80	intraflagellar transport 80 [Source:HGNC Symbol;Acc:HGNC:29262]	protein_coding	8.55141e-10	-0.842838	7.67016e-09	0.0745639	0.793641	-0.342518	0.0412038	0.917402	6.14407e-09	0.50032	0.00710806	-0.417082	0.0215683
ENSG00000068903	SIRT2	sirtuin 2 [Source:HGNC Symbol;Acc:HGNC:10886]	protein_coding	5.365e-77	1.24078	1.92229e-59	0.366176	0.000309273	1.18616	3.56736e-47	-0.874605	1.49928e-26	-0.054621	0.665159	0.819984	1.88251e-20
ENSG00000068912	ERLEC1	endoplasmic reticulum lectin 1 [Source:HGNC Symbol;Acc:HGNC:25222]	protein_coding	9.77866e-08	0.478188	1.47038e-05	-0.0397503	0.860278	0.455618	0.00017395	-0.517938	1.56323e-05	-0.0225692	0.912899	0.495369	0.000170975
ENSG00000068971	PPP2R5B	protein phosphatase 2, regulatory subunit B', beta [Source:HGNC Symbol;Acc:HGNC:9310]	protein_coding	9.93255e-37	1.46414	3.14398e-26	-0.0581976	0.841215	1.12037	1.45347e-13	-1.52234	3.4454e-24	-0.343768	0.0661867	1.17857	7.19536e-13
ENSG00000068976	PYGM	phosphorylase, glycogen, muscle [Source:HGNC Symbol;Acc:HGNC:9726]	protein_coding	0.382649	-0.481761	0.282484	-0.706758	0.267816	-0.206687	0.691662	-0.224996	0.67798	0.275074	0.693187	0.50007	0.372718
ENSG00000069011	PITX1	paired-like homeodomain 1 [Source:HGNC Symbol;Acc:HGNC:9004]	protein_coding	6.97104e-09	0.600014	1.55741e-07	-0.0604597	0.789077	0.267194	0.0437175	-0.660473	1.02584e-07	-0.332819	0.0251225	0.327654	0.0224373
ENSG00000069020	MAST4	microtubule associated serine/threonine kinase family member 4 [Source:HGNC Symbol;Acc:HGNC:19037]	protein_coding	8.8212e-09	-1.40898	4.06518e-06	-0.859248	0.0328094	-1.85557	6.07123e-08	0.549733	0.127732	-0.44659	0.365962	-0.996322	0.0115146
ENSG00000069248	NUP133	nucleoporin 133kDa [Source:HGNC Symbol;Acc:HGNC:18016]	protein_coding	1.89832e-17	-0.774687	1.25405e-16	-0.229857	0.0858958	-0.580979	1.27589e-08	0.54483	1.17945e-07	0.193708	0.14662	-0.351123	0.00225452
ENSG00000069275	NUCKS1	nuclear casein kinase and cyclin-dependent kinase substrate 1 [Source:HGNC Symbol;Acc:HGNC:29923]	protein_coding	7.5752e-43	-1.7062	2.05368e-34	-0.204036	0.381478	-1.39534	4.4717e-20	1.50216	3.65424e-23	0.310855	0.112774	-1.19131	6.15871e-13
ENSG00000069329	VPS35	vacuolar protein sorting 35 homolog (S. cerevisiae) [Source:HGNC Symbol;Acc:HGNC:13487]	protein_coding	3.83656e-05	-0.30344	8.54361e-06	-0.146017	0.14319	-0.24394	0.00124116	0.157423	0.0422806	0.0594999	0.585494	-0.0979232	0.279673
ENSG00000069345	DNAJA2	DnaJ (Hsp40) homolog, subfamily A, member 2 [Source:HGNC Symbol;Acc:HGNC:14884]	protein_coding	0.000510193	0.077901	0.408415	-0.270572	0.019196	-0.158541	0.110633	-0.348473	0.000184466	-0.236442	0.0329651	0.112032	0.329292
ENSG00000069399	BCL3	B-cell CLL/lymphoma 3 [Source:HGNC Symbol;Acc:HGNC:998]	protein_coding	0.0420916	0.368186	0.0172113	-0.00167613	0.99705	0.0835959	0.6662	-0.369863	0.0286922	-0.28459	0.172048	0.0852721	0.699509
ENSG00000069424	KCNAB2	potassium channel, voltage gated subfamily A regulatory beta subunit 2 [Source:HGNC Symbol;Acc:HGNC:6229]	protein_coding	0.000135307	0.352641	0.370472	0.867645	0.0809489	1.52865	5.24193e-05	0.515004	0.208141	1.17601	0.00653962	0.661009	0.128858
ENSG00000069493	CLEC2D	C-type lectin domain family 2, member D [Source:HGNC Symbol;Acc:HGNC:14351]	protein_coding	0.162686	-0.475312	0.338062	0.19325	0.818958	0.564722	0.262088	0.668561	0.199329	1.04003	0.0777686	0.371472	0.525249
ENSG00000069509	FUNDC1	FUN14 domain containing 1 [Source:HGNC Symbol;Acc:HGNC:28746]	protein_coding	4.04999e-12	-0.506695	5.01655e-06	0.156665	0.372573	-0.561402	3.38253e-06	0.66336	2.12528e-08	-0.054707	0.781644	-0.718067	2.48208e-08
ENSG00000069535	MAOB	monoamine oxidase B [Source:HGNC Symbol;Acc:HGNC:6834]	protein_coding	1.35992e-18	-1.8421	2.61655e-15	-0.387462	0.297841	-1.70306	2.06826e-11	1.45463	1.15127e-08	0.139039	0.733248	-1.31559	2.52824e-06
ENSG00000069667	RORA	RAR-related orphan receptor A [Source:HGNC Symbol;Acc:HGNC:10258]	protein_coding	0.0662481	-1.05105	0.0561329	-1.34915	0.0705347	-0.567757	0.367065	-0.298098	0.666364	0.483298	0.564005	0.781396	0.266857
ENSG00000069702	TGFBR3	transforming growth factor, beta receptor III [Source:HGNC Symbol;Acc:HGNC:11774]	protein_coding	9.22376e-09	-1.08158	2.9687e-08	-0.652313	0.0129318	-1.00787	2.38261e-06	0.429266	0.0570662	0.0737069	0.837113	-0.355559	0.165115
ENSG00000069712	KIAA1107	KIAA1107 [Source:HGNC Symbol;Acc:HGNC:29192]	protein_coding	0.00409699	0.331196	0.18931	0.239429	0.555459	0.86147	0.000721417	-0.0917677	0.762558	0.530273	0.0863795	0.622041	0.0289935
ENSG00000069764	PLA2G10	phospholipase A2, group X [Source:HGNC Symbol;Acc:HGNC:9029]	protein_coding	7.95112e-11	1.48353	1.00518e-08	0.813678	0.0231762	1.80454	1.09039e-10	-0.669855	0.0219238	0.32101	0.403532	0.990864	0.00154812
ENSG00000069812	HES2	hes family bHLH transcription factor 2 [Source:HGNC Symbol;Acc:HGNC:16005]	protein_coding	0.0312555	0.105497	0.788449	0.0865565	0.899936	0.879111	0.0135762	-0.0189408	0.967496	0.773613	0.0693838	0.792554	0.0441849
ENSG00000069849	ATP1B3	ATPase, Na+/K+ transporting, beta 3 polypeptide [Source:HGNC Symbol;Acc:HGNC:806]	protein_coding	2.16157e-23	-0.851692	7.27367e-14	-0.320094	0.0470292	-1.13736	2.81868e-20	0.531597	2.53006e-05	-0.285664	0.0662076	-0.817262	1.56685e-09
ENSG00000069869	NEDD4	neural precursor cell expressed, developmentally down-regulated 4, E3 ubiquitin protein ligase [Source:HGNC Symbol;Acc:HGNC:7727]	protein_coding	0.00101962	0.318564	0.0161682	-0.0886806	0.714821	0.369668	0.0102636	-0.407245	0.00431717	0.0511041	0.82166	0.458349	0.00320161
ENSG00000069943	PIGB	phosphatidylinositol glycan anchor biosynthesis, class B [Source:HGNC Symbol;Acc:HGNC:8959]	protein_coding	0.035503	-0.3327	0.0261473	0.0321787	0.914229	-0.243809	0.147017	0.364879	0.0239033	0.0888916	0.71922	-0.275987	0.132001
ENSG00000069956	MAPK6	mitogen-activated protein kinase 6 [Source:HGNC Symbol;Acc:HGNC:6879]	protein_coding	1.97459e-23	0.494684	3.13746e-06	-0.57335	1.47656e-05	-0.363282	0.00237537	-1.06803	3.63996e-21	-0.857966	9.6489e-13	0.210068	0.130024
ENSG00000069966	GNB5	guanine nucleotide binding protein (G protein), beta 5 [Source:HGNC Symbol;Acc:HGNC:4401]	protein_coding	0.329915	0.140139	0.382584	-0.0965422	0.724723	-0.111423	0.544897	-0.236681	0.162563	-0.251561	0.22547	-0.0148808	0.947456
ENSG00000069974	RAB27A	RAB27A, member RAS oncogene family [Source:HGNC Symbol;Acc:HGNC:9766]	protein_coding	7.38233e-06	0.441577	0.000847901	0.16848	0.4397	0.649141	4.21427e-06	-0.273097	0.0665572	0.207564	0.262297	0.480661	0.00214103
ENSG00000069998	CECR5	cat eye syndrome chromosome region, candidate 5 [Source:HGNC Symbol;Acc:HGNC:1843]	protein_coding	1.44342e-07	-0.781062	9.2548e-08	-0.209652	0.37621	-0.593156	0.000242035	0.57141	0.000409621	0.187906	0.394774	-0.383504	0.0364039
ENSG00000070010	UFD1L	ubiquitin fusion degradation 1 like (yeast) [Source:HGNC Symbol;Acc:HGNC:12520]	protein_coding	0.072514	0.0356755	0.795064	0.0176894	0.945575	-0.265805	0.0462461	-0.0179861	0.909546	-0.30148	0.0490173	-0.283494	0.0521568
ENSG00000070018	LRP6	low density lipoprotein receptor-related protein 6 [Source:HGNC Symbol;Acc:HGNC:6698]	protein_coding	1.39451e-23	-1.10459	4.59841e-23	-0.114202	0.552599	-0.452235	0.000238185	0.99039	2.71228e-16	0.652358	1.22058e-06	-0.338033	0.0141739
ENSG00000070019	GUCY2C	guanylate cyclase 2C [Source:HGNC Symbol;Acc:HGNC:4688]	protein_coding	0.00755974	0.938455	0.139452	0.757075	0.448121	2.11965	0.00133526	-0.18138	0.817027	1.18119	0.14851	1.36257	0.0698749
ENSG00000070047	PHRF1	PHD and ring finger domains 1 [Source:HGNC Symbol;Acc:HGNC:24351]	protein_coding	0.369309	0.146152	0.180756	-0.0231324	0.915078	0.0304706	0.821935	-0.169284	0.152538	-0.115681	0.452028	0.053603	0.721727
ENSG00000070061	IKBKAP	inhibitor of kappa light polypeptide gene enhancer in B-cells, kinase complex-associated protein [Source:HGNC Symbol;Acc:HGNC:5959]	protein_coding	5.23331e-28	-1.0911	3.84508e-27	-0.205049	0.169191	-0.617262	1.81176e-08	0.886056	7.92911e-16	0.473843	0.000185105	-0.412213	0.000761787
ENSG00000070081	NUCB2	nucleobindin 2 [Source:HGNC Symbol;Acc:HGNC:8044]	protein_coding	0.0411136	0.396332	0.00887427	0.337739	0.115923	0.209909	0.233965	-0.0585929	0.760169	-0.186424	0.394535	-0.127831	0.537853
ENSG00000070087	PFN2	profilin 2 [Source:HGNC Symbol;Acc:HGNC:8882]	protein_coding	3.59064e-19	-1.26532	4.71873e-14	0.218758	0.408315	-0.690429	0.000151909	1.48408	1.09775e-16	0.574889	0.00872894	-0.909187	2.68557e-06
ENSG00000070159	PTPN3	protein tyrosine phosphatase, non-receptor type 3 [Source:HGNC Symbol;Acc:HGNC:9655]	protein_coding	2.0816e-15	0.493637	9.27967e-08	-0.310824	0.0140874	0.186218	0.0860846	-0.804462	5.60082e-16	-0.307419	0.00884243	0.497043	7.20723e-06
ENSG00000070182	SPTB	spectrin, beta, erythrocytic [Source:HGNC Symbol;Acc:HGNC:11274]	protein_coding	0.238415	0.993311	0.0780818	0.269308	0.798833	0.167759	0.817552	-0.724002	0.248289	-0.825552	0.285575	-0.101549	0.904849
ENSG00000070190	DAPP1	dual adaptor of phosphotyrosine and 3-phosphoinositides [Source:HGNC Symbol;Acc:HGNC:16500]	protein_coding	5.1705e-08	0.738736	7.02754e-07	0.062935	0.835996	0.63092	0.000122182	-0.675801	3.27112e-05	-0.107816	0.65986	0.567985	0.00165048
ENSG00000070214	SLC44A1	solute carrier family 44 (choline transporter), member 1 [Source:HGNC Symbol;Acc:HGNC:18798]	protein_coding	2.5415e-08	0.333796	0.00191136	0.000488133	0.998586	0.589496	2.57794e-07	-0.333308	0.00457375	0.2557	0.0692983	0.589007	2.25411e-06
ENSG00000070269	TMEM260	transmembrane protein 260 [Source:HGNC Symbol;Acc:HGNC:20185]	protein_coding	5.54281e-06	0.591734	0.000145318	0.369947	0.0970077	0.801809	1.65234e-06	-0.221787	0.222421	0.210075	0.350511	0.431862	0.0235273
ENSG00000070366	SMG6	SMG6 nonsense mediated mRNA decay factor [Source:HGNC Symbol;Acc:HGNC:17809]	protein_coding	0.0674639	0.225192	0.0362955	0.213213	0.161894	0.248305	0.0346607	-0.011979	0.933433	0.0231131	0.904841	0.0350922	0.822261
ENSG00000070367	EXOC5	exocyst complex component 5 [Source:HGNC Symbol;Acc:HGNC:10696]	protein_coding	0.0224345	-0.226056	0.128819	-0.46199	0.0144238	-0.225725	0.172128	-0.235934	0.148171	0.000331277	0.999372	0.236265	0.197237
ENSG00000070371	CLTCL1	clathrin, heavy chain-like 1 [Source:HGNC Symbol;Acc:HGNC:2093]	protein_coding	5.33684e-06	-0.520423	0.00177366	0.271163	0.25902	0.231903	0.211967	0.791586	5.57594e-06	0.752326	0.000109415	-0.0392601	0.868832
ENSG00000070404	FSTL3	follistatin-like 3 (secreted glycoprotein) [Source:HGNC Symbol;Acc:HGNC:3973]	protein_coding	0.244454	0.567692	0.408459	0.0759269	0.95866	1.19914	0.0958986	-0.491765	0.521587	0.631449	0.508346	1.12321	0.161871
ENSG00000070413	DGCR2	DiGeorge syndrome critical region gene 2 [Source:HGNC Symbol;Acc:HGNC:2845]	protein_coding	0.000120744	0.391316	3.24963e-05	0.128801	0.405704	0.307402	0.00342355	-0.262515	0.0125102	-0.0839136	0.572567	0.178601	0.141099
ENSG00000070423	RNF126	ring finger protein 126 [Source:HGNC Symbol;Acc:HGNC:21151]	protein_coding	8.01074e-13	0.690884	4.90352e-10	-0.0935468	0.650645	0.219696	0.0944751	-0.784431	7.16467e-11	-0.471188	0.000564026	0.313243	0.0258035
ENSG00000070444	MNT	MAX network transcriptional repressor [Source:HGNC Symbol;Acc:HGNC:7188]	protein_coding	2.14874e-07	0.495471	5.19439e-06	-0.00206054	0.994503	0.423976	0.000410558	-0.497532	2.66128e-05	-0.0714953	0.693318	0.426036	0.00115304
ENSG00000070476	ZXDC	ZXD family zinc finger C [Source:HGNC Symbol;Acc:HGNC:28160]	protein_coding	0.00122481	-0.0432514	0.656479	0.1393	0.283883	0.275387	0.00287359	0.182552	0.0551675	0.318638	0.00197711	0.136087	0.207728
ENSG00000070495	JMJD6	jumonji domain containing 6 [Source:HGNC Symbol;Acc:HGNC:19355]	protein_coding	0.000317281	0.454902	0.00360325	-0.199339	0.43877	0.24925	0.168939	-0.654241	9.5891e-05	-0.205652	0.359471	0.448589	0.0184386
ENSG00000070501	POLB	polymerase (DNA directed), beta [Source:HGNC Symbol;Acc:HGNC:9174]	protein_coding	0.000206627	-0.44104	0.000788647	-0.0630109	0.798946	-0.462444	0.00128346	0.378029	0.00884421	-0.0214041	0.93202	-0.399433	0.0119745
ENSG00000070526	ST6GALNAC1	ST6 (alpha-N-acetyl-neuraminyl-2,3-beta-galactosyl-1,3)-N-acetylgalactosaminide alpha-2,6-sialyltransferase 1 [Source:HGNC Symbol;Acc:HGNC:23614]	protein_coding	0.00604789	0.964224	0.00264667	0.326814	0.552539	0.933584	0.00848496	-0.63741	0.0777065	-0.0306398	0.959147	0.60677	0.135512
ENSG00000070540	WIPI1	WD repeat domain, phosphoinositide interacting 1 [Source:HGNC Symbol;Acc:HGNC:25471]	protein_coding	3.61731e-21	1.12258	1.96538e-17	0.336065	0.0841121	1.08671	3.58894e-14	-0.786513	4.79337e-08	-0.035865	0.884096	0.750648	1.86781e-06
ENSG00000070610	GBA2	glucosidase, beta (bile acid) 2 [Source:HGNC Symbol;Acc:HGNC:18986]	protein_coding	1.69272e-12	0.553038	1.37953e-10	0.0318454	0.858986	0.408812	1.87974e-05	-0.521192	2.81373e-08	-0.144225	0.245559	0.376967	0.000319451
ENSG00000070614	NDST1	N-deacetylase/N-sulfotransferase (heparan glucosaminyl) 1 [Source:HGNC Symbol;Acc:HGNC:7680]	protein_coding	1.57117e-41	1.31475	6.47249e-31	0.180308	0.34205	1.20431	2.26886e-22	-1.13444	4.30962e-20	-0.110436	0.5433	1.02401	2.74076e-14
ENSG00000070669	ASNS	asparagine synthetase (glutamine-hydrolyzing) [Source:HGNC Symbol;Acc:HGNC:753]	protein_coding	2.40812e-07	0.60928	1.24761e-05	-0.162539	0.496394	0.176425	0.295466	-0.77182	2.93438e-07	-0.432855	0.01494	0.338965	0.0544528
ENSG00000070718	AP3M2	adaptor-related protein complex 3, mu 2 subunit [Source:HGNC Symbol;Acc:HGNC:570]	protein_coding	9.34025e-62	-1.29526	4.98811e-35	-0.492302	0.000189603	-1.70932	1.00734e-49	0.802959	3.52138e-12	-0.414063	0.00331895	-1.21702	2.80218e-22
ENSG00000070731	ST6GALNAC2	ST6 (alpha-N-acetyl-neuraminyl-2,3-beta-galactosyl-1,3)-N-acetylgalactosaminide alpha-2,6-sialyltransferase 2 [Source:HGNC Symbol;Acc:HGNC:10867]	protein_coding	4.3167e-06	-0.175392	0.432593	0.361646	0.2319	0.825916	0.000123711	0.537038	0.0160518	1.00131	1.89544e-05	0.46427	0.0585733
ENSG00000070756	PABPC1	poly(A) binding protein, cytoplasmic 1 [Source:HGNC Symbol;Acc:HGNC:8554]	protein_coding	0.608459	-0.0633261	0.517358	-0.0371154	0.832059	-0.122831	0.236031	0.0262107	0.818749	-0.0595046	0.680676	-0.0857153	0.476433
ENSG00000070759	TESK2	testis-specific kinase 2 [Source:HGNC Symbol;Acc:HGNC:11732]	protein_coding	0.000382719	0.220017	0.343555	0.535269	0.0661994	0.868256	0.0001176	0.315252	0.194166	0.648239	0.0133167	0.332987	0.208152
ENSG00000070761	CFAP20	cilia and flagella associated protein 20 [Source:HGNC Symbol;Acc:HGNC:29523]	protein_coding	3.49762e-08	-0.638551	3.19629e-06	-0.187323	0.393714	-0.740621	6.91487e-07	0.451229	0.00304052	-0.10207	0.660582	-0.553299	0.000834435
ENSG00000070770	CSNK2A2	casein kinase 2, alpha prime polypeptide [Source:HGNC Symbol;Acc:HGNC:2459]	protein_coding	0.455811	-0.0521176	0.591933	-0.137498	0.306243	-0.0130807	0.909868	-0.0853807	0.409897	0.039037	0.792594	0.124418	0.269003
ENSG00000070778	PTPN21	protein tyrosine phosphatase, non-receptor type 21 [Source:HGNC Symbol;Acc:HGNC:9651]	protein_coding	2.65567e-50	1.12119	5.22852e-34	0.25692	0.0563801	1.2078	6.04409e-34	-0.864273	5.99866e-18	0.0866078	0.555753	0.950881	1.06933e-18
ENSG00000070785	EIF2B3	eukaryotic translation initiation factor 2B, subunit 3 gamma, 58kDa [Source:HGNC Symbol;Acc:HGNC:3259]	protein_coding	1.02426e-12	-0.883868	2.03474e-06	-0.081222	0.82313	-1.31544	9.77507e-11	0.802646	7.73401e-05	-0.431568	0.0994082	-1.23421	2.15875e-08
ENSG00000070814	TCOF1	Treacher Collins-Franceschetti syndrome 1 [Source:HGNC Symbol;Acc:HGNC:11654]	protein_coding	3.70206e-53	-1.72777	2.22424e-38	-0.41958	0.0224526	-1.74949	1.28651e-33	1.30819	2.3312e-19	-0.0217176	0.935042	-1.32991	3.29454e-17
ENSG00000070831	CDC42	cell division cycle 42 [Source:HGNC Symbol;Acc:HGNC:1736]	protein_coding	5.62461e-35	0.663669	4.28509e-22	-0.18396	0.0657299	0.213906	0.00695135	-0.84763	2.76315e-30	-0.449763	2.56378e-08	0.397866	1.67202e-06
ENSG00000070882	OSBPL3	oxysterol binding protein-like 3 [Source:HGNC Symbol;Acc:HGNC:16370]	protein_coding	3.43868e-30	0.700721	3.90999e-16	-0.330156	0.00463409	0.175281	0.0867912	-1.03088	9.97817e-29	-0.52544	2.33053e-07	0.505437	1.12026e-06
ENSG00000070950	RAD18	RAD18 E3 ubiquitin protein ligase [Source:HGNC Symbol;Acc:HGNC:18278]	protein_coding	1.64032e-33	-0.542313	3.5889e-10	-0.784053	4.24201e-15	-1.07985	1.14184e-30	-0.24174	0.0152882	-0.537532	2.6516e-07	-0.295792	0.00722917
ENSG00000070961	ATP2B1	ATPase, Ca++ transporting, plasma membrane 1 [Source:HGNC Symbol;Acc:HGNC:814]	protein_coding	0.0144382	0.214756	0.139166	-0.236827	0.265521	0.147402	0.375364	-0.451583	0.00278112	-0.0673539	0.775668	0.384229	0.0233112
ENSG00000071051	NCK2	NCK adaptor protein 2 [Source:HGNC Symbol;Acc:HGNC:7665]	protein_coding	1.19106e-35	1.53756	9.6501e-26	0.212012	0.393045	1.50734	3.13115e-21	-1.32555	9.38028e-17	-0.030219	0.914071	1.29533	7.71393e-14
ENSG00000071054	MAP4K4	mitogen-activated protein kinase kinase kinase kinase 4 [Source:HGNC Symbol;Acc:HGNC:6866]	protein_coding	5.9971e-14	0.710533	4.36124e-05	-0.486002	0.0449694	-0.525245	0.00719916	-1.19654	1.10497e-10	-1.23578	3.69783e-10	-0.0392425	0.883969
ENSG00000071073	MGAT4A	mannosyl (alpha-1,3-)-glycoprotein beta-1,4-N-acetylglucosaminyltransferase, isozyme A [Source:HGNC Symbol;Acc:HGNC:7047]	protein_coding	8.15935e-14	1.75954	7.87675e-09	0.987749	0.0187022	2.48932	2.56392e-14	-0.771787	0.0248678	0.729781	0.0704315	1.50157	3.15006e-05
ENSG00000071082	RPL31	ribosomal protein L31 [Source:HGNC Symbol;Acc:HGNC:10334]	protein_coding	1.07152e-11	-0.741371	7.25672e-11	-0.0658057	0.767617	-0.489556	0.000114473	0.675566	5.28068e-08	0.251815	0.108015	-0.42375	0.00248207
ENSG00000071127	WDR1	WD repeat domain 1 [Source:HGNC Symbol;Acc:HGNC:12754]	protein_coding	9.86186e-57	0.978306	1.56263e-37	-0.161893	0.170425	0.223511	0.0121775	-1.1402	2.52744e-43	-0.754796	5.5872e-18	0.385403	4.03034e-05
ENSG00000071189	SNX13	sorting nexin 13 [Source:HGNC Symbol;Acc:HGNC:21335]	protein_coding	0.139897	0.0953107	0.501119	-0.0637337	0.795614	0.245923	0.0927241	-0.159044	0.290094	0.150612	0.42545	0.309657	0.0501891
ENSG00000071205	ARHGAP10	Rho GTPase activating protein 10 [Source:HGNC Symbol;Acc:HGNC:26099]	protein_coding	2.27466e-06	0.449004	0.000723862	-0.236207	0.251104	0.316681	0.0345176	-0.685211	1.61425e-06	-0.132323	0.512714	0.552888	0.000482455
ENSG00000071242	RPS6KA2	ribosomal protein S6 kinase, 90kDa, polypeptide 2 [Source:HGNC Symbol;Acc:HGNC:10431]	protein_coding	2.23119e-05	1.00884	4.10161e-05	-0.0237556	0.96761	0.586085	0.0368997	-1.0326	0.000117006	-0.422758	0.221392	0.60984	0.0480965
ENSG00000071243	ING3	inhibitor of growth family, member 3 [Source:HGNC Symbol;Acc:HGNC:14587]	protein_coding	0.588769	0.0867995	0.632035	-0.14	0.620076	-0.0547567	0.792835	-0.2268	0.223403	-0.141556	0.573432	0.0852436	0.714247
ENSG00000071246	VASH1	vasohibin 1 [Source:HGNC Symbol;Acc:HGNC:19964]	protein_coding	0.000567399	-1.11489	0.0074688	0.567	0.328307	0.210389	0.658113	1.68189	9.05713e-05	1.32528	0.00872894	-0.356611	0.47777
ENSG00000071282	LMCD1	LIM and cysteine-rich domains 1 [Source:HGNC Symbol;Acc:HGNC:6633]	protein_coding	2.39626e-28	1.05949	4.09032e-19	-0.227576	0.22771	0.423085	0.0018227	-1.28707	1.39993e-23	-0.636409	7.82318e-06	0.650661	6.67215e-06
ENSG00000071462	WBSCR22	Williams Beuren syndrome chromosome region 22 [Source:HGNC Symbol;Acc:HGNC:16405]	protein_coding	7.0234e-05	-0.342017	0.00437697	-0.0992072	0.641049	-0.534261	3.37085e-05	0.242809	0.0710948	-0.192245	0.25482	-0.435054	0.00227824
ENSG00000071537	SEL1L	sel-1 suppressor of lin-12-like (C. elegans) [Source:HGNC Symbol;Acc:HGNC:10717]	protein_coding	0.00450373	0.275663	0.0711078	-0.134751	0.604219	0.373431	0.0236326	-0.410414	0.0115454	0.0977677	0.686603	0.508182	0.00406493
ENSG00000071539	TRIP13	thyroid hormone receptor interactor 13 [Source:HGNC Symbol;Acc:HGNC:12307]	protein_coding	1.14408e-111	-3.0717	1.73505e-79	-0.327983	0.152611	-2.85717	2.28111e-60	2.74372	1.43865e-55	0.214529	0.422311	-2.52919	7.86707e-42
ENSG00000071553	ATP6AP1	ATPase, H+ transporting, lysosomal accessory protein 1 [Source:HGNC Symbol;Acc:HGNC:868]	protein_coding	0.0564064	0.14331	0.123139	0.108503	0.461155	0.252399	0.0103225	-0.034807	0.759999	0.109089	0.400836	0.143896	0.208358
ENSG00000071564	TCF3	transcription factor 3 [Source:HGNC Symbol;Acc:HGNC:11633]	protein_coding	0.0853438	0.125075	0.45071	0.216933	0.369811	0.395552	0.0188231	0.0918573	0.624957	0.270476	0.193113	0.178619	0.375995
ENSG00000071575	TRIB2	tribbles pseudokinase 2 [Source:HGNC Symbol;Acc:HGNC:30809]	protein_coding	4.60785e-07	0.338258	0.108922	-0.819872	0.00160686	-0.396374	0.0880002	-1.15813	7.46869e-08	-0.734633	0.00298922	0.423497	0.098717
ENSG00000071626	DAZAP1	DAZ associated protein 1 [Source:HGNC Symbol;Acc:HGNC:2683]	protein_coding	6.30289e-19	-0.501742	3.30087e-07	0.0107177	0.962961	-0.838081	2.2586e-15	0.512459	1.58132e-06	-0.336339	0.00735425	-0.848799	1.12581e-13
ENSG00000071655	MBD3	methyl-CpG binding domain protein 3 [Source:HGNC Symbol;Acc:HGNC:6918]	protein_coding	4.99859e-19	-1.07143	5.39883e-13	0.0202806	0.952872	-0.999774	7.10951e-10	1.09171	1.19454e-11	0.0716516	0.786626	-1.02005	6.6186e-09
ENSG00000071794	HLTF	helicase-like transcription factor [Source:HGNC Symbol;Acc:HGNC:11099]	protein_coding	3.91065e-40	-1.95787	8.33116e-33	-0.305901	0.229293	-1.62854	6.18358e-20	1.65197	1.95639e-20	0.329333	0.165018	-1.32263	9.8891e-12
ENSG00000071859	FAM50A	family with sequence similarity 50, member A [Source:HGNC Symbol;Acc:HGNC:18786]	protein_coding	6.66441e-13	0.87094	2.48988e-13	0.279439	0.11432	0.602517	5.04772e-06	-0.591501	6.42428e-06	-0.268423	0.0996769	0.323077	0.0322769
ENSG00000071889	FAM3A	family with sequence similarity 3, member A [Source:HGNC Symbol;Acc:HGNC:13749]	protein_coding	1.45546e-29	0.973806	1.44924e-21	0.21083	0.181843	0.993648	3.06801e-19	-0.762977	7.28536e-12	0.0198413	0.918912	0.782818	9.83662e-11
ENSG00000071894	CPSF1	cleavage and polyadenylation specific factor 1, 160kDa [Source:HGNC Symbol;Acc:HGNC:2324]	protein_coding	0.522691	0.00747127	0.942514	0.118987	0.395558	0.00223042	0.984628	0.111516	0.273443	-0.00524084	0.973134	-0.116756	0.30786
ENSG00000071994	PDCD2	programmed cell death 2 [Source:HGNC Symbol;Acc:HGNC:8762]	protein_coding	2.30553e-08	-0.429762	3.29969e-06	-0.214125	0.107644	-0.542253	6.136e-08	0.215637	0.0405219	-0.112491	0.424216	-0.328127	0.00365625
ENSG00000072042	RDH11	retinol dehydrogenase 11 (all-trans/9-cis/11-cis) [Source:HGNC Symbol;Acc:HGNC:17964]	protein_coding	0.00694163	-0.188416	0.282735	-0.130298	0.658691	-0.596831	0.000827905	0.0581187	0.783038	-0.408415	0.0549183	-0.466533	0.0194874
ENSG00000072062	PRKACA	protein kinase, cAMP-dependent, catalytic, alpha [Source:HGNC Symbol;Acc:HGNC:9380]	protein_coding	0.0198885	0.237879	0.0108092	0.0337178	0.854657	0.207978	0.0452979	-0.204161	0.0475725	-0.0299013	0.856479	0.17426	0.135018
ENSG00000072071	LPHN1	latrophilin 1 [Source:HGNC Symbol;Acc:HGNC:20973]	protein_coding	0.1708	-0.391027	0.111508	-0.0220381	0.96761	0.126014	0.670058	0.368989	0.171816	0.517042	0.0975699	0.148052	0.656312
ENSG00000072110	ACTN1	actinin, alpha 1 [Source:HGNC Symbol;Acc:HGNC:163]	protein_coding	0.790014	0.0586403	0.583534	0.00252158	0.991543	-0.0411522	0.736272	-0.0561187	0.637076	-0.0997925	0.48616	-0.0436738	0.755562
ENSG00000072121	ZFYVE26	zinc finger, FYVE domain containing 26 [Source:HGNC Symbol;Acc:HGNC:20761]	protein_coding	2.03499e-06	0.245276	0.000945806	0.145308	0.185873	0.401562	3.52483e-07	-0.0999687	0.247389	0.156285	0.114724	0.256254	0.00373115
ENSG00000072133	RPS6KA6	ribosomal protein S6 kinase, 90kDa, polypeptide 6 [Source:HGNC Symbol;Acc:HGNC:10435]	protein_coding	0.0120099	-0.974312	0.0231461	-0.315138	0.666773	-1.30335	0.00582037	0.659174	0.173806	-0.329036	0.646906	-0.988209	0.0628321
ENSG00000072134	EPN2	epsin 2 [Source:HGNC Symbol;Acc:HGNC:18639]	protein_coding	4.96306e-07	0.354243	0.00355036	-0.363487	0.0270624	0.0137339	0.932767	-0.717731	2.3703e-08	-0.340509	0.0273628	0.377221	0.0106122
ENSG00000072135	PTPN18	protein tyrosine phosphatase, non-receptor type 18 (brain-derived) [Source:HGNC Symbol;Acc:HGNC:9649]	protein_coding	0.00291454	0.46803	0.000313791	0.207734	0.311601	0.310257	0.0351633	-0.260295	0.0778038	-0.157773	0.412062	0.102522	0.574966
ENSG00000072201	LNX1	ligand of numb-protein X 1, E3 ubiquitin protein ligase [Source:HGNC Symbol;Acc:HGNC:6657]	protein_coding	0.00033935	0.223385	0.239178	0.230487	0.42087	0.752445	5.92027e-05	0.00710233	0.976572	0.52906	0.0156777	0.521958	0.0126075
ENSG00000072210	ALDH3A2	aldehyde dehydrogenase 3 family, member A2 [Source:HGNC Symbol;Acc:HGNC:403]	protein_coding	2.68805e-31	-0.82583	1.06989e-15	-0.190931	0.236816	-1.18188	2.53001e-26	0.634899	1.84475e-08	-0.356053	0.00747091	-0.990952	2.61682e-16
ENSG00000072274	TFRC	transferrin receptor [Source:HGNC Symbol;Acc:HGNC:11763]	protein_coding	4.56934e-28	-1.87536	1.45021e-21	-0.765492	0.00383708	-1.97147	2.91057e-20	1.10987	3.23206e-07	-0.0961041	0.783944	-1.20597	3.49776e-07
ENSG00000072310	SREBF1	sterol regulatory element binding transcription factor 1 [Source:HGNC Symbol;Acc:HGNC:11289]	protein_coding	0.000494988	0.677261	0.00072865	0.0309094	0.944464	0.00107253	0.996874	-0.646352	0.00325001	-0.676189	0.00653136	-0.0298369	0.923174
ENSG00000072364	AFF4	AF4/FMR2 family, member 4 [Source:HGNC Symbol;Acc:HGNC:17869]	protein_coding	7.27054e-08	0.5432	0.000290517	-0.276589	0.22696	0.4894	0.00321451	-0.819789	3.18464e-07	-0.0538001	0.84142	0.765989	1.37914e-05
ENSG00000072401	UBE2D1	ubiquitin-conjugating enzyme E2D 1 [Source:HGNC Symbol;Acc:HGNC:12474]	protein_coding	6.42277e-06	0.369711	0.0291608	-0.539478	0.0165738	-0.103248	0.624228	-0.909189	3.6926e-07	-0.472959	0.0262155	0.436229	0.0364039
ENSG00000072415	MPP5	membrane protein, palmitoylated 5 (MAGUK p55 subfamily member 5) [Source:HGNC Symbol;Acc:HGNC:18669]	protein_coding	0.037876	-0.045502	0.721905	-0.177325	0.305598	0.176774	0.168458	-0.131823	0.313558	0.222276	0.13692	0.3541	0.00794442
ENSG00000072422	RHOBTB1	Rho-related BTB domain containing 1 [Source:HGNC Symbol;Acc:HGNC:18738]	protein_coding	1.24207e-113	1.89254	3.21557e-76	0.036804	0.868595	1.71425	7.59482e-54	-1.85573	1.17301e-62	-0.178288	0.225292	1.67744	1.26608e-44
ENSG00000072501	SMC1A	structural maintenance of chromosomes 1A [Source:HGNC Symbol;Acc:HGNC:11111]	protein_coding	3.96542e-37	-0.812094	3.12985e-20	-0.321048	0.00735984	-1.12968	2.00458e-32	0.491046	4.5586e-07	-0.317585	0.00521582	-0.808631	8.20623e-15
ENSG00000072506	HSD17B10	hydroxysteroid (17-beta) dehydrogenase 10 [Source:HGNC Symbol;Acc:HGNC:4800]	protein_coding	1.97436e-07	-0.477896	0.000865173	-0.00302848	0.993765	-0.742987	1.43841e-06	0.474867	0.00242967	-0.265091	0.182875	-0.739958	1.03042e-05
ENSG00000072518	MARK2	MAP/microtubule affinity-regulating kinase 2 [Source:HGNC Symbol;Acc:HGNC:3332]	protein_coding	6.90457e-72	1.07953	2.26241e-56	0.0394029	0.775122	0.653783	3.30823e-18	-1.04013	6.47294e-45	-0.425746	1.56807e-07	0.61438	4.82936e-14
ENSG00000072571	HMMR	hyaluronan-mediated motility receptor (RHAMM) [Source:HGNC Symbol;Acc:HGNC:5012]	protein_coding	4.77712e-40	-4.00849	2.87418e-32	-0.340603	0.570538	-3.89727	3.37566e-26	3.66789	1.70613e-23	0.111223	0.864954	-3.55667	3.64724e-19
ENSG00000072609	CHFR	checkpoint with forkhead and ring finger domains, E3 ubiquitin protein ligase [Source:HGNC Symbol;Acc:HGNC:20455]	protein_coding	6.82841e-39	1.0138	3.25626e-29	0.0829081	0.624849	0.839549	1.73028e-17	-0.930893	2.23799e-21	-0.174252	0.172638	0.756641	1.68202e-12
ENSG00000072657	TRHDE	thyrotropin-releasing hormone degrading enzyme [Source:HGNC Symbol;Acc:HGNC:30748]	protein_coding	0.275375	0.199151	0.215693	-0.102842	0.71483	0.0398306	0.842551	-0.301993	0.0775875	-0.15932	0.485655	0.142673	0.492758
ENSG00000072682	P4HA2	prolyl 4-hydroxylase, alpha polypeptide II [Source:HGNC Symbol;Acc:HGNC:8547]	protein_coding	0.73118	-0.0186706	0.933399	0.0293049	0.943097	0.18582	0.412973	0.0479756	0.844538	0.204491	0.466303	0.156515	0.548471
ENSG00000072736	NFATC3	nuclear factor of activated T-cells, cytoplasmic, calcineurin-dependent 3 [Source:HGNC Symbol;Acc:HGNC:7777]	protein_coding	0.0405837	-0.0812231	0.470575	-0.294982	0.0332554	-0.0368128	0.780473	-0.213759	0.0647514	0.0444103	0.802058	0.258169	0.0404845
ENSG00000072756	TRNT1	tRNA nucleotidyl transferase, CCA-adding, 1 [Source:HGNC Symbol;Acc:HGNC:17341]	protein_coding	6.78649e-35	-0.787035	4.5141e-22	-0.595218	4.0483e-10	-0.979431	2.37852e-28	0.191817	0.0458936	-0.192396	0.101345	-0.384214	0.000150666
ENSG00000072778	ACADVL	acyl-CoA dehydrogenase, very long chain [Source:HGNC Symbol;Acc:HGNC:92]	protein_coding	6.82068e-24	1.00313	5.59596e-18	0.145749	0.468463	0.950004	6.49742e-14	-0.857384	1.29825e-11	-0.0531291	0.798083	0.804255	6.39784e-09
ENSG00000072786	STK10	serine/threonine kinase 10 [Source:HGNC Symbol;Acc:HGNC:11388]	protein_coding	1.16636e-23	0.732376	1.87328e-12	-0.38191	0.00735984	0.207822	0.0926965	-1.11429	3.38461e-23	-0.524554	2.93643e-05	0.589731	2.76895e-06
ENSG00000072803	FBXW11	F-box and WD repeat domain containing 11 [Source:HGNC Symbol;Acc:HGNC:13607]	protein_coding	6.40569e-05	0.108986	0.304762	-0.371017	0.00380982	-0.0313824	0.807638	-0.480003	5.81285e-06	-0.140368	0.322804	0.339634	0.00432
ENSG00000072849	DERL2	derlin 2 [Source:HGNC Symbol;Acc:HGNC:17943]	protein_coding	3.52235e-06	0.342843	5.44437e-05	-0.0595846	0.709168	-0.0010414	0.992644	-0.402428	1.20778e-05	-0.343885	0.00096083	0.0585432	0.634957
ENSG00000072858	SIDT1	SID1 transmembrane family, member 1 [Source:HGNC Symbol;Acc:HGNC:25967]	protein_coding	2.10665e-05	1.01194	4.65948e-05	-0.0197056	0.973626	0.655776	0.0198795	-1.03164	0.000141451	-0.356162	0.318239	0.675481	0.0289935
ENSG00000072864	NDE1	nudE neurodevelopment protein 1 [Source:HGNC Symbol;Acc:HGNC:17619]	protein_coding	2.08874e-40	-0.982949	4.76348e-27	-0.422918	0.00031648	-1.15056	3.58934e-31	0.560031	2.86895e-08	-0.16761	0.212859	-0.727641	2.56669e-11
ENSG00000072954	TMEM38A	transmembrane protein 38A [Source:HGNC Symbol;Acc:HGNC:28462]	protein_coding	0.497668	-0.240103	0.171101	-0.0570644	0.862364	-0.132393	0.515044	0.183039	0.352578	0.10771	0.695956	-0.075329	0.756674
ENSG00000072958	AP1M1	adaptor-related protein complex 1, mu 1 subunit [Source:HGNC Symbol;Acc:HGNC:13667]	protein_coding	4.06472e-06	0.722032	5.69743e-06	0.0179453	0.962357	0.378332	0.0383973	-0.704086	5.05867e-05	-0.343699	0.111564	0.360387	0.0749246
ENSG00000073008	PVR	poliovirus receptor [Source:HGNC Symbol;Acc:HGNC:9705]	protein_coding	1.04503e-11	0.828302	1.06399e-06	-0.392599	0.115543	0.0191792	0.934221	-1.2209	2.09768e-11	-0.809123	7.05748e-05	0.411778	0.0560522
ENSG00000073050	XRCC1	X-ray repair complementing defective repair in Chinese hamster cells 1 [Source:HGNC Symbol;Acc:HGNC:12828]	protein_coding	4.53984e-08	-0.378398	0.000437733	0.254648	0.0894502	-0.235485	0.0533242	0.633047	2.51538e-08	0.142913	0.364741	-0.490134	9.37963e-05
ENSG00000073060	SCARB1	scavenger receptor class B, member 1 [Source:HGNC Symbol;Acc:HGNC:1664]	protein_coding	3.65905e-12	-0.471359	6.53588e-07	-0.0320331	0.869838	-0.613845	2.13676e-09	0.439326	2.19736e-05	-0.142485	0.30316	-0.581812	1.8899e-07
ENSG00000073067	CYP2W1	cytochrome P450, family 2, subfamily W, polypeptide 1 [Source:HGNC Symbol;Acc:HGNC:20243]	protein_coding	0.000147931	-0.165607	0.753422	1.58684	0.00376042	0.536393	0.301846	1.75245	0.0001713	0.702001	0.265608	-1.05045	0.0423315
ENSG00000073111	MCM2	minichromosome maintenance complex component 2 [Source:HGNC Symbol;Acc:HGNC:6944]	protein_coding	3.13521e-136	-3.99591	2.15057e-105	-0.141676	0.670817	-3.54177	7.06127e-73	3.85423	3.70972e-85	0.454145	0.0838845	-3.40009	5.47335e-59
ENSG00000073169		selenoprotein O [Source:EntrezGene;Acc:83642]	protein_coding	0.0109631	0.360906	0.0102244	0.0024798	0.994819	0.313486	0.0453393	-0.358426	0.0196578	-0.0474199	0.848138	0.311006	0.0717799
ENSG00000073282	TP63	tumor protein p63 [Source:HGNC Symbol;Acc:HGNC:15979]	protein_coding	0.0948645	-1.03174	0.148478	0.501984	0.668183	-0.881149	0.267062	1.53373	0.0402332	0.150594	0.906822	-1.38313	0.0979307
ENSG00000073331	ALPK1	alpha-kinase 1 [Source:HGNC Symbol;Acc:HGNC:20917]	protein_coding	5.32495e-11	0.116215	0.297498	0.406718	0.00182109	0.681189	2.42674e-10	0.290503	0.0100207	0.564974	1.50084e-06	0.274471	0.0265143
ENSG00000073350	LLGL2	lethal giant larvae homolog 2 (Drosophila) [Source:HGNC Symbol;Acc:HGNC:6629]	protein_coding	1.05265e-28	0.776547	1.4891e-25	0.375724	8.52245e-05	0.740604	5.435e-20	-0.400824	1.08966e-06	-0.0359436	0.78529	0.36488	5.60806e-05
ENSG00000073417	PDE8A	phosphodiesterase 8A [Source:HGNC Symbol;Acc:HGNC:8793]	protein_coding	0.141663	0.0988933	0.432377	0.0476686	0.833454	0.268688	0.0367343	-0.0512246	0.725789	0.169794	0.297323	0.221019	0.126419
ENSG00000073464	CLCN4	chloride channel, voltage-sensitive 4 [Source:HGNC Symbol;Acc:HGNC:2022]	protein_coding	0.00414585	0.726175	0.00294786	0.114268	0.810959	-0.010107	0.974532	-0.611906	0.0232885	-0.736282	0.0165449	-0.124375	0.728006
ENSG00000073536	NLE1	notchless homolog 1 (Drosophila) [Source:HGNC Symbol;Acc:HGNC:19889]	protein_coding	1.50681e-79	-2.23655	1.36306e-49	-0.304863	0.128034	-2.33195	2.4885e-45	1.93169	9.86862e-33	-0.095393	0.746971	-2.02708	1.34274e-30
ENSG00000073578	SDHA	succinate dehydrogenase complex, subunit A, flavoprotein (Fp) [Source:HGNC Symbol;Acc:HGNC:10680]	protein_coding	0.329117	-0.100021	0.310012	0.0344489	0.850338	-0.117011	0.279897	0.13447	0.204083	-0.0169902	0.92012	-0.15146	0.198089
ENSG00000073584	SMARCE1	SWI/SNF related, matrix associated, actin dependent regulator of chromatin, subfamily e, member 1 [Source:HGNC Symbol;Acc:HGNC:11109]	protein_coding	0.000312594	-0.245843	0.00346861	-0.0510814	0.743123	-0.323789	0.000371498	0.194762	0.0369887	-0.0779452	0.55102	-0.272707	0.00682476
ENSG00000073605	GSDMB	gasdermin B [Source:HGNC Symbol;Acc:HGNC:23690]	protein_coding	0.00242573	0.597967	0.0017956	0.490172	0.0659913	0.678573	0.00117438	-0.107795	0.653443	0.0806056	0.80714	0.188401	0.469439
ENSG00000073614	KDM5A	lysine (K)-specific demethylase 5A [Source:HGNC Symbol;Acc:HGNC:9886]	protein_coding	0.037941	0.162446	0.156381	-0.0760236	0.705751	0.225702	0.0676322	-0.23847	0.0508322	0.0632559	0.727581	0.301726	0.0231663
ENSG00000073670	ADAM11	ADAM metallopeptidase domain 11 [Source:HGNC Symbol;Acc:HGNC:189]	protein_coding	0.0302322	-0.324152	0.617779	0.786657	0.357712	1.18328	0.0499799	1.11081	0.0757371	1.50743	0.0324401	0.396623	0.586602
ENSG00000073711	PPP2R3A	protein phosphatase 2, regulatory subunit B'', alpha [Source:HGNC Symbol;Acc:HGNC:9307]	protein_coding	0.012553	-0.0796517	0.672163	0.181754	0.503582	0.438286	0.0147394	0.261406	0.1641	0.517938	0.0108801	0.256532	0.216677
ENSG00000073712	FERMT2	fermitin family member 2 [Source:HGNC Symbol;Acc:HGNC:15767]	protein_coding	0.00128842	0.691595	0.00932009	-0.320584	0.477337	0.446444	0.143226	-1.01218	0.00045975	-0.245151	0.540626	0.767028	0.0185187
ENSG00000073734	ABCB11	ATP-binding cassette, sub-family B (MDR/TAP), member 11 [Source:HGNC Symbol;Acc:HGNC:42]	protein_coding	1.24959e-13	1.19484	9.52404e-12	0.399107	0.132704	1.15438	1.12057e-09	-0.795737	2.70631e-05	-0.0404676	0.899007	0.755269	0.000267208
ENSG00000073737	DHRS9	dehydrogenase/reductase (SDR family) member 9 [Source:HGNC Symbol;Acc:HGNC:16888]	protein_coding	4.92004e-45	1.7281	1.74521e-26	-0.495329	0.0317545	1.27527	8.42083e-13	-2.22343	6.15796e-37	-0.452828	0.0370616	1.7706	1.53494e-20
ENSG00000073756	PTGS2	prostaglandin-endoperoxide synthase 2 (prostaglandin G/H synthase and cyclooxygenase) [Source:HGNC Symbol;Acc:HGNC:9605]	protein_coding	0.00487124	-0.979649	0.101259	-0.789409	0.383762	-2.36443	0.000518836	0.19024	0.800012	-1.38478	0.105345	-1.57502	0.0412035
ENSG00000073792	IGF2BP2	insulin-like growth factor 2 mRNA binding protein 2 [Source:HGNC Symbol;Acc:HGNC:28867]	protein_coding	2.76613e-52	1.00677	4.55744e-35	-0.0804826	0.591188	0.768769	6.82295e-18	-1.08726	7.32069e-35	-0.238005	0.0277076	0.849251	1.03393e-18
ENSG00000073803	MAP3K13	mitogen-activated protein kinase kinase kinase 13 [Source:HGNC Symbol;Acc:HGNC:6852]	protein_coding	1.7181e-12	0.611507	1.48085e-11	0.125551	0.409756	0.4741	2.12241e-06	-0.485956	9.61262e-07	-0.137407	0.299505	0.348549	0.00170641
ENSG00000073849	ST6GAL1	ST6 beta-galactosamide alpha-2,6-sialyltranferase 1 [Source:HGNC Symbol;Acc:HGNC:10860]	protein_coding	1.26841e-08	-0.683504	0.135315	1.76417	0.000499157	1.13178	0.0125963	2.44768	3.4627e-08	1.81529	0.000320395	-0.632393	0.216834
ENSG00000073905	VDAC1P1	voltage-dependent anion channel 1 pseudogene 1 [Source:HGNC Symbol;Acc:HGNC:12671]	processed_pseudogene	0.729049	-0.5721	0.376012	-0.338357	0.754588	0.00462579	0.995309	0.233743	0.760969	0.576726	0.5261	0.342983	0.680939
ENSG00000073910	FRY	furry homolog (Drosophila) [Source:HGNC Symbol;Acc:HGNC:20367]	protein_coding	2.14845e-06	-0.0797875	0.786431	0.555447	0.119787	1.122	2.46672e-05	0.635234	0.0220167	1.20179	3.72491e-05	0.566551	0.0631103
ENSG00000073921	PICALM	phosphatidylinositol binding clathrin assembly protein [Source:HGNC Symbol;Acc:HGNC:15514]	protein_coding	5.14188e-13	0.596501	1.33182e-07	-0.246809	0.143069	0.394971	0.00186033	-0.84331	4.07405e-12	-0.201531	0.208267	0.641779	1.78529e-06
ENSG00000073969	NSF	N-ethylmaleimide-sensitive factor [Source:HGNC Symbol;Acc:HGNC:8016]	protein_coding	6.23965e-06	0.244255	0.000621178	-0.059487	0.642827	0.239805	0.00219587	-0.303742	7.99061e-05	-0.00445082	0.972576	0.299292	0.000388711
ENSG00000074047	GLI2	GLI family zinc finger 2 [Source:HGNC Symbol;Acc:HGNC:4318]	protein_coding	0.0040498	-0.663403	0.0113984	-0.124662	0.802056	-0.831482	0.00358532	0.53874	0.0645045	-0.16808	0.696131	-0.70682	0.0259906
ENSG00000074054	CLASP1	cytoplasmic linker associated protein 1 [Source:HGNC Symbol;Acc:HGNC:17088]	protein_coding	0.0167163	0.172624	0.0323707	-0.0689603	0.622042	-0.0128137	0.903563	-0.241584	0.00510671	-0.185438	0.0746252	0.0561466	0.615592
ENSG00000074071	MRPS34	mitochondrial ribosomal protein S34 [Source:HGNC Symbol;Acc:HGNC:16618]	protein_coding	8.80535e-09	-0.552501	5.2807e-05	0.071448	0.786023	-0.671416	6.16773e-06	0.623949	2.45602e-05	-0.118915	0.585402	-0.742864	3.71612e-06
ENSG00000074181	NOTCH3	notch 3 [Source:HGNC Symbol;Acc:HGNC:7883]	protein_coding	5.88116e-30	-1.89334	1.64176e-28	0.00773058	0.985567	-0.479206	0.0110458	1.90107	4.2367e-25	1.41413	8.64729e-13	-0.486937	0.0184665
ENSG00000074201	CLNS1A	chloride channel, nucleotide-sensitive, 1A [Source:HGNC Symbol;Acc:HGNC:2080]	protein_coding	1.15155e-14	-0.616565	4.95091e-13	-0.126051	0.366767	-0.499923	9.06063e-08	0.490515	1.52152e-07	0.116642	0.36462	-0.373872	0.00031303
ENSG00000074211	PPP2R2C	protein phosphatase 2, regulatory subunit B, gamma [Source:HGNC Symbol;Acc:HGNC:9306]	protein_coding	0.00545605	0.477361	0.333678	-1.21892	0.0550059	-0.526671	0.335794	-1.69628	0.000622061	-1.00403	0.0983989	0.692247	0.245836
ENSG00000074266	EED	embryonic ectoderm development [Source:HGNC Symbol;Acc:HGNC:3188]	protein_coding	1.26093e-14	-0.800277	1.1098e-14	-0.147442	0.375125	-0.454066	6.59187e-05	0.652836	7.60321e-09	0.346211	0.0105074	-0.306624	0.0168788
ENSG00000074276	CDHR2	cadherin-related family member 2 [Source:HGNC Symbol;Acc:HGNC:18231]	protein_coding	7.61828e-35	1.43577	3.95155e-25	0.110791	0.674519	1.32286	2.16251e-18	-1.32497	1.48559e-18	-0.112908	0.623652	1.21207	1.61996e-13
ENSG00000074319	TSG101	tumor susceptibility 101 [Source:HGNC Symbol;Acc:HGNC:15971]	protein_coding	2.41747e-18	0.62457	1.10439e-13	-0.095444	0.519556	0.256412	0.00796331	-0.720014	2.70269e-15	-0.368158	0.000376803	0.351856	0.000667193
ENSG00000074356	C17orf85	chromosome 17 open reading frame 85 [Source:HGNC Symbol;Acc:HGNC:24612]	protein_coding	0.0219533	0.165438	0.0514875	-0.0949155	0.491951	0.0545632	0.596898	-0.260354	0.00387331	-0.110875	0.352421	0.149479	0.155472
ENSG00000074370	ATP2A3	ATPase, Ca++ transporting, ubiquitous [Source:HGNC Symbol;Acc:HGNC:813]	protein_coding	3.36979e-22	1.29973	8.22688e-14	0.0166346	0.968621	1.40433	1.1567e-13	-1.2831	1.21104e-11	0.104599	0.727202	1.3877	1.40428e-11
ENSG00000074410	CA12	carbonic anhydrase XII [Source:HGNC Symbol;Acc:HGNC:1371]	protein_coding	1.15769e-05	-0.911554	8.39994e-06	-0.245399	0.480087	-0.763809	0.000762994	0.666155	0.00336366	0.147745	0.6626	-0.51841	0.0435897
ENSG00000074416	MGLL	monoglyceride lipase [Source:HGNC Symbol;Acc:HGNC:17038]	protein_coding	5.37237e-45	1.72834	4.86925e-33	0.0376262	0.905996	1.41911	2.39204e-19	-1.69072	3.52595e-27	-0.309234	0.127468	1.38148	6.13606e-16
ENSG00000074527	NTN4	netrin 4 [Source:HGNC Symbol;Acc:HGNC:13658]	protein_coding	2.5081e-139	2.26606	5.47993e-103	0.0693903	0.742254	1.7854	5.82964e-55	-2.19667	7.77451e-83	-0.48066	0.000215342	1.71601	4.48548e-44
ENSG00000074582	BCS1L	BC1 (ubiquinol-cytochrome c reductase) synthesis-like [Source:HGNC Symbol;Acc:HGNC:1020]	protein_coding	5.77322e-57	-1.63798	1.0252e-41	-0.0418307	0.862305	-1.2822	4.85042e-23	1.59615	1.4137e-34	0.355784	0.0331737	-1.24037	6.06806e-19
ENSG00000074590	NUAK1	NUAK family, SNF1-like kinase, 1 [Source:HGNC Symbol;Acc:HGNC:14311]	protein_coding	3.63969e-06	0.461033	0.000650122	-0.204326	0.348225	0.355053	0.0188298	-0.665359	5.01144e-06	-0.10598	0.621724	0.559379	0.000515825
ENSG00000074603	DPP8	dipeptidyl-peptidase 8 [Source:HGNC Symbol;Acc:HGNC:16490]	protein_coding	0.00193676	0.222611	0.0833077	-0.209523	0.272836	0.243974	0.0838858	-0.432134	0.00133497	0.021363	0.925806	0.453497	0.00211909
ENSG00000074621	SLC24A1	solute carrier family 24 (sodium/potassium/calcium exchanger), member 1 [Source:HGNC Symbol;Acc:HGNC:10975]	protein_coding	0.00733825	-0.384867	0.0257503	0.189598	0.496319	0.065098	0.762305	0.574465	0.00166361	0.449965	0.0381993	-0.1245	0.594338
ENSG00000074657	ZNF532	zinc finger protein 532 [Source:HGNC Symbol;Acc:HGNC:30940]	protein_coding	1.66904e-08	-1.90902	7.495e-09	-0.442084	0.425251	-1.40821	0.000123711	1.46694	5.60076e-05	0.500809	0.300021	-0.966126	0.0195403
ENSG00000074660	SCARF1	scavenger receptor class F, member 1 [Source:HGNC Symbol;Acc:HGNC:16820]	protein_coding	9.77256e-15	0.881443	0.00158772	0.775961	0.0382115	2.14285	1.07024e-14	-0.105482	0.758043	1.26141	2.55978e-05	1.36689	3.85431e-06
ENSG00000074695	LMAN1	lectin, mannose-binding, 1 [Source:HGNC Symbol;Acc:HGNC:6631]	protein_coding	0.0152953	-0.396695	0.00404029	-0.0238558	0.935861	-0.112077	0.506858	0.372839	0.013819	0.284618	0.122586	-0.0882214	0.653485
ENSG00000074696	PTPLAD1	protein tyrosine phosphatase-like A domain containing 1 [Source:HGNC Symbol;Acc:HGNC:24175]	protein_coding	3.18818e-71	-1.42547	1.16663e-50	-0.218103	0.122245	-1.35335	2.78201e-39	1.20737	1.53702e-31	0.0721207	0.6626	-1.13525	2.91556e-24
ENSG00000074755	ZZEF1	zinc finger, ZZ-type with EF-hand domain 1 [Source:HGNC Symbol;Acc:HGNC:29027]	protein_coding	5.57488e-19	0.683365	1.10737e-12	0.195461	0.184935	0.813094	5.10029e-15	-0.487904	3.87217e-06	0.129729	0.364464	0.617633	6.03763e-08
ENSG00000074800	ENO1	enolase 1, (alpha) [Source:HGNC Symbol;Acc:HGNC:3350]	protein_coding	0.000395036	-1.0697	0.00193906	-0.436432	0.443124	-1.3799	0.000226379	0.633269	0.106149	-0.310196	0.562719	-0.943465	0.0255674
ENSG00000074842	MYDGF	myeloid-derived growth factor [Source:HGNC Symbol;Acc:HGNC:16948]	protein_coding	2.15446e-09	0.571323	3.42508e-09	0.0980773	0.569163	0.121737	0.304162	-0.473245	8.01366e-06	-0.449586	0.000127608	0.0236593	0.875671
ENSG00000074855	ANO8	anoctamin 8 [Source:HGNC Symbol;Acc:HGNC:29329]	protein_coding	7.24724e-19	1.11418	4.67919e-17	0.246867	0.240291	0.873043	2.18087e-09	-0.867318	2.25431e-09	-0.241142	0.203569	0.626176	0.000105848
ENSG00000074935	TUBE1	tubulin, epsilon 1 [Source:HGNC Symbol;Acc:HGNC:20775]	protein_coding	0.39977	0.119471	0.444324	0.141236	0.552598	-0.0917192	0.60935	0.0217641	0.908461	-0.211191	0.306118	-0.232955	0.200011
ENSG00000074964	ARHGEF10L	Rho guanine nucleotide exchange factor (GEF) 10-like [Source:HGNC Symbol;Acc:HGNC:25540]	protein_coding	2.72021e-08	-0.00353824	0.977883	0.523899	6.0506e-05	0.423535	0.00025355	0.527437	3.55109e-06	0.427073	0.000904764	-0.100364	0.490942
ENSG00000074966	TXK	TXK tyrosine kinase [Source:HGNC Symbol;Acc:HGNC:12434]	protein_coding	1.56541e-19	1.83987	1.80266e-15	0.107337	0.831056	1.39075	4.76355e-08	-1.73253	4.96056e-12	-0.449117	0.139408	1.28341	3.78088e-06
ENSG00000075089	ACTR6	ARP6 actin-related protein 6 homolog (yeast) [Source:HGNC Symbol;Acc:HGNC:24025]	protein_coding	0.00386084	-0.239461	0.108838	-0.317268	0.12071	-0.543049	0.000526585	-0.0778069	0.667667	-0.303588	0.119735	-0.225781	0.227357
ENSG00000075131	TIPIN	TIMELESS interacting protein [Source:HGNC Symbol;Acc:HGNC:30750]	protein_coding	1.18039e-66	-2.59252	3.73034e-34	-0.314272	0.269963	-3.41776	2.47013e-39	2.27825	1.17006e-23	-0.825235	0.0182798	-3.10349	8.99224e-30
ENSG00000075142	SRI	sorcin [Source:HGNC Symbol;Acc:HGNC:11292]	protein_coding	3.41615e-33	1.31928	3.50505e-24	0.155837	0.495608	1.24805	1.24609e-18	-1.16344	2.00035e-16	-0.0712251	0.754563	1.09222	1.39036e-12
ENSG00000075151	EIF4G3	eukaryotic translation initiation factor 4 gamma, 3 [Source:HGNC Symbol;Acc:HGNC:3298]	protein_coding	0.00328524	-0.976049	0.000697855	-0.112052	0.843339	-0.521839	0.113704	0.863997	0.00630469	0.454211	0.268055	-0.409786	0.274626
ENSG00000075188	NUP37	nucleoporin 37kDa [Source:HGNC Symbol;Acc:HGNC:29929]	protein_coding	9.15143e-40	-1.15771	1.12852e-30	-0.213918	0.152911	-1.0319	3.09562e-21	0.943792	6.38633e-18	0.125808	0.426427	-0.817984	6.32108e-12
ENSG00000075213	SEMA3A	sema domain, immunoglobulin domain (Ig), short basic domain, secreted, (semaphorin) 3A [Source:HGNC Symbol;Acc:HGNC:10723]	protein_coding	1.02528e-16	0.132449	0.330278	-0.696105	4.69545e-06	-0.808024	1.68713e-09	-0.828555	4.89041e-10	-0.940474	2.49252e-11	-0.111919	0.524033
ENSG00000075218	GTSE1	G-2 and S-phase expressed 1 [Source:HGNC Symbol;Acc:HGNC:13698]	protein_coding	1.26233e-15	-4.03222	2.2536e-13	-0.261747	0.811823	-3.96003	4.0995e-11	3.77047	2.84168e-10	0.0721855	0.94732	-3.69829	1.45511e-08
ENSG00000075223	SEMA3C	sema domain, immunoglobulin domain (Ig), short basic domain, secreted, (semaphorin) 3C [Source:HGNC Symbol;Acc:HGNC:10725]	protein_coding	7.52676e-08	0.400347	0.0254207	-0.699799	0.00188632	0.217352	0.297478	-1.10015	3.00414e-09	-0.182995	0.488807	0.917151	7.35929e-06
ENSG00000075234	TTC38	tetratricopeptide repeat domain 38 [Source:HGNC Symbol;Acc:HGNC:26082]	protein_coding	0.2293	0.242131	0.0723917	0.10792	0.642475	0.215526	0.152483	-0.134212	0.386493	-0.0266053	0.911596	0.107606	0.550839
ENSG00000075239	ACAT1	acetyl-CoA acetyltransferase 1 [Source:HGNC Symbol;Acc:HGNC:93]	protein_coding	6.89349e-35	-1.62964	1.22168e-26	-0.121467	0.665744	-1.36496	1.69159e-16	1.50817	6.97971e-20	0.264684	0.242374	-1.24349	4.56482e-12
ENSG00000075240	GRAMD4	GRAM domain containing 4 [Source:HGNC Symbol;Acc:HGNC:29113]	protein_coding	3.59913e-25	1.07685	3.28387e-17	-0.224701	0.276925	0.436358	0.00282851	-1.30155	4.94485e-21	-0.640492	3.45981e-05	0.661058	2.1768e-05
ENSG00000075275	CELSR1	cadherin, EGF LAG seven-pass G-type receptor 1 [Source:HGNC Symbol;Acc:HGNC:1850]	protein_coding	0.189994	0.181538	0.20723	-0.122358	0.60988	0.00712521	0.968541	-0.303895	0.0453557	-0.174412	0.376673	0.129483	0.486264
ENSG00000075292	ZNF638	zinc finger protein 638 [Source:HGNC Symbol;Acc:HGNC:17894]	protein_coding	0.286709	0.111014	0.31612	0.0444348	0.826214	0.198645	0.0908309	-0.0665796	0.600412	0.0876307	0.585402	0.15421	0.247132
ENSG00000075303	SLC25A40	solute carrier family 25, member 40 [Source:HGNC Symbol;Acc:HGNC:29680]	protein_coding	3.70004e-07	-0.793916	3.45553e-07	-0.36476	0.103271	-0.703345	3.92322e-05	0.429156	0.0148425	0.0905707	0.736946	-0.338585	0.0894333
ENSG00000075336	TIMM21	translocase of inner mitochondrial membrane 21 homolog (yeast) [Source:HGNC Symbol;Acc:HGNC:25010]	protein_coding	2.38961e-23	-0.931964	3.48747e-15	-0.161911	0.387575	-1.03763	8.23598e-16	0.770053	2.28391e-09	-0.105669	0.602991	-0.875722	4.11891e-10
ENSG00000075391	RASAL2	RAS protein activator like 2 [Source:HGNC Symbol;Acc:HGNC:9874]	protein_coding	8.77393e-13	0.914527	6.91683e-09	-0.201924	0.453791	0.603898	0.000635963	-1.11645	6.27607e-11	-0.310629	0.158423	0.805822	2.1563e-05
ENSG00000075399	VPS9D1	VPS9 domain containing 1 [Source:HGNC Symbol;Acc:HGNC:13526]	protein_coding	1.6112e-56	1.31721	2.27985e-42	0.735416	2.6279e-10	1.48691	3.47608e-47	-0.581794	2.12029e-08	0.169703	0.204492	0.751497	1.27009e-11
ENSG00000075407	ZNF37A	zinc finger protein 37A [Source:HGNC Symbol;Acc:HGNC:13102]	protein_coding	0.093024	-0.33498	0.0274925	-0.232692	0.315115	-0.295768	0.0806495	0.102288	0.578144	0.0392123	0.886165	-0.0630758	0.774916
ENSG00000075413	MARK3	MAP/microtubule affinity-regulating kinase 3 [Source:HGNC Symbol;Acc:HGNC:6897]	protein_coding	2.98898e-19	0.683644	9.73426e-15	-0.0675493	0.688868	0.361725	0.000273566	-0.751193	4.1843e-15	-0.321918	0.00400962	0.429275	6.36372e-05
ENSG00000075415	SLC25A3	solute carrier family 25 (mitochondrial carrier; phosphate carrier), member 3 [Source:HGNC Symbol;Acc:HGNC:10989]	protein_coding	4.65041e-08	-0.467825	2.9157e-05	-0.236382	0.153953	-0.668707	2.9645e-08	0.231442	0.0705368	-0.200882	0.200433	-0.432325	0.00136882
ENSG00000075420	FNDC3B	fibronectin type III domain containing 3B [Source:HGNC Symbol;Acc:HGNC:24670]	protein_coding	7.70093e-34	1.07018	1.57108e-16	-0.604372	0.000349566	0.496426	0.000725165	-1.67456	3.25437e-33	-0.573759	0.000336239	1.1008	7.13008e-13
ENSG00000075426	FOSL2	FOS-like antigen 2 [Source:HGNC Symbol;Acc:HGNC:3798]	protein_coding	0.0851711	-0.0538776	0.790633	0.0762192	0.824389	0.379577	0.0541527	0.130097	0.542108	0.433454	0.0554288	0.303357	0.173283
ENSG00000075539	FRYL	FRY-like [Source:HGNC Symbol;Acc:HGNC:29127]	protein_coding	0.10504	0.247433	0.124996	-0.113072	0.6897	0.18031	0.326305	-0.360505	0.0359486	-0.067123	0.800319	0.293382	0.133547
ENSG00000075568	TMEM131	transmembrane protein 131 [Source:HGNC Symbol;Acc:HGNC:30366]	protein_coding	1.57408e-11	0.555194	1.51924e-08	-0.0529937	0.783601	0.431312	7.34497e-05	-0.608188	1.09307e-08	-0.123882	0.39997	0.484306	3.95095e-05
ENSG00000075618	FSCN1	fascin actin-bundling protein 1 [Source:HGNC Symbol;Acc:HGNC:11148]	protein_coding	6.37986e-11	0.0521469	0.671112	-0.417153	0.0026443	-0.63405	3.30726e-08	-0.469299	4.96553e-05	-0.686197	1.8781e-08	-0.216898	0.112071
ENSG00000075624	ACTB	actin, beta [Source:HGNC Symbol;Acc:HGNC:132]	protein_coding	9.65515e-18	0.648742	1.07153e-06	-0.373071	0.0456515	-0.433898	0.0037076	-1.02181	6.97408e-13	-1.08264	5.13767e-13	-0.0608272	0.761993
ENSG00000075643	MOCOS	molybdenum cofactor sulfurase [Source:HGNC Symbol;Acc:HGNC:18234]	protein_coding	0.0157762	-0.316654	0.0144735	-0.248954	0.184105	-0.380816	0.00694203	0.0676999	0.674859	-0.0641621	0.769885	-0.131862	0.447172
ENSG00000075651	PLD1	phospholipase D1, phosphatidylcholine-specific [Source:HGNC Symbol;Acc:HGNC:9067]	protein_coding	1.62395e-11	0.858482	1.98375e-11	0.371749	0.0398546	0.760727	6.04638e-08	-0.486733	0.000645772	-0.0977553	0.645739	0.388978	0.0152913
ENSG00000075702	WDR62	WD repeat domain 62 [Source:HGNC Symbol;Acc:HGNC:24502]	protein_coding	5.43479e-72	-3.64343	3.54659e-54	-0.119148	0.783601	-3.12189	4.78617e-36	3.52429	1.85063e-44	0.52154	0.132142	-3.00275	2.22346e-29
ENSG00000075711	DLG1	discs, large homolog 1 (Drosophila) [Source:HGNC Symbol;Acc:HGNC:2900]	protein_coding	0.00179173	0.238424	0.0197468	-0.1549	0.330452	0.112353	0.351008	-0.393324	0.000289482	-0.126071	0.39027	0.267253	0.030346
ENSG00000075785	RAB7A	RAB7A, member RAS oncogene family [Source:HGNC Symbol;Acc:HGNC:9788]	protein_coding	6.18475e-20	0.64353	1.4099e-16	-0.00141238	0.994981	0.198086	0.02932	-0.644943	2.40774e-14	-0.445444	1.54052e-06	0.199499	0.0461445
ENSG00000075790	BCAP29	B-cell receptor-associated protein 29 [Source:HGNC Symbol;Acc:HGNC:24131]	protein_coding	1.96872e-10	0.524556	9.7873e-07	-0.214471	0.189665	0.150295	0.244085	-0.739027	1.50522e-10	-0.374261	0.00549144	0.364765	0.00580059
ENSG00000075826	SEC31B	SEC31 homolog B (S. cerevisiae) [Source:HGNC Symbol;Acc:HGNC:23197]	protein_coding	1.08294e-10	-0.371492	0.0826316	0.638942	0.0125593	0.910854	1.09971e-05	1.01043	2.05071e-06	1.28235	1.21234e-08	0.271911	0.27102
ENSG00000075856	SART3	squamous cell carcinoma antigen recognized by T cells 3 [Source:HGNC Symbol;Acc:HGNC:16860]	protein_coding	0.0278665	0.0173992	0.838809	-0.0748467	0.545557	-0.195439	0.0158795	-0.0922459	0.278284	-0.212838	0.0212667	-0.120592	0.197528
ENSG00000075914	EXOSC7	exosome component 7 [Source:HGNC Symbol;Acc:HGNC:28112]	protein_coding	3.18607e-12	-0.788987	5.31644e-10	-0.192072	0.343307	-0.766974	3.07844e-08	0.596915	1.97115e-05	0.0220125	0.929689	-0.574902	0.000177216
ENSG00000075945	KIFAP3	kinesin-associated protein 3 [Source:HGNC Symbol;Acc:HGNC:17060]	protein_coding	1.65841e-62	1.30229	1.70593e-34	-0.497341	0.000509422	0.690781	5.37334e-09	-1.79963	2.49067e-54	-0.611507	1.38727e-06	1.18812	7.18716e-21
ENSG00000075975	MKRN2	makorin ring finger protein 2 [Source:HGNC Symbol;Acc:HGNC:7113]	protein_coding	0.0817663	-0.240153	0.0177956	-0.179007	0.22984	-0.160421	0.163424	0.0611452	0.622652	0.0797313	0.617091	0.0185861	0.903519
ENSG00000076003	MCM6	minichromosome maintenance complex component 6 [Source:HGNC Symbol;Acc:HGNC:6949]	protein_coding	2.07691e-208	-3.34616	5.42095e-148	-0.300164	0.103104	-3.25135	2.57829e-120	3.046	1.85536e-106	0.0948137	0.684659	-2.95119	2.98648e-87
ENSG00000076043	REXO2	RNA exonuclease 2 [Source:HGNC Symbol;Acc:HGNC:17851]	protein_coding	0.0868068	0.00243229	0.987546	-0.153303	0.480806	-0.306942	0.0371165	-0.155735	0.311481	-0.309375	0.0723468	-0.15364	0.380654
ENSG00000076053	RBM7	RNA binding motif protein 7 [Source:HGNC Symbol;Acc:HGNC:9904]	protein_coding	0.0470475	0.0270785	0.870203	-0.355817	0.06574	-0.11428	0.503125	-0.382895	0.0126183	-0.141358	0.502763	0.241537	0.176009
ENSG00000076067	RBMS2	RNA binding motif, single stranded interacting protein 2 [Source:HGNC Symbol;Acc:HGNC:9909]	protein_coding	8.66034e-19	1.10785	6.1605e-14	-0.146329	0.585568	0.592555	0.000365364	-1.25418	4.44807e-15	-0.515295	0.00621771	0.738884	3.70482e-05
ENSG00000076108	BAZ2A	bromodomain adjacent to zinc finger domain, 2A [Source:HGNC Symbol;Acc:HGNC:962]	protein_coding	7.40771e-11	0.561578	1.2369e-08	0.0290988	0.890112	0.48889	6.79751e-06	-0.532479	7.37557e-07	-0.0726882	0.658188	0.459791	0.000109772
ENSG00000076201	PTPN23	protein tyrosine phosphatase, non-receptor type 23 [Source:HGNC Symbol;Acc:HGNC:14406]	protein_coding	2.19428e-08	0.442588	3.12085e-08	0.0859979	0.539029	0.324958	0.000255302	-0.35659	4.81657e-05	-0.11763	0.314356	0.23896	0.0163361
ENSG00000076242	MLH1	mutL homolog 1 [Source:HGNC Symbol;Acc:HGNC:7127]	protein_coding	1.59634e-19	-0.751257	5.9877e-12	-0.134426	0.466149	-0.915859	1.16903e-14	0.616831	2.42424e-07	-0.164602	0.316072	-0.781433	1.55002e-09
ENSG00000076248	UNG	uracil-DNA glycosylase [Source:HGNC Symbol;Acc:HGNC:12572]	protein_coding	9.77077e-125	-1.94393	1.81768e-84	-0.0793942	0.658682	-1.7356	8.12068e-59	1.86454	1.4658e-67	0.208331	0.159549	-1.65621	5.18623e-47
ENSG00000076258	FMO4	flavin containing monooxygenase 4 [Source:HGNC Symbol;Acc:HGNC:3772]	protein_coding	2.73926e-06	0.887068	2.33394e-06	0.238984	0.454347	0.737103	0.000373762	-0.648084	0.00161761	-0.149965	0.612537	0.498119	0.0314139
ENSG00000076321	KLHL20	kelch-like family member 20 [Source:HGNC Symbol;Acc:HGNC:25056]	protein_coding	0.149335	0.183783	0.205452	-0.110924	0.651712	0.156731	0.33608	-0.294707	0.0553548	-0.0270517	0.914553	0.267655	0.12122
ENSG00000076351	SLC46A1	solute carrier family 46 (folate transporter), member 1 [Source:HGNC Symbol;Acc:HGNC:30521]	protein_coding	5.05293e-06	-1.29613	2.18269e-05	0.274343	0.582732	-0.253741	0.478566	1.57048	1.24129e-06	1.04239	0.00658812	-0.528084	0.15324
ENSG00000076356	PLXNA2	plexin A2 [Source:HGNC Symbol;Acc:HGNC:9100]	protein_coding	3.01305e-24	1.11621	1.08615e-14	-0.225153	0.344833	0.955514	1.61702e-09	-1.34136	8.98342e-18	-0.160692	0.47225	1.18067	4.46756e-12
ENSG00000076382	SPAG5	sperm associated antigen 5 [Source:HGNC Symbol;Acc:HGNC:13452]	protein_coding	1.18737e-30	-3.80045	6.54664e-25	-0.169176	0.819816	-3.54623	8.8119e-19	3.63128	9.76355e-20	0.254226	0.691897	-3.37705	6.84887e-15
ENSG00000076513	ANKRD13A	ankyrin repeat domain 13A [Source:HGNC Symbol;Acc:HGNC:21268]	protein_coding	7.66915e-23	0.590987	7.93566e-17	0.133388	0.232338	0.60053	4.73156e-15	-0.457599	3.08025e-09	0.00954293	0.944753	0.467141	2.39962e-08
ENSG00000076554	TPD52	tumor protein D52 [Source:HGNC Symbol;Acc:HGNC:12005]	protein_coding	0.0037728	0.0300215	0.87885	-0.0474671	0.889705	0.516299	0.00434355	-0.0774886	0.710449	0.486277	0.0189557	0.563766	0.00422709
ENSG00000076555	ACACB	acetyl-CoA carboxylase beta [Source:HGNC Symbol;Acc:HGNC:85]	protein_coding	2.63751e-14	0.748708	3.22951e-06	0.770581	0.00013091	1.35343	1.48542e-15	0.0218739	0.920464	0.604723	0.00189148	0.582849	0.00226753
ENSG00000076604	TRAF4	TNF receptor-associated factor 4 [Source:HGNC Symbol;Acc:HGNC:12034]	protein_coding	1.28444e-07	0.694171	2.81365e-07	0.0260166	0.930219	0.350681	0.0235197	-0.668155	5.9091e-06	-0.343491	0.0559051	0.324664	0.0587853
ENSG00000076641	PAG1	phosphoprotein membrane anchor with glycosphingolipid microdomains 1 [Source:HGNC Symbol;Acc:HGNC:30043]	protein_coding	0.086058	0.131755	0.830809	0.0577521	0.962457	1.19048	0.04431	-0.0740031	0.916884	1.05872	0.133914	1.13273	0.084429
ENSG00000076650	GPATCH1	G patch domain containing 1 [Source:HGNC Symbol;Acc:HGNC:24658]	protein_coding	1.1585e-08	0.528198	7.01185e-07	0.0169821	0.943291	0.469657	5.70394e-05	-0.511216	1.03195e-05	-0.0585415	0.745935	0.452675	0.000386067
ENSG00000076662	ICAM3	intercellular adhesion molecule 3 [Source:HGNC Symbol;Acc:HGNC:5346]	protein_coding	0.00348599	-0.435862	0.0245726	0.188968	0.54869	-0.370484	0.0859289	0.62483	0.00228909	0.0653778	0.849402	-0.559452	0.0138585
ENSG00000076685	NT5C2	5'-nucleotidase, cytosolic II [Source:HGNC Symbol;Acc:HGNC:8022]	protein_coding	5.34163e-23	0.801666	1.21367e-16	-0.034085	0.866978	0.619061	6.10023e-09	-0.835751	1.77434e-15	-0.182605	0.184739	0.653146	1.57646e-08
ENSG00000076770	MBNL3	muscleblind-like splicing regulator 3 [Source:HGNC Symbol;Acc:HGNC:20564]	protein_coding	0.000598673	-0.533715	6.42118e-05	-0.298743	0.123377	-0.160459	0.316905	0.234973	0.127864	0.373256	0.0306033	0.138283	0.450191
ENSG00000076826	CAMSAP3	calmodulin regulated spectrin-associated protein family, member 3 [Source:HGNC Symbol;Acc:HGNC:29307]	protein_coding	4.82013e-08	0.596309	2.16404e-08	0.2658	0.0842957	0.513553	1.19383e-05	-0.33051	0.00556924	-0.0827559	0.634981	0.247754	0.0673806
ENSG00000076864	RAP1GAP	RAP1 GTPase activating protein [Source:HGNC Symbol;Acc:HGNC:9858]	protein_coding	8.76635e-44	1.83896	4.79024e-37	0.463083	0.0235525	1.63991	2.27406e-25	-1.37588	2.59857e-18	-0.19905	0.361139	1.17683	8.61811e-12
ENSG00000076924	XAB2	XPA binding protein 2 [Source:HGNC Symbol;Acc:HGNC:14089]	protein_coding	0.763544	0.0246559	0.861354	0.109547	0.595313	0.0987389	0.495895	0.0848913	0.558631	0.074083	0.705195	-0.0108083	0.951948
ENSG00000076928	ARHGEF1	Rho guanine nucleotide exchange factor (GEF) 1 [Source:HGNC Symbol;Acc:HGNC:681]	protein_coding	1.14431e-33	0.800627	1.67136e-24	-0.0933554	0.498332	0.377027	1.86844e-05	-0.893982	6.00268e-26	-0.423599	7.27651e-06	0.470383	6.95031e-07
ENSG00000076944	STXBP2	syntaxin binding protein 2 [Source:HGNC Symbol;Acc:HGNC:11445]	protein_coding	5.4441e-19	0.840754	1.39517e-17	0.152749	0.348225	0.556674	3.39363e-07	-0.688005	1.59092e-10	-0.28408	0.029021	0.403925	0.000866914
ENSG00000076984	MAP2K7	mitogen-activated protein kinase kinase 7 [Source:HGNC Symbol;Acc:HGNC:6847]	protein_coding	4.90613e-11	0.597694	2.11084e-10	0.0744762	0.673828	0.383159	0.000272211	-0.523218	3.42721e-07	-0.214535	0.0938058	0.308683	0.00830278
ENSG00000077044	DGKD	diacylglycerol kinase, delta 130kDa [Source:HGNC Symbol;Acc:HGNC:2851]	protein_coding	4.02779e-50	-1.2392	6.36153e-40	-0.372092	0.00197677	-1.11331	3.18937e-28	0.867108	2.61187e-17	0.125892	0.396435	-0.741216	2.55804e-11
ENSG00000077092	RARB	retinoic acid receptor, beta [Source:HGNC Symbol;Acc:HGNC:9865]	protein_coding	8.73549e-13	1.43628	1.64289e-09	0.179161	0.701765	1.43183	2.52857e-08	-1.25712	1.12713e-06	-0.0044504	0.99232	1.25267	7.59117e-06
ENSG00000077097	TOP2B	topoisomerase (DNA) II beta 180kDa [Source:HGNC Symbol;Acc:HGNC:11990]	protein_coding	3.07062e-09	-0.606207	1.33424e-09	-0.149861	0.357867	-0.408493	0.000240478	0.456346	3.45783e-05	0.197715	0.159549	-0.258632	0.0408265
ENSG00000077147	TM9SF3	transmembrane 9 superfamily member 3 [Source:HGNC Symbol;Acc:HGNC:21529]	protein_coding	0.000625835	0.384506	0.0247808	-0.123466	0.6895	0.520839	0.00494621	-0.507971	0.00576094	0.136333	0.60795	0.644304	0.00124674
ENSG00000077150	NFKB2	nuclear factor of kappa light polypeptide gene enhancer in B-cells 2 (p49/p100) [Source:HGNC Symbol;Acc:HGNC:7795]	protein_coding	1.02988e-09	0.753755	7.79246e-10	0.283289	0.118542	0.629489	3.07694e-06	-0.470466	0.000527794	-0.124266	0.514858	0.3462	0.0241957
ENSG00000077152	UBE2T	ubiquitin-conjugating enzyme E2T [Source:HGNC Symbol;Acc:HGNC:25009]	protein_coding	2.62015e-43	-2.80072	1.05738e-27	-0.300937	0.486459	-3.25114	1.24785e-30	2.49979	2.43427e-19	-0.450418	0.253965	-2.95021	2.88492e-22
ENSG00000077157	PPP1R12B	protein phosphatase 1, regulatory subunit 12B [Source:HGNC Symbol;Acc:HGNC:7619]	protein_coding	0.394149	-0.152329	0.278601	-0.0189677	0.947277	0.0782123	0.632688	0.133362	0.393369	0.230542	0.203713	0.09718	0.594155
ENSG00000077232	DNAJC10	DnaJ (Hsp40) homolog, subfamily C, member 10 [Source:HGNC Symbol;Acc:HGNC:24637]	protein_coding	0.78535	0.101119	0.493274	0.134693	0.557449	0.0692031	0.684502	0.0335749	0.847052	-0.0319155	0.896931	-0.0654904	0.738399
ENSG00000077235	GTF3C1	general transcription factor IIIC, polypeptide 1, alpha 220kDa [Source:HGNC Symbol;Acc:HGNC:4664]	protein_coding	0.00147507	-0.163853	0.0597963	0.0635833	0.677437	-0.255376	0.00611031	0.227436	0.0143155	-0.0915234	0.470056	-0.318959	0.00143665
ENSG00000077238	IL4R	interleukin 4 receptor [Source:HGNC Symbol;Acc:HGNC:6015]	protein_coding	1.48154e-25	0.777253	4.32775e-16	-0.152149	0.334573	0.593237	1.74886e-08	-0.929402	2.56363e-19	-0.184016	0.174264	0.745386	4.83926e-11
ENSG00000077254	USP33	ubiquitin specific peptidase 33 [Source:HGNC Symbol;Acc:HGNC:20059]	protein_coding	0.0462409	0.0165891	0.897142	-0.258029	0.0842234	0.030378	0.826956	-0.274618	0.0196239	0.0137889	0.945322	0.288407	0.02652
ENSG00000077312	SNRPA	small nuclear ribonucleoprotein polypeptide A [Source:HGNC Symbol;Acc:HGNC:11151]	protein_coding	4.85492e-27	-1.02537	7.53173e-15	0.063111	0.810959	-1.15723	7.0544e-16	1.08848	2.30581e-14	-0.131863	0.53497	-1.22035	2.84632e-15
ENSG00000077348	EXOSC5	exosome component 5 [Source:HGNC Symbol;Acc:HGNC:24662]	protein_coding	1.775e-40	-1.70825	2.62452e-25	0.0794485	0.784619	-1.50849	7.76629e-18	1.7877	1.4621e-24	0.199761	0.464146	-1.58794	1.72158e-17
ENSG00000077380	DYNC1I2	dynein, cytoplasmic 1, intermediate chain 2 [Source:HGNC Symbol;Acc:HGNC:2964]	protein_coding	1.56931e-19	0.644698	2.34289e-15	-0.0469181	0.770828	0.324413	0.000410727	-0.691616	4.56949e-15	-0.320284	0.0016695	0.371331	0.000188123
ENSG00000077454	LRCH4	leucine-rich repeats and calponin homology (CH) domain containing 4 [Source:HGNC Symbol;Acc:HGNC:6691]	protein_coding	3.73335e-38	1.23661	3.49038e-33	0.172677	0.307715	0.780483	6.52962e-12	-1.06394	2.21874e-21	-0.456131	0.00036914	0.607806	1.14202e-06
ENSG00000077458	FAM76B	family with sequence similarity 76, member B [Source:HGNC Symbol;Acc:HGNC:28492]	protein_coding	0.504374	-0.0971052	0.561311	-0.0597877	0.839757	0.131287	0.469285	0.0373175	0.848186	0.228392	0.280846	0.191074	0.331677
ENSG00000077463	SIRT6	sirtuin 6 [Source:HGNC Symbol;Acc:HGNC:14934]	protein_coding	1.14923e-13	0.915129	2.08965e-12	0.127778	0.589154	0.644153	8.34005e-06	-0.78735	2.90432e-08	-0.270976	0.131622	0.516374	0.00121523
ENSG00000077514	POLD3	polymerase (DNA-directed), delta 3, accessory subunit [Source:HGNC Symbol;Acc:HGNC:20932]	protein_coding	1.34625e-18	-1.00565	3.68544e-13	0.0248033	0.933732	-0.873841	7.15082e-09	1.03045	5.70736e-12	0.131809	0.558562	-0.898644	3.81542e-08
ENSG00000077549	CAPZB	capping protein (actin filament) muscle Z-line, beta [Source:HGNC Symbol;Acc:HGNC:1491]	protein_coding	0.000370112	0.349022	0.000117186	0.0608233	0.721594	0.0761857	0.499055	-0.288198	0.00394348	-0.272836	0.0180563	0.0153624	0.913265
ENSG00000077585	GPR137B	G protein-coupled receptor 137B [Source:HGNC Symbol;Acc:HGNC:11862]	protein_coding	0.766592	-0.127835	0.655767	-0.276141	0.513232	-0.0771378	0.813484	-0.148306	0.639894	0.0506972	0.913414	0.199003	0.571416
ENSG00000077684	JADE1	jade family PHD finger 1 [Source:HGNC Symbol;Acc:HGNC:30027]	protein_coding	2.65653e-13	-1.12347	2.08965e-12	0.0426345	0.898136	-0.217707	0.249245	1.16611	1.3435e-11	0.905765	1.89333e-06	-0.260342	0.207695
ENSG00000077713	SLC25A43	solute carrier family 25, member 43 [Source:HGNC Symbol;Acc:HGNC:30557]	protein_coding	0.00971598	0.241546	0.0937074	-0.240263	0.257686	0.119704	0.480327	-0.481808	0.00137776	-0.121842	0.572473	0.359966	0.0346356
ENSG00000077721	UBE2A	ubiquitin-conjugating enzyme E2A [Source:HGNC Symbol;Acc:HGNC:12472]	protein_coding	7.08222e-15	0.469821	3.58125e-09	-0.187769	0.110266	0.179215	0.0536198	-0.657591	1.77141e-14	-0.290606	0.00367564	0.366984	0.000142944
ENSG00000077782	FGFR1	fibroblast growth factor receptor 1 [Source:HGNC Symbol;Acc:HGNC:3688]	protein_coding	0.0359217	-0.164192	0.560344	-0.479616	0.204348	-0.724826	0.010139	-0.315425	0.288942	-0.560635	0.0980282	-0.24521	0.481615
ENSG00000078018	MAP2	microtubule-associated protein 2 [Source:HGNC Symbol;Acc:HGNC:6839]	protein_coding	0.155185	-0.708195	0.107886	-0.533496	0.431487	-0.917601	0.0568661	0.174699	0.74901	-0.209406	0.779989	-0.384105	0.515068
ENSG00000078043	PIAS2	protein inhibitor of activated STAT, 2 [Source:HGNC Symbol;Acc:HGNC:17311]	protein_coding	1.30084e-21	-1.89404	4.01862e-15	-0.186812	0.633955	-1.7909	5.13645e-12	1.70723	4.52516e-11	0.103145	0.827816	-1.60408	1.03533e-08
ENSG00000078061	ARAF	A-Raf proto-oncogene, serine/threonine kinase [Source:HGNC Symbol;Acc:HGNC:646]	protein_coding	2.46798e-08	0.43665	1.87603e-09	0.148966	0.176886	0.196936	0.0183719	-0.287684	0.000352767	-0.239713	0.00986999	0.0479703	0.653898
ENSG00000078070	MCCC1	methylcrotonoyl-CoA carboxylase 1 (alpha) [Source:HGNC Symbol;Acc:HGNC:6936]	protein_coding	5.75462e-08	-0.699425	3.54697e-06	0.120737	0.647684	-0.458151	0.0061112	0.820163	3.76145e-07	0.241274	0.275067	-0.578888	0.00117196
ENSG00000078081	LAMP3	lysosomal-associated membrane protein 3 [Source:HGNC Symbol;Acc:HGNC:14582]	protein_coding	0.00241518	-0.993604	0.00127051	-0.166265	0.771976	-0.813154	0.0174832	0.827339	0.015046	0.18045	0.730086	-0.646889	0.0925825
ENSG00000078114	NEBL	nebulette [Source:HGNC Symbol;Acc:HGNC:16932]	protein_coding	0.0231941	-0.181504	0.420295	-0.2179	0.533426	0.389588	0.0969324	-0.0363962	0.894826	0.571092	0.0290315	0.607488	0.014826
ENSG00000078124	ACER3	alkaline ceramidase 3 [Source:HGNC Symbol;Acc:HGNC:16066]	protein_coding	5.50802e-06	0.291664	0.0192682	-0.3613	0.0303916	-0.115247	0.441069	-0.652964	5.78312e-07	-0.406911	0.00748037	0.246052	0.114373
ENSG00000078140	UBE2K	ubiquitin-conjugating enzyme E2K [Source:HGNC Symbol;Acc:HGNC:4914]	protein_coding	7.30212e-05	-0.0589621	0.511707	-0.332791	0.00123339	-0.274697	0.00203571	-0.273829	0.00199415	-0.215735	0.0399191	0.0580939	0.614987
ENSG00000078142	PIK3C3	phosphatidylinositol 3-kinase, catalytic subunit type 3 [Source:HGNC Symbol;Acc:HGNC:8974]	protein_coding	4.20342e-05	0.359765	0.00265719	-0.145385	0.465264	0.323433	0.0146496	-0.505151	8.67462e-05	-0.036332	0.866004	0.468819	0.000929379
ENSG00000078177	N4BP2	NEDD4 binding protein 2 [Source:HGNC Symbol;Acc:HGNC:29851]	protein_coding	0.338684	-0.0437368	0.856888	-0.37082	0.230289	-0.162236	0.519361	-0.327083	0.164683	-0.118499	0.729098	0.208583	0.453843
ENSG00000078237	C12orf5	chromosome 12 open reading frame 5 [Source:HGNC Symbol;Acc:HGNC:1185]	protein_coding	0.0140969	-0.264846	0.0274867	-0.33785	0.0320846	-0.305523	0.0194981	-0.073004	0.620971	-0.0406775	0.84896	0.0323265	0.856868
ENSG00000078246	TULP3	tubby like protein 3 [Source:HGNC Symbol;Acc:HGNC:12425]	protein_coding	0.00113564	0.41077	0.000215203	0.177801	0.306738	0.329164	0.00764105	-0.232969	0.0619301	-0.0816056	0.650464	0.151363	0.298285
ENSG00000078269	SYNJ2	synaptojanin 2 [Source:HGNC Symbol;Acc:HGNC:11504]	protein_coding	7.87656e-25	0.990048	2.26132e-15	-0.321569	0.0792177	0.36854	0.010505	-1.31162	2.4276e-22	-0.621507	4.06152e-05	0.690109	4.92772e-06
ENSG00000078304	PPP2R5C	protein phosphatase 2, regulatory subunit B', gamma [Source:HGNC Symbol;Acc:HGNC:9311]	protein_coding	7.67531e-21	0.359245	6.64576e-08	-0.323506	0.000135298	-0.0229711	0.79626	-0.682751	7.17545e-22	-0.382216	1.02641e-06	0.300535	0.00019124
ENSG00000078319	PMS2P1	postmeiotic segregation increased 2 pseudogene 1 [Source:HGNC Symbol;Acc:HGNC:9123]	unprocessed_pseudogene	7.5928e-07	-0.574873	0.000448977	-0.110324	0.705764	-0.849649	1.9465e-06	0.464549	0.0100954	-0.274776	0.258624	-0.739325	0.000153732
ENSG00000078369	GNB1	guanine nucleotide binding protein (G protein), beta polypeptide 1 [Source:HGNC Symbol;Acc:HGNC:4396]	protein_coding	5.02428e-11	0.474029	2.81624e-07	-0.172357	0.228482	0.0984351	0.387221	-0.646387	7.69232e-11	-0.375594	0.000941241	0.270792	0.0188887
ENSG00000078399	HOXA9	homeobox A9 [Source:HGNC Symbol;Acc:HGNC:5109]	protein_coding	2.72405e-18	-2.66097	7.01206e-14	-0.397927	0.388479	-2.07767	5.65253e-09	2.26304	2.59297e-09	0.583298	0.308467	-1.67974	1.54878e-05
ENSG00000078401	EDN1	endothelin 1 [Source:HGNC Symbol;Acc:HGNC:3176]	protein_coding	0.148846	-0.128587	0.647464	-0.20673	0.64025	-0.600933	0.031833	-0.0781425	0.807567	-0.472345	0.166719	-0.394203	0.221568
ENSG00000078403	MLLT10	myeloid/lymphoid or mixed-lineage leukemia (trithorax homolog, Drosophila); translocated to, 10 [Source:HGNC Symbol;Acc:HGNC:16063]	protein_coding	0.00948765	-0.120649	0.319839	-0.0274644	0.906548	0.262853	0.0352684	0.0931846	0.493954	0.383503	0.00543668	0.290318	0.0330198
ENSG00000078487	ZCWPW1	zinc finger, CW type with PWWP domain 1 [Source:HGNC Symbol;Acc:HGNC:23486]	protein_coding	0.133216	-0.229463	0.37044	0.218089	0.585497	0.297114	0.273723	0.447552	0.0899314	0.526577	0.0895562	0.079025	0.817733
ENSG00000078618	NRD1	nardilysin (N-arginine dibasic convertase) [Source:HGNC Symbol;Acc:HGNC:7995]	protein_coding	4.36718e-08	-0.28234	8.94922e-05	-0.0464279	0.730932	-0.397475	3.15797e-07	0.235912	0.00296179	-0.115135	0.267004	-0.351047	3.76227e-05
ENSG00000078668	VDAC3	voltage-dependent anion channel 3 [Source:HGNC Symbol;Acc:HGNC:12674]	protein_coding	1.07766e-26	-0.85692	2.18211e-18	-0.114835	0.498172	-0.873992	2.38799e-16	0.742085	3.56382e-12	-0.017072	0.929119	-0.759157	6.12701e-11
ENSG00000078674	PCM1	pericentriolar material 1 [Source:HGNC Symbol;Acc:HGNC:8727]	protein_coding	1.48347e-09	-0.581107	1.02962e-09	-0.132478	0.399112	-0.399377	0.000157167	0.448629	1.84174e-05	0.18173	0.17836	-0.266898	0.0254971
ENSG00000078687	TNRC6C	trinucleotide repeat containing 6C [Source:HGNC Symbol;Acc:HGNC:29318]	protein_coding	1.99814e-06	0.564221	3.38861e-05	0.0886853	0.730996	0.595124	5.8486e-05	-0.475536	0.00145949	0.0309024	0.903077	0.506439	0.00190562
ENSG00000078699	CBFA2T2	core-binding factor, runt domain, alpha subunit 2; translocated to, 2 [Source:HGNC Symbol;Acc:HGNC:1536]	protein_coding	1.30929e-06	-0.147317	0.18776	0.272418	0.0585315	0.382448	0.000747451	0.419735	0.000203093	0.529765	1.44557e-05	0.11003	0.432829
ENSG00000078747	ITCH	itchy E3 ubiquitin protein ligase [Source:HGNC Symbol;Acc:HGNC:13890]	protein_coding	1.81905e-24	0.856404	1.06524e-13	-0.366479	0.0229865	0.432918	0.000892563	-1.22288	7.09977e-23	-0.423485	0.00364702	0.799397	5.84326e-09
ENSG00000078804	TP53INP2	tumor protein p53 inducible nuclear protein 2 [Source:HGNC Symbol;Acc:HGNC:16104]	protein_coding	4.14646e-28	3.22441	9.25808e-26	0.51065	0.311209	2.58755	1.48508e-14	-2.71376	5.0943e-16	-0.636859	0.140911	2.0769	1.73891e-08
ENSG00000078808	SDF4	stromal cell derived factor 4 [Source:HGNC Symbol;Acc:HGNC:24188]	protein_coding	0.0007591	0.287876	0.000115148	0.23142	0.0222724	0.158115	0.0652194	-0.0564555	0.540733	-0.12976	0.214768	-0.0733049	0.476179
ENSG00000078900	TP73	tumor protein p73 [Source:HGNC Symbol;Acc:HGNC:12003]	protein_coding	1.486e-79	-2.39074	5.54454e-54	0.0998344	0.683245	-1.60199	3.27833e-25	2.49057	8.84132e-53	0.788745	8.92036e-05	-1.70183	2.62804e-25
ENSG00000078902	TOLLIP	toll interacting protein [Source:HGNC Symbol;Acc:HGNC:16476]	protein_coding	2.1489e-19	0.686715	2.22967e-15	0.0602339	0.720016	0.562369	3.23317e-09	-0.626481	3.00269e-11	-0.124346	0.332917	0.502135	1.3299e-06
ENSG00000078967	UBE2D4	ubiquitin-conjugating enzyme E2D 4 (putative) [Source:HGNC Symbol;Acc:HGNC:21647]	protein_coding	0.462478	-0.117863	0.427805	-0.0507529	0.849405	-0.219657	0.16323	0.0671103	0.695843	-0.101793	0.645739	-0.168904	0.34802
ENSG00000079112	CDH17	cadherin 17, LI cadherin (liver-intestine) [Source:HGNC Symbol;Acc:HGNC:1756]	protein_coding	4.89138e-07	0.724091	2.06902e-05	-0.0974902	0.766312	0.582866	0.00209075	-0.821581	8.35165e-06	-0.141224	0.604857	0.680356	0.000895004
ENSG00000079134	THOC1	THO complex 1 [Source:HGNC Symbol;Acc:HGNC:19070]	protein_coding	5.02106e-18	-0.974438	4.44847e-14	-0.0114899	0.969915	-0.745177	1.15557e-07	0.962948	5.02146e-12	0.229261	0.226917	-0.733687	1.50423e-06
ENSG00000079150	FKBP7	FK506 binding protein 7 [Source:HGNC Symbol;Acc:HGNC:3723]	protein_coding	2.49616e-16	-2.90848	2.62444e-12	0.326959	0.585568	-1.50101	0.00019706	3.23544	1.15508e-13	1.40747	0.0102261	-1.82797	1.91715e-05
ENSG00000079246	XRCC5	X-ray repair complementing defective repair in Chinese hamster cells 5 (double-strand-break rejoining) [Source:HGNC Symbol;Acc:HGNC:12833]	protein_coding	3.72444e-14	-0.196497	0.01964	-0.267578	0.0151346	-0.699515	8.20479e-16	-0.0710808	0.478668	-0.503018	9.16626e-08	-0.431937	7.5695e-06
ENSG00000079257	LXN	latexin [Source:HGNC Symbol;Acc:HGNC:13347]	protein_coding	0.00479436	-0.113745	0.556908	0.483764	0.037335	0.0220881	0.923675	0.597509	0.00132868	0.135833	0.622857	-0.461676	0.0273368
ENSG00000079263	SP140	SP140 nuclear body protein [Source:HGNC Symbol;Acc:HGNC:17133]	protein_coding	0.184768	0.352955	0.608425	-0.432553	0.707416	-1.12385	0.143201	-0.785508	0.281008	-1.4768	0.0927577	-0.691294	0.444278
ENSG00000079277	MKNK1	MAP kinase interacting serine/threonine kinase 1 [Source:HGNC Symbol;Acc:HGNC:7110]	protein_coding	3.79569e-05	0.381659	3.42925e-06	0.142852	0.263417	0.231231	0.0129236	-0.238807	0.00894662	-0.150428	0.191212	0.0883796	0.432622
ENSG00000079308	TNS1	tensin 1 [Source:HGNC Symbol;Acc:HGNC:11973]	protein_coding	NA	-0.901908	NA	0.470258	NA	1.18345	NA	1.37217	NA	2.08536	NA	0.71319	NA
ENSG00000079313	REXO1	REX1, RNA exonuclease 1 homolog (S. cerevisiae) [Source:HGNC Symbol;Acc:HGNC:24616]	protein_coding	0.000681781	0.383738	0.0002368	0.0946756	0.60988	0.0469119	0.729606	-0.289063	0.0124738	-0.336826	0.0102614	-0.0477637	0.758987
ENSG00000079332	SAR1A	secretion associated, Ras related GTPase 1A [Source:HGNC Symbol;Acc:HGNC:10534]	protein_coding	0.0831652	0.149035	0.102074	-0.0544235	0.738865	0.123125	0.230134	-0.203459	0.0370684	-0.0259109	0.870666	0.177548	0.106578
ENSG00000079335	CDC14A	cell division cycle 14A [Source:HGNC Symbol;Acc:HGNC:1718]	protein_coding	0.000453851	-0.591738	0.00585276	-0.0963779	0.812034	0.327207	0.171358	0.49536	0.0366571	0.918945	0.0002451	0.423585	0.102
ENSG00000079337	RAPGEF3	Rap guanine nucleotide exchange factor (GEF) 3 [Source:HGNC Symbol;Acc:HGNC:16629]	protein_coding	6.42538e-75	2.14704	1.07851e-53	-0.126342	0.630971	1.52869	1.14067e-23	-2.27338	2.56622e-51	-0.618347	0.000358819	1.65503	7.10255e-24
ENSG00000079385	CEACAM1	carcinoembryonic antigen-related cell adhesion molecule 1 (biliary glycoprotein) [Source:HGNC Symbol;Acc:HGNC:1814]	protein_coding	3.98112e-115	2.31314	1.14439e-82	-0.181058	0.37485	1.38365	8.22894e-26	-2.4942	5.54729e-82	-0.929484	3.75806e-11	1.56471	2.15417e-28
ENSG00000079387	SENP1	SUMO1/sentrin specific peptidase 1 [Source:HGNC Symbol;Acc:HGNC:17927]	protein_coding	0.000317817	-0.409943	0.000849377	-0.171453	0.383157	-0.47916	0.00034388	0.23849	0.0872255	-0.0692172	0.739584	-0.307708	0.0430312
ENSG00000079432	CIC	capicua transcriptional repressor [Source:HGNC Symbol;Acc:HGNC:14214]	protein_coding	2.1117e-13	0.688717	1.54695e-13	0.215889	0.120611	0.496592	1.50057e-06	-0.472828	4.13364e-06	-0.192125	0.13979	0.280703	0.0167996
ENSG00000079435	LIPE	lipase, hormone-sensitive [Source:HGNC Symbol;Acc:HGNC:6621]	protein_coding	0.000835919	-0.395317	0.0944946	0.452512	0.145406	-0.328111	0.212342	0.847829	0.00039372	0.067206	0.873527	-0.780623	0.00298857
ENSG00000079459	FDFT1	farnesyl-diphosphate farnesyltransferase 1 [Source:HGNC Symbol;Acc:HGNC:3629]	protein_coding	0.0980608	0.188954	0.335484	-0.0384672	0.920669	-0.294045	0.163587	-0.227422	0.28565	-0.482999	0.038265	-0.255578	0.28332
ENSG00000079462	PAFAH1B3	platelet-activating factor acetylhydrolase 1b, catalytic subunit 3 (29kDa) [Source:HGNC Symbol;Acc:HGNC:8576]	protein_coding	8.02161e-19	-0.755538	3.75798e-10	0.0943159	0.664444	-0.841855	1.40928e-10	0.849853	5.56808e-11	-0.0863178	0.680044	-0.936171	2.99752e-11
ENSG00000079482	OPHN1	oligophrenin 1 [Source:HGNC Symbol;Acc:HGNC:8148]	protein_coding	0.031674	0.036458	0.799403	0.141145	0.486134	0.346952	0.00971109	0.104687	0.478509	0.310494	0.0493138	0.205807	0.183283
ENSG00000079616	KIF22	kinesin family member 22 [Source:HGNC Symbol;Acc:HGNC:6391]	protein_coding	4.13636e-70	-2.0906	3.95342e-53	-0.100871	0.69709	-1.71139	4.75553e-31	1.98973	1.61776e-41	0.379211	0.0417057	-1.61051	5.31294e-24
ENSG00000079691	LRRC16A	leucine rich repeat containing 16A [Source:HGNC Symbol;Acc:HGNC:21581]	protein_coding	0.445353	0.021113	0.829803	-0.0199588	0.909724	0.118716	0.225137	-0.0410718	0.698161	0.0976028	0.430342	0.138675	0.195657
ENSG00000079739	PGM1	phosphoglucomutase 1 [Source:HGNC Symbol;Acc:HGNC:8905]	protein_coding	4.09738e-11	-0.600985	8.29232e-10	0.0557946	0.767548	-0.196849	0.084893	0.65678	5.4158e-10	0.404136	0.000874217	-0.252644	0.039899
ENSG00000079785	DDX1	DEAD (Asp-Glu-Ala-Asp) box helicase 1 [Source:HGNC Symbol;Acc:HGNC:2734]	protein_coding	3.27339e-05	-0.311354	0.00184424	-0.194489	0.189511	-0.485467	6.03687e-06	0.116865	0.322536	-0.174113	0.210555	-0.290978	0.0169916
ENSG00000079805	DNM2	dynamin 2 [Source:HGNC Symbol;Acc:HGNC:2974]	protein_coding	0.536235	-0.0644592	0.760948	-0.103895	0.765028	0.169982	0.444941	-0.0394361	0.869957	0.234441	0.377245	0.273877	0.249068
ENSG00000079819	EPB41L2	erythrocyte membrane protein band 4.1-like 2 [Source:HGNC Symbol;Acc:HGNC:3379]	protein_coding	1.01961e-08	-0.824075	3.67855e-06	-0.225574	0.448121	-1.02063	1.29485e-07	0.598501	0.00244791	-0.196554	0.47225	-0.795055	0.000200062
ENSG00000079950	STX7	syntaxin 7 [Source:HGNC Symbol;Acc:HGNC:11442]	protein_coding	6.69549e-11	0.688487	1.35273e-07	-0.117994	0.621026	0.545869	0.000162936	-0.806482	1.1695e-08	-0.142618	0.475261	0.663863	2.13683e-05
ENSG00000079974	RABL2B	RAB, member of RAS oncogene family-like 2B [Source:HGNC Symbol;Acc:HGNC:9800]	protein_coding	0.107354	0.155607	0.235795	0.211911	0.256628	0.306497	0.025333	0.0563039	0.717248	0.150889	0.40085	0.0945853	0.578786
ENSG00000079999	KEAP1	kelch-like ECH-associated protein 1 [Source:HGNC Symbol;Acc:HGNC:23177]	protein_coding	0.667007	0.109634	0.335773	0.072436	0.710221	0.000443777	0.997497	-0.0371977	0.783934	-0.10919	0.492996	-0.0719922	0.630918
ENSG00000080031	PTPRH	protein tyrosine phosphatase, receptor type, H [Source:HGNC Symbol;Acc:HGNC:9672]	protein_coding	8.39926e-62	2.29654	2.23202e-51	0.328839	0.162661	1.82269	5.63103e-28	-1.9677	1.19708e-32	-0.473848	0.018187	1.49385	1.36265e-16
ENSG00000080189	SLC35C2	solute carrier family 35 (GDP-fucose transporter), member C2 [Source:HGNC Symbol;Acc:HGNC:17117]	protein_coding	1.06405e-06	0.468301	1.83799e-06	0.174414	0.254501	0.452462	2.66581e-05	-0.293887	0.00738388	-0.0158383	0.932309	0.278049	0.0228823
ENSG00000080200	CRYBG3	beta-gamma crystallin domain containing 3 [Source:HGNC Symbol;Acc:HGNC:34427]	protein_coding	0.154959	-0.27909	0.0425006	-0.046326	0.862364	-0.0507783	0.767915	0.232764	0.127163	0.228311	0.220693	-0.00445232	0.982669
ENSG00000080298	RFX3	regulatory factor X, 3 (influences HLA class II expression) [Source:HGNC Symbol;Acc:HGNC:9984]	protein_coding	0.711624	-0.0359944	0.869608	0.0523416	0.888764	0.175818	0.421968	0.088336	0.70224	0.211812	0.434353	0.123476	0.629704
ENSG00000080345	RIF1	replication timing regulatory factor 1 [Source:HGNC Symbol;Acc:HGNC:23207]	protein_coding	4.91243e-10	-0.846306	2.1134e-09	-0.492212	0.00988123	-0.791017	3.2535e-07	0.354094	0.0287454	0.0552887	0.828855	-0.298805	0.10257
ENSG00000080371	RAB21	RAB21, member RAS oncogene family [Source:HGNC Symbol;Acc:HGNC:18263]	protein_coding	0.000764874	0.0801548	0.575126	-0.417537	0.0138341	-0.243598	0.0963624	-0.497692	0.000313569	-0.323753	0.0510773	0.173939	0.302965
ENSG00000080503	SMARCA2	SWI/SNF related, matrix associated, actin dependent regulator of chromatin, subfamily a, member 2 [Source:HGNC Symbol;Acc:HGNC:11098]	protein_coding	6.09238e-23	0.750857	6.30151e-13	0.0289425	0.898754	0.887512	3.3349e-15	-0.721914	2.0475e-10	0.136655	0.379024	0.858569	2.19979e-12
ENSG00000080546	SESN1	sestrin 1 [Source:HGNC Symbol;Acc:HGNC:21595]	protein_coding	0.0061565	0.100932	0.542539	0.282235	0.190288	0.497935	0.00169349	0.181303	0.291119	0.397003	0.033891	0.215701	0.246703
ENSG00000080561	MID2	midline 2 [Source:HGNC Symbol;Acc:HGNC:7096]	protein_coding	6.15533e-05	0.404309	0.00654542	-0.261628	0.251394	0.309465	0.0638669	-0.665936	2.99959e-05	-0.094844	0.694543	0.571092	0.00118947
ENSG00000080573	COL5A3	collagen, type V, alpha 3 [Source:HGNC Symbol;Acc:HGNC:14864]	protein_coding	0.000954318	1.57972	0.00088346	1.55632	0.0122873	1.82855	0.000327504	-0.0233918	0.970481	0.248835	0.741065	0.272227	0.671618
ENSG00000080603	SRCAP	Snf2-related CREBBP activator protein [Source:HGNC Symbol;Acc:HGNC:16974]	protein_coding	8.70538e-05	0.318603	3.04886e-05	0.0498041	0.730932	0.194526	0.0249799	-0.268799	0.0013954	-0.124077	0.254185	0.144722	0.142134
ENSG00000080608	KIAA0020	KIAA0020 [Source:HGNC Symbol;Acc:HGNC:29676]	protein_coding	1.97974e-25	-0.964875	1.11165e-13	-0.365449	0.0441242	-1.39171	8.3715e-23	0.599426	3.24325e-05	-0.426834	0.0136268	-1.02626	3.56571e-11
ENSG00000080802	CNOT4	CCR4-NOT transcription complex, subunit 4 [Source:HGNC Symbol;Acc:HGNC:7880]	protein_coding	0.376718	0.17792	0.188295	-0.0277869	0.917393	0.0237826	0.889508	-0.205707	0.160455	-0.154137	0.414034	0.0515695	0.786743
ENSG00000080815	PSEN1	presenilin 1 [Source:HGNC Symbol;Acc:HGNC:9508]	protein_coding	6.85807e-45	0.940651	5.36471e-31	-0.0344871	0.83908	0.745681	5.04588e-17	-0.975138	1.66982e-28	-0.19497	0.0812156	0.780168	4.73612e-16
ENSG00000080819	CPOX	coproporphyrinogen oxidase [Source:HGNC Symbol;Acc:HGNC:2321]	protein_coding	2.72413e-12	-1.39876	1.12568e-13	-0.352854	0.216885	-0.670689	0.00136496	1.0459	4.23382e-07	0.728068	0.0022563	-0.317835	0.198089
ENSG00000080822	CLDND1	claudin domain containing 1 [Source:HGNC Symbol;Acc:HGNC:1322]	protein_coding	0.0609949	0.185963	0.295365	-0.29235	0.247944	-0.0166252	0.940652	-0.478313	0.00872841	-0.202588	0.404289	0.275725	0.197116
ENSG00000080823	MOK	MOK protein kinase [Source:HGNC Symbol;Acc:HGNC:9833]	protein_coding	2.02737e-09	-0.372413	0.00107425	0.338926	0.0221688	-0.255743	0.0452594	0.711339	2.09634e-09	0.11667	0.505317	-0.594669	4.73841e-06
ENSG00000080824	HSP90AA1	heat shock protein 90kDa alpha (cytosolic), class A member 1 [Source:HGNC Symbol;Acc:HGNC:5253]	protein_coding	7.13904e-08	-0.464132	9.32734e-05	-0.347223	0.0338914	-0.723056	1.41944e-08	0.116909	0.417641	-0.258924	0.105548	-0.375833	0.00978092
ENSG00000080839	RBL1	retinoblastoma-like 1 [Source:HGNC Symbol;Acc:HGNC:9893]	protein_coding	5.52907e-95	-3.39638	7.8642e-69	-0.277682	0.329405	-2.93635	2.66662e-47	3.1187	2.87724e-51	0.460031	0.111285	-2.65867	2.15688e-34
ENSG00000080845	DLGAP4	discs, large (Drosophila) homolog-associated protein 4 [Source:HGNC Symbol;Acc:HGNC:24476]	protein_coding	1.7843e-17	0.693814	2.44555e-17	0.179722	0.147039	0.43483	1.77615e-06	-0.514092	9.94561e-09	-0.258983	0.0150379	0.255108	0.013473
ENSG00000080854	IGSF9B	immunoglobulin superfamily, member 9B [Source:HGNC Symbol;Acc:HGNC:32326]	protein_coding	2.58921e-18	-2.90375	4.56526e-14	-1.02894	0.0327433	-2.8979	4.56302e-12	1.87481	1.03131e-05	0.0058493	0.995411	-1.86896	5.92665e-05
ENSG00000080947	CROCCP3	ciliary rootlet coiled-coil, rootletin pseudogene 3 [Source:HGNC Symbol;Acc:HGNC:29405]	transcribed_unprocessed_pseudogene	0.0726678	0.388934	0.271492	-0.0780279	0.911003	0.738035	0.0427509	-0.466962	0.224242	0.349102	0.469244	0.816063	0.041156
ENSG00000080986	NDC80	NDC80 kinetochore complex component [Source:HGNC Symbol;Acc:HGNC:16909]	protein_coding	8.48277e-78	-4.58718	5.51115e-63	-0.202589	0.665687	-3.72762	2.41237e-39	4.38459	1.01489e-50	0.859558	0.0234376	-3.52504	5.0784e-31
ENSG00000081014	AP4E1	adaptor-related protein complex 4, epsilon 1 subunit [Source:HGNC Symbol;Acc:HGNC:573]	protein_coding	0.0204067	-0.0746344	0.633584	-0.413717	0.0267305	0.00457305	0.979557	-0.339083	0.0289471	0.0792075	0.732847	0.41829	0.0129275
ENSG00000081019	RSBN1	round spermatid basic protein 1 [Source:HGNC Symbol;Acc:HGNC:25642]	protein_coding	0.000849588	0.277038	0.0380807	-0.212548	0.297802	0.266546	0.0706732	-0.489585	0.000551876	-0.0104916	0.965435	0.479094	0.00204664
ENSG00000081026	MAGI3	membrane associated guanylate kinase, WW and PDZ domain containing 3 [Source:HGNC Symbol;Acc:HGNC:29647]	protein_coding	0.30536	0.0332298	0.835341	-0.147005	0.523268	0.140534	0.38879	-0.180235	0.25625	0.107304	0.619321	0.287539	0.0907275
ENSG00000081041	CXCL2	chemokine (C-X-C motif) ligand 2 [Source:HGNC Symbol;Acc:HGNC:4603]	protein_coding	0.444401	0.36733	0.280422	0.470624	0.341177	0.432289	0.2424	0.103294	0.797854	0.0649588	0.910509	-0.0383349	0.934891
ENSG00000081059	TCF7	transcription factor 7 (T-cell specific, HMG-box) [Source:HGNC Symbol;Acc:HGNC:11639]	protein_coding	0.000545861	-0.359475	0.021097	-0.287626	0.204985	-0.669091	5.75927e-05	0.0718489	0.712184	-0.309616	0.142728	-0.381465	0.0454358
ENSG00000081087	OSTM1	osteopetrosis associated transmembrane protein 1 [Source:HGNC Symbol;Acc:HGNC:21652]	protein_coding	4.8505e-18	0.876109	3.49707e-10	-0.320512	0.134371	0.672878	1.30992e-05	-1.19662	4.22087e-15	-0.203231	0.315948	0.99339	2.57564e-09
ENSG00000081154	PCNP	PEST proteolytic signal containing nuclear protein [Source:HGNC Symbol;Acc:HGNC:30023]	protein_coding	0.000606932	0.0219548	0.850835	-0.353324	0.00613305	0.0420676	0.738759	-0.375279	0.000442673	0.0201128	0.911898	0.395392	0.000709798
ENSG00000081177	EXD2	exonuclease 3'-5' domain containing 2 [Source:HGNC Symbol;Acc:HGNC:20217]	protein_coding	0.0113486	-0.244871	0.00934403	0.0143939	0.942597	0.0226509	0.852956	0.259265	0.0112314	0.267522	0.0238353	0.00825703	0.952873
ENSG00000081181	ARG2	arginase 2 [Source:HGNC Symbol;Acc:HGNC:664]	protein_coding	4.63125e-12	1.28537	5.21322e-08	-0.130556	0.781101	-0.171529	0.578995	-1.41593	3.56091e-08	-1.4569	1.607e-07	-0.0409732	0.914483
ENSG00000081189	MEF2C	myocyte enhancer factor 2C [Source:HGNC Symbol;Acc:HGNC:6996]	protein_coding	1.26175e-05	-2.24514	1.88775e-06	-0.284169	0.735231	-1.17023	0.0227266	1.96097	0.000133589	1.0749	0.0963799	-0.886066	0.127815
ENSG00000081277	PKP1	plakophilin 1 [Source:HGNC Symbol;Acc:HGNC:9023]	protein_coding	0.31009	0.54692	0.393486	-0.264968	0.820374	0.81761	0.233042	-0.811888	0.238516	0.27069	0.784911	1.08258	0.147643
ENSG00000081307	UBA5	ubiquitin-like modifier activating enzyme 5 [Source:HGNC Symbol;Acc:HGNC:23230]	protein_coding	4.33831e-18	-0.687606	1.0415e-16	-0.224895	0.0515595	-0.555224	7.18818e-10	0.462712	3.94129e-07	0.132382	0.285956	-0.330329	0.0011092
ENSG00000081320	STK17B	serine/threonine kinase 17b [Source:HGNC Symbol;Acc:HGNC:11396]	protein_coding	5.00889e-06	0.435188	0.00173647	-0.302132	0.135313	0.19208	0.240154	-0.73732	6.31538e-07	-0.243108	0.20573	0.494211	0.00305014
ENSG00000081377	CDC14B	cell division cycle 14B [Source:HGNC Symbol;Acc:HGNC:1719]	protein_coding	9.1697e-06	0.180228	0.133944	-0.0591359	0.788007	0.50782	3.42394e-05	-0.239364	0.063683	0.327592	0.0234412	0.566956	1.97305e-05
ENSG00000081386	ZNF510	zinc finger protein 510 [Source:HGNC Symbol;Acc:HGNC:29161]	protein_coding	0.0771338	-0.246216	0.0949328	0.00234794	0.99509	0.128184	0.447354	0.248564	0.121602	0.3744	0.0393435	0.125836	0.508481
ENSG00000081665	ZNF506	zinc finger protein 506 [Source:HGNC Symbol;Acc:HGNC:23780]	protein_coding	6.60959e-08	0.550874	4.64281e-07	0.130916	0.483893	0.515555	1.57577e-05	-0.419958	0.00046222	-0.0353194	0.858498	0.384639	0.00365277
ENSG00000081692	JMJD4	jumonji domain containing 4 [Source:HGNC Symbol;Acc:HGNC:25724]	protein_coding	0.00112283	-0.362674	0.00955281	-0.215794	0.315465	-0.5544	0.000230545	0.14688	0.373808	-0.191726	0.343865	-0.338606	0.0487632
ENSG00000081721	DUSP12	dual specificity phosphatase 12 [Source:HGNC Symbol;Acc:HGNC:3067]	protein_coding	0.120053	0.0114952	0.931682	-0.225693	0.17128	-0.161395	0.223246	-0.237188	0.0624229	-0.17289	0.283985	0.0642985	0.695412
ENSG00000081760	AACS	acetoacetyl-CoA synthetase [Source:HGNC Symbol;Acc:HGNC:21298]	protein_coding	3.26242e-22	-0.704196	1.33838e-13	0.154652	0.305598	-0.548675	1.40898e-07	0.858849	4.34573e-17	0.155521	0.267878	-0.703327	2.8411e-10
ENSG00000081791	KIAA0141	KIAA0141 [Source:HGNC Symbol;Acc:HGNC:28969]	protein_coding	0.105901	-0.0218404	0.780451	0.135387	0.16459	0.070245	0.382889	0.157227	0.0352658	0.0920854	0.342703	-0.0651417	0.473657
ENSG00000081803	CADPS2	Ca++-dependent secretion activator 2 [Source:HGNC Symbol;Acc:HGNC:16018]	protein_coding	0.0337579	-0.642877	0.1023	0.499073	0.388949	0.0133853	0.977462	1.14195	0.00489206	0.656262	0.2093	-0.485688	0.30835
ENSG00000081853	PCDHGA2	protocadherin gamma subfamily A, 2 [Source:HGNC Symbol;Acc:HGNC:8700]	protein_coding	0.371694	0.668823	0.115186	0.305765	0.679804	0.527502	0.269849	-0.363058	0.451295	-0.141321	0.84277	0.221737	0.701842
ENSG00000081870	HSPB11	heat shock protein family B (small), member 11 [Source:HGNC Symbol;Acc:HGNC:25019]	protein_coding	1.48074e-08	-0.444472	0.000127762	-0.0778161	0.716317	-0.677243	6.38498e-08	0.366656	0.00411793	-0.232771	0.152076	-0.599427	1.19313e-05
ENSG00000081913	PHLPP1	PH domain and leucine rich repeat protein phosphatase 1 [Source:HGNC Symbol;Acc:HGNC:20610]	protein_coding	0.00533652	0.299773	0.0275144	-0.00884387	0.97812	0.388342	0.00810026	-0.308617	0.0377188	0.0885682	0.68387	0.397185	0.0135248
ENSG00000081923	ATP8B1	ATPase, aminophospholipid transporter, class I, type 8B, member 1 [Source:HGNC Symbol;Acc:HGNC:3706]	protein_coding	0.0132575	0.163879	0.270786	-0.100812	0.694011	0.364517	0.0186635	-0.264692	0.0925283	0.200638	0.311656	0.46533	0.00531952
ENSG00000082068	WDR70	WD repeat domain 70 [Source:HGNC Symbol;Acc:HGNC:25495]	protein_coding	1.13619e-05	-0.469987	6.52212e-05	0.097431	0.639949	-0.198096	0.14616	0.567418	7.09785e-06	0.271891	0.0863721	-0.295527	0.0407844
ENSG00000082146	STRADB	STE20-related kinase adaptor beta [Source:HGNC Symbol;Acc:HGNC:13205]	protein_coding	0.00723429	0.368491	0.0127465	0.30372	0.152172	0.500981	0.00163435	-0.0647713	0.726141	0.132489	0.555891	0.19726	0.300022
ENSG00000082153	BZW1	basic leucine zipper and W2 domains 1 [Source:HGNC Symbol;Acc:HGNC:18380]	protein_coding	5.17018e-16	0.668207	1.76766e-06	-0.608274	0.000759148	0.113398	0.519444	-1.27648	9.87461e-18	-0.554809	0.00125711	0.721673	1.46662e-05
ENSG00000082196	C1QTNF3	C1q and tumor necrosis factor related protein 3 [Source:HGNC Symbol;Acc:HGNC:14326]	protein_coding	6.50212e-19	2.18802	5.47714e-14	0.685846	0.124436	2.39664	1.06957e-14	-1.50217	1.06087e-06	0.208624	0.635092	1.71079	2.16317e-07
ENSG00000082212	ME2	malic enzyme 2, NAD(+)-dependent, mitochondrial [Source:HGNC Symbol;Acc:HGNC:6984]	protein_coding	5.12644e-34	-1.19097	9.95297e-23	-0.405116	0.0125159	-1.37191	3.33141e-25	0.785854	3.99485e-09	-0.180943	0.337517	-0.966797	2.63919e-11
ENSG00000082213	C5orf22	chromosome 5 open reading frame 22 [Source:HGNC Symbol;Acc:HGNC:25639]	protein_coding	0.0472989	0.0454867	0.747119	-0.255697	0.148579	-0.203629	0.15015	-0.301183	0.0265305	-0.249116	0.131618	0.0520671	0.77471
ENSG00000082258	CCNT2	cyclin T2 [Source:HGNC Symbol;Acc:HGNC:1600]	protein_coding	0.00398492	0.20883	0.0674687	-0.214768	0.191634	0.0426113	0.764904	-0.423597	0.000388148	-0.166218	0.288797	0.257379	0.0610927
ENSG00000082269	FAM135A	family with sequence similarity 135, member A [Source:HGNC Symbol;Acc:HGNC:21084]	protein_coding	0.0030076	-0.272457	0.0433871	-0.455572	0.00809318	-0.0303952	0.860597	-0.183114	0.232261	0.242062	0.179342	0.425176	0.00723846
ENSG00000082438	COBLL1	cordon-bleu WH2 repeat protein-like 1 [Source:HGNC Symbol;Acc:HGNC:23571]	protein_coding	0.0309296	0.343839	0.05634	0.287078	0.289689	0.532242	0.00572373	-0.0567605	0.800944	0.188403	0.470056	0.245163	0.283205
ENSG00000082458	DLG3	discs, large homolog 3 (Drosophila) [Source:HGNC Symbol;Acc:HGNC:2902]	protein_coding	1.89921e-10	0.527746	3.77039e-08	-0.055239	0.767719	0.357559	0.000866228	-0.582985	2.08227e-08	-0.170187	0.211472	0.412798	0.000383645
ENSG00000082497	SERTAD4	SERTA domain containing 4 [Source:HGNC Symbol;Acc:HGNC:25236]	protein_coding	2.56233e-27	-2.68633	1.4895e-23	-0.369297	0.328044	-1.7599	8.68171e-11	2.31704	8.86158e-16	0.926434	0.0106818	-1.3906	2.8669e-06
ENSG00000082512	TRAF5	TNF receptor-associated factor 5 [Source:HGNC Symbol;Acc:HGNC:12035]	protein_coding	0.035377	-0.0974691	0.472706	-0.323137	0.0585315	-0.289851	0.0368755	-0.225668	0.107674	-0.192382	0.270526	0.0332858	0.858889
ENSG00000082515	MRPL22	mitochondrial ribosomal protein L22 [Source:HGNC Symbol;Acc:HGNC:14480]	protein_coding	0.00932781	-0.205862	0.21321	-0.0650883	0.832376	-0.536742	0.00172733	0.140774	0.453577	-0.33088	0.115884	-0.471654	0.0128883
ENSG00000082516	GEMIN5	gem (nuclear organelle) associated protein 5 [Source:HGNC Symbol;Acc:HGNC:20043]	protein_coding	4.40727e-24	-1.6184	1.14745e-21	-0.476095	0.0427027	-1.30595	1.13501e-12	1.14231	7.59509e-10	0.312454	0.208147	-0.829853	4.96841e-05
ENSG00000082641	NFE2L1	nuclear factor, erythroid 2-like 1 [Source:HGNC Symbol;Acc:HGNC:7781]	protein_coding	7.96569e-13	0.552101	4.11776e-12	0.0657695	0.658315	0.315876	0.000416583	-0.486332	2.22912e-08	-0.236225	0.0235113	0.250107	0.0122887
ENSG00000082701	GSK3B	glycogen synthase kinase 3 beta [Source:HGNC Symbol;Acc:HGNC:4617]	protein_coding	2.88009e-06	0.314429	0.00105755	-0.180538	0.212308	-0.0577298	0.635309	-0.494967	1.3569e-06	-0.372159	0.00138017	0.122808	0.337521
ENSG00000082781	ITGB5	integrin, beta 5 [Source:HGNC Symbol;Acc:HGNC:6160]	protein_coding	9.98353e-06	0.452656	0.000490798	-0.187193	0.372288	0.249318	0.0958785	-0.639849	4.34391e-06	-0.203339	0.270066	0.436511	0.00548199
ENSG00000082805	ERC1	ELKS/RAB6-interacting/CAST family member 1 [Source:HGNC Symbol;Acc:HGNC:17072]	protein_coding	0.00333595	-0.225833	0.0531716	0.155864	0.375752	0.141072	0.281657	0.381696	0.00173281	0.366905	0.00888398	-0.0147916	0.929887
ENSG00000082898	XPO1	exportin 1 [Source:HGNC Symbol;Acc:HGNC:12825]	protein_coding	4.33563e-15	-0.883201	2.52833e-13	-0.326467	0.0590839	-0.813895	7.10655e-10	0.556734	3.1845e-05	0.0693065	0.741157	-0.487428	0.0010084
ENSG00000082996	RNF13	ring finger protein 13 [Source:HGNC Symbol;Acc:HGNC:10057]	protein_coding	3.16029e-07	0.344605	0.00040179	-0.224632	0.110856	0.140984	0.220747	-0.569236	4.46201e-08	-0.203621	0.121474	0.365616	0.00180761
ENSG00000083093	PALB2	partner and localizer of BRCA2 [Source:HGNC Symbol;Acc:HGNC:26144]	protein_coding	6.21564e-05	-0.39716	0.000195406	-0.391068	0.00485609	-0.410425	0.000434789	0.00609269	0.9677	-0.0132648	0.948301	-0.0193575	0.907697
ENSG00000083097	DOPEY1	dopey family member 1 [Source:HGNC Symbol;Acc:HGNC:21194]	protein_coding	2.26187e-10	0.391816	1.37499e-05	-0.0311042	0.86647	0.497589	2.79488e-07	-0.42292	1.5538e-05	0.105773	0.431277	0.528693	4.97926e-07
ENSG00000083099	LYRM2	LYR motif containing 2 [Source:HGNC Symbol;Acc:HGNC:25229]	protein_coding	0.41101	-0.0420369	0.712358	-0.171299	0.256008	-0.0810951	0.504763	-0.129262	0.264892	-0.0390582	0.821881	0.0902039	0.507655
ENSG00000083123	BCKDHB	branched chain keto acid dehydrogenase E1, beta polypeptide [Source:HGNC Symbol;Acc:HGNC:987]	protein_coding	9.10907e-07	-0.611056	5.91674e-07	-0.0288056	0.911003	-0.287012	0.0390034	0.58225	1.21616e-05	0.324044	0.0462491	-0.258206	0.0950838
ENSG00000083168	KAT6A	K(lysine) acetyltransferase 6A [Source:HGNC Symbol;Acc:HGNC:13013]	protein_coding	0.0328204	0.191288	0.164214	-0.200786	0.330925	0.115544	0.468527	-0.392074	0.00614501	-0.0757442	0.728246	0.31633	0.0502856
ENSG00000083223	ZCCHC6	zinc finger, CCHC domain containing 6 [Source:HGNC Symbol;Acc:HGNC:25817]	protein_coding	9.01989e-18	0.770947	1.86342e-11	-0.181744	0.336045	0.549413	1.6337e-05	-0.952691	1.79088e-14	-0.221534	0.169411	0.731157	9.29058e-08
ENSG00000083307	GRHL2	grainyhead-like 2 (Drosophila) [Source:HGNC Symbol;Acc:HGNC:2799]	protein_coding	3.20127e-06	-0.414136	9.84894e-05	0.125272	0.479779	0.0283956	0.840013	0.539408	2.23685e-06	0.442532	0.00057534	-0.096876	0.507655
ENSG00000083312	TNPO1	transportin 1 [Source:HGNC Symbol;Acc:HGNC:6401]	protein_coding	0.0061863	-0.305114	0.0359491	-0.462315	0.0142376	-0.402321	0.0107128	-0.1572	0.351253	-0.0972063	0.676263	0.059994	0.776357
ENSG00000083444	PLOD1	procollagen-lysine, 2-oxoglutarate 5-dioxygenase 1 [Source:HGNC Symbol;Acc:HGNC:9081]	protein_coding	0.00337078	-0.0700722	0.662523	0.129664	0.600633	-0.435306	0.00521129	0.199737	0.222208	-0.365234	0.0451263	-0.56497	0.000719794
ENSG00000083454	P2RX5	purinergic receptor P2X, ligand gated ion channel, 5 [Source:HGNC Symbol;Acc:HGNC:8536]	protein_coding	3.25485e-16	-1.78985	1.21284e-07	-0.631143	0.175409	-3.24228	1.28776e-13	1.15871	0.00216444	-1.45243	0.00775699	-2.61114	2.87387e-08
ENSG00000083457	ITGAE	integrin, alpha E (antigen CD103, human mucosal lymphocyte antigen 1; alpha polypeptide) [Source:HGNC Symbol;Acc:HGNC:6147]	protein_coding	0.668299	-0.075764	0.724954	0.00319901	0.994981	-0.221658	0.319094	0.078963	0.739772	-0.145894	0.628335	-0.224857	0.365245
ENSG00000083520	DIS3	DIS3 exosome endoribonuclease and 3'-5' exoribonuclease [Source:HGNC Symbol;Acc:HGNC:20604]	protein_coding	0.0296404	-0.0261498	0.856272	-0.356929	0.0303064	-0.083248	0.583259	-0.330779	0.0140885	-0.0570982	0.783944	0.273681	0.071589
ENSG00000083535	PIBF1	progesterone immunomodulatory binding factor 1 [Source:HGNC Symbol;Acc:HGNC:23352]	protein_coding	0.062213	0.200023	0.184505	-0.199919	0.383762	0.0908559	0.610889	-0.399941	0.0112794	-0.109167	0.633168	0.290774	0.106578
ENSG00000083544	TDRD3	tudor domain containing 3 [Source:HGNC Symbol;Acc:HGNC:20612]	protein_coding	0.490492	-0.166075	0.491365	0.168874	0.659028	-0.100866	0.716419	0.334949	0.178361	0.065209	0.870666	-0.26974	0.344264
ENSG00000083635	NUFIP1	nuclear fragile X mental retardation protein interacting protein 1 [Source:HGNC Symbol;Acc:HGNC:8057]	protein_coding	2.10793e-19	-1.3733	5.1407e-16	-0.562169	0.00934142	-1.29673	1.36671e-12	0.811129	1.76014e-05	0.0765713	0.81209	-0.734558	0.000377492
ENSG00000083642	PDS5B	PDS5 cohesin associated factor B [Source:HGNC Symbol;Acc:HGNC:20418]	protein_coding	0.01466	-0.355224	0.00380138	-0.214139	0.244874	-0.309272	0.0231219	0.141085	0.329466	0.0459522	0.831796	-0.0951326	0.576609
ENSG00000083720	OXCT1	3-oxoacid CoA transferase 1 [Source:HGNC Symbol;Acc:HGNC:8527]	protein_coding	1.69176e-34	-1.4314	1.28944e-20	-0.0165708	0.962598	-1.52276	9.68502e-20	1.41483	1.25477e-17	-0.0913679	0.745398	-1.50619	5.45231e-17
ENSG00000083750	RRAGB	Ras-related GTP binding B [Source:HGNC Symbol;Acc:HGNC:19901]	protein_coding	0.005824	0.206665	0.131268	-0.0518798	0.841215	0.389774	0.00643241	-0.258545	0.079658	0.183109	0.325466	0.441653	0.00448281
ENSG00000083799	CYLD	cylindromatosis (turban tumor syndrome) [Source:HGNC Symbol;Acc:HGNC:2584]	protein_coding	1.66927e-05	0.336023	0.00515435	0.139945	0.481294	0.579612	4.87608e-06	-0.196078	0.149794	0.243589	0.125333	0.439667	0.00175756
ENSG00000083807	SLC27A5	solute carrier family 27 (fatty acid transporter), member 5 [Source:HGNC Symbol;Acc:HGNC:10999]	protein_coding	5.99723e-06	-0.68001	0.0218718	0.488081	0.234421	0.746279	0.0130325	1.16809	0.000130909	1.42629	1.53763e-05	0.258199	0.478023
ENSG00000083812	ZNF324	zinc finger protein 324 [Source:HGNC Symbol;Acc:HGNC:14096]	protein_coding	0.00214459	0.383452	0.0100156	0.024236	0.939474	0.461598	0.00400036	-0.359216	0.0276916	0.0781464	0.7496	0.437362	0.013258
ENSG00000083817	ZNF416	zinc finger protein 416 [Source:HGNC Symbol;Acc:HGNC:20645]	protein_coding	0.00969155	0.361639	0.0152495	0.271151	0.211732	0.484542	0.00227067	-0.0904883	0.614606	0.122902	0.58731	0.213391	0.251044
ENSG00000083828	ZNF586	zinc finger protein 586 [Source:HGNC Symbol;Acc:HGNC:25949]	protein_coding	5.17152e-06	-0.650816	5.10989e-05	-0.0193933	0.955967	-0.582975	0.000887663	0.631423	0.000281799	0.0678413	0.817355	-0.563581	0.00317341
ENSG00000083838	ZNF446	zinc finger protein 446 [Source:HGNC Symbol;Acc:HGNC:21036]	protein_coding	7.62039e-08	0.398048	0.000533391	0.468697	0.00096562	0.674353	1.40121e-08	0.0706489	0.610017	0.276305	0.0575966	0.205656	0.13761
ENSG00000083844	ZNF264	zinc finger protein 264 [Source:HGNC Symbol;Acc:HGNC:13057]	protein_coding	0.00193797	0.455253	0.0110998	-0.213312	0.472478	0.25124	0.227603	-0.668566	0.000499998	-0.204013	0.436271	0.464552	0.0333055
ENSG00000083845	RPS5	ribosomal protein S5 [Source:HGNC Symbol;Acc:HGNC:10426]	protein_coding	3.84052e-12	-0.838545	4.20837e-09	0.00990772	0.97768	-0.735586	2.78727e-06	0.848453	4.48932e-08	0.102959	0.666972	-0.745493	1.27878e-05
ENSG00000083857	FAT1	FAT atypical cadherin 1 [Source:HGNC Symbol;Acc:HGNC:3595]	protein_coding	0.000935412	-0.365844	0.0187256	-0.639031	0.00101529	-0.321744	0.0643635	-0.273187	0.117112	0.0441002	0.873864	0.317287	0.0993412
ENSG00000083896	YTHDC1	YTH domain containing 1 [Source:HGNC Symbol;Acc:HGNC:30626]	protein_coding	0.477304	0.0608163	0.566318	-0.0782815	0.644119	-0.0626722	0.597544	-0.139098	0.20513	-0.123489	0.370404	0.0156093	0.914731
ENSG00000083937	CHMP2B	charged multivesicular body protein 2B [Source:HGNC Symbol;Acc:HGNC:24537]	protein_coding	8.53539e-09	0.358708	0.00656116	-0.515933	0.00220104	0.126164	0.427538	-0.87464	2.46525e-10	-0.232544	0.19803	0.642097	2.86834e-05
ENSG00000084070	SMAP2	small ArfGAP2 [Source:HGNC Symbol;Acc:HGNC:25082]	protein_coding	0.000337788	-0.121306	0.326037	0.199362	0.245283	-0.332116	0.00898709	0.320669	0.0103193	-0.210809	0.185193	-0.531478	6.92017e-05
ENSG00000084072	PPIE	peptidylprolyl isomerase E (cyclophilin E) [Source:HGNC Symbol;Acc:HGNC:9258]	protein_coding	0.027025	-0.206347	0.0531973	0.103803	0.552539	0.0222164	0.87053	0.31015	0.00599554	0.228564	0.0970862	-0.0815865	0.566948
ENSG00000084073	ZMPSTE24	zinc metallopeptidase STE24 [Source:HGNC Symbol;Acc:HGNC:12877]	protein_coding	0.00120921	-0.217735	0.0986991	-0.445233	0.00734962	-0.437667	0.00161577	-0.227497	0.115565	-0.219932	0.212404	0.00756543	0.969726
ENSG00000084090	STARD7	StAR-related lipid transfer (START) domain containing 7 [Source:HGNC Symbol;Acc:HGNC:18063]	protein_coding	1.05976e-16	-0.64783	3.95087e-14	-0.24395	0.0440548	-0.625329	2.2051e-11	0.403881	2.10223e-05	0.0225016	0.890287	-0.381379	0.000263321
ENSG00000084092	NOA1	nitric oxide associated 1 [Source:HGNC Symbol;Acc:HGNC:28473]	protein_coding	0.0288927	-0.256449	0.0216422	0.0437203	0.838869	0.0019726	0.988907	0.300169	0.0126248	0.258422	0.0731879	-0.0417477	0.796387
ENSG00000084093	REST	RE1-silencing transcription factor [Source:HGNC Symbol;Acc:HGNC:9966]	protein_coding	0.0434642	-0.16774	0.275595	-0.390972	0.047562	-0.00352629	0.985366	-0.223232	0.178202	0.164214	0.44059	0.387446	0.0276573
ENSG00000084110	HAL	histidine ammonia-lyase [Source:HGNC Symbol;Acc:HGNC:4806]	protein_coding	5.44869e-93	3.73289	4.892e-60	-0.664982	0.0997374	2.45604	1.00609e-22	-4.39787	8.67514e-60	-1.27685	1.63414e-07	3.12102	5.58085e-27
ENSG00000084112	SSH1	slingshot protein phosphatase 1 [Source:HGNC Symbol;Acc:HGNC:30579]	protein_coding	3.44945e-06	-0.210706	0.143904	-0.685995	4.62579e-05	-0.536083	0.000332186	-0.475289	0.00150259	-0.325378	0.0721346	0.149911	0.421435
ENSG00000084207	GSTP1	glutathione S-transferase pi 1 [Source:HGNC Symbol;Acc:HGNC:4638]	protein_coding	8.18702e-23	-0.673328	9.02683e-12	0.207698	0.164516	-0.625286	7.27153e-09	0.881026	1.21594e-16	0.0480417	0.783006	-0.832985	6.61051e-13
ENSG00000084234	APLP2	amyloid beta (A4) precursor-like protein 2 [Source:HGNC Symbol;Acc:HGNC:598]	protein_coding	7.569e-09	0.742507	8.56682e-07	-0.153144	0.564892	0.385457	0.0255669	-0.895651	3.85227e-08	-0.35705	0.0785543	0.538601	0.003514
ENSG00000084444	KIAA1467	KIAA1467 [Source:HGNC Symbol;Acc:HGNC:29288]	protein_coding	0.540262	-0.277888	0.192047	-0.061615	0.879507	-0.134956	0.587506	0.216273	0.365091	0.142932	0.665349	-0.0733409	0.80536
ENSG00000084463	WBP11	WW domain binding protein 11 [Source:HGNC Symbol;Acc:HGNC:16461]	protein_coding	0.0615294	-0.125446	0.240278	-0.136337	0.398288	-0.286635	0.00995703	-0.0108907	0.936908	-0.161188	0.254598	-0.150298	0.248954
ENSG00000084623	EIF3I	eukaryotic translation initiation factor 3, subunit I [Source:HGNC Symbol;Acc:HGNC:3272]	protein_coding	1.09614e-07	-0.280353	0.0200368	-0.0853716	0.695179	-0.709449	1.7862e-08	0.194981	0.15078	-0.429096	0.00308374	-0.624077	6.09286e-06
ENSG00000084636	COL16A1	collagen, type XVI, alpha 1 [Source:HGNC Symbol;Acc:HGNC:2193]	protein_coding	0.000111985	-0.276713	0.600455	1.28869	0.0200429	1.27668	0.00556956	1.56541	0.00090602	1.55339	0.00381274	-0.0120137	0.983966
ENSG00000084652	TXLNA	taxilin alpha [Source:HGNC Symbol;Acc:HGNC:30685]	protein_coding	0.499754	-0.0565764	0.577528	-0.0975755	0.524396	-0.139084	0.187945	-0.0409992	0.721678	-0.0825079	0.557967	-0.0415087	0.755721
ENSG00000084676	NCOA1	nuclear receptor coactivator 1 [Source:HGNC Symbol;Acc:HGNC:7668]	protein_coding	3.43463e-07	0.344289	0.00116532	0.242558	0.108352	0.616366	3.65585e-08	-0.101731	0.422884	0.272077	0.0453036	0.373808	0.00288977
ENSG00000084693	AGBL5	ATP/GTP binding protein-like 5 [Source:HGNC Symbol;Acc:HGNC:26147]	protein_coding	2.03058e-08	-0.381125	0.0015116	0.378153	0.0163676	0.0844367	0.569072	0.759278	1.57256e-09	0.465562	0.00131714	-0.293716	0.044143
ENSG00000084731	KIF3C	kinesin family member 3C [Source:HGNC Symbol;Acc:HGNC:6321]	protein_coding	0.043565	-0.648601	0.0344662	-0.0892893	0.881512	-0.680325	0.0436686	0.559312	0.0983794	-0.0317239	0.956595	-0.591036	0.116394
ENSG00000084733	RAB10	RAB10, member RAS oncogene family [Source:HGNC Symbol;Acc:HGNC:9759]	protein_coding	3.048e-18	0.247411	0.00506436	-0.473384	8.56951e-06	-0.396338	2.88289e-05	-0.720796	4.35634e-15	-0.643749	5.05e-11	0.0770469	0.527286
ENSG00000084754	HADHA	hydroxyacyl-CoA dehydrogenase/3-ketoacyl-CoA thiolase/enoyl-CoA hydratase (trifunctional protein), alpha subunit [Source:HGNC Symbol;Acc:HGNC:4801]	protein_coding	0.00425089	0.255332	0.00545033	0.0826245	0.608689	0.292037	0.00362824	-0.172707	0.0946612	0.0367056	0.817579	0.209413	0.0649201
ENSG00000084764	MAPRE3	microtubule-associated protein, RP/EB family, member 3 [Source:HGNC Symbol;Acc:HGNC:6892]	protein_coding	0.150834	-0.0906076	0.648294	0.00202722	0.996872	0.309089	0.122366	0.0926348	0.674175	0.399696	0.0822197	0.307062	0.166378
ENSG00000084774	CAD	carbamoyl-phosphate synthetase 2, aspartate transcarbamylase, and dihydroorotase [Source:HGNC Symbol;Acc:HGNC:1424]	protein_coding	2.19399e-67	-2.09091	1.13107e-49	-0.302942	0.157059	-1.97289	5.56954e-38	1.78796	1.7973e-31	0.118013	0.620277	-1.66995	7.33036e-24
ENSG00000085063	CD59	CD59 molecule, complement regulatory protein [Source:HGNC Symbol;Acc:HGNC:1689]	protein_coding	6.34095e-10	0.987744	2.68947e-07	-0.24195	0.458336	0.333247	0.14318	-1.22969	2.9741e-09	-0.654497	0.00700119	0.575197	0.016276
ENSG00000085117	CD82	CD82 molecule [Source:HGNC Symbol;Acc:HGNC:6210]	protein_coding	1.77093e-44	0.971524	1.93494e-32	0.0451413	0.783593	0.799771	4.14697e-19	-0.926383	2.0823e-25	-0.171753	0.136857	0.75463	7.72865e-15
ENSG00000085185	BCORL1	BCL6 corepressor-like 1 [Source:HGNC Symbol;Acc:HGNC:25657]	protein_coding	0.0278871	-0.146959	0.377539	0.231288	0.333218	0.267833	0.125144	0.378247	0.0252602	0.414792	0.0336765	0.0365447	0.873078
ENSG00000085224	ATRX	alpha thalassemia/mental retardation syndrome X-linked [Source:HGNC Symbol;Acc:HGNC:886]	protein_coding	0.000267702	-0.540936	0.000287659	-0.420847	0.0404885	-0.555277	0.000700815	0.120089	0.512437	-0.0143409	0.959359	-0.13443	0.51708
ENSG00000085231	TAF9	TAF9 RNA polymerase II, TATA box binding protein (TBP)-associated factor, 32kDa [Source:HGNC Symbol;Acc:HGNC:11542]	protein_coding	0.00022074	-0.501036	0.000106508	-0.0122541	0.967148	-0.248318	0.091506	0.488782	0.000500136	0.252719	0.159852	-0.236063	0.148183
ENSG00000085274	MYNN	myoneurin [Source:HGNC Symbol;Acc:HGNC:14955]	protein_coding	0.0773433	-0.104964	0.285882	-0.189669	0.153305	0.0489292	0.672371	-0.0847052	0.444244	0.153893	0.229187	0.238599	0.033004
ENSG00000085276	MECOM	MDS1 and EVI1 complex locus [Source:HGNC Symbol;Acc:HGNC:3498]	protein_coding	1.41545e-48	-2.09052	6.14336e-37	-0.00508781	0.990452	-1.62465	9.3026e-20	2.08543	9.37391e-32	0.465862	0.0373852	-1.61957	4.40113e-17
ENSG00000085365	SCAMP1	secretory carrier membrane protein 1 [Source:HGNC Symbol;Acc:HGNC:10563]	protein_coding	0.0430378	-0.0841722	0.677338	-0.368927	0.153993	0.191815	0.365735	-0.284755	0.162472	0.275987	0.269437	0.560742	0.00878537
ENSG00000085377	PREP	prolyl endopeptidase [Source:HGNC Symbol;Acc:HGNC:9358]	protein_coding	0.384838	-0.0224572	0.878428	-0.121078	0.567426	-0.201907	0.156376	-0.098621	0.509252	-0.17945	0.305829	-0.0808287	0.645043
ENSG00000085382	HACE1	HECT domain and ankyrin repeat containing E3 ubiquitin protein ligase 1 [Source:HGNC Symbol;Acc:HGNC:21033]	protein_coding	1.44537e-06	-1.36274	1.76037e-06	0.111214	0.835885	-0.287328	0.384974	1.47396	1.37858e-06	1.07542	0.00241197	-0.398541	0.264084
ENSG00000085415	SEH1L	SEH1-like (S. cerevisiae) [Source:HGNC Symbol;Acc:HGNC:30379]	protein_coding	6.29395e-28	-0.976642	1.3243e-16	-0.529158	0.000451969	-1.31923	1.39547e-24	0.447483	0.000789099	-0.342591	0.0348799	-0.790074	3.19851e-08
ENSG00000085433	WDR47	WD repeat domain 47 [Source:HGNC Symbol;Acc:HGNC:29141]	protein_coding	5.69993e-09	0.709239	3.68047e-06	-0.207774	0.422818	0.477801	0.00558463	-0.917013	3.45334e-08	-0.231438	0.292033	0.685575	0.000210338
ENSG00000085449	WDFY1	WD repeat and FYVE domain containing 1 [Source:HGNC Symbol;Acc:HGNC:20451]	protein_coding	0.155739	-0.163971	0.244361	-0.217547	0.287953	0.0649063	0.700905	-0.0535762	0.751546	0.228877	0.210708	0.282453	0.0875861
ENSG00000085465	OVGP1	oviductal glycoprotein 1, 120kDa [Source:HGNC Symbol;Acc:HGNC:8524]	protein_coding	0.000183629	0.575522	0.0715075	0.817822	0.0488217	1.36269	2.30164e-05	0.2423	0.505731	0.787172	0.0388524	0.544872	0.142602
ENSG00000085491	SLC25A24	solute carrier family 25 (mitochondrial carrier; phosphate carrier), member 24 [Source:HGNC Symbol;Acc:HGNC:20662]	protein_coding	4.38109e-07	0.467869	0.0113015	-0.629042	0.00899311	-0.0650552	0.784336	-1.09691	1.39129e-08	-0.532924	0.0209355	0.563986	0.0110938
ENSG00000085511	MAP3K4	mitogen-activated protein kinase kinase kinase 4 [Source:HGNC Symbol;Acc:HGNC:6856]	protein_coding	0.224962	-0.256757	0.0752201	-0.0595665	0.826421	-0.00973769	0.957761	0.19719	0.222244	0.247019	0.19928	0.0498288	0.810316
ENSG00000085514	PILRA	paired immunoglobin-like type 2 receptor alpha [Source:HGNC Symbol;Acc:HGNC:20396]	protein_coding	0.00417622	-0.564118	0.0166222	0.284839	0.436193	-0.00453435	0.987959	0.848957	0.000603886	0.559584	0.065313	-0.289373	0.328932
ENSG00000085552	IGSF9	immunoglobulin superfamily, member 9 [Source:HGNC Symbol;Acc:HGNC:18132]	protein_coding	0.0194664	0.601093	0.0730046	0.548395	0.271534	1.06197	0.00280457	-0.0526975	0.903966	0.460878	0.319287	0.513576	0.219549
ENSG00000085563	ABCB1	ATP-binding cassette, sub-family B (MDR/TAP), member 1 [Source:HGNC Symbol;Acc:HGNC:40]	protein_coding	5.79444e-09	1.94279	9.31116e-06	-0.93541	0.207215	1.06227	0.0361207	-2.8782	1.17924e-08	-0.880524	0.129821	1.99768	0.00040048
ENSG00000085644	ZNF213	zinc finger protein 213 [Source:HGNC Symbol;Acc:HGNC:13005]	protein_coding	6.24484e-06	0.539713	8.20754e-07	0.238363	0.139639	0.401263	0.000977606	-0.30135	0.0134014	-0.138449	0.391594	0.1629	0.257357
ENSG00000085662	AKR1B1	aldo-keto reductase family 1, member B1 (aldose reductase) [Source:HGNC Symbol;Acc:HGNC:381]	protein_coding	1.37483e-11	-1.30409	4.7122e-08	0.0445999	0.93068	-1.27974	9.50207e-07	1.34869	1.82883e-07	0.0243539	0.958344	-1.32434	2.85026e-06
ENSG00000085719	CPNE3	copine III [Source:HGNC Symbol;Acc:HGNC:2316]	protein_coding	0.0816396	-0.219715	0.06734	-0.283345	0.0825065	-0.0954457	0.503266	-0.0636303	0.663892	0.124269	0.475261	0.187899	0.209575
ENSG00000085721	RRN3	RRN3 RNA polymerase I transcription factor homolog (S. cerevisiae) [Source:HGNC Symbol;Acc:HGNC:30346]	protein_coding	5.94082e-15	-0.690384	1.90778e-10	-0.331611	0.0269693	-0.849869	5.0367e-13	0.358773	0.00329097	-0.159485	0.324041	-0.518258	7.90316e-05
ENSG00000085733	CTTN	cortactin [Source:HGNC Symbol;Acc:HGNC:3338]	protein_coding	4.96583e-73	0.78207	7.23039e-51	-0.0794671	0.36682	0.460114	1.17287e-15	-0.861538	1.33554e-52	-0.321957	2.28218e-07	0.539581	2.54506e-18
ENSG00000085741	WNT11	wingless-type MMTV integration site family, member 11 [Source:HGNC Symbol;Acc:HGNC:12776]	protein_coding	0.0843552	-1.93826	0.0141226	-0.771783	0.538981	-1.02107	0.244408	1.16648	0.196564	0.917191	0.433364	-0.249285	0.825776
ENSG00000085760	MTIF2	mitochondrial translational initiation factor 2 [Source:HGNC Symbol;Acc:HGNC:7441]	protein_coding	5.58523e-17	-0.815277	9.7947e-13	-0.174974	0.345737	-0.833118	2.22083e-11	0.640303	3.21258e-07	-0.017841	0.936091	-0.658144	1.5028e-06
ENSG00000085788	DDHD2	DDHD domain containing 2 [Source:HGNC Symbol;Acc:HGNC:29106]	protein_coding	0.349854	-0.134218	0.299524	-0.217214	0.232287	-0.0612793	0.689639	-0.0829953	0.576744	0.0729391	0.715569	0.155934	0.327349
ENSG00000085831	TTC39A	tetratricopeptide repeat domain 39A [Source:HGNC Symbol;Acc:HGNC:18657]	protein_coding	9.09884e-14	1.58625	5.33758e-11	0.392647	0.318073	1.66683	2.45868e-10	-1.1936	7.17278e-06	0.0805778	0.856552	1.27418	1.12495e-05
ENSG00000085832	EPS15	epidermal growth factor receptor pathway substrate 15 [Source:HGNC Symbol;Acc:HGNC:3419]	protein_coding	2.67682e-10	0.418034	1.57555e-05	-0.262563	0.0551507	0.177414	0.117639	-0.680597	5.51641e-11	-0.240621	0.0607049	0.439976	0.000152563
ENSG00000085840	ORC1	origin recognition complex, subunit 1 [Source:HGNC Symbol;Acc:HGNC:8487]	protein_coding	2.36711e-138	-4.58063	1.86732e-73	-0.213529	0.474905	-4.16141	1.89269e-60	4.3671	7.01698e-62	0.419219	0.341905	-3.94788	3.94482e-50
ENSG00000085871	MGST2	microsomal glutathione S-transferase 2 [Source:HGNC Symbol;Acc:HGNC:7063]	protein_coding	1.55403e-10	-0.68798	1.5359e-08	-0.22137	0.239245	-0.725155	4.55585e-08	0.46661	0.000546513	-0.037175	0.870861	-0.503785	0.000651658
ENSG00000085872	CHERP	calcium homeostasis endoplasmic reticulum protein [Source:HGNC Symbol;Acc:HGNC:16930]	protein_coding	0.00899027	-0.140673	0.192537	-0.0630719	0.739651	-0.355562	0.00147119	0.0776007	0.533718	-0.21489	0.118675	-0.29249	0.0188204
ENSG00000085978	ATG16L1	autophagy related 16-like 1 (S. cerevisiae) [Source:HGNC Symbol;Acc:HGNC:21498]	protein_coding	1.35549e-11	0.315439	0.038193	-0.77105	2.20911e-05	-0.376647	0.0237908	-1.08649	3.68534e-12	-0.692086	7.59667e-05	0.394403	0.0313945
ENSG00000085982	USP40	ubiquitin specific peptidase 40 [Source:HGNC Symbol;Acc:HGNC:20069]	protein_coding	0.740248	-0.0628922	0.58909	0.0388107	0.850588	-0.0650379	0.61667	0.101703	0.411722	-0.00214569	0.991834	-0.103849	0.459427
ENSG00000085998	POMGNT1	protein O-linked mannose N-acetylglucosaminyltransferase 1 (beta 1,2-) [Source:HGNC Symbol;Acc:HGNC:19139]	protein_coding	5.78482e-09	-0.402864	0.00275626	-0.215203	0.303139	-0.896679	3.29577e-10	0.187661	0.229616	-0.493815	0.00282081	-0.681476	1.49573e-05
ENSG00000085999	RAD54L	RAD54-like (S. cerevisiae) [Source:HGNC Symbol;Acc:HGNC:9826]	protein_coding	3.02642e-54	-2.52224	6.07446e-39	-0.0797209	0.82313	-2.04853	7.56996e-24	2.44252	2.88786e-32	0.473707	0.0931884	-1.96881	1.65162e-19
ENSG00000086015	MAST2	microtubule associated serine/threonine kinase 2 [Source:HGNC Symbol;Acc:HGNC:19035]	protein_coding	9.59718e-42	1.13445	1.41666e-23	0.262011	0.125316	1.44369	3.38797e-32	-0.872442	1.78133e-12	0.309234	0.0405373	1.18168	5.08001e-19
ENSG00000086061	DNAJA1	DnaJ (Hsp40) homolog, subfamily A, member 1 [Source:HGNC Symbol;Acc:HGNC:5229]	protein_coding	0.00192497	0.00523926	0.970453	-0.350652	0.0277233	-0.321641	0.0142247	-0.355891	0.00583884	-0.32688	0.0296245	0.0290105	0.871193
ENSG00000086062	B4GALT1	UDP-Gal:betaGlcNAc beta 1,4- galactosyltransferase, polypeptide 1 [Source:HGNC Symbol;Acc:HGNC:924]	protein_coding	1.5272e-17	0.87202	1.00787e-11	-0.234775	0.245666	0.425003	0.0035506	-1.10679	1.26738e-15	-0.447017	0.00618542	0.659777	1.99354e-05
ENSG00000086065	CHMP5	charged multivesicular body protein 5 [Source:HGNC Symbol;Acc:HGNC:26942]	protein_coding	1.81675e-23	0.937872	1.83961e-15	-0.114172	0.596501	0.768751	2.87564e-09	-1.05204	1.86323e-16	-0.169121	0.333998	0.882922	2.80459e-10
ENSG00000086102	NFX1	nuclear transcription factor, X-box binding 1 [Source:HGNC Symbol;Acc:HGNC:7803]	protein_coding	1.76007e-10	0.432269	7.59224e-08	0.025357	0.881512	0.417193	2.04312e-06	-0.406912	3.45039e-06	-0.0150758	0.920936	0.391836	4.5069e-05
ENSG00000086159	AQP6	aquaporin 6, kidney specific [Source:HGNC Symbol;Acc:HGNC:639]	protein_coding	4.86341e-05	-2.36123	0.000224471	0.383265	0.703254	-1.27747	0.0540435	2.74449	4.55468e-05	1.08376	0.243684	-1.66073	0.0180742
ENSG00000086189	DIMT1	DIM1 dimethyladenosine transferase 1 homolog (S. cerevisiae) [Source:HGNC Symbol;Acc:HGNC:30217]	protein_coding	3.25971e-17	-1.06919	7.09395e-13	-0.689353	0.000231872	-1.19883	1.54836e-13	0.379835	0.027988	-0.129643	0.607655	-0.509478	0.00661507
ENSG00000086200	IPO11	importin 11 [Source:HGNC Symbol;Acc:HGNC:20628]	protein_coding	3.30877e-25	-1.05738	4.18007e-21	-0.328238	0.0314788	-0.940816	9.27883e-15	0.729139	3.22843e-09	0.11656	0.525614	-0.612579	5.41449e-06
ENSG00000086232	EIF2AK1	eukaryotic translation initiation factor 2-alpha kinase 1 [Source:HGNC Symbol;Acc:HGNC:24921]	protein_coding	4.3911e-12	0.359212	1.0003e-08	0.0513021	0.658691	0.381399	2.30527e-08	-0.30791	7.32497e-06	0.022187	0.846433	0.330097	1.02731e-05
ENSG00000086289	EPDR1	ependymin related 1 [Source:HGNC Symbol;Acc:HGNC:17572]	protein_coding	0.546659	0.0899873	0.39602	0.0478959	0.797321	-0.0512795	0.679207	-0.0420913	0.734041	-0.141267	0.310455	-0.0991754	0.452223
ENSG00000086475	SEPHS1	selenophosphate synthetase 1 [Source:HGNC Symbol;Acc:HGNC:19685]	protein_coding	2.7727e-15	-0.654969	1.67326e-10	-0.15068	0.363243	-0.748848	1.82333e-11	0.504288	7.61216e-06	-0.0938791	0.576356	-0.598167	9.95602e-07
ENSG00000086504	MRPL28	mitochondrial ribosomal protein L28 [Source:HGNC Symbol;Acc:HGNC:14484]	protein_coding	0.062791	0.133822	0.299975	0.150312	0.445682	-0.165839	0.241746	0.0164901	0.919069	-0.29966	0.0562294	-0.316151	0.031981
ENSG00000086544	ITPKC	inositol-trisphosphate 3-kinase C [Source:HGNC Symbol;Acc:HGNC:14897]	protein_coding	5.05236e-76	1.29655	3.98748e-55	0.286015	0.0148219	1.26914	1.08318e-45	-1.01054	1.52019e-29	-0.0274161	0.857054	0.983123	2.19142e-24
ENSG00000086548	CEACAM6	carcinoembryonic antigen-related cell adhesion molecule 6 (non-specific cross reacting antigen) [Source:HGNC Symbol;Acc:HGNC:1818]	protein_coding	0.27006	0.144242	0.492382	-0.197104	0.545557	-0.173297	0.454681	-0.341346	0.114676	-0.317539	0.231034	0.0238067	0.934132
ENSG00000086589	RBM22	RNA binding motif protein 22 [Source:HGNC Symbol;Acc:HGNC:25503]	protein_coding	0.463791	0.111264	0.152658	0.0769905	0.538671	0.0416226	0.656243	-0.0342739	0.713891	-0.0696418	0.541675	-0.0353679	0.743765
ENSG00000086598	TMED2	transmembrane emp24 domain trafficking protein 2 [Source:HGNC Symbol;Acc:HGNC:16996]	protein_coding	0.111101	0.123408	0.120415	-0.0558893	0.688979	-0.0160051	0.874226	-0.179298	0.0342629	-0.139413	0.181557	0.0398842	0.718385
ENSG00000086666	ZFAND6	zinc finger, AN1-type domain 6 [Source:HGNC Symbol;Acc:HGNC:30164]	protein_coding	5.88715e-09	0.553415	6.7754e-07	-0.119866	0.53922	0.251854	0.0509679	-0.673281	2.27996e-08	-0.301561	0.0388654	0.371721	0.00689731
ENSG00000086696	HSD17B2	hydroxysteroid (17-beta) dehydrogenase 2 [Source:HGNC Symbol;Acc:HGNC:5211]	protein_coding	5.73747e-15	1.27932	9.87112e-13	0.372351	0.17534	1.24711	1.77825e-10	-0.906969	4.09517e-06	-0.0322153	0.924663	0.874754	5.12711e-05
ENSG00000086712	TXLNG	taxilin gamma [Source:HGNC Symbol;Acc:HGNC:18578]	protein_coding	1.38906e-08	-0.568491	1.79008e-07	-0.318113	0.03379	-0.606014	3.28446e-07	0.250378	0.0451255	-0.0375232	0.85271	-0.287902	0.0358087
ENSG00000086730	LAT2	linker for activation of T cells family, member 2 [Source:HGNC Symbol;Acc:HGNC:12749]	protein_coding	6.9158e-72	1.55163	3.80836e-30	-1.15389	5.48233e-12	0.656481	1.97475e-05	-2.70552	1.61114e-72	-0.895149	2.08371e-08	1.81037	1.63917e-28
ENSG00000086758	HUWE1	HECT, UBA and WWE domain containing 1, E3 ubiquitin protein ligase [Source:HGNC Symbol;Acc:HGNC:30892]	protein_coding	0.198551	-0.112413	0.244511	-0.0583207	0.730461	-0.199299	0.0519515	0.0540927	0.632305	-0.0868853	0.531634	-0.140978	0.229613
ENSG00000086827	ZW10	zw10 kinetochore protein [Source:HGNC Symbol;Acc:HGNC:13194]	protein_coding	7.51199e-13	-0.651108	1.62343e-09	-0.176762	0.298081	-0.718023	9.62599e-10	0.474346	6.8227e-05	-0.0669154	0.722618	-0.541262	2.98494e-05
ENSG00000086848	ALG9	ALG9, alpha-1,2-mannosyltransferase [Source:HGNC Symbol;Acc:HGNC:15672]	protein_coding	1.97726e-14	-0.703333	4.69035e-14	-0.124227	0.410581	-0.43584	1.93518e-05	0.579106	1.22007e-08	0.267492	0.0330993	-0.311614	0.00631309
ENSG00000087008	ACOX3	acyl-CoA oxidase 3, pristanoyl [Source:HGNC Symbol;Acc:HGNC:121]	protein_coding	0.0001458	0.270499	0.0873426	0.278901	0.217095	0.695329	1.52216e-05	0.00840208	0.968088	0.42483	0.0257419	0.416428	0.0216315
ENSG00000087053	MTMR2	myotubularin related protein 2 [Source:HGNC Symbol;Acc:HGNC:7450]	protein_coding	3.09639e-08	-0.398039	0.000179763	-0.354174	0.0120213	-0.667709	4.80189e-09	0.0438651	0.750197	-0.26967	0.0563203	-0.313535	0.0170531
ENSG00000087074	PPP1R15A	protein phosphatase 1, regulatory subunit 15A [Source:HGNC Symbol;Acc:HGNC:14375]	protein_coding	3.32547e-33	1.57286	1.66217e-26	0.0168861	0.962716	0.912577	2.58359e-08	-1.55597	2.7295e-22	-0.660282	0.000295847	0.895691	5.26638e-07
ENSG00000087077	TRIP6	thyroid hormone receptor interactor 6 [Source:HGNC Symbol;Acc:HGNC:12311]	protein_coding	2.55041e-10	-0.52525	6.12913e-07	0.184493	0.261006	-0.266688	0.0267208	0.709743	3.47846e-10	0.258562	0.0669056	-0.451181	0.000367698
ENSG00000087085	ACHE	acetylcholinesterase (Yt blood group) [Source:HGNC Symbol;Acc:HGNC:108]	protein_coding	5.94744e-31	5.17263	6.40657e-31	1.40607	0.0277961	5.06211	1.33255e-25	-3.76656	2.99932e-15	-0.110522	0.893867	3.65604	1.80404e-12
ENSG00000087086	FTL	ferritin, light polypeptide [Source:HGNC Symbol;Acc:HGNC:3999]	protein_coding	0.0268115	-0.0933354	0.633584	0.402889	0.102307	0.227945	0.263953	0.496225	0.00900846	0.32128	0.174769	-0.174944	0.457015
ENSG00000087087	SRRT	serrate, RNA effector molecule [Source:HGNC Symbol;Acc:HGNC:24101]	protein_coding	4.60096e-11	-0.391003	6.67492e-05	0.0405851	0.836328	-0.598438	1.37067e-08	0.431588	4.93751e-05	-0.207435	0.120662	-0.639023	2.17056e-08
ENSG00000087088	BAX	BCL2-associated X protein [Source:HGNC Symbol;Acc:HGNC:959]	protein_coding	0.155514	0.22008	0.140103	-0.0453208	0.876867	-0.0762659	0.673804	-0.265401	0.0996679	-0.296346	0.120582	-0.0309451	0.886257
ENSG00000087095	NLK	nemo-like kinase [Source:HGNC Symbol;Acc:HGNC:29858]	protein_coding	0.100224	0.130381	0.393004	-0.165406	0.478383	0.192391	0.239792	-0.295788	0.0608771	0.0620097	0.796837	0.357798	0.0371885
ENSG00000087111	PIGS	phosphatidylinositol glycan anchor biosynthesis, class S [Source:HGNC Symbol;Acc:HGNC:14937]	protein_coding	1.18074e-05	0.356103	1.59366e-05	0.0403718	0.803488	0.269601	0.00343689	-0.315731	0.000484178	-0.0865024	0.493523	0.229229	0.0252712
ENSG00000087116	ADAMTS2	ADAM metallopeptidase with thrombospondin type 1 motif, 2 [Source:HGNC Symbol;Acc:HGNC:218]	protein_coding	0.00413474	1.09956	0.0280834	-0.339347	0.726495	1.22483	0.0230191	-1.4389	0.00937519	0.125279	0.882955	1.56418	0.00894668
ENSG00000087128	TMPRSS11E	transmembrane protease, serine 11E [Source:HGNC Symbol;Acc:HGNC:24465]	protein_coding	1.0041e-08	-1.02138	3.25957e-05	-0.389082	0.313566	-1.54242	7.94359e-09	0.632295	0.0222446	-0.521043	0.130302	-1.15334	9.61454e-05
ENSG00000087152	ATXN7L3	ataxin 7-like 3 [Source:HGNC Symbol;Acc:HGNC:25416]	protein_coding	3.29298e-34	0.620026	3.31965e-22	-0.147554	0.129032	0.316055	1.06109e-05	-0.767581	1.62699e-28	-0.303971	0.000103176	0.463609	1.56178e-09
ENSG00000087157	PGS1	phosphatidylglycerophosphate synthase 1 [Source:HGNC Symbol;Acc:HGNC:30029]	protein_coding	0.176663	0.210456	0.15275	0.0189674	0.951263	0.263431	0.098961	-0.191489	0.239097	0.0529749	0.828379	0.244464	0.16935
ENSG00000087191	PSMC5	proteasome (prosome, macropain) 26S subunit, ATPase, 5 [Source:HGNC Symbol;Acc:HGNC:9552]	protein_coding	0.0106866	-0.13916	0.257947	-0.0844847	0.688979	-0.399997	0.00151404	0.0546753	0.707938	-0.260837	0.0877453	-0.315513	0.0252946
ENSG00000087206	UIMC1	ubiquitin interaction motif containing 1 [Source:HGNC Symbol;Acc:HGNC:30298]	protein_coding	0.227043	0.069673	0.592302	-0.173037	0.343886	-0.0797967	0.58098	-0.24271	0.0627253	-0.14947	0.376723	0.0932403	0.564113
ENSG00000087253	LPCAT2	lysophosphatidylcholine acyltransferase 2 [Source:HGNC Symbol;Acc:HGNC:26032]	protein_coding	0.236878	0.784694	0.115546	0.072693	0.945752	0.704655	0.203913	-0.712001	0.194877	-0.0800392	0.92646	0.631962	0.310676
ENSG00000087258	GNAO1	guanine nucleotide binding protein (G protein), alpha activating activity polypeptide O [Source:HGNC Symbol;Acc:HGNC:4389]	protein_coding	1.75697e-07	4.07715	2.43233e-05	-0.192963	0.939628	4.03533	8.69052e-05	-4.27011	0.000112412	-0.041815	0.975757	4.2283	0.000334879
ENSG00000087263	OGFOD1	2-oxoglutarate and iron-dependent oxygenase domain containing 1 [Source:HGNC Symbol;Acc:HGNC:25585]	protein_coding	4.23346e-07	-0.424226	0.00157388	-0.286868	0.136844	-0.79247	3.46753e-08	0.137359	0.392821	-0.368244	0.0355419	-0.505603	0.00170656
ENSG00000087266	SH3BP2	SH3-domain binding protein 2 [Source:HGNC Symbol;Acc:HGNC:10825]	protein_coding	1.22029e-21	1.00204	2.67293e-16	-0.0589021	0.813495	0.670269	7.77447e-07	-1.06094	1.34169e-15	-0.331769	0.0418505	0.729171	7.142e-07
ENSG00000087269	NOP14	NOP14 nucleolar protein [Source:HGNC Symbol;Acc:HGNC:16821]	protein_coding	1.05552e-21	-1.05386	6.23496e-14	-0.472452	0.0132206	-1.34481	1.25978e-18	0.581406	0.000211218	-0.290957	0.14662	-0.872363	2.34703e-07
ENSG00000087274	ADD1	adducin 1 (alpha) [Source:HGNC Symbol;Acc:HGNC:243]	protein_coding	2.1014e-10	0.499008	1.95395e-10	0.121238	0.344671	0.349805	6.06543e-05	-0.37777	1.18644e-05	-0.149203	0.177463	0.228567	0.0203583
ENSG00000087299	L2HGDH	L-2-hydroxyglutarate dehydrogenase [Source:HGNC Symbol;Acc:HGNC:20499]	protein_coding	2.39833e-48	-1.71642	2.83015e-38	-0.264852	0.165477	-1.3928	1.00791e-22	1.45156	5.00684e-24	0.32362	0.0897673	-1.12794	2.77677e-13
ENSG00000087301	TXNDC16	thioredoxin domain containing 16 [Source:HGNC Symbol;Acc:HGNC:19965]	protein_coding	5.7904e-06	-0.946908	4.56556e-07	-0.241616	0.419498	-0.266145	0.219857	0.705293	0.000667726	0.680764	0.00399078	-0.0245288	0.931102
ENSG00000087302	C14orf166	chromosome 14 open reading frame 166 [Source:HGNC Symbol;Acc:HGNC:23169]	protein_coding	0.000552975	-0.212055	0.0287839	-0.0036844	0.987511	-0.360483	0.00048404	0.208371	0.0500104	-0.148427	0.269855	-0.356798	0.0015834
ENSG00000087338	GMCL1	germ cell-less, spermatogenesis associated 1 [Source:HGNC Symbol;Acc:HGNC:23843]	protein_coding	0.0582423	-0.333607	0.0113812	-0.246311	0.202966	-0.16164	0.293204	0.0872959	0.588458	0.171966	0.362939	0.0846705	0.648198
ENSG00000087365	SF3B2	splicing factor 3b, subunit 2, 145kDa [Source:HGNC Symbol;Acc:HGNC:10769]	protein_coding	0.044263	0.138723	0.112411	0.0348521	0.833509	-0.108705	0.272134	-0.103871	0.290261	-0.247428	0.0192568	-0.143557	0.181582
ENSG00000087448	KLHL42	kelch-like family member 42 [Source:HGNC Symbol;Acc:HGNC:29252]	protein_coding	1.61542e-08	-0.505928	5.19388e-09	-0.344806	0.00199051	-0.369917	0.000101793	0.161122	0.113737	0.136011	0.28867	-0.0251103	0.851356
ENSG00000087460	GNAS	GNAS complex locus [Source:HGNC Symbol;Acc:HGNC:4392]	protein_coding	0.282709	-0.0977066	0.393686	0.10775	0.550377	-0.0596053	0.65448	0.205457	0.0835946	0.0381013	0.837848	-0.167356	0.218011
ENSG00000087470	DNM1L	dynamin 1-like [Source:HGNC Symbol;Acc:HGNC:2973]	protein_coding	8.23868e-18	-0.719718	4.7685e-09	-0.239176	0.202443	-1.10041	1.21888e-16	0.480541	0.000430741	-0.380697	0.0181505	-0.861238	3.26049e-09
ENSG00000087494	PTHLH	parathyroid hormone-like hormone [Source:HGNC Symbol;Acc:HGNC:9607]	protein_coding	1.25954e-50	1.94244	1.24563e-26	-0.817307	0.000953239	0.316117	0.155723	-2.75974	8.78501e-44	-1.62632	6.15397e-15	1.13342	4.47801e-07
ENSG00000087495	PHACTR3	phosphatase and actin regulator 3 [Source:HGNC Symbol;Acc:HGNC:15833]	protein_coding	1.17692e-49	2.41659	6.39291e-28	-1.02022	0.000488249	0.962207	0.000117342	-3.43682	6.62007e-47	-1.45439	2.11772e-08	1.98243	5.09876e-14
ENSG00000087502	ERGIC2	ERGIC and golgi 2 [Source:HGNC Symbol;Acc:HGNC:30208]	protein_coding	0.000180267	-0.0310143	0.715334	-0.174047	0.0948692	-0.312064	9.74797e-05	-0.143033	0.0870385	-0.28105	0.00182838	-0.138017	0.1436
ENSG00000087586	AURKA	aurora kinase A [Source:HGNC Symbol;Acc:HGNC:11393]	protein_coding	4.37469e-47	-2.43127	3.45079e-32	-0.194013	0.606487	-2.51802	2.20453e-29	2.23725	1.329e-23	-0.0867493	0.819155	-2.324	7.01626e-22
ENSG00000087842	PIR	pirin (iron-binding nuclear protein) [Source:HGNC Symbol;Acc:HGNC:30048]	protein_coding	4.88605e-16	-1.63463	1.28022e-10	0.0828636	0.868953	-1.57761	1.20369e-08	1.71749	3.40868e-10	0.0570173	0.909664	-1.66047	2.51333e-08
ENSG00000087884	AAMDC	adipogenesis associated, Mth938 domain containing [Source:HGNC Symbol;Acc:HGNC:30205]	protein_coding	0.00929259	0.52406	0.00666096	0.287261	0.340925	0.596968	0.00427276	-0.236799	0.285925	0.072908	0.824926	0.309707	0.200011
ENSG00000087903	RFX2	regulatory factor X, 2 (influences HLA class II expression) [Source:HGNC Symbol;Acc:HGNC:9983]	protein_coding	0.00352144	0.00794835	0.948673	0.314764	0.0186975	0.231734	0.0425381	0.306815	0.00573617	0.223786	0.101211	-0.0830296	0.550261
ENSG00000087995	METTL2A	methyltransferase like 2A [Source:HGNC Symbol;Acc:HGNC:25755]	protein_coding	0.00139034	-0.119967	0.235839	-0.18943	0.165279	-0.391397	0.0001673	-0.069463	0.553126	-0.27143	0.0301917	-0.201967	0.0944656
ENSG00000088002	SULT2B1	sulfotransferase family, cytosolic, 2B, member 1 [Source:HGNC Symbol;Acc:HGNC:11459]	protein_coding	0.000146125	0.551553	0.00157353	-0.177677	0.555	-0.0051433	0.981924	-0.729231	0.000103929	-0.556697	0.0104874	0.172534	0.470515
ENSG00000088035	ALG6	ALG6, alpha-1,3-glucosyltransferase [Source:HGNC Symbol;Acc:HGNC:23157]	protein_coding	8.05336e-27	-1.03357	3.30923e-21	-0.300877	0.0377863	-0.957841	4.14484e-16	0.732696	9.78907e-10	0.0757323	0.7017	-0.656964	4.40632e-07
ENSG00000088038	CNOT3	CCR4-NOT transcription complex, subunit 3 [Source:HGNC Symbol;Acc:HGNC:7879]	protein_coding	0.00962664	0.288372	0.00115967	0.196375	0.122377	0.167236	0.10089	-0.0919968	0.383099	-0.121136	0.344103	-0.0291393	0.826471
ENSG00000088179	PTPN4	protein tyrosine phosphatase, non-receptor type 4 (megakaryocyte) [Source:HGNC Symbol;Acc:HGNC:9656]	protein_coding	0.0010509	-0.319987	0.000810916	-0.321374	0.0100493	-0.255999	0.0158188	-0.00138671	0.991475	0.0639879	0.687742	0.0653746	0.631707
ENSG00000088205	DDX18	DEAD (Asp-Glu-Ala-Asp) box polypeptide 18 [Source:HGNC Symbol;Acc:HGNC:2741]	protein_coding	6.74499e-21	-0.716589	4.35909e-14	-0.550919	2.70714e-06	-0.881927	1.0394e-17	0.16567	0.141516	-0.165338	0.231794	-0.331008	0.00523609
ENSG00000088247	KHSRP	KH-type splicing regulatory protein [Source:HGNC Symbol;Acc:HGNC:6316]	protein_coding	2.96863e-42	-0.789988	1.56642e-27	-0.170146	0.111782	-0.870414	2.38964e-28	0.619842	5.28277e-15	-0.0804261	0.488143	-0.700268	3.12748e-16
ENSG00000088256	GNA11	guanine nucleotide binding protein (G protein), alpha 11 (Gq class) [Source:HGNC Symbol;Acc:HGNC:4379]	protein_coding	1.45405e-09	0.543058	2.10993e-07	0.185918	0.256604	0.625148	3.68005e-08	-0.35714	0.00214657	0.0820901	0.630192	0.43923	0.000500951
ENSG00000088280	ASAP3	ArfGAP with SH3 domain, ankyrin repeat and PH domain 3 [Source:HGNC Symbol;Acc:HGNC:14987]	protein_coding	1.11128e-10	0.212211	0.400174	0.962501	0.00098188	1.45367	2.30253e-09	0.75029	0.00278263	1.24146	2.69053e-06	0.491169	0.0871773
ENSG00000088298	EDEM2	ER degradation enhancer, mannosidase alpha-like 2 [Source:HGNC Symbol;Acc:HGNC:15877]	protein_coding	0.00588548	0.27293	0.00158936	0.196471	0.111066	0.0613576	0.569992	-0.0764595	0.462428	-0.211573	0.061215	-0.135113	0.22663
ENSG00000088305	DNMT3B	DNA (cytosine-5-)-methyltransferase 3 beta [Source:HGNC Symbol;Acc:HGNC:2979]	protein_coding	1.28702e-23	-2.26562	7.60499e-17	0.26095	0.528066	-1.42942	3.18089e-07	2.52657	1.3779e-18	0.836201	0.0243513	-1.69037	1.31036e-08
ENSG00000088325	TPX2	TPX2, microtubule-associated [Source:HGNC Symbol;Acc:HGNC:1249]	protein_coding	4.5171e-30	-3.3604	2.54286e-23	-0.301633	0.630524	-3.38823	3.02967e-20	3.05876	8.15781e-17	-0.0278358	0.966192	-3.0866	1.01397e-14
ENSG00000088340	FER1L4	fer-1-like family member 4, pseudogene (functional) [Source:HGNC Symbol;Acc:HGNC:15801]	unitary_pseudogene	5.42298e-21	1.08474	1.64566e-14	0.0499538	0.866207	1.06062	6.12316e-12	-1.03479	1.7187e-11	-0.024121	0.929697	1.01066	1.72898e-09
ENSG00000088356	PDRG1	p53 and DNA-damage regulated 1 [Source:HGNC Symbol;Acc:HGNC:16119]	protein_coding	0.142546	-0.250762	0.0400975	-0.0339643	0.889433	-0.143137	0.309285	0.216798	0.108411	0.107625	0.562719	-0.109172	0.501358
ENSG00000088367	EPB41L1	erythrocyte membrane protein band 4.1-like 1 [Source:HGNC Symbol;Acc:HGNC:3378]	protein_coding	7.32201e-07	0.325949	7.01995e-05	-0.0958254	0.491832	0.22672	0.0140808	-0.421774	1.77783e-06	-0.0992285	0.416851	0.322546	0.00105921
ENSG00000088386	SLC15A1	solute carrier family 15 (oligopeptide transporter), member 1 [Source:HGNC Symbol;Acc:HGNC:10920]	protein_coding	2.37526e-11	0.665502	0.000101552	-0.651183	0.00400082	0.193752	0.351263	-1.31669	5.35157e-13	-0.471751	0.0330204	0.844935	3.37724e-05
ENSG00000088387	DOCK9	dedicator of cytokinesis 9 [Source:HGNC Symbol;Acc:HGNC:14132]	protein_coding	0.00186527	0.2262	0.137096	-0.334278	0.107644	-0.166227	0.339061	-0.560478	0.000355506	-0.392426	0.0351822	0.168052	0.390023
ENSG00000088448	ANKRD10	ankyrin repeat domain 10 [Source:HGNC Symbol;Acc:HGNC:20265]	protein_coding	2.70333e-24	1.00563	4.5865e-16	-0.12563	0.580239	0.807273	2.81423e-09	-1.13126	4.10784e-17	-0.198361	0.268132	0.932904	2.32216e-10
ENSG00000088451	TGDS	TDP-glucose 4,6-dehydratase [Source:HGNC Symbol;Acc:HGNC:20324]	protein_coding	0.195695	0.0494245	0.823386	-0.325339	0.261095	-0.221651	0.327117	-0.374764	0.0811585	-0.271076	0.321969	0.103688	0.708289
ENSG00000088538	DOCK3	dedicator of cytokinesis 3 [Source:HGNC Symbol;Acc:HGNC:2989]	protein_coding	0.383172	-0.0609256	0.896326	0.454786	0.457673	0.454909	0.304695	0.515711	0.239994	0.515835	0.346254	0.000123951	0.99975
ENSG00000088543	C3orf18	chromosome 3 open reading frame 18 [Source:HGNC Symbol;Acc:HGNC:24837]	protein_coding	0.393491	-0.52782	0.496622	0.688196	0.532947	0.080732	0.928708	1.21602	0.115669	0.608552	0.577915	-0.607464	0.498149
ENSG00000088682	COQ9	coenzyme Q9 [Source:HGNC Symbol;Acc:HGNC:25302]	protein_coding	0.00504665	-0.271092	0.0577327	0.0946896	0.711249	-0.365418	0.0179923	0.365781	0.0166173	-0.0943262	0.679282	-0.460107	0.00566254
ENSG00000088726	TMEM40	transmembrane protein 40 [Source:HGNC Symbol;Acc:HGNC:25620]	protein_coding	0.129036	-0.823902	0.14868	0.301083	0.752189	-0.714262	0.258103	1.12499	0.0602022	0.10964	0.915836	-1.01535	0.12891
ENSG00000088727	KIF9	kinesin family member 9 [Source:HGNC Symbol;Acc:HGNC:16666]	protein_coding	1.22111e-07	-0.998558	4.07564e-07	-0.176538	0.602759	-0.822305	0.000134016	0.82202	0.000141777	0.176253	0.586163	-0.645767	0.00703244
ENSG00000088766	CRLS1	cardiolipin synthase 1 [Source:HGNC Symbol;Acc:HGNC:16148]	protein_coding	1.55845e-24	-1.08372	9.87185e-19	-0.242725	0.195552	-1.0524	3.15415e-15	0.840995	3.6008e-10	0.0313257	0.895374	-0.80967	3.1983e-08
ENSG00000088808	PPP1R13B	protein phosphatase 1, regulatory subunit 13B [Source:HGNC Symbol;Acc:HGNC:14950]	protein_coding	0.000204059	0.293185	0.00154681	0.372642	0.001537	0.336752	0.000832406	0.0794568	0.476382	0.0435672	0.782899	-0.0358895	0.794026
ENSG00000088812	ATRN	attractin [Source:HGNC Symbol;Acc:HGNC:885]	protein_coding	5.84592e-07	-0.563583	7.16101e-07	-0.0335263	0.888792	-0.0382369	0.799516	0.530057	1.94787e-05	0.525346	0.000126423	-0.00471058	0.979439
ENSG00000088826	SMOX	spermine oxidase [Source:HGNC Symbol;Acc:HGNC:15862]	protein_coding	2.27981e-44	1.15074	3.83241e-20	-0.649247	5.58137e-05	-0.00138149	0.99356	-1.79999	1.68969e-40	-1.15213	7.0066e-16	0.647865	2.42389e-05
ENSG00000088832	FKBP1A	FK506 binding protein 1A, 12kDa [Source:HGNC Symbol;Acc:HGNC:3711]	protein_coding	0.0380559	0.119141	0.194225	-0.0590096	0.714331	-0.133809	0.186332	-0.17815	0.0681838	-0.252949	0.0210841	-0.0747992	0.533828
ENSG00000088833	NSFL1C	NSFL1 (p97) cofactor (p47) [Source:HGNC Symbol;Acc:HGNC:15912]	protein_coding	0.163601	0.0812294	0.460221	0.148817	0.347536	-0.0881185	0.471195	0.0675871	0.584144	-0.169348	0.224266	-0.236935	0.0559592
ENSG00000088836	SLC4A11	solute carrier family 4, sodium borate transporter, member 11 [Source:HGNC Symbol;Acc:HGNC:16438]	protein_coding	6.32389e-17	1.38132	6.52154e-15	0.350473	0.20311	1.23463	1.98475e-10	-1.03084	1.15275e-07	-0.146686	0.613989	0.884158	3.84675e-05
ENSG00000088854	C20orf194	chromosome 20 open reading frame 194 [Source:HGNC Symbol;Acc:HGNC:17721]	protein_coding	0.204885	-0.87939	0.147345	0.281878	0.777253	0.159308	0.818831	1.16127	0.0671785	1.0387	0.186059	-0.122569	0.87755
ENSG00000088876	ZNF343	zinc finger protein 343 [Source:HGNC Symbol;Acc:HGNC:16017]	protein_coding	4.47504e-10	-0.594724	3.77118e-09	-0.0327379	0.871917	-0.392316	0.000406545	0.561986	2.74762e-07	0.202408	0.158492	-0.359578	0.00313226
ENSG00000088881	EBF4	early B-cell factor 4 [Source:HGNC Symbol;Acc:HGNC:29278]	protein_coding	3.07611e-13	1.13443	3.21351e-05	1.47597	8.61277e-06	2.198	1.76632e-14	0.341538	0.28308	1.06357	0.00108612	0.722032	0.0285286
ENSG00000088888	MAVS	mitochondrial antiviral signaling protein [Source:HGNC Symbol;Acc:HGNC:29233]	protein_coding	0.0221883	0.144924	0.15068	0.0249126	0.900541	0.283555	0.00750898	-0.120011	0.286101	0.138631	0.311135	0.258642	0.0276189
ENSG00000088899		Leucine zipper putative tumor suppressor 3 [Source:UniProtKB/Swiss-Prot;Acc:O60299]	protein_coding	2.01727e-09	0.958149	1.17326e-06	0.758282	0.00362623	1.33707	3.15652e-10	-0.199867	0.406529	0.378916	0.166963	0.578783	0.0181943
ENSG00000088930	XRN2	5'-3' exoribonuclease 2 [Source:HGNC Symbol;Acc:HGNC:12836]	protein_coding	2.0803e-08	-0.348473	5.03188e-05	-0.290928	0.0112163	-0.539601	5.12953e-09	0.0575451	0.593694	-0.191128	0.100193	-0.248673	0.0194785
ENSG00000088970	KIZ	kizuna centrosomal protein [Source:HGNC Symbol;Acc:HGNC:15865]	protein_coding	5.57034e-11	-0.433983	0.0433117	0.750787	0.00500014	0.877474	7.64534e-05	1.18477	6.52346e-08	1.31146	2.08371e-08	0.126688	0.665819
ENSG00000088986	DYNLL1	dynein, light chain, LC8-type 1 [Source:HGNC Symbol;Acc:HGNC:15476]	protein_coding	4.27068e-06	0.481729	1.52281e-06	0.0757109	0.686837	0.249673	0.0296427	-0.406018	0.00022736	-0.232056	0.0858705	0.173962	0.185286
ENSG00000088992	TESC	tescalcin [Source:HGNC Symbol;Acc:HGNC:26065]	protein_coding	9.44067e-08	0.704086	0.000173524	-0.108544	0.762516	-0.355459	0.102431	-0.812631	6.3391e-05	-1.05955	1.04134e-06	-0.246915	0.325035
ENSG00000089006	SNX5	sorting nexin 5 [Source:HGNC Symbol;Acc:HGNC:14969]	protein_coding	1.01558e-29	-1.0147	2.26119e-25	-0.191349	0.2069	-0.801765	5.46689e-14	0.82335	9.71728e-15	0.212935	0.119905	-0.610416	1.87763e-07
ENSG00000089009	RPL6	ribosomal protein L6 [Source:HGNC Symbol;Acc:HGNC:10362]	protein_coding	8.09547e-12	-0.672955	9.68662e-07	-0.0506384	0.857576	-0.887478	2.32635e-09	0.622317	3.46628e-05	-0.214523	0.280577	-0.83684	2.38785e-07
ENSG00000089022	MAPKAPK5	mitogen-activated protein kinase-activated protein kinase 5 [Source:HGNC Symbol;Acc:HGNC:6889]	protein_coding	0.000643766	-0.196487	0.0054024	-0.188244	0.0489773	-0.283396	0.000190293	0.00824238	0.932159	-0.0869089	0.402612	-0.0951513	0.303331
ENSG00000089048	ESF1	ESF1, nucleolar pre-rRNA processing protein, homolog (S. cerevisiae) [Source:HGNC Symbol;Acc:HGNC:15898]	protein_coding	2.61336e-13	-0.711476	4.70205e-09	-0.435591	0.00712859	-0.919572	3.09922e-12	0.275885	0.0493318	-0.208097	0.241972	-0.483982	0.00117454
ENSG00000089050	RBBP9	retinoblastoma binding protein 9 [Source:HGNC Symbol;Acc:HGNC:9892]	protein_coding	2.68841e-44	-1.48388	1.3575e-37	0.0480108	0.835767	-0.69816	2.75863e-08	1.53189	9.54695e-35	0.785718	1.21974e-08	-0.746171	3.88108e-08
ENSG00000089053	ANAPC5	anaphase promoting complex subunit 5 [Source:HGNC Symbol;Acc:HGNC:15713]	protein_coding	1.03107e-19	-0.524261	1.25572e-16	0.0165753	0.903305	-0.271692	0.000124628	0.540837	3.15105e-15	0.252569	0.00152391	-0.288268	0.000178382
ENSG00000089057	SLC23A2	solute carrier family 23 (ascorbic acid transporter), member 2 [Source:HGNC Symbol;Acc:HGNC:10973]	protein_coding	9.02512e-06	-0.582163	5.37663e-07	-0.20811	0.244325	-0.293829	0.0261246	0.374053	0.00391872	0.288334	0.0643491	-0.0857195	0.606879
ENSG00000089060	SLC8B1	solute carrier family 8 (sodium/lithium/calcium exchanger), member B1 [Source:HGNC Symbol;Acc:HGNC:26175]	protein_coding	0.817636	-0.0422451	0.67375	0.0349108	0.840272	-0.0412799	0.713471	0.0771558	0.466407	0.000965167	0.996366	-0.0761907	0.528654
ENSG00000089063	TMEM230	transmembrane protein 230 [Source:HGNC Symbol;Acc:HGNC:15876]	protein_coding	0.634886	0.0654964	0.520911	0.0310531	0.86675	-0.0573374	0.619719	-0.0344433	0.770901	-0.122834	0.354608	-0.0883905	0.481534
ENSG00000089091	DZANK1	double zinc ribbon and ankyrin repeat domains 1 [Source:HGNC Symbol;Acc:HGNC:15858]	protein_coding	0.00490047	-0.0574234	0.762054	0.399287	0.0659728	0.383277	0.0304486	0.456711	0.00913067	0.4407	0.0324084	-0.0160105	0.945855
ENSG00000089094	KDM2B	lysine (K)-specific demethylase 2B [Source:HGNC Symbol;Acc:HGNC:13610]	protein_coding	4.38249e-12	-1.00087	4.49353e-10	-0.220277	0.396037	-0.934979	9.20804e-08	0.780592	9.54083e-06	0.0658894	0.823234	-0.714702	0.000224049
ENSG00000089101	CFAP61	cilia and flagella associated protein 61 [Source:HGNC Symbol;Acc:HGNC:15872]	protein_coding	0.000343586	-2.43398	0.00177381	0.552173	0.617609	-1.28421	0.102946	2.98615	0.000223409	1.14976	0.317082	-1.83639	0.0253985
ENSG00000089123	TASP1	taspase, threonine aspartase, 1 [Source:HGNC Symbol;Acc:HGNC:15859]	protein_coding	0.0521267	-0.107946	0.343142	-0.28914	0.0436747	-0.201626	0.0940251	-0.181194	0.134375	-0.0936803	0.573135	0.0875141	0.55221
ENSG00000089127	OAS1	2'-5'-oligoadenylate synthetase 1, 40/46kDa [Source:HGNC Symbol;Acc:HGNC:8086]	protein_coding	1.21035e-13	0.902035	1.10755e-09	-0.0454186	0.885765	0.803642	7.82541e-07	-0.947453	3.78731e-09	-0.0983925	0.694596	0.849061	1.53211e-06
ENSG00000089154	GCN1L1	GCN1 general control of amino-acid synthesis 1-like 1 (yeast) [Source:HGNC Symbol;Acc:HGNC:4199]	protein_coding	7.75804e-09	-0.282772	1.76037e-06	-0.216439	0.00588883	-0.363608	1.35303e-08	0.0663334	0.355243	-0.0808356	0.356003	-0.147169	0.0488333
ENSG00000089157	RPLP0	ribosomal protein, large, P0 [Source:HGNC Symbol;Acc:HGNC:10371]	protein_coding	7.15501e-11	-0.517024	4.34342e-07	0.0761631	0.692317	-0.48345	1.73776e-05	0.593188	8.44309e-08	0.0335749	0.858093	-0.559613	4.11682e-06
ENSG00000089159	PXN	paxillin [Source:HGNC Symbol;Acc:HGNC:9718]	protein_coding	1.04446e-56	0.879181	1.38687e-32	-0.305277	0.00215734	0.304443	0.000295193	-1.18446	7.64932e-50	-0.574738	2.38385e-11	0.609719	5.03052e-12
ENSG00000089163	SIRT4	sirtuin 4 [Source:HGNC Symbol;Acc:HGNC:14932]	protein_coding	0.00664476	0.662424	0.11361	0.506484	0.434721	1.37674	0.00102988	-0.15594	0.754189	0.714317	0.165838	0.870257	0.0617881
ENSG00000089177	KIF16B	kinesin family member 16B [Source:HGNC Symbol;Acc:HGNC:15869]	protein_coding	0.0784664	-0.0917588	0.574422	-0.0443131	0.882786	0.278624	0.0936863	0.0474457	0.800837	0.370383	0.0493338	0.322937	0.0745607
ENSG00000089195	TRMT6	tRNA methyltransferase 6 [Source:HGNC Symbol;Acc:HGNC:20900]	protein_coding	3.68999e-09	-0.335086	0.00966446	-0.447763	0.00755022	-0.870849	1.62934e-10	-0.112677	0.468201	-0.535763	0.000544871	-0.423086	0.0065953
ENSG00000089199	CHGB	chromogranin B (secretogranin 1) [Source:HGNC Symbol;Acc:HGNC:1930]	protein_coding	0.00104885	0.866773	0.0228693	-0.250206	0.730996	-0.653113	0.174726	-1.11698	0.0075354	-1.51989	0.00194485	-0.402908	0.476414
ENSG00000089220	PEBP1	phosphatidylethanolamine binding protein 1 [Source:HGNC Symbol;Acc:HGNC:8630]	protein_coding	9.57668e-31	-1.19831	1.68208e-24	-0.0417432	0.864103	-0.874628	9.05146e-12	1.15657	8.90256e-20	0.323681	0.0409555	-0.832885	2.2982e-09
ENSG00000089234	BRAP	BRCA1 associated protein [Source:HGNC Symbol;Acc:HGNC:1099]	protein_coding	0.00669651	0.242622	0.007618	-0.0531504	0.753864	0.0462882	0.687853	-0.295773	0.00258309	-0.196334	0.102709	0.0994386	0.414169
ENSG00000089248	ERP29	endoplasmic reticulum protein 29 [Source:HGNC Symbol;Acc:HGNC:13799]	protein_coding	1.39612e-12	-0.615104	1.601e-07	0.190489	0.309641	-0.494053	0.00014362	0.805594	1.76603e-10	0.121052	0.508346	-0.684542	8.13817e-07
ENSG00000089280	FUS	FUS RNA binding protein [Source:HGNC Symbol;Acc:HGNC:4010]	protein_coding	3.9114e-32	-0.699696	2.89601e-20	-0.116966	0.349713	-0.789404	8.99241e-22	0.582729	1.91201e-12	-0.0897081	0.444997	-0.672437	6.05078e-14
ENSG00000089289	IGBP1	immunoglobulin (CD79A) binding protein 1 [Source:HGNC Symbol;Acc:HGNC:5461]	protein_coding	5.11174e-22	0.744291	3.47529e-15	0.139908	0.374768	0.80388	4.69629e-15	-0.604383	4.90054e-09	0.0595895	0.712284	0.663972	3.19089e-09
ENSG00000089327	FXYD5	FXYD domain containing ion transport regulator 5 [Source:HGNC Symbol;Acc:HGNC:4029]	protein_coding	0.000122993	0.600911	8.61179e-05	0.15845	0.551111	0.0311017	0.880741	-0.442462	0.00927675	-0.56981	0.00247485	-0.127348	0.5552
ENSG00000089335	ZNF302	zinc finger protein 302 [Source:HGNC Symbol;Acc:HGNC:13848]	protein_coding	0.00871369	-0.299097	0.00527717	-0.019305	0.930754	0.021961	0.874775	0.279792	0.0170628	0.321058	0.0167216	0.041266	0.792042
ENSG00000089351	GRAMD1A	GRAM domain containing 1A [Source:HGNC Symbol;Acc:HGNC:29305]	protein_coding	7.86114e-26	-2.63023	5.95217e-22	-0.0268284	0.967162	-1.89803	1.64503e-10	2.6034	1.18953e-18	0.732197	0.0488293	-1.8712	6.42824e-09
ENSG00000089356	FXYD3	FXYD domain containing ion transport regulator 3 [Source:HGNC Symbol;Acc:HGNC:4027]	protein_coding	1.67299e-25	1.49269	2.73884e-22	0.32427	0.168887	1.23168	2.54116e-13	-1.16842	3.48366e-12	-0.261006	0.243929	0.907414	9.86213e-07
ENSG00000089472	HEPH	hephaestin [Source:HGNC Symbol;Acc:HGNC:4866]	protein_coding	9.434e-11	1.02858	6.97576e-08	-0.0401386	0.923578	0.934677	8.47865e-06	-1.06872	2.52782e-07	-0.0939061	0.779061	0.974816	1.94199e-05
ENSG00000089486	CDIP1	cell death-inducing p53 target 1 [Source:HGNC Symbol;Acc:HGNC:13234]	protein_coding	3.8424e-11	1.07844	1.82113e-10	0.569461	0.0139311	1.08825	3.11125e-09	-0.508976	0.00697077	0.00981215	0.974389	0.518788	0.012685
ENSG00000089505	CMTM1	CKLF-like MARVEL transmembrane domain containing 1 [Source:HGNC Symbol;Acc:HGNC:19172]	protein_coding	0.00514788	0.774657	0.0464106	-0.517992	0.430057	-0.326689	0.508694	-1.29265	0.00255182	-1.10135	0.0284425	0.191303	0.752366
ENSG00000089597	GANAB	glucosidase, alpha; neutral AB [Source:HGNC Symbol;Acc:HGNC:4138]	protein_coding	8.49666e-11	-0.357277	1.08027e-07	0.0168192	0.907625	-0.328659	8.7401e-06	0.374096	3.00155e-07	0.0286185	0.810782	-0.345478	1.68712e-05
ENSG00000089639	GMIP	GEM interacting protein [Source:HGNC Symbol;Acc:HGNC:24852]	protein_coding	3.86687e-10	0.545075	2.61765e-08	-0.061381	0.746455	0.133394	0.262749	-0.606456	1.13456e-08	-0.411681	0.000623536	0.194775	0.128062
ENSG00000089682	RBM41	RNA binding motif protein 41 [Source:HGNC Symbol;Acc:HGNC:25617]	protein_coding	0.0475005	-0.0480968	0.733688	-0.344584	0.0394556	-0.144409	0.322008	-0.296487	0.029847	-0.0963123	0.621724	0.200175	0.205606
ENSG00000089685	BIRC5	baculoviral IAP repeat containing 5 [Source:HGNC Symbol;Acc:HGNC:593]	protein_coding	8.69444e-13	-4.07963	3.11467e-11	-0.136863	0.91774	-3.93498	4.60816e-09	3.94276	3.60681e-09	0.144643	0.902765	-3.79812	2.00661e-07
ENSG00000089692	LAG3	lymphocyte-activation gene 3 [Source:HGNC Symbol;Acc:HGNC:6476]	protein_coding	0.168409	-0.474162	0.283194	0.475967	0.464634	0.0453834	0.932618	0.950129	0.0348452	0.519545	0.386426	-0.430584	0.418996
ENSG00000089693	MLF2	myeloid leukemia factor 2 [Source:HGNC Symbol;Acc:HGNC:7126]	protein_coding	0.721505	0.0923205	0.435406	0.0910943	0.636618	0.000500443	0.99723	-0.0012262	0.993045	-0.0918201	0.587208	-0.0905939	0.545646
ENSG00000089723	OTUB2	OTU deubiquitinase, ubiquitin aldehyde binding 2 [Source:HGNC Symbol;Acc:HGNC:20351]	protein_coding	9.11158e-07	0.313262	0.209529	-0.624269	0.0566973	-0.937176	0.000288514	-0.937532	0.000234336	-1.25044	5.47272e-06	-0.312907	0.32191
ENSG00000089737	DDX24	DEAD (Asp-Glu-Ala-Asp) box helicase 24 [Source:HGNC Symbol;Acc:HGNC:13266]	protein_coding	0.0163634	-0.0257167	0.803406	-0.217613	0.0802871	-0.229285	0.0203849	-0.191896	0.053294	-0.203568	0.0815079	-0.0116725	0.931313
ENSG00000089775	ZBTB25	zinc finger and BTB domain containing 25 [Source:HGNC Symbol;Acc:HGNC:13112]	protein_coding	9.52889e-06	-0.61979	7.04422e-07	-0.176262	0.368934	-0.262432	0.0629752	0.443528	0.00134855	0.357357	0.0300148	-0.0861706	0.62637
ENSG00000089818	NECAP1	NECAP endocytosis associated 1 [Source:HGNC Symbol;Acc:HGNC:24539]	protein_coding	8.99602e-06	0.388862	7.29724e-05	-0.0825869	0.643037	0.0962087	0.425626	-0.471449	8.76295e-06	-0.292654	0.0196958	0.178796	0.159768
ENSG00000089820	ARHGAP4	Rho GTPase activating protein 4 [Source:HGNC Symbol;Acc:HGNC:674]	protein_coding	3.78528e-05	-0.112963	0.333155	-0.0372971	0.86419	-0.51579	8.95247e-06	0.0756663	0.569497	-0.402826	0.00216975	-0.478493	0.000168542
ENSG00000089847	ANKRD24	ankyrin repeat domain 24 [Source:HGNC Symbol;Acc:HGNC:29424]	protein_coding	0.00236897	0.876083	0.00501689	0.604564	0.184707	1.14438	0.000527627	-0.271519	0.453505	0.268296	0.559396	0.539814	0.151691
ENSG00000089876	DHX32	DEAH (Asp-Glu-Ala-His) box polypeptide 32 [Source:HGNC Symbol;Acc:HGNC:16717]	protein_coding	2.42941e-34	0.883623	8.57912e-20	-0.334565	0.0131356	0.310193	0.00553486	-1.21819	3.43076e-31	-0.573431	6.61715e-07	0.644758	3.45135e-08
ENSG00000089902	RCOR1	REST corepressor 1 [Source:HGNC Symbol;Acc:HGNC:17441]	protein_coding	2.28788e-05	0.245557	0.034914	-0.34085	0.0267165	-0.0464984	0.750806	-0.586407	1.25872e-06	-0.292055	0.046932	0.294352	0.0355308
ENSG00000089916	GPATCH2L	G patch domain containing 2-like [Source:HGNC Symbol;Acc:HGNC:20210]	protein_coding	1.22851e-05	0.332212	0.0141638	-0.214556	0.305788	0.432181	0.00318946	-0.546768	0.000144717	0.0999683	0.640779	0.646736	3.41938e-05
ENSG00000090006	LTBP4	latent transforming growth factor beta binding protein 4 [Source:HGNC Symbol;Acc:HGNC:6717]	protein_coding	0.579521	-0.0776454	0.65452	0.109137	0.69747	0.108732	0.567206	0.186783	0.297251	0.186377	0.403958	-0.000405537	0.998603
ENSG00000090013	BLVRB	biliverdin reductase B [Source:HGNC Symbol;Acc:HGNC:1063]	protein_coding	0.0834147	0.340516	0.0172387	0.265525	0.207497	0.164566	0.326971	-0.0749913	0.672371	-0.17595	0.391348	-0.100958	0.61168
ENSG00000090020	SLC9A1	solute carrier family 9, subfamily A (NHE1, cation proton antiporter 1), member 1 [Source:HGNC Symbol;Acc:HGNC:11071]	protein_coding	9.75915e-25	1.09033	3.95229e-20	0.196499	0.311383	0.953167	2.0018e-13	-0.893832	5.00778e-12	-0.137164	0.453665	0.756667	1.02939e-07
ENSG00000090054	SPTLC1	serine palmitoyltransferase, long chain base subunit 1 [Source:HGNC Symbol;Acc:HGNC:11277]	protein_coding	0.00040912	0.310322	0.000550203	-0.0295968	0.872178	0.165634	0.110504	-0.339918	0.000491672	-0.144688	0.253965	0.195231	0.0840164
ENSG00000090060	PAPOLA	poly(A) polymerase alpha [Source:HGNC Symbol;Acc:HGNC:14981]	protein_coding	0.028135	-0.040766	0.644681	-0.231113	0.028131	-0.126648	0.161567	-0.190347	0.028089	-0.0858816	0.46042	0.104466	0.309426
ENSG00000090061	CCNK	cyclin K [Source:HGNC Symbol;Acc:HGNC:1596]	protein_coding	0.0847981	0.195524	0.0414625	0.0542044	0.758083	-0.0242366	0.844642	-0.141319	0.189513	-0.21976	0.0739194	-0.078441	0.545601
ENSG00000090097	PCBP4	poly(rC) binding protein 4 [Source:HGNC Symbol;Acc:HGNC:8652]	protein_coding	0.00194191	0.405219	0.00155529	-0.0150179	0.959946	0.245556	0.0943478	-0.420237	0.00260561	-0.159663	0.392865	0.260574	0.106581
ENSG00000090238	YPEL3	yippee-like 3 (Drosophila) [Source:HGNC Symbol;Acc:HGNC:18327]	protein_coding	2.31696e-52	2.32917	7.2805e-43	0.536024	0.0267165	2.18146	2.50648e-32	-1.79315	2.28737e-22	-0.147706	0.593593	1.64544	2.16905e-16
ENSG00000090263	MRPS33	mitochondrial ribosomal protein S33 [Source:HGNC Symbol;Acc:HGNC:16634]	protein_coding	1.62933e-09	-0.736665	1.09799e-06	0.109277	0.696746	-0.623436	0.000183105	0.845942	2.11341e-07	0.113229	0.652972	-0.732713	4.47627e-05
ENSG00000090266	NDUFB2	NADH dehydrogenase (ubiquinone) 1 beta subcomplex, 2, 8kDa [Source:HGNC Symbol;Acc:HGNC:7697]	protein_coding	0.000425994	-0.37608	0.0140945	0.114183	0.67534	-0.456733	0.00621528	0.490263	0.00284102	-0.080653	0.753398	-0.570916	0.00144451
ENSG00000090273	NUDC	nudC nuclear distribution protein [Source:HGNC Symbol;Acc:HGNC:8045]	protein_coding	0.254146	0.26532	0.204043	0.185127	0.59054	-0.110649	0.657976	-0.0801929	0.750577	-0.375968	0.161662	-0.295775	0.248427
ENSG00000090316	MAEA	macrophage erythroblast attacher [Source:HGNC Symbol;Acc:HGNC:13731]	protein_coding	0.0293895	0.184495	0.0469834	-0.0850104	0.58948	0.0174626	0.885633	-0.269506	0.00648409	-0.167033	0.178173	0.102473	0.399043
ENSG00000090339	ICAM1	intercellular adhesion molecule 1 [Source:HGNC Symbol;Acc:HGNC:5344]	protein_coding	1.40205e-06	0.984261	9.08947e-08	0.418717	0.124251	0.628061	0.00246685	-0.565544	0.00579704	-0.3562	0.162471	0.209344	0.407733
ENSG00000090372	STRN4	striatin, calmodulin binding protein 4 [Source:HGNC Symbol;Acc:HGNC:15721]	protein_coding	1.94415e-13	0.471022	5.10571e-10	-0.0274044	0.862148	-0.0145994	0.889493	-0.498427	1.37456e-09	-0.485622	4.22714e-08	0.0128049	0.91532
ENSG00000090376	IRAK3	interleukin-1 receptor-associated kinase 3 [Source:HGNC Symbol;Acc:HGNC:17020]	protein_coding	0.00217141	-1.87068	0.00361234	0.199945	0.852284	-1.23275	0.0678492	2.07063	0.0022462	0.63793	0.537268	-1.4327	0.0467044
ENSG00000090382	LYZ	lysozyme [Source:HGNC Symbol;Acc:HGNC:6740]	protein_coding	2.98900223645953e-314	-2.19751	7.1131e-185	0.136136	0.268669	-2.22972	6.2872e-163	2.33365	8.21281e-179	-0.032214	0.818495	-2.36586	2.64067e-160
ENSG00000090402	SI	sucrase-isomaltase (alpha-glucosidase) [Source:HGNC Symbol;Acc:HGNC:10856]	protein_coding	0.000436535	-0.474453	0.356878	0.779447	0.289689	1.44797	0.0055967	1.2539	0.0167541	1.92242	0.000707769	0.668524	0.280755
ENSG00000090432	MUL1	mitochondrial E3 ubiquitin protein ligase 1 [Source:HGNC Symbol;Acc:HGNC:25762]	protein_coding	7.18637e-17	0.568058	8.11244e-12	-0.129007	0.347957	0.117526	0.248307	-0.697065	9.93115e-15	-0.450532	5.89958e-06	0.246533	0.0197066
ENSG00000090447	TFAP4	transcription factor AP-4 (activating enhancer binding protein 4) [Source:HGNC Symbol;Acc:HGNC:11745]	protein_coding	5.96647e-22	-2.28845	6.6212e-19	-0.667506	0.0564629	-1.97652	1.02232e-12	1.62094	9.54921e-09	0.311925	0.449554	-1.30902	2.12566e-05
ENSG00000090470	PDCD7	programmed cell death 7 [Source:HGNC Symbol;Acc:HGNC:8767]	protein_coding	0.015862	-0.337762	0.0136104	-0.0136612	0.96451	0.0700855	0.678223	0.324101	0.0303839	0.407848	0.0162525	0.0837468	0.658931
ENSG00000090487	SPG21	spastic paraplegia 21 (autosomal recessive, Mast syndrome) [Source:HGNC Symbol;Acc:HGNC:20373]	protein_coding	0.00112521	-0.306055	0.00118381	-0.0651528	0.707916	-0.294665	0.00463519	0.240902	0.021339	0.0113905	0.949101	-0.229512	0.0492045
ENSG00000090520	DNAJB11	DnaJ (Hsp40) homolog, subfamily B, member 11 [Source:HGNC Symbol;Acc:HGNC:14889]	protein_coding	4.75126e-22	0.549857	3.92279e-11	-0.228577	0.0553171	-0.122661	0.225743	-0.778434	3.78366e-18	-0.672518	1.6465e-12	0.105916	0.356815
ENSG00000090530	P3H2	prolyl 3-hydroxylase 2 [Source:HGNC Symbol;Acc:HGNC:19317]	protein_coding	0.90754	-0.350632	0.524759	-0.186911	0.850299	-0.11119	0.865729	0.163721	0.798734	0.239442	0.778175	0.0757211	0.921297
ENSG00000090554	FLT3LG	fms-related tyrosine kinase 3 ligand [Source:HGNC Symbol;Acc:HGNC:3766]	protein_coding	0.143267	0.568938	0.114153	0.537086	0.308872	0.784915	0.038476	-0.0318522	0.945187	0.215978	0.693661	0.24783	0.58982
ENSG00000090565	RAB11FIP3	RAB11 family interacting protein 3 (class II) [Source:HGNC Symbol;Acc:HGNC:17224]	protein_coding	7.7975e-09	0.708569	7.21739e-07	0.364662	0.0742766	0.871193	1.54366e-08	-0.343907	0.0332808	0.162623	0.447694	0.50653	0.00336254
ENSG00000090581	GNPTG	N-acetylglucosamine-1-phosphate transferase, gamma subunit [Source:HGNC Symbol;Acc:HGNC:23026]	protein_coding	0.00234302	-0.102417	0.39528	0.262262	0.0886023	-0.152403	0.239964	0.364679	0.00228399	-0.0499856	0.792797	-0.414665	0.00148368
ENSG00000090612	ZNF268	zinc finger protein 268 [Source:HGNC Symbol;Acc:HGNC:13061]	protein_coding	0.958865	0.00331112	0.973803	-0.0392684	0.812067	0.0040308	0.970655	-0.0425795	0.692168	0.000719687	0.997228	0.0432992	0.725923
ENSG00000090615	GOLGA3	golgin A3 [Source:HGNC Symbol;Acc:HGNC:4426]	protein_coding	3.11565e-20	0.511275	6.86625e-13	0.0359072	0.801359	0.551972	8.6761e-13	-0.475368	8.62572e-10	0.040697	0.740038	0.516065	8.01596e-10
ENSG00000090621	PABPC4	poly(A) binding protein, cytoplasmic 4 (inducible form) [Source:HGNC Symbol;Acc:HGNC:8557]	protein_coding	6.03306e-47	-0.915575	3.11331e-40	-0.169797	0.088937	-0.674814	1.91843e-19	0.745778	2.54425e-23	0.240761	0.00788507	-0.505017	7.31967e-10
ENSG00000090674	MCOLN1	mucolipin 1 [Source:HGNC Symbol;Acc:HGNC:13356]	protein_coding	2.6982e-12	0.852652	2.15072e-10	0.0431928	0.881034	0.627612	2.51696e-05	-0.809459	3.07331e-08	-0.225039	0.240954	0.584419	0.000343101
ENSG00000090686	USP48	ubiquitin specific peptidase 48 [Source:HGNC Symbol;Acc:HGNC:18533]	protein_coding	1.6886e-23	-0.775172	1.68464e-17	0.0552467	0.749915	-0.528785	1.09977e-07	0.830419	2.56796e-17	0.246387	0.0461839	-0.584032	5.34789e-08
ENSG00000090776	EFNB1	ephrin-B1 [Source:HGNC Symbol;Acc:HGNC:3226]	protein_coding	2.06454e-82	1.26273	1.68203e-60	-0.0695739	0.631515	0.59948	2.10927e-12	-1.3323	1.63813e-57	-0.663248	9.73942e-14	0.669054	3.83319e-13
ENSG00000090857	PDPR	pyruvate dehydrogenase phosphatase regulatory subunit [Source:HGNC Symbol;Acc:HGNC:30264]	protein_coding	2.77118e-08	-0.713916	6.87147e-08	0.0384492	0.890116	-0.238921	0.12379	0.752365	1.53821e-07	0.474995	0.00435569	-0.27737	0.101103
ENSG00000090861	AARS	alanyl-tRNA synthetase [Source:HGNC Symbol;Acc:HGNC:20]	protein_coding	0.0014989	0.268077	0.00246234	-0.0454742	0.788915	0.155739	0.126674	-0.313551	0.00107339	-0.112337	0.382581	0.201214	0.0674574
ENSG00000090863	GLG1	golgi glycoprotein 1 [Source:HGNC Symbol;Acc:HGNC:4316]	protein_coding	0.0277421	-0.0881614	0.386458	-0.286024	0.0229841	-0.0391307	0.744724	-0.197863	0.05978	0.0490307	0.755973	0.246893	0.0313945
ENSG00000090889	KIF4A	kinesin family member 4A [Source:HGNC Symbol;Acc:HGNC:13339]	protein_coding	1.53504e-15	-0.863468	2.33776e-06	-0.238126	0.436266	-1.57983	8.28137e-16	0.625342	0.00206009	-0.716363	0.00160142	-1.34171	3.69267e-10
ENSG00000090905	TNRC6A	trinucleotide repeat containing 6A [Source:HGNC Symbol;Acc:HGNC:11969]	protein_coding	0.809181	-0.0596908	0.559474	-0.0330418	0.856685	0.0279649	0.814615	0.026649	0.822829	0.0876557	0.532662	0.0610067	0.638946
ENSG00000090924	PLEKHG2	pleckstrin homology domain containing, family G (with RhoGef domain) member 2 [Source:HGNC Symbol;Acc:HGNC:29515]	protein_coding	8.32963e-13	0.817884	9.05549e-10	-0.131667	0.585497	0.382684	0.0123882	-0.949551	5.19768e-11	-0.4352	0.0108813	0.514351	0.00171541
ENSG00000090971	NAT14	N-acetyltransferase 14 (GCN5-related, putative) [Source:HGNC Symbol;Acc:HGNC:28918]	protein_coding	0.745665	-0.0924752	0.731453	0.133896	0.754802	-0.1176	0.691678	0.226371	0.414326	-0.0251245	0.955082	-0.251496	0.419
ENSG00000090975	PITPNM2	phosphatidylinositol transfer protein, membrane-associated 2 [Source:HGNC Symbol;Acc:HGNC:21044]	protein_coding	0.166354	-0.368328	0.132003	-0.406057	0.253375	-0.478125	0.072109	-0.037729	0.904852	-0.109798	0.784202	-0.0720687	0.838742
ENSG00000090989	EXOC1	exocyst complex component 1 [Source:HGNC Symbol;Acc:HGNC:30380]	protein_coding	3.39205e-05	0.230612	0.0258619	-0.265582	0.0595776	0.140867	0.237449	-0.496194	4.64791e-06	-0.089745	0.569431	0.406449	0.000728429
ENSG00000091009	RBM27	RNA binding motif protein 27 [Source:HGNC Symbol;Acc:HGNC:29243]	protein_coding	1.59958e-10	-0.592348	1.25605e-08	-0.295263	0.0402401	-0.648921	9.95464e-09	0.297085	0.0117664	-0.0565731	0.75755	-0.353658	0.00601503
ENSG00000091039	OSBPL8	oxysterol binding protein-like 8 [Source:HGNC Symbol;Acc:HGNC:16396]	protein_coding	0.00011729	-0.00616094	0.976006	-0.761864	0.000441875	-0.214984	0.293204	-0.755703	4.51196e-05	-0.208823	0.409628	0.546881	0.00885944
ENSG00000091073	DTX2	deltex 2, E3 ubiquitin ligase [Source:HGNC Symbol;Acc:HGNC:15973]	protein_coding	0.0435714	-0.102931	0.517541	0.306932	0.137992	0.103556	0.561379	0.409862	0.00911402	0.206487	0.313302	-0.203375	0.276964
ENSG00000091127	PUS7	pseudouridylate synthase 7 (putative) [Source:HGNC Symbol;Acc:HGNC:26033]	protein_coding	7.32073e-82	-2.39682	1.78622e-56	-0.651712	0.000805934	-2.5993	7.78044e-56	1.74511	3.48669e-26	-0.202481	0.402937	-1.94759	1.12097e-27
ENSG00000091136	LAMB1	laminin, beta 1 [Source:HGNC Symbol;Acc:HGNC:6486]	protein_coding	4.07169e-07	-0.675146	0.00291935	-0.322237	0.374855	-1.33953	2.54424e-08	0.35291	0.175439	-0.66438	0.0201967	-1.01729	0.000132003
ENSG00000091138	SLC26A3	solute carrier family 26 (anion exchanger), member 3 [Source:HGNC Symbol;Acc:HGNC:3018]	protein_coding	0.00921527	-1.87343	0.0492892	1.26399	0.372141	1.0121	0.338483	3.13742	0.00158531	2.88554	0.0114024	-0.251889	0.849616
ENSG00000091140	DLD	dihydrolipoamide dehydrogenase [Source:HGNC Symbol;Acc:HGNC:2898]	protein_coding	7.52267e-12	-0.517728	3.30643e-08	-0.178745	0.212308	-0.637597	3.53236e-10	0.338983	0.00115516	-0.119869	0.397468	-0.458852	4.5663e-05
ENSG00000091157	WDR7	WD repeat domain 7 [Source:HGNC Symbol;Acc:HGNC:13490]	protein_coding	0.134077	-0.29334	0.026858	-0.189873	0.350059	-0.168524	0.267059	0.103467	0.51342	0.124815	0.534037	0.0213486	0.914483
ENSG00000091164	TXNL1	thioredoxin-like 1 [Source:HGNC Symbol;Acc:HGNC:12436]	protein_coding	0.000775576	0.148288	0.23976	-0.14168	0.472378	-0.346773	0.0084471	-0.289967	0.0275675	-0.495061	0.000491337	-0.205093	0.178628
ENSG00000091262	ABCC6	ATP-binding cassette, sub-family C (CFTR/MRP), member 6 [Source:HGNC Symbol;Acc:HGNC:57]	protein_coding	3.81311e-11	-0.213266	0.0967094	0.583361	8.76586e-05	0.417591	0.00167043	0.796627	5.42981e-10	0.630857	8.8315e-06	-0.16577	0.294617
ENSG00000091317	CMTM6	CKLF-like MARVEL transmembrane domain containing 6 [Source:HGNC Symbol;Acc:HGNC:19177]	protein_coding	2.53484e-08	0.365299	0.000670258	-0.262017	0.0854625	0.310013	0.00954268	-0.627317	3.90763e-08	-0.0552866	0.761461	0.57203	5.106e-06
ENSG00000091409	ITGA6	integrin, alpha 6 [Source:HGNC Symbol;Acc:HGNC:6142]	protein_coding	2.66149e-27	0.238218	0.0451743	-0.826636	5.14732e-10	-0.830782	9.81968e-12	-1.06485	1.04894e-18	-1.069	2.60681e-17	-0.00414608	0.981756
ENSG00000091436		Mitogen-activated protein kinase kinase kinase MLT [Source:UniProtKB/Swiss-Prot;Acc:Q9NYL2]	protein_coding	3.96011e-06	-0.541185	0.00248429	-0.423327	0.0933678	-0.975898	3.28464e-07	0.117859	0.594424	-0.434713	0.0649534	-0.552571	0.0110643
ENSG00000091483	FH	fumarate hydratase [Source:HGNC Symbol;Acc:HGNC:3700]	protein_coding	2.76923e-23	-0.825546	2.32459e-14	-0.297791	0.051437	-1.06002	1.75809e-19	0.527755	1.05103e-05	-0.234478	0.125155	-0.762233	3.43492e-09
ENSG00000091490	SEL1L3	sel-1 suppressor of lin-12-like 3 (C. elegans) [Source:HGNC Symbol;Acc:HGNC:29108]	protein_coding	0.782543	-0.057794	0.642976	-0.11698	0.531172	-0.0711764	0.605184	-0.0591855	0.669331	-0.0133824	0.948334	0.0458031	0.779104
ENSG00000091527	CDV3	CDV3 homolog (mouse) [Source:HGNC Symbol;Acc:HGNC:26928]	protein_coding	2.54726e-13	0.238997	0.000850776	-0.353079	6.64135e-05	0.0179253	0.850935	-0.592076	3.92166e-15	-0.221072	0.014257	0.371004	9.93731e-06
ENSG00000091536	MYO15A	myosin XVA [Source:HGNC Symbol;Acc:HGNC:7594]	protein_coding	0.0659904	0.393404	0.442648	0.6821	0.340035	1.20745	0.0150067	0.288695	0.604953	0.814048	0.183054	0.525353	0.362728
ENSG00000091542	ALKBH5	AlkB family member 5, RNA demethylase [Source:HGNC Symbol;Acc:HGNC:25996]	protein_coding	0.338867	-0.0173698	0.86348	0.04766	0.765297	0.133286	0.174299	0.0650298	0.529084	0.150656	0.197218	0.0856257	0.454
ENSG00000091583	APOH	apolipoprotein H (beta-2-glycoprotein I) [Source:HGNC Symbol;Acc:HGNC:616]	protein_coding	8.5216e-16	-3.28204	5.23584e-12	0.244276	0.7096	-1.40191	0.000887663	3.52631	1.07916e-12	1.88013	0.00180803	-1.64618	0.000240488
ENSG00000091592	NLRP1	NLR family, pyrin domain containing 1 [Source:HGNC Symbol;Acc:HGNC:14374]	protein_coding	3.98814e-11	1.10885	3.74425e-09	0.0667884	0.864715	0.926556	7.99585e-06	-1.04207	3.76553e-07	-0.182298	0.537581	0.859768	0.000155446
ENSG00000091622	PITPNM3	PITPNM family member 3 [Source:HGNC Symbol;Acc:HGNC:21043]	protein_coding	0.00991421	-0.320784	0.00184722	-0.167927	0.286956	-0.250398	0.0293664	0.152857	0.199612	0.0703863	0.679541	-0.0824703	0.564151
ENSG00000091640	SPAG7	sperm associated antigen 7 [Source:HGNC Symbol;Acc:HGNC:11216]	protein_coding	0.00400702	0.358613	0.000814266	0.0717299	0.720218	0.11308	0.382713	-0.286883	0.0154657	-0.245533	0.0840603	0.04135	0.796867
ENSG00000091651	ORC6	origin recognition complex, subunit 6 [Source:HGNC Symbol;Acc:HGNC:17151]	protein_coding	4.28612e-121	-3.38424	1.27126e-80	-0.370791	0.0810894	-2.93268	4.83166e-58	3.01345	2.26748e-57	0.451562	0.0980871	-2.56189	1.13081e-39
ENSG00000091656	ZFHX4	zinc finger homeobox 4 [Source:HGNC Symbol;Acc:HGNC:30939]	protein_coding	0.481925	0.673143	0.401752	0.560627	0.670689	1.17198	0.159114	-0.112516	0.907382	0.498839	0.665159	0.611355	0.529478
ENSG00000091732	ZC3HC1	zinc finger, C3HC-type containing 1 [Source:HGNC Symbol;Acc:HGNC:29913]	protein_coding	0.000565578	-0.42348	0.00351837	0.0924136	0.724848	-0.352948	0.0283502	0.515894	0.000906887	0.0705319	0.778933	-0.445362	0.0099407
ENSG00000091844	RGS17	regulator of G-protein signaling 17 [Source:HGNC Symbol;Acc:HGNC:14088]	protein_coding	4.93799e-35	2.01808	2.19871e-21	-0.310436	0.429194	1.77679	1.24903e-14	-2.32852	7.51252e-23	-0.241295	0.431264	2.08722	2.68034e-16
ENSG00000091947	TMEM101	transmembrane protein 101 [Source:HGNC Symbol;Acc:HGNC:28653]	protein_coding	0.531625	0.110942	0.408979	0.185782	0.335479	0.076658	0.619327	0.0748393	0.623103	-0.0342842	0.878666	-0.109124	0.51708
ENSG00000091986	CCDC80	coiled-coil domain containing 80 [Source:HGNC Symbol;Acc:HGNC:30649]	protein_coding	0.053457	0.703727	0.432502	0.250448	0.882382	2.07305	0.0212222	-0.453279	0.658051	1.36932	0.217924	1.8226	0.0684844
ENSG00000092010	PSME1	proteasome (prosome, macropain) activator subunit 1 (PA28 alpha) [Source:HGNC Symbol;Acc:HGNC:9568]	protein_coding	0.0908963	-0.21306	0.0699778	0.00330823	0.991026	-0.209838	0.107905	0.216369	0.0924439	0.0032225	0.988437	-0.213146	0.140001
ENSG00000092020	PPP2R3C	protein phosphatase 2, regulatory subunit B'', gamma [Source:HGNC Symbol;Acc:HGNC:17485]	protein_coding	4.65259e-15	0.533078	9.40554e-09	-0.226267	0.100581	0.315108	0.00264155	-0.759345	4.6157e-14	-0.21797	0.0817273	0.541375	1.17015e-06
ENSG00000092036	HAUS4	HAUS augmin-like complex, subunit 4 [Source:HGNC Symbol;Acc:HGNC:20163]	protein_coding	1.21629e-32	-1.02412	8.62697e-24	-0.036136	0.862305	-0.854855	1.09948e-14	0.987986	2.92128e-19	0.169267	0.265998	-0.818719	8.32627e-12
ENSG00000092068	SLC7A8	solute carrier family 7 (amino acid transporter light chain, L system), member 8 [Source:HGNC Symbol;Acc:HGNC:11066]	protein_coding	3.01391e-13	-1.74443	2.85358e-07	0.569565	0.18005	-1.25423	0.000409636	2.314	4.58394e-11	0.490195	0.357038	-1.8238	6.58421e-07
ENSG00000092094	OSGEP	O-sialoglycoprotein endopeptidase [Source:HGNC Symbol;Acc:HGNC:18028]	protein_coding	0.0838918	-0.127506	0.233914	0.140885	0.376907	-0.0364396	0.779197	0.268391	0.0151899	0.0910665	0.560741	-0.177325	0.164329
ENSG00000092098	RNF31	ring finger protein 31 [Source:HGNC Symbol;Acc:HGNC:16031]	protein_coding	0.993694	0.00527292	0.959882	0.0231395	0.89934	0.0174797	0.881605	0.0178666	0.877491	0.0122068	0.941253	-0.00565982	0.966394
ENSG00000092108	SCFD1	sec1 family domain containing 1 [Source:HGNC Symbol;Acc:HGNC:20726]	protein_coding	5.57468e-08	0.269894	6.37714e-05	-0.137	0.173885	0.00896554	0.922121	-0.406893	1.83956e-08	-0.260928	0.00163009	0.145965	0.089437
ENSG00000092140	G2E3	G2/M-phase specific E3 ubiquitin protein ligase [Source:HGNC Symbol;Acc:HGNC:20338]	protein_coding	2.4373e-15	-1.19952	1.05034e-13	-0.474231	0.0346376	-1.08571	7.07956e-10	0.72529	5.27747e-05	0.113814	0.681888	-0.611476	0.00211183
ENSG00000092148	HECTD1	HECT domain containing E3 ubiquitin protein ligase 1 [Source:HGNC Symbol;Acc:HGNC:20157]	protein_coding	1.75318e-06	0.2376	0.0160699	-0.191311	0.184934	0.327529	0.00210945	-0.428911	3.87063e-05	0.0899296	0.549204	0.518841	4.32575e-06
ENSG00000092199	HNRNPC	heterogeneous nuclear ribonucleoprotein C (C1/C2) [Source:HGNC Symbol;Acc:HGNC:5035]	protein_coding	1.0077e-10	-0.351356	0.00019384	-0.0277846	0.888561	-0.61972	7.46232e-10	0.323572	0.00175613	-0.268363	0.0267908	-0.591935	6.72592e-08
ENSG00000092201	SUPT16H	suppressor of Ty 16 homolog (S. cerevisiae) [Source:HGNC Symbol;Acc:HGNC:11465]	protein_coding	5.44665e-46	-1.13564	2.30537e-31	-0.25417	0.0738763	-1.20873	3.28149e-30	0.881474	1.18304e-16	-0.0730914	0.66021	-0.954565	1.18995e-16
ENSG00000092203	TOX4	TOX high mobility group box family member 4 [Source:HGNC Symbol;Acc:HGNC:20161]	protein_coding	1.14414e-12	0.39966	1.16392e-10	0.0509852	0.658682	0.33435	9.43876e-07	-0.348675	2.62287e-07	-0.0653099	0.498241	0.283365	0.000158876
ENSG00000092208	GEMIN2	gem (nuclear organelle) associated protein 2 [Source:HGNC Symbol;Acc:HGNC:10884]	protein_coding	2.14791e-15	-1.26161	5.41088e-13	-0.0977651	0.767141	-0.957837	4.83877e-07	1.16385	8.48036e-10	0.303775	0.239408	-0.860072	3.58563e-05
ENSG00000092295	TGM1	transglutaminase 1 [Source:HGNC Symbol;Acc:HGNC:11777]	protein_coding	0.122494	0.426166	0.113436	0.0862103	0.867732	0.544995	0.0580872	-0.339956	0.254989	0.118829	0.783203	0.458785	0.154131
ENSG00000092330	TINF2	TERF1 (TRF1)-interacting nuclear factor 2 [Source:HGNC Symbol;Acc:HGNC:11824]	protein_coding	3.04952e-13	0.468092	6.92023e-12	0.0237679	0.867469	0.264276	0.000578893	-0.444325	2.19385e-09	-0.203817	0.0221897	0.240508	0.00445148
ENSG00000092439	TRPM7	transient receptor potential cation channel, subfamily M, member 7 [Source:HGNC Symbol;Acc:HGNC:17994]	protein_coding	0.143825	-0.220322	0.0874158	-0.125092	0.554419	0.0481631	0.761996	0.0952298	0.529802	0.268485	0.1039	0.173255	0.284043
ENSG00000092445	TYRO3	TYRO3 protein tyrosine kinase [Source:HGNC Symbol;Acc:HGNC:12446]	protein_coding	0.00499865	-0.0804375	0.632	0.237825	0.297135	-0.350788	0.036157	0.318262	0.0541495	-0.27035	0.189816	-0.588613	0.000783405
ENSG00000092470	WDR76	WD repeat domain 76 [Source:HGNC Symbol;Acc:HGNC:25773]	protein_coding	9.61239e-102	-4.76316	1.1854e-59	-0.163241	0.681626	-4.02475	4.58354e-46	4.59992	2.90983e-51	0.738408	0.102731	-3.86151	1.48803e-38
ENSG00000092529	CAPN3	calpain 3, (p94) [Source:HGNC Symbol;Acc:HGNC:1480]	protein_coding	1.50844e-06	-1.30774	0.0013006	0.865061	0.109445	-0.519782	0.260418	2.1728	2.67927e-07	0.787953	0.159369	-1.38484	0.00263004
ENSG00000092531	SNAP23	synaptosomal-associated protein, 23kDa [Source:HGNC Symbol;Acc:HGNC:11131]	protein_coding	2.92327e-33	0.924872	1.57949e-22	-0.103661	0.542136	0.675632	8.77932e-11	-1.02853	1.29266e-23	-0.249239	0.049677	0.779293	4.38737e-12
ENSG00000092607	TBX15	T-box 15 [Source:HGNC Symbol;Acc:HGNC:11594]	protein_coding	3.14034e-26	0.918194	5.20998e-19	-0.0588944	0.775715	0.651818	9.85919e-09	-0.977089	2.47115e-18	-0.266376	0.0535364	0.710712	8.27384e-09
ENSG00000092621	PHGDH	phosphoglycerate dehydrogenase [Source:HGNC Symbol;Acc:HGNC:8923]	protein_coding	5.34066e-16	-1.46764	2.58135e-09	0.498446	0.16382	-1.07955	6.54411e-05	1.96609	7.44372e-14	0.388093	0.287242	-1.57799	3.52396e-08
ENSG00000092758	COL9A3	collagen, type IX, alpha 3 [Source:HGNC Symbol;Acc:HGNC:2219]	protein_coding	2.22204e-12	-2.09521	3.65619e-10	-0.068933	0.91774	-1.65387	4.03617e-06	2.02627	1.81127e-08	0.441336	0.399077	-1.58494	4.70767e-05
ENSG00000092820	EZR	ezrin [Source:HGNC Symbol;Acc:HGNC:12691]	protein_coding	3.9126e-47	0.807772	1.71888e-28	-0.244822	0.016273	0.295276	0.000367443	-1.05259	8.27724e-41	-0.512496	1.99593e-09	0.540098	6.23455e-10
ENSG00000092841	MYL6	myosin, light chain 6, alkali, smooth muscle and non-muscle [Source:HGNC Symbol;Acc:HGNC:7587]	protein_coding	1.60844e-19	0.942446	9.7578e-19	0.209776	0.20738	0.598041	4.26898e-07	-0.73267	3.41318e-10	-0.344405	0.012837	0.388265	0.00344969
ENSG00000092847	AGO1	argonaute RISC catalytic component 1 [Source:HGNC Symbol;Acc:HGNC:3262]	protein_coding	4.1254e-17	-0.766929	8.82246e-17	-0.0739382	0.655001	-0.202538	0.0544621	0.692991	4.00538e-12	0.564391	2.58899e-07	-0.1286	0.291868
ENSG00000092853	CLSPN	claspin [Source:HGNC Symbol;Acc:HGNC:19715]	protein_coding	9.40351e-15	-4.05153	2.59487e-11	-0.250271	0.837356	-4.69267	2.36212e-12	3.80126	8.5827e-09	-0.641144	0.516091	-4.4424	8.96602e-10
ENSG00000092871	RFFL	ring finger and FYVE-like domain containing E3 ubiquitin protein ligase [Source:HGNC Symbol;Acc:HGNC:24821]	protein_coding	1.54621e-48	1.21559	3.84531e-34	-0.146437	0.391526	0.633337	1.23737e-08	-1.36203	2.90525e-36	-0.582253	9.61561e-07	0.779775	8.27127e-11
ENSG00000092929	UNC13D	unc-13 homolog D (C. elegans) [Source:HGNC Symbol;Acc:HGNC:23147]	protein_coding	2.81848e-10	1.0182	9.62535e-08	-0.21369	0.519697	0.406677	0.0676322	-1.23189	2.33558e-09	-0.611519	0.0121306	0.620367	0.00874222
ENSG00000092931	MFSD11	major facilitator superfamily domain containing 11 [Source:HGNC Symbol;Acc:HGNC:25458]	protein_coding	1.38832e-13	0.568821	4.55176e-09	-0.03412	0.866207	0.54215	3.05495e-07	-0.602941	1.04705e-08	-0.0266715	0.882556	0.57627	5.36992e-07
ENSG00000092964	DPYSL2	dihydropyrimidinase-like 2 [Source:HGNC Symbol;Acc:HGNC:3014]	protein_coding	1.42242e-08	0.787512	1.97851e-06	-0.0278529	0.939601	0.72624	6.8591e-05	-0.815365	6.06698e-06	-0.061272	0.837421	0.754093	0.000146403
ENSG00000092969	TGFB2	transforming growth factor, beta 2 [Source:HGNC Symbol;Acc:HGNC:11768]	protein_coding	4.66017e-08	0.58849	0.00686677	-0.69411	0.0164718	-0.368701	0.141633	-1.2826	2.10548e-08	-0.957191	0.000186656	0.325409	0.248997
ENSG00000092978	GPATCH2	G patch domain containing 2 [Source:HGNC Symbol;Acc:HGNC:25499]	protein_coding	0.24751	-0.255689	0.0841209	-0.217138	0.327762	-0.204038	0.219095	0.0385511	0.835901	0.0516512	0.840202	0.0131002	0.951707
ENSG00000093000	NUP50	nucleoporin 50kDa [Source:HGNC Symbol;Acc:HGNC:8065]	protein_coding	0.0738647	-0.182294	0.115046	-0.173537	0.317479	-0.296922	0.0161378	0.00875706	0.954299	-0.114628	0.494299	-0.123385	0.40862
ENSG00000093009	CDC45	cell division cycle 45 [Source:HGNC Symbol;Acc:HGNC:1739]	protein_coding	3.23553e-19	-4.46567	1.03615e-14	-0.242041	0.833701	-5.18345	5.01542e-16	4.22363	1.49888e-11	-0.717777	0.437979	-4.9414	7.73177e-13
ENSG00000093010	COMT	catechol-O-methyltransferase [Source:HGNC Symbol;Acc:HGNC:2228]	protein_coding	0.0709446	0.16456	0.0667261	0.0317329	0.854891	-0.0626399	0.5629	-0.132827	0.183766	-0.2272	0.0423132	-0.0943727	0.420868
ENSG00000093100			processed_transcript	5.38519e-05	1.26677	7.74687e-06	0.416416	0.368509	0.88283	0.0055591	-0.850351	0.00695432	-0.383937	0.353468	0.466414	0.2089
ENSG00000093144	ECHDC1	ethylmalonyl-CoA decarboxylase 1 [Source:HGNC Symbol;Acc:HGNC:21489]	protein_coding	1.69281e-30	-1.02724	1.9722e-24	-0.341156	0.0111196	-0.969173	6.69168e-19	0.686084	5.70783e-10	0.0580671	0.749039	-0.628016	1.95749e-07
ENSG00000093167	LRRFIP2	leucine rich repeat (in FLII) interacting protein 2 [Source:HGNC Symbol;Acc:HGNC:6703]	protein_coding	4.06932e-09	0.436736	1.21821e-07	0.175966	0.152911	0.476707	1.00837e-07	-0.260769	0.00459494	0.0399709	0.780956	0.30074	0.00268375
ENSG00000093183	SEC22C	SEC22 vesicle trafficking protein homolog C (S. cerevisiae) [Source:HGNC Symbol;Acc:HGNC:16828]	protein_coding	1.38078e-05	-0.37125	4.26542e-05	-0.0738289	0.650582	-0.353359	0.000386098	0.297421	0.00295909	0.0178908	0.916848	-0.27953	0.0117993
ENSG00000093217	XYLB	xylulokinase homolog (H. influenzae) [Source:HGNC Symbol;Acc:HGNC:12839]	protein_coding	1.12901e-15	-1.28212	1.82237e-13	0.0463615	0.896553	-0.703952	0.00020902	1.32848	1.31112e-12	0.578171	0.0112595	-0.750314	0.000259957
ENSG00000094631	HDAC6	histone deacetylase 6 [Source:HGNC Symbol;Acc:HGNC:14064]	protein_coding	0.00932252	-0.0175321	0.842612	0.222316	0.0265836	0.0717417	0.427709	0.239848	0.00315684	0.0892738	0.41838	-0.150574	0.108001
ENSG00000094755	GABRP	gamma-aminobutyric acid (GABA) A receptor, pi [Source:HGNC Symbol;Acc:HGNC:4089]	protein_coding	0.0752197	0.517938	0.261393	1.09188	0.0654912	0.900883	0.0634825	0.573946	0.2459	0.382945	0.562837	-0.191002	0.759192
ENSG00000094804	CDC6	cell division cycle 6 [Source:HGNC Symbol;Acc:HGNC:1744]	protein_coding	2.46576e-181	-2.6083	1.6929e-107	-0.407856	0.00709295	-3.07115	1.97331e-119	2.20045	9.74057e-67	-0.462844	0.00608706	-2.66329	7.25914e-80
ENSG00000094841	UPRT	uracil phosphoribosyltransferase (FUR1) homolog (S. cerevisiae) [Source:HGNC Symbol;Acc:HGNC:28334]	protein_coding	0.0132994	0.285959	0.0924085	0.031646	0.927321	0.488687	0.00616827	-0.254313	0.174823	0.202728	0.390299	0.457041	0.0202751
ENSG00000094880	CDC23	cell division cycle 23 [Source:HGNC Symbol;Acc:HGNC:1724]	protein_coding	9.93514e-06	-0.33911	2.65723e-06	-0.0615108	0.632421	-0.199525	0.0138759	0.277599	0.000465387	0.139585	0.168699	-0.138015	0.135355
ENSG00000094914	AAAS	achalasia, adrenocortical insufficiency, alacrimia [Source:HGNC Symbol;Acc:HGNC:13666]	protein_coding	1.49747e-06	-0.331403	0.0037562	0.298092	0.0558368	-0.116138	0.395618	0.629495	1.58959e-07	0.215266	0.166906	-0.41423	0.00209649
ENSG00000094916	CBX5	chromobox homolog 5 [Source:HGNC Symbol;Acc:HGNC:1555]	protein_coding	3.86866e-43	-1.29549	1.19957e-30	-0.104791	0.611643	-1.18842	3.07569e-22	1.1907	1.98221e-22	0.107068	0.560397	-1.08363	3.4048e-16
ENSG00000094975	SUCO	SUN domain containing ossification factor [Source:HGNC Symbol;Acc:HGNC:1240]	protein_coding	1.92477e-07	0.214461	0.100593	-0.556236	0.000432429	-0.0799798	0.612104	-0.770697	6.70491e-09	-0.294441	0.0743554	0.476257	0.00148734
ENSG00000095002	MSH2	mutS homolog 2 [Source:HGNC Symbol;Acc:HGNC:7325]	protein_coding	7.93286e-93	-1.99929	1.4724e-71	-0.27208	0.0851964	-1.66096	1.16952e-43	1.72721	1.99777e-46	0.338325	0.0279861	-1.38888	7.36253e-27
ENSG00000095015	MAP3K1	mitogen-activated protein kinase kinase kinase 1, E3 ubiquitin protein ligase [Source:HGNC Symbol;Acc:HGNC:6848]	protein_coding	1.14084e-05	0.493442	0.00592612	-0.127008	0.699144	0.697263	0.000299672	-0.62045	0.00133762	0.203821	0.438268	0.824271	7.6766e-05
ENSG00000095059	DHPS	deoxyhypusine synthase [Source:HGNC Symbol;Acc:HGNC:2869]	protein_coding	0.38203	-0.00248782	0.981074	0.132422	0.328245	0.0760321	0.471195	0.13491	0.175004	0.0785199	0.561158	-0.0563898	0.646126
ENSG00000095066	HOOK2	hook microtubule-tethering protein 2 [Source:HGNC Symbol;Acc:HGNC:19885]	protein_coding	0.373827	0.00903086	0.939098	0.154134	0.323007	0.106684	0.370529	0.145103	0.206576	0.097653	0.520233	-0.0474501	0.744569
ENSG00000095139	ARCN1	archain 1 [Source:HGNC Symbol;Acc:HGNC:649]	protein_coding	1.19619e-15	0.463137	1.92852e-10	-0.129285	0.261536	0.243671	0.00313387	-0.592423	4.49572e-14	-0.219467	0.0204247	0.372956	2.07246e-05
ENSG00000095203	EPB41L4B	erythrocyte membrane protein band 4.1 like 4B [Source:HGNC Symbol;Acc:HGNC:19818]	protein_coding	0.202786	0.178126	0.283818	-0.150558	0.576153	0.126979	0.505129	-0.328684	0.0592173	-0.0511468	0.853786	0.277537	0.160921
ENSG00000095209	TMEM38B	transmembrane protein 38B [Source:HGNC Symbol;Acc:HGNC:25535]	protein_coding	1.37658e-06	-1.22053	2.70423e-07	-0.180893	0.670689	-0.638572	0.0158783	1.03964	6.24029e-05	0.581957	0.0706192	-0.457679	0.128728
ENSG00000095261	PSMD5	proteasome (prosome, macropain) 26S subunit, non-ATPase, 5 [Source:HGNC Symbol;Acc:HGNC:9563]	protein_coding	0.00182736	0.209105	0.00519753	-0.0679097	0.603045	0.0236625	0.807602	-0.277015	0.000569383	-0.185443	0.0559765	0.0915722	0.355696
ENSG00000095303	PTGS1	prostaglandin-endoperoxide synthase 1 (prostaglandin G/H synthase and cyclooxygenase) [Source:HGNC Symbol;Acc:HGNC:9604]	protein_coding	0.0166493	0.953054	0.100475	-0.90358	0.361883	0.767281	0.239296	-1.85663	0.00509286	-0.185773	0.846611	1.67086	0.0222345
ENSG00000095319	NUP188	nucleoporin 188kDa [Source:HGNC Symbol;Acc:HGNC:17859]	protein_coding	2.61913e-33	-0.794633	7.00408e-17	-0.23378	0.0901313	-1.14561	1.39272e-28	0.560853	8.29739e-08	-0.350973	0.00452479	-0.911826	4.84806e-16
ENSG00000095321	CRAT	carnitine O-acetyltransferase [Source:HGNC Symbol;Acc:HGNC:2342]	protein_coding	8.38238e-09	0.579513	5.32612e-08	0.422069	0.00258399	0.629483	5.27991e-08	-0.157444	0.210509	0.0499707	0.787973	0.207414	0.130954
ENSG00000095380	NANS	N-acetylneuraminic acid synthase [Source:HGNC Symbol;Acc:HGNC:19237]	protein_coding	0.000423283	0.504197	0.000168093	0.437286	0.0149916	0.471685	0.00142521	-0.0669109	0.695686	-0.032512	0.89634	0.0343989	0.86679
ENSG00000095383	TBC1D2	TBC1 domain family, member 2 [Source:HGNC Symbol;Acc:HGNC:18026]	protein_coding	0.000171142	0.451069	3.37542e-05	0.10527	0.584551	0.271053	0.0284759	-0.345799	0.00396133	-0.180016	0.242374	0.165783	0.245833
ENSG00000095397	DFNB31	deafness, autosomal recessive 31 [Source:HGNC Symbol;Acc:HGNC:16361]	protein_coding	0.0644205	0.38764	0.288945	0.744984	0.117848	0.844517	0.0232615	0.357344	0.364426	0.456877	0.339027	0.0995334	0.839574
ENSG00000095485	CWF19L1	CWF19-like 1, cell cycle control (S. pombe) [Source:HGNC Symbol;Acc:HGNC:25613]	protein_coding	0.0194376	-0.304743	0.0293796	0.0557614	0.832973	-0.265986	0.0871942	0.360504	0.0164462	0.0387572	0.877897	-0.321747	0.0551118
ENSG00000095539	SEMA4G	sema domain, immunoglobulin domain (Ig), transmembrane domain (TM) and short cytoplasmic domain, (semaphorin) 4G [Source:HGNC Symbol;Acc:HGNC:10735]	protein_coding	2.97538e-16	0.361524	1.14593e-05	0.541338	3.05375e-08	0.709026	5.39863e-16	0.179815	0.0550513	0.347502	0.00048801	0.167687	0.110676
ENSG00000095564	BTAF1	BTAF1 RNA polymerase II, B-TFIID transcription factor-associated, 170kDa [Source:HGNC Symbol;Acc:HGNC:17307]	protein_coding	8.04713e-05	0.19944	0.211221	-0.174908	0.487574	0.547057	0.000829358	-0.374348	0.0249044	0.347616	0.0787826	0.721964	3.9413e-05
ENSG00000095574	IKZF5	IKAROS family zinc finger 5 (Pegasus) [Source:HGNC Symbol;Acc:HGNC:14283]	protein_coding	0.000654508	0.25434	0.0534798	-0.211828	0.287192	0.291465	0.0418521	-0.466168	0.00080756	0.0371244	0.872829	0.503292	0.000883815
ENSG00000095585	BLNK	B-cell linker [Source:HGNC Symbol;Acc:HGNC:14211]	protein_coding	1.59979e-06	-2.28818	0.00200212	1.75609	0.0549925	-0.127925	0.887509	4.04427	1.15869e-07	2.16026	0.0196798	-1.88402	0.0203267
ENSG00000095587	TLL2	tolloid-like 2 [Source:HGNC Symbol;Acc:HGNC:11844]	protein_coding	0.00893815	-1.23937	0.142432	1.10546	0.297802	1.10116	0.166873	2.34483	0.00504378	2.34053	0.0151862	-0.0042968	0.996653
ENSG00000095637	SORBS1	sorbin and SH3 domain containing 1 [Source:HGNC Symbol;Acc:HGNC:14565]	protein_coding	2.99564e-05	-0.804538	0.00133067	0.299788	0.448121	-0.594685	0.0327315	1.10433	3.19008e-05	0.209853	0.603466	-0.894473	0.00224532
ENSG00000095739	BAMBI	BMP and activin membrane-bound inhibitor [Source:HGNC Symbol;Acc:HGNC:30251]	protein_coding	5.05165e-42	-2.15692	1.81124e-41	-0.539308	0.014735	-1.4119	6.67642e-16	1.61761	1.74162e-20	0.74502	0.000183237	-0.872595	6.95352e-06
ENSG00000095752	IL11	interleukin 11 [Source:HGNC Symbol;Acc:HGNC:5966]	protein_coding	0.000517679	1.8245	0.00491668	-0.954984	0.420159	0.551248	0.499958	-2.77949	0.000223544	-1.27325	0.138318	1.50623	0.0900033
ENSG00000095777	MYO3A	myosin IIIA [Source:HGNC Symbol;Acc:HGNC:7601]	protein_coding	0.320875	0.313038	0.655712	1.03675	0.242254	0.100046	0.903744	0.723714	0.291337	-0.212992	0.847476	-0.936706	0.219211
ENSG00000095787	WAC	WW domain containing adaptor with coiled-coil [Source:HGNC Symbol;Acc:HGNC:17327]	protein_coding	0.000430195	0.296115	0.0046021	-0.138378	0.413966	0.142524	0.243871	-0.434493	0.000101382	-0.153591	0.298334	0.280902	0.0275675
ENSG00000095794	CREM	cAMP responsive element modulator [Source:HGNC Symbol;Acc:HGNC:2352]	protein_coding	0.900095	-0.072687	0.784035	0.097642	0.823968	-0.0477776	0.873777	0.170329	0.538212	0.0249094	0.954154	-0.14542	0.651145
ENSG00000095906	NUBP2	nucleotide binding protein 2 [Source:HGNC Symbol;Acc:HGNC:8042]	protein_coding	0.0540389	-0.228518	0.15568	0.188605	0.449853	-0.14109	0.447069	0.417122	0.0129718	0.087428	0.733448	-0.329694	0.0829369
ENSG00000095932	SMIM24	small integral membrane protein 24 [Source:HGNC Symbol;Acc:HGNC:37244]	protein_coding	3.96079e-24	-1.16623	4.36962e-11	0.750842	0.000970914	0.391556	0.0545629	1.91707	2.6292e-24	1.55778	6.33259e-15	-0.359286	0.112062
ENSG00000095951	HIVEP1	human immunodeficiency virus type I enhancer binding protein 1 [Source:HGNC Symbol;Acc:HGNC:4920]	protein_coding	0.00561407	0.416754	0.0131091	-0.00662609	0.987164	0.4455	0.0156098	-0.42338	0.0210704	0.0287463	0.925275	0.452126	0.0255637
ENSG00000096060	FKBP5	FK506 binding protein 5 [Source:HGNC Symbol;Acc:HGNC:3721]	protein_coding	3.60605e-05	-0.50523	0.0277758	-0.371936	0.284208	-1.15969	1.65446e-06	0.133294	0.635804	-0.654461	0.0232155	-0.787755	0.00368491
ENSG00000096063	SRPK1	SRSF protein kinase 1 [Source:HGNC Symbol;Acc:HGNC:11305]	protein_coding	1.69408e-49	-0.934293	1.70648e-29	-0.506051	5.86734e-07	-1.22028	7.36812e-42	0.428242	3.73334e-06	-0.285991	0.00927171	-0.714233	6.12982e-13
ENSG00000096070	BRPF3	bromodomain and PHD finger containing, 3 [Source:HGNC Symbol;Acc:HGNC:14256]	protein_coding	5.19397e-18	0.761173	3.20681e-13	0.209039	0.195575	0.830432	2.33888e-13	-0.552134	1.47972e-06	0.0692592	0.6952	0.621393	6.02418e-07
ENSG00000096080	MRPS18A	mitochondrial ribosomal protein S18A [Source:HGNC Symbol;Acc:HGNC:14515]	protein_coding	3.40533e-09	0.601147	6.61064e-09	0.0576533	0.777058	0.187071	0.129796	-0.543493	1.53845e-06	-0.414076	0.00126505	0.129417	0.363265
ENSG00000096088	PGC	progastricsin (pepsinogen C) [Source:HGNC Symbol;Acc:HGNC:8890]	protein_coding	0.0757021	1.18819	0.0876257	-0.0277044	0.987222	1.36869	0.0663313	-1.21589	0.11157	0.180502	0.8744	1.39639	0.0914786
ENSG00000096092	TMEM14A	transmembrane protein 14A [Source:HGNC Symbol;Acc:HGNC:21076]	protein_coding	0.0402554	-0.368297	0.00621708	-0.150124	0.49694	-0.228378	0.136371	0.218172	0.154078	0.139919	0.489933	-0.0782539	0.683241
ENSG00000096093	EFHC1	EF-hand domain (C-terminal) containing 1 [Source:HGNC Symbol;Acc:HGNC:16406]	protein_coding	0.000679697	0.565185	0.000695903	0.210535	0.445682	0.597619	0.0010686	-0.354649	0.059032	0.0324345	0.916022	0.387084	0.0622532
ENSG00000096384	HSP90AB1	heat shock protein 90kDa alpha (cytosolic), class B member 1 [Source:HGNC Symbol;Acc:HGNC:5258]	protein_coding	1.7294e-12	-0.431026	1.04092e-06	-0.309637	0.0089836	-0.686902	4.22079e-13	0.121389	0.248057	-0.255876	0.0256103	-0.377265	0.000396846
ENSG00000096401	CDC5L	cell division cycle 5-like [Source:HGNC Symbol;Acc:HGNC:1743]	protein_coding	0.342876	-0.190288	0.168167	-0.133714	0.550054	-0.221182	0.144152	0.0565738	0.73508	-0.0308943	0.898515	-0.0874682	0.639135
ENSG00000096433	ITPR3	inositol 1,4,5-trisphosphate receptor, type 3 [Source:HGNC Symbol;Acc:HGNC:6182]	protein_coding	2.15148e-13	0.66457	1.64289e-10	-0.0703865	0.72591	0.371271	0.00156337	-0.734956	7.03658e-11	-0.293298	0.0321465	0.441658	0.000496264
ENSG00000096654	ZNF184	zinc finger protein 184 [Source:HGNC Symbol;Acc:HGNC:12975]	protein_coding	0.336784	-0.212525	0.119292	-0.0439413	0.864658	-0.155859	0.311315	0.168584	0.268015	0.0566665	0.803217	-0.111917	0.53127
ENSG00000096696	DSP	desmoplakin [Source:HGNC Symbol;Acc:HGNC:3052]	protein_coding	0.24334	0.0555032	0.769956	-0.26628	0.296899	0.0533211	0.80303	-0.321783	0.0816835	-0.00218211	0.995411	0.319601	0.122696
ENSG00000096717	SIRT1	sirtuin 1 [Source:HGNC Symbol;Acc:HGNC:14929]	protein_coding	0.45676	-0.127169	0.371166	-0.203157	0.32124	-0.0383753	0.822018	-0.0759883	0.644385	0.0887934	0.680676	0.164782	0.341937
ENSG00000096746	HNRNPH3	heterogeneous nuclear ribonucleoprotein H3 (2H9) [Source:HGNC Symbol;Acc:HGNC:5043]	protein_coding	2.38236e-09	-0.580286	2.96683e-07	-0.127132	0.512973	-0.621849	4.73611e-07	0.453153	0.000283262	-0.0415627	0.841265	-0.494716	0.000288764
ENSG00000096872	IFT74	intraflagellar transport 74 [Source:HGNC Symbol;Acc:HGNC:21424]	protein_coding	6.04515e-24	-1.20775	1.59347e-17	0.0024646	0.99475	-0.949011	4.40356e-10	1.21021	1.74203e-15	0.258739	0.223531	-0.951476	6.50752e-09
ENSG00000096968	JAK2	Janus kinase 2 [Source:HGNC Symbol;Acc:HGNC:6192]	protein_coding	0.00716799	0.479141	0.0281475	-0.270357	0.445682	0.208238	0.422229	-0.749498	0.00129351	-0.270903	0.383938	0.478595	0.0740772
ENSG00000097007	ABL1	ABL proto-oncogene 1, non-receptor tyrosine kinase [Source:HGNC Symbol;Acc:HGNC:76]	protein_coding	0.00837033	-0.197527	0.0740014	0.0826125	0.665744	-0.25641	0.0322957	0.280139	0.0171348	-0.058883	0.744249	-0.339022	0.00826796
[truncated: 14,054 more rows]
